# Supplementary material for: Parallel kinetic resolution of aziridines via chiral phosphoric acid-catalyzed apparent hydrolytic ring-opening
Source: Royal Society of Chemistry journal article supplement (doi:10.1039/d3sc03899h), 2023-01-01
Supplement: d3sc03899h1.pdf [file d3sc03899h1.pdf]

## Supporting Information

### Parallel Kinetic Resolution of Aziridines via Chiral Phosphoric Acid-Catalyzed Apparent Hydrolytic Ring-Opening

Juan Liu, Yi-Ying Du, Yu-Shi He, Yan Liang, Shang-Zhong Liu, Yi-Yi Li,  
and Yi-Ming Cao\*

College of Science & China Key Laboratory of National Forestry and Grassland  
Administration on Pest Chemical Control,  
China Agricultural University, Beijing 100193 (China)

---

#### Table of Contents

|                                                                                            |      |
|--------------------------------------------------------------------------------------------|------|
| General Information.....                                                                   | S2   |
| Reaction Optimization.....                                                                 | S3   |
| General Procedures and Characterization Data for Substrates.....                           | S6   |
| General Procedures and Characterization Data for Hydrolytic Ring-Opening<br>Reactions..... | S23  |
| Absolute Configuration Determination and X-Ray Analysis Data.....                          | S63  |
| Procedures and Characterization Data for the Derivatizations.....                          | S65  |
| Mechanistic Studies.....                                                                   | S73  |
| References.....                                                                            | S78  |
| NMR Spectra.....                                                                           | S79  |
| HPLC Spectra.....                                                                          | S266 |

## General Information

$^1\text{H}$ ,  $^{13}\text{C}$  and  $^{19}\text{F}$  NMR spectral data were recorded at 500 MHz ( $^1\text{H}$ ), 126 MHz ( $^{13}\text{C}$ ) and 471 MHz ( $^{19}\text{F}$ ) on a BRUKER AVANCE500 spectrometer. The chemical shifts were referenced to the corresponding residual solvent signal ( $\text{CDCl}_3$ :  $\delta_{\text{H}} = 7.26$  ppm,  $\delta_{\text{C}} = 77.16$  ppm). The multiplicities of the signals are described using the following abbreviations: s = singlet, d = doublet, t = triplet, q = quartet, quint = quintet, br = broad. IR spectra were measured on NICOLET IS10. All IR spectra were measured with neat substances. High-resolution ESI-TOF mass spectra were measured on AB Sciex TripleTOF 5600. Optical rotation values were measured on a Hanon P850 polarimeter. The enantiomeric ratio was determined by chiral HPLC using Agilent 1260 equipped with CHIRALPAK® IA/IC. Products were purified by flash column chromatography on silica gel 300-400 mesh with freshly distilled solvents. Analytical thin-layer chromatography (TLC) was conducted with TLC plates (Silica gel HF254, Qingdao Xuesheng). Products were detected by UV light at 254 nm and/or by using staining reagents (based on  $\text{KMnO}_4$  or phosphomolybdic acid). Unless otherwise specified, all reagents were purchased from commercial distributors and used without further purification. Anhydrous THF, MeCN, MeOH and  $\text{CH}_2\text{Cl}_2$  were purchased from J&K Scientific Company. 3, 5-(*t*-Bu) $_2$ -4-OMe- $\text{C}_6\text{H}_2\text{COOH}$  was prepared according to the known protocol<sup>1</sup>.

## Reaction Optimization

Table S1. Condition optimization for reaction with aromatic aziridine as substrate. [a]

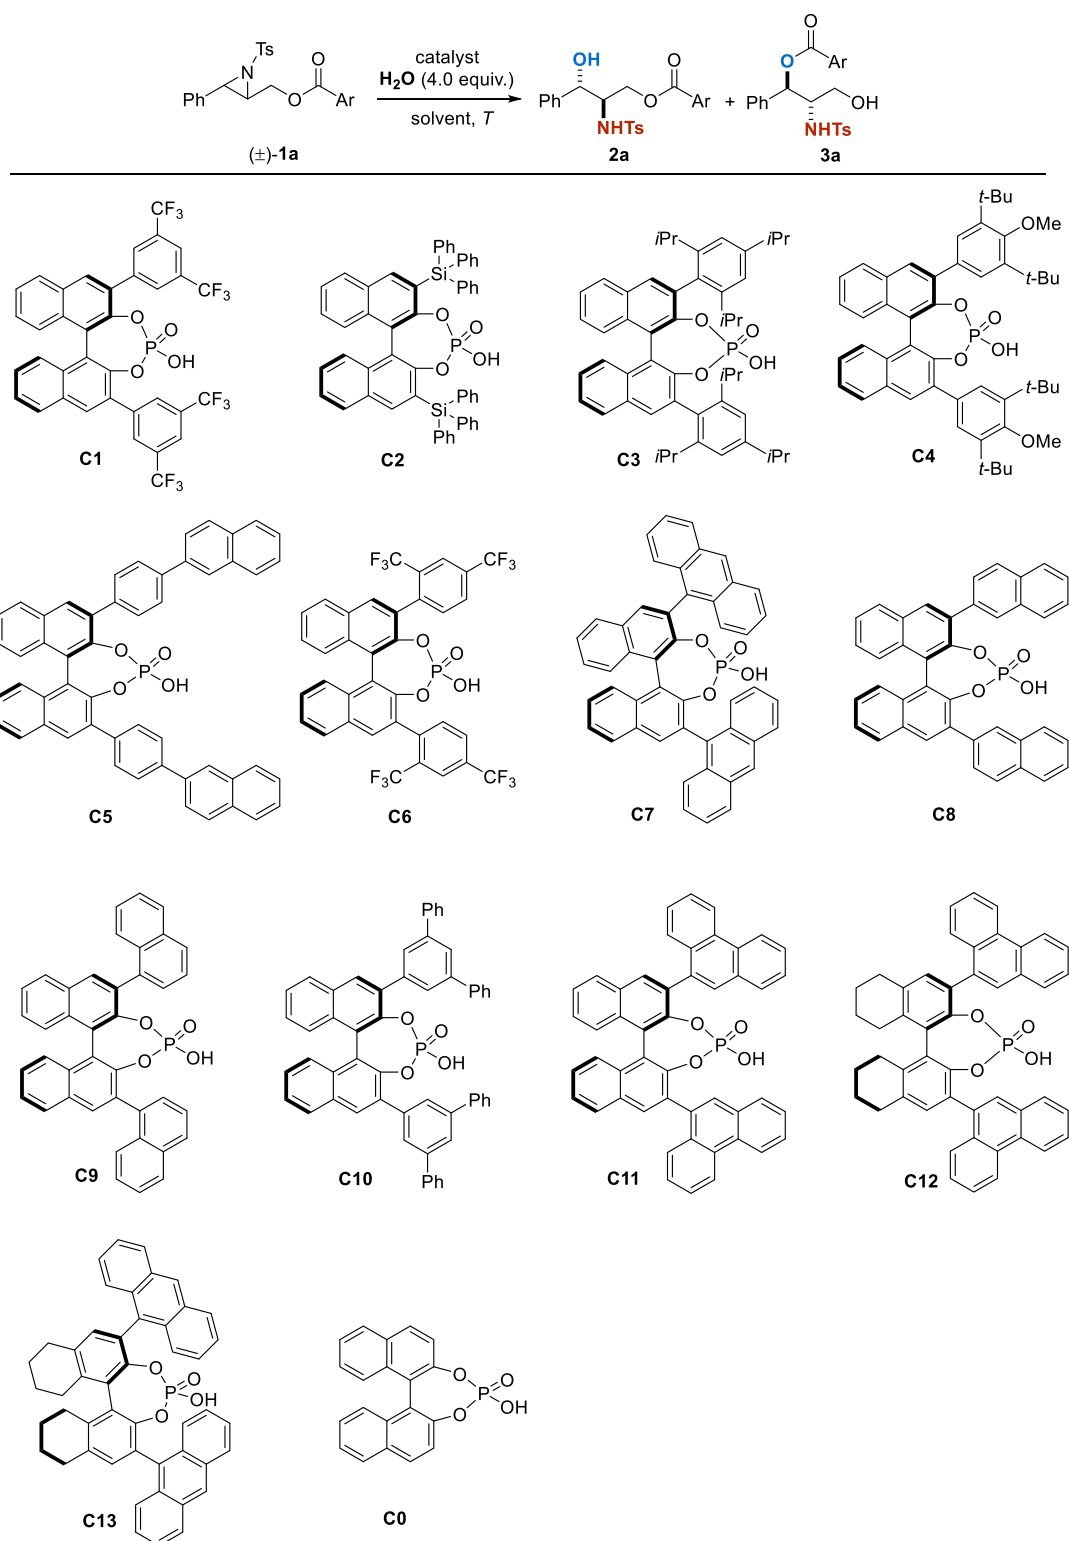

| entry           | cat.       | solv.                           | cat. (mol %) | <i>T</i> | <i>er</i> (%)<br>2 | <i>er</i> (%)<br>3 | time<br>(h) |
|-----------------|------------|---------------------------------|--------------|----------|--------------------|--------------------|-------------|
| 1               | <b>C1</b>  | CH <sub>2</sub> Cl <sub>2</sub> | 10           | rt       | 98:2               | 94:6               | 2           |
| 2               | <b>C2</b>  | CH <sub>2</sub> Cl <sub>2</sub> | 10           | rt       | 90:10              | 87.5:12.5          | 48          |
| 3               | <b>C3</b>  | CH <sub>2</sub> Cl <sub>2</sub> | 10           | rt       | 99:1               | 96:4               | 14          |
| 4               | <b>C4</b>  | CH <sub>2</sub> Cl <sub>2</sub> | 10           | rt       | 72:28              | 72.5:27.5          | 4           |
| 5               | <b>C5</b>  | CH <sub>2</sub> Cl <sub>2</sub> | 10           | rt       | 97:3               | 95:5               | 2           |
| 6               | <b>C7</b>  | CH <sub>2</sub> Cl <sub>2</sub> | 10           | rt       | 99:1               | >99.5:0.5          | 3           |
| 7               | <b>C8</b>  | CH <sub>2</sub> Cl <sub>2</sub> | 10           | rt       | 96:4               | 95.5:4.5           | 2           |
| 8               | <b>C9</b>  | CH <sub>2</sub> Cl <sub>2</sub> | 10           | rt       | 96:4               | >99.5:0.5          | 2           |
| 9               | <b>C10</b> | CH <sub>2</sub> Cl <sub>2</sub> | 10           | rt       | 97.5:2.5           | 97.5:2.5           | 2           |
| 10              | <b>C11</b> | CH <sub>2</sub> Cl <sub>2</sub> | 10           | rt       | 98.5:1.5           | >99.5:0.5          | 3           |
| 11              | <b>C12</b> | CH <sub>2</sub> Cl <sub>2</sub> | 10           | rt       | 98.5:1.5           | 99.5:0.5           | 4           |
| 12              | <b>C13</b> | CH <sub>2</sub> Cl <sub>2</sub> | 10           | rt       | 98.5:1.5           | >99.5:0.5          | 4           |
| 13              | <b>C7</b>  | CH <sub>2</sub> Cl <sub>2</sub> | 5            | rt       | 99:1               | >99.5:0.5          | 14          |
| 14              | <b>C7</b>  | CH <sub>2</sub> Cl <sub>2</sub> | 2            | rt       | n.d.               | n.d.               | >96         |
| 15              | <b>C7</b>  | CHCl <sub>3</sub>               | 5            | rt       | 97.5:2.5           | 99:1               | 12          |
| 16              | <b>C7</b>  | toluene                         | 5            | rt       | 97:3               | 98.5:1.5           | 16          |
| 17              | <b>C7</b>  | THF                             | 5            | rt       | 95.5:4.5           | 98:2               | >72         |
| 18              | <b>C7</b>  | Et <sub>2</sub> O               | 5            | rt       | 95:5               | 99:1               | >72         |
| 19              | <b>C7</b>  | Acetone                         | 5            | rt       | 95.5:4.5           | 95:5               | >72         |
| 20              | <b>C7</b>  | MeCN                            | 5            | rt       | 97.5:2.5           | 99:1               | 12          |
| 21              | <b>C7</b>  | EtOAc                           | 5            | rt       | 95:5               | 97:3               | >72         |
| 22              | <b>C7</b>  | 1,2-DCE                         | 5            | rt       | 99:1               | 98.5:1.5           | 12          |
| 23              | <b>C7</b>  | PhCl                            | 5            | rt       | 98.5:1.5           | 98:2               | 12          |
| 24              | <b>C7</b>  | xylene                          | 5            | rt       | 96.5:3.5           | 99:1               | 48          |
| 25              | <b>C7</b>  | CH <sub>2</sub> Cl <sub>2</sub> | 5            | 0 °C     | 98.5:1.5           | 99:1               | 20          |
| 26              | <b>C7</b>  | CH <sub>2</sub> Cl <sub>2</sub> | 5            | -20 °C   | n.d.               | n.d.               | >96         |
| 27 <sup>b</sup> | <b>C7</b>  | CH <sub>2</sub> Cl <sub>2</sub> | 5            | rt       | 98:2               | 99:1               | 12          |
| 28              | <b>C0</b>  | CH <sub>2</sub> Cl <sub>2</sub> | 10           | rt       | 50:50              | 50:50              | 6           |

[a] Unless otherwise noted, reactions were performed on a 0.05 mmol scale in 1 mL solvent for the indicated time; >95% conversion was achieved after the indicated time; *ers* were determined by HPLC. [b] Reaction was performed in 0.5 mL CH<sub>2</sub>Cl<sub>2</sub>; Ar = 3,5-(*t*Bu)<sub>2</sub>-4-MeO-C<sub>6</sub>H<sub>2</sub>

**Table S2.** Condition optimization for reaction with aliphatic aziridine as substrate. <sup>[a]</sup>

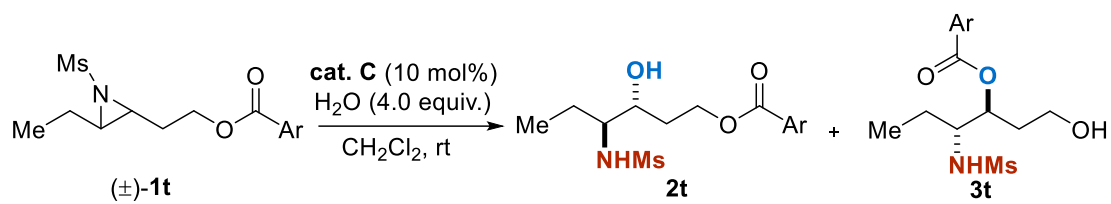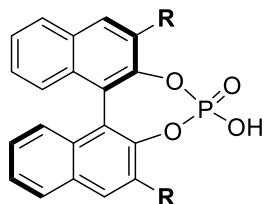

**C1**, R = 3,5-(CF<sub>3</sub>)<sub>2</sub>C<sub>6</sub>H<sub>3</sub>  
**C6**, R = 2,4-(CF<sub>3</sub>)<sub>2</sub>C<sub>6</sub>H<sub>3</sub>  
**C8**, R = 4-CF<sub>3</sub>C<sub>6</sub>F<sub>4</sub>  
**C9**, R = C<sub>6</sub>F<sub>5</sub>  
**C10**, R = 4-C<sub>6</sub>F<sub>5</sub>C<sub>6</sub>F<sub>4</sub>

| entry | cat.       | <i>er</i> (%)<br><b>2</b> | <i>er</i> (%)<br><b>3</b> | time<br>(h) |
|-------|------------|---------------------------|---------------------------|-------------|
| 1     | <b>C1</b>  | 87:13                     | 62.5:37.5                 | 14          |
| 2     | <b>C6</b>  | 95:5                      | 93:7                      | 16          |
| 3     | <b>C14</b> | 93.6:6.5                  | 86.5:13.5                 | 20          |
| 4     | <b>C15</b> | 96:4                      | 85:15                     | 24          |
| 5     | <b>C16</b> | 79:21                     | 74:26                     | 20          |
| 6     | <b>C0</b>  | 50:50                     | 50:50                     | 16          |

[a] Unless otherwise noted, reactions were performed on a 0.05 mmol scale in 1 mL CH<sub>2</sub>Cl<sub>2</sub> at rt for the indicated time; >95% conversion was achieved after the indicated time; *ers* were determined by HPLC; Ar = 3,5-(*t*-Bu)<sub>2</sub>-4-MeO-C<sub>6</sub>H<sub>2</sub>

## General Procedures and Characterization Data for Substrates

### General procedure A:

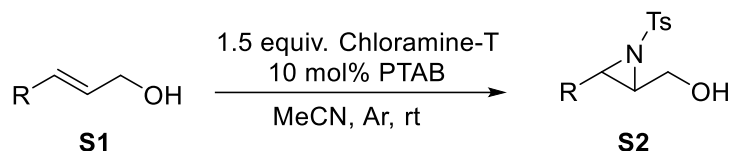

The aziridinol **S2** was prepared from allylic alcohol<sup>2</sup> **S1** according to literature<sup>3</sup>. Under Ar atmosphere, to a stirred suspension of chloramine-T (3.0 mmol, 1.5 equiv.) and phenyltrimethylammonium tribromide (PTAB) (0.2 mmol, 0.1 equiv.) in dry MeCN (10 mL) were added the allylic alcohol **S1** (2.0 mmol, 1.0 equiv.) at room temperature. The light yellow slurry was stirred overnight, filtered and concentrated under reduced pressure. The crude was purified by silica gel column chromatography (Petroleum ether / EtOAc = 5:1) to give aziridinol **S2**.

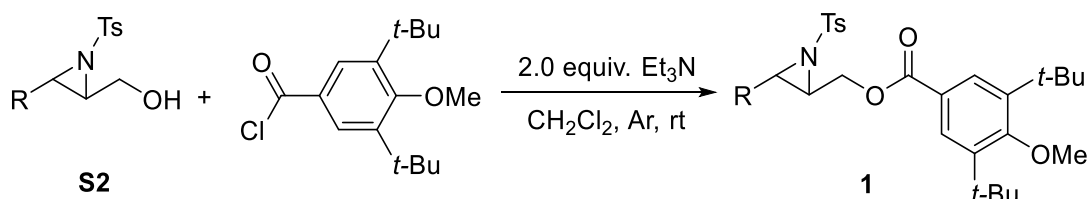

The aziridinol **S2** (1.40 mmol, 1.00 equiv.) was dissolved in anhydrous  $\text{CH}_2\text{Cl}_2$  (5 mL) under Ar atmosphere.  $\text{Et}_3\text{N}$  (2.80 mmol, 2.00 equiv.) and benzoyl chloride (1.47 mmol, 1.05 equiv.) were added sequentially at 0 °C. The reaction progress was monitored by TLC. After removal of solvent under reduced pressure, the crude was purified by silica gel column chromatography (Petroleum ether / EtOAc = 20:1) to afford the desired compound **1**.

### General procedure B:

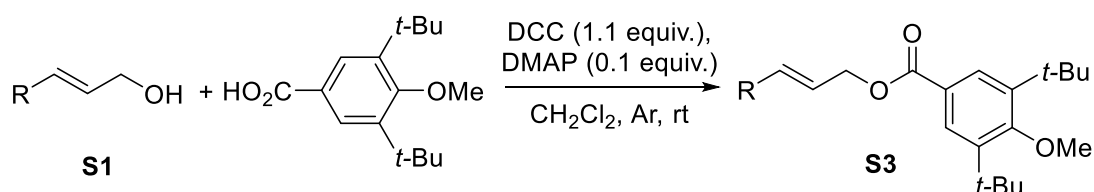

DCC (2.2 mmol, 1.10 equiv.), DMAP (0.2 mmol, 0.10 equiv.) and the acid (2.1 mmol,

1.05 equiv.) were dissolved in anhydrous  $\text{CH}_2\text{Cl}_2$  (10 mL) under Ar atmosphere at 0 °C. The mixture was stirred at 0 °C for 30 min. Then the corresponding alcohol **S1** (2.0 mmol, 1.00 equiv.) dissolved in anhydrous  $\text{CH}_2\text{Cl}_2$  (2 mL) was added dropwise to the suspension and the resulting mixture was stirred at rt. The reaction progress was monitored by TLC. After complete consumption of the alcohol, pentane (12 mL) was added to the reaction and the suspension was stirred for an additional 10 min. The reaction mixture was filtered and the filtrate was concentrated. The residue was purified by column chromatography directly to afford the desired ester **S3** (Petroleum ether / EtOAc = 50:1).

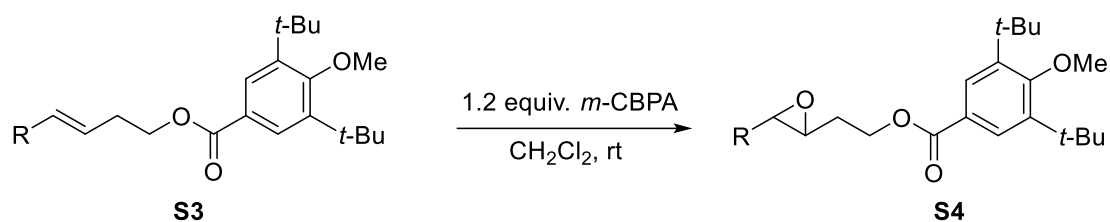

To a mixture of ester **S3** (2.0 mmol, 1.0 equiv.) in  $\text{CH}_2\text{Cl}_2$  (5 mL) was added *m*-CPBA (2.4 mmol, 1.2 equiv.) and the reaction was stirred at rt overnight. The reaction mixture was washed successively with saturated  $\text{Na}_2\text{S}_2\text{O}_3$  and saturated  $\text{NaHCO}_3$ . The organic layer was washed with water and brine, dried over sodium sulfate, and concentrated under reduced pressure. The crude was purified by silica gel column chromatography (Petroleum ether / EtOAc = 30:1) to give the desired compound **S4**.

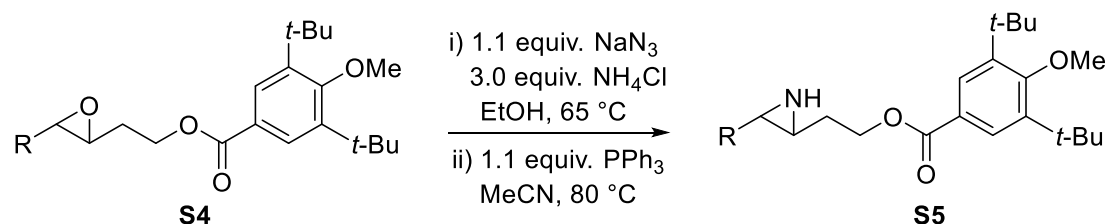

The corresponding epoxide **S4** (1.90 mmol, 1.0 equiv.) was dissolved in absolute ethanol (5 mL), then  $\text{NaN}_3$  (2.09 mmol, 1.1 equiv.) and  $\text{NH}_4\text{Cl}$  (5.70 mmol, 3.0 equiv.) were added and the resulting mixture was heated to 65 °C. The reaction was monitored by TLC and when it was deemed complete, the crude was diluted with ethyl acetate. The organic layer was washed with brine, dried over sodium sulfate, and concentrated under

reduced pressure. The crude was then dissolved in MeCN and heated gently to 40 °C. PPh<sub>3</sub> (2.09 mmol, 1.1 equiv.) was added slowly to ensure a smooth reaction and when the evolution of nitrogen ceased the solution was heated to 80 °C. The reaction progress was monitored by TLC. After removal of solvent under reduced pressure, the crude was purified by silica gel column chromatography (Petroleum ether / EtOAc = 10:1) to afford the desired aziridine **S5**.

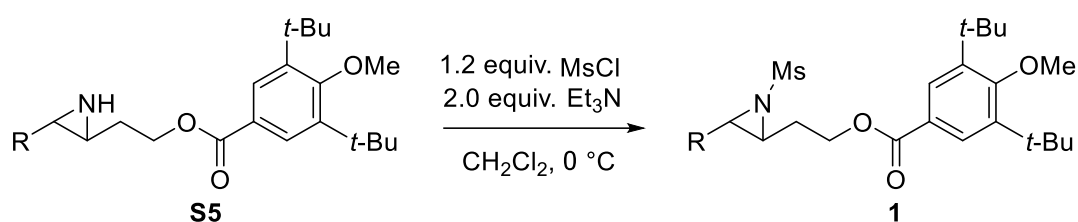

The aziridine **S5** (1.52 mmol, 1.0 equiv.) was dissolved in anhydrous CH<sub>2</sub>Cl<sub>2</sub> (5 mL). Et<sub>3</sub>N (3.04 mmol, 2.0 equiv.) and MsCl (1.82 mmol, 1.2 equiv.) were added sequentially at 0 °C. The reaction progress was monitored by TLC. After removal of solvent under reduced pressure, the crude was purified by silica gel column chromatography (Petroleum ether / EtOAc = 10:1) to afford the desired compound **1**.

#### 1a:

#### (3-phenyl-1-tosylaziridin-2-yl)methyl 3,5-di-tert-butyl-4-methoxybenzoate

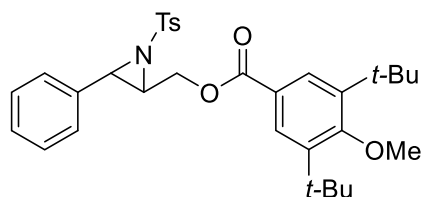

The title compound was synthesized according to **General Procedure A** and isolated by column chromatography (Petroleum ether / EtOAc = 20:1) in 85% yield. Viscous colorless oil; **<sup>1</sup>H NMR** (500 MHz, CDCl<sub>3</sub>): δ 8.00 (s, 2H), 7.84 (d, *J* = 8.1 Hz, 2H), 7.29 – 7.22 (m, 5H), 7.20 (dd, *J* = 6.7, 3.0 Hz, 2H), 4.98 (dd, *J* = 12.1, 6.2 Hz, 1H), 4.90 (dd, *J* = 12.1, 6.4 Hz, 1H), 4.06 (d, *J* = 4.1 Hz, 1H), 3.71 (s, 3H), 3.28 (td, *J* = 6.3, 4.1 Hz, 1H), 2.37 (s, 3H), 1.45 (s, 18H) ppm; **<sup>13</sup>C NMR** (126 MHz, CDCl<sub>3</sub>): δ 166.61, 164.34, 144.40, 144.30, 137.10, 134.35, 129.75, 128.75, 128.69, 128.56, 127.65, 126.92, 123.98, 64.59, 61.75, 49.28, 47.25, 36.05, 32.05, 21.74 ppm; **HRMS** (ESI): (*m/z*) calcd for C<sub>32</sub>H<sub>39</sub>NO<sub>5</sub>S [M+H]<sup>+</sup>: 550.2622, found: 550.2624; **IR**:  $\tilde{\nu}$  = 2961, 1717, 1597, 1455, 1409, 1363, 1325, 1295, 1225, 1185, 1161, 1132, 1117,



1089, 1005, 910, 888, 849, 814, 755, 711, 697, 687, 609, 593, 553, 540 cm<sup>-1</sup>.

**1b:**

**(3-(4-fluorophenyl)-1-tosylaziridin-2-yl)methyl 3,5-di-tert-butyl-4-methoxybenzoate**

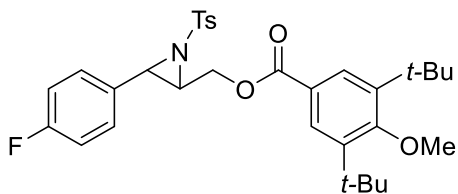

The title compound was synthesized according to

**General Procedure A** and isolated by column chromatography (Petroleum ether / EtOAc = 20:1)

in 77% yield. Viscous colorless oil; **<sup>1</sup>H NMR** (500

MHz, CDCl<sub>3</sub>): δ 7.99 (s, 2H), 7.83 (d, *J* = 8.1 Hz, 2H), 7.25 (d, *J* = 8.7 Hz, 2H), 7.21 – 7.14 (m, 2H), 6.96 (t, *J* = 8.6 Hz, 2H), 4.96 (dd, *J* = 12.1, 6.2 Hz, 1H), 4.86 (dd, *J* = 12.1, 6.3 Hz, 1H), 4.03 (d, *J* = 4.1 Hz, 1H), 3.71 (s, 3H), 3.26 (td, *J* = 6.2, 4.1 Hz, 1H), 2.38 (s, 3H), 1.45 (s, 18H) ppm; **<sup>13</sup>C NMR** (126 MHz, CDCl<sub>3</sub>): δ 166.60, 164.37, 162.86 (d, *J* = 247.5 Hz), 144.53, 144.32, 136.95, 130.04 (d, *J* = 3.3 Hz), 129.78, 128.72, 128.72 (d, *J* = 8.3 Hz), 127.62, 123.88, 115.70 (d, *J* = 21.7 Hz), 64.60, 61.69, 49.18, 46.65, 36.03, 32.03, 21.75 ppm; **<sup>19</sup>F NMR** (471 MHz, CDCl<sub>3</sub>): δ -113.06 ppm; **HRMS** (ESI): (*m/z*) calcd for C<sub>32</sub>H<sub>38</sub>FNO<sub>5</sub>S [M+H]<sup>+</sup>: 568.2528, found: 568.2528; **IR**:  $\tilde{\nu}$  = 2962, 1717, 1598, 1514, 1447, 1408, 1326, 1296, 1227, 1162, 1132, 1117, 1088, 1006, 913, 888, 842, 814, 767, 707, 687, 597, 541, 507, 419 cm<sup>-1</sup>.

**1c:**

**(3-(4-chlorophenyl)-1-tosylaziridin-2-yl)methyl 3,5-di-tert-butyl-4-methoxybenzoate**

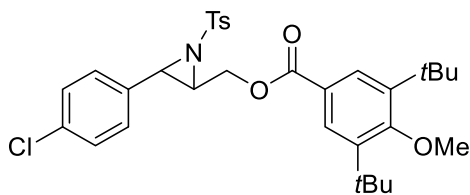

The title compound was synthesized according

to **General Procedure A** and isolated by column chromatography (Petroleum ether / EtOAc = 20:1)

in 80% yield. Viscous colorless oil; **<sup>1</sup>H NMR** (500

MHz, CDCl<sub>3</sub>): δ 7.98 (s, 2H), 7.83 (d, *J* = 8.0 Hz, 2H), 7.27 – 7.21 (m, 4H), 7.13 (d, *J* = 8.2 Hz, 2H), 4.97 (dd, *J* = 12.1, 6.2 Hz, 1H), 4.87 (dd, *J* = 12.1, 6.3 Hz, 1H), 4.02 (d, *J* = 4.1 Hz, 1H), 3.71 (s, 3H), 3.23 (td, *J* = 6.2, 4.0 Hz, 1H), 2.38 (s, 3H), 1.44 (s, 18H) ppm; **<sup>13</sup>C NMR** (126 MHz, CDCl<sub>3</sub>): δ 166.61, 164.40, 144.60, 144.34, 136.91, 134.50, 132.90, 129.81, 128.92, 128.74, 128.27, 127.63, 123.86, 64.61, 61.63, 49.35, 46.62, 36.05, 32.05, 21.77 ppm; **HRMS** (ESI): (*m/z*) calcd for C<sub>32</sub>H<sub>38</sub>ClNO<sub>5</sub>S [M+H]<sup>+</sup>: 584.2232, found:

584.2234; IR:  $\tilde{\nu}$  = 2959, 1716, 1645, 1597, 1495, 1449, 1405, 1363, 1326, 1296, 1225, 1161, 1132, 1117, 1088, 1007, 913, 889, 814, 756, 723, 708, 686, 665, 595, 554  $\text{cm}^{-1}$ .

**1d:**

**(3-(4-bromophenyl)-1-tosylaziridin-2-yl)methyl 3,5-di-tert-butyl-4-methoxybenzoate**

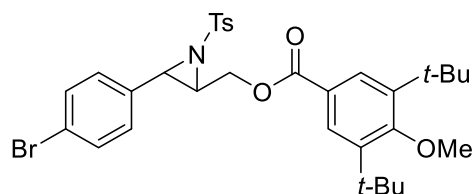

The title compound was synthesized according to **General Procedure A** and isolated by column chromatography (Petroleum ether / EtOAc = 20:1) in 82% yield. Viscous colorless oil; **<sup>1</sup>H NMR** (500

MHz,  $\text{CDCl}_3$ ):  $\delta$  7.99 (s, 2H), 7.83 (d,  $J$  = 8.2 Hz, 2H), 7.39 (d,  $J$  = 8.4 Hz, 2H), 7.28 – 7.23 (m, 2H), 7.10 – 7.04 (m, 2H), 4.97 (dd,  $J$  = 12.1, 6.2 Hz, 1H), 4.87 (dd,  $J$  = 12.1, 6.3 Hz, 1H), 4.01 (d,  $J$  = 4.1 Hz, 1H), 3.71 (s, 3H), 3.23 (td,  $J$  = 6.2, 4.1 Hz, 1H), 2.38 (s, 3H), 1.45 (s, 18H) ppm; **<sup>13</sup>C NMR** (126 MHz,  $\text{CDCl}_3$ ):  $\delta$  166.60, 164.39, 144.61, 144.33, 136.87, 133.44, 131.86, 129.82, 128.73, 128.55, 127.62, 123.84, 122.62, 64.60, 61.61, 49.34, 46.66, 36.04, 32.04, 21.77 ppm; **HRMS** (ESI): ( $m/z$ ) calcd for  $\text{C}_{32}\text{H}_{38}\text{BrNO}_5\text{S}$  [ $\text{M}+\text{H}$ ] $^+$ : 630.1707, found: 630.1722; IR:  $\tilde{\nu}$  = 2962, 1717, 1597, 1491, 1447, 1397, 1363, 1326, 1297, 1228, 1162, 1132, 1117, 1088, 1072, 1011, 913, 888, 814, 768, 720, 707, 687, 651, 595, 554  $\text{cm}^{-1}$ .

**1e:**

**(1-(methylsulfonyl)-3-(4-(trifluoromethyl)phenyl)aziridin-2-yl)methyl 3,5-di-tert-butyl-4-methoxybenzoate**

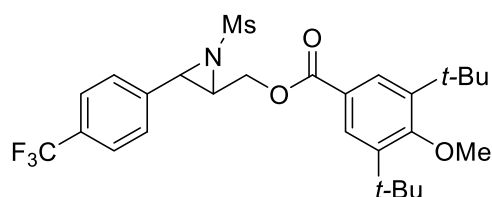

The title compound was synthesized according to **General Procedure A** and isolated by column chromatography (Petroleum ether / EtOAc = 10:1) in 75% yield. Viscous colorless

oil; **<sup>1</sup>H NMR** (500 MHz,  $\text{CDCl}_3$ ):  $\delta$  7.99 (s, 2H), 7.63 (d,  $J$  = 8.0 Hz, 2H), 7.47 (d,  $J$  = 7.9 Hz, 2H), 5.00 (dd,  $J$  = 12.2, 5.8 Hz, 1H), 4.81 (dd,  $J$  = 12.2, 6.8 Hz, 1H), 4.05 (d,  $J$  = 4.1 Hz, 1H), 3.71 (s, 3H), 3.26 (td,  $J$  = 6.3, 4.2 Hz, 1H), 3.19 (s, 3H), 1.44 (s, 18H) ppm; **<sup>13</sup>C NMR** (126 MHz,  $\text{CDCl}_3$ ):  $\delta$  166.48, 164.52, 144.46, 138.43, 131.09 (q,  $J$  = 32.6 Hz), 128.69, 127.22, 125.91 (q,  $J$  = 3.7 Hz), 123.97 (q,  $J$  = 271.9 Hz), 123.64, 64.61, 61.19, 49.69,

45.67, 42.06, 36.05, 32.02 ppm;  $^{19}\text{F}$  NMR (471 MHz,  $\text{CDCl}_3$ ):  $\delta$  -62.69 ppm; HRMS (ESI): ( $m/z$ ) calcd for  $\text{C}_{27}\text{H}_{34}\text{F}_3\text{NO}_5\text{S}$   $[\text{M}+\text{H}]^+$ : 542.2183, found: 542.2188; IR:  $\tilde{\nu}$  = 2964, 1718, 1622, 1448, 1409, 1363, 1324, 1298, 1228, 1156, 1128, 1068, 1007, 923, 887, 859, 785, 768, 678, 641, 599, 508  $\text{cm}^{-1}$ .

**1f:**

**(3-(p-tolyl)-1-tosylaziridin-2-yl)methyl 3,5-di-tert-butyl-4-methoxybenzoate**

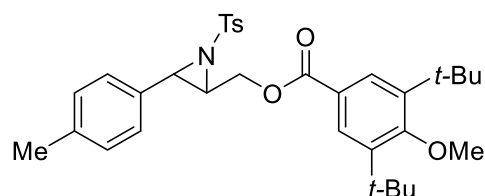

The title compound was synthesized according to **General Procedure A** and isolated by column chromatography (Petroleum ether / EtOAc = 20:1) in 70% yield. Viscous colorless oil;  $^1\text{H}$  NMR (500 MHz,  $\text{CDCl}_3$ ):  $\delta$  7.99 (s, 2H), 7.83 (d,  $J$  = 8.4 Hz, 2H), 7.24 (d,  $J$  = 8.0 Hz, 2H), 7.13 – 7.05 (m, 4H), 4.97 (dd,  $J$  = 12.1, 6.1 Hz, 1H), 4.87 (dd,  $J$  = 12.1, 6.5 Hz, 1H), 4.03 (d,  $J$  = 4.2 Hz, 1H), 3.71 (s, 3H), 3.30 (td,  $J$  = 6.3, 4.2 Hz, 1H), 2.37 (s, 3H), 2.30 (s, 3H), 1.45 (s, 18H) ppm;  $^{13}\text{C}$  NMR (126 MHz,  $\text{CDCl}_3$ ):  $\delta$  166.60, 164.30, 144.30, 144.26, 138.45, 137.17, 131.18, 129.71, 129.35, 128.74, 127.61, 126.91, 123.98, 64.58, 61.84, 49.03, 47.32, 36.03, 32.05, 21.73, 21.29 ppm; HRMS (ESI): ( $m/z$ ) calcd for  $\text{C}_{33}\text{H}_{41}\text{NO}_5\text{S}$   $[\text{M}+\text{H}]^+$ : 564.2778, found: 564.2782; IR:  $\tilde{\nu}$  = 2956, 2924, 2869, 1717, 1597, 1519, 1453, 1408, 1378, 1325, 1296, 1226, 1184, 1161, 1132, 1117, 1088, 1005, 913, 888, 814, 761, 708, 687, 596, 540  $\text{cm}^{-1}$ .

**1g:**

**(3-(3-fluorophenyl)-1-tosylaziridin-2-yl)methyl 3,5-di-tert-butyl-4-methoxybenzoate**

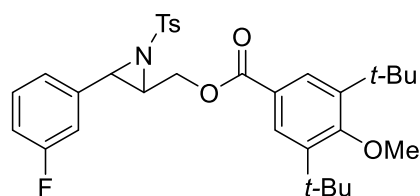

The title compound was synthesized according to **General Procedure A** and isolated by column chromatography (Petroleum ether / EtOAc = 20:1) in 88% yield. Viscous colorless oil;  $^1\text{H}$  NMR (500 MHz,  $\text{CDCl}_3$ ):  $\delta$  7.99 (s, 2H), 7.85 (d,  $J$  = 8.1 Hz, 2H), 7.32 – 7.15 (m, 3H), 7.01 (d,  $J$  = 7.7 Hz, 1H), 6.95 (td,  $J$  = 8.4, 2.6 Hz, 1H), 6.86 (dt,  $J$  = 9.6, 2.1 Hz, 1H), 4.98 (dd,  $J$  = 12.1, 6.3 Hz, 1H), 4.90 (dd,  $J$  = 12.1, 6.3 Hz, 1H), 4.05 (d,  $J$  = 4.1 Hz, 1H), 3.71 (s, 3H), 3.21 (td,  $J$  = 6.3, 4.0 Hz, 1H), 2.39 (s, 3H), 1.45 (s, 18H) ppm;  $^{13}\text{C}$  NMR (126 MHz,  $\text{CDCl}_3$ ):  $\delta$  166.59,

164.39, 162.97 (d,  $J = 246.9$  Hz), 144.64, 144.34, 137.09 (d,  $J = 7.8$  Hz), 136.85, 130.32 (d,  $J = 8.3$  Hz), 129.83, 128.74, 127.66, 123.87, 122.66 (d,  $J = 2.9$  Hz), 115.57 (d,  $J = 21.3$  Hz), 113.65 (d,  $J = 22.8$  Hz), 64.60, 61.50, 49.61, 46.46 (d,  $J = 2.3$  Hz), 36.04, 32.04, 21.76 ppm;  $^{19}\text{F}$  NMR (471 MHz,  $\text{CDCl}_3$ ):  $\delta$  -112.36 ppm; HRMS (ESI): ( $m/z$ ) calcd for  $\text{C}_{32}\text{H}_{38}\text{FNO}_5\text{S}$   $[\text{M}+\text{H}]^+$ : 568.2528, found: 568.2535; IR:  $\tilde{\nu} = 2962, 1717, 1616, 1594, 1452, 1409, 1327, 1296, 1227, 1185, 1162, 1137, 1117, 1089, 1006, 956, 924, 887, 815, 789, 768, 715, 696, 686, 605, 573, 552, 522$   $\text{cm}^{-1}$ .

**1h:**

**(3-(3-chlorophenyl)-1-tosylaziridin-2-yl)methyl 3,5-di-tert-butyl-4-methoxybenzoate**

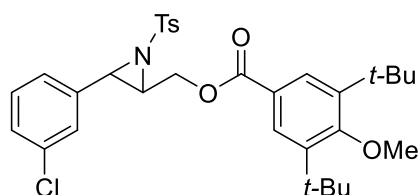

The title compound was synthesized according to **General Procedure A** and isolated by column chromatography (Petroleum ether / EtOAc = 20:1) in 81% yield. Viscous colorless oil;  $^1\text{H}$  NMR (500 MHz,  $\text{CDCl}_3$ ):  $\delta$  8.00 (s, 2H), 7.89 – 7.82 (m, 2H), 7.27 (d,  $J = 8.6$  Hz, 2H), 7.23 (dt,  $J = 8.0, 1.6$  Hz, 1H), 7.20 (t,  $J = 7.6$  Hz, 1H), 7.15 (t,  $J = 1.8$  Hz, 1H), 7.10 (dt,  $J = 7.3, 1.5$  Hz, 1H), 4.98 (dd,  $J = 12.1, 6.3$  Hz, 1H), 4.89 (dd,  $J = 12.1, 6.3$  Hz, 1H), 4.03 (d,  $J = 4.1$  Hz, 1H), 3.72 (s, 3H), 3.23 (td,  $J = 6.3, 4.1$  Hz, 1H), 2.39 (s, 3H), 1.45 (s, 18H) ppm;  $^{13}\text{C}$  NMR (126 MHz,  $\text{CDCl}_3$ ):  $\delta$  166.59, 164.39, 144.66, 144.34, 136.78, 136.54, 134.70, 129.99, 129.83, 128.76, 128.73, 127.68, 126.94, 125.11, 123.87, 64.59, 61.51, 49.43, 46.35, 36.03, 32.04, 21.75 ppm; HRMS (ESI): ( $m/z$ ) calcd for  $\text{C}_{32}\text{H}_{38}\text{ClNO}_5\text{S}$   $[\text{M}+\text{H}]^+$ : 584.2232, found: 584.2239; IR:  $\tilde{\nu} = 2961, 1716, 1598, 1574, 1447, 1408, 1364, 1325, 1295, 1224, 1185, 1160, 1131, 1116, 1088, 1004, 914, 887, 814, 787, 755, 716, 685, 595, 558, 519, 439$   $\text{cm}^{-1}$ .

**1i:**

**(3-(3-bromophenyl)-1-tosylaziridin-2-yl)methyl 3,5-di-tert-butyl-4-methoxybenzoate**

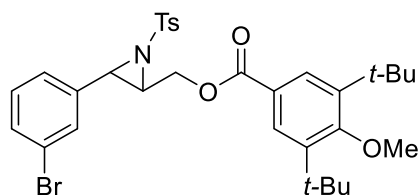

The title compound was synthesized according to **General Procedure A** and isolated by column chromatography (Petroleum ether / EtOAc = 20:1) in 83% yield. Viscous colorless oil;  $^1\text{H}$  NMR (500 MHz,  $\text{CDCl}_3$ ):  $\delta$  8.00 (s, 2H), 7.89 – 7.82 (m, 2H), 7.27 (d,  $J = 8.6$  Hz, 2H), 7.23 (dt,  $J = 8.0, 1.6$  Hz, 1H), 7.20 (t,  $J = 7.6$  Hz, 1H), 7.15 (t,  $J = 1.8$  Hz, 1H), 7.10 (dt,  $J = 7.3, 1.5$  Hz, 1H), 4.98 (dd,  $J = 12.1, 6.3$  Hz, 1H), 4.89 (dd,  $J = 12.1, 6.3$  Hz, 1H), 4.03 (d,  $J = 4.1$  Hz, 1H), 3.72 (s, 3H), 3.23 (td,  $J = 6.3, 4.1$  Hz, 1H), 2.39 (s, 3H), 1.45 (s, 18H) ppm;  $^{13}\text{C}$  NMR (126 MHz,  $\text{CDCl}_3$ ):  $\delta$  166.59, 164.39, 144.66, 144.34, 136.78, 136.54, 134.70, 129.99, 129.83, 128.76, 128.73, 127.68, 126.94, 125.11, 123.87, 64.59, 61.51, 49.43, 46.35, 36.03, 32.04, 21.75 ppm; HRMS (ESI): ( $m/z$ ) calcd for  $\text{C}_{32}\text{H}_{38}\text{BrNO}_5\text{S}$   $[\text{M}+\text{H}]^+$ : 598.1528, found: 598.1535; IR:  $\tilde{\nu} = 2961, 1716, 1598, 1574, 1447, 1408, 1364, 1325, 1295, 1224, 1185, 1160, 1131, 1116, 1088, 1004, 914, 887, 814, 787, 755, 716, 685, 595, 558, 519, 439$   $\text{cm}^{-1}$ .

CDCl<sub>3</sub>): δ 7.99 (s, 2H), 7.84 (d, *J* = 8.3 Hz, 2H), 7.38 (ddq, *J* = 6.0, 4.0, 1.9 Hz, 1H), 7.31 – 7.26 (m, 3H), 7.17 – 7.10 (m, 2H), 4.97 (dd, *J* = 12.1, 6.3 Hz, 1H), 4.89 (dd, *J* = 12.1, 6.3 Hz, 1H), 4.01 (d, *J* = 4.1 Hz, 1H), 3.71 (s, 3H), 3.22 (td, *J* = 6.3, 4.1 Hz, 1H), 2.39 (s, 3H), 1.45 (s, 18H) ppm; <sup>13</sup>C NMR (126 MHz, CDCl<sub>3</sub>): δ 166.60, 164.40, 144.70, 144.35, 136.77, 136.74, 131.70, 130.25, 129.88, 129.85, 128.75, 127.71, 125.58, 123.86, 122.79, 64.60, 61.51, 49.43, 46.26, 36.05, 32.05, 21.78 ppm; HRMS (ESI): (*m/z*) calcd for C<sub>32</sub>H<sub>38</sub>BrNO<sub>5</sub>S [M+H]<sup>+</sup>: 628.1727, found: 628.1726; IR:  $\tilde{\nu}$  = 2962, 1717, 1597, 1571, 1448, 1408, 1364, 1327, 1296, 1228, 1185, 1162, 1132, 1117, 1089, 914, 888, 814, 767, 715, 686, 595, 555 cm<sup>-1</sup>.

**1j:**

**(3-(3-methoxyphenyl)-1-tosylaziridin-2-yl)methyl 3,5-di-tert-butyl-4-methoxybenzoate**

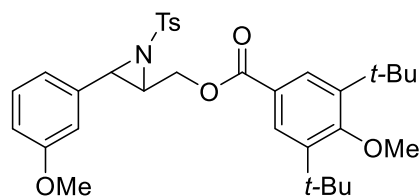

The title compound was synthesized according to **General Procedure A** and isolated by column chromatography (Petroleum ether / EtOAc = 10:1) in 82% yield. Viscous colorless oil; <sup>1</sup>H NMR (500 MHz, CDCl<sub>3</sub>): δ 8.03 (s, 2H), 7.90 – 7.84 (m, 2H), 7.28 – 7.23 (m, 2H), 7.18 (t, *J* = 7.9 Hz, 1H), 6.84 – 6.77 (m, 2H), 6.70 (dd, *J* = 2.5, 1.6 Hz, 1H), 5.03 (dd, *J* = 12.1, 6.1 Hz, 1H), 4.92 (dd, *J* = 12.1, 6.5 Hz, 1H), 4.06 (d, *J* = 4.2 Hz, 1H), 3.72 (s, 3H), 3.71 (s, 3H), 3.27 (td, *J* = 6.3, 4.1 Hz, 1H), 2.37 (s, 3H), 1.47 (s, 18H) ppm; <sup>13</sup>C NMR (126 MHz, CDCl<sub>3</sub>): δ 166.53, 164.27, 159.80, 144.36, 144.21, 137.03, 135.89, 129.69, 129.68, 128.69, 127.59, 123.92, 119.10, 114.30, 111.92, 64.52, 61.61, 55.19, 49.36, 47.07, 35.96, 31.99, 21.64 ppm; HRMS (ESI): (*m/z*) calcd for C<sub>33</sub>H<sub>41</sub>NO<sub>6</sub>S [M+H]<sup>+</sup>: 580.2728, found: 580.2732; IR:  $\tilde{\nu}$  = 2960, 1717, 1597, 1494, 1457, 1409, 1325, 1295, 1226, 1161, 1132, 1117, 1088, 1046, 1005, 924, 887, 814, 754, 714, 696, 686, 605, 551, 528 cm<sup>-1</sup>.

**1k:**

**(3-(*m*-tolyl)-1-tosylaziridin-2-yl)methyl 3,5-di-tert-butyl-4-methoxybenzoate**

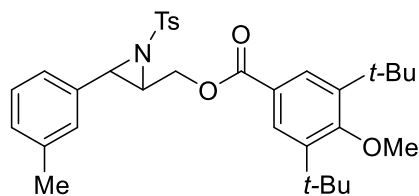

The title compound was synthesized according to **General Procedure A** and isolated by column chromatography (Petroleum ether / EtOAc = 20:1) in 80% yield. Viscous colorless oil; **<sup>1</sup>H NMR** (500 MHz, CDCl<sub>3</sub>):

δ 8.00 (s, 2H), 7.85 (d, *J* = 8.4 Hz, 2H), 7.28 – 7.22 (m, 2H), 7.16 (t, *J* = 7.8 Hz, 1H), 7.07 (d, *J* = 7.6 Hz, 1H), 7.00 (dd, *J* = 4.6, 2.1 Hz, 2H), 4.97 (dd, *J* = 12.1, 6.2 Hz, 1H), 4.90 (dd, *J* = 12.1, 6.5 Hz, 1H), 4.03 (d, *J* = 4.2 Hz, 1H), 3.72 (s, 3H), 3.28 (td, *J* = 6.3, 4.2 Hz, 1H), 2.38 (s, 3H), 2.28 (s, 3H), 1.45 (s, 18H) ppm; **<sup>13</sup>C NMR** (126 MHz, CDCl<sub>3</sub>) δ 166.62, 164.33, 144.37, 144.29, 138.42, 137.08, 134.22, 129.73, 129.34, 128.75, 128.59, 127.69, 127.63, 123.98, 64.60, 61.76, 49.17, 47.22, 36.04, 32.06, 21.74, 21.43 ppm; **HRMS** (ESI): (*m/z*) calcd for C<sub>33</sub>H<sub>41</sub>NO<sub>5</sub>S [M+H]<sup>+</sup>: 564.2778, found: 564.2785; **IR**:  $\tilde{\nu}$  = 2961, 1718, 1597, 1449, 1408, 1363, 1325, 1296, 1227, 1185, 1161, 1132, 1117, 1088, 1006, 924, 887, 814, 788, 768, 714, 698, 687, 596, 556, 438 cm<sup>-1</sup>.

**1l:**

**(3-(2-fluorophenyl)-1-tosylaziridin-2-yl)methyl 3,5-di-tert-butyl-4-methoxybenzoate**

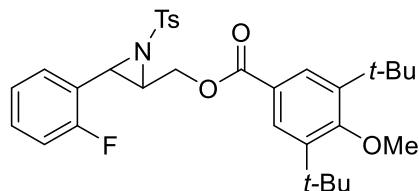

The title compound was synthesized according to **General Procedure A** and isolated by column chromatography (Petroleum ether / EtOAc = 20:1) in 83% yield. Viscous colorless oil; **<sup>1</sup>H NMR** (500 MHz, CDCl<sub>3</sub>)

δ 8.01 (s, 2H), 7.86 (d, *J* = 8.3 Hz, 2H), 7.30 – 7.21 (m, 3H), 7.02 (dddd, *J* = 11.3, 7.1, 6.0, 1.4 Hz, 3H), 4.99 – 4.87 (m, 2H), 4.21 (d, *J* = 4.2 Hz, 1H), 3.72 (s, 3H), 3.35 (td, *J* = 6.3, 4.2 Hz, 1H), 2.39 (s, 3H), 1.45 (s, 18H) ppm; **<sup>13</sup>C NMR** (126 MHz, CDCl<sub>3</sub>): δ 166.56, 164.31, 161.70 (d, *J* = 248.4 Hz), 144.56, 144.27, 136.81, 130.20 (d, *J* = 8.1 Hz), 129.76, 128.77, 127.96 (d, *J* = 3.2 Hz), 127.77, 124.36 (d, *J* = 3.8 Hz), 123.95, 121.68 (d, *J* = 13.5 Hz), 115.47 (d, *J* = 20.6 Hz), 64.58, 61.64, 48.12, 41.72 (d, *J* = 5.0 Hz), 36.03, 32.04, 21.76 ppm; **<sup>19</sup>F NMR** (471 MHz, CDCl<sub>3</sub>): δ -118.07 ppm; **HRMS** (ESI): (*m/z*) calcd for C<sub>32</sub>H<sub>38</sub>FNO<sub>5</sub>S [M+H]<sup>+</sup>: 568.2528, found: 568.2529; **IR**:  $\tilde{\nu}$  = 2961, 1718, 1597, 1496, 1457, 1410, 1328, 1296, 1226, 1185, 1162, 1132, 1117, 1088, 1005, 914, 888, 815, 757, 709, 687, 594, 557 cm<sup>-1</sup>.

**1m:**

**(3-(2-chlorophenyl)-1-(methylsulfonyl)aziridin-2-yl)methyl 3,5-di-tert-butyl-4-methoxybenzoate**

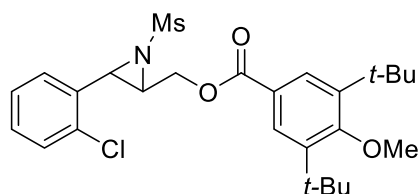

The title compound was synthesized according to **General Procedure A** and isolated by column chromatography (Petroleum ether / EtOAc = 10:1) in 87% yield. Viscous colorless oil; **<sup>1</sup>H NMR** (500 MHz,

CDCl<sub>3</sub>) δ 8.01 (s, 2H), 7.43 – 7.37 (m, 1H), 7.40 – 7.33 (m, 1H), 7.36 – 7.26 (m, 2H), 5.01 (dd, *J* = 12.2, 5.5 Hz, 1H), 4.90 (dd, *J* = 12.3, 7.3 Hz, 1H), 4.26 (d, *J* = 4.3 Hz, 1H), 3.71 (s, 3H), 3.26 – 3.23 (m, 1H), 3.24 (s, 3H), 1.44 (s, 18H) ppm; **<sup>13</sup>C NMR** (126 MHz, CDCl<sub>3</sub>): δ 166.43, 164.41, 144.39, 134.31, 132.35, 129.94, 129.61, 128.72, 127.64, 127.33, 123.81, 64.58, 61.26, 48.66, 44.01, 41.90, 36.04, 32.04 ppm; **HRMS** (ESI): (*m/z*) calcd for C<sub>26</sub>H<sub>34</sub>ClNO<sub>5</sub>S [M+H]<sup>+</sup>: 508.1919, found: 508.1918; **IR**:  $\tilde{\nu}$  = 2957, 2925, 2870, 1719, 1569, 1446, 1410, 1378, 1325, 1297, 1227, 1156, 1132, 1055, 1006, 968, 924, 888, 854, 786, 756, 665, 595, 512 cm<sup>-1</sup>.

**1n:**

**(3-(2-bromophenyl)-1-(methylsulfonyl)aziridin-2-yl)methyl 3,5-di-tert-butyl-4-methoxybenzoate**

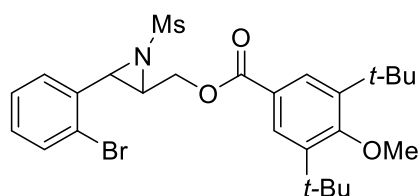

The title compound was synthesized according to **General Procedure A** and isolated by column chromatography (Petroleum ether / EtOAc = 10:1) in 81% yield. Viscous colorless oil; **<sup>1</sup>H NMR** (500 MHz,

CDCl<sub>3</sub>): δ 8.01 (s, 2H), 7.58 (dd, *J* = 8.0, 1.2 Hz, 1H), 7.38 – 7.28 (m, 2H), 7.21 (td, *J* = 7.6, 2.0 Hz, 1H), 5.05 (dd, *J* = 12.3, 5.3 Hz, 1H), 4.90 (dd, *J* = 12.3, 7.6 Hz, 1H), 4.22 (d, *J* = 4.2 Hz, 1H), 3.71 (s, 3H), 3.26 (s, 3H), 3.21 (dt, *J* = 7.6, 4.8 Hz, 1H), 1.44 (s, 18H) ppm; **<sup>13</sup>C NMR** (101 MHz, CDCl<sub>3</sub>) δ 166.42, 164.41, 144.39, 134.06, 132.80, 130.19, 128.73, 127.93, 127.86, 123.81, 64.61, 61.25, 49.10, 46.01, 41.88, 36.06, 32.06 ppm; **HRMS** (ESI): (*m/z*) calcd for C<sub>26</sub>H<sub>34</sub>BrNO<sub>5</sub>S [M+H]<sup>+</sup>: 554.1394, found: 554.1406; **IR**:  $\tilde{\nu}$  = 2962, 1719, 1596, 1443, 1410, 1363, 1324, 1297, 1227, 1155, 1131, 1047, 1027, 1006, 968, 919, 888, 785, 755, 679, 660, 594, 511 cm<sup>-1</sup>.

**1o:**

**(1-(methylsulfonyl)-3-(o-tolyl)aziridin-2-yl)methyl 3,5-di-tert-butyl-4-methoxybenzoate**

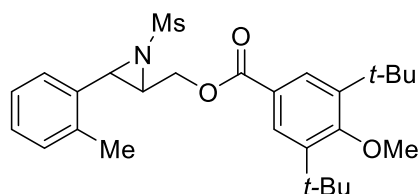

The title compound was synthesized according to **General Procedure A** and isolated by column chromatography (Petroleum ether / EtOAc = 10:1) in 83% yield. Viscous colorless oil; **<sup>1</sup>H NMR** (500 MHz,

CDCl<sub>3</sub>): δ 8.00 (s, 2H), 7.31 – 7.15 (m, 4H), 4.93 (qd, *J* = 12.1, 6.4 Hz, 2H), 4.07 (d, *J* = 4.4 Hz, 1H), 3.72 (s, 3H), 3.25 – 3.18 (m, 1H), 3.23 (s, 3H), 2.47 (s, 3H), 1.45 (s, 18H) ppm; **<sup>13</sup>C NMR** (126 MHz, CDCl<sub>3</sub>): δ 166.37, 164.42, 144.41, 137.06, 132.44, 130.35, 128.66, 128.62, 126.44, 125.58, 123.77, 64.59, 61.51, 48.58, 45.04, 42.08, 36.04, 32.03, 19.33 ppm; **HRMS** (ESI): (*m/z*) calcd for C<sub>27</sub>H<sub>37</sub>NO<sub>5</sub>S [M+H]<sup>+</sup>: 488.2465, found: 488.2476; **IR**:  $\tilde{\nu}$  = 2962, 1718, 1596, 1462, 1410, 1363, 1322, 1297, 1227, 1154, 1130, 1005, 968, 923, 888, 856, 787, 753, 671, 596, 511, 446, 418 cm<sup>-1</sup>.

**1p:**

**(3-(naphthalen-1-yl)-1-tosylaziridin-2-yl)methyl 3,5-di-tert-butyl-4-methoxybenzoate**

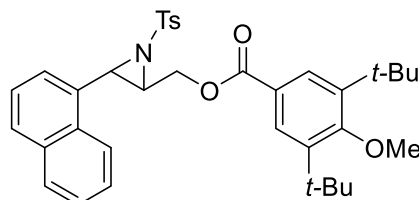

The title compound was synthesized according to **General Procedure A** and isolated by column chromatography (Petroleum ether / EtOAc = 20:1) in 80% yield. Viscous colorless oil; **<sup>1</sup>H NMR** (500 MHz,

CDCl<sub>3</sub>): δ 8.10 (d, *J* = 8.4 Hz, 1H), 8.03 (s, 2H), 7.87 (d, *J* = 7.9 Hz, 2H), 7.84 (d, *J* = 8.2 Hz, 1H), 7.76 (d, *J* = 8.2 Hz, 1H), 7.50 – 7.44 (m, 1H), 7.38 (ddd, *J* = 8.1, 6.8, 1.3 Hz, 1H), 7.33 – 7.23 (m, 3H), 7.17 (d, *J* = 7.1 Hz, 1H), 5.11 (qd, *J* = 12.0, 6.4 Hz, 2H), 4.60 (d, *J* = 4.3 Hz, 1H), 3.72 (s, 3H), 3.36 (td, *J* = 6.3, 4.2 Hz, 1H), 2.40 (s, 3H), 1.45 (s, 18H) ppm; **<sup>13</sup>C NMR** (126 MHz, CDCl<sub>3</sub>): δ 166.60, 164.37, 144.58, 144.31, 136.78, 133.36, 131.75, 130.14, 129.77, 128.92, 128.76, 127.88, 126.76, 126.13, 125.39, 124.16, 123.93, 123.13, 64.61, 61.87, 48.22, 46.01, 36.04, 32.05, 21.77 ppm; **HRMS** (ESI): (*m/z*) calcd for C<sub>36</sub>H<sub>41</sub>NO<sub>5</sub>S [M+Na]<sup>+</sup>: 622.2597, found: 622.2622; **IR**:  $\tilde{\nu}$  = 2961, 1717, 1597, 1512, 1449, 1449, 1396, 1364, 1331, 1296, 1227, 1185, 1161, 1131, 1117, 1088, 1005, 911, 888, 801, 778, 768, 711, 688, 593, 559, 509 cm<sup>-1</sup>.



**1q:**

**(3-(naphthalen-2-yl)-1-tosylaziridin-2-yl)methyl 3,5-di-tert-butyl-4-methoxybenzoate**

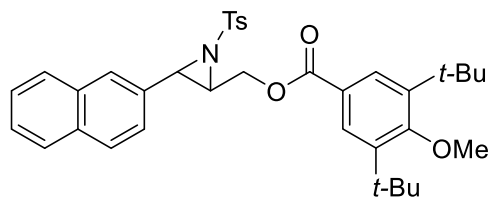

The title compound was synthesized according to **General Procedure A** and isolated by column chromatography (Petroleum ether / EtOAc = 20:1) in 78% yield. Viscous colorless

oil; **<sup>1</sup>H NMR** (500 MHz, CDCl<sub>3</sub>): δ 8.02 (s, 2H), 7.86 (d, *J* = 8.0 Hz, 2H), 7.80 (s, 1H), 7.75 (t, *J* = 7.7 Hz, 2H), 7.69 (s, 1H), 7.50 – 7.43 (m, 2H), 7.32 – 7.25 (m, 1H), 7.23 (d, *J* = 8.0 Hz, 2H), 5.06 (dd, *J* = 12.1, 6.1 Hz, 1H), 4.95 (dd, *J* = 12.1, 6.4 Hz, 1H), 4.22 (d, *J* = 4.1 Hz, 1H), 3.71 (s, 3H), 3.40 (td, *J* = 6.2, 4.0 Hz, 1H), 2.35 (s, 3H), 1.46 (s, 18H) ppm; **<sup>13</sup>C NMR** (126 MHz, CDCl<sub>3</sub>): <sup>13</sup>C NMR (126 MHz, CDCl<sub>3</sub>) δ 166.64, 164.33, 144.43, 144.27, 137.02, 133.32, 133.09, 131.72, 129.75, 128.76, 128.59, 127.94, 127.83, 127.64, 126.59, 126.51, 124.04, 123.94, 64.59, 61.78, 49.40, 47.47, 36.03, 32.05, 21.72 ppm; **HRMS** (ESI): (*m/z*) calcd for C<sub>36</sub>H<sub>41</sub>NO<sub>5</sub>S [M+Na]<sup>+</sup>: 622.2597, found: 622.2628; **IR**:  $\tilde{\nu}$  = 2960, 1717, 1597, 1449, 1409, 1393, 1363, 1329, 1296, 1228, 1185, 1161, 1132, 1088, 1005, 961, 917, 859, 815, 755, 712, 688, 623, 595, 554, 477 cm<sup>-1</sup>.

**1r:**

**(3-([1,1'-biphenyl]-4-yl)-1-tosylaziridin-2-yl)methyl 3,5-di-tert-butyl-4-methoxybenzoate**

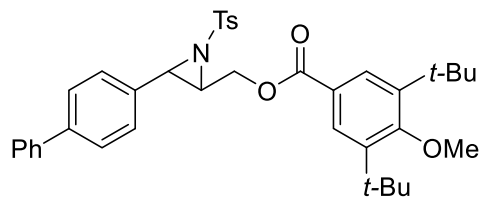

The title compound was synthesized according to **General Procedure A** and isolated by column chromatography (Petroleum ether / EtOAc = 20:1) in 72% yield. Viscous colorless oil; **<sup>1</sup>H**

**NMR** (500 MHz, CDCl<sub>3</sub>): δ 8.02 (s, 2H), 7.87 (d, *J* = 8.3 Hz, 2H), 7.57 – 7.47 (m, 4H), 7.42 (dd, *J* = 8.4, 6.9 Hz, 2H), 7.38 – 7.31 (m, 1H), 7.31 – 7.23 (m, 4H), 5.02 (dd, *J* = 12.1, 6.2 Hz, 1H), 4.93 (dd, *J* = 12.1, 6.4 Hz, 1H), 4.12 (d, *J* = 4.2 Hz, 1H), 3.72 (s, 3H), 3.34 (td, *J* = 6.2, 4.2 Hz, 1H), 2.38 (s, 3H), 1.46 (s, 18H) ppm; **<sup>13</sup>C NMR** (126 MHz, CDCl<sub>3</sub>): δ 166.62, 164.35, 144.42, 144.30, 141.54, 140.52, 137.10, 133.30, 129.77, 128.94, 128.75, 127.66, 127.40, 127.39, 127.15, 127.14, 123.97, 64.58, 61.77, 49.28, 47.11, 36.04, 32.05, 21.74 ppm; **HRMS** (ESI): (*m/z*) calcd for C<sub>38</sub>H<sub>43</sub>NO<sub>5</sub>S [M+Na]<sup>+</sup>:

648.2754, found: 648.2775; **IR**:  $\tilde{\nu}$  = 3359, 2958, 2921, 2852, 1718, 1658, 1633, 1597, 1488, 1470, 1408, 1326, 1296, 1230, 1162, 1132, 1088, 1007, 913, 843, 814, 765, 736, 709, 697, 595  $\text{cm}^{-1}$ .

**1s:**

**(1-(methylsulfonyl)-1a,6-dihydroindeno[1,2-b]azirin-6a(1H)-yl)methyl 3,5-di-tert-butyl-4-methoxybenzoate**

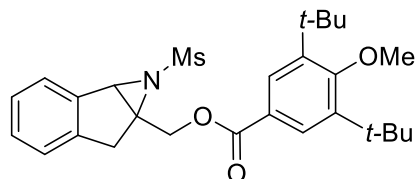

The title compound was synthesized according to **General Procedure A** and isolated by column chromatography (Petroleum ether / EtOAc = 10:1) in 70% yield. Viscous colorless oil; **<sup>1</sup>H NMR** (500 MHz,  $\text{CDCl}_3$ ):  $\delta$  8.02 (s, 2H), 7.53 – 7.48 (m, 1H), 7.34 – 7.27 (m, 1H), 7.27 – 7.18 (m, 2H),

5.23 (d,  $J$  = 12.4 Hz, 1H), 4.99 (d,  $J$  = 12.4 Hz, 1H), 4.41 (s, 1H), 3.72 (s, 3H), 3.52 (d,  $J$  = 17.8 Hz, 1H), 3.34 (d,  $J$  = 17.8 Hz, 1H), 3.13 (s, 3H), 1.44 (s, 18H) ppm; **<sup>13</sup>C NMR** (126 MHz,  $\text{CDCl}_3$ ):  $\delta$  166.44, 164.39, 144.35, 143.49, 138.23, 129.08, 128.69, 126.93, 125.76, 125.04, 123.79, 64.58, 62.56, 57.71, 53.95, 42.48, 38.35, 36.00, 31.98 ppm; **HRMS** (ESI): ( $m/z$ ) calcd for  $\text{C}_{27}\text{H}_{35}\text{NO}_5\text{S}$  [ $\text{M}+\text{Na}$ ] $^+$ : 508.2128, found: 508.2152; **IR**:  $\tilde{\nu}$  = 2963, 1717, 1596, 1477, 1407, 1363, 1320, 1297, 1227, 1146, 1006, 964, 886, 863, 782, 769, 735, 671, 609, 529, 512  $\text{cm}^{-1}$ .

**1t:**

**2-(3-ethyl-1-(methylsulfonyl)aziridin-2-yl)ethyl 3,5-di-tert-butyl-4-methoxybenzoate**

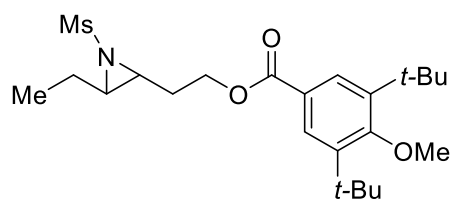

The title compound was synthesized according to **General Procedure B** and isolated by column chromatography (Petroleum ether / EtOAc = 10:1) in 90% yield. Viscous colorless oil; **<sup>1</sup>H NMR** (500

MHz,  $\text{CDCl}_3$ ):  $\delta$  7.93 (s, 2H), 4.50 – 4.40 (m, 2H), 3.70 (s, 3H), 3.10 (s, 3H), 2.77 (ddd,  $J$  = 7.3, 5.8, 4.5 Hz, 1H), 2.69 (td,  $J$  = 6.4, 4.5 Hz, 1H), 2.30 (dq,  $J$  = 16.3, 5.5 Hz, 1H), 2.26 – 2.14 (m, 1H), 1.76 (pd,  $J$  = 7.2, 3.5 Hz, 2H), 1.44 (s, 18H), 1.04 (t,  $J$  = 7.5 Hz, 3H) ppm; **<sup>13</sup>C NMR** (126 MHz,  $\text{CDCl}_3$ ):  $\delta$  166.81, 164.20, 144.29, 128.35, 124.19, 64.54, 62.42, 50.53, 46.23, 42.37, 35.97, 32.00, 29.49, 23.44, 11.71 ppm; **HRMS** (ESI): ( $m/z$ ) calcd for

C<sub>23</sub>H<sub>37</sub>NO<sub>5</sub>S [M+H]<sup>+</sup>: 440.2465, found: 440.2473; IR:  $\tilde{\nu}$  = 2962, 1715, 1596, 1455, 1410, 1393, 1363, 1301, 1225, 1145, 1116, 1005, 967, 937, 887, 786, 770, 678, 598, 513, 420, 407 cm<sup>-1</sup>.

**1u:**

**2-(1-(methylsulfonyl)-3-propylaziridin-2-yl)ethyl 3,5-di-tert-butyl-4-methoxybenzoate**

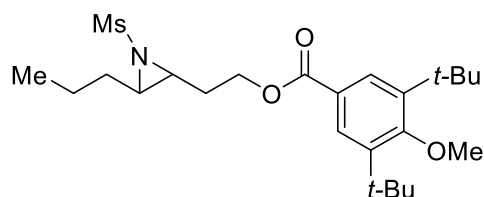

The title compound was synthesized according to **General Procedure B** and isolated by column chromatography (Petroleum ether / EtOAc = 10:1) in 89% yield. Viscous colorless oil; **<sup>1</sup>H NMR** (500 MHz, CDCl<sub>3</sub>):  $\delta$  7.94 (s, 2H), 4.46 (dd,  $J$  = 6.8, 5.4 Hz, 2H), 3.71 (s, 3H), 3.09 (s, 3H), 2.82 – 2.75 (m, 1H), 2.71 (td,  $J$  = 6.5, 4.5 Hz, 1H), 2.32 – 2.16 (m, 2H), 1.78 (ddt,  $J$  = 15.1, 9.5, 5.8 Hz, 1H), 1.66 (ddt,  $J$  = 13.7, 9.2, 6.7 Hz, 1H), 1.55-1.38 (m, 2 H), 1.44 (s, 18H), 0.93 (t,  $J$  = 7.4 Hz, 3H) ppm; **<sup>13</sup>C NMR** (126 MHz, CDCl<sub>3</sub>):  $\delta$  166.86, 164.24, 144.32, 128.39, 124.21, 64.59, 62.39, 49.19, 46.43, 42.42, 36.01, 32.06, 32.02, 29.59, 20.87, 13.85 ppm; **HRMS** (ESI): ( $m/z$ ) calcd for C<sub>24</sub>H<sub>39</sub>NO<sub>5</sub>S [M+H]<sup>+</sup>: 454.2622, found: 454.2643; IR:  $\tilde{\nu}$  = 2961, 2873, 1717, 1596, 1466, 1411, 1393, 1315, 1301, 1233, 1146, 1117, 1007, 927, 888, 787, 770, 678, 594 cm<sup>-1</sup>.

**1v:**

**2-(3-isopropyl-1-(methylsulfonyl)aziridin-2-yl)ethyl 3,5-di-tert-butyl-4-methoxybenzoate**

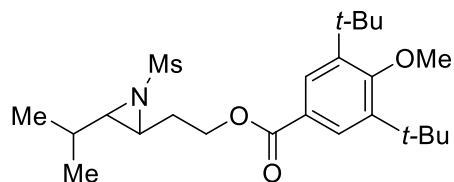

The title compound was synthesized according to **General Procedure B** and isolated by column chromatography (Petroleum ether / EtOAc = 10:1) in 88% yield. Viscous colorless oil; **<sup>1</sup>H NMR** (500 MHz, CDCl<sub>3</sub>):  $\delta$  7.94 (s, 2H), 4.55 – 4.37 (m, 2H), 3.71 (s, 3H), 3.11 (s, 3H), 2.76 (dt,  $J$  = 8.1, 5.0 Hz, 1H), 2.60 (dd,  $J$  = 8.0, 4.6 Hz, 1H), 2.54 – 2.43 (m, 1H), 2.32 – 2.24 (m, 1H), 1.76 – 1.62 (m, 1H), 1.44 (s, 18H), 1.07 (d,  $J$  = 6.7 Hz, 3H), 0.98 (d,  $J$  = 6.9 Hz, 3H) ppm; **<sup>13</sup>C NMR** (126 MHz, CDCl<sub>3</sub>):  $\delta$  166.89, 164.23, 144.31, 128.44, 124.26, 64.59, 62.80,

54.60, 46.12, 42.43, 36.03, 32.05, 29.95, 28.71, 20.24, 19.83 ppm; **HRMS** (ESI): ( $m/z$ ) calcd for  $C_{24}H_{39}NO_5S$   $[M+H]^+$ : 454.2622, found: 454.2632; **IR**:  $\tilde{\nu}$  = 2961, 2872, 1716, 1596, 1468, 1410, 1392, 1364, 1301, 1233, 1147, 1006, 967, 888, 785, 770, 678, 602, 516  $cm^{-1}$ .

**1w:**

**2-(3-benzyl-1-(methylsulfonyl)aziridin-2-yl)ethyl 3,5-di-tert-butyl-4-methoxybenzoate**

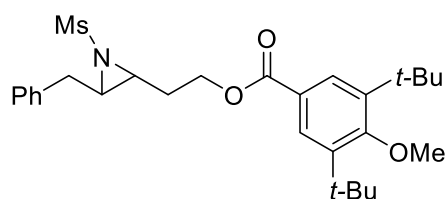

The title compound was synthesized according to **General Procedure B** and isolated by column chromatography (Petroleum ether / EtOAc = 10:1) in 92% yield. Viscous colorless oil;  **$^1H$  NMR** (500

MHz,  $CDCl_3$ ):  $\delta$  7.96 (s, 2H), 7.30 – 7.24 (m, 2H), 7.24 – 7.14 (m, 3H), 4.49 (ddd,  $J$  = 11.2, 8.2, 4.9 Hz, 1H), 4.41 (dt,  $J$  = 11.2, 5.6 Hz, 1H), 3.72 (s, 3H), 3.08 (dd,  $J$  = 14.1, 5.9 Hz, 1H), 2.99 – 2.90 (m, 2H), 2.84 (dd,  $J$  = 14.0, 6.9 Hz, 1H), 2.80 (s, 3H), 2.37 (dq,  $J$  = 16.4, 5.4 Hz, 1H), 2.27 (dtd,  $J$  = 14.6, 7.9, 5.5 Hz, 1H), 1.46 (s, 18H) ppm;  **$^{13}C$  NMR** (126 MHz,  $CDCl_3$ ):  $\delta$  166.77, 164.21, 144.29, 137.64, 128.84, 128.82, 128.36, 127.08, 124.21, 64.56, 62.37, 49.40, 46.88, 42.16, 36.66, 35.98, 32.01, 29.13 ppm; **HRMS** (ESI): ( $m/z$ ) calcd for  $C_{28}H_{39}NO_5S$   $[M+Na]^+$ : 524.2441, found: 524.2466; **IR**:  $\tilde{\nu}$  = 2956, 2924, 2870, 1715, 1596, 1455, 1411, 1379, 1363, 1315, 1301, 1226, 1148, 1116, 1007, 954, 888, 840, 786, 770, 751, 701, 678, 601, 575, 496  $cm^{-1}$ .

**1x:**

**2-(3-(2-((tert-butyl)dimethylsilyl)oxy)ethyl)-1-(methylsulfonyl)aziridin-2-yl)ethyl 3,5-di-tert-butyl-4-methoxybenzoate**

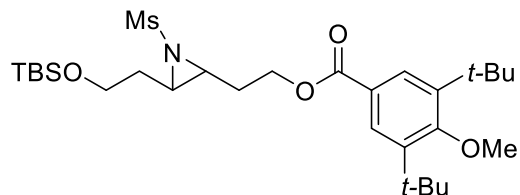

The title compound was synthesized according to **General Procedure B** and isolated by column chromatography (Petroleum ether / EtOAc = 10:1) in 87%

yield. Viscous colorless oil;  **$^1H$  NMR** (500 MHz,  $CDCl_3$ ):  $\delta$  7.94 (s, 2H), 4.47 (dd,  $J$  = 7.0, 5.4 Hz, 2H), 3.80 – 3.72 (m, 2H), 3.71 (s, 3H), 3.11 (s, 3H), 2.84 (q,  $J$  = 4.8, 4.3 Hz, 2H),

2.34 – 2.23 (m, 1H), 2.23 – 2.14 (m, 1H), 1.97 (q,  $J = 5.8$  Hz, 2H), 1.44 (s, 18H), 0.87 (s, 9H), 0.03 (s, 3H), 0.03 (s, 3H) ppm;  $^{13}\text{C}$  NMR (126 MHz,  $\text{CDCl}_3$ ):  $\delta$  166.85, 164.23, 144.30, 128.41, 124.24, 64.57, 62.39, 60.87, 47.04, 46.25, 42.20, 36.01, 33.02, 32.04, 29.76, 26.01, 18.35, -5.24, -5.26 ppm; HRMS (ESI): ( $m/z$ ) calcd for  $\text{C}_{29}\text{H}_{51}\text{NO}_6\text{SSi}$   $[\text{M}+\text{Na}]^+$ : 592.3098, found: 592.3128; IR:  $\tilde{\nu} = 2956, 2929, 2857, 1717, 1596, 1471, 1410, 1391, 1362, 1301, 1232, 1152, 1115, 1007, 939, 888, 835, 678, 602, 508$   $\text{cm}^{-1}$ .

**1y:**

**2-(3-(2-(benzyloxy)ethyl)-1-(methylsulfonyl)aziridin-2-yl)ethyl 3,5-di-tert-butyl-4-methoxybenzoate**

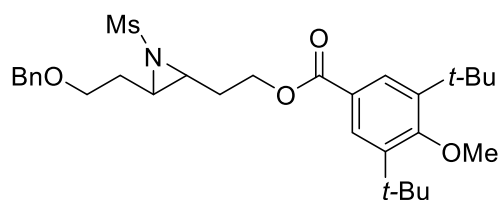

The title compound was synthesized according to **General Procedure B** and isolated by column chromatography (Petroleum ether / EtOAc = 10:1) in 89% yield. Viscous colorless

oil;  $^1\text{H}$  NMR (500 MHz,  $\text{CDCl}_3$ ):  $\delta$  7.95 (s, 2H), 7.36 – 7.23 (m, 5H), 4.48 (s, 2H), 4.46 (t,  $J = 6.2$  Hz, 2H), 3.70 (s, 3H), 3.66 – 3.56 (m, 2H), 3.03 (s, 3H), 2.88 (td,  $J = 6.3, 4.5$  Hz, 1H), 2.81 (td,  $J = 6.5, 4.5$  Hz, 1H), 2.34 – 2.18 (m, 2H), 2.12 – 2.03 (m, 1H), 2.03 – 1.92 (m, 1H), 1.44 (s, 18H) ppm;  $^{13}\text{C}$  NMR (126 MHz,  $\text{CDCl}_3$ ):  $\delta$  166.79, 164.18, 144.27, 138.03, 128.53, 128.36, 127.85, 127.84, 124.23, 73.17, 67.76, 64.54, 62.39, 46.94, 45.99, 42.12, 35.96, 32.00, 30.47, 29.43 ppm; HRMS (ESI): ( $m/z$ ) calcd for  $\text{C}_{30}\text{H}_{43}\text{NO}_6\text{S}$   $[\text{M}+\text{Na}]^+$ : 568.2703, found: 568.2731; IR:  $\tilde{\nu} = 2961, 2869, 1716, 1596, 1454, 1411, 1363, 1313, 1234, 1151, 1116, 1007, 968, 942, 888, 787, 770, 739, 699, 678, 598$   $\text{cm}^{-1}$ .

**1z:**

**(1-(methylsulfonyl)aziridine-2,3-diyl)bis(ethane-2,1-diyl) bis(3,5-di-tert-butyl-4-methoxybenzoate)**

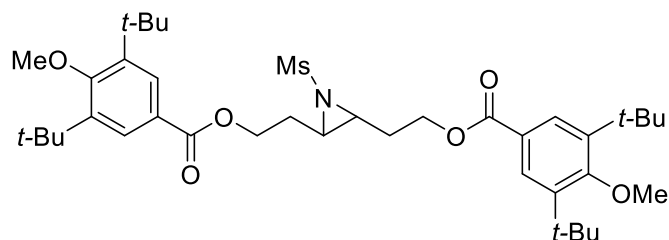

The title compound was synthesized according to **General Procedure B** and isolated by column

chromatography (Petroleum ether / EtOAc = 10:1) in 93% yield. Viscous colorless oil;  $^1\text{H}$

**NMR** (500 MHz, CDCl<sub>3</sub>): δ 7.93 (s, 4H), 4.49 (dt, *J* = 11.4, 5.8 Hz, 2H), 4.44 (ddd, *J* = 11.2, 8.0, 5.4 Hz, 2H), 3.70 (s, 6H), 3.12 (s, 3H), 2.87 (q, *J* = 4.7, 4.2 Hz, 2H), 2.29 (ddt, *J* = 13.9, 7.8, 5.7 Hz, 2H), 2.20 (dq, *J* = 14.3, 5.5 Hz, 2H), 1.43 (s, 36H) ppm; **<sup>13</sup>C NMR** (126 MHz, CDCl<sub>3</sub>): δ 166.78, 164.25, 144.33, 128.37, 124.16, 64.56, 62.26, 46.24, 42.32, 35.99, 32.01, 29.65 ppm; **HRMS** (ESI): (*m/z*) calcd for C<sub>39</sub>H<sub>59</sub>NO<sub>8</sub>S [M+Na]<sup>+</sup>: 724.3853, found: 724.3887; **IR**:  $\tilde{\nu}$  = 2961, 1716, 1596, 1448, 1410, 1393, 1363, 1300, 1227, 1132, 1007, 938, 888, 788, 769, 678, 601, 508 cm<sup>-1</sup>.

**1aa:**

**2-(3-(2-azidoethyl)-1-(methylsulfonyl)aziridin-2-yl)ethyl 3,5-di-tert-butyl-4-methoxybenzoate**

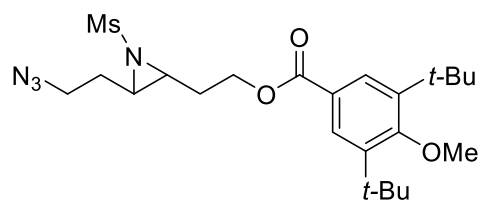

The title compound was synthesized according to **General Procedure B** and isolated by column chromatography (Petroleum ether / EtOAc = 5:1) in 85% yield. Viscous colorless oil; **<sup>1</sup>H NMR** (500

MHz, CDCl<sub>3</sub>): δ 7.94 (s, 2H), 4.48 (t, *J* = 6.0 Hz, 2H), 3.71 (s, 3H), 3.49 (h, *J* = 6.1 Hz, 2H), 3.13 (s, 3H), 2.84 (td, *J* = 6.6, 4.4 Hz, 1H), 2.78 (td, *J* = 6.3, 4.4 Hz, 1H), 2.25 (q, *J* = 6.2 Hz, 2H), 2.04 (q, *J* = 6.4 Hz, 2H), 1.45 (s, 18H) ppm; **<sup>13</sup>C NMR** (126 MHz, CDCl<sub>3</sub>): δ 166.89, 164.33, 144.41, 128.41, 124.13, 64.61, 62.20, 49.48, 46.35, 46.06, 42.35, 36.04, 32.04, 29.66, 29.48 ppm; **HRMS** (ESI): (*m/z*) calcd for C<sub>23</sub>H<sub>36</sub>N<sub>4</sub>O<sub>5</sub>S [M+Na]<sup>+</sup>: 503.2298, found: 503.2323; **IR**:  $\tilde{\nu}$  = 2962, 2101, 1715, 1596, 1448, 1411, 1363, 1302, 1233, 1151, 1008, 969, 937, 889, 788, 770, 678, 597, 510, 404 cm<sup>-1</sup>.

## General Procedures and Characterization Data for Hydrolytic Ring-opening Reactions

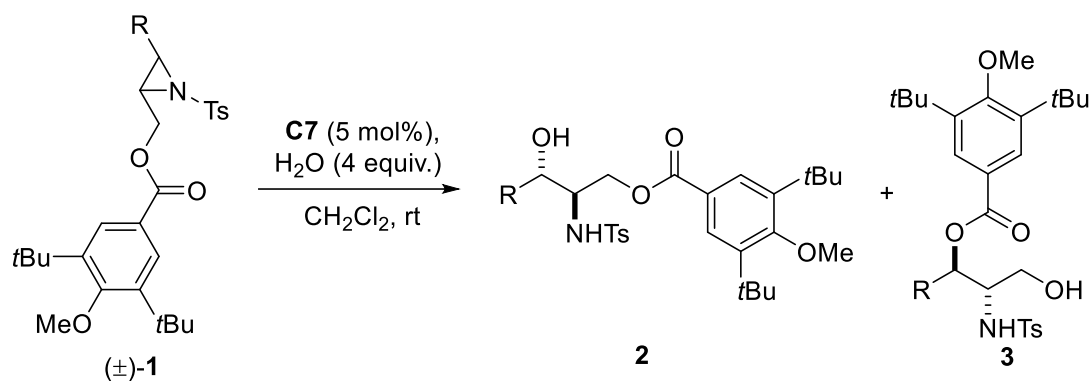

Catalyst **C7** (0.005 mmol, 5 mol%), corresponding **1** (0.1 mmol, 1.0 equiv.) and  $\text{H}_2\text{O}$  (0.4 mmol, 4.0 equiv.) were dissolved in  $\text{CH}_2\text{Cl}_2$  (2 mL) at rt. The mixture was stirred at rt and the reaction progress was monitored by TLC. After complete consumption of **1**, the solvent was removed under reduced pressure. The crude products were purified and separated (**2** and **3**) by column chromatography (Petroleum ether / EtOAc = 3:1). The enantiomeric ratio was determined by HPLC on a chiral stationary phase.

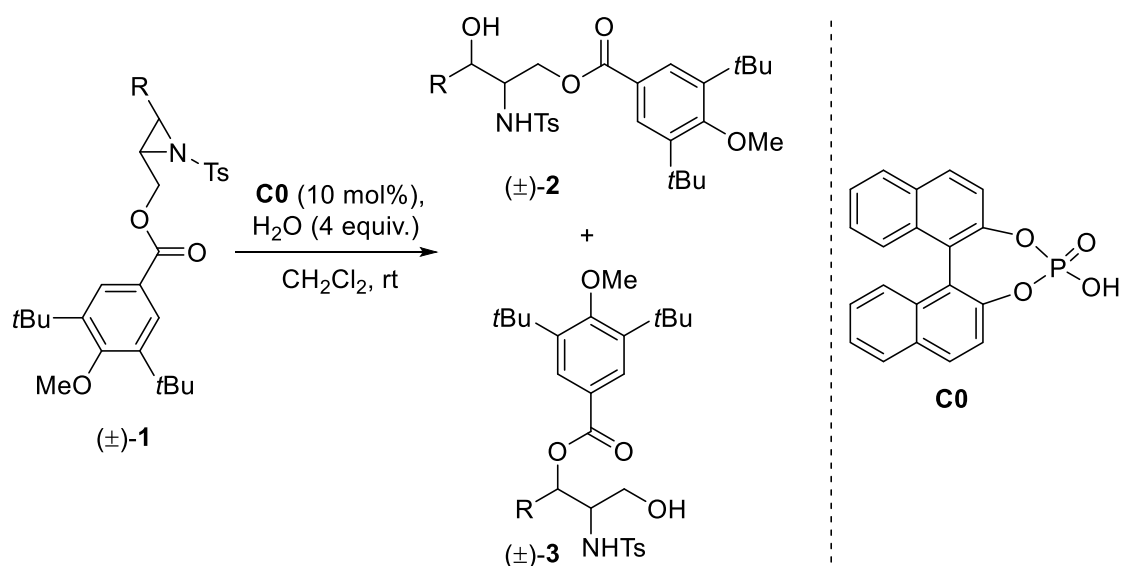

The racemic mixture of the products was obtained by using racemic mixture of **C0** as the catalyst according to the above procedure.

**2a:**

**(2R,3S)-3-hydroxy-2-((4-methylphenyl)sulfonamido)-3-phenylpropyl 3,5-di-tert-butyl-4-methoxybenzoate**

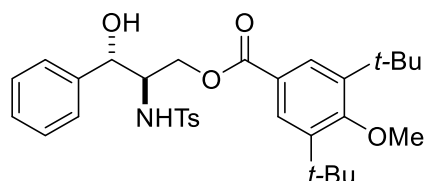

The title compound was synthesized according to the general procedure and isolated by column chromatography (Petroleum ether / EtOAc = 3:1) in 48% yield. Viscous colorless oil;  $[\alpha]_D^{19} = -27.0$  ( $c =$

1.0,  $\text{CHCl}_3$ );  $^1\text{H NMR}$  (500 MHz,  $\text{CDCl}_3$ ):  $\delta$  7.81 (s, 2H), 7.68 – 7.63 (m, 2H), 7.31 – 7.29 (m, 4H), 7.29 – 7.22 (m, 1H), 7.07 (d,  $J = 8.0$  Hz, 2H), 5.34 (d,  $J = 7.8$  Hz, 1H), 4.93 (d,  $J = 4.1$  Hz, 1H), 4.44 (dd,  $J = 11.9, 7.2$  Hz, 1H), 4.07 (dd,  $J = 11.9, 4.2$  Hz, 1H), 3.87 (dq,  $J = 7.5, 3.9$  Hz, 1H), 3.72 (s, 3H), 2.97 (s, 1H), 2.26 (s, 3H), 1.44 (s, 18H) ppm;  $^{13}\text{C NMR}$  (126 MHz,  $\text{CDCl}_3$ ):  $\delta$  167.35, 164.39, 144.25, 143.43, 139.48, 137.36, 129.76, 128.77, 128.63, 128.16, 127.05, 126.07, 123.65, 74.22, 64.58, 62.48, 58.79, 36.01, 32.05, 21.63 ppm; **HRMS** (ESI): ( $m/z$ ) calcd for  $\text{C}_{32}\text{H}_{41}\text{NO}_6\text{S}$  [ $\text{M}+\text{H}$ ] $^+$ : 568.2728, found: 568.2739; **IR**:  $\tilde{\nu} = 3491, 3276, 2960, 1715, 1598, 1495, 1451, 1411, 1392, 1300, 1227, 1160, 1117, 1093, 1062, 1007, 911, 887, 813, 759, 704, 664, 551$   $\text{cm}^{-1}$ ; **HPLC**: *er* was determined by HPLC analysis (Chiralpak IC, *i*PrOH/Hexane =20/80, 1.0 mL/min, 254 nm) Retention time:  $t_{\text{minor}} = 8.61$  min,  $t_{\text{major}} = 14.64$  min, *er* = 99:1.

**3a:**

**(1R,2S)-3-hydroxy-2-((4-methylphenyl)sulfonamido)-1-phenylpropyl 3,5-di-tert-butyl-4-methoxybenzoate**

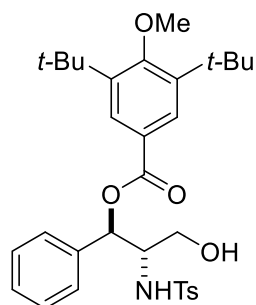

The title compound was synthesized according to the general procedure and isolated by column chromatography (Petroleum ether / EtOAc = 3:1) in 50% yield. Viscous colorless oil;  $[\alpha]_D^{19} = +17.2$  ( $c = 0.5, \text{CHCl}_3$ );  $^1\text{H NMR}$  (500 MHz,  $\text{CDCl}_3$ ):  $\delta$  7.96 (s, 2H), 7.57 (d,  $J = 8.4$  Hz, 2H), 7.29 – 7.22 (m, 5H), 7.17 (d,  $J = 8.0$  Hz, 2H), 5.91 (d,  $J = 6.5$  Hz, 1H), 5.25 (d,  $J = 9.0$  Hz, 1H), 3.81 (ddt,  $J = 8.9, 6.6, 3.9$  Hz, 1H), 3.76 (d,  $J = 4.1$  Hz, 1H), 3.71 (s, 3H), 3.63 (d,  $J = 3.8$  Hz, 1H), 2.38 (s, 3H), 2.13 (brs, 1H), 1.44 (s, 18H) ppm;  $^{13}\text{C NMR}$  (126 MHz,  $\text{CDCl}_3$ ):  $\delta$  166.37, 164.68, 144.50, 143.52, 137.44, 136.81, 129.82, 128.79, 128.71, 128.57, 127.13, 126.95,



123.58, 75.13, 64.64, 61.21, 59.01, 36.03, 31.98, 21.66 ppm; **HRMS** (ESI): (*m/z*) calcd for C<sub>32</sub>H<sub>41</sub>NO<sub>6</sub>S [M+Na]<sup>+</sup>: 590.2547, found: 590.2571; **IR**:  $\tilde{\nu}$  = 3278, 2959, 2925, 1718, 1597, 1455, 1410, 1363, 1298, 1227, 1159, 1136, 1117, 1093, 1055, 1006, 971, 888, 814, 758, 701, 664, 551 cm<sup>-1</sup>; **HPLC**: *er* was determined by HPLC analysis (Chiralpak IA, *i*PrOH/Hexane = 20/80, 1.0 mL/min, 254 nm) Retention time: *t*<sub>minor</sub> = 6.18 min, *t*<sub>major</sub> = 7.04 min, *er* = >99.5:0.5.

**2b:**

**(2R,3S)-3-(4-fluorophenyl)-3-hydroxy-2-((4-methylphenyl)sulfonamido)propyl 3,5-di-tert-butyl-4-methoxybenzoate**

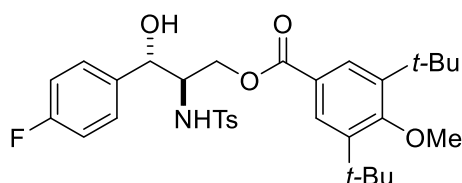

The title compound was synthesized according to the general procedure and isolated by column chromatography (Petroleum ether / EtOAc = 3:1)

in 49% yield. Viscous colorless oil;  $[\alpha]_D^{21}$  = -14.4

(*c* = 1.0, CHCl<sub>3</sub>); **<sup>1</sup>H NMR** (500 MHz, CDCl<sub>3</sub>):  $\delta$  7.80 (s, 2H), 7.62 (d, *J* = 8.0 Hz, 2H), 7.32 – 7.20 (m, 2H), 7.06 (d, *J* = 8.0 Hz, 2H), 6.95 (t, *J* = 8.5 Hz, 2H), 5.37 (d, *J* = 8.0 Hz, 1H), 4.87 (t, *J* = 4.6 Hz, 1H), 4.47 (dd, *J* = 11.9, 6.8 Hz, 1H), 4.12 (dd, *J* = 11.9, 4.1 Hz, 1H), 3.82 (tt, *J* = 8.1, 4.4 Hz, 1H), 3.72 (s, 3H), 3.20 (d, *J* = 4.7 Hz, 1H), 2.27 (s, 3H), 1.43 (s, 18H) ppm; **<sup>13</sup>C NMR** (126 MHz, CDCl<sub>3</sub>):  $\delta$  167.46, 164.48, 162.47 (d, *J* = 246.5 Hz), 144.29, 143.52, 137.22, 135.38 (d, *J* = 3.2 Hz), 129.75, 128.62, 127.82 (d, *J* = 8.1 Hz), 126.99, 123.50, 115.55 (d, *J* = 21.5 Hz), 73.56, 64.59, 62.57, 58.87, 36.01, 32.03, 21.61 ppm; **<sup>19</sup>F NMR** (471 MHz, CDCl<sub>3</sub>):  $\delta$  -114.07 ppm; **HRMS** (ESI): (*m/z*) calcd for C<sub>32</sub>H<sub>40</sub>FNO<sub>6</sub>S [M+Na]<sup>+</sup>: 608.2452, found: 608.2478; **IR**:  $\tilde{\nu}$  = 3467, 3277, 2960, 2926, 2855, 1716, 1663, 1603, 1510, 1447, 1410, 1301, 1225, 1159, 1116, 1093, 1011, 887, 835, 812, 769, 705, 664, 578, 550 cm<sup>-1</sup>; **HPLC**: *er* was determined by HPLC analysis (Chiralpak IC, *i*PrOH/Hexane = 20/80, 1.0 mL/min, 210 nm) Retention time: *t*<sub>minor</sub> = 6.91 min, *t*<sub>major</sub> = 9.86 min, *er* = 99.5:0.5.

**3b:**

**(1R,2S)-1-(4-fluorophenyl)-3-hydroxy-2-((4-methylphenyl)sulfonamido)propyl 3,5-di-tert-butyl-4-methoxybenzoate**

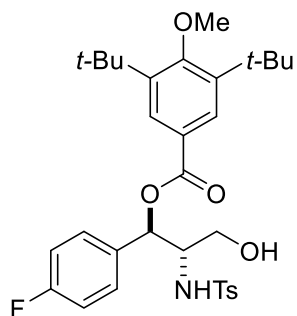

The title compound was synthesized according to the general procedure and isolated by column chromatography (Petroleum ether / EtOAc = 3:1) in 50% yield. Viscous colorless oil;  $[\alpha]_D^{25} = +39.8$  ( $c = 0.5$ ,  $\text{CHCl}_3$ );  $^1\text{H NMR}$  (500 MHz,  $\text{CDCl}_3$ ):  $\delta$  7.93 (s, 2H), 7.48 (d,  $J = 8.1$  Hz, 2H), 7.21 (dd,  $J = 8.5, 5.3$  Hz, 2H), 7.14 (d,  $J = 8.0$  Hz, 2H), 6.86 (t,  $J = 8.5$  Hz, 2H), 5.87 (d,  $J = 7.8$  Hz, 1H), 5.44 (d,  $J = 9.2$  Hz, 1H), 3.83 – 3.75 (m, 2H), 3.74 – 3.66 (m, 1H), 3.70 (m, 3H), 2.65 (dd,  $J = 8.3, 4.4$  Hz, 1H), 2.39 (s, 3H), 1.43 (s, 18H) ppm;  $^{13}\text{C NMR}$  (126 MHz,  $\text{CDCl}_3$ ):  $\delta$  166.33, 164.75, 162.77 (d,  $J = 247.0$  Hz), 144.55, 143.52, 137.42, 132.93 (d,  $J = 3.2$  Hz), 129.70, 128.94 (d,  $J = 8.3$  Hz), 128.66, 127.00, 123.45, 115.55 (d,  $J = 21.8$  Hz), 73.91, 64.63, 61.46, 59.03, 36.01, 31.96, 21.58 ppm;  $^{19}\text{F NMR}$  (471 MHz,  $\text{CDCl}_3$ ):  $\delta$  -113.21 ppm; **HRMS** (ESI): ( $m/z$ ) calcd for  $\text{C}_{32}\text{H}_{40}\text{FNO}_6\text{S}$   $[\text{M}+\text{Na}]^+$ : 608.2452, found: 608.2457; **IR**:  $\tilde{\nu} = 3503, 3278, 2961, 1717, 1606, 1512, 1455, 1410, 1362, 1303, 1226, 1158, 1135, 1094, 1060, 1006, 887, 833, 813, 767, 665, 545, 486, 419, 411, 402$   $\text{cm}^{-1}$ ; **HPLC**: *er* was determined by HPLC analysis (Chiralpak IA, *i*PrOH/Hexane = 20/80, 1.0 mL/min, 254 nm) Retention time:  $t_{\text{minor}} = 5.69$  min,  $t_{\text{major}} = 6.66$  min, *er* = >99.5:0.5.

## 2c:

### (2R,3S)-3-(4-chlorophenyl)-3-hydroxy-2-((4-methylphenyl)sulfonamido)propyl 3,5-di-tert-butyl-4-methoxybenzoate

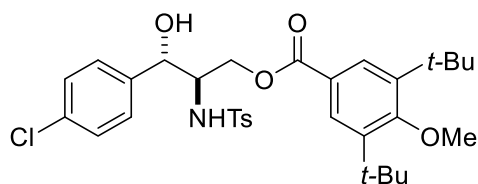

The title compound was synthesized according to the general procedure and isolated by column chromatography (Petroleum ether / EtOAc = 3:1) in 43% yield. Viscous colorless oil;  $[\alpha]_D^{25} = -17.0$  ( $c = 0.5$ ,  $\text{CHCl}_3$ );  $^1\text{H NMR}$  (500 MHz,  $\text{CDCl}_3$ ):  $\delta$  7.81 (s, 2H), 7.59 (d,  $J = 8.4$  Hz, 2H), 7.21 (s, 4H), 7.05 (d,  $J = 8.0$  Hz, 2H), 5.40 (d,  $J = 8.2$  Hz, 1H), 4.84 (t,  $J = 4.7$  Hz, 1H), 4.51 (dd,  $J = 12.0, 6.8$  Hz, 1H), 4.13 (dd,  $J = 11.9, 4.1$  Hz, 1H), 3.83 – 3.75 (m, 1H), 3.72 (s, 3H), 3.28 (d,  $J = 4.7$  Hz, 1H), 2.27 (s, 3H), 1.43 (s, 18H) ppm;  $^{13}\text{C NMR}$  (126 MHz,  $\text{CDCl}_3$ ):  $\delta$  167.52, 164.51, 144.31, 143.55, 138.19, 137.12, 133.88, 129.74, 128.76, 128.64, 127.55, 126.97, 123.45, 73.53, 64.59, 62.65, 58.87, 36.01, 32.03, 21.65 ppm;

**HRMS** (ESI): ( $m/z$ ) calcd for  $C_{32}H_{40}ClNO_6S$   $[M+H]^+$ : 602.2338, found: 602.2338; **IR**:  $\tilde{\nu}$  = 3488, 3279, 2960, 2925, 1716, 1698, 1598, 1491, 1447, 1410, 1393, 1363, 1301, 1228, 1160, 1117, 1092, 1013, 887, 812, 769, 706, 666, 570, 551, 471, 404  $cm^{-1}$ ; **HPLC**: *er* was determined by HPLC analysis (Chiralpak IC, *i*PrOH/Hexane = 20/80, 1.0 mL/min, 210 nm) Retention time:  $t_{minor}$  = 6.75 min,  $t_{major}$  = 9.44 min, *er* = 99:1.

**3c:**

**(1R,2S)-1-(4-chlorophenyl)-3-hydroxy-2-((4-methylphenyl)sulfonamido)propyl 3,5-di-tert-butyl-4-methoxybenzoate**

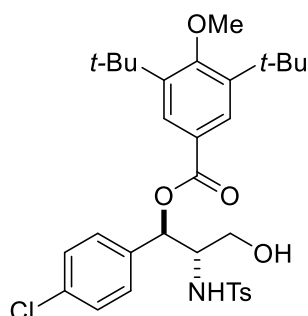

The title compound was synthesized according to the general procedure and isolated by column chromatography (Petroleum ether / EtOAc = 3:1) in 53% yield. Viscous colorless oil;  $[\alpha]_D^{25}$  = +43.7 ( $c$  = 1.0,  $CHCl_3$ );  **$^1H$  NMR** (500 MHz,  $CDCl_3$ ):  $\delta$  7.92 (s, 2H), 7.44 (d,  $J$  = 8.4 Hz, 2H), 7.19 – 7.06 (m, 6H), 5.84 (d,  $J$  = 8.2 Hz, 1H), 5.51 (d,  $J$  = 9.3 Hz, 1H),

3.84 (dd,  $J$  = 11.9, 4.0 Hz, 1H), 3.81 – 3.74 (m, 2H), 3.70 (s, 3H), 2.73 (d,  $J$  = 6.7 Hz, 1H), 2.41 (s, 3H), 1.42 (s, 18H) ppm;  **$^{13}C$  NMR** (126 MHz,  $CDCl_3$ ):  $\delta$  166.29, 164.78, 144.56, 143.55, 137.28, 135.74, 134.50, 129.67, 128.69, 128.66, 128.57, 126.93, 123.39, 73.77, 64.64, 61.59, 58.97, 36.01, 31.96, 21.69 ppm; **HRMS** (ESI): ( $m/z$ ) calcd for  $C_{32}H_{40}ClNO_6S$   $[M+H]^+$ : 602.2338, found: 602.2337; **IR**:  $\tilde{\nu}$  = 3284, 2960, 2925, 1717, 1598, 1493, 1448, 1411, 1363, 1329, 1303, 1293, 1258, 1225, 1157, 1134, 1116, 1092, 1059, 1006, 910, 887, 812, 755, 705, 680, 664, 550, 535  $cm^{-1}$ ; **HPLC**: *er* was determined by HPLC analysis (Chiralpak IA, *i*PrOH/Hexane = 20/80, 1.0 mL/min, 254 nm) Retention time:  $t_{minor}$  = 6.22 min,  $t_{major}$  = 8.35 min, *er* = 96:4.

**2d:**

**(2R,3S)-3-(4-bromophenyl)-3-hydroxy-2-((4-methylphenyl)sulfonamido)propyl 3,5-di-tert-butyl-4-methoxybenzoate**

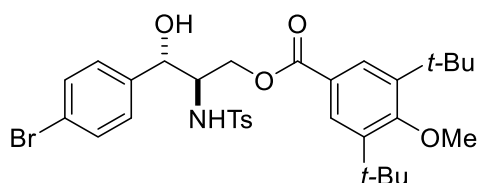

The title compound was synthesized according to the general procedure and isolated by column chromatography (Petroleum ether / EtOAc = 3:1)

in 46% yield. Viscous colorless oil;  $[\alpha]_{\text{D}}^{25} = -17.1$  ( $c = 1.0$ ,  $\text{CHCl}_3$ );  **$^1\text{H NMR}$**  (500 MHz,  $\text{CDCl}_3$ ):  $\delta$  7.81 (s, 2H), 7.58 (d,  $J = 8.1$  Hz, 2H), 7.36 (d,  $J = 8.1$  Hz, 2H), 7.15 (d,  $J = 8.2$  Hz, 2H), 7.06 (d,  $J = 8.0$  Hz, 2H), 5.39 (d,  $J = 8.1$  Hz, 1H), 4.82 (t,  $J = 4.7$  Hz, 1H), 4.51 (dd,  $J = 12.0, 6.7$  Hz, 1H), 4.13 (dd,  $J = 11.9, 4.0$  Hz, 1H), 3.79 (tt,  $J = 8.2, 4.5$  Hz, 1H), 3.72 (s, 3H), 3.29 (d,  $J = 4.6$  Hz, 1H), 2.28 (s, 3H), 1.43 (s, 18H) ppm;  **$^{13}\text{C NMR}$**  (126 MHz,  $\text{CDCl}_3$ ):  $\delta$  167.54, 164.51, 144.32, 143.56, 138.71, 137.06, 131.69, 129.75, 128.65, 127.89, 126.95, 123.43, 122.04, 73.57, 64.60, 62.65, 58.83, 36.01, 32.04, 21.68 ppm; **HRMS** (ESI): ( $m/z$ ) calcd for  $\text{C}_{32}\text{H}_{40}\text{BrNO}_6\text{S}$   $[\text{M}+\text{H}]^+$ : 646.1833, found: 646.1831; **IR**:  $\tilde{\nu} = 3283, 2956, 2922, 2852, 1716, 1663, 1597, 1486, 1465, 1409, 1301, 1226, 1159, 1116, 1093, 1072, 1010, 887, 812, 769, 664, 568, 551$   $\text{cm}^{-1}$ ; **HPLC**: *er* was determined by HPLC analysis (Chiralpak IC, *i*PrOH/Hexane = 20/80, 1.0 mL/min, 210 nm) Retention time:  $t_{\text{minor}} = 7.36$  min,  $t_{\text{major}} = 10.55$  min, *er* = 98:2.

### 3d:

#### (1R,2S)-1-(4-bromophenyl)-3-hydroxy-2-((4-methylphenyl)sulfonamido)propyl 3,5-di-tert-butyl-4-methoxybenzoate

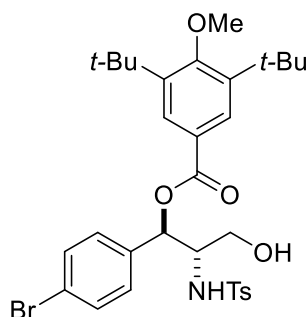

The title compound was synthesized according to the general procedure and isolated by column chromatography (Petroleum ether / EtOAc = 3:1) in 48% yield. Viscous colorless oil;  $[\alpha]_{\text{D}}^{19} = +29.2$  ( $c = 1.0$ ,  $\text{CHCl}_3$ );  **$^1\text{H NMR}$**  (500 MHz,  $\text{CDCl}_3$ ):  $\delta$  7.92 (s, 2H), 7.43 (d,  $J = 8.0$  Hz, 2H), 7.25 (d,  $J = 7.4$  Hz, 2H), 7.14 (d,  $J = 8.0$  Hz, 2H), 7.09 (d,  $J = 8.2$  Hz, 2H), 5.82 (d,  $J = 8.3$  Hz, 1H), 5.52 (d,  $J = 9.3$  Hz, 1H), 3.84 (d,  $J = 11.7$  Hz, 1H), 3.81 – 3.74 (m, 2H), 3.70 (s, 3H), 2.74 (d,  $J = 6.5$  Hz, 1H), 2.43 (s, 3H), 1.42 (s, 18H) ppm;  **$^{13}\text{C NMR}$**  (126 MHz,  $\text{CDCl}_3$ ):  $\delta$  166.28, 164.78, 144.56, 143.56, 137.22, 136.27, 131.61, 129.69, 128.89, 128.66, 126.91, 123.37, 122.74, 73.78, 64.64, 61.59, 58.88, 36.01, 31.96, 21.76 ppm; **HRMS** (ESI): ( $m/z$ ) calcd for  $\text{C}_{32}\text{H}_{40}\text{BrNO}_6\text{S}$   $[\text{M}+\text{H}]^+$ : 646.1833, found: 646.1839; **IR**:  $\tilde{\nu} = 3504, 3277, 2960, 1717, 1596, 1488, 1447, 1410, 1363, 1329, 1303, 1293, 1225, 1156, 1134, 1117, 1093, 1071, 1006, 909, 887, 812, 754, 705, 663, 550, 533$   $\text{cm}^{-1}$ ; **HPLC**: *er* was determined by HPLC analysis (Chiralpak IA, *i*PrOH/Hexane = 20/80,

1.0 mL/min, 254 nm) Retention time:  $t_{\text{minor}} = 6.19$  min,  $t_{\text{major}} = 9.23$  min,  $er = 95:5$ .

**2e:**

**(2R,3S)-3-hydroxy-2-(methylsulfonamido)-3-(4-(trifluoromethyl)phenyl)propyl 3,5-di-tert-butyl-4-methoxybenzoate**

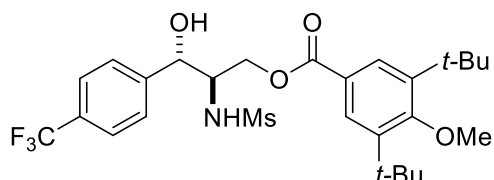

The title compound was synthesized according to the general procedure and isolated by column chromatography (Petroleum ether / EtOAc = 3:1) in 46% yield. Viscous colorless oil;

$[\alpha]_{\text{D}}^{20} = -6.2$  ( $c = 0.5$ ,  $\text{CHCl}_3$ );  **$^1\text{H NMR}$**  (500 MHz,  $\text{CDCl}_3$ ):  $\delta$  7.88 (s, 2H), 7.64 (d,  $J = 8.2$  Hz, 2H), 7.58 (d,  $J = 8.1$  Hz, 2H), 5.26 (d,  $J = 9.1$  Hz, 1H), 5.08 (t,  $J = 4.2$  Hz, 1H), 4.58 (dd,  $J = 11.9, 7.8$  Hz, 1H), 4.20 (dd,  $J = 11.9, 4.0$  Hz, 1H), 4.11 – 4.02 (m, 1H), 3.70 (s, 3H), 3.40 (d,  $J = 4.5$  Hz, 1H), 2.79 (s, 3H), 1.42 (s, 18H) ppm;  **$^{13}\text{C NMR}$**  (126 MHz,  $\text{CDCl}_3$ ):  $\delta$  167.42, 164.68, 144.60, 143.94, 130.57 (q,  $J = 32.3$  Hz), 128.53, 126.73, 125.77 (q,  $J = 3.7$  Hz), 124.04 (q,  $J = 272.4$  Hz), 123.35, 74.37, 64.60, 62.79, 59.00, 41.75, 36.04, 31.99 ppm;  **$^{19}\text{F NMR}$**  (471 MHz,  $\text{CDCl}_3$ ):  $\delta$  -62.55 ppm; **HRMS** (ESI): ( $m/z$ ) calcd for  $\text{C}_{27}\text{H}_{36}\text{F}_3\text{NO}_6\text{S}$   $[\text{M}+\text{H}]^+$ : 560.2288, found: 560.2295; **IR**:  $\tilde{\nu} = 3485, 3281, 2962, 1704, 1620, 1595, 1447, 1413, 1363, 1325, 1229, 1127, 1068, 1008, 887, 851, 769, 522$   $\text{cm}^{-1}$ ; **HPLC**:  $er$  was determined by HPLC analysis (Chiralpak IC,  $i\text{PrOH/Hexane} = 20/80$ , 1.0 mL/min, 254 nm) Retention time:  $t_{\text{minor}} = 4.80$  min,  $t_{\text{major}} = 6.99$  min,  $er = 98:2$ .

**3e:**

**(1R,2S)-3-hydroxy-2-(methylsulfonamido)-1-(4-(trifluoromethyl)phenyl)propyl 3,5-di-tert-butyl-4-methoxybenzoate**

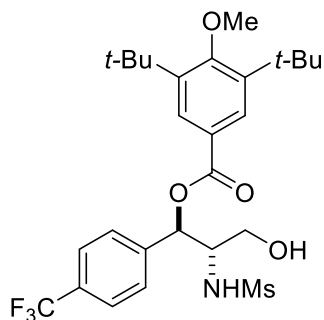

The title compound was synthesized according to the general procedure and isolated by column chromatography (Petroleum ether / EtOAc = 3:1) in 51% yield. Viscous colorless oil;  $[\alpha]_{\text{D}}^{20} = +68.4$  ( $c = 0.5$ ,  $\text{CHCl}_3$ );  **$^1\text{H NMR}$**  (500 MHz,  $\text{CDCl}_3$ ):  $\delta$  7.98 (s, 2H), 7.68 (d,  $J = 8.3$  Hz, 2H), 7.63 (d,  $J = 8.3$  Hz, 2H), 6.06 (d,  $J = 8.1$  Hz, 1H), 5.39 (d,  $J = 9.5$  Hz, 1H), 4.00 (ddt,  $J = 9.4, 7.8, 3.7$  Hz, 1H), 3.90 (dt,  $J = 11.8, 4.0$  Hz, 1H), 3.82 (ddd,  $J =$

11.6, 5.3, 2.5 Hz, 1H), 3.72 (s, 3H), 2.83 – 2.78 (m, 1H), 2.41 (s, 3H), 1.44 (s, 18H) ppm; **<sup>13</sup>C NMR** (126 MHz, CDCl<sub>3</sub>): δ 166.24, 164.97, 144.76, 141.87, 131.18 (q, *J* = 32.8 Hz), 128.69, 128.03, 125.85 (q, *J* = 3.7 Hz), 123.92 (q, *J* = 272.2 Hz), 123.24, 73.90, 64.68, 61.89, 59.32, 41.63, 36.06, 31.97 ppm; **<sup>19</sup>F NMR** (471 MHz, CDCl<sub>3</sub>): δ -62.68 ppm; **HRMS** (ESI): (*m/z*) calcd for C<sub>27</sub>H<sub>36</sub>F<sub>3</sub>NO<sub>6</sub>S [M+H]<sup>+</sup>: 560.2288, found: 560.2293; **IR**: ν̄ = 3282, 2962, 1719, 1621, 1595, 1449, 1412, 1325, 1301, 1227, 1129, 1068, 1008, 888, 837, 770, 612, 524 cm<sup>-1</sup>; **HPLC**: *er* was determined by HPLC analysis (Chiralpak IA, *i*PrOH/Hexane = 20/80, 1.0 mL/min, 254 nm) Retention time: *t*<sub>minor</sub> = 4.46 min, *t*<sub>major</sub> = 7.24 min, *er* = 97:3.

**2f:**

**(2R,3S)-3-hydroxy-2-((4-methylphenyl)sulfonamido)-3-(*p*-tolyl)propyl 3,5-di-*tert*-butyl-4-methoxybenzoate**

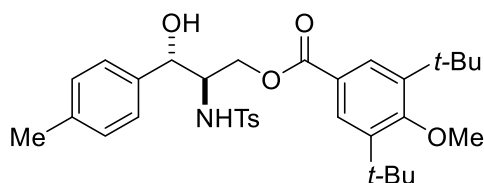

The title compound was synthesized according to the general procedure (variations: **C6** as the catalyst) and isolated by column chromatography (Petroleum ether / EtOAc = 3:1)

in 43% yield. Viscous colorless oil; [α]<sub>D</sub><sup>20</sup> = -13.8 (*c* = 0.5, CHCl<sub>3</sub>); **<sup>1</sup>H NMR** (500 MHz, CDCl<sub>3</sub>): δ 7.82 (s, 2H), 7.65 (d, *J* = 8.2 Hz, 2H), 7.17 (d, *J* = 7.9 Hz, 2H), 7.10 (d, *J* = 7.8 Hz, 2H), 7.06 (d, *J* = 8.0 Hz, 2H), 5.31 (d, *J* = 7.9 Hz, 1H), 4.88 (t, *J* = 4.2 Hz, 1H), 4.43 (dd, *J* = 11.9, 7.1 Hz, 1H), 4.10 (dd, *J* = 11.9, 4.1 Hz, 1H), 3.84 (dt, *J* = 7.5, 3.7 Hz, 1H), 3.72 (s, 3H), 2.93 (d, *J* = 4.7 Hz, 1H), 2.31 (s, 3H), 2.26 (s, 3H), 1.44 (s, 18H) ppm; **<sup>13</sup>C NMR** (126 MHz, CDCl<sub>3</sub>): δ 167.32, 164.34, 144.21, 143.34, 137.85, 137.40, 136.47, 129.69, 129.40, 128.62, 127.04, 125.96, 123.69, 74.03, 64.57, 62.59, 58.76, 36.00, 32.04, 21.63, 21.26 ppm; **HRMS** (ESI): (*m/z*) calcd for C<sub>33</sub>H<sub>43</sub>NO<sub>6</sub>S [M+Na]<sup>+</sup>: 604.2703, found: 604.2730; **IR**: ν̄ = 3488, 3273, 2960, 1714, 1598, 1515, 1447, 1411, 1392, 1299, 1225, 1159, 1116, 1092, 1007, 911, 887, 843, 813, 756, 724, 705, 665, 577, 551 cm<sup>-1</sup>; **HPLC**: *er* was determined by HPLC analysis (Chiralpak IC, *i*PrOH/Hexane = 20/80, 1.0 mL/min, 254 nm) Retention time: *t*<sub>minor</sub> = 10.21 min, *t*<sub>major</sub> = 19.96 min, *er* = 98:2.

**3f:**

**(1R,2S)-3-hydroxy-2-((4-methylphenyl)sulfonamido)-1-(p-tolyl)propyl 3,5-di-tert-butyl-4-methoxybenzoate**

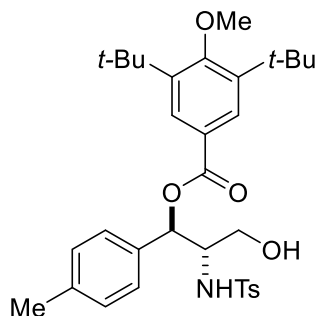

The title compound was synthesized according to the general procedure (variations: **C6** as the catalyst) and isolated by column chromatography (Petroleum ether / EtOAc = 2:1) in 48% yield. Viscous colorless oil;  $[\alpha]_D^{20} = +20.2$  ( $c = 0.5$ ,  $\text{CHCl}_3$ ); **<sup>1</sup>H NMR** (500 MHz,  $\text{CDCl}_3$ ):  $\delta$  7.95 (s, 2H), 7.55 (d,  $J = 8.1$  Hz, 2H), 7.14 (dd,  $J = 15.1, 7.9$  Hz, 4H), 7.04 (d,  $J = 7.9$  Hz, 2H), 5.86 (d,  $J = 6.7$  Hz, 1H), 5.26 (d,  $J = 8.9$  Hz, 1H), 3.82 – 3.77 (m, 1H), 3.77 – 3.72 (m, 1H), 3.71 (s, 3H), 3.67 (dt,  $J = 11.1, 6.5$  Hz, 1H), 2.44 (d,  $J = 7.4$  Hz, 1H), 2.38 (s, 3H), 2.31 (s, 3H), 1.43 (s, 18H) ppm; **<sup>13</sup>C NMR** (126 MHz,  $\text{CDCl}_3$ ):  $\delta$  166.40, 164.61, 144.42, 143.35, 138.36, 137.46, 133.79, 129.67, 129.39, 128.69, 127.12, 126.87, 123.64, 74.92, 64.62, 61.36, 59.01, 36.00, 31.97, 21.67, 21.32 ppm; **HRMS** (ESI): ( $m/z$ ) calcd for  $\text{C}_{33}\text{H}_{43}\text{NO}_6\text{S}$   $[\text{M}+\text{Na}]^+$ : 604.2703, found: 604.2730; **IR**:  $\tilde{\nu} = 3504, 3273, 2960, 1716, 1597, 1516, 1448, 1410, 1363, 1297, 1226, 1184, 1158, 1137, 1117, 1093, 1057, 1005, 910, 888, 843, 811, 756, 705, 665, 551$   $\text{cm}^{-1}$ ; **HPLC**: *er* was determined by HPLC analysis (Chiralpak IA, *i*PrOH/Hexane = 20/80, 1.0 mL/min, 254 nm) Retention time:  $t_{\text{minor}} = 6.67$  min,  $t_{\text{major}} = 7.77$  min, *er* = 90.5:9.5.

**2g:**

**(2R,3S)-3-(3-fluorophenyl)-3-hydroxy-2-((4-methylphenyl)sulfonamido)propyl 3,5-di-tert-butyl-4-methoxybenzoate**

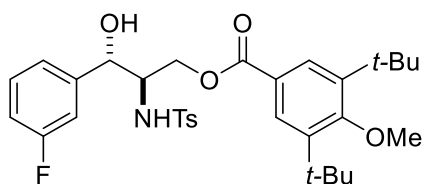

The title compound was synthesized according to the general procedure and isolated by column chromatography (Petroleum ether / EtOAc = 3:1) in 49% yield. Viscous colorless oil;  $[\alpha]_D^{25} = -20.6$  ( $c = 1.0$ ,  $\text{CHCl}_3$ ); **<sup>1</sup>H NMR** (500 MHz,  $\text{CDCl}_3$ ):  $\delta$  7.80 (s, 2H), 7.67 – 7.62 (m, 2H), 7.30 – 7.22 (m, 1H), 7.11 – 6.99 (m, 4H), 6.91 (td,  $J = 8.5, 2.6$  Hz, 1H), 5.49 (d,  $J = 7.9$  Hz, 1H), 4.92 (t,  $J = 4.5$  Hz, 1H), 4.48 (dd,  $J = 12.0, 7.3$  Hz, 1H), 4.09 (dd,  $J = 11.9, 4.1$  Hz, 1H), 3.83 (tt,  $J = 7.9, 4.2$  Hz, 1H), 3.72 (s, 3H), 3.26 (d,  $J = 4.7$  Hz, 1H), 2.25 (s, 3H), 1.43 (s, 18H) ppm; **<sup>13</sup>C NMR** (126 MHz,  $\text{CDCl}_3$ ):  $\delta$  167.48, 164.45, 163.02 (d,  $J = 246.9$  Hz), 144.26,

143.54, 142.34 (d,  $J = 6.8$  Hz), 137.11, 130.23 (d,  $J = 8.1$  Hz), 129.78, 128.63, 126.99, 123.49, 121.74 (d,  $J = 2.8$  Hz), 114.93 (d,  $J = 21.2$  Hz), 113.15 (d,  $J = 22.5$  Hz), 73.69, 64.59, 62.35, 58.81, 36.00, 32.03, 21.62 ppm;  $^{19}\text{F}$  NMR (471 MHz,  $\text{CDCl}_3$ ):  $\delta$  -112.00 ppm; **HRMS** (ESI): ( $m/z$ ) calcd for  $\text{C}_{32}\text{H}_{40}\text{FNO}_6\text{S}$  [ $\text{M}+\text{H}$ ] $^+$ : 586.2633, found: 586.2652; **IR**:  $\tilde{\nu} = 3503, 3281, 2962, 2159, 2034, 1716, 1698, 1593, 1488, 1448, 1411, 1394, 1301, 1233, 1161, 1117, 1093, 1009, 814, 793, 770, 664, 566, 552, 511, 503, 493, 481, 462, 449, 442, 437, 431, 421, 408$   $\text{cm}^{-1}$ ; **HPLC**: *er* was determined by HPLC analysis (Chiralpak IC, *i*PrOH/Hexane = 20/80, 1.0 mL/min, 210 nm) Retention time:  $t_{\text{minor}} = 6.98$  min,  $t_{\text{major}} = 10.27$  min, *er* = 97.5:2.5.

### 3g:

#### (1R,2S)-1-(3-fluorophenyl)-3-hydroxy-2-((4-methylphenyl)sulfonamido)propyl 3,5-di-tert-butyl-4-methoxybenzoate

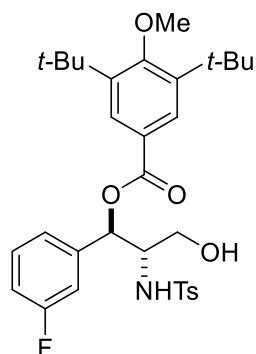

The title compound was synthesized according to the general procedure and isolated by column chromatography (Petroleum ether / EtOAc = 3:1) in 45% yield. Viscous colorless oil;  $[\alpha]_{\text{D}}^{25} = +41.9$  ( $c = 1.0$ ,  $\text{CHCl}_3$ );  $^1\text{H}$  NMR (500 MHz,  $\text{CDCl}_3$ ):  $\delta$  7.94 (s, 2H), 7.53 (d,  $J = 8.4$  Hz, 2H), 7.20 (td,  $J = 7.9, 5.7$  Hz, 1H), 7.16 (d,  $J = 8.1$  Hz, 2H), 7.06 (dt,  $J = 7.7, 1.2$  Hz, 1H), 6.94 – 6.85 (m, 2H), 5.87 (d,  $J = 7.2$  Hz, 1H), 5.44 (d,  $J = 9.2$  Hz, 1H), 3.78 (ddt,  $J = 13.2, 7.1, 3.6$  Hz, 2H), 3.73 – 3.65 (m, 1H), 3.71 (s, 3H), 2.58 (s, 1H), 2.39 (s, 3H), 1.43 (s, 18H) ppm;  $^{13}\text{C}$  NMR (126 MHz,  $\text{CDCl}_3$ ):  $\delta$  166.20, 164.79, 162.79 (d,  $J = 246.9$  Hz), 144.57, 143.62, 139.60 (d,  $J = 7.2$  Hz), 137.19, 130.24 (d,  $J = 8.1$  Hz), 129.78, 128.68, 127.02, 123.34, 123.02 (d,  $J = 2.8$  Hz), 115.45 (d,  $J = 21.2$  Hz), 113.91 (d,  $J = 22.2$  Hz), 74.12, 64.64, 61.27, 58.90, 36.01, 31.95, 21.62 ppm;  $^{19}\text{F}$  NMR (471 MHz,  $\text{CDCl}_3$ ):  $\delta$  -112.06 ppm; **HRMS** (ESI): ( $m/z$ ) calcd for  $\text{C}_{32}\text{H}_{40}\text{FNO}_6\text{S}$  [ $\text{M}+\text{Na}$ ] $^+$ : 608.2452, found: 608.2468; **IR**:  $\tilde{\nu} = 3509, 3284, 2962, 1718, 1616, 1594, 1488, 1451, 1411, 1363, 1331, 1299, 1227, 1158, 1094, 1058, 1007, 963, 888, 813, 786, 663, 551, 522, 472, 452, 409$   $\text{cm}^{-1}$ ; **HPLC**: *er* was determined by HPLC analysis (Chiralpak IA, *i*PrOH/Hexane = 20/80, 1.0 mL/min, 254 nm) Retention time:  $t_{\text{minor}} = 6.04$  min,  $t_{\text{major}} = 6.38$  min, *er* = >99.5:0.5.



**2h:**

**(2R,3S)-3-(3-chlorophenyl)-3-hydroxy-2-((4-methylphenyl)sulfonamido)propyl 3,5-di-tert-butyl-4-methoxybenzoate**

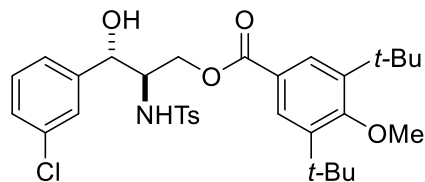

The title compound was synthesized according to the general procedure and isolated by column chromatography (Petroleum ether / EtOAc = 3:1) in 47% yield. Viscous colorless oil;  $[\alpha]_{\text{D}}^{25} = -18.9$  ( $c =$

1.0,  $\text{CHCl}_3$ );  **$^1\text{H NMR}$**  (500 MHz,  $\text{CDCl}_3$ ):  $\delta$  7.80 (s, 2H), 7.62 (d,  $J = 8.4$  Hz, 2H), 7.29 – 7.27 (m, 1H), 7.25 – 7.16 (m, 3H), 7.06 (d,  $J = 8.1$  Hz, 2H), 5.45 (d,  $J = 7.9$  Hz, 1H), 4.87 (t,  $J = 4.6$  Hz, 1H), 4.51 (dd,  $J = 12.0, 7.1$  Hz, 1H), 4.12 (d,  $J = 4.0$  Hz, 1H), 3.81 (tt,  $J = 7.9, 4.2$  Hz, 1H), 3.72 (s, 3H), 3.26 (d,  $J = 4.7$  Hz, 1H), 2.26 (s, 3H), 1.43 (s, 18H) ppm;  **$^{13}\text{C NMR}$**  (126 MHz,  $\text{CDCl}_3$ ):  $\delta$  167.56, 164.49, 144.28, 143.54, 141.79, 137.04, 134.71, 129.93, 129.78, 128.65, 128.18, 126.97, 126.30, 124.35, 123.44, 73.66, 64.60, 62.40, 58.87, 36.00, 32.03, 21.65 ppm; **HRMS** (ESI): ( $m/z$ ) calcd for  $\text{C}_{32}\text{H}_{40}\text{ClNO}_6\text{S}$   $[\text{M}+\text{H}]^+$ : 602.2338, found: 602.2363; **IR**:  $\tilde{\nu} = 3494, 3277, 2962, 1716, 1698, 1598, 1411, 1392, 1301, 1228, 1160, 1117, 1093, 1008, 813, 769, 699, 665, 552$   $\text{cm}^{-1}$ ; **HPLC**: *er* was determined by HPLC analysis (Chiralpak IC, *i*PrOH/Hexane = 20/80, 1.0 mL/min, 210 nm) Retention time:  $t_{\text{minor}} = 7.00$  min,  $t_{\text{major}} = 10.43$  min, *er* = 97.5:2.5.

**3h:**

**(1R,2S)-1-(3-chlorophenyl)-3-hydroxy-2-((4-methylphenyl)sulfonamido)propyl 3,5-di-tert-butyl-4-methoxybenzoate**

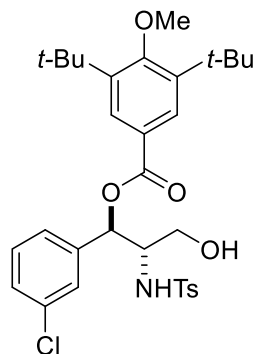

The title compound was synthesized according to the general procedure and isolated by column chromatography (Petroleum ether / EtOAc = 3:1) in 48% yield. Viscous colorless oil;  $[\alpha]_{\text{D}}^{25} = +46.1$  ( $c = 1.0, \text{CHCl}_3$ );  **$^1\text{H NMR}$**  (500 MHz,  $\text{CDCl}_3$ ):  $\delta$  7.94 (s, 2H), 7.53 – 7.47 (m, 2H), 7.18 – 7.11 (m, 6H), 5.83 (d,  $J = 7.5$  Hz, 1H), 5.47 (d,  $J = 9.1$  Hz, 1H), 3.84 – 3.79 (m, 1H), 3.79 – 3.73 (m, 2H), 3.71 (s, 3H), 2.62 (d,  $J = 6.5$  Hz, 1H), 2.39 (s, 3H), 1.43 (s, 18H) ppm;  **$^{13}\text{C NMR}$**  (126 MHz,  $\text{CDCl}_3$ ):  $\delta$  166.23, 164.82, 144.58, 143.59, 139.27, 137.06, 134.61, 129.89, 129.77, 128.70, 128.61, 127.12, 126.96, 125.56, 123.30, 74.00, 64.65, 61.33, 58.98, 36.01, 31.95,

21.68 ppm; **HRMS** (ESI): ( $m/z$ ) calcd for  $C_{32}H_{40}ClNO_6S$   $[M+H]^+$ : 602.2338, found: 602.2353; **IR**:  $\tilde{\nu} = 3503, 3279, 2961, 1719, 1598, 1576, 1447, 1410, 1363, 1331, 1297, 1227, 1158, 1134, 1094, 1059, 1007, 888, 813, 786, 767, 696, 665, 550\text{ cm}^{-1}$ ; **HPLC**: *er* was determined by HPLC analysis (Chiralpak IA, *i*PrOH/Hexane = 20/80, 1.0 mL/min, 254 nm) Retention time:  $t_{\text{minor}} = 7.83\text{ min}$ ,  $t_{\text{major}} = 6.46\text{ min}$ , *er* = >99.5:0.5.

**2i:**

**(2R,3S)-3-(3-bromophenyl)-3-hydroxy-2-((4-methylphenyl)sulfonamido)propyl 3,5-di-tert-butyl-4-methoxybenzoate**

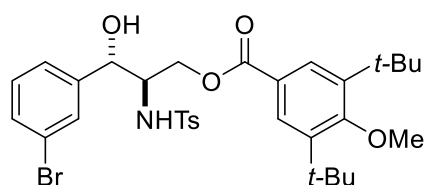

The title compound was synthesized according to the general procedure and isolated by column chromatography (Petroleum ether / EtOAc = 3:1) in 46% yield. Viscous colorless oil;  $[\alpha]_D^{25} = -16.6$  ( $c =$

1.0,  $CHCl_3$ );  **$^1H$  NMR** (500 MHz,  $CDCl_3$ ):  $\delta$  7.80 (s, 2H), 7.62 (d,  $J = 8.3\text{ Hz}$ , 2H), 7.43 (s, 1H), 7.34 (dt,  $J = 8.0, 1.4\text{ Hz}$ , 1H), 7.25 – 7.22 (m, 1H), 7.19 – 7.12 (m, 1H), 7.06 (d,  $J = 8.1\text{ Hz}$ , 2H), 5.44 (d,  $J = 8.0\text{ Hz}$ , 1H), 4.86 (t,  $J = 4.6\text{ Hz}$ , 1H), 4.52 (dd,  $J = 12.0, 7.1\text{ Hz}$ , 1H), 4.11 (dd,  $J = 12.0, 4.0\text{ Hz}$ , 1H), 3.81 (tt,  $J = 7.9, 4.2\text{ Hz}$ , 1H), 3.72 (s, 3H), 3.26 (d,  $J = 4.7\text{ Hz}$ , 1H), 2.26 (s, 3H), 1.43 (s, 18H) ppm;  **$^{13}C$  NMR** (126 MHz,  $CDCl_3$ ):  $\delta$  167.57, 164.50, 144.29, 143.54, 142.07, 137.06, 131.12, 130.21, 129.79, 129.22, 128.66, 126.98, 124.83, 123.45, 122.94, 73.61, 64.60, 62.41, 58.89, 36.01, 32.04, 21.67 ppm; **HRMS** (ESI): ( $m/z$ ) calcd for  $C_{32}H_{40}BrNO_6S$   $[M+Na]^+$ : 668.1652, found: 668.1674; **IR**:  $\tilde{\nu} = 3471, 3279, 2957, 2924, 2854, 1717, 1662, 1597, 1571, 1465, 1301, 1233, 1160, 1117, 1093, 1009, 888, 813, 769, 664, 551\text{ cm}^{-1}$ ; **HPLC**: *er* was determined by HPLC analysis (Chiralpak IC, *i*PrOH/Hexane = 20/80, 1.0 mL/min, 210 nm) Retention time:  $t_{\text{minor}} = 7.07\text{ min}$ ,  $t_{\text{major}} = 10.69\text{ min}$ , *er* = 98:2.

**3i:**

**(1R,2S)-1-(3-bromophenyl)-3-hydroxy-2-((4-methylphenyl)sulfonamido)propyl 3,5-di-tert-butyl-4-methoxybenzoate**

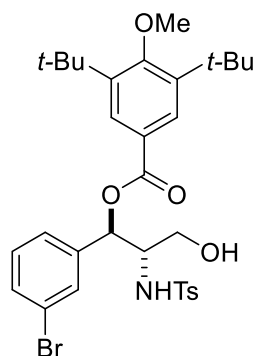

The title compound was synthesized according to the general procedure and isolated by column chromatography (Petroleum ether / EtOAc = 3:1) in 48% yield. Viscous colorless oil;  $[\alpha]_D^{19} = +42.9$  ( $c = 1.0$ ,  $\text{CHCl}_3$ );  $^1\text{H NMR}$  (500 MHz,  $\text{CDCl}_3$ ):  $\delta$  7.94 (s, 2H), 7.50 (d,  $J = 8.2$  Hz, 2H), 7.32 (dt,  $J = 3.7, 1.8$  Hz, 2H), 7.21 (dt,  $J = 7.8, 1.3$  Hz, 1H), 7.16 (d,  $J = 8.0$  Hz, 2H), 7.09 (t,  $J = 8.1$  Hz, 1H), 5.82 (d,  $J = 7.5$  Hz, 1H), 5.51 – 5.42 (m, 1H), 3.81 (dt,  $J = 7.8, 3.7$  Hz, 1H), 3.79 – 3.73 (m, 2H), 3.71 (s, 3H), 2.62 (dq,  $J = 11.2, 5.3, 4.6$  Hz, 1H), 2.40 (s, 3H), 1.43 (s, 18H) ppm;  $^{13}\text{C NMR}$  (126 MHz,  $\text{CDCl}_3$ ):  $\delta$  166.26, 164.84, 144.61, 143.59, 139.55, 137.08, 131.53, 130.17, 130.06, 129.80, 128.71, 126.98, 126.00, 123.30, 122.84, 73.97, 64.65, 61.32, 59.04, 36.03, 31.96, 21.73 ppm; **HRMS** (ESI): ( $m/z$ ) calcd for  $\text{C}_{32}\text{H}_{40}\text{BrNO}_6\text{S}$   $[\text{M}+\text{Na}]^+$ : 668.1652, found: 668.1667; **IR**:  $\tilde{\nu} = 3276, 2959, 1717, 1597, 1572, 1447, 1410, 1363, 1328, 1296, 1224, 1156, 1133, 1117, 1093, 1058, 1005, 908, 888, 813, 784, 755, 695, 680, 665, 550, 443$   $\text{cm}^{-1}$ ; **HPLC**: *er* was determined by HPLC analysis (Chiralpak IA,  $i$ PrOH/Hexane = 20/80, 1.0 mL/min, 254 nm) Retention time:  $t_{\text{minor}} = 5.97$  min,  $t_{\text{major}} = 6.66$  min, *er* = >99.5:0.5.

**2j:**

**(2R,3S)-3-hydroxy-3-(3-methoxyphenyl)-2-((4-methylphenyl)sulfonamido)propyl 3,5-di-tert-butyl-4-methoxybenzoate**

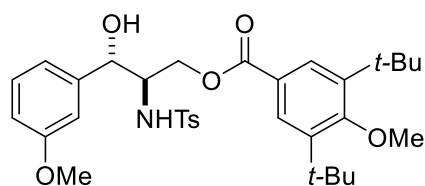

The title compound was synthesized according to the general procedure and isolated by column chromatography (Petroleum ether / EtOAc = 3:1) in 46% yield. Viscous colorless oil;  $[\alpha]_D^{25} = -29.7$  ( $c = 1.0$ ,  $\text{CHCl}_3$ );  $^1\text{H NMR}$  (500 MHz,  $\text{CDCl}_3$ ):  $\delta$  7.82 (s, 2H), 7.64 (d,  $J = 8.3$  Hz, 2H), 7.22 (t,  $J = 7.9$  Hz, 1H), 7.06 (d,  $J = 8.0$  Hz, 2H), 6.89 – 6.85 (m, 1H), 6.84 (t,  $J = 2.2$  Hz, 1H), 6.78 (ddd,  $J = 8.2, 2.6, 0.9$  Hz, 1H), 5.37 (d,  $J = 7.8$  Hz, 1H), 4.89 (t,  $J = 4.4$  Hz, 1H), 4.47 (dd,  $J = 11.9, 7.2$  Hz, 1H), 4.11 (dd,  $J = 11.9, 4.1$  Hz, 1H), 3.88 – 3.80 (m, 1H), 3.75 (s, 3H), 3.71 (s, 3H), 3.05 (d,  $J = 4.7$  Hz, 1H), 2.26 (s, 3H), 1.43 (s, 18H) ppm;  $^{13}\text{C NMR}$  (126 MHz,  $\text{CDCl}_3$ ):  $\delta$  167.40, 164.38, 159.95, 144.23, 143.39, 141.19, 137.31, 129.79, 129.72,

128.63, 127.03, 123.67, 118.36, 113.76, 111.40, 74.06, 64.58, 62.54, 58.77, 55.29, 36.00, 32.04, 21.62 ppm; **HRMS** (ESI): ( $m/z$ ) calcd for  $C_{33}H_{43}NO_7S$   $[M+Na]^+$ : 620.2652, found: 620.2667; **IR**:  $\tilde{\nu}$  = 3487, 3280, 2960, 1716, 1599, 1489, 1455, 1411, 1393, 1301, 1234, 1160, 1117, 1093, 1045, 1008, 813, 770, 665, 551  $cm^{-1}$ ; **HPLC**: *er* was determined by HPLC analysis (Chiralpak IA, *i*PrOH/Hexane = 20/80, 1.0 mL/min, 210 nm) Retention time:  $t_{minor}$  = 6.30 min,  $t_{major}$  = 7.35 min, *er* = 97.5:2.5.

**3j:**

**(1R,2S)-3-hydroxy-1-(3-methoxyphenyl)-2-((4-methylphenyl)sulfonamido)propyl 3,5-di-tert-butyl-4-methoxybenzoate**

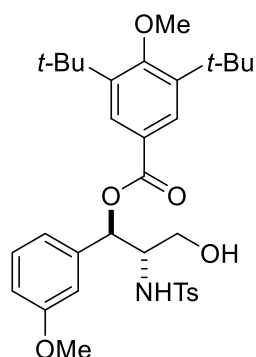

The title compound was synthesized according to the general procedure and isolated by column chromatography (Petroleum ether / EtOAc = 3:1) in 45% yield. Viscous colorless oil;  $[\alpha]_D^{25}$  = +47.0 ( $c$  = 1.0,  $CHCl_3$ );  **$^1H$  NMR** (500 MHz,  $CDCl_3$ ):  $\delta$  7.95 (s, 2H), 7.55 (d,  $J$  = 8.3 Hz, 2H), 7.20 – 7.13 (m, 3H), 6.84 (dt,  $J$  = 7.7, 1.3 Hz, 1H), 6.77 (ddd,  $J$  = 8.3, 2.6, 0.9 Hz, 1H), 6.75 – 6.71 (m, 1H),

5.87 (d,  $J$  = 6.4 Hz, 1H), 5.33 (d,  $J$  = 8.9 Hz, 1H), 3.82 – 3.74 (m, 2H), 3.74 – 3.65 (m, 1H), 3.72 (s, 3H), 3.71 (s, 3H), 2.49 (dd,  $J$  = 8.1, 4.4 Hz, 1H), 2.38 (s, 3H), 1.43 (s, 18H) ppm;  **$^{13}C$  NMR** (126 MHz,  $CDCl_3$ ):  $\delta$  166.29, 164.66, 159.78, 144.46, 143.45, 138.40, 137.32, 129.82, 129.73, 128.69, 127.09, 123.57, 119.25, 114.28, 112.17, 74.89, 64.62, 61.37, 59.03, 55.18, 36.00, 31.97, 21.64 ppm; **HRMS** (ESI): ( $m/z$ ) calcd for  $C_{33}H_{43}NO_7S$   $[M+Na]^+$ : 620.2652, found: 620.2669; **IR**:  $\tilde{\nu}$  = 3509, 3284, 2961, 1717, 1599, 1491, 1455, 1410, 1363, 1299, 1261, 1227, 1158, 1135, 1116, 1093, 1043, 1008, 866, 811, 759, 702, 664, 551  $cm^{-1}$ ; **HPLC**: *er* was determined by HPLC analysis (Chiralpak IA, *i*PrOH/Hexane = 20/80, 1.0 mL/min, 254 nm) Retention time:  $t_{minor}$  = 7.09 min,  $t_{major}$  = 7.73 min, *er* = 98:2.

**2k:**

**(2R,3S)-3-hydroxy-2-((4-methylphenyl)sulfonamido)-3-(*m*-tolyl)propyl 3,5-di-tert-butyl-4-methoxybenzoate**

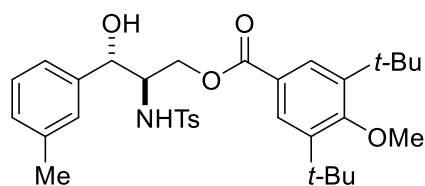

The title compound was synthesized according to the general procedure and isolated by column chromatography (Petroleum ether / EtOAc = 3:1) in 46% yield. Viscous colorless oil;  $[\alpha]_D^{26} = -22.1$  ( $c =$

0.5,  $\text{CHCl}_3$ );  **$^1\text{H NMR}$**  (500 MHz,  $\text{CDCl}_3$ ):  $\delta$  7.82 (s, 2H), 7.65 (d,  $J = 8.0$  Hz, 2H), 7.20 (t,  $J = 7.7$  Hz, 1H), 7.11 – 7.03 (m, 5H), 5.33 (d,  $J = 7.9$  Hz, 1H), 4.87 (t,  $J = 4.3$  Hz, 1H), 4.46 (dd,  $J = 11.9, 7.1$  Hz, 1H), 4.12 (dd,  $J = 11.9, 4.2$  Hz, 1H), 3.85 (tt,  $J = 7.8, 4.2$  Hz, 1H), 3.72 (s, 3H), 2.95 (d,  $J = 4.6$  Hz, 1H), 2.30 (s, 3H), 2.26 (s, 3H), 1.44 (s, 18H) ppm;  **$^{13}\text{C NMR}$**  (126 MHz,  $\text{CDCl}_3$ ):  $\delta$  167.38, 164.37, 144.22, 143.35, 139.46, 138.46, 137.41, 129.71, 128.90, 128.65, 128.62, 127.04, 126.65, 123.69, 123.16, 74.21, 64.58, 62.54, 58.78, 36.00, 32.05, 21.63, 21.60 ppm; **HRMS** (ESI): ( $m/z$ ) calcd for  $\text{C}_{33}\text{H}_{43}\text{NO}_6\text{S}$   $[\text{M}+\text{Na}]^+$ : 604.2703, found: 604.2723; **IR**:  $\tilde{\nu} = 3501, 3284, 2960, 2925, 1716, 1597, 1448, 1410, 1393, 1301, 1233, 1161, 1117, 1093, 1007, 814, 769, 665, 551, 404$   $\text{cm}^{-1}$ ; **HPLC**: *er* was determined by HPLC analysis (Chiralpak IC, *i*PrOH/Hexane = 20/80, 1.0 mL/min, 210 nm) Retention time:  $t_{\text{minor}} = 8.97$  min,  $t_{\text{major}} = 17.77$  min, *er* = 99:1.

**3k:**

**(1R,2S)-3-hydroxy-2-((4-methylphenyl)sulfonamido)-1-(*m*-tolyl)propyl 3,5-di-tert-butyl-4-methoxybenzoate**

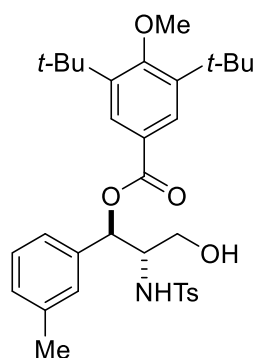

The title compound was synthesized according to the general procedure and isolated by column chromatography (Petroleum ether / EtOAc = 3:1) in 45% yield. Viscous colorless oil;  $[\alpha]_D^{25} = +40.8$  ( $c = 1.0, \text{CHCl}_3$ );  **$^1\text{H NMR}$**  (500 MHz,  $\text{CDCl}_3$ ):  $\delta$  7.95 (s, 2H), 7.55 (d,  $J = 8.0$  Hz, 2H), 7.15 (dd,  $J = 12.3, 7.8$  Hz, 3H), 7.05 (d,  $J = 7.7$  Hz, 2H), 7.00 (s, 1H), 5.85 (d,  $J = 6.3$  Hz, 1H), 5.28 (d,  $J = 8.9$  Hz, 1H), 3.77 (dq,  $J = 12.8, 4.0$  Hz, 2H), 3.73 – 3.64 (m, 1H), 3.71 (s, 3H), 2.43 (d,  $J = 6.1$  Hz, 1H), 2.38 (s, 3H), 2.27 (s, 3H), 1.44 (s, 18H) ppm;  **$^{13}\text{C NMR}$**  (126 MHz,  $\text{CDCl}_3$ ):  $\delta$  166.39, 164.64, 144.47, 143.41, 138.40, 137.38, 136.80, 129.73, 129.32, 128.71, 127.60, 127.13, 123.92, 123.62, 75.17, 64.63, 61.32, 59.16, 36.02, 31.97, 21.65, 21.54

ppm; **HRMS** (ESI): ( $m/z$ ) calcd for  $C_{33}H_{43}NO_6S$   $[M+Na]^+$ : 604.2703, found: 604.2726; **IR**:  $\tilde{\nu} = 3286, 2960, 1717, 1597, 1448, 1411, 1300, 1228, 1158, 1136, 1117, 1094, 1059, 1009, 811, 770, 705, 662, 553$   $cm^{-1}$ ; **HPLC**: *er* was determined by HPLC analysis (Chiralpak IA, *i*PrOH/Hexane = 20/80, 1.0 mL/min, 254 nm) Retention time:  $t_{minor} = 5.58$  min,  $t_{major} = 6.58$  min, *er* = 99.5:0.5.

## 2I

### (2R,3S)-3-(2-fluorophenyl)-3-hydroxy-2-((4-methylphenyl)sulfonamido)propyl 3,5-di-tert-butyl-4-methoxybenzoate

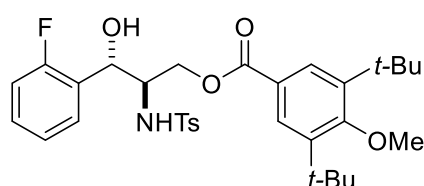

The title compound was synthesized according to the general procedure and isolated by column chromatography (Petroleum ether / EtOAc = 3:1) in 48% yield. Viscous colorless oil;  $[\alpha]_D^{25} = -35.4$  ( $c =$

1.0,  $CHCl_3$ );  **$^1H$  NMR** (500 MHz,  $CDCl_3$ ):  $\delta$  7.83 (s, 2H), 7.67 – 7.62 (m, 2H), 7.46 (td,  $J = 7.5, 1.8$  Hz, 1H), 7.22 (tdd,  $J = 7.6, 5.2, 1.8$  Hz, 1H), 7.12 – 7.04 (m, 3H), 6.96 (ddd,  $J = 10.5, 8.2, 1.2$  Hz, 1H), 5.37 (d,  $J = 8.1$  Hz, 1H), 5.16 (t,  $J = 4.9$  Hz, 1H), 4.46 (dd,  $J = 11.9, 6.7$  Hz, 1H), 4.14 (dd,  $J = 11.9, 3.7$  Hz, 1H), 3.96 – 3.88 (m, 1H), 3.72 (s, 3H), 3.15 (d,  $J = 5.1$  Hz, 1H), 2.28 (s, 3H), 1.44 (s, 18H) ppm;  **$^{13}C$  NMR** (126 MHz,  $CDCl_3$ ):  $\delta$  167.40, 164.43, 159.60 (d,  $J = 245.4$  Hz), 144.27, 143.39, 137.14, 129.75, 129.60 (d,  $J = 8.2$  Hz), 128.64, 127.79 (d,  $J = 4.0$  Hz), 127.09, 126.87 (d,  $J = 13.2$  Hz), 124.60 (d,  $J = 3.3$  Hz), 123.60, 115.36 (d,  $J = 21.7$  Hz), 68.10, 64.59, 62.99, 57.59, 36.00, 32.03, 21.63 ppm;  **$^{19}F$  NMR** (471 MHz,  $CDCl_3$ ):  $\delta$  -117.56 ppm; **HRMS** (ESI): ( $m/z$ ) calcd for  $C_{32}H_{40}FNO_6S$   $[M+H]^+$ : 586.2633, found: 586.2644; **IR**:  $\tilde{\nu} = 3481, 3279, 2960, 2925, 1716, 1598, 1487, 1456, 1411, 1392, 1299, 1226, 1161, 1116, 1092, 1070, 1008, 910, 887, 813, 759, 664, 571, 551, 419$   $cm^{-1}$ ; **HPLC**: *er* was determined by HPLC analysis (Chiralpak IC, *i*PrOH/Hexane = 20/80, 1.0 mL/min, 210 nm) Retention time:  $t_{minor} = 8.89$  min,  $t_{major} = 13.17$  min, *er* = 99:1.

## 3I

### (1R,2S)-1-(2-fluorophenyl)-3-hydroxy-2-((4-methylphenyl)sulfonamido)propyl 3,5-di-

### tert-butyl-4-methoxybenzoate

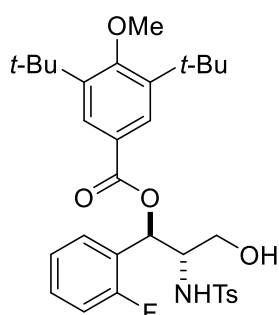

The title compound was synthesized according to the general procedure and isolated by column chromatography (Petroleum ether / EtOAc = 3:1) in 48% yield. Viscous colorless oil; **<sup>1</sup>H NMR** (500 MHz, CDCl<sub>3</sub>): δ 7.96 (s, 2H), 7.58 – 7.52 (m, 2H), 7.32 (td, *J* = 7.4, 1.8 Hz, 1H), 7.22 (dt, *J* = 8.2, 2.2 Hz, 1H), 7.15 (d, *J* = 8.3 Hz, 2H), 7.05 (dd, *J* = 7.5, 1.2 Hz, 1H), 6.92 (ddd, *J* = 9.6, 8.3, 1.1 Hz, 1H), 6.13 (s, 1H), 5.35 (d, *J* = 9.5 Hz, 1H), 3.91 (ddt, *J* = 9.5, 7.4, 3.4 Hz, 1H), 3.77 (dt, *J* = 12.0, 3.8 Hz, 1H), 3.71 (s, 3H), 3.65 (ddd, *J* = 11.5, 7.9, 3.3 Hz, 1H), 2.57 (dd, *J* = 8.3, 4.6 Hz, 1H), 2.38 (s, 3H), 1.43 (s, 18H) ppm; **<sup>13</sup>C NMR** (126 MHz, CDCl<sub>3</sub>): δ 165.52 (d, *J* = 184.1 Hz), 160.35 (d, *J* = 247.5 Hz), 144.56, 143.41, 137.42, 130.18 (d, *J* = 8.3 Hz), 129.76, 128.76, 128.63, 128.60, 127.03, 124.43 (d, *J* = 13.0 Hz), 124.41 (d, *J* = 3.7 Hz), 123.34, 115.81 (d, *J* = 21.6 Hz), 69.52, 64.64, 61.28, 57.96, 36.02, 31.96, 21.64 ppm; **<sup>19</sup>F NMR** (471 MHz, CDCl<sub>3</sub>): δ -116.54 ppm; **HRMS** (ESI): (*m/z*) calcd for C<sub>32</sub>H<sub>40</sub>FNO<sub>6</sub>S [M+Na]<sup>+</sup>: 608.2452, found: 608.2480; **IR**:  $\tilde{\nu}$  = 3510, 3274, 2961, 1720, 1597, 1493, 1457, 1411, 1363, 1332, 1298, 1225, 1158, 1134, 1093, 1059, 1005, 910, 888, 813, 758, 706, 666, 551 cm<sup>-1</sup>;

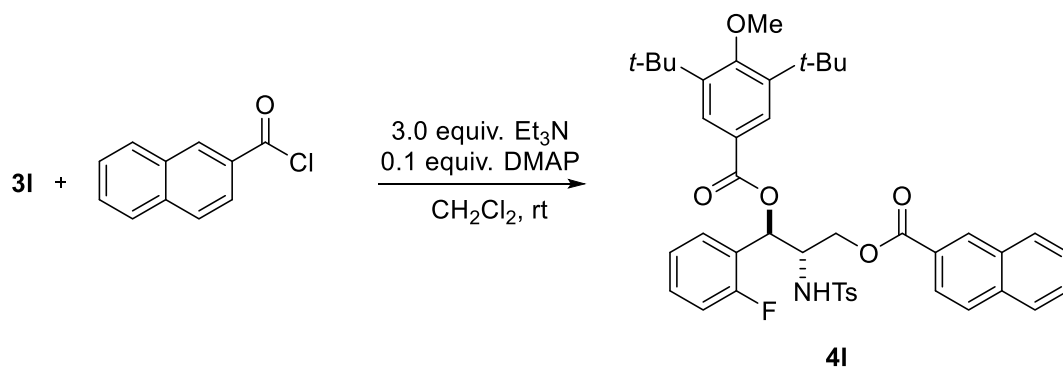

To a solution of **3I** in CH<sub>2</sub>Cl<sub>2</sub> (2 mL) was added 2-Naphthoyl chloride (1.5 equiv.), Et<sub>3</sub>N (3.0 equiv.) and DMAP (0.1 equiv.) successively. The reaction was stirred at rt for 5 h. The solvent was removed under reduced pressure and the crude products were purified by column chromatography.

**4l:**

**(2S,3R)-3-((3,5-di-tert-butyl-4-methoxybenzoyl)oxy)-3-(2-fluorophenyl)-2-((4-methylphenyl)sulfonamido)propyl 2-naphthoate**

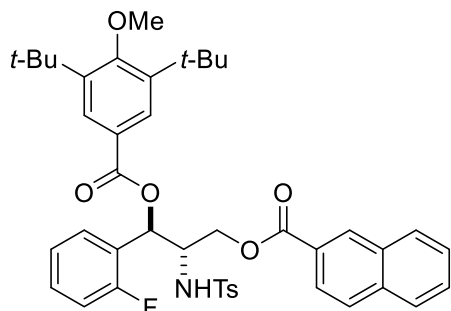

The title compound was isolated by column chromatography (Petroleum ether / EtOAc = 8:1) in 42% yield (2 steps). Viscous colorless oil;  $[\alpha]_D^{20} = +15.1$  ( $c = 0.5$ ,  $\text{CHCl}_3$ );  **$^1\text{H NMR}$**  (500 MHz,  $\text{CDCl}_3$ ):  $\delta$  8.31 (s, 1H), 8.05 (s, 2H), 7.87 (dd,  $J = 8.2, 4.6$  Hz, 2H), 7.83 – 7.78 (m, 2H), 7.64 – 7.58

(m, 3H), 7.54 (t,  $J = 7.5$  Hz, 1H), 7.47 (t,  $J = 7.4$  Hz, 1H), 7.29 – 7.25 (m, 1H), 7.12 (t,  $J = 7.6$  Hz, 1H), 7.00 (dd,  $J = 16.2, 8.5$  Hz, 3H), 6.40 (d,  $J = 4.5$  Hz, 1H), 5.21 (d,  $J = 8.9$  Hz, 1H), 4.58 (dd,  $J = 11.1, 5.9$  Hz, 1H), 4.45 – 4.35 (m, 2H), 3.69 (s, 3H), 2.07 (s, 3H), 1.44 (s, 18H) ppm;  **$^{13}\text{C NMR}$**  (126 MHz,  $\text{CDCl}_3$ ):  $\delta$  166.47, 165.61, 164.64, 160.00 (d,  $J = 247.2$  Hz), 144.48, 143.38, 137.72, 135.74, 132.40, 131.51, 130.31 (d,  $J = 8.3$  Hz), 129.70, 129.59, 128.80, 128.60, 128.22 (d,  $J = 3.4$  Hz), 128.17, 127.86, 126.87, 126.84, 126.45, 125.29, 124.71 (d,  $J = 3.4$  Hz), 124.07 (d,  $J = 13.1$  Hz), 123.54, 115.93 (d,  $J = 21.4$  Hz), 70.05, 64.60, 63.19, 56.16, 36.03, 31.99, 21.35 ppm;  **$^{19}\text{F NMR}$**  (471 MHz,  $\text{CDCl}_3$ ):  $\delta$  -116.22 ppm; **HRMS** (ESI): ( $m/z$ ) calcd for  $\text{C}_{43}\text{H}_{46}\text{FNO}_7\text{S}$   $[\text{M}+\text{H}]^+$ : 740.3052, found: 740.3085; **IR**:  $\tilde{\nu} = 3275, 2959, 2926, 1721, 1631, 1598, 1490, 1458, 1393, 1337, 1281, 1224, 1196, 1162, 1130, 1117, 1093, 1006, 913, 888, 866, 812, 778, 762, 665, 551, 501, 475$   $\text{cm}^{-1}$ ; **HPLC**: *er* was determined by HPLC analysis (Chiralpak IA, *i*PrOH/Hexane = 20/80, 1.0 mL/min, 210 nm) Retention time:  $t_{\text{minor}} = 12.94$  min,  $t_{\text{major}} = 13.99$  min, *er* = 99:1.

**2m:**

**(2R,3S)-3-(2-chlorophenyl)-3-hydroxy-2-(methylsulfonamido)propyl 3,5-di-tert-butyl-4-methoxybenzoate**

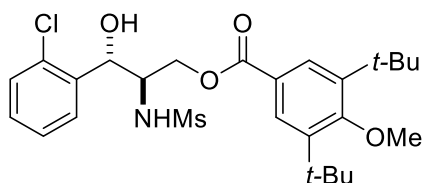

The title compound was synthesized according to the general procedure and isolated by column chromatography (Petroleum ether / EtOAc = 2:1) in 46% yield. Viscous colorless oil;  $[\alpha]_D^{25} = -6.7$  ( $c = 1.0$ ,



CHCl<sub>3</sub>); **<sup>1</sup>H NMR** (500 MHz, CDCl<sub>3</sub>): δ 7.92 (s, 2H), 7.69 (dd, *J* = 7.7, 1.7 Hz, 1H), 7.40 – 7.31 (m, 2H), 7.28 – 7.22 (m, 1H), 5.42 – 5.36 (m, 1H), 5.16 (d, *J* = 9.4 Hz, 1H), 4.60 (dd, *J* = 11.8, 6.5 Hz, 1H), 4.32 (dd, *J* = 11.7, 3.5 Hz, 1H), 4.14 (dtd, *J* = 9.6, 6.2, 3.5 Hz, 1H), 3.70 (s, 3H), 3.10 (d, *J* = 4.4 Hz, 1H), 2.65 (s, 3H), 1.43 (s, 18H) ppm; **<sup>13</sup>C NMR** (126 MHz, CDCl<sub>3</sub>): δ 167.33, 164.50, 144.44, 138.05, 132.61, 129.73, 129.62, 128.59, 128.14, 127.60, 123.65, 70.76, 64.60, 63.80, 57.58, 41.57, 36.03, 32.02 ppm; **HRMS** (ESI): (*m/z*) calcd for C<sub>32</sub>H<sub>40</sub>ClNO<sub>6</sub>S [M+Na]<sup>+</sup>: 548.1844, found: 548.1869; **IR**:  $\tilde{\nu}$  = 3488, 3282, 2962, 1716, 1443, 1411, 1392, 1363, 1301, 1228, 1154, 1116, 1033, 1007, 757, 525, 472, 449, 419 cm<sup>-1</sup>; **HPLC**: *er* was determined by HPLC analysis (Chiralpak IC, *i*PrOH/Hexane = 20/80, 1.0 mL/min, 254 nm) Retention time: *t*<sub>minor</sub> = 8.23 min, *t*<sub>major</sub> = 15.50 min, *er* = 98.5:1.5.

### 3m:

#### (1R,2S)-1-(2-chlorophenyl)-3-hydroxy-2-(methylsulfonamido)propyl 3,5-di-*tert*-butyl-4-methoxybenzoate

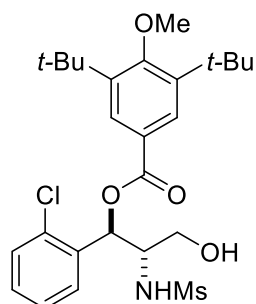

The title compound was synthesized according to the general procedure and isolated by column chromatography (Petroleum ether / EtOAc = 2:1) in 50% yield. Viscous colorless oil;  $[\alpha]_D^{24}$  = +61.4 (*c* = 1.0, CHCl<sub>3</sub>); **<sup>1</sup>H NMR** (500 MHz, CDCl<sub>3</sub>): δ 8.00 (s, 2H), 7.58 (dd, *J* = 7.7, 1.8 Hz, 1H), 7.43 (dd, *J* = 7.9, 1.4 Hz, 1H), 7.34 (td, *J* = 7.6, 1.4 Hz, 1H), 7.29 (td, *J* = 7.6, 1.8 Hz, 1H), 6.44 (d, *J* = 8.5 Hz, 1H), 5.29 (d, *J* = 9.7 Hz, 1H), 4.16 – 4.05 (m, 1H), 3.91 (dt, *J* = 11.7, 3.4 Hz, 1H), 3.86 (td, *J* = 9.0, 7.8, 5.1 Hz, 1H), 3.72 (s, 3H), 2.66 (d, *J* = 6.4 Hz, 1H), 2.40 (s, 3H), 1.44 (s, 18H) ppm; **<sup>13</sup>C NMR** (126 MHz, CDCl<sub>3</sub>): δ 166.20, 164.86, 144.65, 135.94, 133.90, 130.11, 130.05, 128.76, 128.69, 127.55, 123.26, 71.17, 64.66, 62.11, 58.96, 41.46, 36.04, 31.96 ppm; **HRMS** (ESI): (*m/z*) calcd for C<sub>32</sub>H<sub>40</sub>ClNO<sub>6</sub>S [M+Na]<sup>+</sup>: 548.1844, found: 548.1863; **IR**:  $\tilde{\nu}$  = 3507, 3284, 2962, 1721, 1596, 1445, 1410, 1363, 1301, 1227, 1152, 1128, 1060, 1007, 888, 804, 760, 519, 419 cm<sup>-1</sup>; **HPLC**: *er* was determined by HPLC analysis (Chiralpak IA, *i*PrOH/Hexane = 20/80, 1.0 mL/min, 254 nm) Retention time: *t*<sub>minor</sub> = 6.00 min, *t*<sub>major</sub> = 5.14 min, *er* = 97.5:2.5.

**2n:**

**(2R,3S)-3-(2-bromophenyl)-3-hydroxy-2-(methylsulfonamido)propyl 3,5-di-tert-butyl-4-methoxybenzoate**

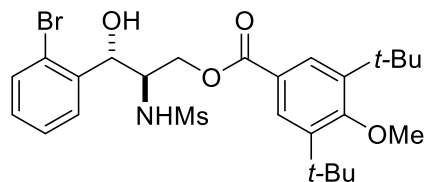

The title compound was synthesized according to the general procedure and isolated by column chromatography (Petroleum ether / EtOAc = 2:1) in 45% yield. Viscous colorless oil;  $[\alpha]_{\text{D}}^{25} = -4.7$  ( $c = 0.5$ ,  $\text{CHCl}_3$ );

$^1\text{H NMR}$  (500 MHz,  $\text{CDCl}_3$ ):  $\delta$  7.93 (s, 2H), 7.68 (dd,  $J = 7.8, 1.7$  Hz, 1H), 7.55 (dd,  $J = 8.1, 1.2$  Hz, 1H), 7.38 (td,  $J = 7.6, 1.2$  Hz, 1H), 7.17 (td,  $J = 7.6, 1.7$  Hz, 1H), 5.34 (dd,  $J = 6.0, 4.2$  Hz, 1H), 5.17 (d,  $J = 9.5$  Hz, 1H), 4.60 (dd,  $J = 11.7, 6.4$  Hz, 1H), 4.34 (dd,  $J = 11.7, 3.5$  Hz, 1H), 4.16 (dtd,  $J = 9.6, 6.2, 3.5$  Hz, 1H), 3.70 (s, 3H), 3.10 (d,  $J = 4.3$  Hz, 1H), 2.64 (s, 3H), 1.43 (s, 18H) ppm;  $^{13}\text{C NMR}$  (126 MHz,  $\text{CDCl}_3$ ):  $\delta$  167.31, 164.48, 144.43, 139.69, 133.00, 129.97, 128.59, 128.49, 128.20, 123.68, 122.86, 72.85, 64.59, 63.83, 57.55, 41.66, 36.03, 32.04 ppm; **HRMS** (ESI): ( $m/z$ ) calcd for  $\text{C}_{26}\text{H}_{36}\text{BrNO}_6\text{S}$   $[\text{M}+\text{Na}]^+$ : 592.1339, found: 592.1361; **IR**:  $\tilde{\nu} = 3360, 2958, 2922, 2852, 1716, 1660, 1633, 1470, 1411, 1301, 1232, 1154, 1116, 1008, 767, 528$   $\text{cm}^{-1}$ ; **HPLC**: *er* was determined by HPLC analysis (Chiralpak IC, *i*PrOH/Hexane = 20/80, 1.0 mL/min, 254 nm) Retention time:  $t_{\text{minor}} = 8.66$  min,  $t_{\text{major}} = 15.98$  min, *er* = 99.5:0.5.

**3n:**

**(1R,2S)-1-(2-bromophenyl)-3-hydroxy-2-(methylsulfonamido)propyl 3,5-di-tert-butyl-4-methoxybenzoate**

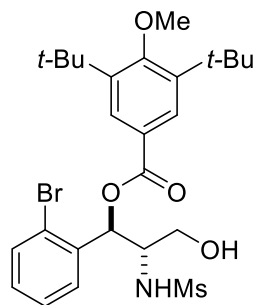

The title compound was synthesized according to the general procedure and isolated by column chromatography (Petroleum ether / EtOAc = 2:1) in 52% yield. Viscous colorless oil;  $[\alpha]_{\text{D}}^{25} = +77.5$  ( $c = 1.0$ ,  $\text{CHCl}_3$ );  $^1\text{H NMR}$  (500 MHz,  $\text{CDCl}_3$ ):  $\delta$  8.00 (s, 2H), 7.61 (dd,  $J = 8.1, 1.3$  Hz, 1H), 7.57 (dd,  $J = 7.8, 1.7$  Hz, 1H), 7.38 (td,  $J = 7.6, 1.3$  Hz, 1H), 7.21 (td,  $J = 7.7, 1.7$  Hz, 1H), 6.42 (d,  $J = 8.5$  Hz, 1H), 5.30 (d,  $J = 9.7$  Hz, 1H), 4.14 – 4.06 (m, 1H), 3.92 (dd,  $J = 11.7, 3.5$  Hz, 1H), 3.86 (d,  $J = 12.2$  Hz, 1H), 3.72 (s, 3H), 2.65 (d,  $J = 6.7$  Hz, 1H), 2.39 (s, 3H), 1.44 (s, 18H) ppm;  $^{13}\text{C NMR}$  (126 MHz,  $\text{CDCl}_3$ ):  $\delta$  166.17, 164.86, 144.66, 137.62, 133.36, 130.33,

128.88, 128.76, 128.17, 124.10, 123.25, 73.18, 64.66, 62.12, 59.11, 41.52, 36.05, 31.97 ppm; **HRMS** (ESI): ( $m/z$ ) calcd for  $C_{26}H_{36}BrNO_6S$   $[M+Na]^+$ : 592.1339, found: 592.1361; **IR**:  $\tilde{\nu}$  = 3496, 3283, 2958, 2925, 2854, 1721, 1595, 1467, 1410, 1363, 1300, 1227, 1152, 1132, 1061, 1007, 888, 805, 759, 680, 525  $cm^{-1}$ ; **HPLC**: *er* was determined by HPLC analysis (Chiralpak IA, *i*PrOH/Hexane = 20/80, 1.0 mL/min, 254 nm) Retention time:  $t_{minor}$  = 6.47 min,  $t_{major}$  = 5.31 min, *er* = 95.5:4.5.

**2o**:

**(2R,3S)-3-hydroxy-2-(methylsulfonamido)-3-(*o*-tolyl)propyl 3,5-di-*tert*-butyl-4-methoxybenzoate**

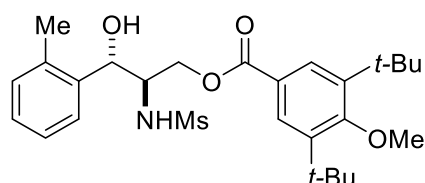

The title compound was synthesized according to the general procedure and isolated by column chromatography (Petroleum ether / EtOAc = 2:1) in 46% yield. Viscous colorless oil; **<sup>1</sup>H NMR** (500 MHz,  $CDCl_3$ ):  $\delta$  7.90 (s, 2H), 7.62 – 7.57 (m, 1H), 7.30 – 7.23 (m, 1H), 7.23 – 7.14 (m, 2H), 5.28 – 5.20 (m, 2H), 4.68 (dd,  $J$  = 11.8, 7.6 Hz, 1H), 4.30 (dd,  $J$  = 11.8, 3.4 Hz, 1H), 4.02 (tt,  $J$  = 8.4, 3.4 Hz, 1H), 3.70 (s, 3H), 2.81 (d,  $J$  = 3.8 Hz, 1H), 2.65 (s, 3H), 2.41 (s, 3H), 1.42 (s, 18H) ppm;

**<sup>13</sup>C NMR** (126 MHz,  $CDCl_3$ ):  $\delta$  167.33, 164.48, 144.48, 138.50, 135.31, 130.93, 128.51, 128.25, 126.62, 126.20, 123.73, 71.95, 64.59, 63.44, 57.72, 41.74, 36.03, 32.02, 19.42 ppm; **HRMS** (ESI): ( $m/z$ ) calcd for  $C_{27}H_{39}NO_6S$   $[M+Na]^+$ : 528.2390, found: 528.2414; **IR**:  $\tilde{\nu}$  = 3280, 3104, 2961, 1717, 1629, 1597, 1547, 1460, 1411, 1392, 1344, 1329, 1296, 1274, 1226, 1153, 1076, 1006, 922, 888, 763, 730, 721, 683, 523  $cm^{-1}$ ;

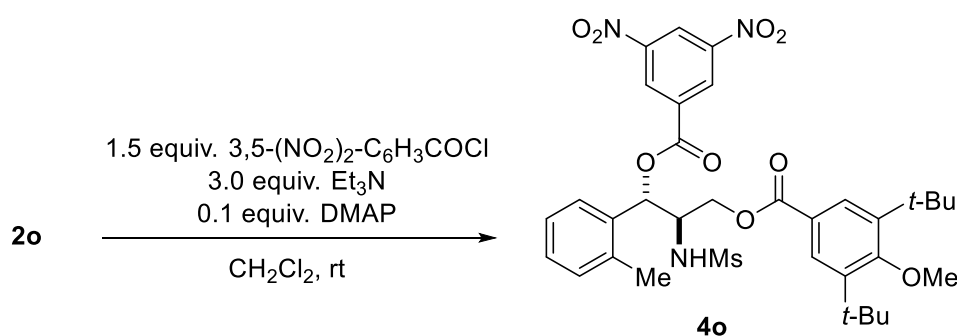

To a solution of **2o** in CH<sub>2</sub>Cl<sub>2</sub> (1 mL) was added 3,5-(NO<sub>2</sub>)<sub>2</sub>-C<sub>6</sub>H<sub>3</sub>COCl (1.5 equiv.), Et<sub>3</sub>N (3.0 equiv.) and DMAP (0.1 equiv.) successively. The reaction was stirred at rt for 5 h. The solvent was removed under reduced pressure and the crude products were purified by column chromatography.

**4o:**

**(2R,3S)-3-((3,5-dinitrobenzoyl)oxy)-2-(methylsulfonamido)-3-(o-tolyl)propyl 3,5-di-tert-butyl-4-methoxybenzoate**

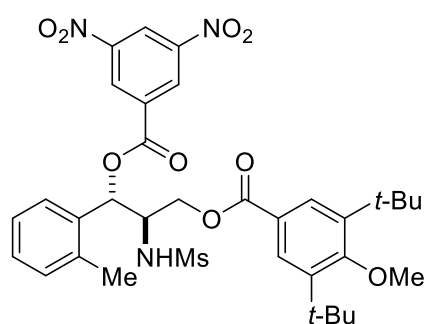

The title compound was isolated by column chromatography (Petroleum ether / EtOAc = 5:1) in 42% yield (2 steps). Viscous colorless oil;  $[\alpha]_D^{21} = -35.0$  ( $c = 1.0$ , CHCl<sub>3</sub>); **<sup>1</sup>H NMR** (500 MHz, CDCl<sub>3</sub>):  $\delta$  9.23 (t,  $J = 2.1$  Hz, 1H), 9.17 (d,  $J = 2.1$  Hz, 2H), 7.92 (s, 2H), 7.61 – 7.56 (m, 1H), 7.34 – 7.28 (m, 2H),

7.28 – 7.23 (m, 1H), 6.46 (d,  $J = 7.1$  Hz, 1H), 4.96 (d,  $J = 8.9$  Hz, 1H), 4.66 – 4.59 (m, 1H), 4.56 – 4.47 (m, 2H), 3.72 (s, 3H), 2.59 (s, 3H), 2.42 (s, 3H), 1.44 (s, 18H) ppm; **<sup>13</sup>C NMR** (126 MHz, CDCl<sub>3</sub>):  $\delta$  166.87, 164.78, 161.60, 148.88, 144.70, 136.98, 134.38, 133.38, 131.26, 129.66, 129.57, 128.56, 127.15, 126.84, 123.23, 122.87, 73.07, 64.65, 63.93, 56.89, 41.73, 36.06, 32.00, 19.72 ppm; **HRMS** (ESI): ( $m/z$ ) calcd for C<sub>34</sub>H<sub>41</sub>N<sub>3</sub>O<sub>11</sub>S [M+Na]<sup>+</sup>: 722.2354, found: 722.2390; **IR**:  $\tilde{\nu} = 3278, 3103, 2961, 1717, 1629, 1596, 1546, 1460, 1411, 1392, 1344, 1329, 1296, 1274, 1226, 1153, 1117, 1076, 1006, 922, 888, 762, 730, 721, 684, 523$  cm<sup>-1</sup>; **HPLC**: *er* was determined by HPLC analysis (Chiralpak IA, *i*PrOH/Hexane = 20/80, 1.0 mL/min, 254 nm) Retention time:  $t_{\text{minor}} = 10.58$  min,  $t_{\text{major}} = 33.23$  min, *er* = 99.5:0.5.

**3o:**

**(1R,2S)-3-hydroxy-2-(methylsulfonamido)-1-(o-tolyl)propyl 3,5-di-tert-butyl-4-methoxybenzoate**

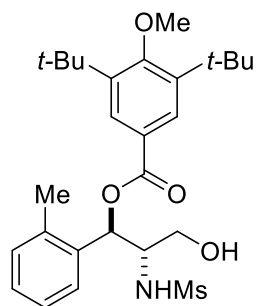

The title compound was synthesized according to the general procedure and isolated by column chromatography (Petroleum ether / EtOAc = 2:1) in 47% yield. Viscous colorless oil; **<sup>1</sup>H NMR** (500 MHz, CDCl<sub>3</sub>): δ 7.97 (s, 2H), 7.52 (dd, *J* = 7.5, 1.6 Hz, 1H), 7.29 – 7.16 (m, 3H), 6.22 (d, *J* = 9.2 Hz, 1H), 5.33 (d, *J* = 9.4 Hz, 1H), 4.03 (tt, *J* = 9.3, 3.1 Hz, 1H), 3.96 (dd, *J* = 11.7, 3.2 Hz, 1H), 3.86 (dd, *J* = 11.7, 3.0 Hz, 1H), 3.71 (s, 3H), 2.72 (s, 1H), 2.54 (s, 3H), 2.16 (s, 3H), 1.43 (s, 18H) ppm; **<sup>13</sup>C NMR** (126 MHz, CDCl<sub>3</sub>): δ 166.53, 164.72, 144.57, 137.03, 136.71, 130.93, 128.77, 128.66, 127.24, 126.65, 123.56, 70.84, 64.65, 62.26, 59.60, 41.25, 36.03, 31.97, 19.80 ppm; **HRMS** (ESI): (*m/z*) calcd for C<sub>27</sub>H<sub>39</sub>NO<sub>6</sub>S [M+Na]<sup>+</sup>: 528.2390, found: 592.2412; **IR**:  $\tilde{\nu}$  = 3278, 3106, 2962, 1723, 1629, 1597, 1547, 1463, 1410, 1345, 1328, 1278, 1226, 1164, 1129, 1076, 1006, 921, 888, 765, 730, 721, 678, 525, 449, 432 cm<sup>-1</sup>;

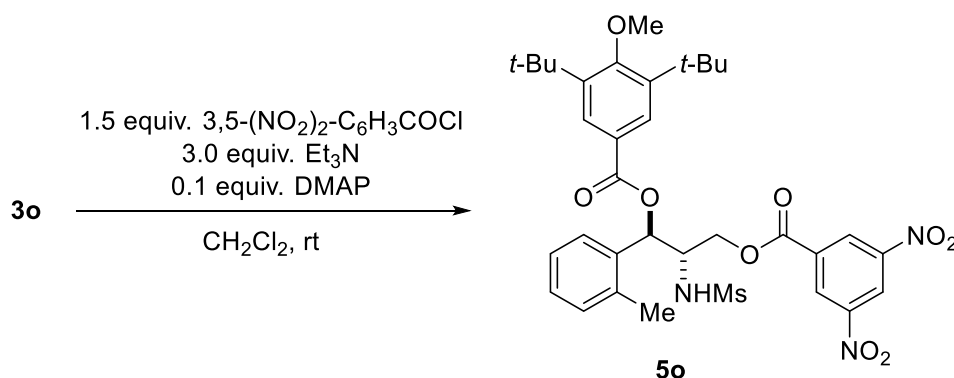

To a solution of **3o** in CH<sub>2</sub>Cl<sub>2</sub> (1 mL) was added 3,5-(NO<sub>2</sub>)<sub>2</sub>-C<sub>6</sub>H<sub>3</sub>COCl (1.5 equiv.), Et<sub>3</sub>N (3.0 equiv.) and DMAP (0.1 equiv.) successively. The reaction was stirred at rt for 5 h. The solvent was removed under reduced pressure and the crude products were purified by column chromatography.

**5o:**  
**(1R,2S)-3-((3,5-dinitrobenzoyl)oxy)-2-(methylsulfonamido)-1-(o-tolyl)propyl 3,5-di-tert-butyl-4-methoxybenzoate**

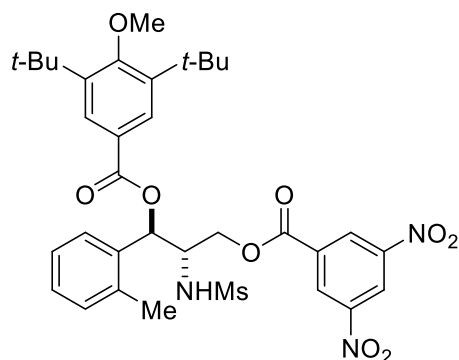

The title compound was isolated by column chromatography (Petroleum ether / EtOAc = 5:1) in 43% yield (2 steps). Viscous colorless oil;  $[\alpha]_D^{21} = +11.3$  ( $c = 0.4$ ,  $\text{CHCl}_3$ );  $^1\text{H NMR}$  (500 MHz,  $\text{CDCl}_3$ ):  $\delta$  9.22 (d,  $J = 2.0$  Hz, 1H), 9.15 (d,  $J = 2.2$  Hz, 2H), 7.99 (s, 2H), 7.51 (d,  $J = 7.3$  Hz, 1H), 7.24 (dt,  $J = 6.1, 3.5$  Hz, 3H), 6.29 (d,  $J = 7.9$  Hz, 1H), 4.96 (d,  $J = 9.5$  Hz, 1H), 4.77 (dd,  $J = 11.6, 3.6$  Hz, 1H), 4.68 (dd,  $J = 11.6, 7.2$  Hz, 1H), 4.54 – 4.47 (m, 1H), 3.72 (s, 3H), 2.59 (s, 3H), 2.36 (s, 3H), 1.45 (s, 18H) ppm;  $^{13}\text{C NMR}$  (126 MHz,  $\text{CDCl}_3$ ):  $\delta$  165.66, 164.90, 162.77, 148.82, 144.79, 136.49, 135.73, 133.31, 131.24, 129.85, 129.13, 128.60, 126.95, 126.63, 123.32, 122.79, 71.75, 65.92, 64.69, 57.05, 41.79, 36.07, 31.99, 19.71 ppm; **HRMS** (ESI): ( $m/z$ ) calcd for  $\text{C}_{34}\text{H}_{41}\text{N}_3\text{O}_{11}\text{S}$   $[\text{M}+\text{Na}]^+$ : 722.2354, found: 722.2386; **IR**:  $\tilde{\nu} = 3277, 3104, 2961, 2928, 1723, 1668, 1629, 1597, 1547, 1463, 1410, 1345, 1328, 1278, 1226, 1164, 1129, 1076, 1007, 921, 888, 765, 730, 721, 524$   $\text{cm}^{-1}$ ; **HPLC**: *er* was determined by HPLC analysis (Chiralpak IA, *i*PrOH/Hexane = 20/80, 1.0 mL/min, 254 nm) Retention time:  $t_{\text{minor}} = 8.92$  min,  $t_{\text{major}} = 12.67$  min, *er* = 99:1.

**2p** and **3p** were synthesized according to the general procedure (variations: **C6** as the catalyst) and isolated by a short column as a mixture.

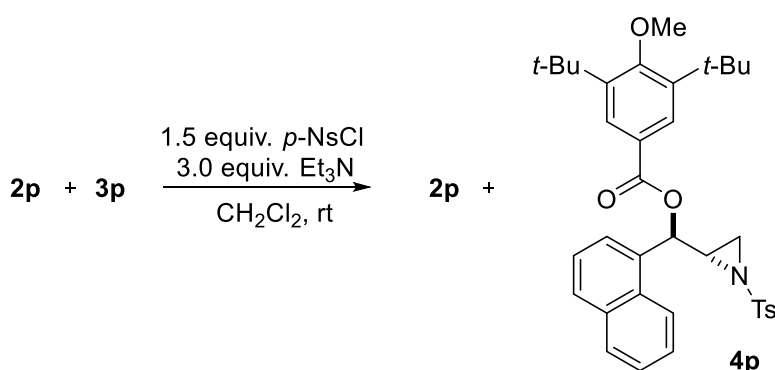

To a solution of the mixture of **2p** and **3p** in  $\text{CH}_2\text{Cl}_2$  (2 mL) was added *p*-NsCl (1.5 equiv.),  $\text{Et}_3\text{N}$  (3.0 equiv.) successively. The reaction was stirred at rt overnight. The solvent was removed under reduced pressure and the crude products were purified and separated (**2p** and **4p**) by column chromatography.

**2p:**

**(2R,3S)-3-hydroxy-2-((4-methylphenyl)sulfonamido)-3-(naphthalen-1-yl)propyl 3,5-di-tert-butyl-4-methoxybenzoate**

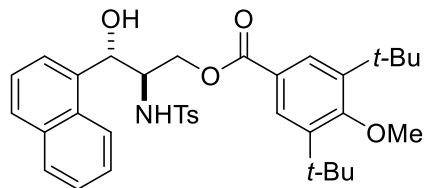

The title compound was isolated by column chromatography (Petroleum ether / EtOAc = 3:1) in 45% yield. Viscous colorless oil;  $[\alpha]_D^{19} = +31.0$  ( $c = 1.0$ ,  $\text{CHCl}_3$ );  **$^1\text{H NMR}$**  (500 MHz,  $\text{CDCl}_3$ ):  $\delta$  8.08 (dd,  $J = 8.6, 2.6$  Hz, 1H), 7.88 (dd,  $J = 8.2, 1.5$  Hz, 1H), 7.78 (d,  $J = 8.2$  Hz, 1H), 7.74 (d,  $J = 5.3$  Hz, 3H), 7.68 – 7.62 (m, 2H), 7.55 (dddd,  $J = 23.4, 7.9, 6.8, 1.3$  Hz, 2H), 7.46 (t,  $J = 7.7$  Hz, 1H), 6.94 (d,  $J = 8.0$  Hz, 2H), 5.93 – 5.85 (m, 2H), 4.69 (ddd,  $J = 11.9, 7.6, 2.2$  Hz, 1H), 4.05 – 3.96 (m, 2H), 3.70 (s, 3H), 3.02 (dd,  $J = 13.3, 4.0$  Hz, 1H), 2.17 (s, 3H), 1.41 (s, 18H) ppm;  **$^{13}\text{C NMR}$**  (126 MHz,  $\text{CDCl}_3$ ):  $^{13}\text{C NMR}$  (126 MHz,  $\text{CDCl}_3$ )  $\delta$  167.73, 164.31, 144.15, 143.22, 137.10, 135.30, 133.78, 130.18, 129.62, 129.12, 128.68, 128.63, 127.06, 126.75, 125.92, 125.55, 123.87, 123.65, 122.99, 72.34, 64.55, 62.50, 57.75, 35.98, 32.05, 21.60 ppm; **HRMS** (ESI): ( $m/z$ ) calcd for  $\text{C}_{36}\text{H}_{43}\text{NO}_6\text{S}$   $[\text{M}+\text{Na}]^+$ : 640.2703, found: 640.2730; **IR**:  $\tilde{\nu} = 3488, 3283, 2961, 1698, 1598, 1466, 1410, 1302, 1238, 1160, 1117, 1092, 1007, 803, 781, 664, 551$   $\text{cm}^{-1}$ ; **HPLC**: *er* was determined by HPLC analysis (Chiralpak IA, *i*PrOH/Hexane = 20/80, 1.0 mL/min, 254 nm) Retention time:  $t_{\text{minor}} = 9.29$  min,  $t_{\text{major}} = 8.42$  min, *er* = 97:3.

**4p:**

**(R)-naphthalen-1-yl((S)-1-tosylaziridin-2-yl)methyl 3,5-di-tert-butyl-4-methoxybenzoate**

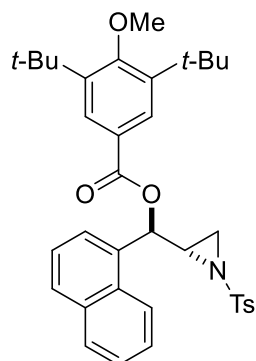

The title compound was isolated by column chromatography (Petroleum ether / EtOAc = 10:1) in 46% yield (2 steps). Viscous colorless oil;  $[\alpha]_D^{20} = +20.7$  ( $c = 1.0$ ,  $\text{CHCl}_3$ );  **$^1\text{H NMR}$**  (500 MHz,  $\text{CDCl}_3$ ):  $\delta$  8.16 – 8.11 (m, 1H), 7.98 (s, 2H), 7.79 – 7.73 (m, 1H), 7.68 (d,  $J = 8.1$  Hz, 1H), 7.50 – 7.43 (m, 3H), 7.35 – 7.21 (m, 3H), 6.72 (d,  $J = 8.0$  Hz, 2H), 6.23 (d,  $J = 7.5$  Hz, 1H), 3.70 (s, 3H), 3.34 (td,  $J = 7.1, 4.3$  Hz, 1H), 2.96 (d,  $J = 6.7$  Hz, 1H), 2.62 (d,  $J = 4.3$  Hz, 1H), 2.25 (s, 3H), 1.43 (s, 18H) ppm;  **$^{13}\text{C NMR}$**  (126 MHz,  $\text{CDCl}_3$ ):  $\delta$  165.65, 164.48, 144.38, 143.98,

133.87, 133.62, 133.23, 130.52, 129.01, 128.97, 128.66, 128.65, 127.36, 126.46, 125.86, 125.63, 125.16, 123.96, 123.81, 73.46, 64.61, 42.69, 36.01, 32.17, 31.98, 21.69 ppm; **HRMS** (ESI): ( $m/z$ ) calcd for  $C_{36}H_{41}NO_5S$   $[M+H]^+$ : 600.2778, found: 600.2808; **IR**:  $\tilde{\nu}$  = 2961, 1719, 1597, 1513, 1451, 1410, 1396, 1363, 1330, 1295, 1225, 1185, 1163, 1128, 1090, 1060, 1006, 981, 946, 896, 800, 778, 756, 714, 696, 677, 584, 563, 438  $cm^{-1}$ ; **HPLC**: *er* was determined by HPLC analysis (Chiralpak IC, *i*PrOH/Hexane = 20/80, 1.0 mL/min, 254 nm) Retention time:  $t_{minor}$  = 21.36 min,  $t_{major}$  = 19.74 min, *er* = 93.5:6.5.

### 2q:

#### (2R,3S)-3-hydroxy-2-((4-methylphenyl)sulfonamido)-3-(naphthalen-2-yl)propyl 3,5-di-tert-butyl-4-methoxybenzoate

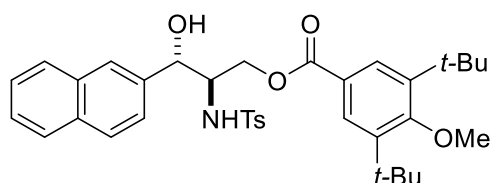

The title compound was synthesized according to the general procedure and isolated by column chromatography (Petroleum ether / EtOAc = 3:1) in 46% yield. Viscous colorless oil;

$[\alpha]_D^{25}$  = -14.7 ( $c$  = 1.0,  $CHCl_3$ );  **$^1H$  NMR** (500 MHz,  $CDCl_3$ ):  $\delta$  7.81 (s, 2H), 7.80 – 7.70 (m, 4H), 7.59 – 7.53 (m, 2H), 7.50 – 7.42 (m, 2H), 7.37 (dd,  $J$  = 8.6, 1.7 Hz, 1H), 6.90 (d,  $J$  = 8.1 Hz, 2H), 5.43 (dd,  $J$  = 8.0, 4.1 Hz, 1H), 5.03 (d,  $J$  = 4.7 Hz, 1H), 4.59 (dd,  $J$  = 11.9, 6.9 Hz, 1H), 4.20 (dd,  $J$  = 12.0, 4.0 Hz, 1H), 3.95 (ddd,  $J$  = 7.5, 5.5, 3.5 Hz, 1H), 3.70 (s, 3H), 3.26 (s, 1H), 2.18 (s, 3H), 1.43 (s, 18H) ppm;  **$^{13}C$  NMR** (126 MHz,  $CDCl_3$ ):  $\delta$  167.55, 164.38, 144.21, 143.28, 137.12, 137.07, 133.22, 133.17, 129.56, 128.63, 128.52, 128.13, 127.76, 126.89, 126.44, 126.26, 125.19, 123.84, 123.56, 74.28, 64.56, 62.79, 58.97, 35.99, 32.03, 21.59 ppm; **HRMS** (ESI): ( $m/z$ ) calcd for  $C_{36}H_{43}NO_6S$   $[M+Na]^+$ : 640.2703, found: 640.2729; **IR**:  $\tilde{\nu}$  = 3493, 3282, 2962, 1715, 1598, 1447, 1411, 1392, 1363, 1301, 1234, 1160, 1117, 1093, 1008, 888, 859, 813, 756, 666, 571, 551, 478  $cm^{-1}$ ; **HPLC**: *er* was determined by HPLC analysis (Chiralpak IC, *i*PrOH/Hexane = 20/80, 1.0 mL/min, 210 nm) Retention time:  $t_{minor}$  = 10.13 min,  $t_{major}$  = 16.40 min, *er* = 90:10.

### 3q:

#### (1R,2S)-3-hydroxy-2-((4-methylphenyl)sulfonamido)-1-(naphthalen-2-yl)propyl 3,5-di-tert-butyl-4-methoxybenzoate



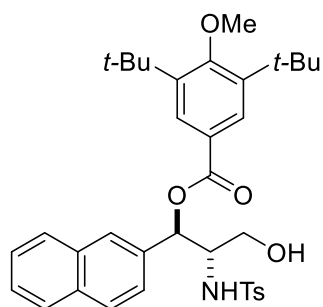

The title compound was synthesized according to the general procedure and isolated by column chromatography (Petroleum ether / EtOAc = 3:1) in 44% yield. Viscous colorless oil;  $[\alpha]_D^{25} = +42.2$  ( $c = 1.0$ ,  $\text{CHCl}_3$ );  **$^1\text{H NMR}$**  (500 MHz,  $\text{CDCl}_3$ ):  $\delta$  7.98 (s, 2H), 7.80 – 7.73 (m, 1H), 7.72 – 7.62 (m, 3H), 7.52 – 7.43 (m, 2H), 7.37 – 7.29 (m, 3H), 6.75 (d,  $J = 8.0$  Hz, 2H), 6.04 (d,  $J = 8.0$  Hz, 1H), 5.51 (d,  $J = 9.3$  Hz, 1H), 3.97 – 3.87 (m, 2H), 3.85 (td,  $J = 8.0, 3.7$  Hz, 1H), 3.71 (s, 3H), 2.73 (dd,  $J = 8.0, 4.6$  Hz, 1H), 2.17 (s, 3H), 1.44 (s, 18H) ppm;  **$^{13}\text{C NMR}$**  (126 MHz,  $\text{CDCl}_3$ ):  $\delta$  166.46, 164.69, 144.48, 143.07, 137.01, 134.49, 133.40, 133.03, 129.25, 128.72, 128.55, 128.21, 127.69, 126.81, 126.73, 126.44, 126.39, 124.30, 123.58, 74.76, 64.63, 61.78, 59.16, 36.01, 31.97, 21.53 ppm; **HRMS** (ESI): ( $m/z$ ) calcd for  $\text{C}_{36}\text{H}_{43}\text{NO}_6\text{S}$   $[\text{M}+\text{Na}]^+$ : 640.2703, found: 640.2728; **IR**:  $\tilde{\nu} = 3278, 2961, 1716, 1598, 1447, 1410, 1363, 1296, 1259, 1225, 1155, 1115, 1092, 1007, 888, 857, 804, 751, 704, 665, 540, 478$   $\text{cm}^{-1}$ ; **HPLC**: *er* was determined by HPLC analysis (Chiralpak IA, *i*PrOH/Hexane = 20/80, 1.0 mL/min, 254 nm) Retention time:  $t_{\text{minor}} = 7.23$  min,  $t_{\text{major}} = 11.77$  min, *er* = 91:9.

**2r:**

**(2R,3S)-3-([1,1'-biphenyl]-4-yl)-3-hydroxy-2-((4-methylphenyl)sulfonamido)propyl 3,5-di-tert-butyl-4-methoxybenzoate**

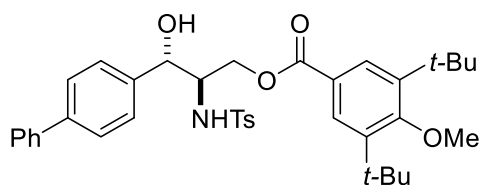

The title compound was synthesized according to the general procedure and isolated by column chromatography (Petroleum ether / EtOAc = 3:1) in 44% yield. Viscous colorless oil;  $[\alpha]_D^{21} = -9.2$  ( $c = 0.5$ ,  $\text{CHCl}_3$ );  **$^1\text{H NMR}$**  (500 MHz,  $\text{CDCl}_3$ ):  $\delta$  7.84 (s, 2H), 7.65 (d,  $J = 7.9$  Hz, 2H), 7.53 (dd,  $J = 12.5, 8.0$  Hz, 4H), 7.44 (t,  $J = 7.5$  Hz, 2H), 7.36 (d,  $J = 7.8$  Hz, 3H), 7.06 (d,  $J = 8.0$  Hz, 2H), 5.25 (d,  $J = 7.9$  Hz, 1H), 4.94 (t,  $J = 4.6$  Hz, 1H), 4.51 (dd,  $J = 11.9, 6.7$  Hz, 1H), 4.18 (dd,  $J = 11.9, 4.2$  Hz, 1H), 3.90 (tt,  $J = 7.8, 4.5$  Hz, 1H), 3.70 (s, 3H), 2.98 (d,  $J = 4.7$  Hz, 1H), 2.21 (s, 3H), 1.44 (s, 18H) ppm;  **$^{13}\text{C NMR}$**  (101 MHz,  $\text{CDCl}_3$ )  $\delta$  167.44, 164.46, 144.31, 143.49, 141.06, 140.57, 138.44, 137.26, 129.75, 128.97, 128.65, 127.62,

127.39, 127.15, 127.05, 126.59, 123.58, 73.91, 64.59, 62.73, 58.80, 36.03, 32.05, 29.85 ppm; **HRMS** (ESI): (*m/z*) calcd for C<sub>38</sub>H<sub>45</sub>NO<sub>6</sub>S [M+Na]<sup>+</sup>: 666.2860, found: 666.2892; **IR**:  $\tilde{\nu}$  = 3478, 3279, 2961, 2924, 2855, 1714, 1598, 1487, 1448, 1410, 1363, 1299, 1259, 1226, 1159, 1115, 1091, 1008, 886, 800, 752, 697, 664, 569, 550, 497 cm<sup>-1</sup>; **HPLC**: *er* was determined by HPLC analysis (Chiralpak IC, *i*PrOH/Hexane = 20/80, 1.0 mL/min, 254 nm) Retention time: *t*<sub>minor</sub> = 11.16 min, *t*<sub>major</sub> = 16.50 min, *er* = 99:1.

**3r:**

**(1R,2S)-1-([1,1'-biphenyl]-4-yl)-3-hydroxy-2-((4-methylphenyl)sulfonamido)propyl 3,5-di-tert-butyl-4-methoxybenzoate**

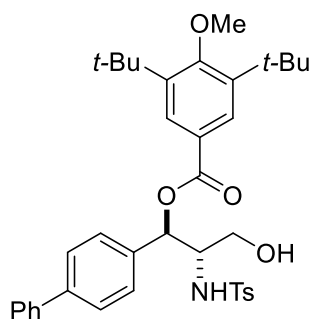

The title compound was synthesized according to the general procedure and isolated by column chromatography (Petroleum ether / EtOAc = 3:1) in 46% yield. Viscous colorless oil;  $[\alpha]_D^{21} = +21.8$  (*c* = 0.5, CHCl<sub>3</sub>); **<sup>1</sup>H NMR** (500 MHz, CDCl<sub>3</sub>):  $\delta$  7.97 (s, 2H), 7.54 (ddd, *J* = 10.2, 7.8, 1.6 Hz, 4H), 7.48 – 7.40 (m, 4H), 7.40 – 7.32 (m, 1H), 7.32 – 7.28 (m, 2H), 7.10 (d, *J* = 8.1 Hz, 2H), 5.93 (d, *J* = 7.0 Hz, 1H), 5.25 (d, *J* = 9.2 Hz, 1H), 3.90 – 3.79 (m, 2H), 3.75 (dd, *J* = 7.5, 3.6 Hz, 1H), 3.71 (s, 3H), 2.42 (q, *J* = 4.4, 3.9 Hz, 1H), 2.21 (s, 3H), 1.44 (s, 18H) ppm; **<sup>13</sup>C NMR** (126 MHz, CDCl<sub>3</sub>):  $\delta$  166.42, 164.72, 144.53, 143.46, 141.38, 140.44, 137.40, 135.89, 129.69, 128.99, 128.72, 127.71, 127.48, 127.29, 127.13, 127.05, 123.56, 74.70, 64.65, 61.51, 59.07, 36.04, 31.99, 21.45 ppm; **HRMS** (ESI): (*m/z*) calcd for C<sub>38</sub>H<sub>45</sub>NO<sub>6</sub>S [M+Na]<sup>+</sup>: 666.2860, found: 666.2893; **IR**:  $\tilde{\nu}$  = 3281, 2959, 2925, 1717, 1598, 1488, 1449, 1411, 1363, 1297, 1227, 1158, 1136, 1117, 1094, 1058, 1007, 911, 888, 835, 813, 765, 698, 665, 550, 519 cm<sup>-1</sup>; **HPLC**: *er* was determined by HPLC analysis (Chiralpak IA, *i*PrOH/Hexane = 20/80, 1.0 mL/min, 254 nm) Retention time: *t*<sub>minor</sub> = 5.96 min, *t*<sub>major</sub> = 8.64 min, *er* = 98:2.

**2s:**

**((1S,2R)-1-hydroxy-2-(methylsulfonamido)-2,3-dihydro-1H-inden-2-yl)methyl 3,5-di-tert-butyl-4-methoxybenzoate**

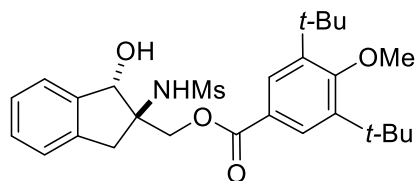

The title compound was synthesized according to the general procedure and isolated by column chromatography (Petroleum ether / EtOAc = 2:1) in

48% yield. Viscous colorless oil;  $[\alpha]_D^{20} = -37.4$  ( $c = 0.5$ ,

$\text{CHCl}_3$ );  **$^1\text{H NMR}$**  (500 MHz,  $\text{CDCl}_3$ ):  $\delta$  7.91 (s, 2H), 7.39 (dd,  $J = 6.2, 2.2$  Hz, 1H), 7.25 – 7.19 (m, 2H), 7.19 – 7.13 (m, 1H), 5.40 (s, 1H), 5.19 (s, 1H), 4.79 (dd,  $J = 12.4, 1.1$  Hz, 1H), 4.45 (d,  $J = 12.5$  Hz, 1H), 3.87 – 3.82 (m, 1H), 3.71 (s, 3H), 3.39 (d,  $J = 15.7$  Hz, 1H), 3.15 (d,  $J = 15.6$  Hz, 1H), 3.08 (s, 3H), 1.44 (s, 18H) ppm;  **$^{13}\text{C NMR}$**  (126 MHz,  $\text{CDCl}_3$ ):  $\delta$  167.09, 164.60, 144.48, 141.54, 137.11, 128.92, 128.53, 127.73, 124.73, 124.50, 123.58, 81.80, 70.39, 64.64, 63.88, 44.30, 39.78, 36.03, 32.01 ppm; **HRMS** (ESI): ( $m/z$ ) calcd for  $\text{C}_{27}\text{H}_{37}\text{NO}_6\text{S}$   $[\text{M}+\text{Na}]^+$ : 526.2234, found: 526.2258; **IR**:  $\tilde{\nu} = 3275, 2961, 1715, 1595, 1447, 1410, 1376, 1300, 1224, 1145, 1116, 1065, 1005, 887, 810, 753, 671, 523$   $\text{cm}^{-1}$ ; **HPLC**: *er* was determined by HPLC analysis (Chiralpak IA, *i*PrOH/Hexane = 20/80, 1.0 mL/min, 254 nm) Retention time:  $t_{\text{minor}} = 6.94$  min,  $t_{\text{major}} = 5.67$  min, *er* = 90:10.

**3s:**

**(1R,2S)-2-(hydroxymethyl)-2-(methylsulfonamido)-2,3-dihydro-1H-inden-1-yl 3,5-di-tert-butyl-4-methoxybenzoate**

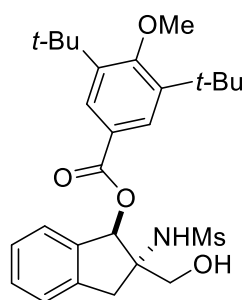

The title compound was synthesized according to the general procedure and isolated by column chromatography (Petroleum ether / EtOAc = 2:1) in 47% yield. Viscous colorless oil;  $[\alpha]_D^{20} =$

$+4.8$  ( $c = 1.0$ ,  $\text{CHCl}_3$ );  **$^1\text{H NMR}$**  (500 MHz,  $\text{CDCl}_3$ ):  $\delta$  7.98 (s, 2H), 7.41 – 7.32 (m, 2H), 7.32 – 7.26 (m, 2H), 6.45 (s, 1H), 6.12 (s, 1H),

3.95 (dd,  $J = 12.1, 5.6$  Hz, 1H), 3.85 (dd,  $J = 12.1, 7.4$  Hz, 1H), 3.72

(s, 3H), 3.51 – 3.40 (m, 2H), 3.10 (s, 3H), 2.55 (dd,  $J = 7.5, 5.9$  Hz, 1H), 1.44 (s, 18H)

ppm;  **$^{13}\text{C NMR}$**  (126 MHz,  $\text{CDCl}_3$ ):  $\delta$  167.99, 164.88, 144.66, 139.74, 137.97, 129.62,

128.76, 127.73, 125.13, 125.02, 123.40, 84.16, 70.80, 64.66, 64.58, 44.05, 39.61, 36.05,

31.99 ppm; **HRMS** (ESI): ( $m/z$ ) calcd for  $\text{C}_{27}\text{H}_{37}\text{NO}_6\text{S}$   $[\text{M}+\text{Na}]^+$ : 526.2234, found:

526.2259; **IR**:  $\tilde{\nu} = 3506, 3278, 2960, 1713, 1595, 1463, 1409, 1362, 1296, 1224, 1133,$

$1071, 1005, 888, 753, 671, 523$   $\text{cm}^{-1}$ ; **HPLC**: *er* was determined by HPLC analysis

(Chiralpak IC, *i*PrOH/Hexane = 20/80, 1.0 mL/min, 254 nm) Retention time:  $t_{\text{minor}} = 11.24$  min,  $t_{\text{major}} = 19.25$  min,  $er = 90:10$ .

**2t:**

**(3R,4S)-3-hydroxy-4-(methylsulfonamido)hexyl 3,5-di-tert-butyl-4-methoxybenzoate**

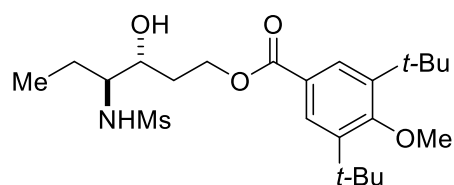

The title compound was synthesized according to the general procedure and isolated by column chromatography (Petroleum ether / EtOAc = 2:1)

in 45% yield. Viscous colorless oil;  $[\alpha]_{\text{D}}^{20} = -3.6$  ( $c = 1.0$ ,  $\text{CHCl}_3$ );

$^1\text{H NMR}$  (500 MHz,  $\text{CDCl}_3$ ):  $\delta$  7.92 (s, 2H), 4.70 (d,  $J = 8.8$  Hz, 1H), 4.63 (ddd,  $J = 11.2, 9.3, 4.7$  Hz, 1H), 4.39 (ddd,  $J = 10.9, 5.9, 4.6$  Hz, 1H), 3.89 – 3.83 (m, 1H), 3.70 (s, 3H), 3.45 – 3.36 (m, 1H), 3.07 (d,  $J = 5.2$  Hz, 1H), 3.03 (s, 3H), 1.98 – 1.88 (m, 1H), 1.80 (ddt,  $J = 14.9, 10.5, 4.6$  Hz, 1H), 1.60 (ttd,  $J = 13.8, 7.0, 6.5, 4.7$  Hz, 1H), 1.50 (ddd,  $J = 14.3, 9.6, 7.3$  Hz, 1H), 1.43 (s, 18H), 1.03 (t,  $J = 7.4$  Hz, 3H) ppm;  $^{13}\text{C NMR}$  (126 MHz,  $\text{CDCl}_3$ ):  $\delta$  167.66, 164.32, 144.33, 128.45, 124.13, 70.53, 64.59, 61.89, 60.57, 41.93, 36.00, 32.02, 23.40, 11.04 ppm; **HRMS** (ESI): ( $m/z$ ) calcd for  $\text{C}_{23}\text{H}_{39}\text{NO}_6\text{S}$  [ $\text{M}+\text{Na}$ ] $^+$ : 480.2390, found: 480.2413; **IR**:  $\tilde{\nu} = 3501, 3288, 2964, 1714, 1596, 1454, 1411, 1392, 1363, 1301, 1236, 1140, 1117, 1084, 1009, 978, 911, 888, 770, 756, 678, 520$   $\text{cm}^{-1}$ ; **HPLC**:  $er$  was determined by HPLC analysis (Chiralpak IC, *i*PrOH/Hexane = 20/80, 1.0 mL/min, 254 nm) Retention time:  $t_{\text{minor}} = 16.18$  min,  $t_{\text{major}} = 24.71$  min,  $er = 95:5$ .

**3t:**

**(3S,4R)-1-hydroxy-4-(methylsulfonamido)hexan-3-yl 3,5-di-tert-butyl-4-methoxybenzoate**

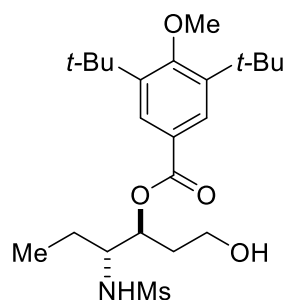

The title compound was synthesized according to the general procedure and isolated by column chromatography (Petroleum ether / EtOAc = 2:1) in 50% yield. Viscous colorless oil;  $[\alpha]_{\text{D}}^{20} = -$

4.6 ( $c = 1.0$ ,  $\text{CHCl}_3$ );  $^1\text{H NMR}$  (500 MHz,  $\text{CDCl}_3$ ):  $\delta$  7.95 (s, 2H), 5.37 – 5.30 (m, 1H), 4.92 (d,  $J = 9.3$  Hz, 1H), 3.81 – 3.74 (m, 1H), 3.72 (s, 3H), 3.71 – 3.60 (m, 2H), 3.02 (s, 3H), 2.54 (s, 1H),

1.99 (dddd,  $J = 14.6, 9.1, 5.3, 3.6$  Hz, 1H), 1.89 (ddt,  $J = 14.1, 8.8, 4.2$  Hz, 1H), 1.76 (dtd,

$J = 14.7, 7.3, 4.3$  Hz, 1H), 1.64 – 1.50 (m, 1H), 1.44 (s, 18H), 1.08 (t,  $J = 7.4$  Hz, 3H) ppm;  $^{13}\text{C NMR}$  (126 MHz,  $\text{CDCl}_3$ ):  $\delta$  167.46, 164.64, 144.56, 128.64, 123.66, 73.56, 64.63, 58.56, 58.39, 42.58, 36.04, 33.57, 31.99, 24.43, 10.73 ppm; **HRMS** (ESI): ( $m/z$ ) calcd for  $\text{C}_{23}\text{H}_{39}\text{NO}_6\text{S}$   $[\text{M}+\text{Na}]^+$ : 480.2390, found: 480.2400; **IR**:  $\tilde{\nu} = 3284, 2964, 1709, 1626, 1595, 1453, 1412, 1363, 1299, 1278, 1227, 1135, 1082, 1061, 1010, 974, 908, 890, 755, 684, 622, 521$   $\text{cm}^{-1}$ ; **HPLC**: *er* was determined by HPLC analysis (Chiralpak IC, *i*PrOH/Hexane = 20/80, 1.0 mL/min, 254 nm) Retention time:  $t_{\text{minor}} = 20.67$  min,  $t_{\text{major}} = 13.19$  min, *er* = 93:7.

**2u:**

**(3R,4S)-3-hydroxy-4-(methylsulfonamido)heptyl 3,5-di-tert-butyl-4-methoxybenzoate**

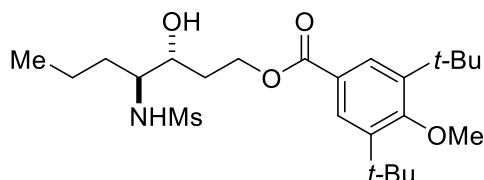

The title compound was synthesized according to the general procedure and isolated by column chromatography (Petroleum ether / EtOAc = 2:1) in 47% yield. Viscous colorless oil;

$[\alpha]_{\text{D}}^{24} = -5.1$  ( $c = 0.5, \text{CHCl}_3$ );  $^1\text{H NMR}$  (500 MHz,  $\text{CDCl}_3$ ):  $\delta$  7.93 (s, 2H), 4.70 – 4.64 (m, 1H), 4.64 – 4.59 (m, 1H), 4.39 (ddd,  $J = 10.9, 5.8, 4.5$  Hz, 1H), 3.85 (dt,  $J = 10.6, 2.7$  Hz, 1H), 3.70 (s, 3H), 3.52 – 3.47 (m, 1H), 3.02 (s, 3H), 2.71 (s, 1H), 1.92 (dddd,  $J = 15.0, 8.8, 5.8, 2.4$  Hz, 1H), 1.80 (ddt,  $J = 14.9, 10.6, 4.7$  Hz, 1H), 1.60 – 1.51 (m, 1H), 1.51 – 1.40 (m, 2H), 1.43 (s, 18H), 1.40 – 1.32 (m, 1H), 0.94 (t,  $J = 7.1$  Hz, 3H) ppm;  $^{13}\text{C NMR}$  (126 MHz,  $\text{CDCl}_3$ ):  $\delta$  167.66, 164.33, 144.33, 128.46, 124.13, 70.72, 64.59, 61.87, 58.83, 41.99, 36.01, 32.60, 32.02, 31.97, 19.62, 14.01 ppm; **HRMS** (ESI): ( $m/z$ ) calcd for  $\text{C}_{24}\text{H}_{41}\text{NO}_6\text{S}$   $[\text{M}+\text{H}]^+$ : 472.2728, found: 472.2748; **IR**:  $\tilde{\nu} = 3502, 3286, 2960, 2873, 1716, 1596, 1457, 1412, 1363, 1302, 1237, 1141, 1116, 1036, 1009, 980, 889, 771, 523, 456, 444, 423, 406$   $\text{cm}^{-1}$ ; **HPLC**: *er* was determined by HPLC analysis (Chiralpak IC, *i*PrOH/Hexane = 20/80, 1.0 mL/min, 254 nm) Retention time:  $t_{\text{minor}} = 15.78$  min,  $t_{\text{major}} = 24.16$  min, *er* = 94:6.

**3u:**

**(3S,4R)-1-hydroxy-4-(methylsulfonamido)heptan-3-yl 3,5-di-tert-butyl-4-**

### methoxybenzoate

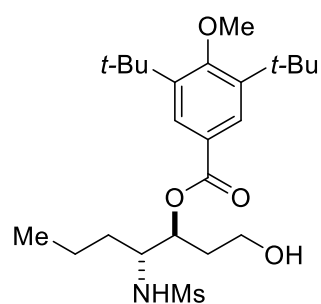

The title compound was synthesized according to the general procedure and isolated by column chromatography (Petroleum ether / EtOAc = 2:1) in 49% yield. Viscous colorless oil;  $[\alpha]_D^{25} = +6.1$  ( $c = 1.0$ ,  $\text{CHCl}_3$ ); **<sup>1</sup>H NMR** (500 MHz,  $\text{CDCl}_3$ ):  $\delta$  7.95 (s, 2H), 5.31 (dt,  $J = 9.4, 3.6$  Hz, 1H), 4.92 (s, 1H), 3.80 – 3.73 (m, 2H), 3.72 (s, 3H), 3.63 (ddd,  $J = 11.5, 9.3, 3.9$  Hz, 1H), 3.00 (s, 3H), 2.37 (m, 1H), 1.97 (dddd,  $J = 14.5, 9.1, 5.3, 3.8$  Hz, 1H), 1.88 (ddt,  $J = 14.1, 8.8, 4.2$  Hz, 1H), 1.69 – 1.55 (m, 2H), 1.55 – 1.37 (m, 2H), 1.44 (s, 18H), 0.96 (t,  $J = 7.1$  Hz, 3H) ppm; **<sup>13</sup>C NMR** (126 MHz,  $\text{CDCl}_3$ ):  $\delta$  167.47, 164.64, 144.55, 128.65, 123.68, 73.83, 64.63, 58.39, 56.86, 42.61, 36.04, 33.58, 33.49, 31.99, 19.30, 13.96 ppm; **HRMS** (ESI): ( $m/z$ ) calcd for  $\text{C}_{24}\text{H}_{41}\text{NO}_6\text{S}$   $[\text{M}+\text{Na}]^+$ : 494.2547, found: 494.2570; **IR**:  $\tilde{\nu} = 3287, 2960, 2873, 1713, 1596, 1457, 1411, 1363, 1299, 1228, 1139, 1116, 1055, 1009, 977, 889, 806, 768, 520, 464, 431, 418$   $\text{cm}^{-1}$ ; **HPLC**: *er* was determined by HPLC analysis (Chiralpak IC, *i*PrOH/Hexane = 20/80, 1.0 mL/min, 254 nm) Retention time:  $t_{\text{minor}} = 16.62$  min,  $t_{\text{major}} = 10.96$  min, *er* = 90.5:9.5.

### 2v:

#### (3R,4S)-3-hydroxy-5-methyl-4-(methylsulfonamido)hexyl 3,5-di-tert-butyl-4-methoxybenzoate

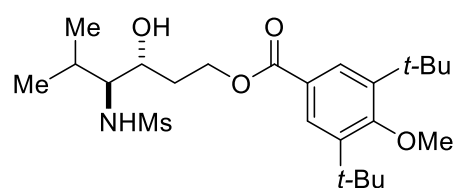

The title compound was synthesized according to the general procedure and isolated by column chromatography (Petroleum ether / EtOAc = 2:1) in 50% yield. Viscous colorless oil;  $[\alpha]_D^{27} = +1.8$  ( $c = 1.0$ ,  $\text{CHCl}_3$ ); **<sup>1</sup>H NMR** (500 MHz,  $\text{CDCl}_3$ ):  $\delta$  7.92 (s, 2H), 4.64 (td,  $J = 10.7, 4.1$  Hz, 1H), 4.58 (dd,  $J = 13.3, 9.8$  Hz, 1H), 4.41 (ddd,  $J = 11.3, 5.6, 4.2$  Hz, 1H), 3.94 (dt,  $J = 9.2, 3.6$  Hz, 1H), 3.70 (s, 3H), 3.32 (ddd,  $J = 9.3, 7.2, 3.9$  Hz, 1H), 3.07 (s, 3H), 3.01 (dd,  $J = 5.7, 3.7$  Hz, 1H), 1.96 (dddd,  $J = 14.3, 9.9, 5.6, 2.0$  Hz, 1H), 1.89 – 1.73 (m, 2H), 1.43 (s, 18H), 1.03 (d,  $J = 6.7$  Hz, 3H), 1.00 (d,  $J = 6.7$  Hz, 3H) ppm; **<sup>13</sup>C NMR** (126 MHz,  $\text{CDCl}_3$ ):  $\delta$  167.59, 164.28, 144.32, 128.41, 124.20, 68.87, 64.58, 64.53, 61.84, 42.18, 36.00, 32.02, 31.46, 29.68, 20.63, 19.32 ppm; **HRMS** (ESI): ( $m/z$ ) calcd for  $\text{C}_{24}\text{H}_{41}\text{NO}_6\text{S}$   $[\text{M}+\text{Na}]^+$ :

494.2547, found: 494.2572; **IR**:  $\tilde{\nu}$  = 3502, 3287, 2962, 1698, 1596, 1448, 1411, 1365, 1299, 1225, 1136, 1115, 1076, 1005, 911, 888, 862, 801, 753, 665, 518, 435  $\text{cm}^{-1}$ ; **HPLC**: *er* was determined by HPLC analysis (Chiralpak IC, *i*PrOH/Hexane = 20/80, 1.0 mL/min, 254 nm) Retention time:  $t_{\text{minor}}$  = 15.60 min,  $t_{\text{major}}$  = 28.14 min, *er* = 90:10.

**3v:**

**(3S,4R)-1-hydroxy-5-methyl-4-(methylsulfonamido)hexan-3-yl 3,5-di-tert-butyl-4-methoxybenzoate**

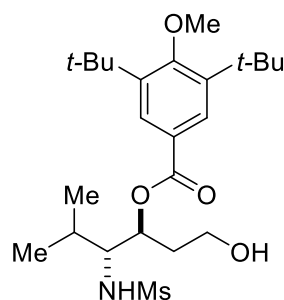

The title compound was synthesized according to the general procedure and isolated by column chromatography (Petroleum ether / EtOAc = 2:1) in 46% yield. Viscous colorless oil;  $[\alpha]_{\text{D}}^{25}$  = +3.3 ( $c$  = 1.0,  $\text{CHCl}_3$ );  **$^1\text{H NMR}$**  (500 MHz,  $\text{CDCl}_3$ ):  $\delta$  7.95 (s, 2H), 5.43 (ddd,  $J$  = 9.8, 4.9, 3.2 Hz, 1H), 4.94 (s, 1H), 3.82 – 3.74 (m, 1H), 3.72 (s, 3H), 3.66 – 3.56 (m, 2H), 3.02 (s, 3H), 2.38 (s, 1H), 2.04 (dddd,  $J$  = 15.1, 10.0, 5.4, 3.3 Hz, 1H), 1.97 (td,  $J$  = 6.9, 5.7 Hz, 1H), 1.88 (ddt,  $J$  = 14.0, 9.7, 3.9 Hz, 1H), 1.43 (s, 18H), 1.08 (d,  $J$  = 6.8 Hz, 3H), 1.02 (d,  $J$  = 6.8 Hz, 3H) ppm;  **$^{13}\text{C NMR}$**  (126 MHz,  $\text{CDCl}_3$ ):  $\delta$  167.47, 164.63, 144.56, 128.69, 123.62, 72.21, 64.61, 61.81, 58.35, 42.89, 36.05, 33.69, 31.99, 29.38, 20.75, 18.22 ppm; **HRMS** (ESI): ( $m/z$ ) calcd for  $\text{C}_{24}\text{H}_{41}\text{NO}_6\text{S}$   $[\text{M}+\text{Na}]^+$ : 494.2547, found: 494.2572; **IR**:  $\tilde{\nu}$  = 3290, 2962, 1712, 1595, 1466, 1411, 1394, 1363, 1298, 1227, 1135, 1116, 1044, 1009, 975, 888, 804, 756, 665, 519  $\text{cm}^{-1}$ ; **HPLC**: *er* was determined by HPLC analysis (Chiralpak IA, *i*PrOH/Hexane = 20/80, 1.0 mL/min, 254 nm) Retention time:  $t_{\text{minor}}$  = 4.78 min,  $t_{\text{major}}$  = 4.42 min, *er* = 93:7.

**2w:**

**(3R,4S)-3-hydroxy-4-(methylsulfonamido)-5-phenylpentyl 3,5-di-tert-butyl-4-methoxybenzoate**

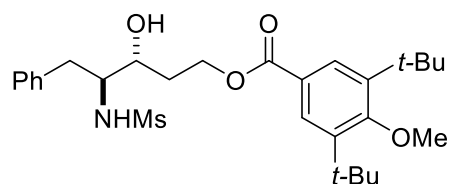

The title compound was synthesized according to the general procedure and isolated by column chromatography (Petroleum ether / EtOAc = 2:1) in 46% yield. Viscous colorless oil;  $[\alpha]_{\text{D}}^{25}$  = -17.0 ( $c$  =

0.5, CHCl<sub>3</sub>); **<sup>1</sup>H NMR** (500 MHz, CDCl<sub>3</sub>): δ 7.95 (s, 2H), 7.32 – 7.27 (m, 2H), 7.25 – 7.19 (m, 3H), 4.82 (d, *J* = 8.9 Hz, 1H), 4.70 (ddd, *J* = 11.3, 9.3, 4.7 Hz, 1H), 4.42 (ddd, *J* = 10.9, 5.9, 4.5 Hz, 1H), 3.89 (dq, *J* = 10.9, 3.0 Hz, 1H), 3.71 (s, 3H), 3.61 (ddt, *J* = 10.9, 8.9, 3.8 Hz, 1H), 3.32 (d, *J* = 5.1 Hz, 1H), 3.00 (dd, *J* = 13.9, 3.9 Hz, 1H), 2.66 (dd, *J* = 13.9, 10.9 Hz, 1H), 2.16 (s, 3H), 2.11 (dddd, *J* = 15.2, 8.8, 5.9, 2.4 Hz, 1H), 1.92 (ddt, *J* = 14.9, 10.5, 4.6 Hz, 1H), 1.44 (s, 18H) ppm; **<sup>13</sup>C NMR** (126 MHz, CDCl<sub>3</sub>): δ 167.81, 164.37, 144.32, 138.31, 129.83, 128.94, 128.55, 127.12, 124.09, 71.14, 64.60, 61.86, 61.12, 40.55, 36.01, 36.00, 33.03, 32.03 ppm; **HRMS** (ESI): (*m/z*) calcd for C<sub>28</sub>H<sub>41</sub>NO<sub>6</sub>S [M+Na]<sup>+</sup>: 542.2547, found: 542.2570; **IR**:  $\tilde{\nu}$  = 3495, 3288, 2961, 1715, 1596, 1455, 1410, 1363, 1302, 1237, 1149, 1116, 1075, 1031, 1007, 912, 888, 770, 751, 703, 679, 516 cm<sup>-1</sup>; **HPLC**: *er* was determined by HPLC analysis (Chiralpak IA, *i*PrOH/Hexane = 20/80, 1.0 mL/min, 254 nm) Retention time: *t*<sub>minor</sub> = 4.96 min, *t*<sub>major</sub> = 5.39 min, *er* = 95:5.

### 3w:

#### (2R,3S)-5-hydroxy-2-(methylsulfonamido)-1-phenylpentan-3-yl 3,5-di-tert-butyl-4-methoxybenzoate

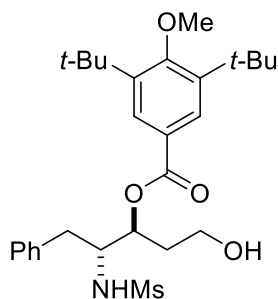

The title compound was synthesized according to the general procedure and isolated by column chromatography (Petroleum ether / EtOAc = 2:1) in 50% yield. Viscous colorless oil; [ $\alpha$ ]<sub>D</sub><sup>25</sup> = +21.5 (*c* = 1.0, CHCl<sub>3</sub>); **<sup>1</sup>H NMR** (500 MHz, CDCl<sub>3</sub>): δ 8.02 (s, 2H), 7.32 (t, *J* = 7.6 Hz, 2H), 7.29 – 7.18 (m, 3H), 5.42 – 5.26 (m, 2H), 3.97 (dq, *J* = 9.6, 4.8 Hz, 1H), 3.82 (dt, *J* = 10.4, 4.9 Hz, 1H), 3.73 (s, 3H), 3.72 – 3.63 (m, 1H), 3.12 (dd, *J* = 13.9, 4.0 Hz, 1H), 2.67 (dd, *J* = 13.9, 10.6 Hz, 1H), 2.23 – 2.17 (m, 1H), 2.19 (s, 3H), 1.97 (ddt, *J* = 13.6, 8.4, 4.0 Hz, 1H), 1.46 (s, 18H) ppm; **<sup>13</sup>C NMR** (126 MHz, CDCl<sub>3</sub>): δ 167.39, 164.62, 144.50, 137.88, 129.87, 128.96, 128.74, 127.25, 123.72, 74.12, 64.62, 59.42, 58.40, 41.31, 38.02, 36.05, 33.84, 32.01 ppm; **HRMS** (ESI): (*m/z*) calcd for C<sub>28</sub>H<sub>41</sub>NO<sub>6</sub>S [M+Na]<sup>+</sup>: 542.2547, found: 542.2572; **IR**:  $\tilde{\nu}$  = 3283, 2961, 1712, 1596, 1456, 1410, 1363, 1299, 1228, 1152, 1116, 1051, 1009, 911, 888, 804, 754, 703, 679, 521 cm<sup>-1</sup>; **HPLC**: *er* was determined by HPLC analysis (Chiralpak IA, *i*PrOH/Hexane = 08/92, 1.0 mL/min, 254 nm) Retention time: *t*<sub>minor</sub>



= 20.05 min,  $t_{\text{major}} = 18.96$  min,  $er = 90:10$ .

**2x:**

**(3R,4S)-6-((tert-butyldimethylsilyloxy)-3-hydroxy-4-(methylsulfonamido)hexyl 3,5-di-tert-butyl-4-methoxybenzoate**

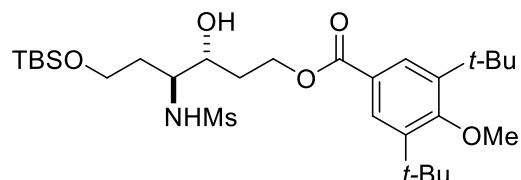

The title compound was synthesized according to the general procedure and isolated by column chromatography (Petroleum ether / EtOAc = 2:1) in 45% yield.

Viscous colorless oil;  $[\alpha]_{\text{D}}^{20} = -2.1$  ( $c = 1.0$ ,  $\text{CHCl}_3$ );  **$^1\text{H NMR}$**  (500 MHz,  $\text{CDCl}_3$ ):  $\delta$  7.93 (s, 2H), 5.27 (d,  $J = 7.9$  Hz, 1H), 4.59 (ddd,  $J = 11.2, 9.0, 5.1$  Hz, 1H), 4.42 (ddd,  $J = 11.0, 6.1, 4.7$  Hz, 1H), 3.87 – 3.79 (m, 3H), 3.70 (s, 3H), 3.68 – 3.60 (m, 2H), 3.00 (s, 3H), 2.00 (dddd,  $J = 14.9, 8.8, 6.1, 2.8$  Hz, 1H), 1.91 – 1.81 (m, 3H), 1.44 (s, 18H), 0.88 (s, 9H), 0.08 (s, 3H), 0.06 (s, 3H) ppm;  **$^{13}\text{C NMR}$**  (126 MHz,  $\text{CDCl}_3$ ):  $\delta$  167.51, 164.26, 144.27, 128.46, 124.24, 70.37, 64.59, 61.80, 59.48, 56.48, 41.12, 36.01, 33.33, 32.17, 32.03, 25.95, 18.25, -5.35, -5.37 ppm; **HRMS** (ESI): ( $m/z$ ) calcd for  $\text{C}_{29}\text{H}_{53}\text{NO}_7\text{SSi}$   $[\text{M}+\text{Na}]^+$ : 610.3204, found: 610.3232; **IR**:  $\tilde{\nu} = 3496, 3287, 2955, 2929, 2858, 1716, 1596, 1471, 1411, 1390, 1362, 1301, 1236, 1143, 1115, 1089, 1008, 979, 888, 836, 809, 774, 678, 520$   $\text{cm}^{-1}$ ; **HPLC**:  $er$  was determined by HPLC analysis (Chiralpak IC,  $i\text{PrOH/Hexane} = 20/80$ , 1.0 mL/min, 254 nm) Retention time:  $t_{\text{minor}} = 8.40$  min,  $t_{\text{major}} = 9.44$  min,  $er = 95:5$ .

**3x:**

**(3S,4R)-6-((tert-butyldimethylsilyloxy)-1-hydroxy-4-(methylsulfonamido)hexan-3-yl 3,5-di-tert-butyl-4-methoxybenzoate**

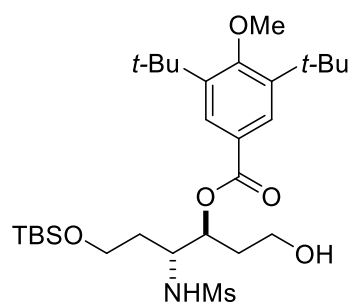

The title compound was synthesized according to the general procedure and isolated by column chromatography (Petroleum ether / EtOAc = 2:1) in 50% yield. Viscous colorless oil;  $[\alpha]_{\text{D}}^{19} = +7.8$  ( $c = 1.0$ ,  $\text{CHCl}_3$ );  **$^1\text{H NMR}$**  (500 MHz,  $\text{CDCl}_3$ ):  $\delta$  7.95 (s, 2H), 5.49 (d,  $J = 8.3$  Hz, 1H), 5.37 (dt,  $J = 8.8, 4.1$  Hz, 1H), 3.94 (tq,  $J = 8.4, 3.7$  Hz, 1H), 3.90

– 3.73 (m, 3H), 3.72 (s, 3H), 3.64 (ddt,  $J = 11.9, 9.0, 4.4$  Hz, 1H), 3.02 (s, 3H), 2.53 (dd,  $J = 7.4, 5.0$  Hz, 1H), 2.08 (dddd,  $J = 14.6, 9.2, 5.3, 3.8$  Hz, 1H), 1.98 (dddd,  $J = 14.4, 8.9,$

5.2, 3.6 Hz, 1H), 1.89 (ddt,  $J = 14.0, 8.9, 4.3$  Hz, 1H), 1.79 – 1.66 (m, 1H), 1.44 (s, 18H), 0.90 (s, 9H), 0.08 (s, 3H), 0.08 (s, 3H) ppm;  $^{13}\text{C NMR}$  (126 MHz,  $\text{CDCl}_3$ ):  $\delta$  167.42, 164.63, 144.53, 128.64, 123.67, 73.51, 64.63, 59.92, 58.46, 54.91, 41.99, 36.03, 34.20, 32.86, 32.00, 26.00, 18.24, -5.27, -5.34 ppm; **HRMS** (ESI): ( $m/z$ ) calcd for  $\text{C}_{29}\text{H}_{53}\text{NO}_7\text{SSi}$   $[\text{M}+\text{Na}]^+$ : 610.3204, found: 610.3233; **IR**:  $\tilde{\nu} = 3282, 2955, 2929, 1713, 1595, 1471, 1411, 1393, 1362, 1298, 1226, 1139, 1115, 1095, 1052, 1007, 976, 887, 836, 808, 757, 665, 519$   $\text{cm}^{-1}$ ; **HPLC**: *er* was determined by HPLC analysis (Chiralpak IC, *i*PrOH/Hexane = 20/80, 1.0 mL/min, 254 nm) Retention time:  $t_{\text{minor}} = 11.36$  min,  $t_{\text{major}} = 8.09$  min, *er* = 91:9.

**2y:**

**(3R,4S)-6-(benzyloxy)-3-hydroxy-4-(methylsulfonamido)hexyl 3,5-di-tert-butyl-4-methoxybenzoate**

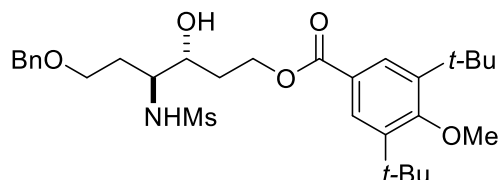

The title compound was synthesized according to the general procedure and isolated by column chromatography (Petroleum ether / EtOAc = 2:1) in 43% yield. Viscous colorless

oil;  $[\alpha]_{\text{D}}^{20} = -3.9$  ( $c = 1.0$ ,  $\text{CHCl}_3$ );  $^1\text{H NMR}$  (500 MHz,  $\text{CDCl}_3$ ):  $\delta$  7.93 (s, 2H), 7.37 – 7.27 (m, 5H), 5.15 (d,  $J = 8.1$  Hz, 1H), 4.57 (ddd,  $J = 11.2, 8.9, 5.1$  Hz, 1H), 4.50 (s, 2H), 4.39 (ddd,  $J = 11.1, 6.1, 4.8$  Hz, 1H), 3.83 (dp,  $J = 10.1, 3.1$  Hz, 1H), 3.70 (s, 3H), 3.69 – 3.61 (m, 3H), 3.41 (d,  $J = 6.4$  Hz, 1H), 2.93 (s, 3H), 2.03 – 1.79 (m, 4H), 1.44 (s, 18H) ppm;  $^{13}\text{C NMR}$  (126 MHz,  $\text{CDCl}_3$ ):  $\delta$  167.54, 164.27, 144.29, 137.48, 128.70, 128.45, 128.14, 128.02, 124.21, 73.55, 70.59, 66.51, 64.58, 61.90, 56.44, 41.21, 36.00, 32.97, 32.03, 29.75 ppm; **HRMS** (ESI): ( $m/z$ ) calcd for  $\text{C}_{30}\text{H}_{45}\text{NO}_7\text{S}$   $[\text{M}+\text{Na}]^+$ : 586.2809, found: 586.2838; **IR**:  $\tilde{\nu} = 3495, 3288, 2959, 2869, 1713, 1596, 1454, 1411, 1392, 1363, 1301, 1235, 1140, 1115, 1028, 1007, 978, 911, 888, 753, 699, 677, 520$   $\text{cm}^{-1}$ ; **HPLC**: *er* was determined by HPLC analysis (Chiralpak IC, *i*PrOH/Hexane = 10/90, 1.0 mL/min, 210 nm) Retention time:  $t_{\text{minor}} = 46.56$  min,  $t_{\text{major}} = 42.60$  min, *er* = 95:5.

**3y:**

**(3S,4R)-6-(benzyloxy)-1-hydroxy-4-(methylsulfonamido)hexan-3-yl 3,5-di-tert-butyl-4-methoxybenzoate**

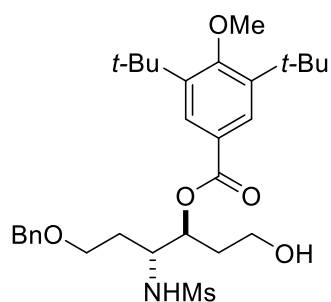

The title compound was synthesized according to the general procedure and isolated by column chromatography (Petroleum ether / EtOAc = 2:1) in 48% yield. Viscous colorless oil;  $[\alpha]_{\text{D}}^{20} = +8.9$  ( $c = 1.0$ ,  $\text{CHCl}_3$ );  $^1\text{H NMR}$  (500 MHz,  $\text{CDCl}_3$ ):  $\delta$  7.95 (s, 2H), 7.38 – 7.31 (m, 4H), 7.29 (tt,  $J = 7.2, 2.2$  Hz, 1H), 5.40 – 5.32 (m, 2H), 4.52 (s, 2H), 3.96 (tt,  $J = 8.5, 3.9$  Hz, 1H), 3.79 – 3.68 (m, 2H), 3.71 (s, 3H), 3.64 (dt,  $J = 9.8, 4.9$  Hz, 2H), 2.97 (s, 3H), 2.52 (dd,  $J = 7.1, 4.9$  Hz, 1H), 2.13 – 2.00 (m, 2H), 1.88 (ddt,  $J = 14.1, 8.9, 4.2$  Hz, 1H), 1.79 (dddd,  $J = 14.5, 9.1, 5.1, 3.9$  Hz, 1H), 1.44 (s, 18H) ppm;  $^{13}\text{C NMR}$  (126 MHz,  $\text{CDCl}_3$ ):  $\delta$  167.44, 164.67, 144.55, 137.81, 128.64, 128.05, 128.00, 123.60, 73.56, 73.51, 66.88, 64.64, 58.43, 55.05, 42.10, 36.03, 34.02, 31.99, 30.59 ppm; **HRMS** (ESI): ( $m/z$ ) calcd for  $\text{C}_{30}\text{H}_{45}\text{NO}_7\text{S}$   $[\text{M}+\text{Na}]^+$ : 586.2809, found: 586.2836; **IR**:  $\tilde{\nu} = 3281, 2959, 1711, 1595, 1454, 1411, 1363, 1299, 1227, 1139, 1115, 1052, 1007, 911, 888, 753, 698, 678, 520$   $\text{cm}^{-1}$ ; **HPLC**: *er* was determined by HPLC analysis (Chiralpak IC, *i*PrOH/Hexane = 20/80, 1.0 mL/min, 210 nm) Retention time:  $t_{\text{minor}} = 26.07$  min,  $t_{\text{major}} = 17.00$  min, *er* = 92.5:7.5.

## 2z:

### (3*R*,4*S*)-3-hydroxy-4-(methylsulfonamido)hexane-1,6-diyl bis(3,5-di-tert-butyl-4-methoxybenzoate)

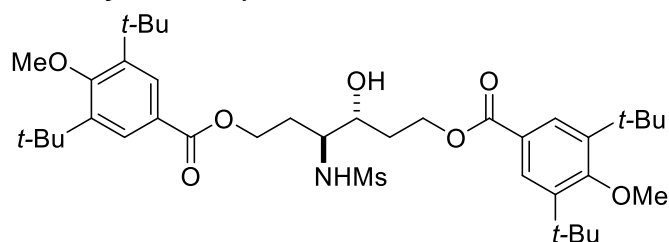

The title compound was synthesized according to the general procedure (variations: **C7** as the catalyst) and isolated by column chromatography (Petroleum ether / EtOAc = 2:1) in 41% yield. Viscous colorless oil;  $[\alpha]_{\text{D}}^{19} = -14.1$  ( $c = 1.0$ ,  $\text{CHCl}_3$ );  $^1\text{H NMR}$  (500 MHz,  $\text{CDCl}_3$ ):  $\delta$  7.93 (s, 2H), 7.92 (s, 2H), 5.08 (d,  $J = 9.3$  Hz, 1H), 4.67 (ddd,  $J = 11.3, 9.1, 4.7$  Hz, 1H), 4.57 (ddd,  $J = 11.0, 6.4, 4.3$  Hz, 1H), 4.45 – 4.33 (m, 2H), 3.95 (dq,  $J = 7.8, 2.5$  Hz, 1H), 3.70 (s, 6H), 3.67 (td,  $J = 6.7, 3.5$  Hz, 1H), 3.38 (d,  $J = 4.9$  Hz, 1H), 3.03 (s, 3H), 2.09 (dddd,  $J = 15.0, 9.5, 6.4, 3.4$  Hz, 1H), 2.02 – 1.80 (m, 3H), 1.43 (s, 36H) ppm;  $^{13}\text{C NMR}$  (126 MHz,  $\text{CDCl}_3$ ):

$\delta$  167.82, 166.96, 164.41, 164.29, 144.37, 144.35, 128.53, 128.38, 124.16, 123.95, 70.95, 64.58, 61.78, 61.46, 55.57, 41.98, 36.01, 32.91, 32.01, 28.83 ppm; **HRMS** (ESI): ( $m/z$ ) calcd for  $C_{39}H_{61}NO_9S$   $[M+Na]^+$ : 742.3959, found: 742.3994; **IR**:  $\tilde{\nu}$  = 2961, 1716, 1596, 1448, 1410, 1393, 1363, 1300, 1227, 1132, 1007, 938, 888, 788, 769, 678, 601, 508  $cm^{-1}$ ; **HPLC**: *er* was determined by HPLC analysis (Chiralpak IA, *i*PrOH/Hexane = 20/80, 1.0 mL/min, 254 nm) Retention time:  $t_{minor}$  = 4.10 min,  $t_{major}$  = 4.69 min, *er* = 97:3.

### 3z:

#### (3R,4S)-6-hydroxy-3-(methylsulfonamido)hexane-1,4-diyl bis(3,5-di-tert-butyl-4-methoxybenzoate)

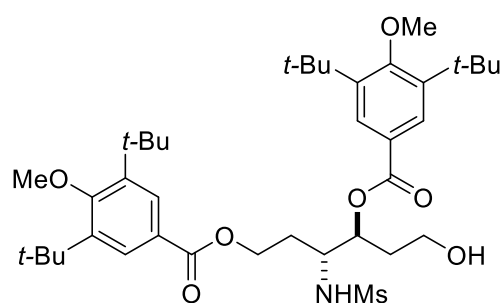

The title compound was synthesized according to the general procedure (variations: **C7** as the catalyst) and isolated by column chromatography (Petroleum ether / EtOAc = 2:1) in 50% yield. Viscous colorless oil;  $[\alpha]_D^{20}$  = +5.2 ( $c$  = 1.0,  $CHCl_3$ );  **$^1H$  NMR** (500 MHz,  $CDCl_3$ ):  $\delta$  7.95 (s, 2H), 7.95 (s, 2H), 5.43 – 5.37 (m, 1H), 5.36 (d,  $J$  = 9.5 Hz, 1H), 4.60 (ddd,  $J$  = 11.0, 6.4, 4.3 Hz, 1H), 4.43 (ddd,  $J$  = 11.2, 9.0, 5.4 Hz, 1H), 4.00 (tt,  $J$  = 10.0, 3.4 Hz, 1H), 3.80 (dt,  $J$  = 10.7, 5.3 Hz, 1H), 3.72 (s, 3H), 3.71 (s, 3H), 3.67 (dt,  $J$  = 12.1, 4.0 Hz, 1H), 3.03 (s, 3H), 2.54 – 2.48 (m, 1H), 2.24 (dddd,  $J$  = 14.8, 9.6, 6.4, 3.4 Hz, 1H), 2.07 – 1.94 (m, 2H), 1.93 – 1.85 (m, 1H), 1.43 (s, 18H), 1.43 (s, 18H) ppm;  **$^{13}C$  NMR** (126 MHz,  $CDCl_3$ ):  $\delta$  167.35, 166.89, 164.72, 164.25, 144.57, 144.31, 128.67, 128.45, 124.19, 123.50, 74.34, 64.64, 64.57, 61.09, 58.35, 54.16, 42.40, 36.02, 36.00, 33.89, 32.01, 31.98, 30.30 ppm; **HRMS** (ESI): ( $m/z$ ) calcd for  $C_{39}H_{61}NO_9S$   $[M+Na]^+$ : 742.3959, found: 742.3993; **IR**:  $\tilde{\nu}$  = 3282, 2961, 1715, 1596, 1450, 1411, 1394, 1363, 1299, 1226, 1137, 1116, 1054, 1009, 974, 888, 757, 679, 519  $cm^{-1}$ ; **HPLC**: *er* was determined by HPLC analysis (Chiralpak IC, *i*PrOH/Hexane = 15/85, 1.0 mL/min, 254 nm) Retention time:  $t_{minor}$  = 19.71 min,  $t_{major}$  = 21.61 min, *er* = 90:10.

### 2aa:

#### (3R,4S)-6-azido-3-hydroxy-4-(methylsulfonamido)hexyl 3,5-di-tert-butyl-4-

### methoxybenzoate

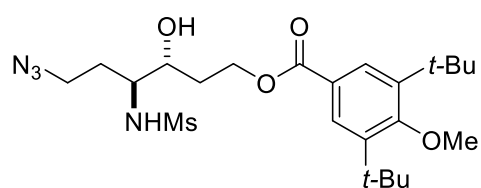

The title compound was synthesized according to the general procedure and isolated by column chromatography (Petroleum ether / EtOAc = 1:1) in 45% yield. Viscous colorless oil;  $[\alpha]_{\text{D}}^{20} = -17.0$

( $c = 0.5$ ,  $\text{CHCl}_3$ );  **$^1\text{H NMR}$**  (500 MHz,  $\text{CDCl}_3$ ):  $\delta$  7.92 (s, 2H), 5.09 (d,  $J = 9.3$  Hz, 1H), 4.70 – 4.60 (m, 1H), 4.33 (dt,  $J = 10.8, 5.1$  Hz, 1H), 3.88 – 3.82 (m, 1H), 3.71 (s, 3H), 3.60 – 3.34 (m, 4H), 2.97 (s, 3H), 1.96 – 1.86 (m, 1H), 1.83 – 1.71 (m, 2H), 1.67 (tt,  $J = 9.4, 5.0$  Hz, 1H), 1.43 (s, 18H) ppm;  **$^{13}\text{C NMR}$**  (126 MHz,  $\text{CDCl}_3$ ):  $\delta$  167.92, 164.49, 144.42, 128.52, 123.88, 70.72, 64.61, 61.72, 55.74, 48.17, 41.79, 36.02, 32.79, 32.01, 28.82 ppm; **HRMS** (ESI): ( $m/z$ ) calcd for  $\text{C}_{23}\text{H}_{38}\text{N}_4\text{O}_6\text{S}$   $[\text{M}+\text{Na}]^+$ : 521.2404, found: 521.2428; **IR**:  $\tilde{\nu} = 3492, 3285, 2957, 2926, 2870, 2100, 1714, 1596, 1457, 1412, 1363, 1301, 1278, 1237, 1142, 1116, 1082, 1062, 1006, 910, 889, 771, 677, 521$   $\text{cm}^{-1}$ ; **HPLC**: *er* was determined by HPLC analysis (Chiralpak IC, *i*PrOH/Hexane = 20/80, 1.0 mL/min, 210 nm) Retention time:  $t_{\text{minor}} = 11.69$  min,  $t_{\text{major}} = 14.17$  min, *er* = 93.5:6.5.

### 3aa:

#### (3S,4R)-6-azido-1-hydroxy-4-(methylsulfonamido)hexan-3-yl 3,5-di-tert-butyl-4-methoxybenzoate

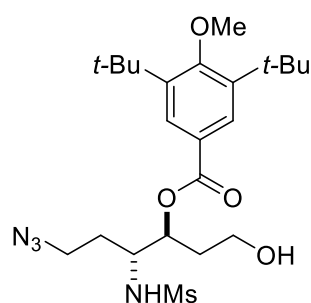

The title compound was synthesized according to the general procedure and isolated by column chromatography (Petroleum ether / EtOAc = 1:1) in 47% yield. Viscous colorless oil;  $[\alpha]_{\text{D}}^{20} = +7.0$  ( $c = 0.5$ ,  $\text{CHCl}_3$ );  **$^1\text{H NMR}$**  (500 MHz,  $\text{CDCl}_3$ ):  $\delta$  7.93 (s, 2H), 5.35 (dq,  $J = 11.2, 7.3, 5.6$  Hz, 2H), 3.82 (ddt,  $J = 25.2, 10.2, 5.5$  Hz, 2H), 3.74 – 3.64 (m, 1H),

3.72 (s, 3H), 3.61 – 3.45 (m, 2H), 3.02 (s, 3H), 2.51 (d,  $J = 16.8$  Hz, 1H), 2.06 – 1.98 (m, 1H), 1.91 (ddt,  $J = 14.2, 9.1, 4.5$  Hz, 2H), 1.66 (dt,  $J = 9.4, 4.9$  Hz, 1H), 1.43 (s, 18H) ppm;  **$^{13}\text{C NMR}$**  (126 MHz,  $\text{CDCl}_3$ ):  $\delta$  167.39, 164.86, 144.70, 128.65, 123.33, 74.07, 64.67, 58.34, 54.50, 48.02, 42.27, 36.04, 34.06, 31.98, 30.36 ppm; **HRMS** (ESI): ( $m/z$ ) calcd for  $\text{C}_{23}\text{H}_{38}\text{N}_4\text{O}_6\text{S}$   $[\text{M}+\text{Na}]^+$ : 521.2404, found: 521.2430; **IR**:  $\tilde{\nu} = 3283, 2958, 2926, 2100, 1712, 1595, 1456, 1412, 1363, 1298, 1228, 1138, 1116, 1054, 1007, 889, 768, 683, 520$   $\text{cm}^{-1}$ ;

**HPLC:** *er* was determined by HPLC analysis (Chiralpak IC, *i*PrOH/Hexane = 20/80, 1.0 mL/min, 254 nm) Retention time:  $t_{\text{minor}} = 19.96$  min,  $t_{\text{major}} = 12.97$  min, *er* = 90.5:9.5.

## Absolute Configuration Determination and X-Ray Analysis Data

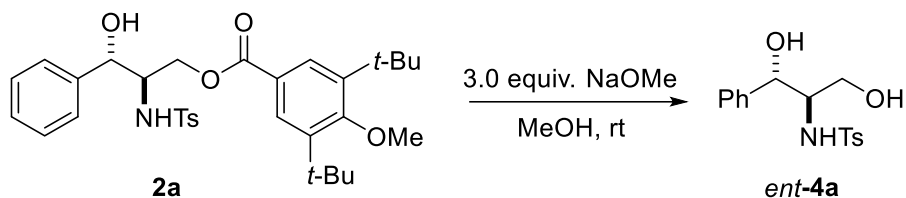

To a solution of **2a** (0.5 mmol, 1.0 equiv.) in MeOH (1 mL) was added NaOMe (1.5 mmol, 3.0 equiv.) and the mixture was stirred at rt. After the reaction was complete, the solvent was removed under reduced pressure and the residue was purified by column chromatography directly to afford *ent-4a* (Petroleum ether / EtOAc = 1:1).

### X-Ray: CCDC 2244430

Bond precision: C-C = 0.0043 Å      Wavelength=1.54178  
Cell:      a=7.5487(1)      b=11.1741(2)      c=18.1225(3)  
            alpha=90      beta=90      gamma=90  
Temperature: 150 K

|                        | Calculated     | Reported       |
|------------------------|----------------|----------------|
| Volume                 | 1528.63(4)     | 1528.63(4)     |
| Space group            | P 21 21 21     | P 21 21 21     |
| Hall group             | P 2ac 2ab      | P 2ac 2ab      |
| Moiety formula         | C16 H19 N O4 S | C16 H19 N O4 S |
| Sum formula            | C16 H19 N O4 S | C16 H19 N O4 S |
| Mr                     | 321.38         | 321.38         |
| Dx, g cm <sup>-3</sup> | 1.396          | 1.396          |
| Z                      | 4              | 4              |
| Mu (mm <sup>-1</sup> ) | 2.044          | 2.044          |
| F000                   | 680.0          | 680.0          |
| F000'                  | 683.32         |                |

|           |             |             |
|-----------|-------------|-------------|
| h,k,lmax  | 9,13,22     | 9,13,22     |
| Nref      | 3128[ 1812] | 3070        |
| Tmin,Tmax | 0.822,0.903 | 0.018,0.116 |
| Tmin'     | 0.782       |             |

Correction method = #    Reported T Limits: Tmin = 0.018    Tmax = 0.116

AbsCorr = MULTI-SCAN

Data completeness = 1.69/0.98    Theta(max) = 74.450

R(reflections) = 0.0429( 2991)    wR2(reflections) = 0.1110( 3070)

S = 1.089    Npar = 206

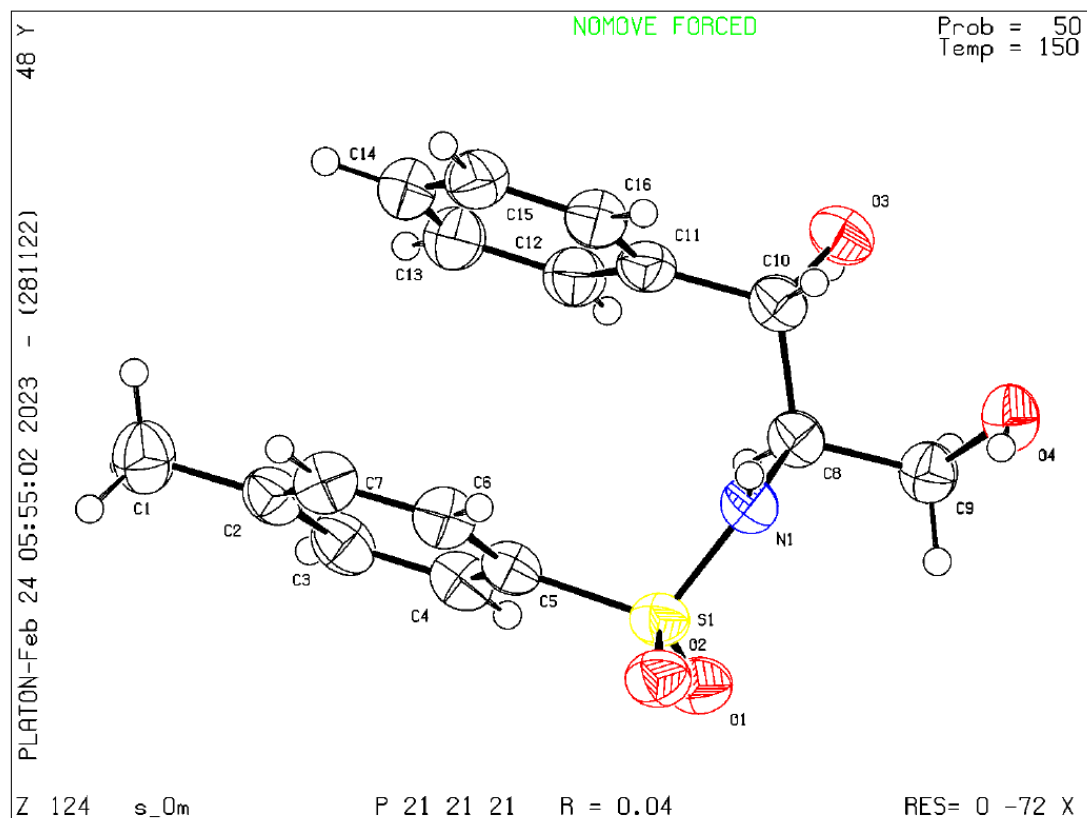



## Procedures and Characterization Data for the Derivatizations

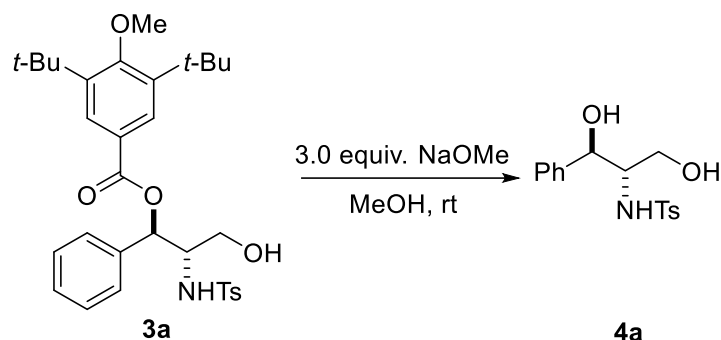

To a solution of **3a** (0.5 mmol, 1.0 equiv.) in MeOH (1 mL) was added NaOMe (1.5 mmol, 3.0 equiv.) and the mixture was stirred at rt. After the reaction was complete, the solvent was removed under reduced pressure and the residue was purified by column chromatography directly to afford **4a** (Petroleum ether / EtOAc = 1:1).

### 4a:

#### N-((1R,2S)-1,3-dihydroxy-1-phenylpropan-2-yl)-4-methylbenzenesulfonamide

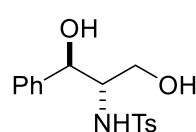

The title compound was isolated by column chromatography (Petroleum ether / EtOAc = 1:1) in 82% yield. Colorless crystal; **HPLC**: *er* was determined by HPLC analysis (Chiralpak IC, *i*PrOH/Hexane =

30/70, 1.0 mL/min, 210 nm) Retention time:  $t_{\text{minor}} = 24.57$  min,  $t_{\text{major}} = 17.00$  min, *er* = 98:2.

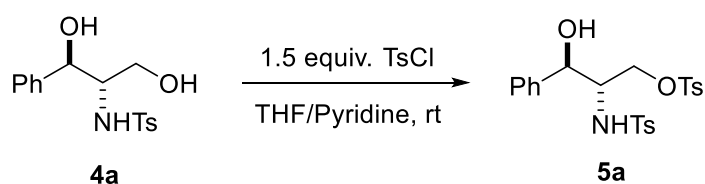

A solution of *p*-toluenesulfonyl chloride (0.525 mmol, 1.0 equiv.) in THF (1 mL) was added to a suspension of **4a** (0.35 mmol, 1.0 equiv.) in pyridine (2 mL) under stirring at 0 °C. The mixture was stirred for 24 h at rt, poured into 5 mL of 2 M hydrochloric acid, and extracted with ethyl acetate. The combined organics were washed with brine, dried over sodium sulfate, and concentrated under reduced pressure. The crude was purified by silica gel column chromatography (Petroleum ether / EtOAc = 2:1) to give **5a**.

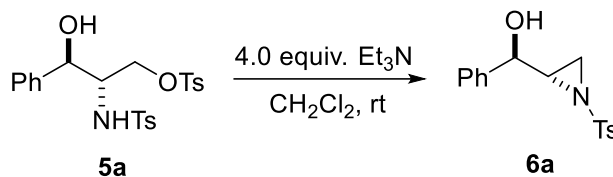

To a solution of **5a** (0.32 mmol, 1.0 equiv.) in  $\text{CH}_2\text{Cl}_2$  (2 mL) was added  $\text{Et}_3\text{N}$  (1.28 mmol, 4.0 equiv.) and was stirred at rt. After the reaction was complete, the mixture was purified by column chromatography directly to afford **6a** (Petroleum ether / EtOAc = 2:1).

**6a:**

**(R)-phenyl((S)-1-tosylaziridin-2-yl)methanol**

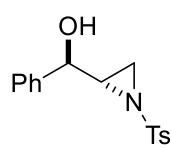

The title compound was isolated by column chromatography (Petroleum ether / EtOAc = 2:1) in 86% yield (2 steps). Viscous colorless oil; **HPLC**: *er* was determined by HPLC analysis (Chiralpak IC, *i*PrOH/Hexane = 30/70, 1.0 mL/min, 210 nm) Retention time:  $t_{\text{minor}} = 21.21$  min,  $t_{\text{major}} = 12.85$  min, *er* = 97.5:2.5.

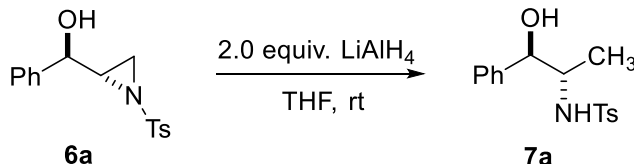

A solution of compound **6a** (0.15 mmol, 1.0 equiv.) in anhydrous THF (1 mL) was added over a period of 5 min to a suspension of  $\text{LiAlH}_4$  (0.30 mmol, 2.0 equiv.) in anhydrous THF (1 mL) on cooling to  $-40$  °C. The mixture was stirred for 2 h at  $-40$  °C, allowed to warm up to room temperature, and stirred for 12 h. Water was added to decompose excess  $\text{LiAlH}_4$ , the aqueous layer was extracted with ethyl acetate. The combined organics were washed with brine, dried over sodium sulfate, and concentrated under reduced pressure. The crude was purified by silica gel column chromatography (Petroleum ether / EtOAc = 2:1) to give **7a**.

**7a:**

**N-((1R,2S)-1-hydroxy-1-phenylpropan-2-yl)-4-methylbenzenesulfonamide**

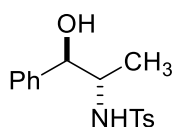

The title compound was isolated by column chromatography (Petroleum ether / EtOAc = 2:1) in 95% yield. Viscous colorless oil; **HPLC**: *er* was determined by HPLC analysis (Chiralpak IA, *i*PrOH/Hexane = 20/80, 1.0

mL/min, 210 nm) Retention time:  $t_{\text{minor}} = 14.43$  min,  $t_{\text{major}} = 13.05$  min, *er* = 99:1.

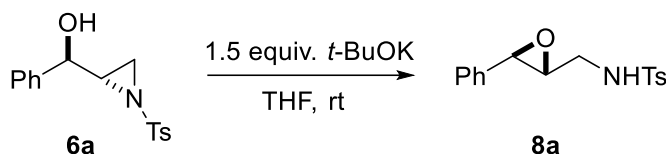

A mixture of compound **6a** (0.15 mmol, 1.0 equiv.) and *t*-BuOK (0.225 mmol, 1.5 equiv.) in anhydrous THF (1 mL) was stirred at rt. After the reaction was complete, the crude was purified by column chromatography directly to afford **8a** (Petroleum ether / EtOAc = 2:1).

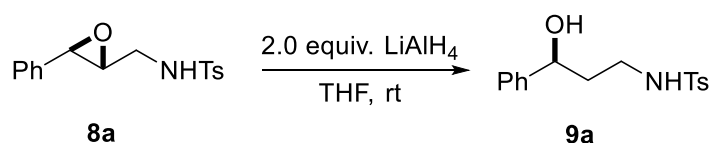

A solution of compound **8a** (0.12 mmol, 1.0 equiv.) in anhydrous THF (1 mL) was added over a period of 5 min to a suspension of LiAlH<sub>4</sub> (0.24 mmol, 2.0 equiv.) in anhydrous THF (1 mL) on cooling to -40 °C. The mixture was stirred for 2 h at -40 °C, allowed to warm up to room temperature, and stirred for 12 h. Water was added to decompose excess LiAlH<sub>4</sub>, the aqueous layer was extracted with ethyl acetate. The combined organics were washed with brine, dried over sodium sulfate, and concentrated under reduced pressure. The crude was purified by silica gel column chromatography (Petroleum ether / EtOAc = 2:1) to give **9a**.

**9a:**

**(S)-N-(3-hydroxy-3-phenylpropyl)-4-methylbenzenesulfonamide**

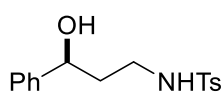

The title compound was isolated by column chromatography (Petroleum ether / EtOAc = 2:1) in 92% yield. Viscous colorless oil;

**HPLC**: *er* was determined by HPLC analysis (Chiralpak IC, *i*PrOH/Hexane = 30/70, 1.0 mL/min, 210 nm) Retention time:  $t_{\text{minor}} = 23.95$  min,  $t_{\text{major}} = 20.82$  min, *er* = 97:3.

Compounds **4a**, **5a**, **6a**, **7a**, **8a**, and **9a** are known and consistent with reported literature<sup>4</sup>.

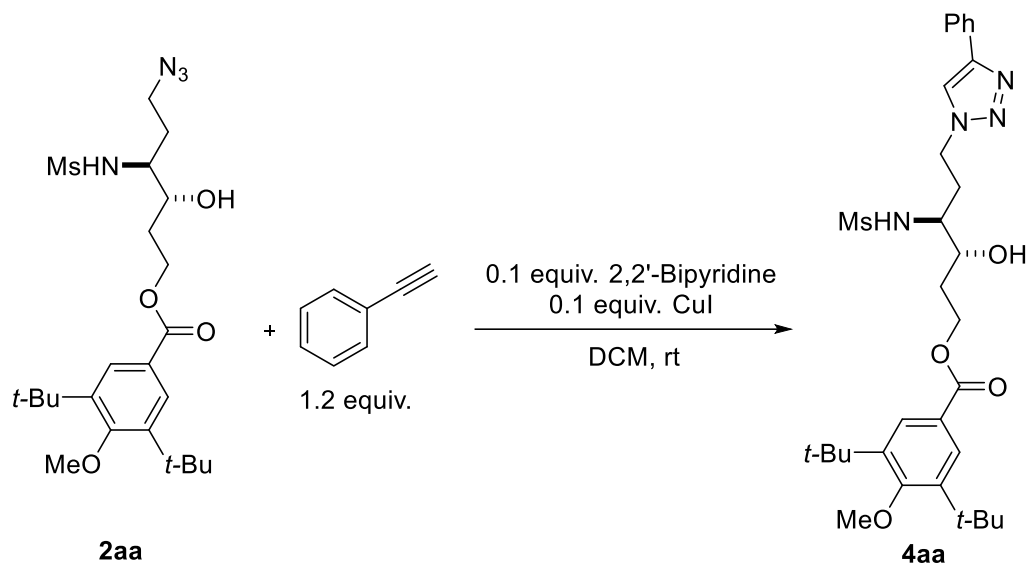

To a solution of **2aa** (0.05 mmol, 1.0 equiv.) in DCM (0.5 mL) was added 2,2'-bipyridine (0.005 mmol, 0.1 equiv.), CuI (0.005 mmol, 0.1 equiv.) and Phenylacetylene (0.06 mmol, 1.2 equiv.) at rt. After stirring for 6h, the mixture was concentrated under reduced pressure to give a residue, which was purified by flash column chromatography ( $\text{CH}_2\text{Cl}_2 / \text{CH}_3\text{OH} = 10:1$ ) to give the product **4aa**.

**4aa:**

**(3R,4S)-3-hydroxy-4-(methylsulfonylamido)-6-(4-phenyl-1H-1,2,3-triazol-1-yl)hexyl 3,5-di-tert-butyl-4-methoxybenzoate**

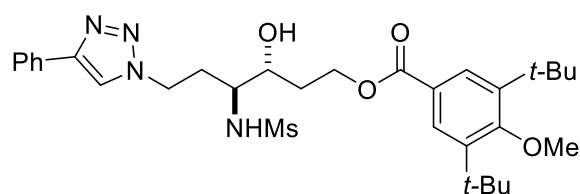

The title compound was isolated by column chromatography ( $\text{CH}_2\text{Cl}_2 / \text{CH}_3\text{OH} = 10:1$ ) in 90% yield. Viscous colorless oil;  $[\alpha]_{\text{D}}^{19} = -6.4$  ( $c = 0.4$ ,  $\text{CHCl}_3$ );

$^1\text{H NMR}$  (500 MHz,  $\text{CDCl}_3$ ):  $\delta$  7.95 (s, 1H), 7.90 (s, 2H), 7.83 – 7.77 (m, 2H), 7.40 (dd,  $J = 8.3, 7.0$  Hz, 2H), 7.34 – 7.28 (m, 1H), 5.25 (d,  $J = 9.5$  Hz, 1H), 4.67 (ddd,  $J = 11.6, 9.3, 4.5$  Hz, 1H), 4.64 – 4.54 (m, 2H), 4.32 (dt,  $J = 11.5, 5.1$  Hz, 1H), 3.89 – 3.83 (m, 2H), 3.70 (s, 3H), 3.52 – 3.44 (m, 1H), 3.03 (s, 3H), 2.32 (dtd,  $J = 15.0, 7.9, 6.9, 2.7$  Hz, 1H), 2.09 (ddt,  $J = 14.5, 11.0, 5.5$  Hz, 1H), 1.92 – 1.85 (m, 1H), 1.81 (tt,  $J = 9.6, 4.6$  Hz, 1H), 1.42 (s, 18H) ppm;  $^{13}\text{C NMR}$  (126 MHz,  $\text{CDCl}_3$ ):  $\delta$  168.00, 164.54, 147.73,

144.46, 130.54, 129.01, 128.51, 128.35, 125.86, 123.77, 121.23, 70.37, 64.62, 61.62, 55.82, 47.18, 42.11, 36.02, 32.84, 32.01, 30.77 ppm; **HRMS** (ESI): ( $m/z$ ) calcd for  $C_{31}H_{44}N_4O_6S$  [ $M+H$ ] $^+$ : 601.3055, found: 601.3082; **IR**:  $\tilde{\nu}$  = 3289, 2959, 2926, 2855, 1713, 1465, 1412, 1363, 1302, 1236, 1144, 1116, 1081, 1007, 980, 766, 695, 519  $cm^{-1}$ ; **HPLC**: *er* was determined by HPLC analysis (Chiralpak IA, *i*PrOH/Hexane = 20/80, 1.0 mL/min, 254 nm) Retention time:  $t_{minor}$  = 10.04 min,  $t_{major}$  = 10.96 min, *er* = 92.5:7.5.

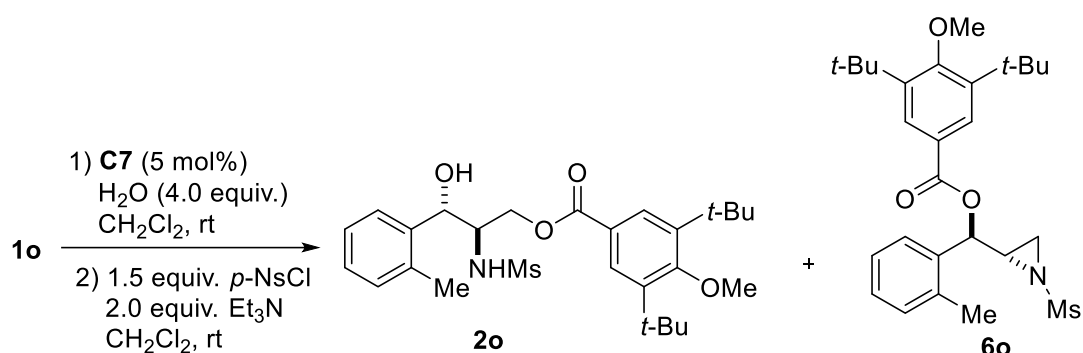

**1o** was subjected to the standard catalytic condition. When the starting material was fully converted, to the reaction was added *p*-NsCl (0.15 mmol, 1.5 equiv.), Et<sub>3</sub>N (0.20 mmol, 2.0 equiv.) successively. The reaction was stirred at rt for 6 h. The solvent was removed under reduced pressure and the crude products were purified and separated (**2o** and **6o**) by column chromatography.

**6o:**

**(R)-((S)-1-(methylsulfonyl)aziridin-2-yl)(*o*-tolyl)methyl 3,5-di-*tert*-butyl-4-methoxybenzoate**

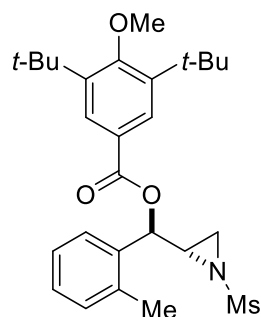

The title compound was isolated by column chromatography (Petroleum ether / EtOAc = 10:1) in 90% yield. Viscous colorless oil;  $[\alpha]_D^{20}$  = +1.8 ( $c$  = 1.0, CHCl<sub>3</sub>); **<sup>1</sup>H NMR** (500 MHz, CDCl<sub>3</sub>):  $\delta$  7.99 (s, 2H), 7.55 – 7.49 (m, 1H), 7.26 – 7.16 (m, 3H), 6.08 (d,  $J$  = 6.6 Hz, 1H), 3.71 (s, 3H), 3.17 (td,  $J$  = 6.7, 4.4 Hz, 1H), 2.79 (d,  $J$  = 6.8 Hz, 1H), 2.65 (s, 3H), 2.51 (s, 3H), 2.43 (d,  $J$  = 4.4 Hz, 1H), 1.44 (s, 18H) ppm; **<sup>13</sup>C NMR** (126 MHz, CDCl<sub>3</sub>):  $\delta$  165.79, 164.56, 144.49, 136.08, 135.66, 130.88, 128.90, 128.58, 127.07, 126.62, 123.81, 71.33, 64.65, 42.65, 39.17,

36.04, 32.01, 31.08, 19.67 ppm; **HRMS** (ESI): ( $m/z$ ) calcd for  $C_{27}H_{37}NO_5S$   $[M+Na]^+$ : 510.2284, found: 510.2304; **IR**:  $\bar{\nu}$  = 2961, 1718, 1596, 1465, 1410, 1362, 1325, 1226, 1157, 1129, 1065, 1004, 953, 899, 785, 766, 728, 676, 637, 545, 511, 459  $cm^{-1}$ ; **HPLC**: *er* was determined by HPLC analysis (Chiralpak IC, *i*PrOH/Hexane = 20/80, 1.0 mL/min, 254 nm) Retention time:  $t_{minor}$  = 11.12 min,  $t_{major}$  = 11.84 min, *er* = 97.5:2.5.

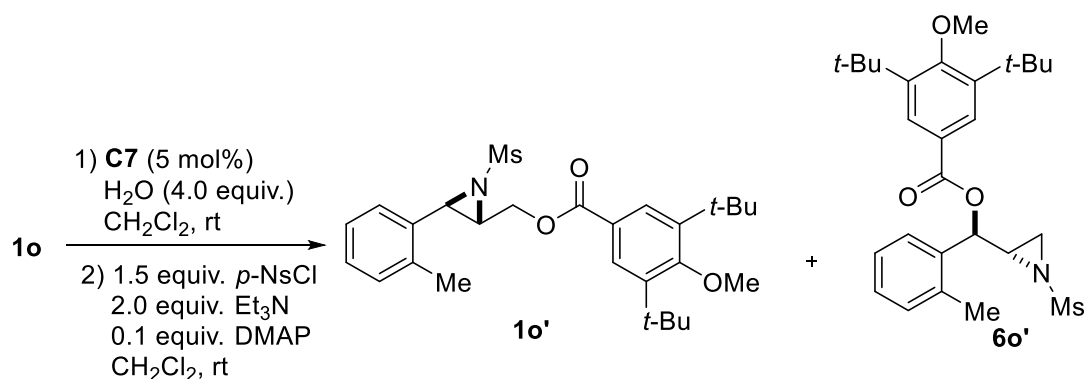

**1o** was subjected to the standard catalytic condition. When the starting material was fully converted, to the reaction was added *p*-NsCl (0.15 mmol, 1.5 equiv.),  $Et_3N$  (0.20 mmol, 2.0 equiv.), DMAP (0.01 mmol, 0.1 equiv.) successively. The reaction was stirred at rt for 20 h. The solvent was removed under reduced pressure and the crude products were purified and separated (**1o'** and **6o'**) by column chromatography.

**1o'**:

**((2S,3R)-1-(methylsulfonyl)-3-(*o*-tolyl)aziridin-2-yl)methyl 3,5-di-tert-butyl-4-methoxybenzoate**

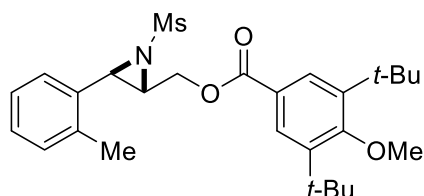

The title compound was isolated by column chromatography (Petroleum ether / EtOAc = 2:1) in 60% yield. Viscous colorless oil;  $[\alpha]_D^{20}$  = -35.2 ( $c$  = 0.4,  $CHCl_3$ ); **HPLC**: *er* was determined by HPLC

analysis (Chiralpak IC, *i*PrOH/Hexane = 20/80, 1.0 mL/min, 254 nm) Retention time:  $t_{minor}$  = 11.85 min,  $t_{major}$  = 13.45 min, *er* = 96:4.

**6o'**:

**(R)-((S)-1-(methylsulfonyl)aziridin-2-yl)(o-tolyl)methyl 3,5-di-tert-butyl-4-methoxybenzoate**

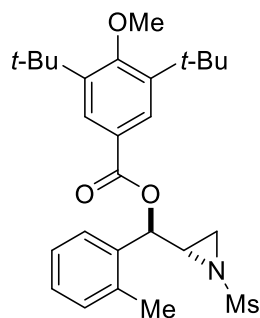

The title compound was isolated by column chromatography (Petroleum ether / EtOAc = 10:1) in 90% yield. Viscous colorless oil;  $[\alpha]_D^{20} = +1.8$  ( $c = 1.0$ ,  $\text{CHCl}_3$ ); **HPLC**: *er* was determined by HPLC analysis (Chiralpak IC, *i*PrOH/Hexane = 20/80, 1.0 mL/min, 254 nm) Retention time:  $t_{\text{minor}} = 11.11$  min,  $t_{\text{major}} = 11.83$  min, *er* = 97.5:2.5.

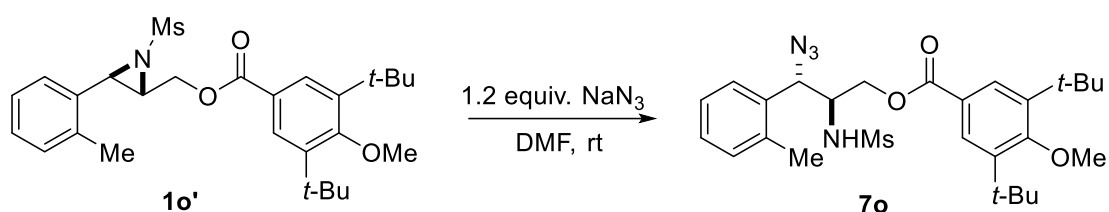

To a solution of **1o'** (0.05 mmol, 1.0 equiv.) in DMF (0.5 mL) was added  $\text{NaN}_3$  (0.06 mmol, 1.2 equiv.) at rt. After stirring for 12h, the aqueous layer was extracted with ethyl acetate. The combined organics were washed with brine, dried over sodium sulfate, and concentrated under reduced pressure. The crude was purified by silica gel column chromatography (Petroleum ether / EtOAc = 5:1) to give the product **5o**.

**7o:**

**(2S,3S)-3-azido-2-(methylsulfonylamino)-3-(o-tolyl)propyl 3,5-di-tert-butyl-4-methoxybenzoate**

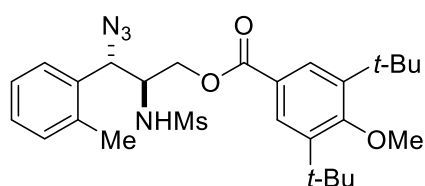

The title compound was isolated by column chromatography (Petroleum ether / EtOAc = 5:1) in 97% yield. Viscous colorless oil;  $[\alpha]_D^{21} = +27.3$  ( $c = 0.4$ ,  $\text{CHCl}_3$ );  **$^1\text{H NMR}$**  (500 MHz,  $\text{CDCl}_3$ ):  $\delta$  7.86 (s, 2H), 7.39 (d,  $J = 7.5$  Hz, 1H), 7.27 – 7.15 (m, 3H), 5.10 (d,  $J = 6.3$  Hz, 1H), 4.94 (d,  $J = 9.1$  Hz, 1H), 4.44 (dd,  $J = 11.8, 6.9$  Hz, 1H), 4.29 (dd,  $J = 11.9, 3.3$  Hz, 1H), 3.95 (dtd,  $J = 9.7, 6.6, 3.2$  Hz, 1H), 3.64 (s, 3H), 2.48 (s, 3H), 2.39 (s, 3H), 1.36 (s, 18H) ppm;  **$^{13}\text{C NMR}$**  (126 MHz,  $\text{CDCl}_3$ ):  $\delta$  166.92, 164.59, 144.57, 136.34, 134.38, 131.47, 129.00, 128.53, 127.21, 127.06, 123.58, 64.69, 64.63, 63.48, 56.64, 41.85, 36.05, 32.02, 19.61 ppm;

**HRMS** (ESI): ( $m/z$ ) calcd for  $C_{27}H_{38}N_4O_5S$   $[M+Na]^+$ : 553.2455, found: 553.2476; **IR**:  $\tilde{\nu}$  = 3271, 2962, 2106, 1718, 1595, 1446, 1411, 1387, 1324, 1299, 1227, 1155, 1117, 1007, 888, 767, 729, 681, 523  $cm^{-1}$ ; **HPLC**: *er* was determined by HPLC analysis (Chiralpak IA, *i*PrOH/Hexane = 20/80, 1.0 mL/min, 254 nm) Retention time:  $t_{minor}$  = 4.17 min,  $t_{major}$  = 5.10 min, *er* = 97.5:2.5.



## Mechanism Studies

### $^{18}\text{O}$ labeling experiment<sup>5</sup>

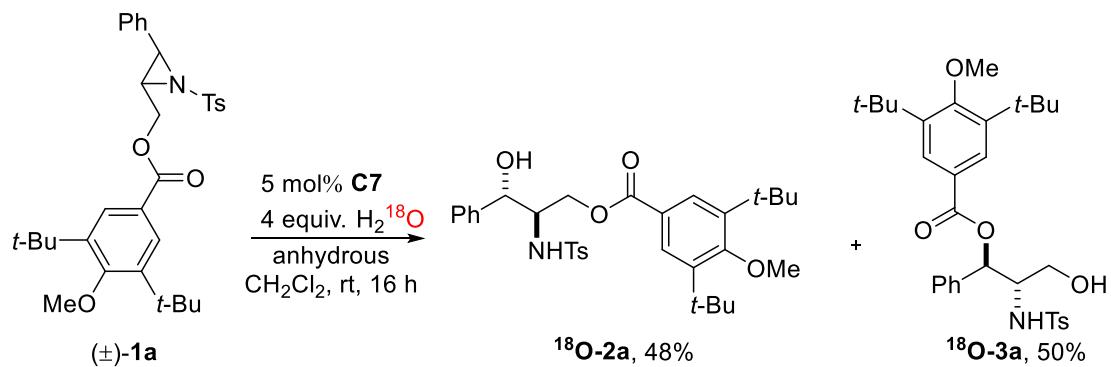

$^{18}\text{O}$ -2a: MS (ESI): (m/z) calcd for  $\text{C}_{32}\text{H}_{41}\text{NO}_5\text{S}^{18}\text{O}$   $[\text{M}+\text{H}]^+$ : 570.2770, found: 570.2786;  
 $^{18}\text{O}$ % incorporation: 85%

$^{18}\text{O}$ -3a: MS (ESI): (m/z) calcd for  $\text{C}_{32}\text{H}_{41}\text{NO}_5\text{S}^{18}\text{O}$   $[\text{M}+\text{H}]^+$ : 570.2770, found: 570.2774;  
 $^{18}\text{O}$ % incorporation: 83%

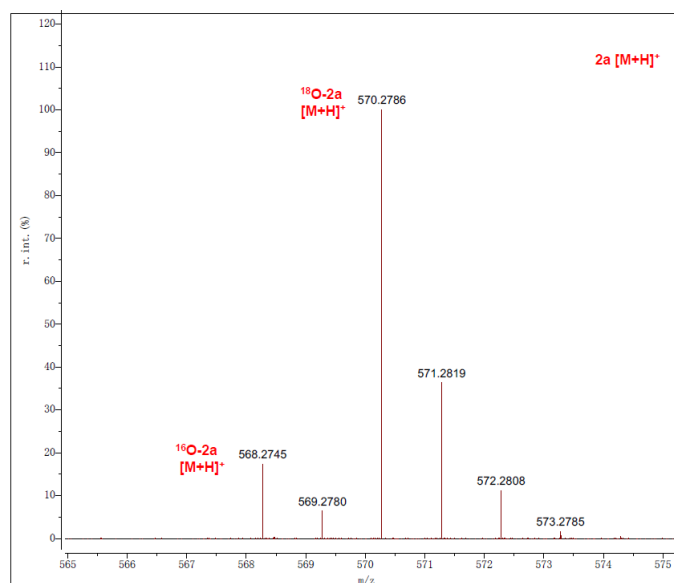

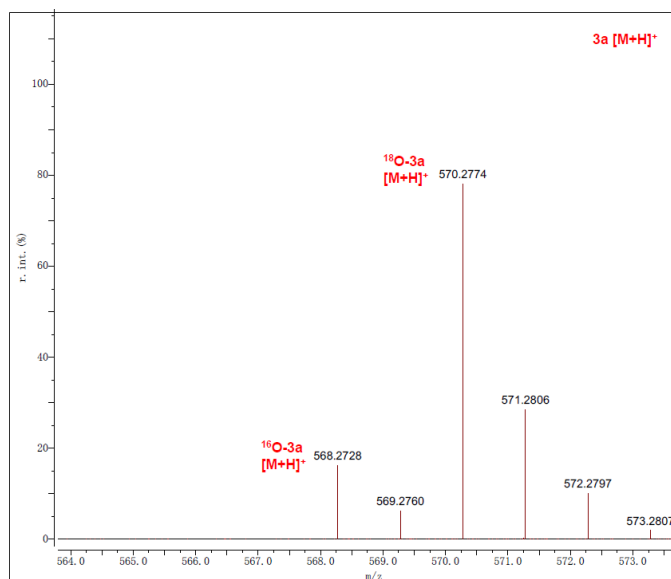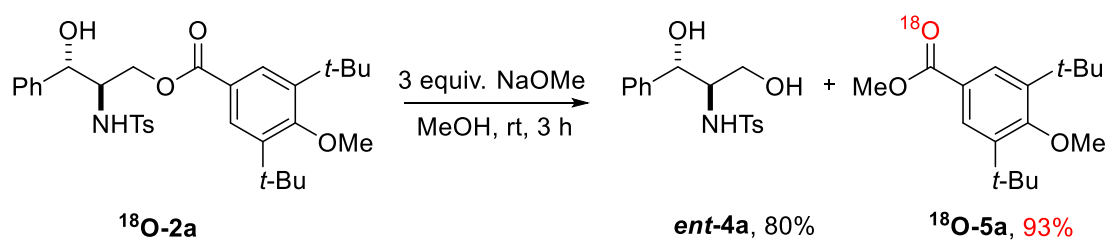

**ent-4a:** MS (ESI): (m/z) calcd for C<sub>16</sub>H<sub>19</sub>NO<sub>4</sub>S [M+Na]<sup>+</sup>: 344.0927, found: 344.0934;  
<sup>18</sup>O% incorporation: <1%

**<sup>18</sup>O-5a:** MS (ESI): (m/z) calcd for C<sub>17</sub>H<sub>26</sub>O<sub>2</sub><sup>18</sup>O [M+H]<sup>+</sup>: 281.1997, found: 281.1988;  
<sup>18</sup>O% incorporation: 81%

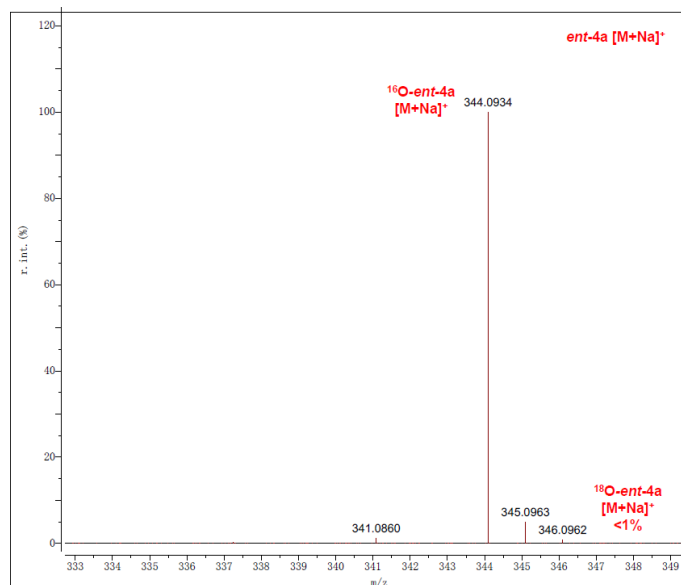

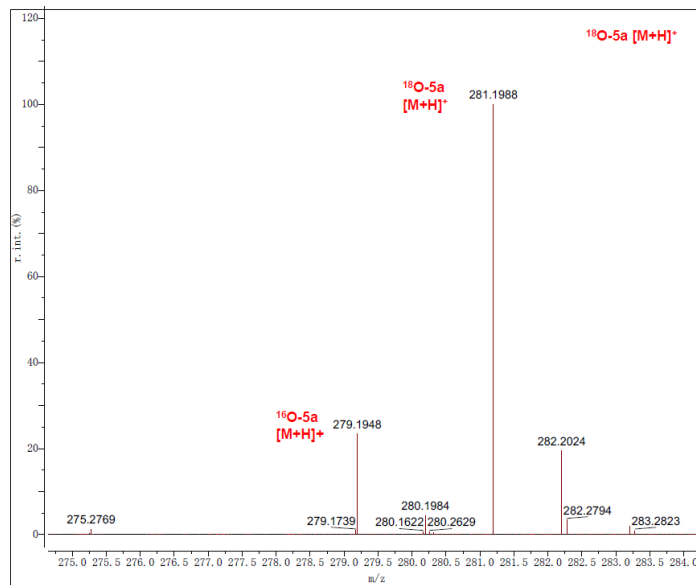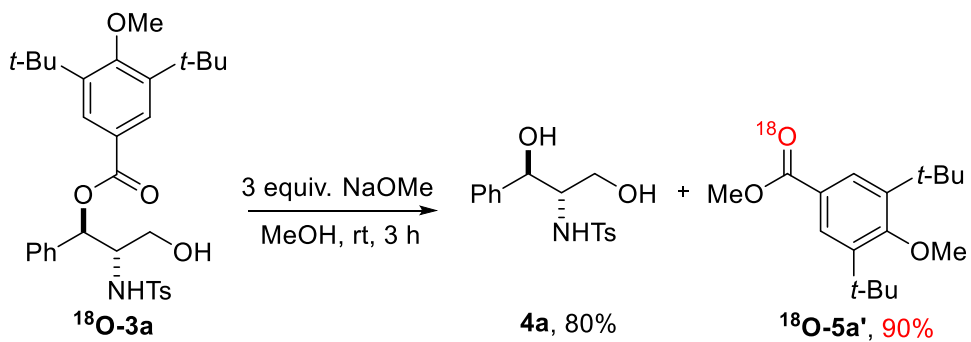

**4a**: MS (ESI): (m/z) calcd for  $\text{C}_{16}\text{H}_{19}\text{NO}_4\text{S} [\text{M}+\text{Na}]^+$ : 344.0927, found: 344.0927;  
 $^{18}\text{O}$ % incorporation: <1%

**$^{18}\text{O-5a}'$** : MS (ESI): (m/z) calcd for  $\text{C}_{17}\text{H}_{26}\text{O}_2\text{ }^{18}\text{O} [\text{M}+\text{H}]^+$ : 281.1997, found: 281.1993;  
 $^{18}\text{O}$ % incorporation: 80%

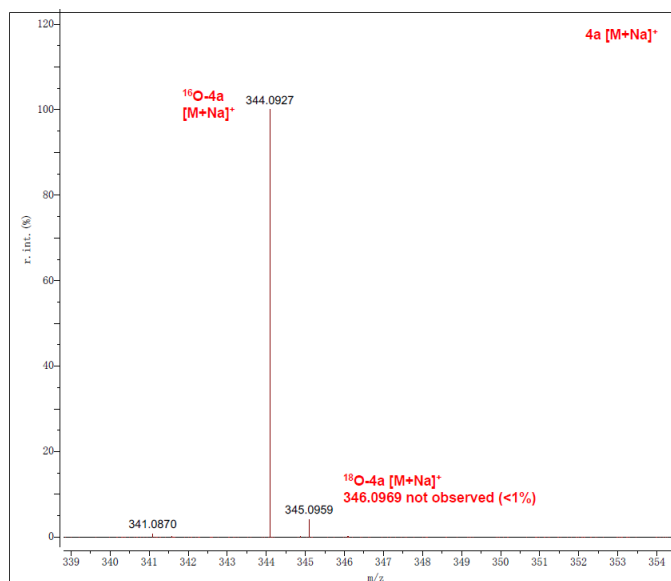

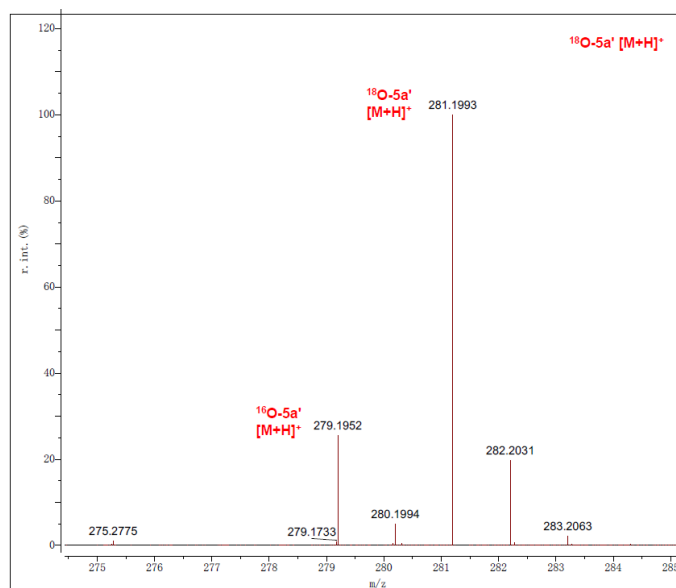

## Additional control experiments

Reaction involving a 7 vs. 8-membered ring intermediate

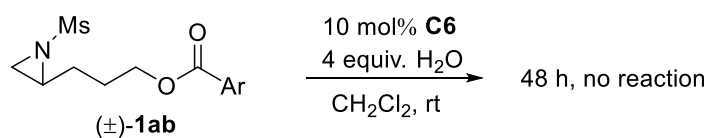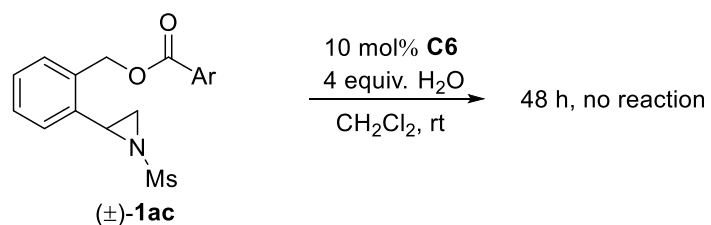

Ar = 3,5-(*t*-Bu)<sub>2</sub>-4-MeO-C<sub>6</sub>H<sub>2</sub>

Reaction involving a 5 vs. 6-membered ring intermediate

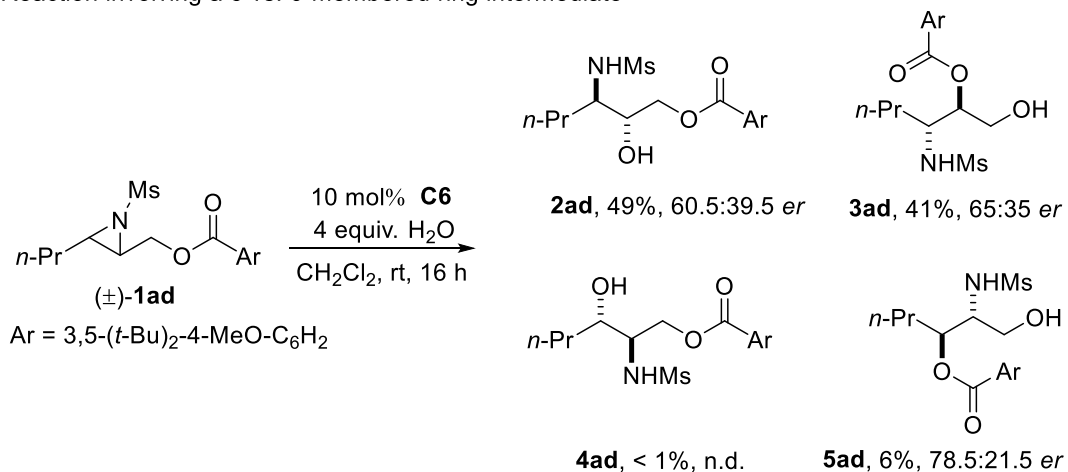

Parallel kinetic resolution of *cis-1a*

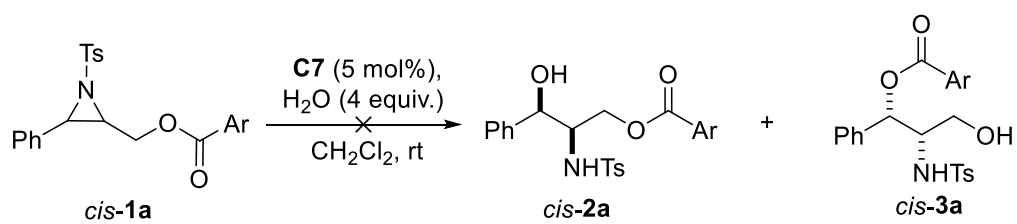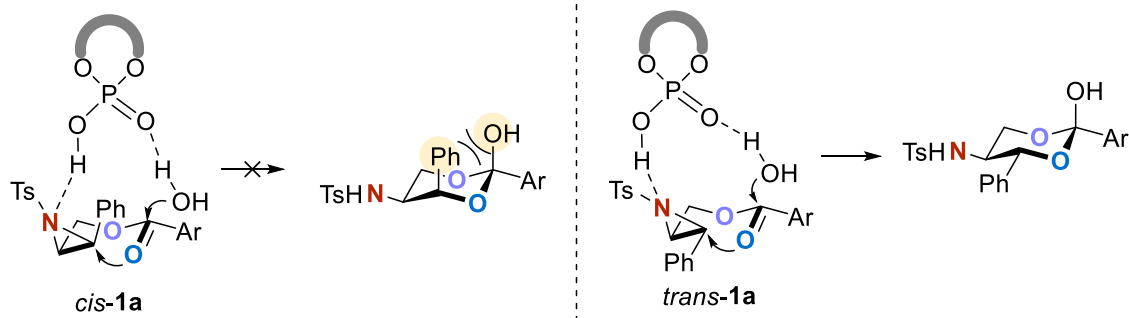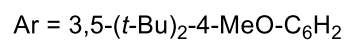

## References

- (1) C. Schütt, G. Heitmann, T. Wendler, B. Krahwinkel, R. Herges, *J. Org. Chem.* **2016**, *81*, 1206-1215.
- (2) D. X. Hu, G. M. Shibuya, N. Z. Burns, *J. Am. Chem. Soc.* **2013**, *135*, 12960-12963.
- (3) J. U. Jeong, B. Tao, I. Sagasser, H. Henniges, K. B. Sharpless, *J. Am. Chem. Soc.* **1998**, *120*, 6844-6845.
- (4) X. Feng, G. Qiu, S. Liang, J. Su, H. Teng, L. Wu, X. Hu, *Russ. J. Org Chem.* **2006**, *42*, 496-500.
- (5) S.-T. Yuan, H. Zhou, L. Gao, J.-B. Liu, G. Qiu, *Org. Lett.* **2018**, *20*, 562-565.

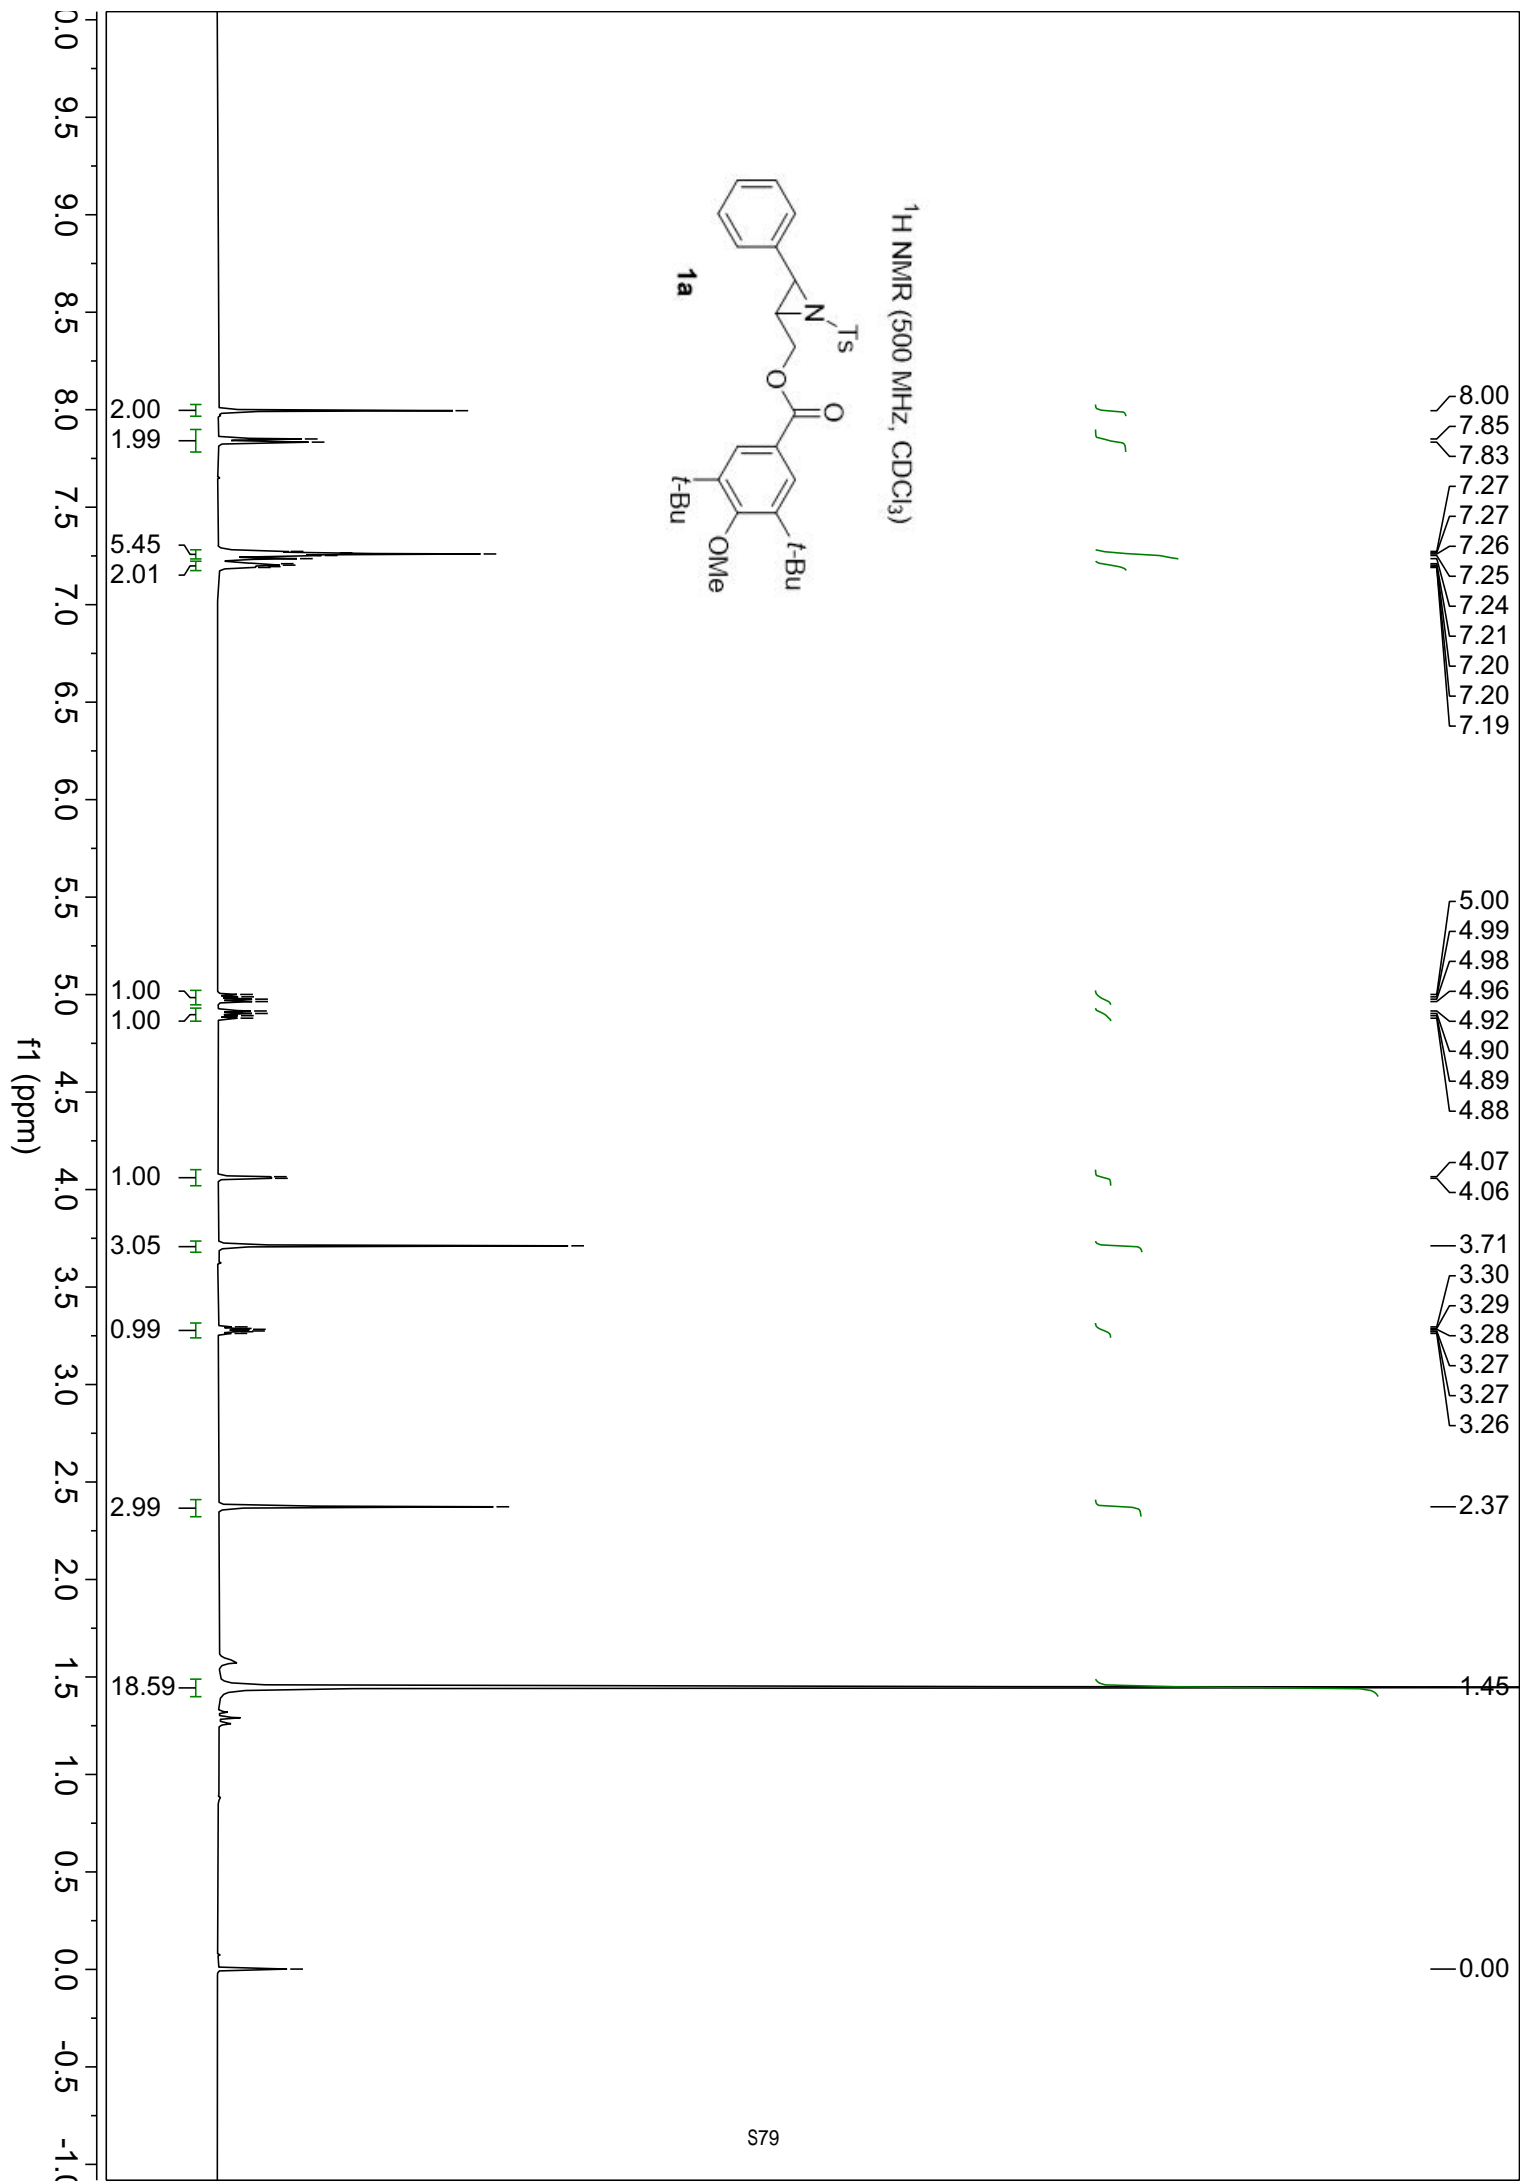

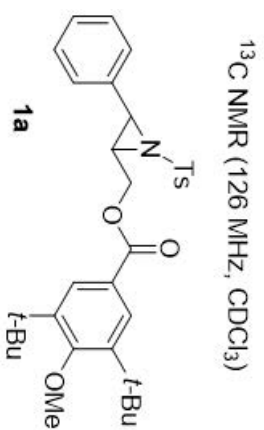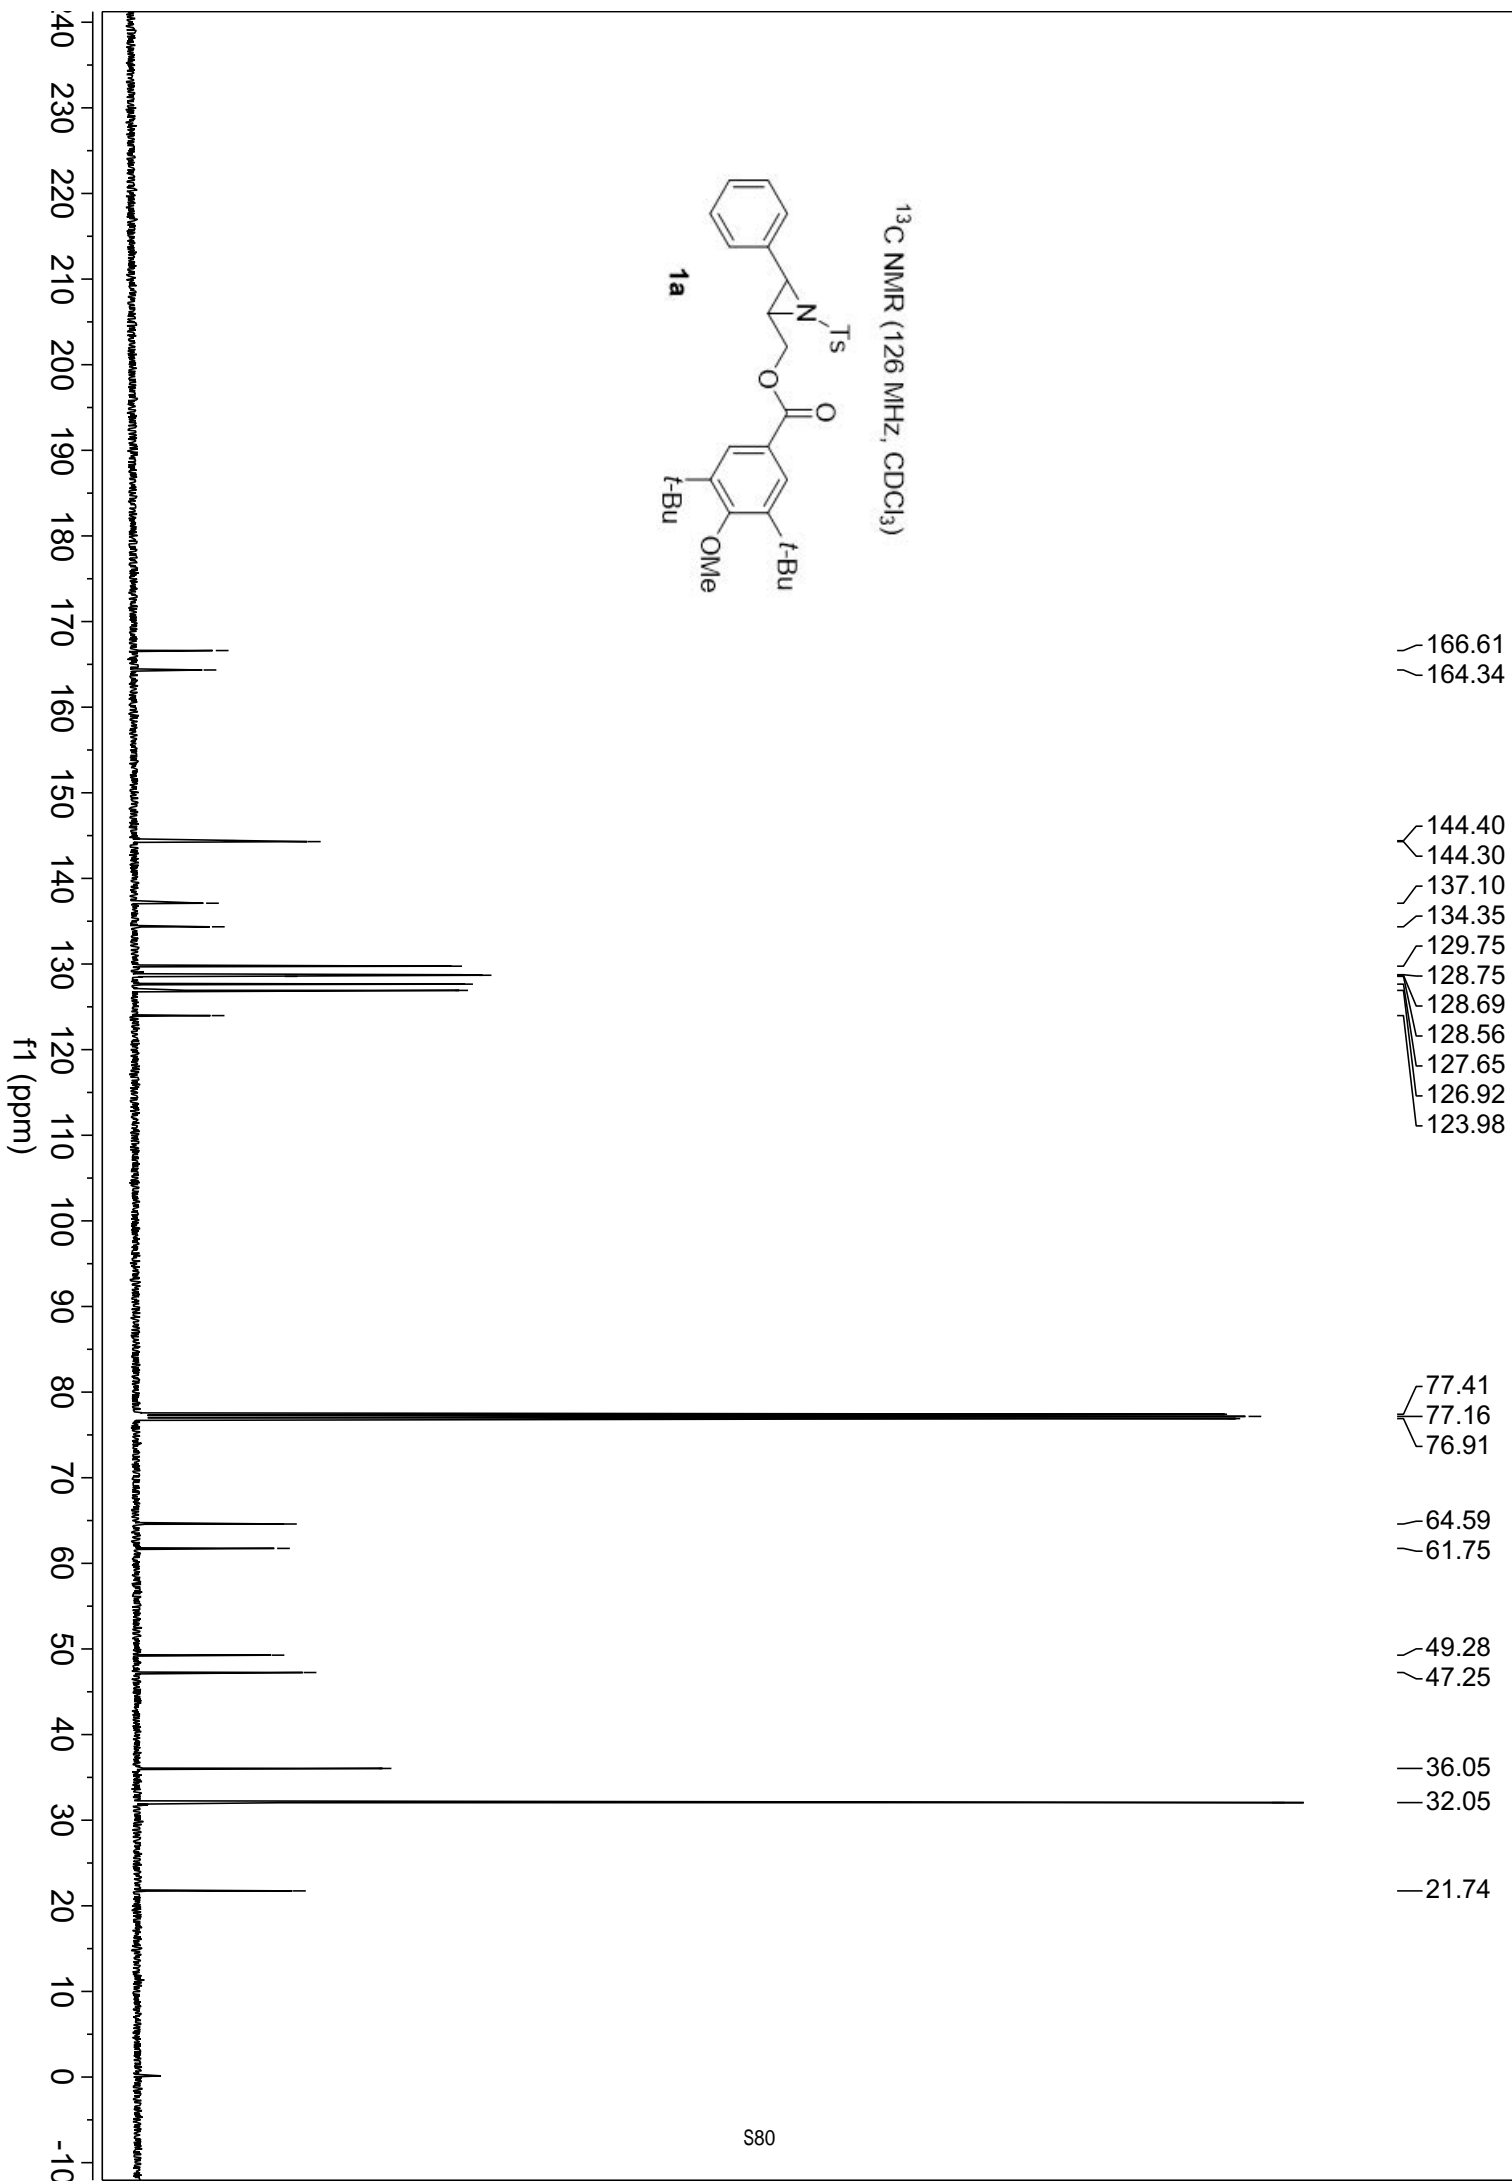



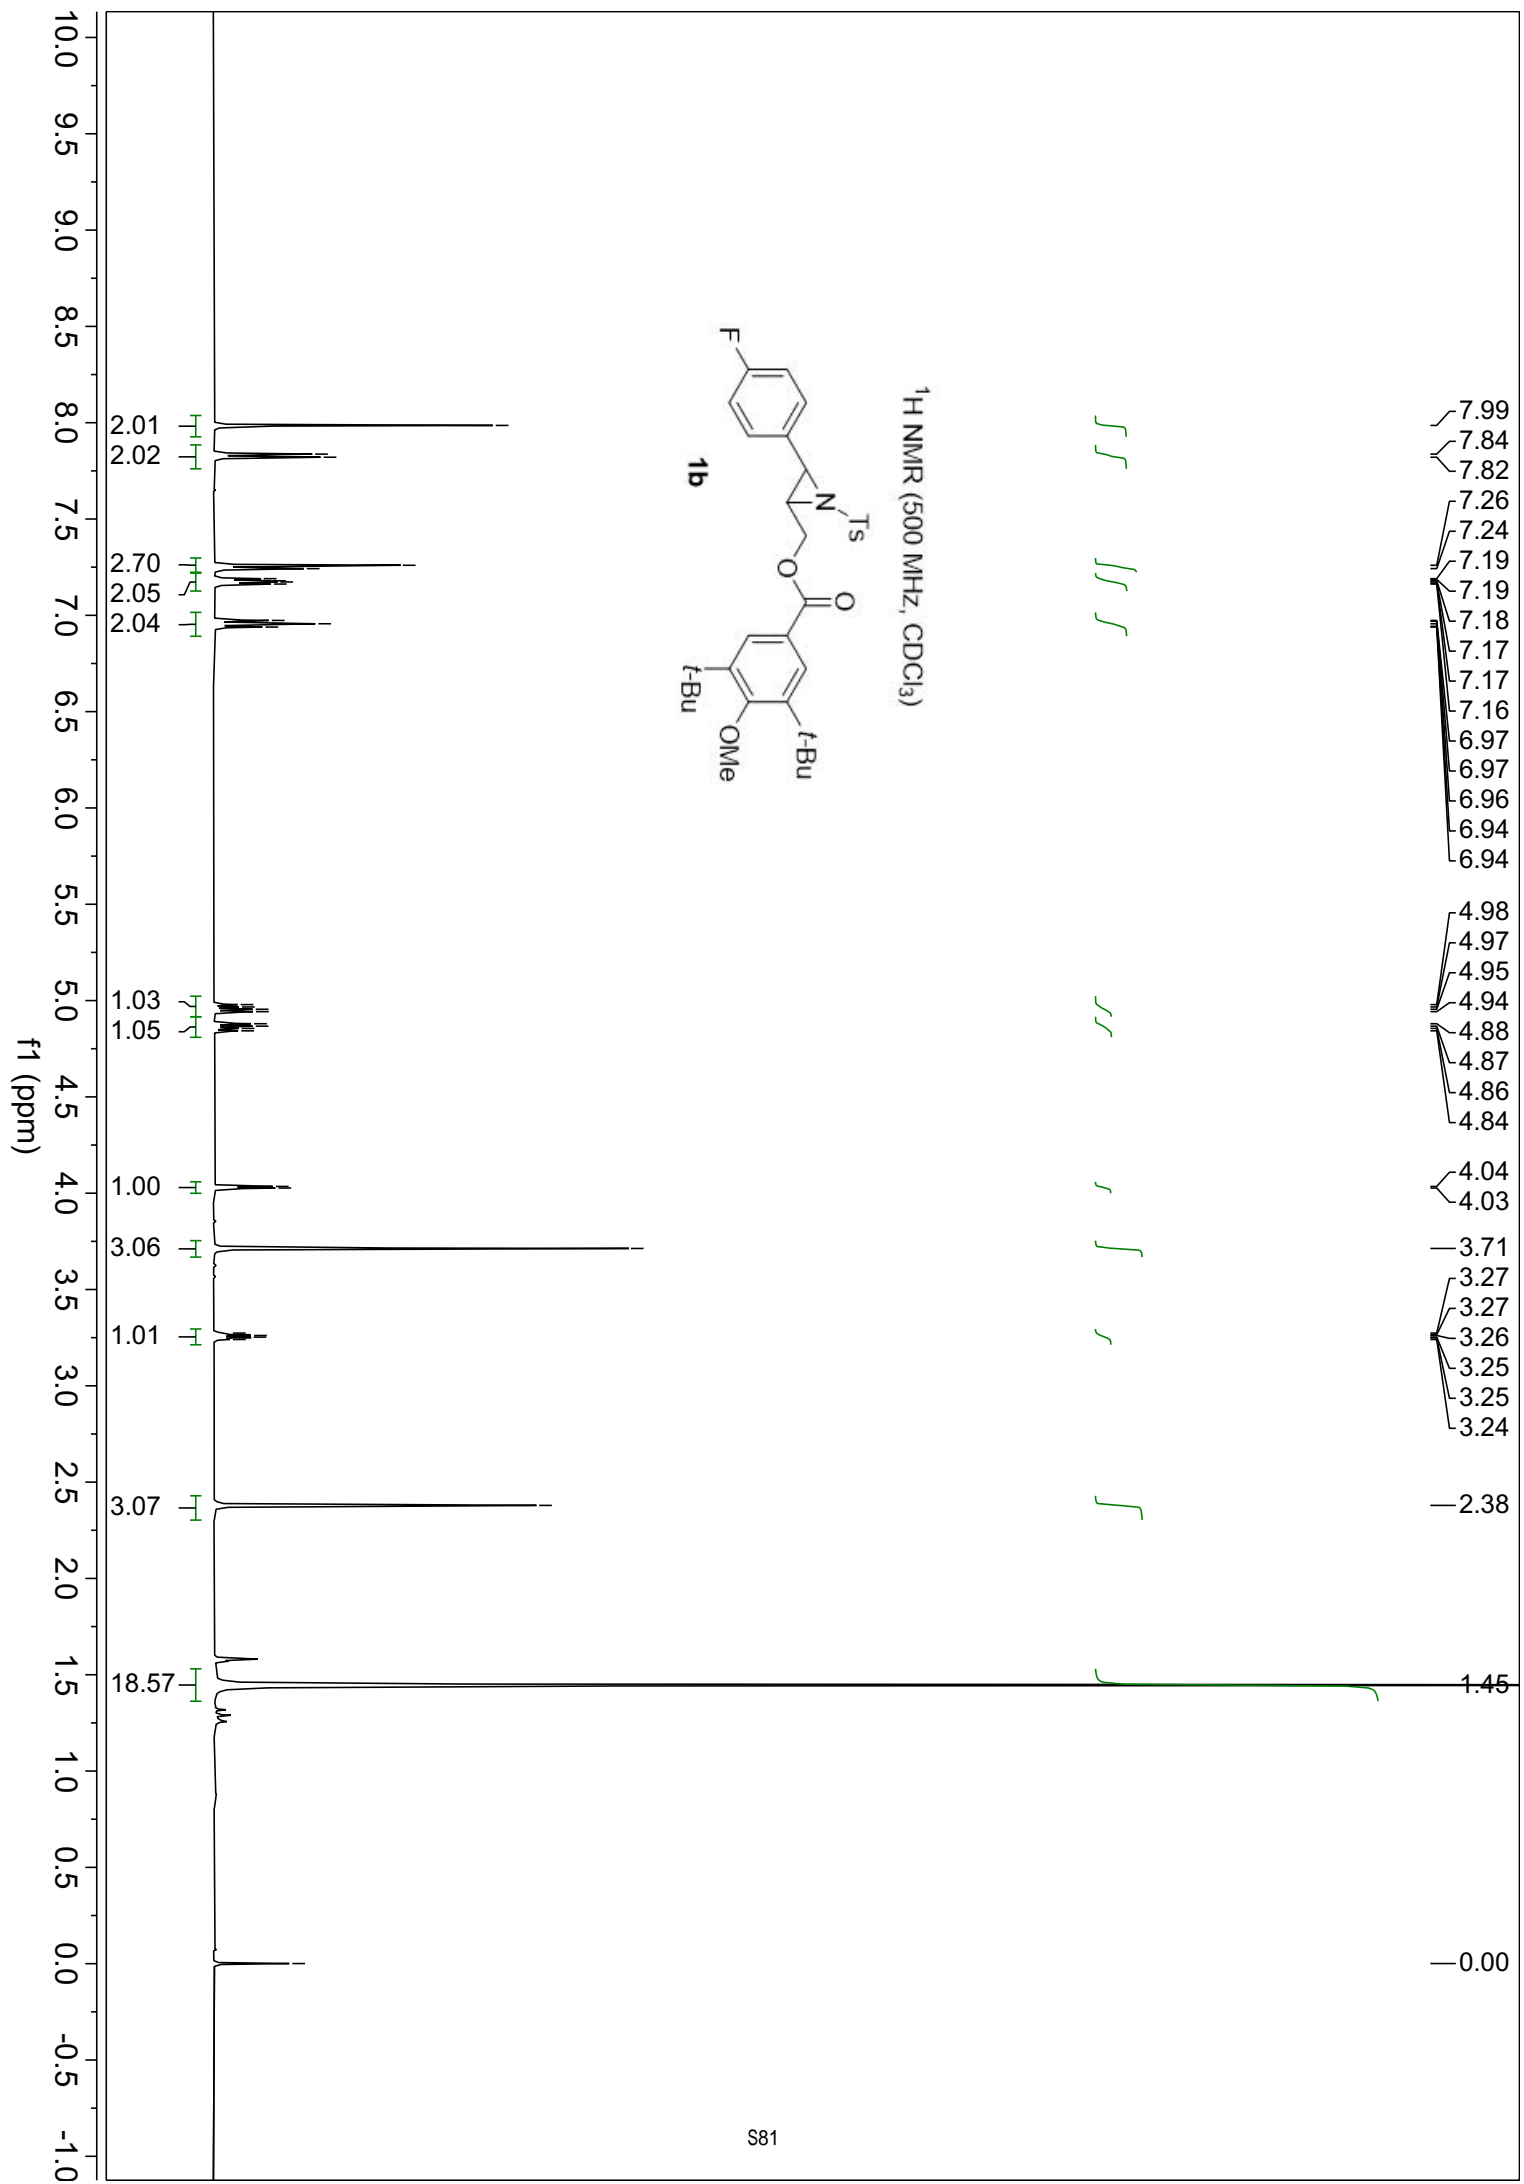

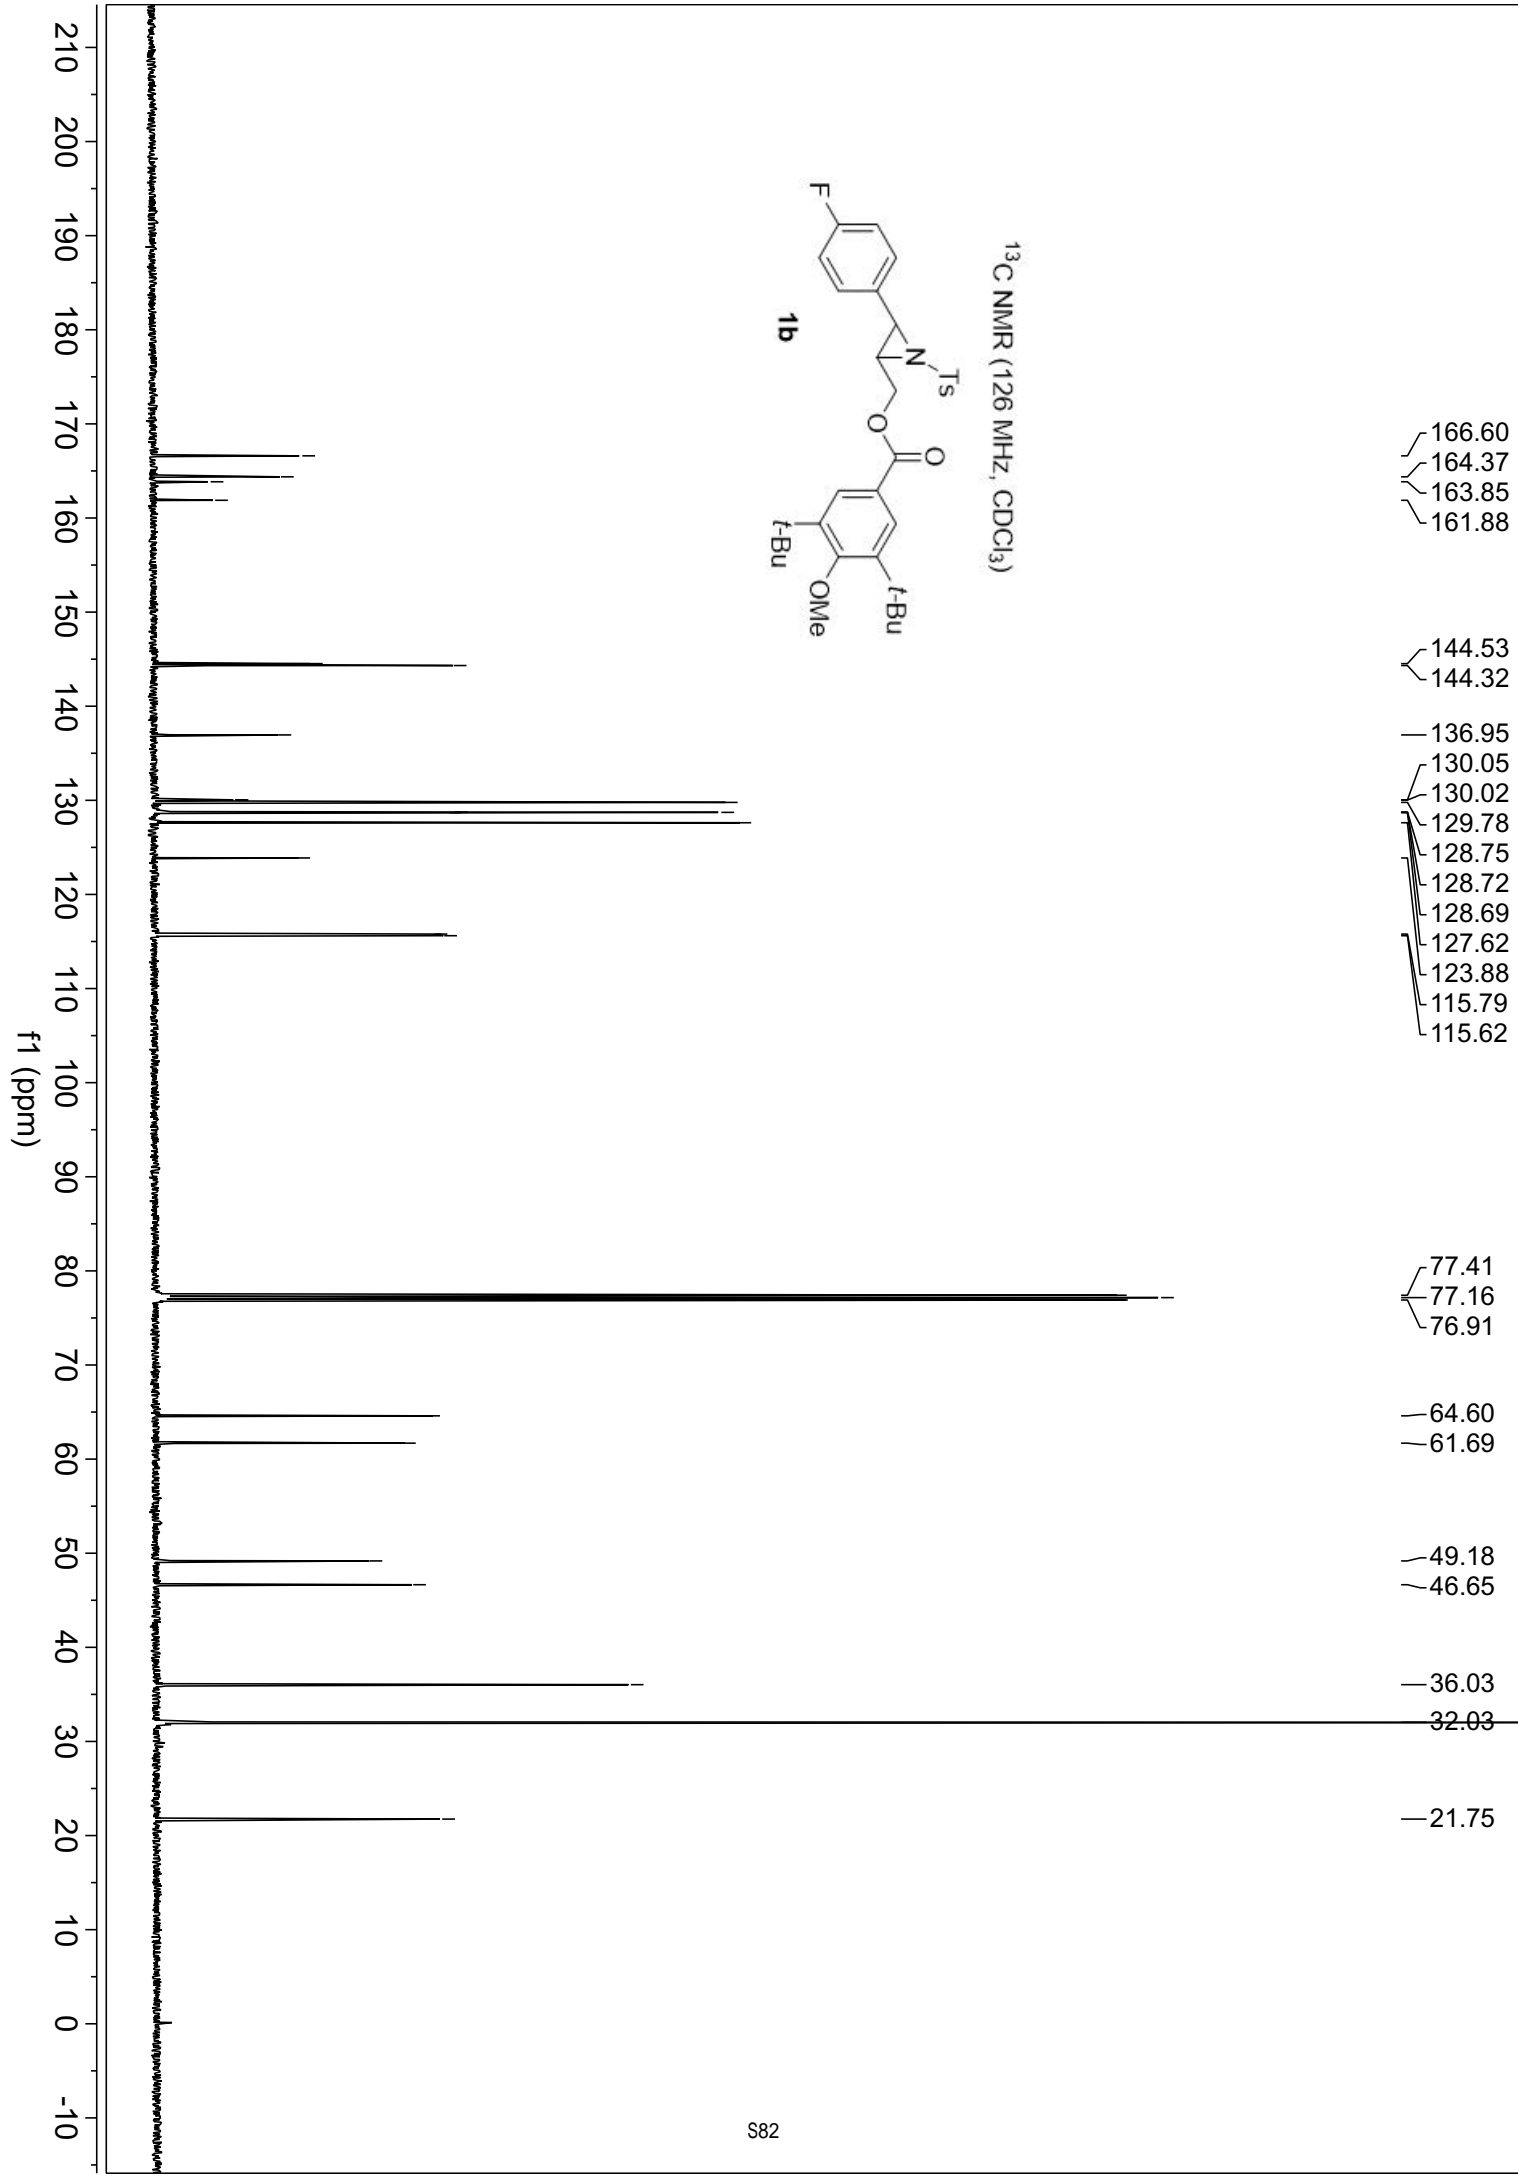

— -113.06

<sup>19</sup>F NMR (471 MHz, CDCl<sub>3</sub>)

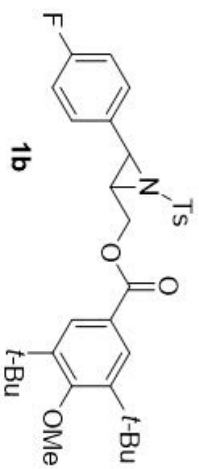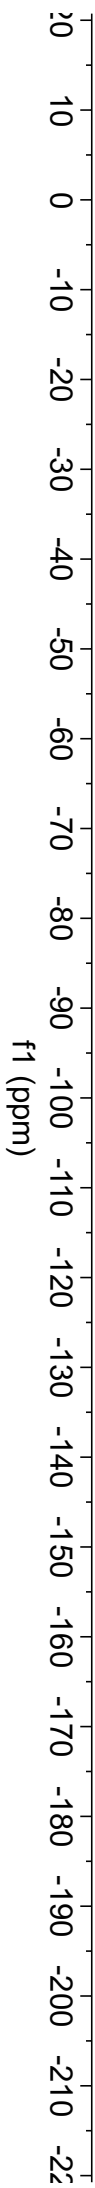

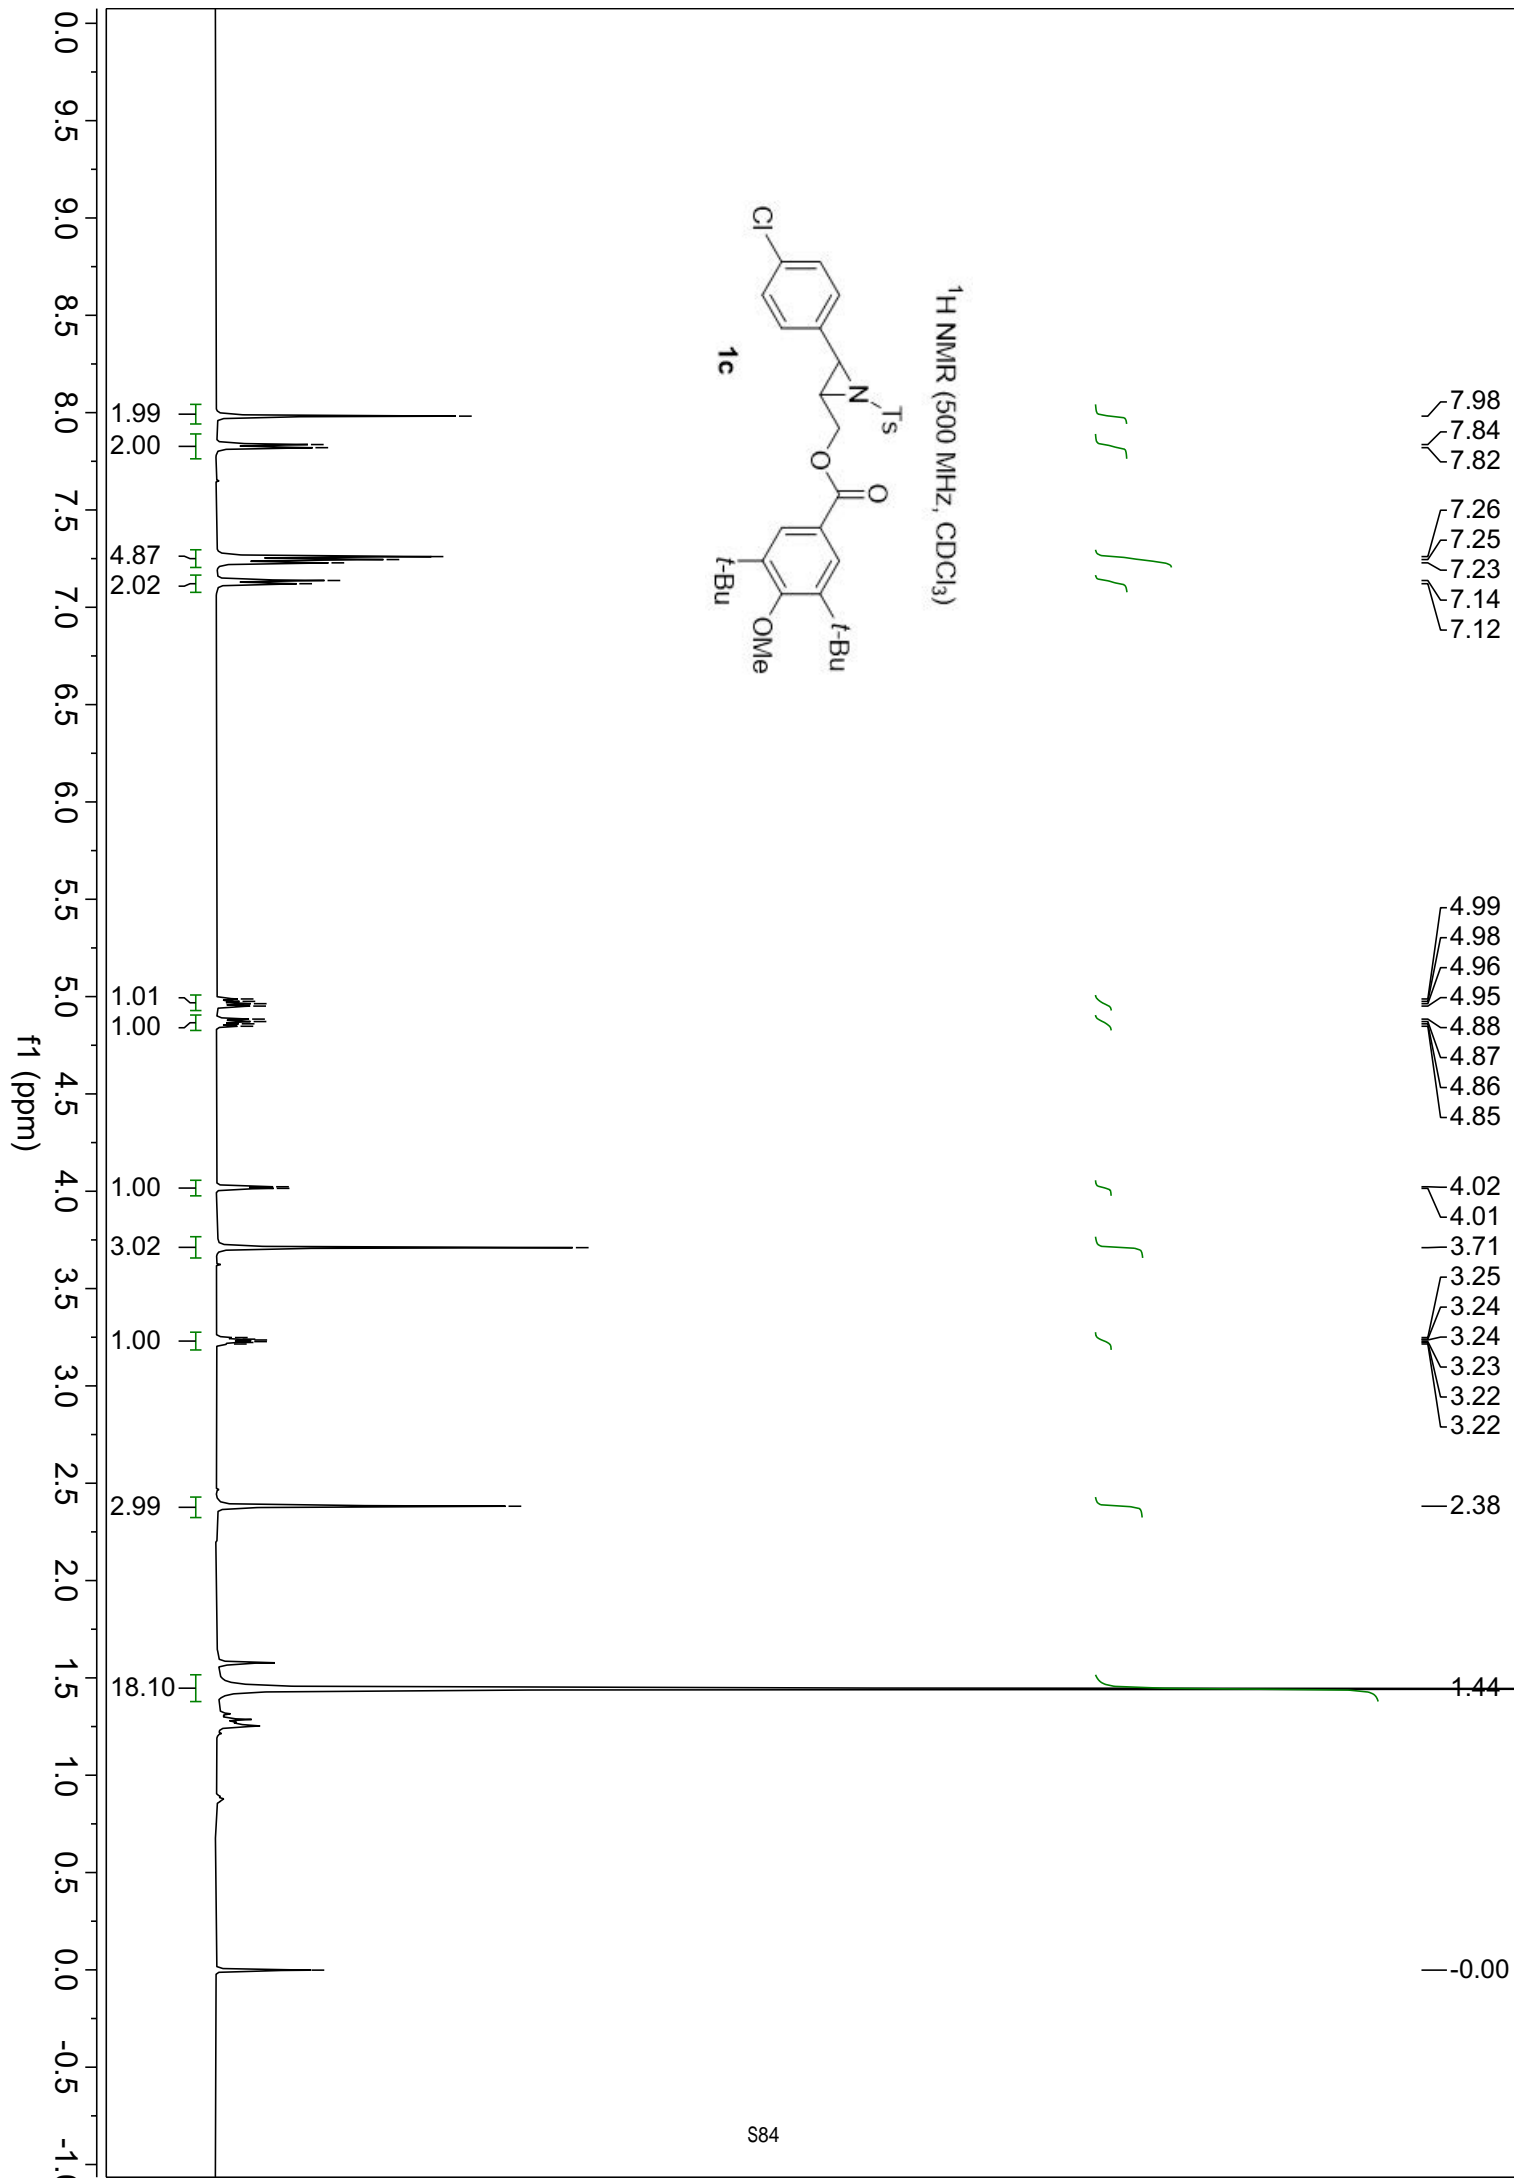

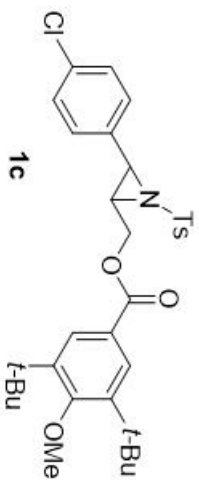

<sup>13</sup>C NMR (126 MHz, CDCl<sub>3</sub>)

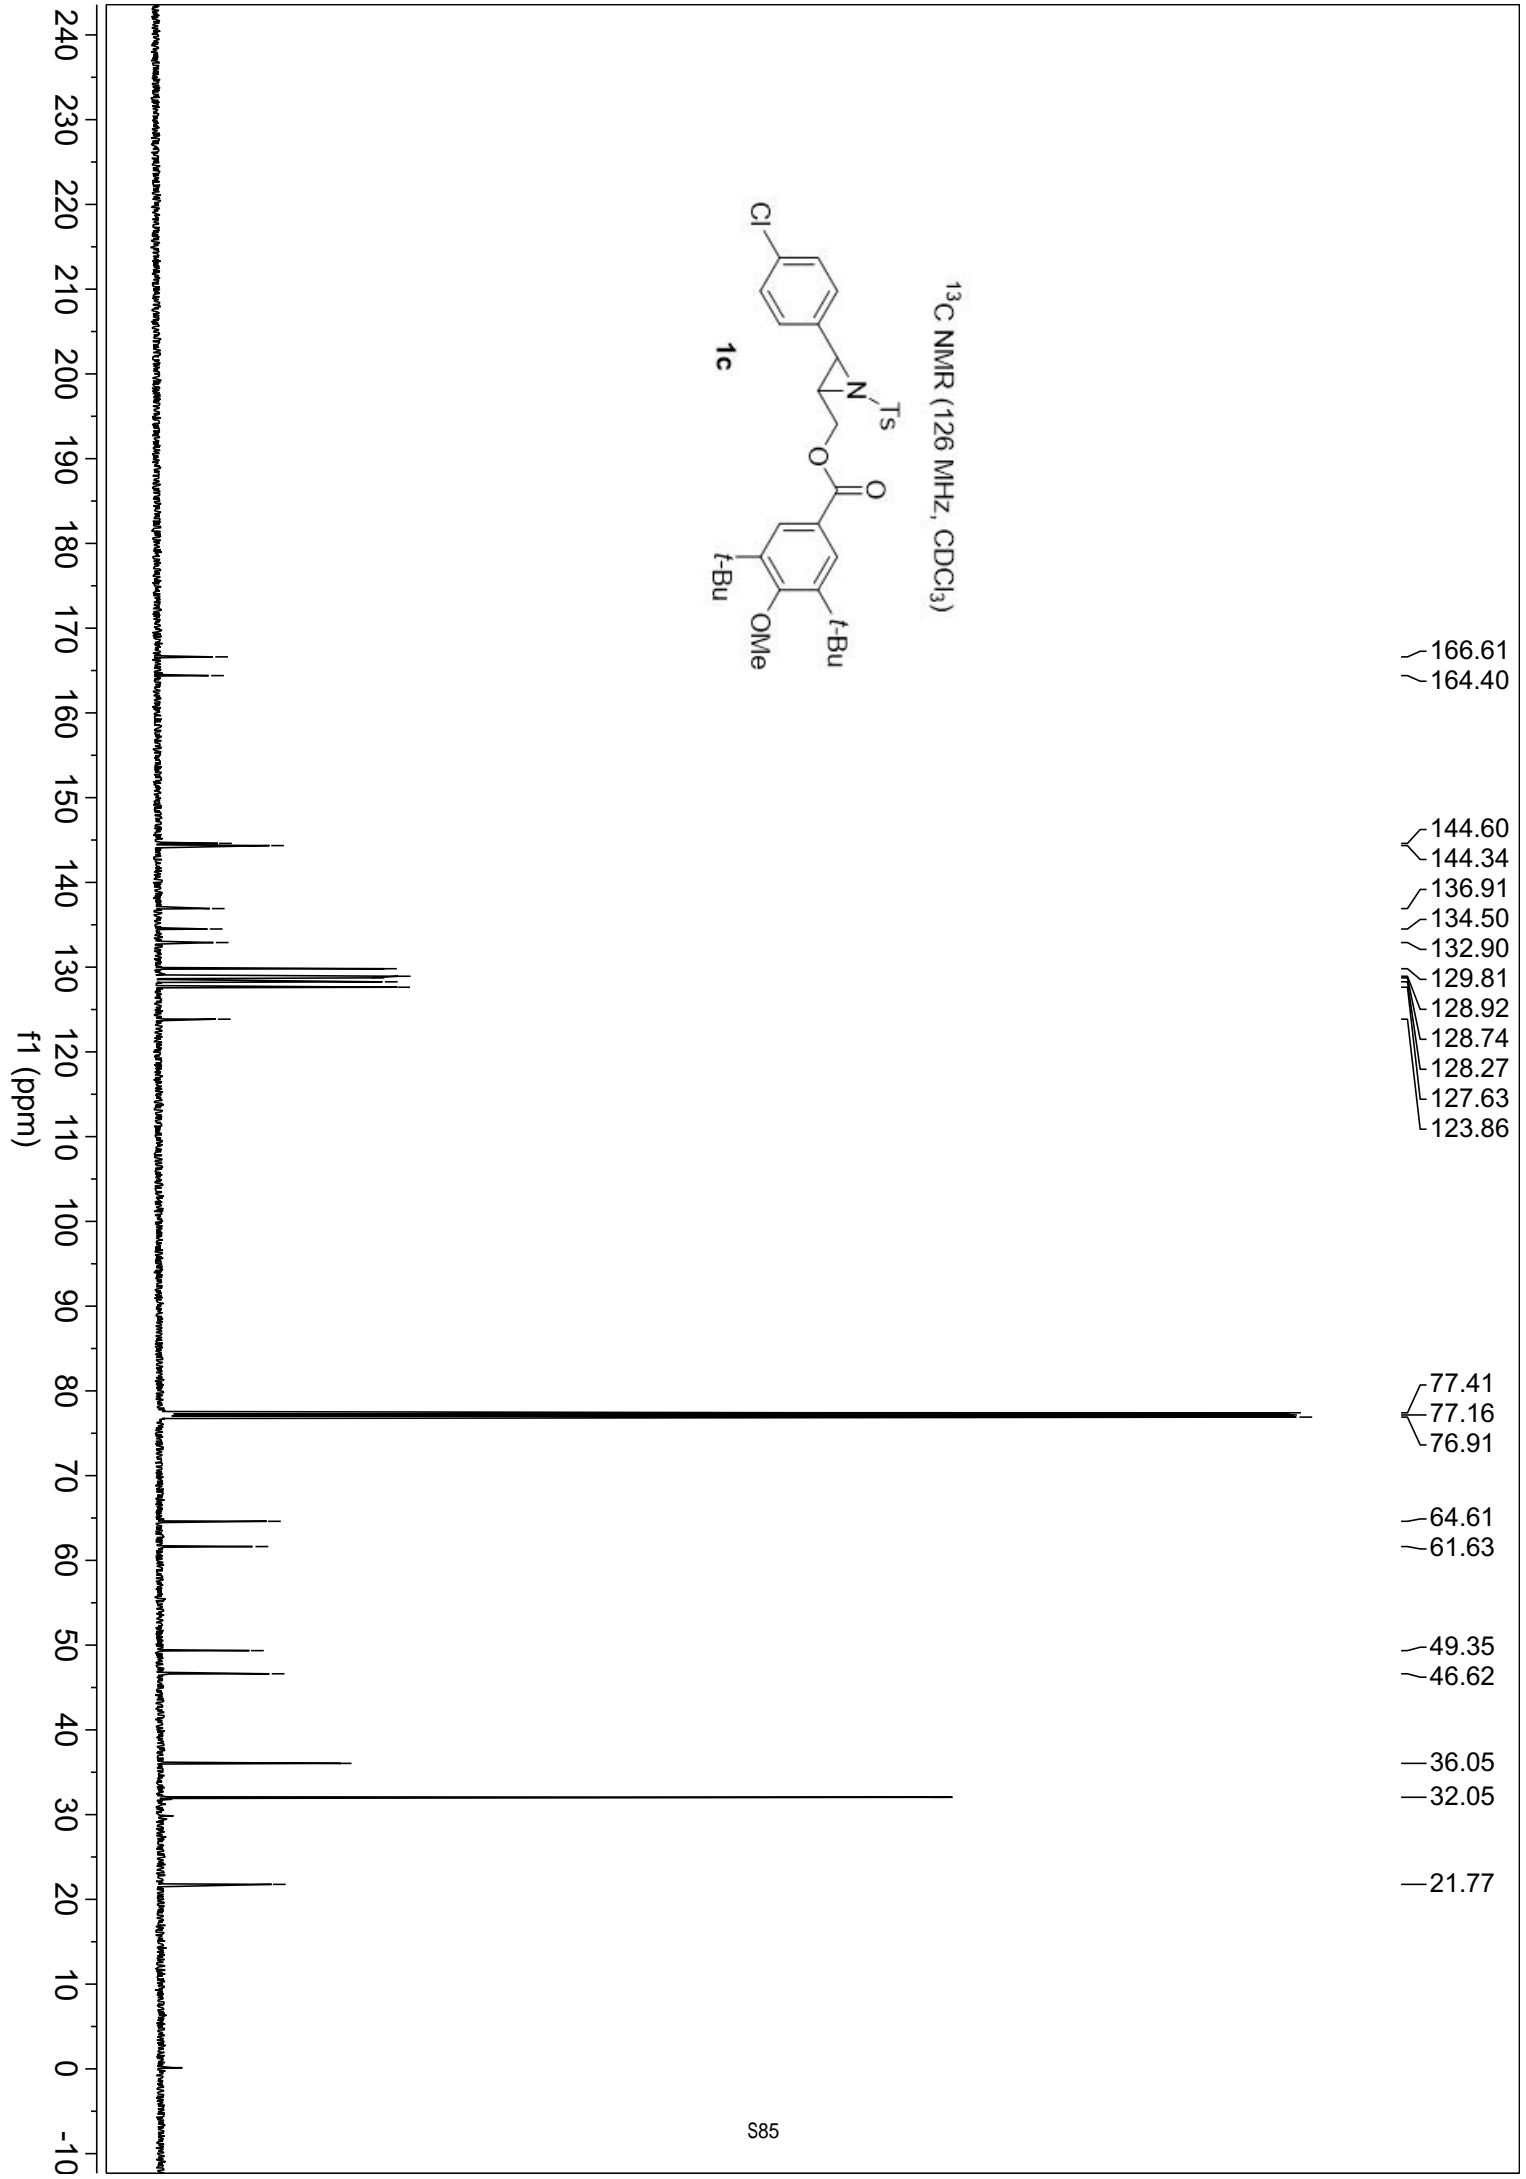

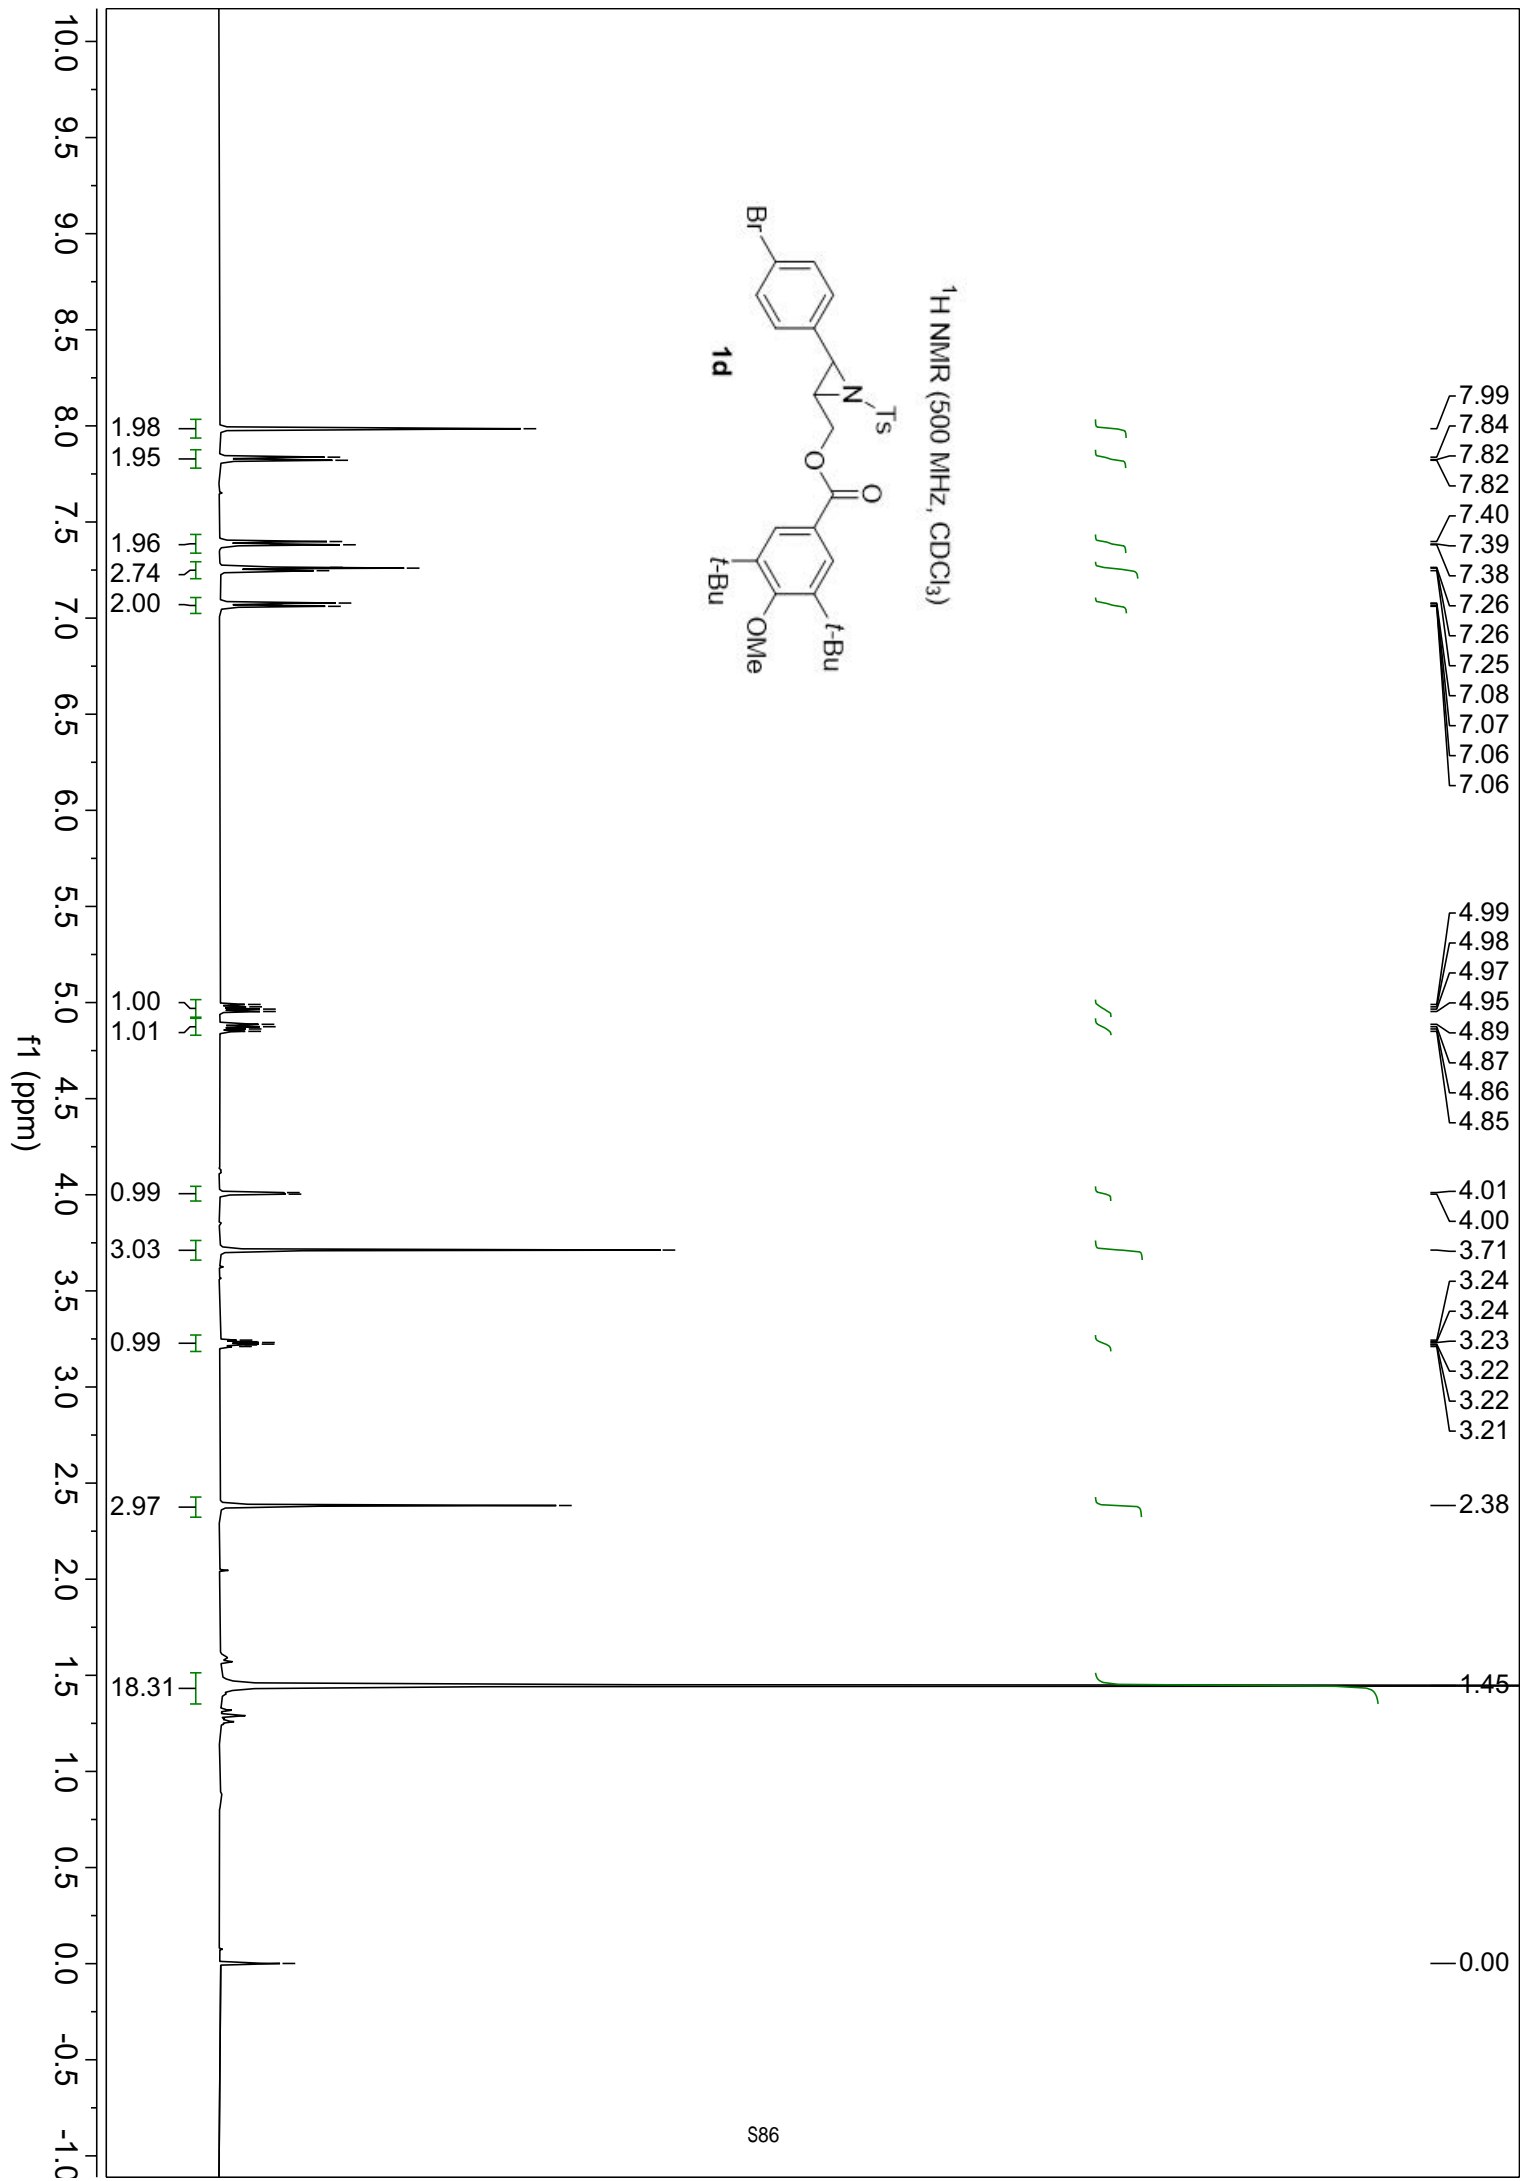



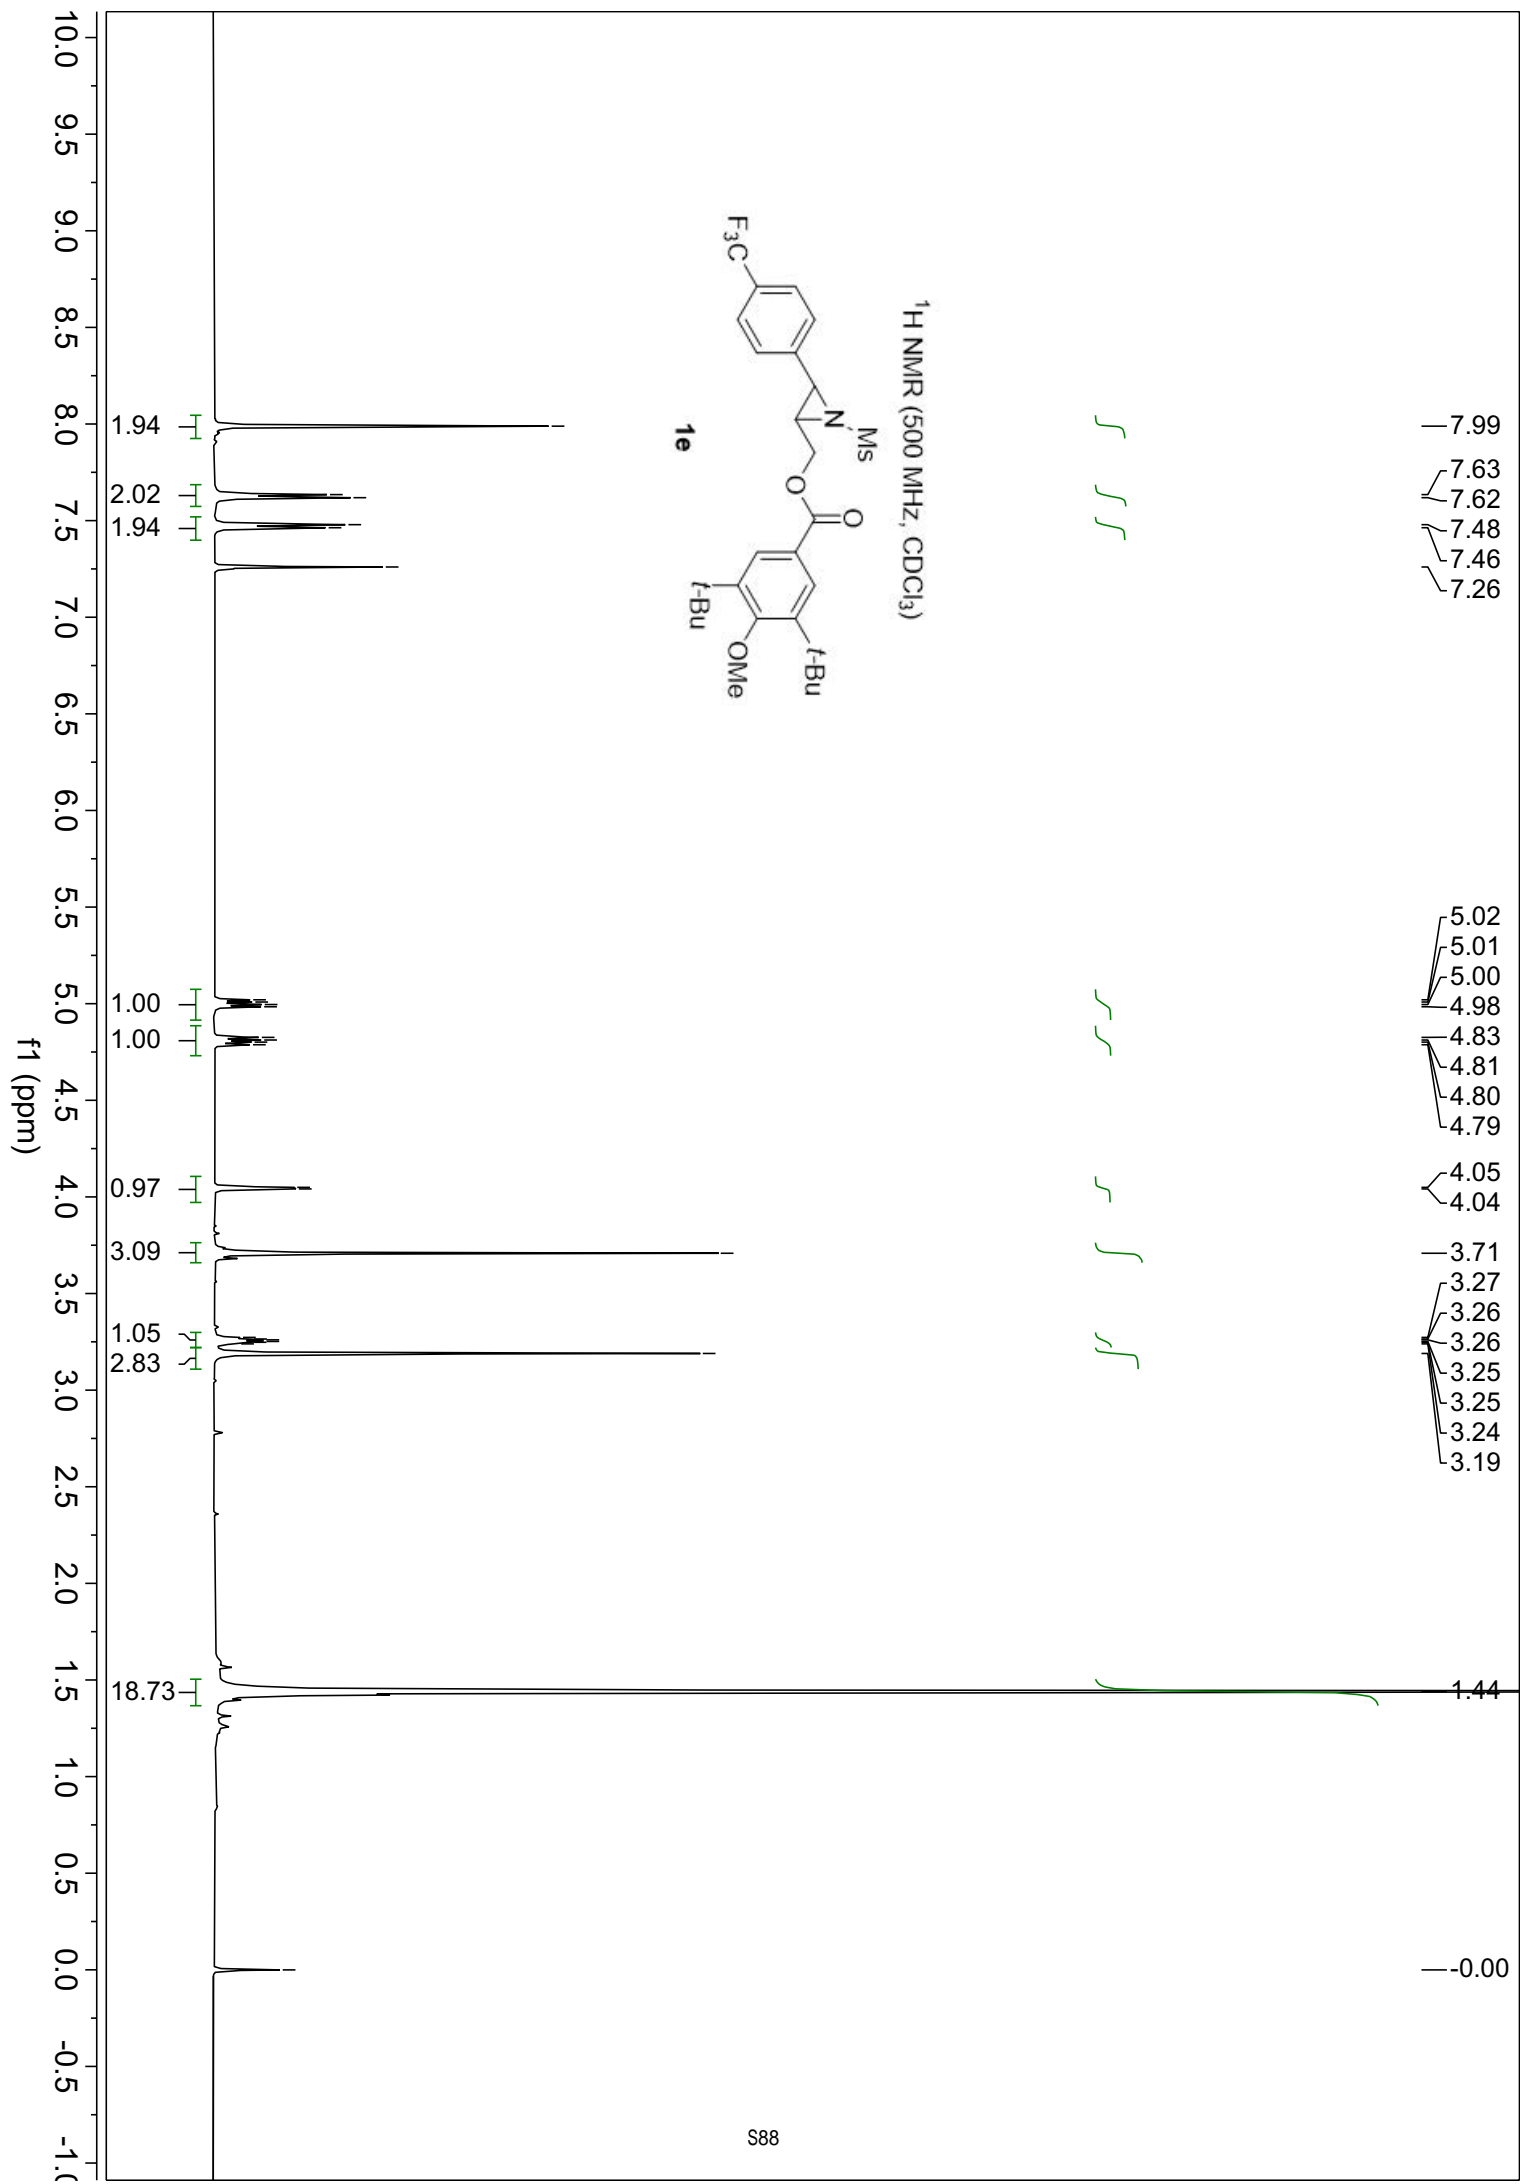



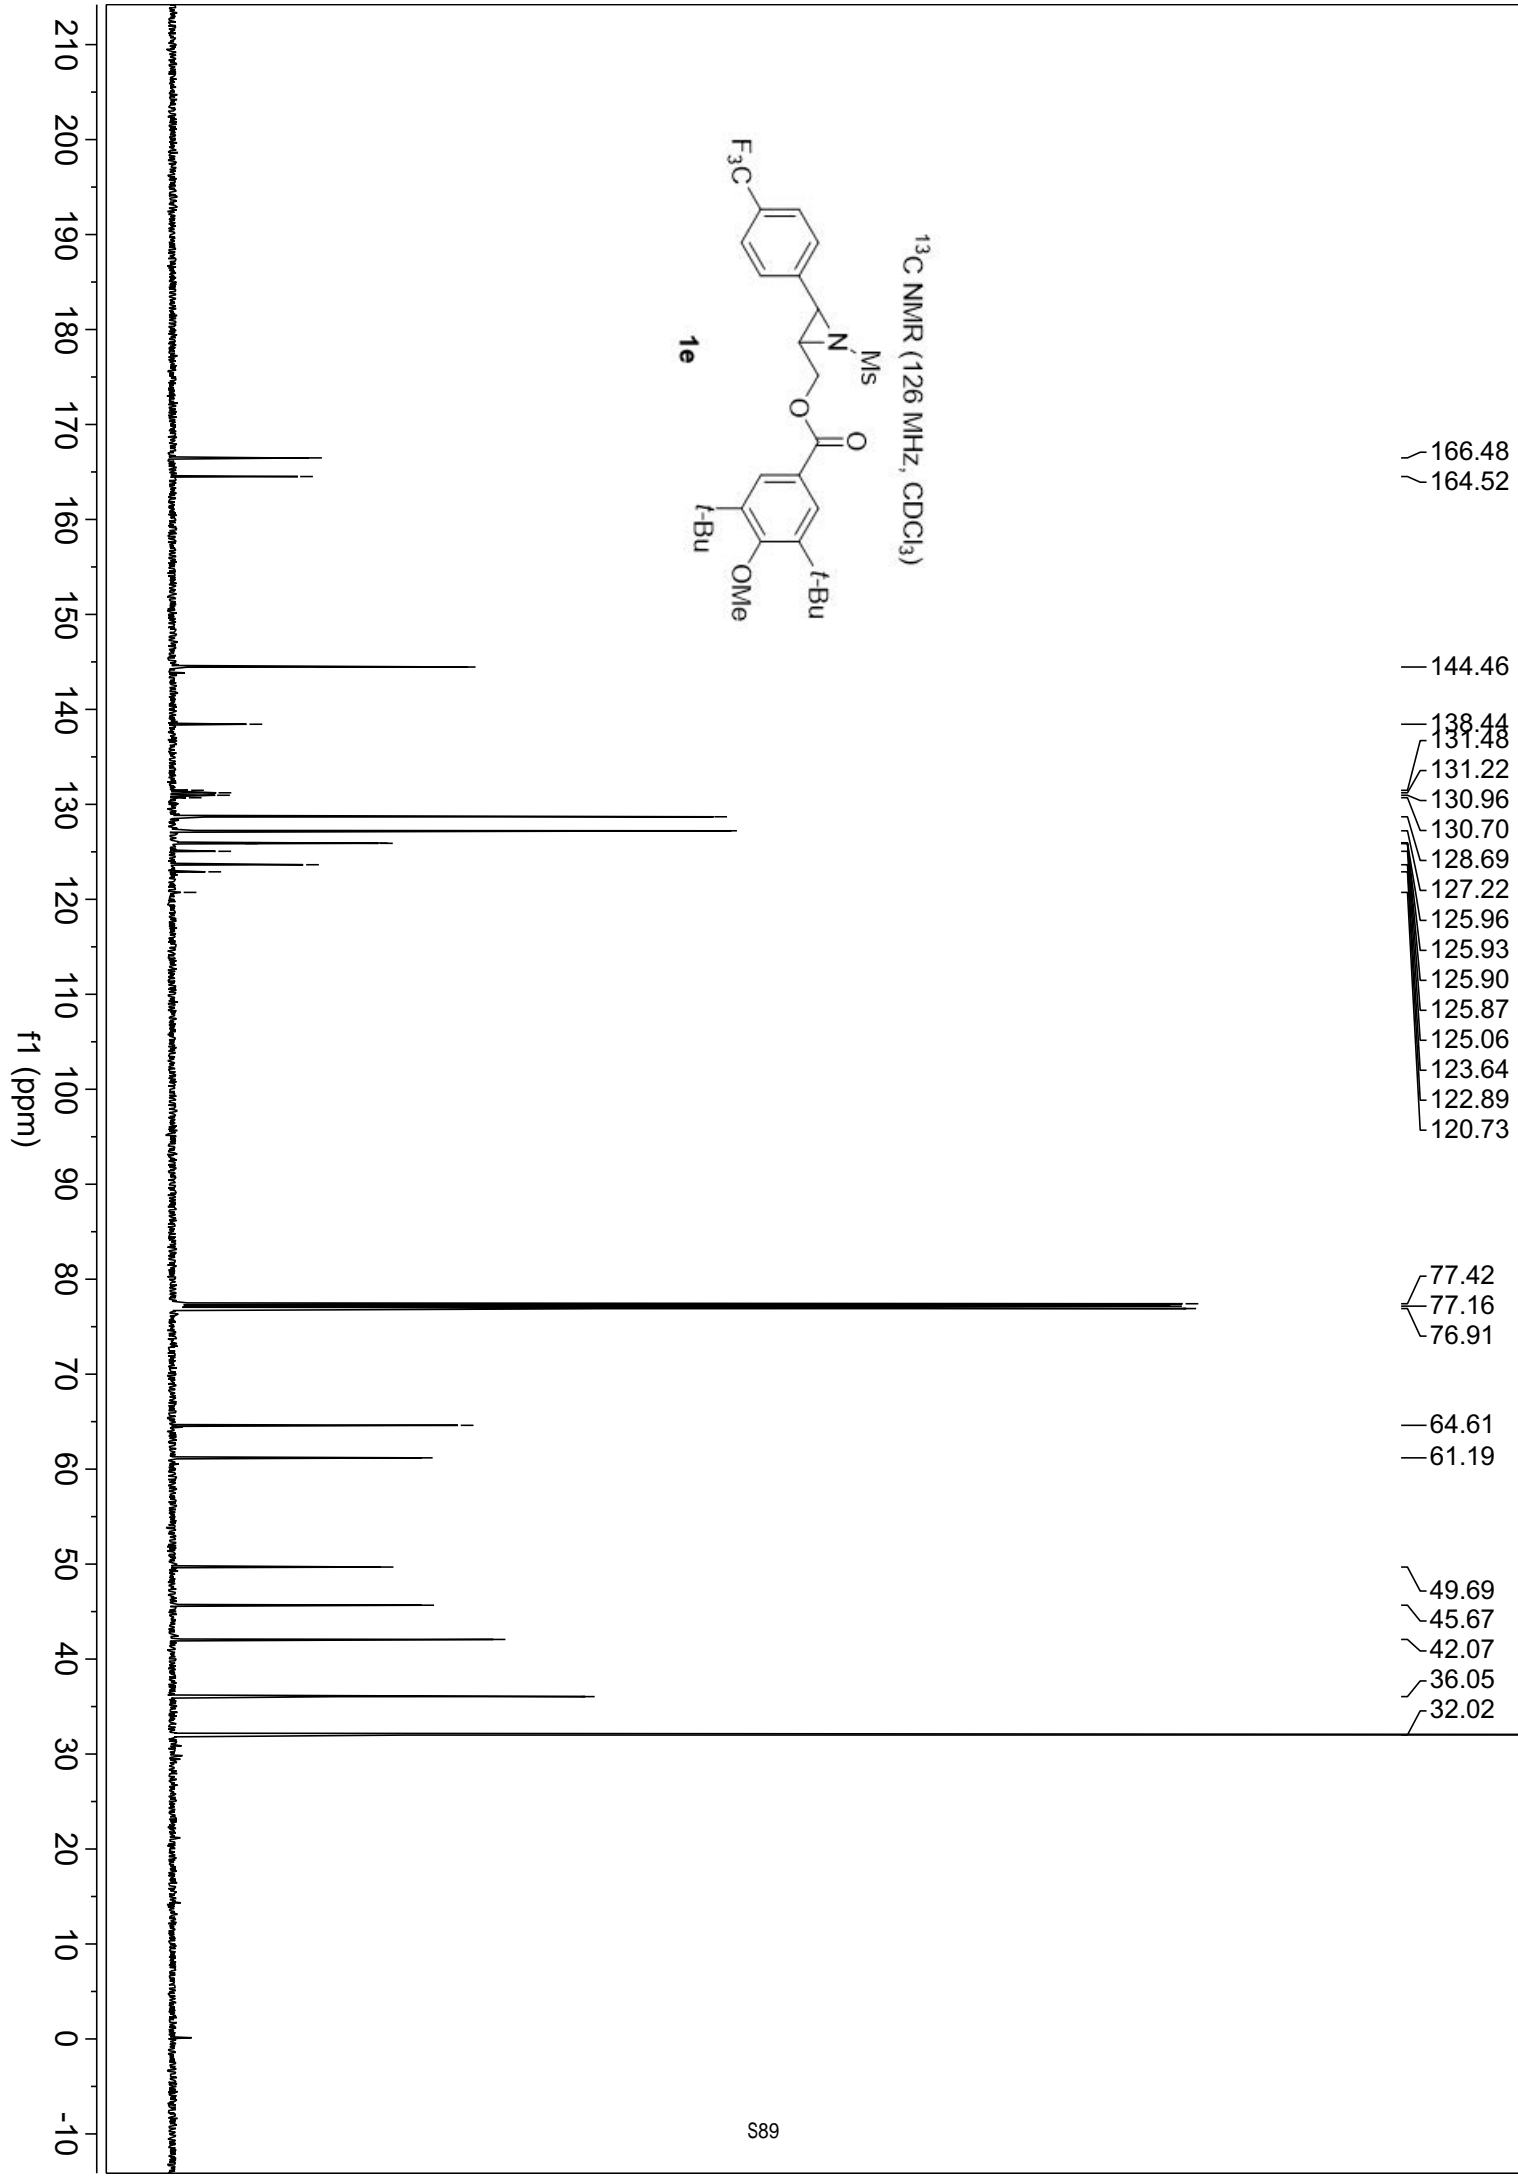

-62.69

$^{19}\text{F}$  NMR (471 MHz,  $\text{CDCl}_3$ )

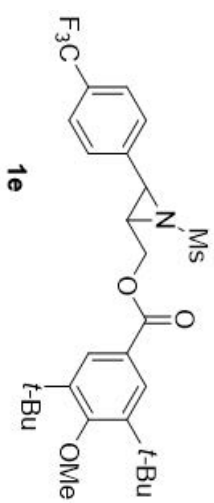

S90

20 10 0 -10 -20 -30 -40 -50 -60 -70 -80 -90 -100 -110 -120 -130 -140 -150 -160 -170 -180 -190 -200 -210 -220  
f1 (ppm)

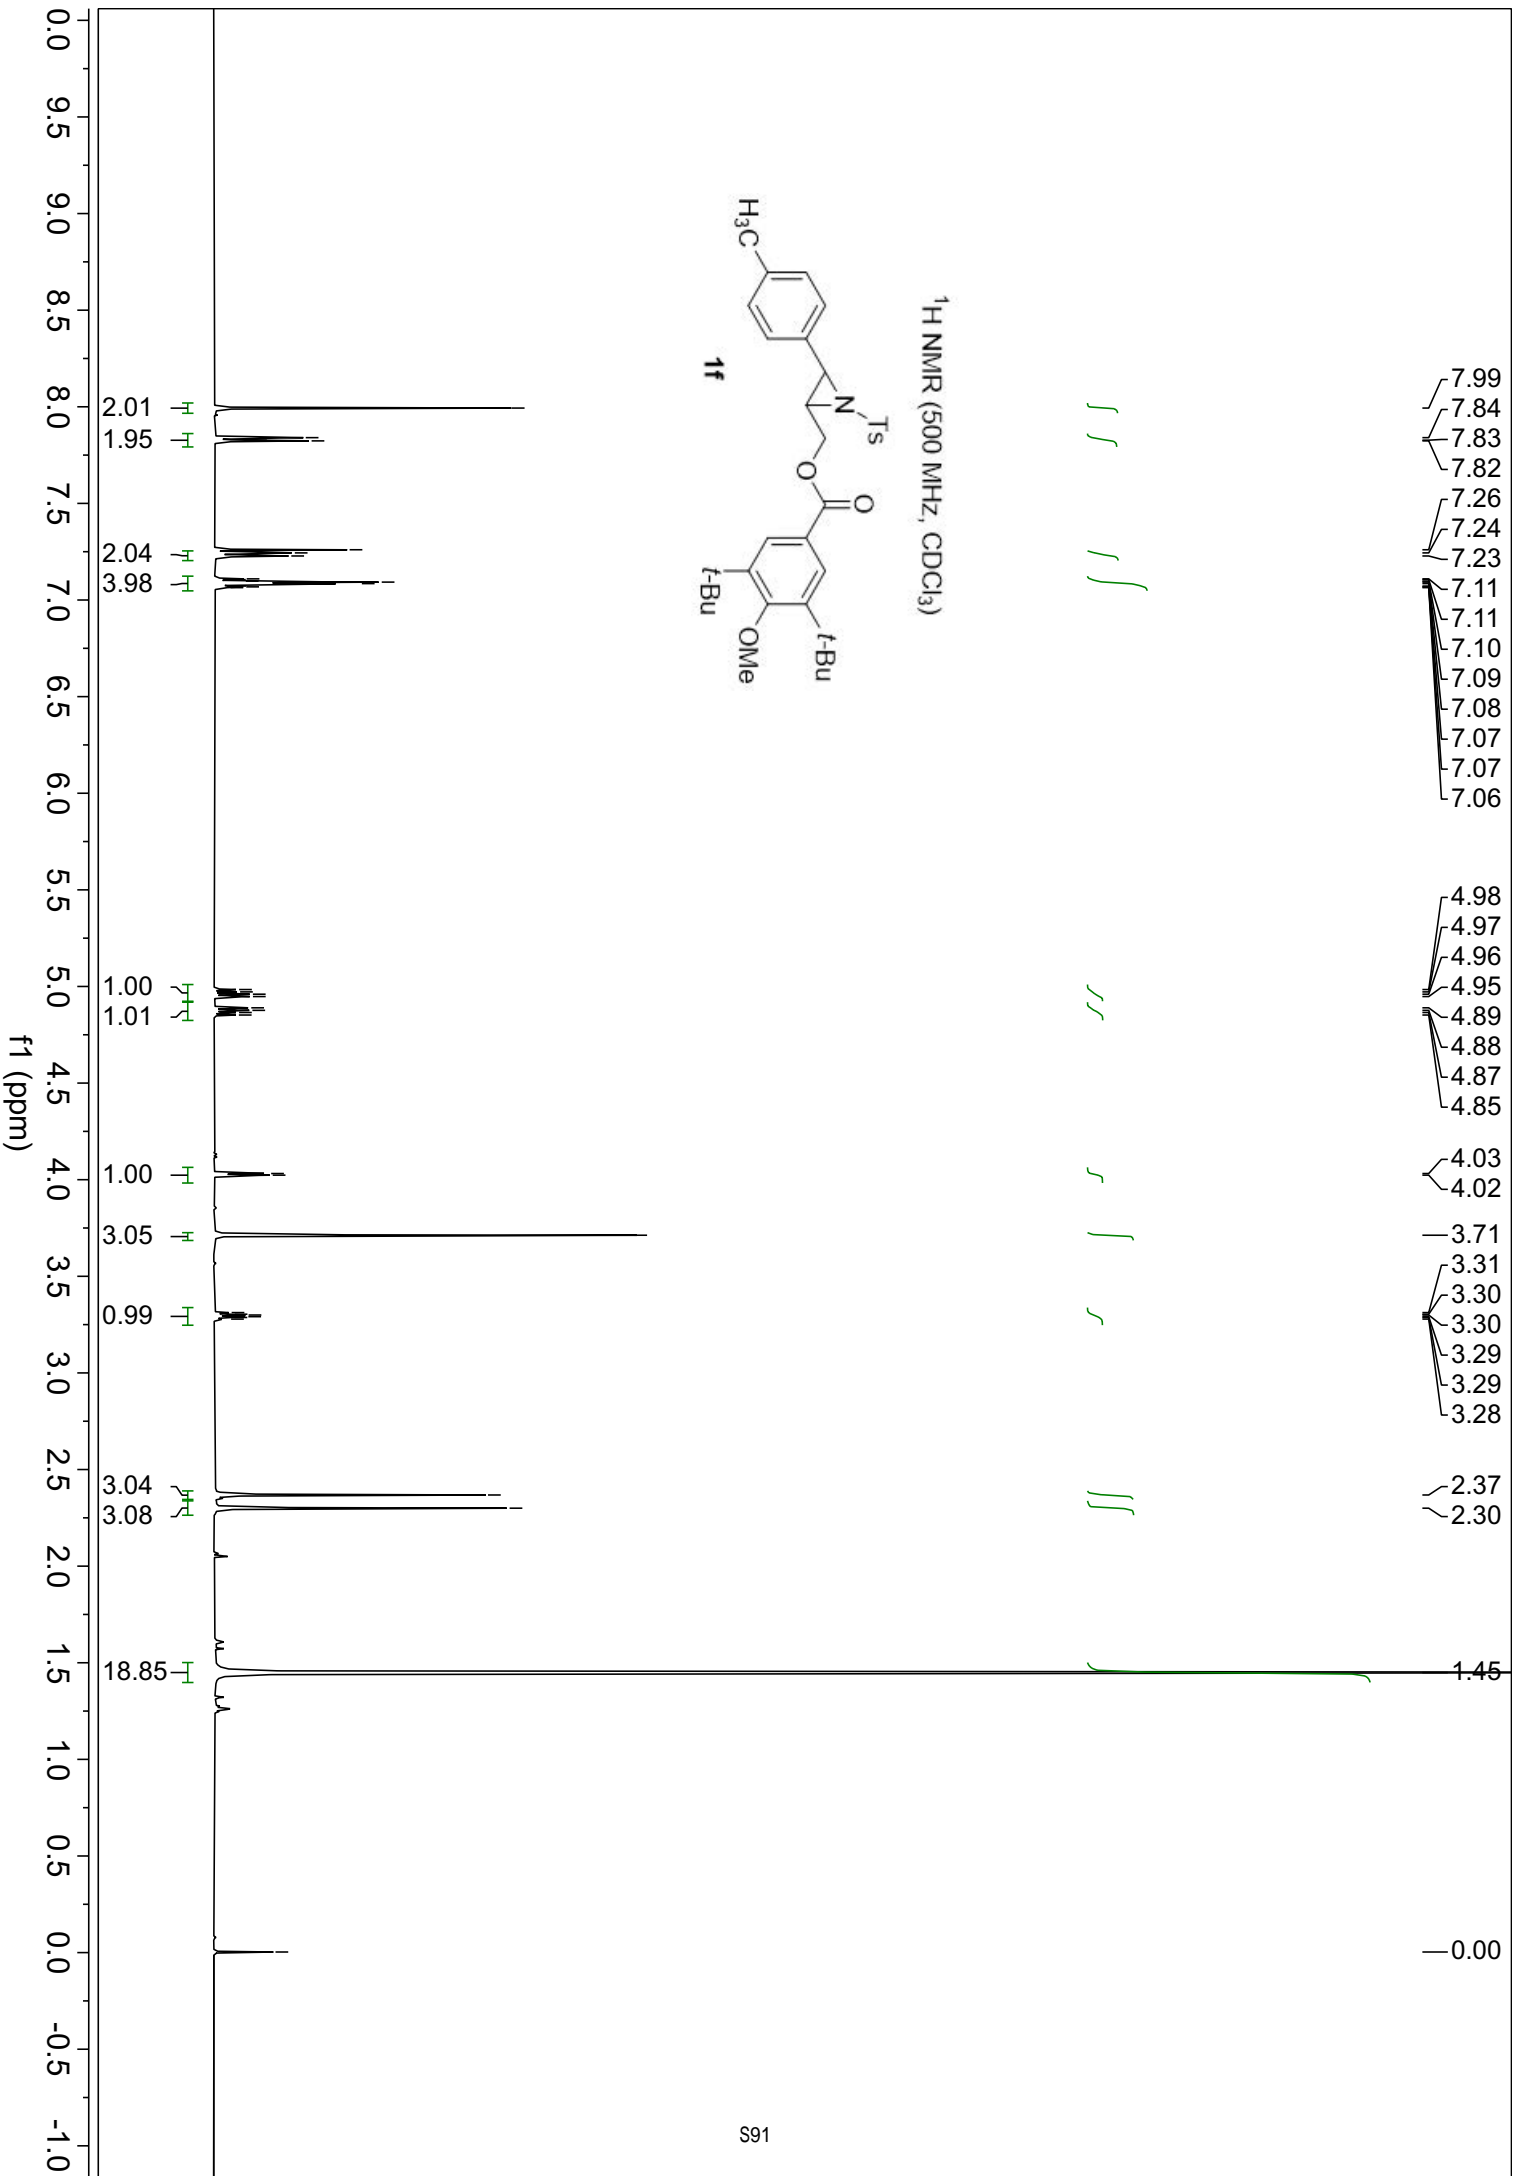

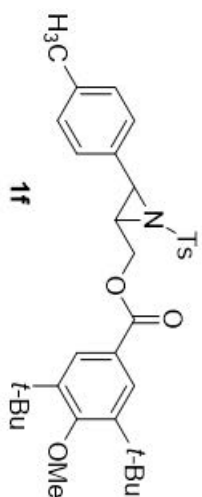

<sup>13</sup>C NMR (126 MHz, CDCl<sub>3</sub>)

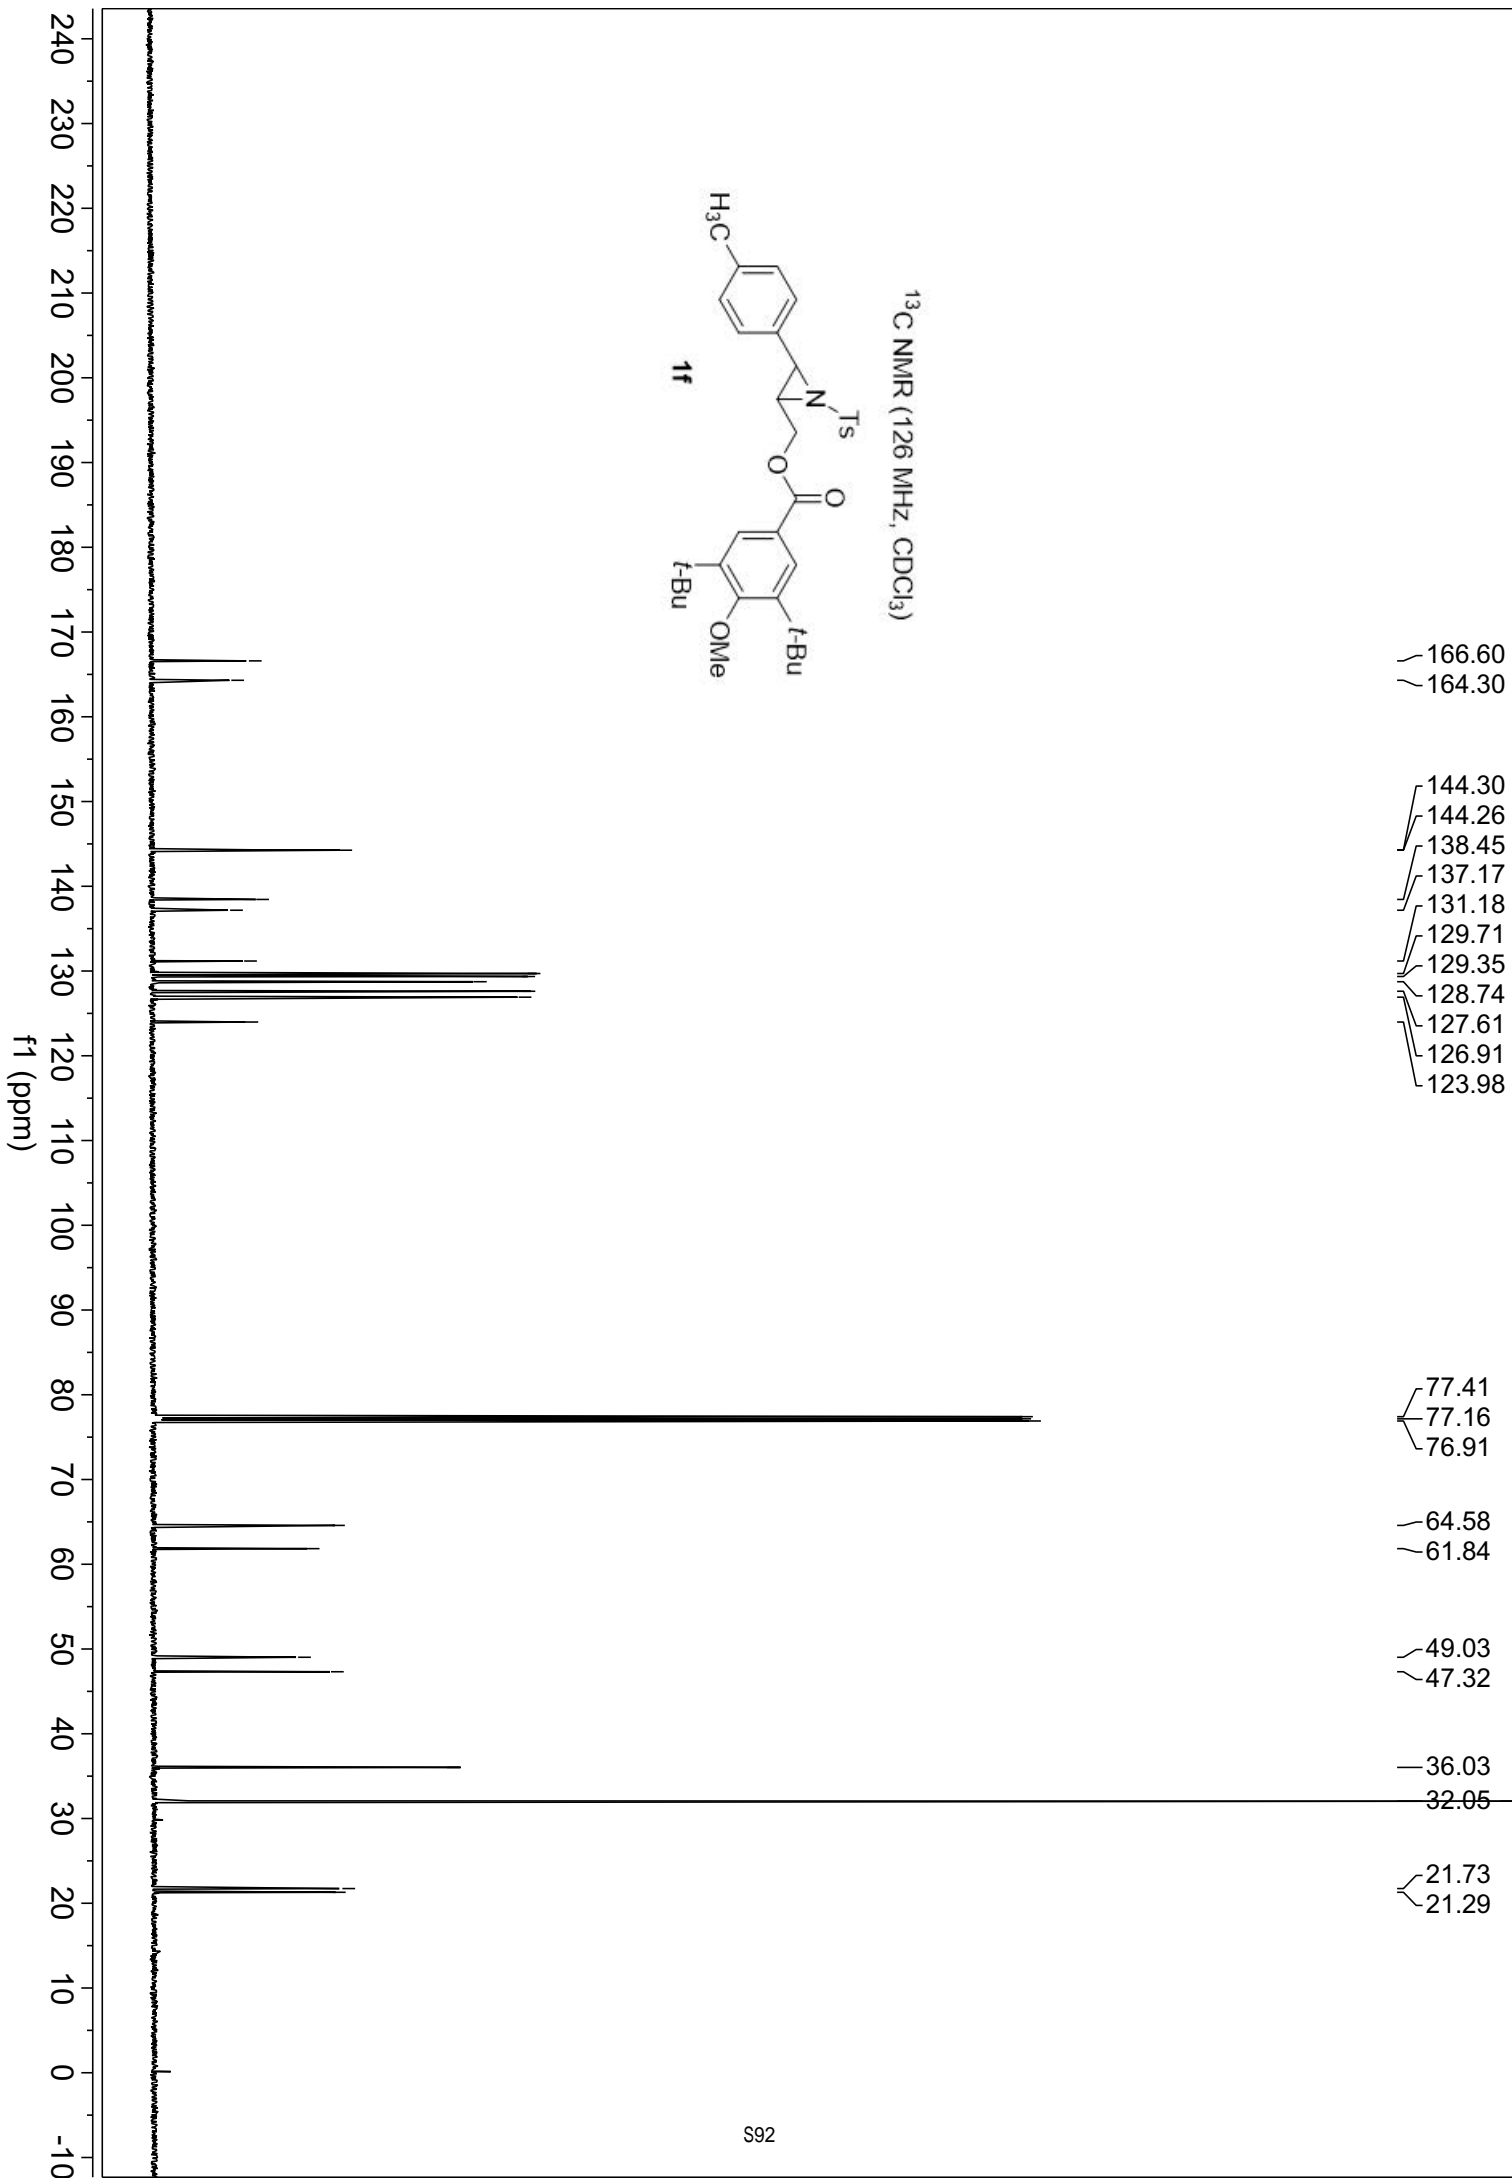

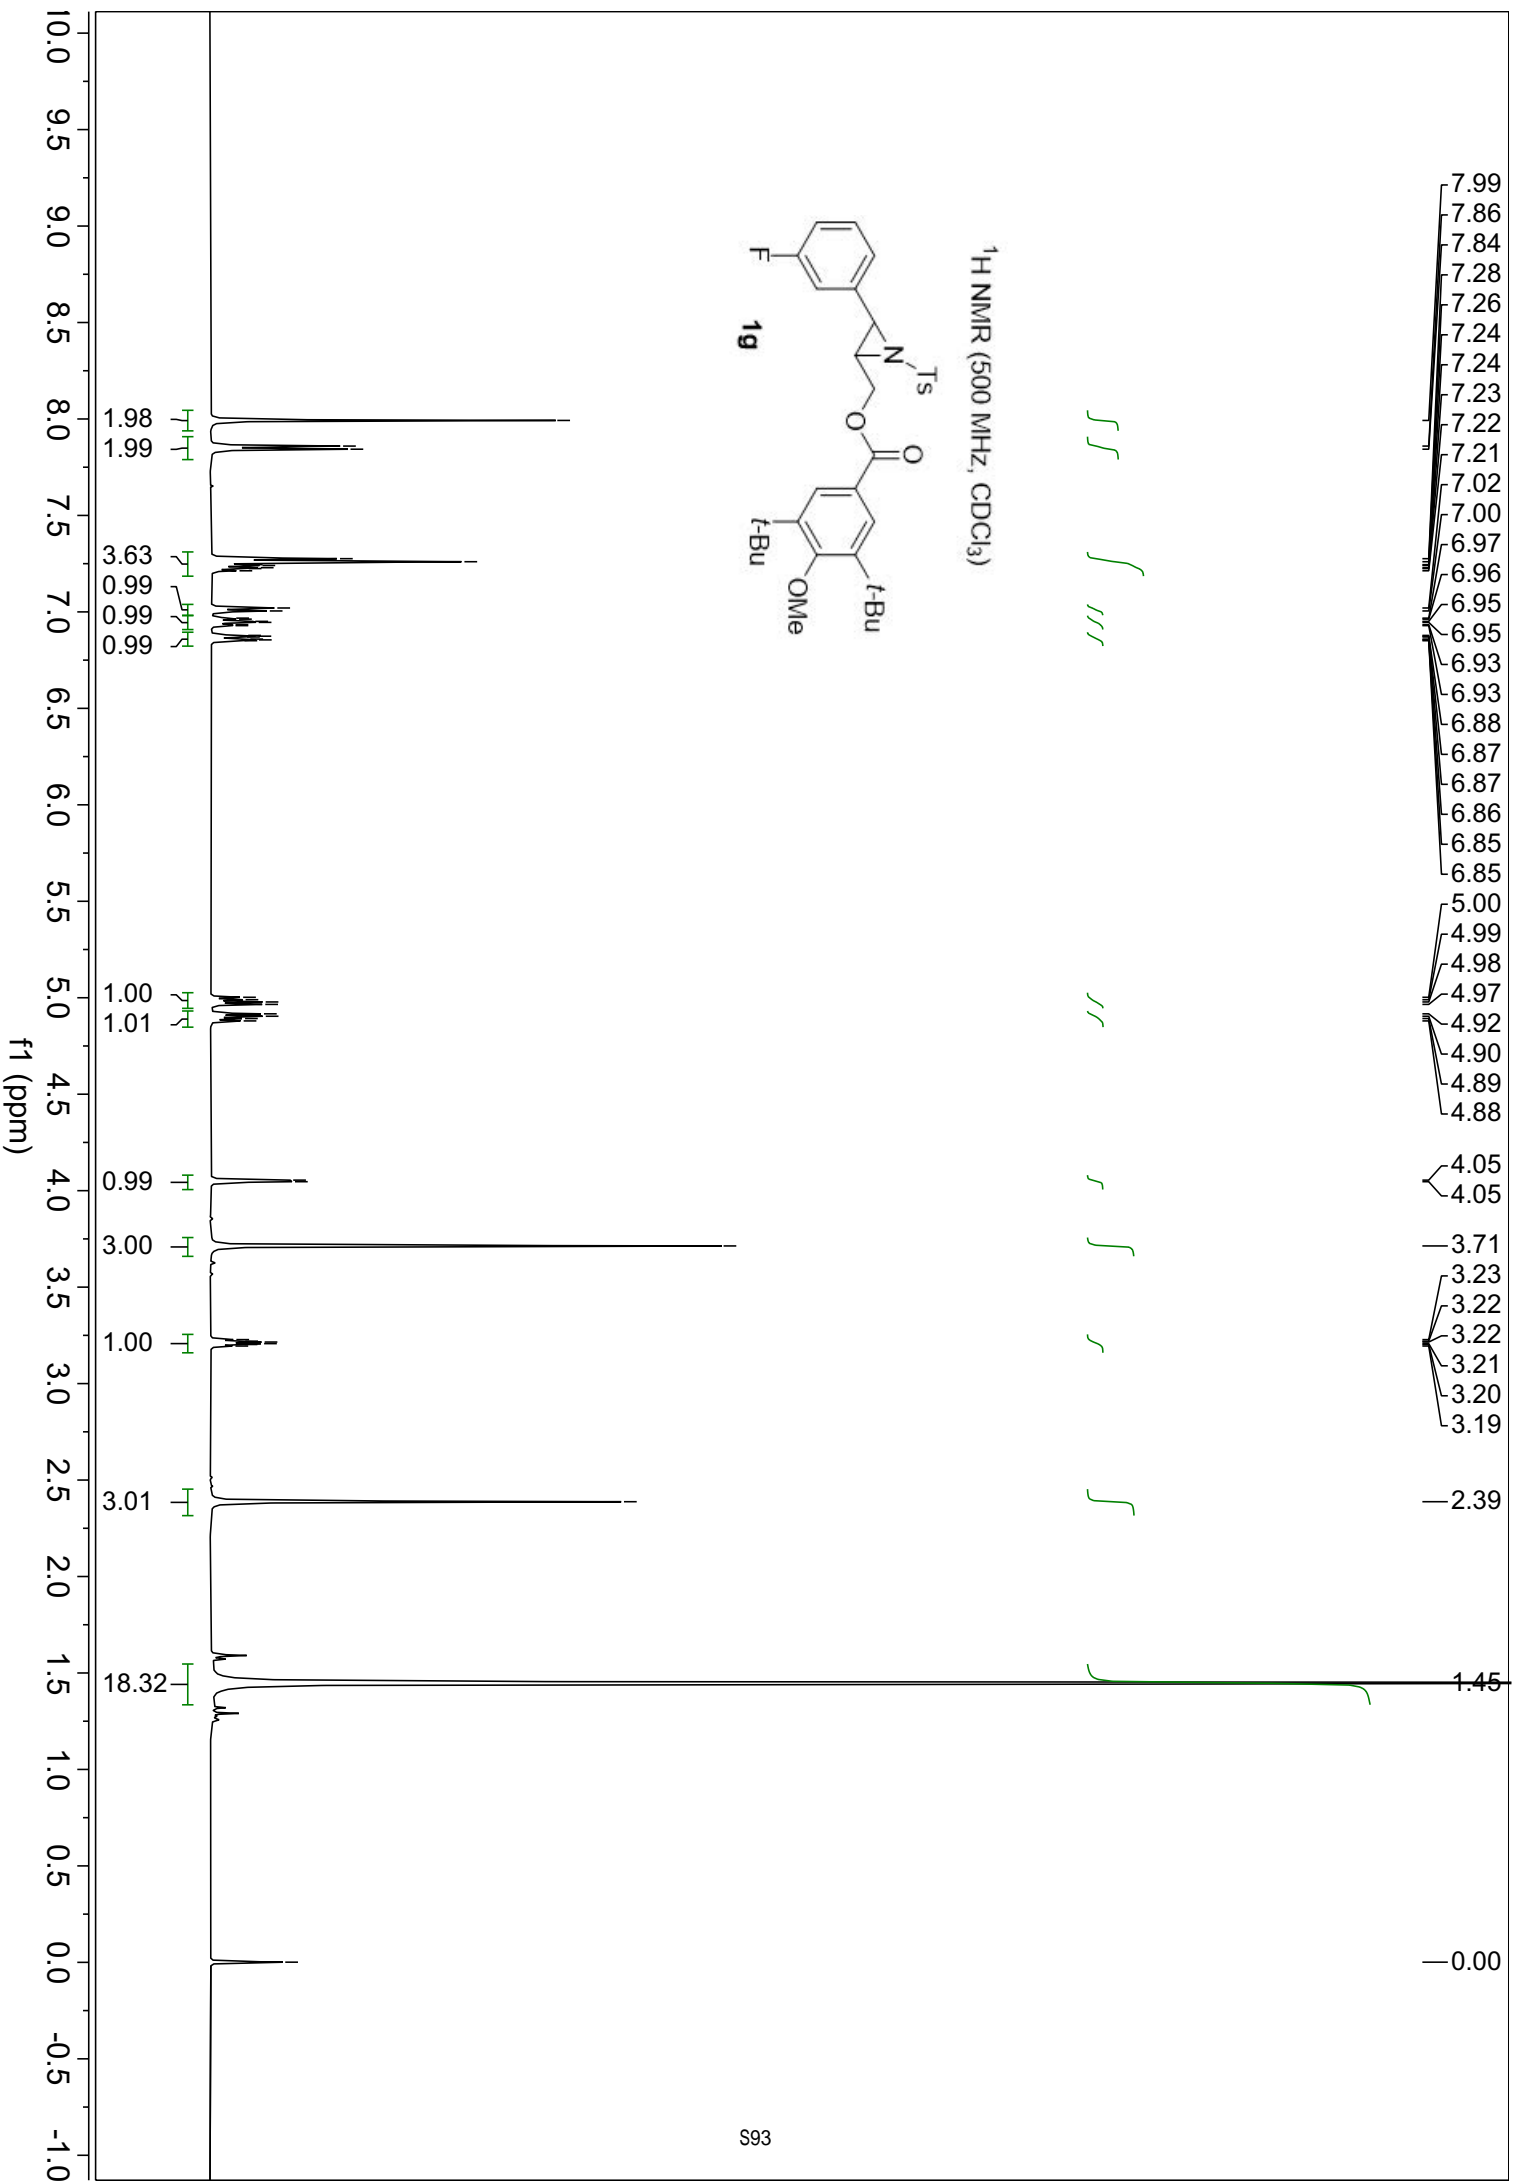

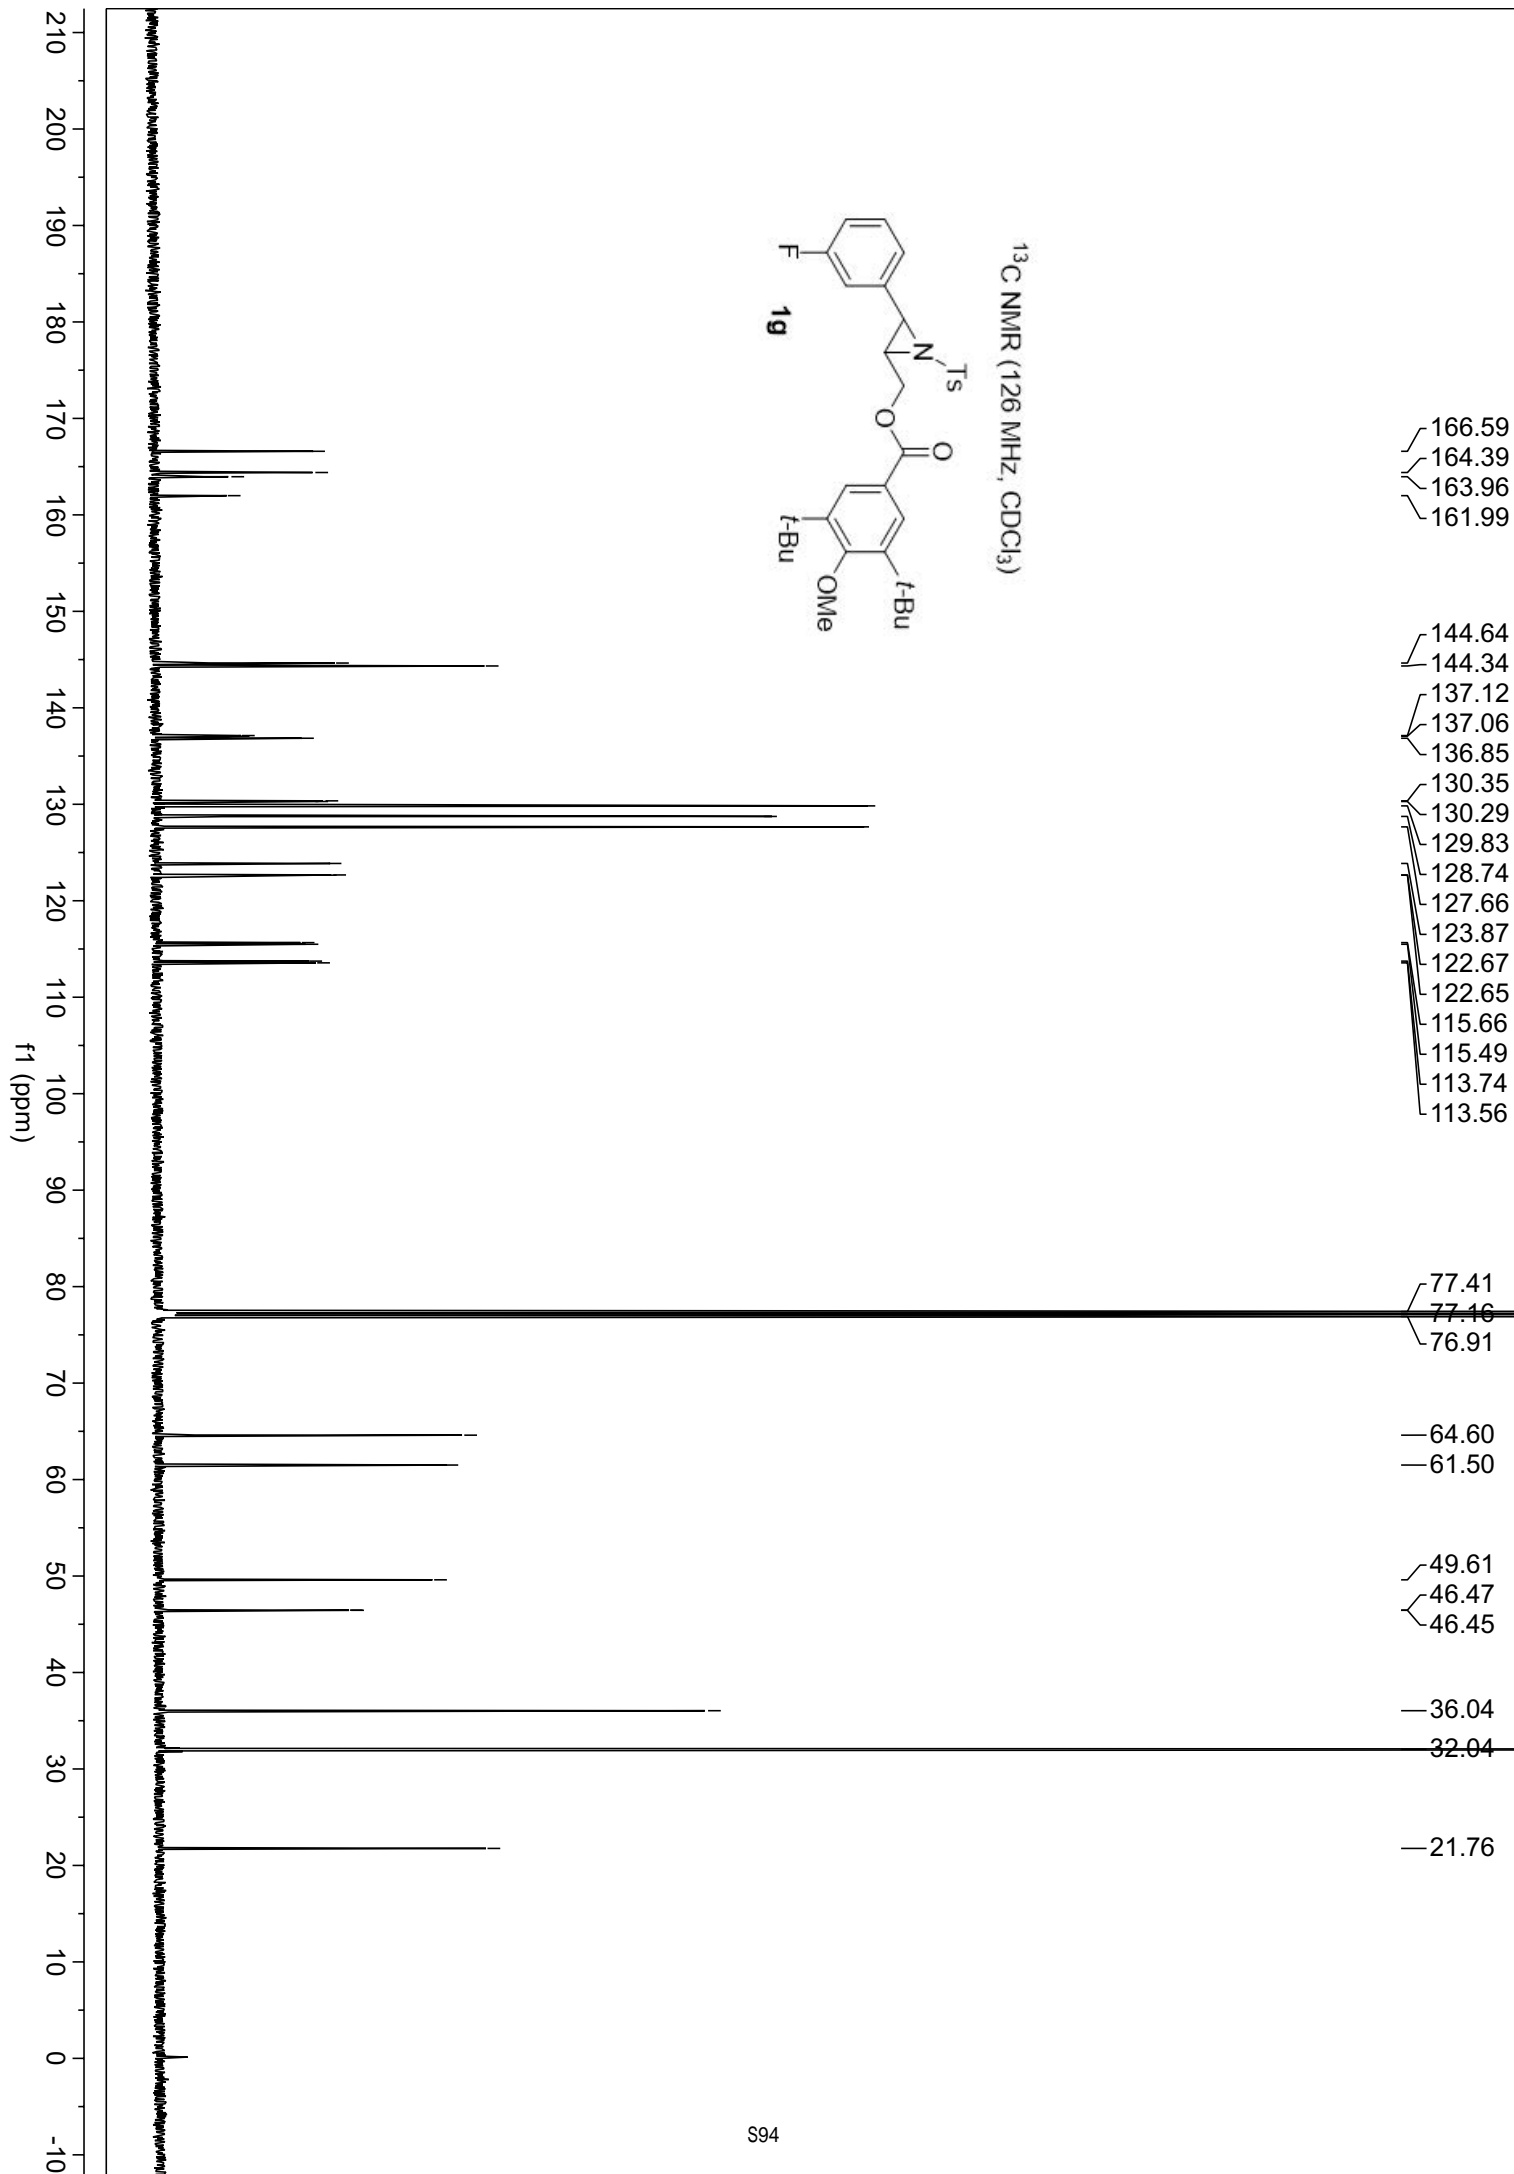

--112.36

<sup>19</sup>F NMR (471 MHz, CDCl<sub>3</sub>)

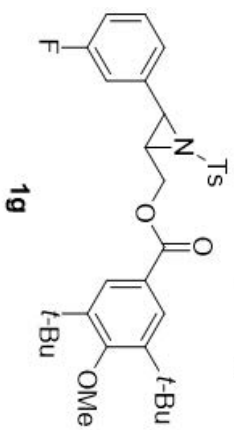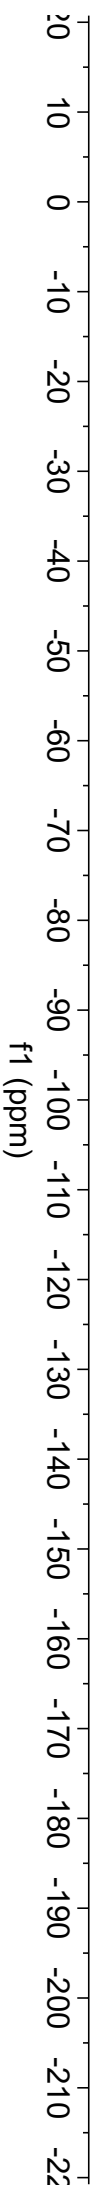

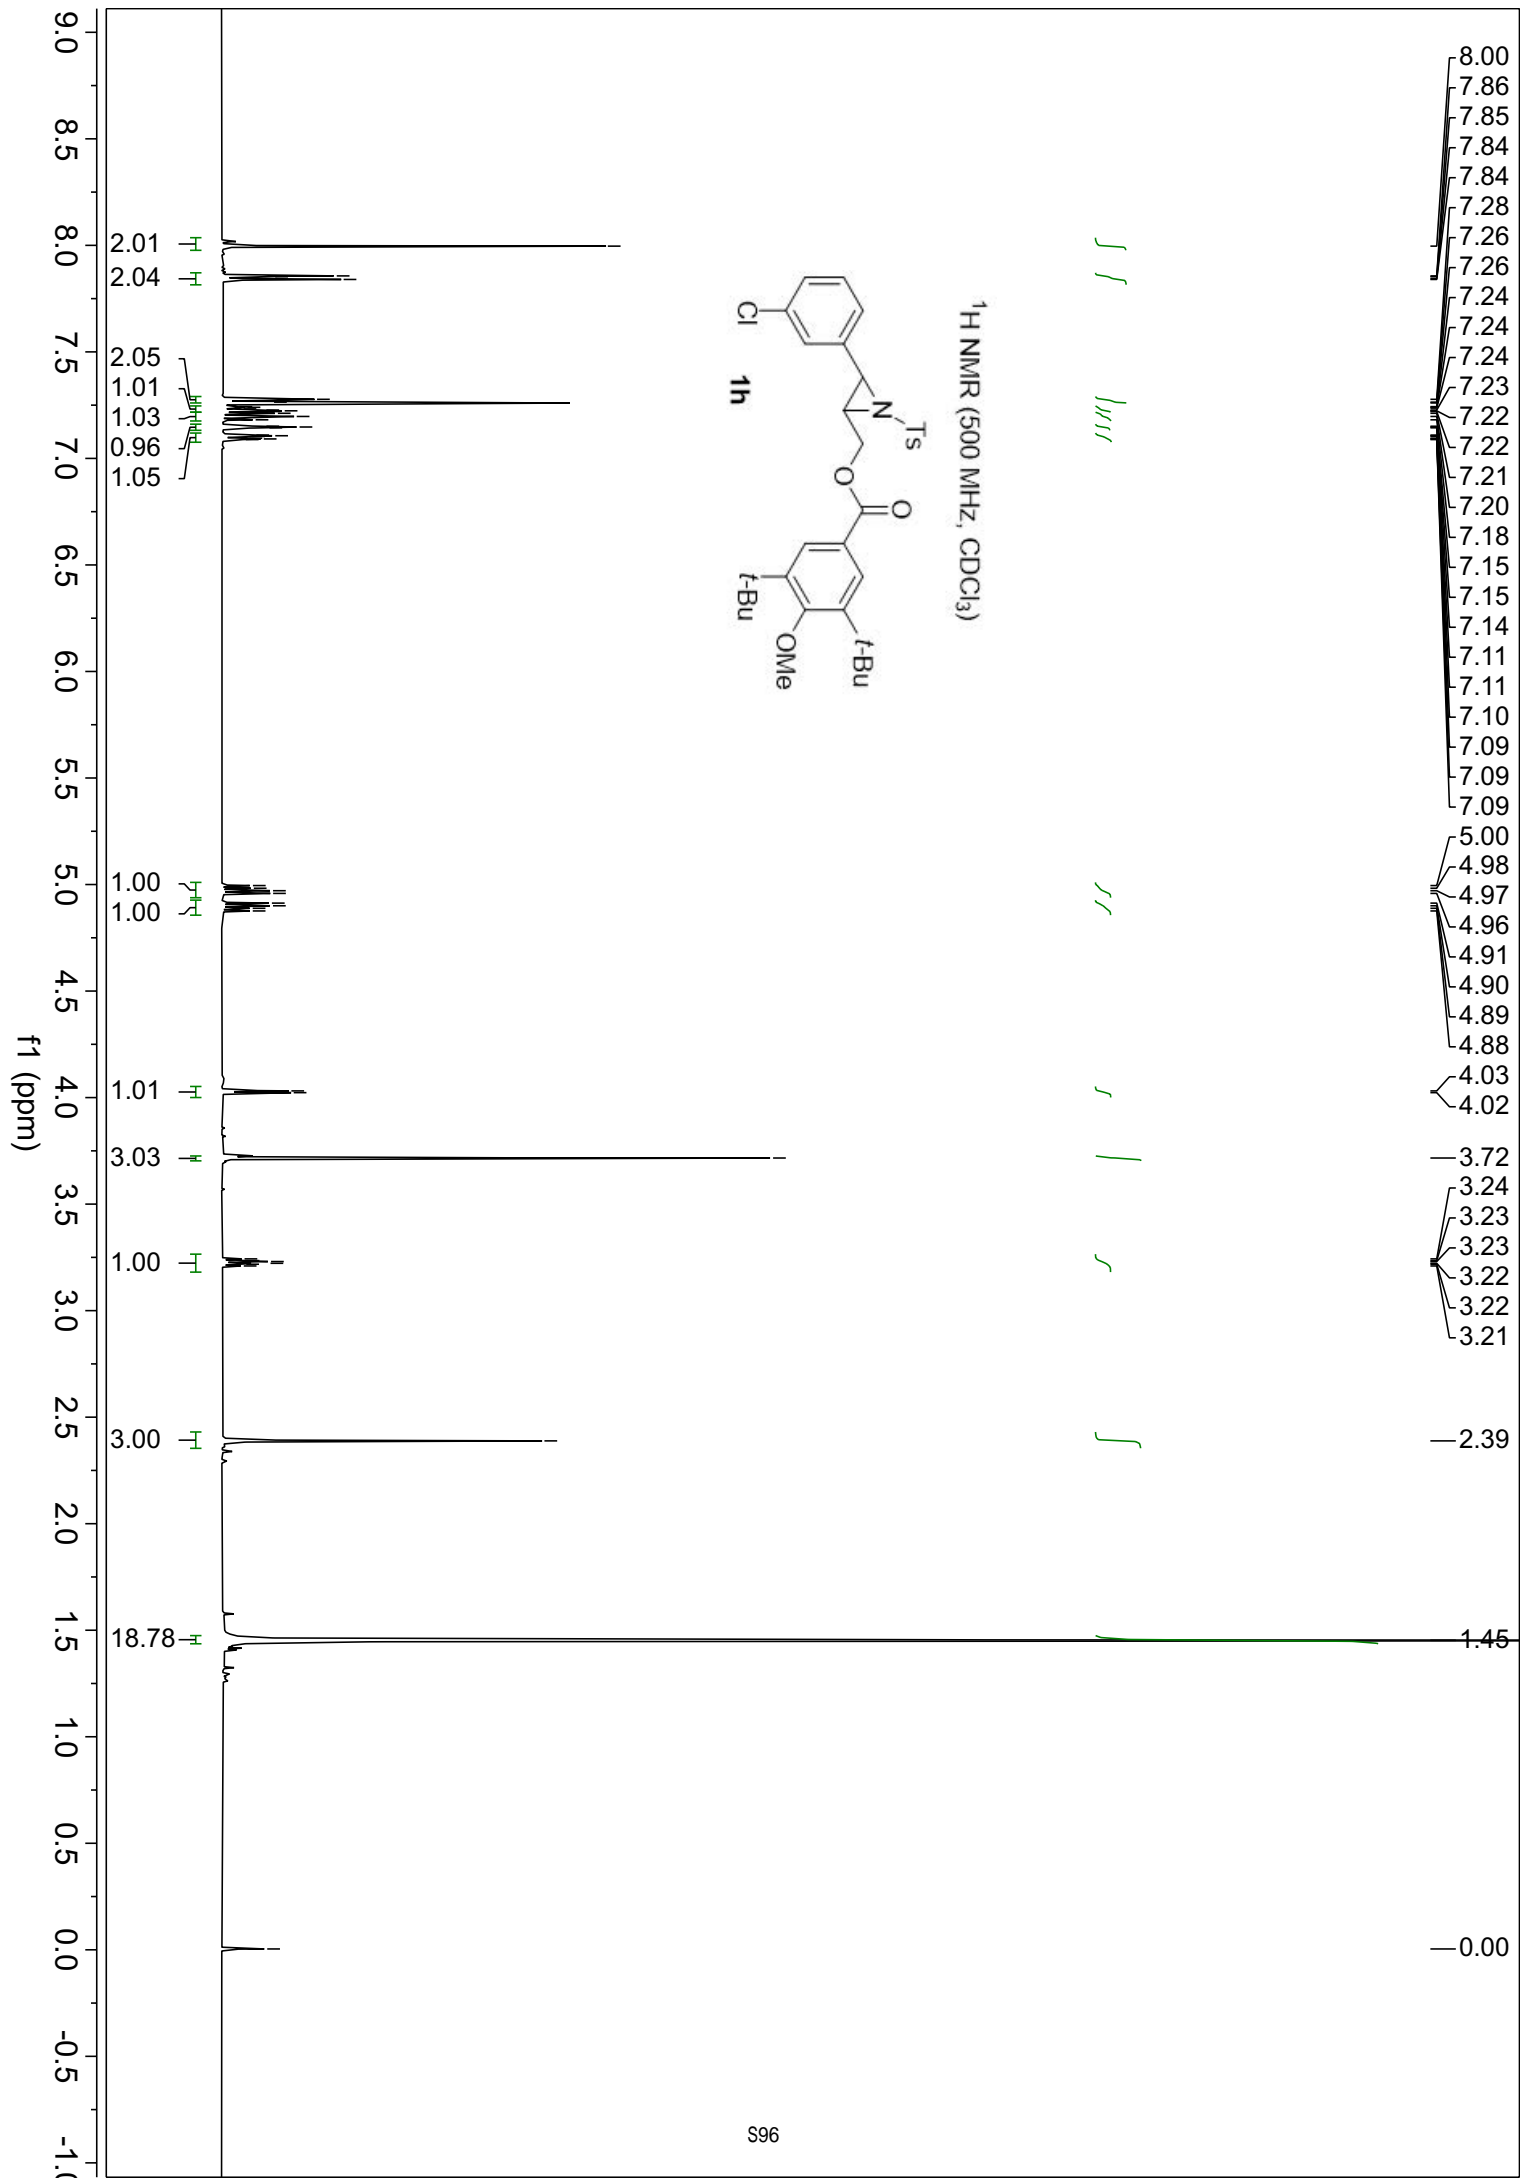



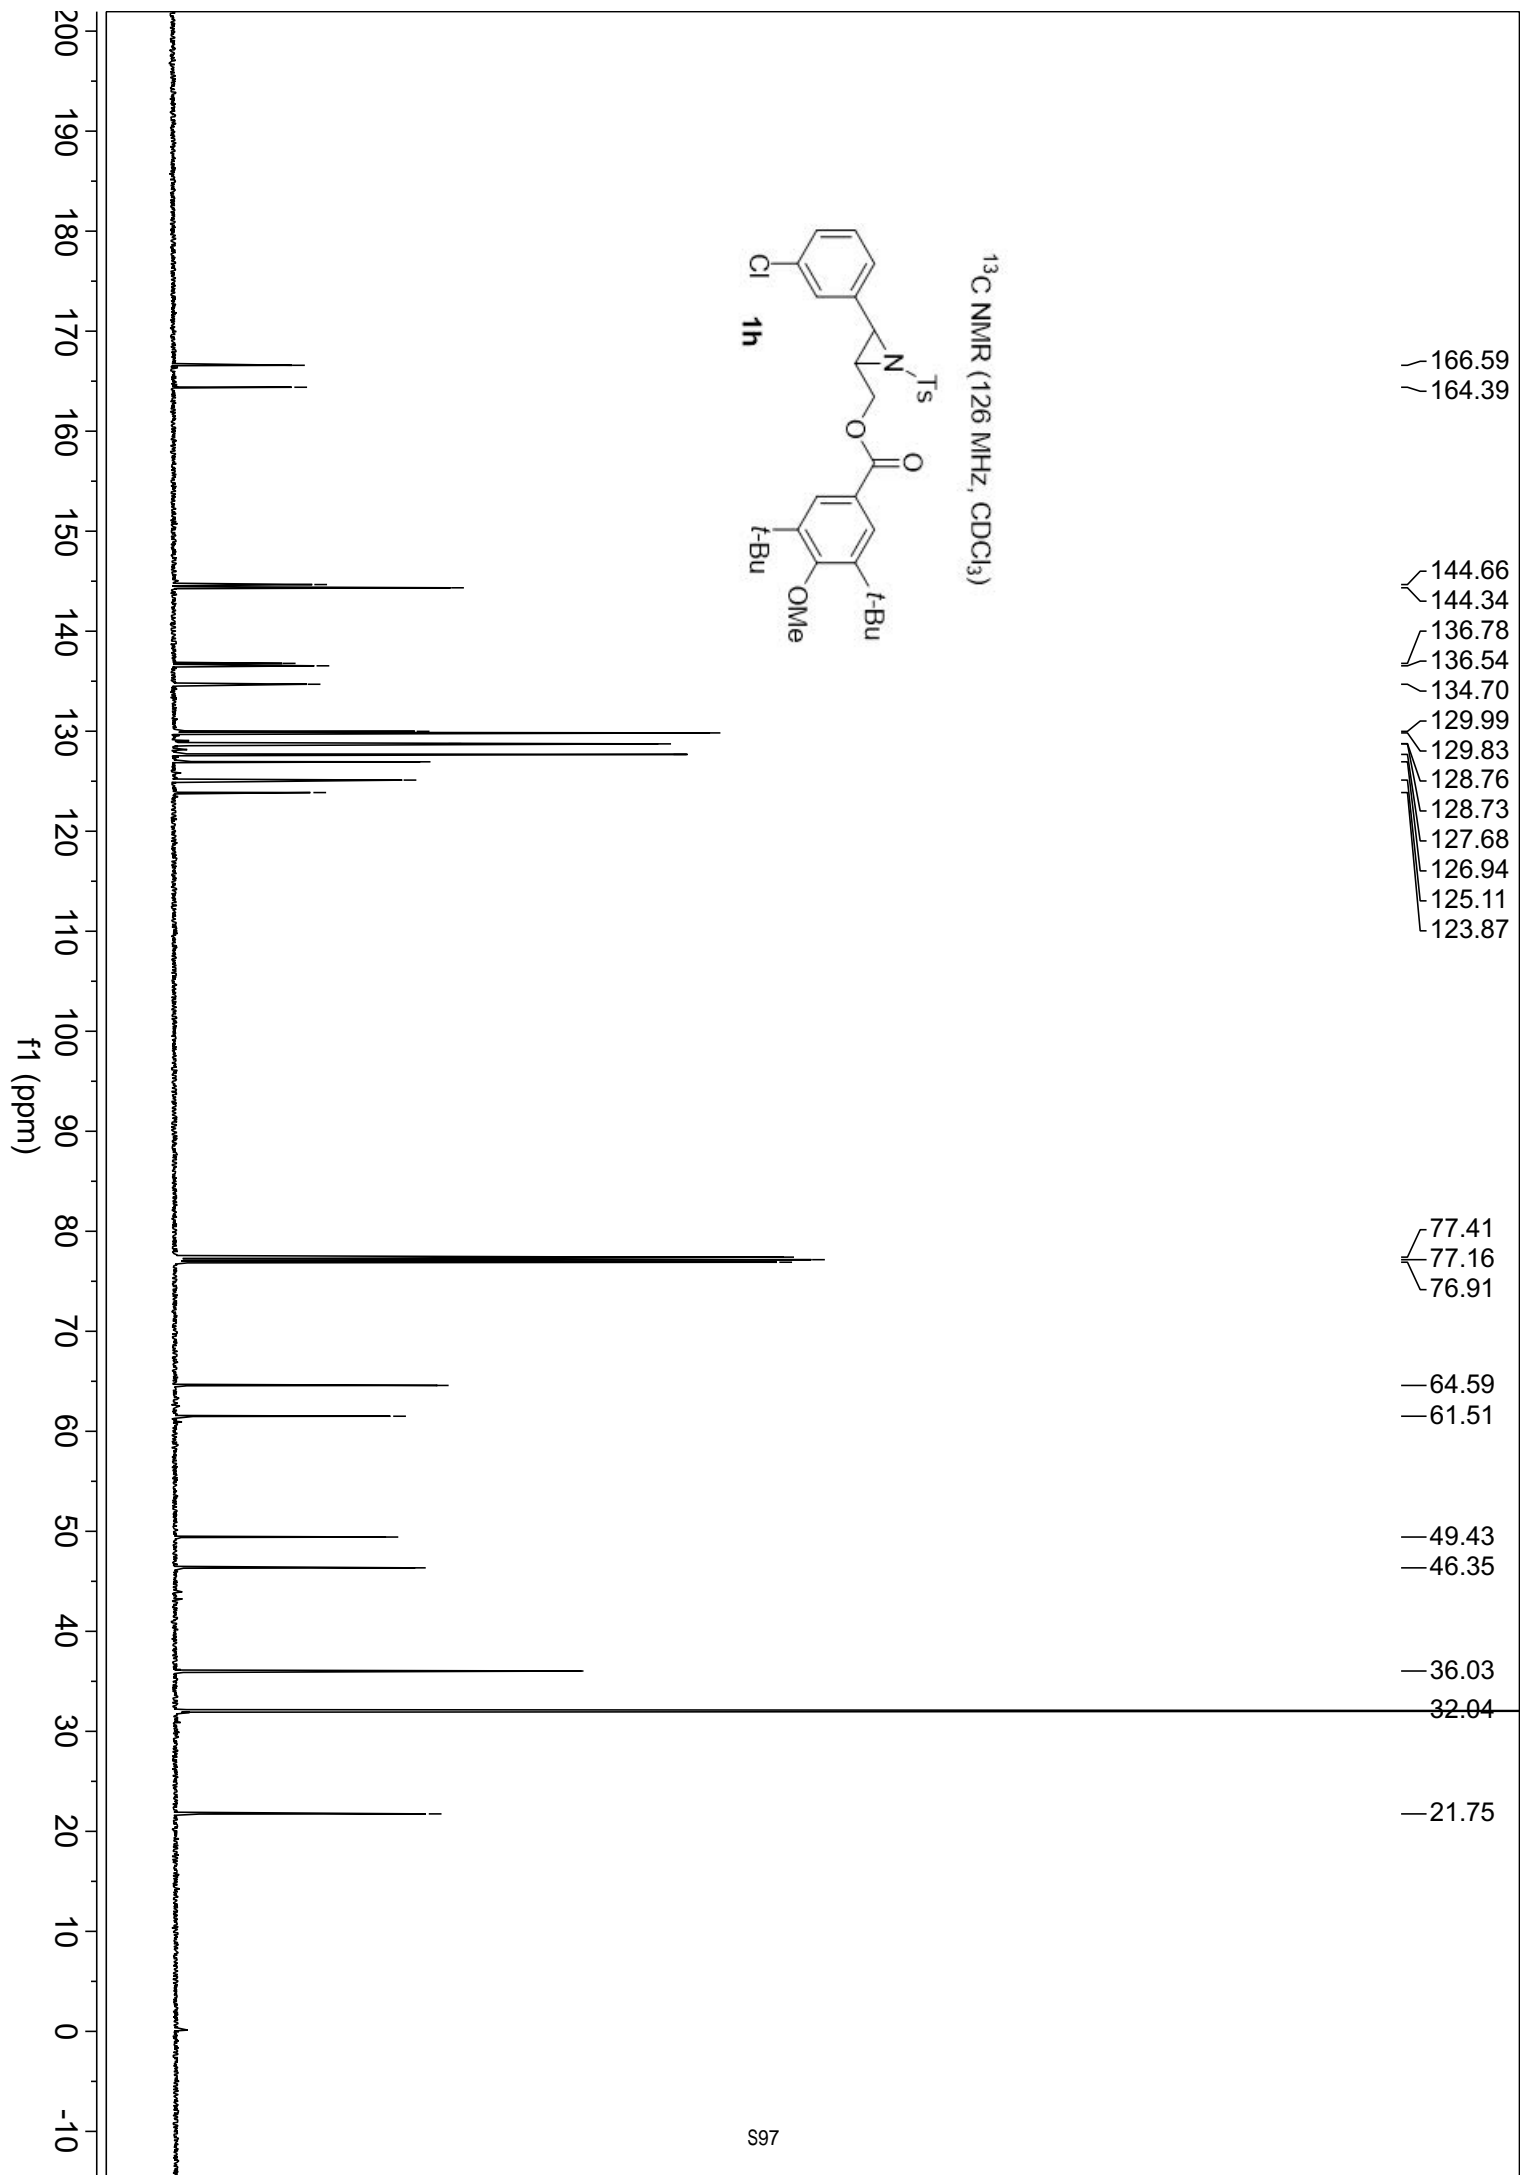

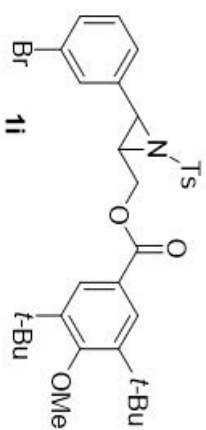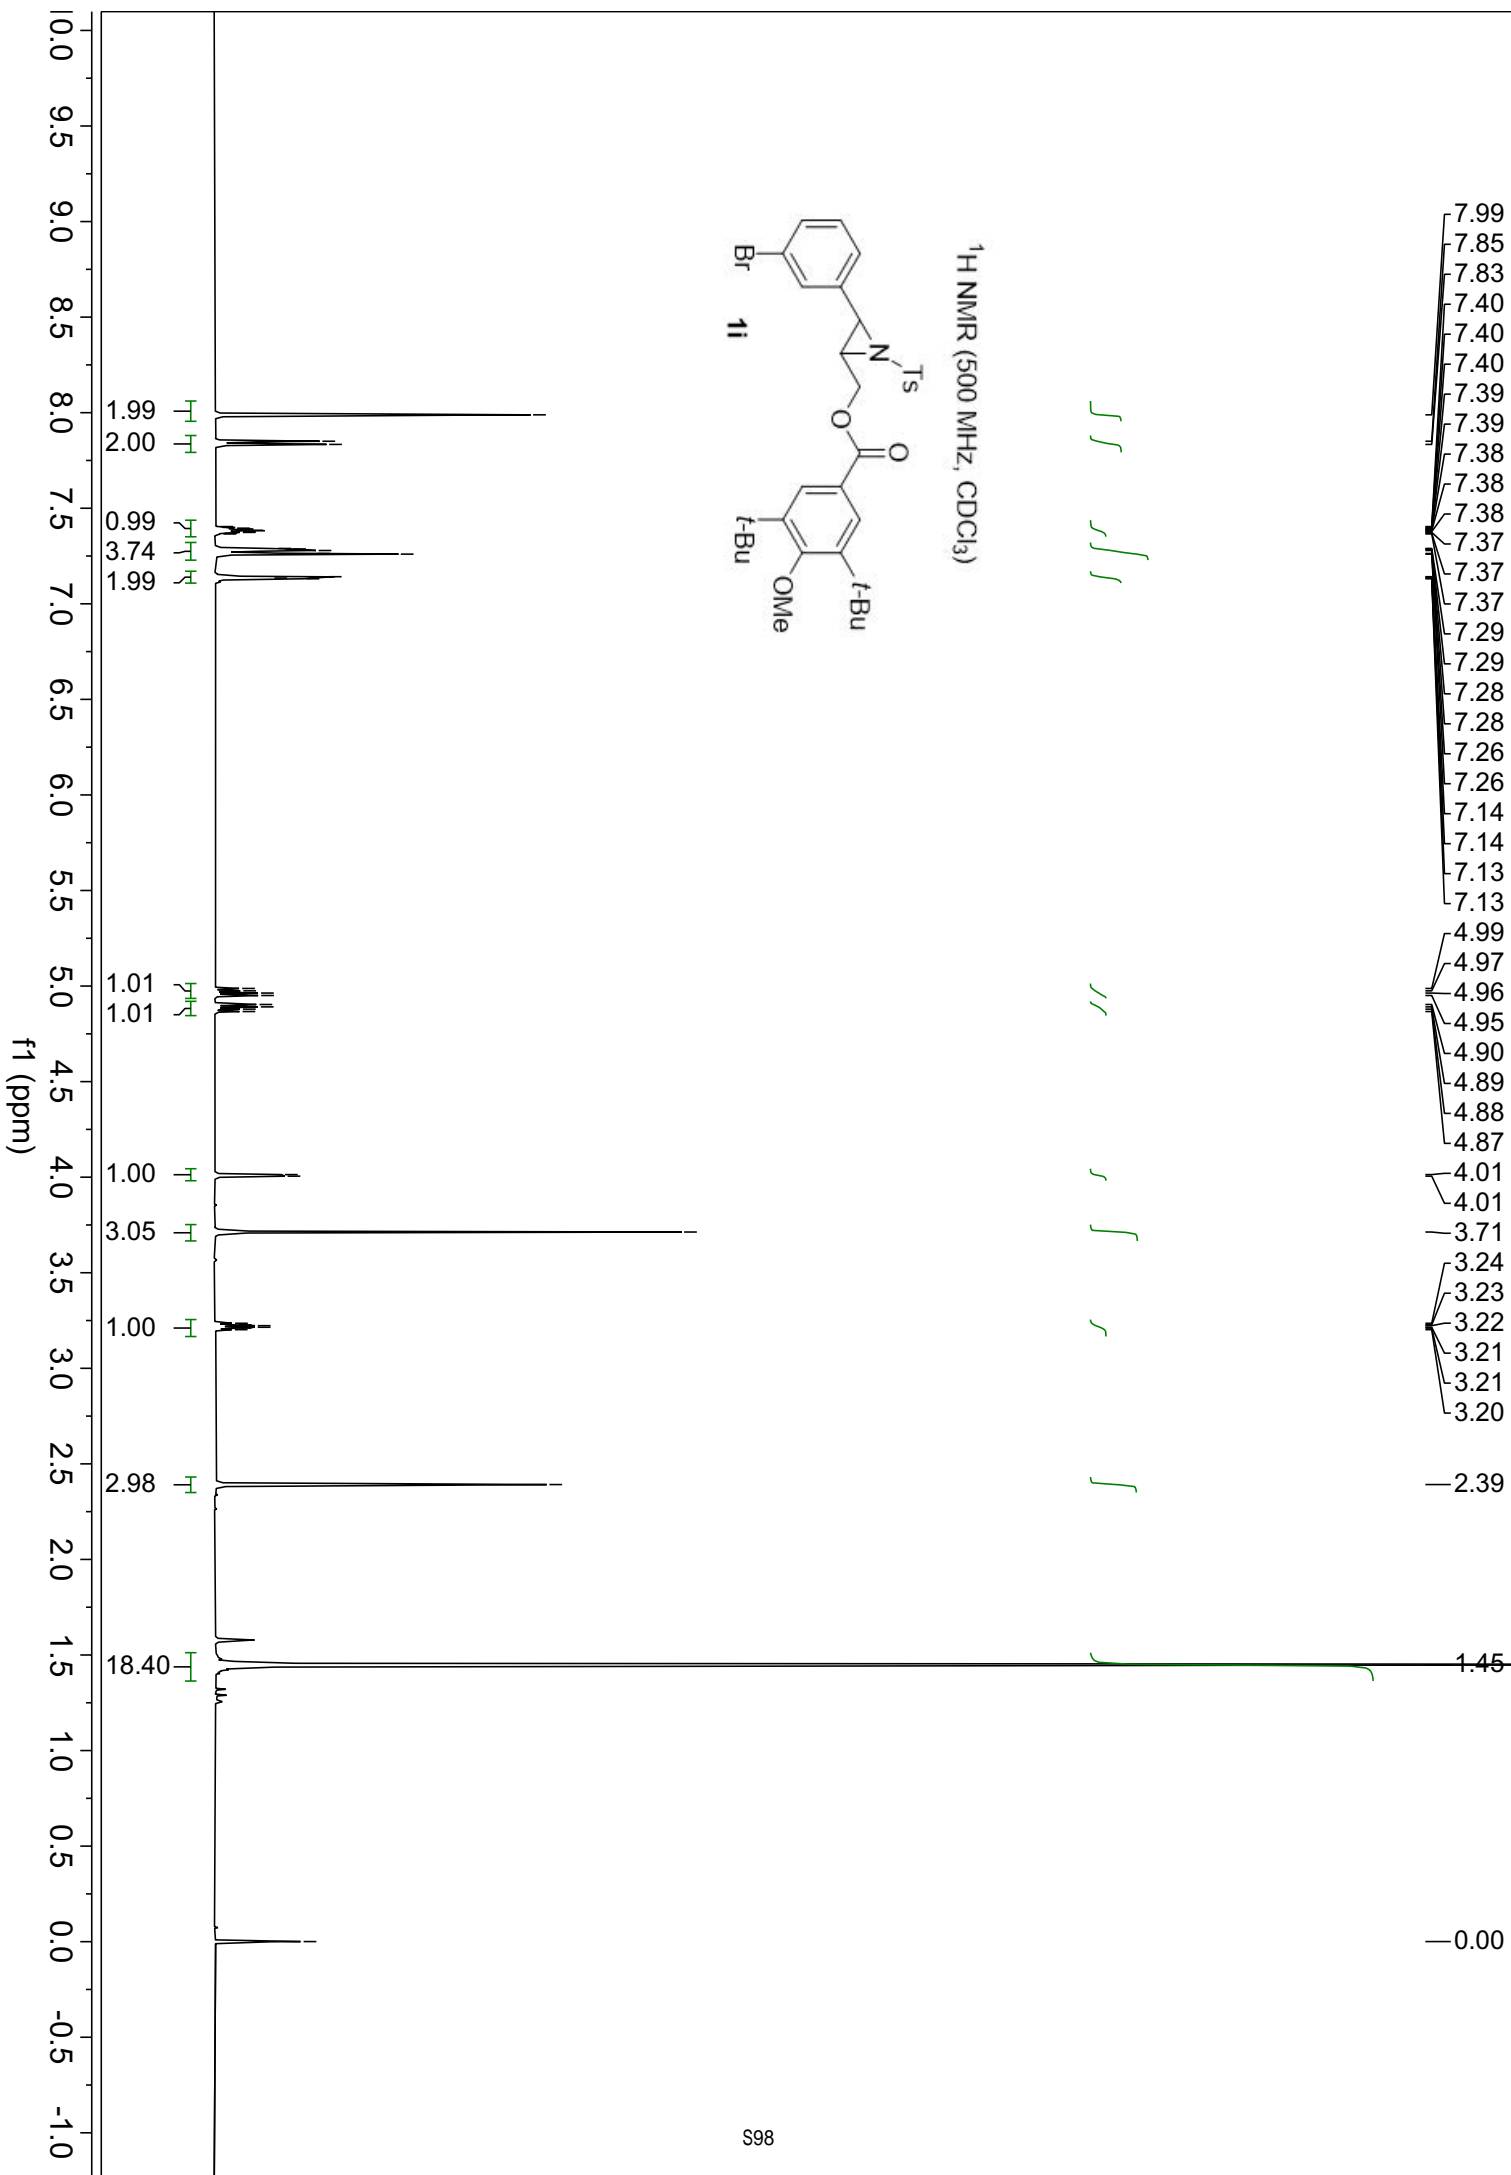

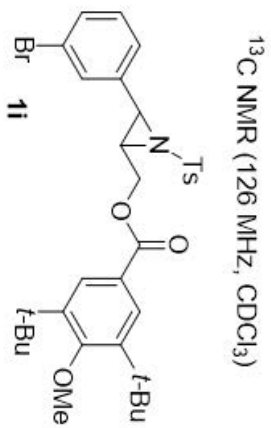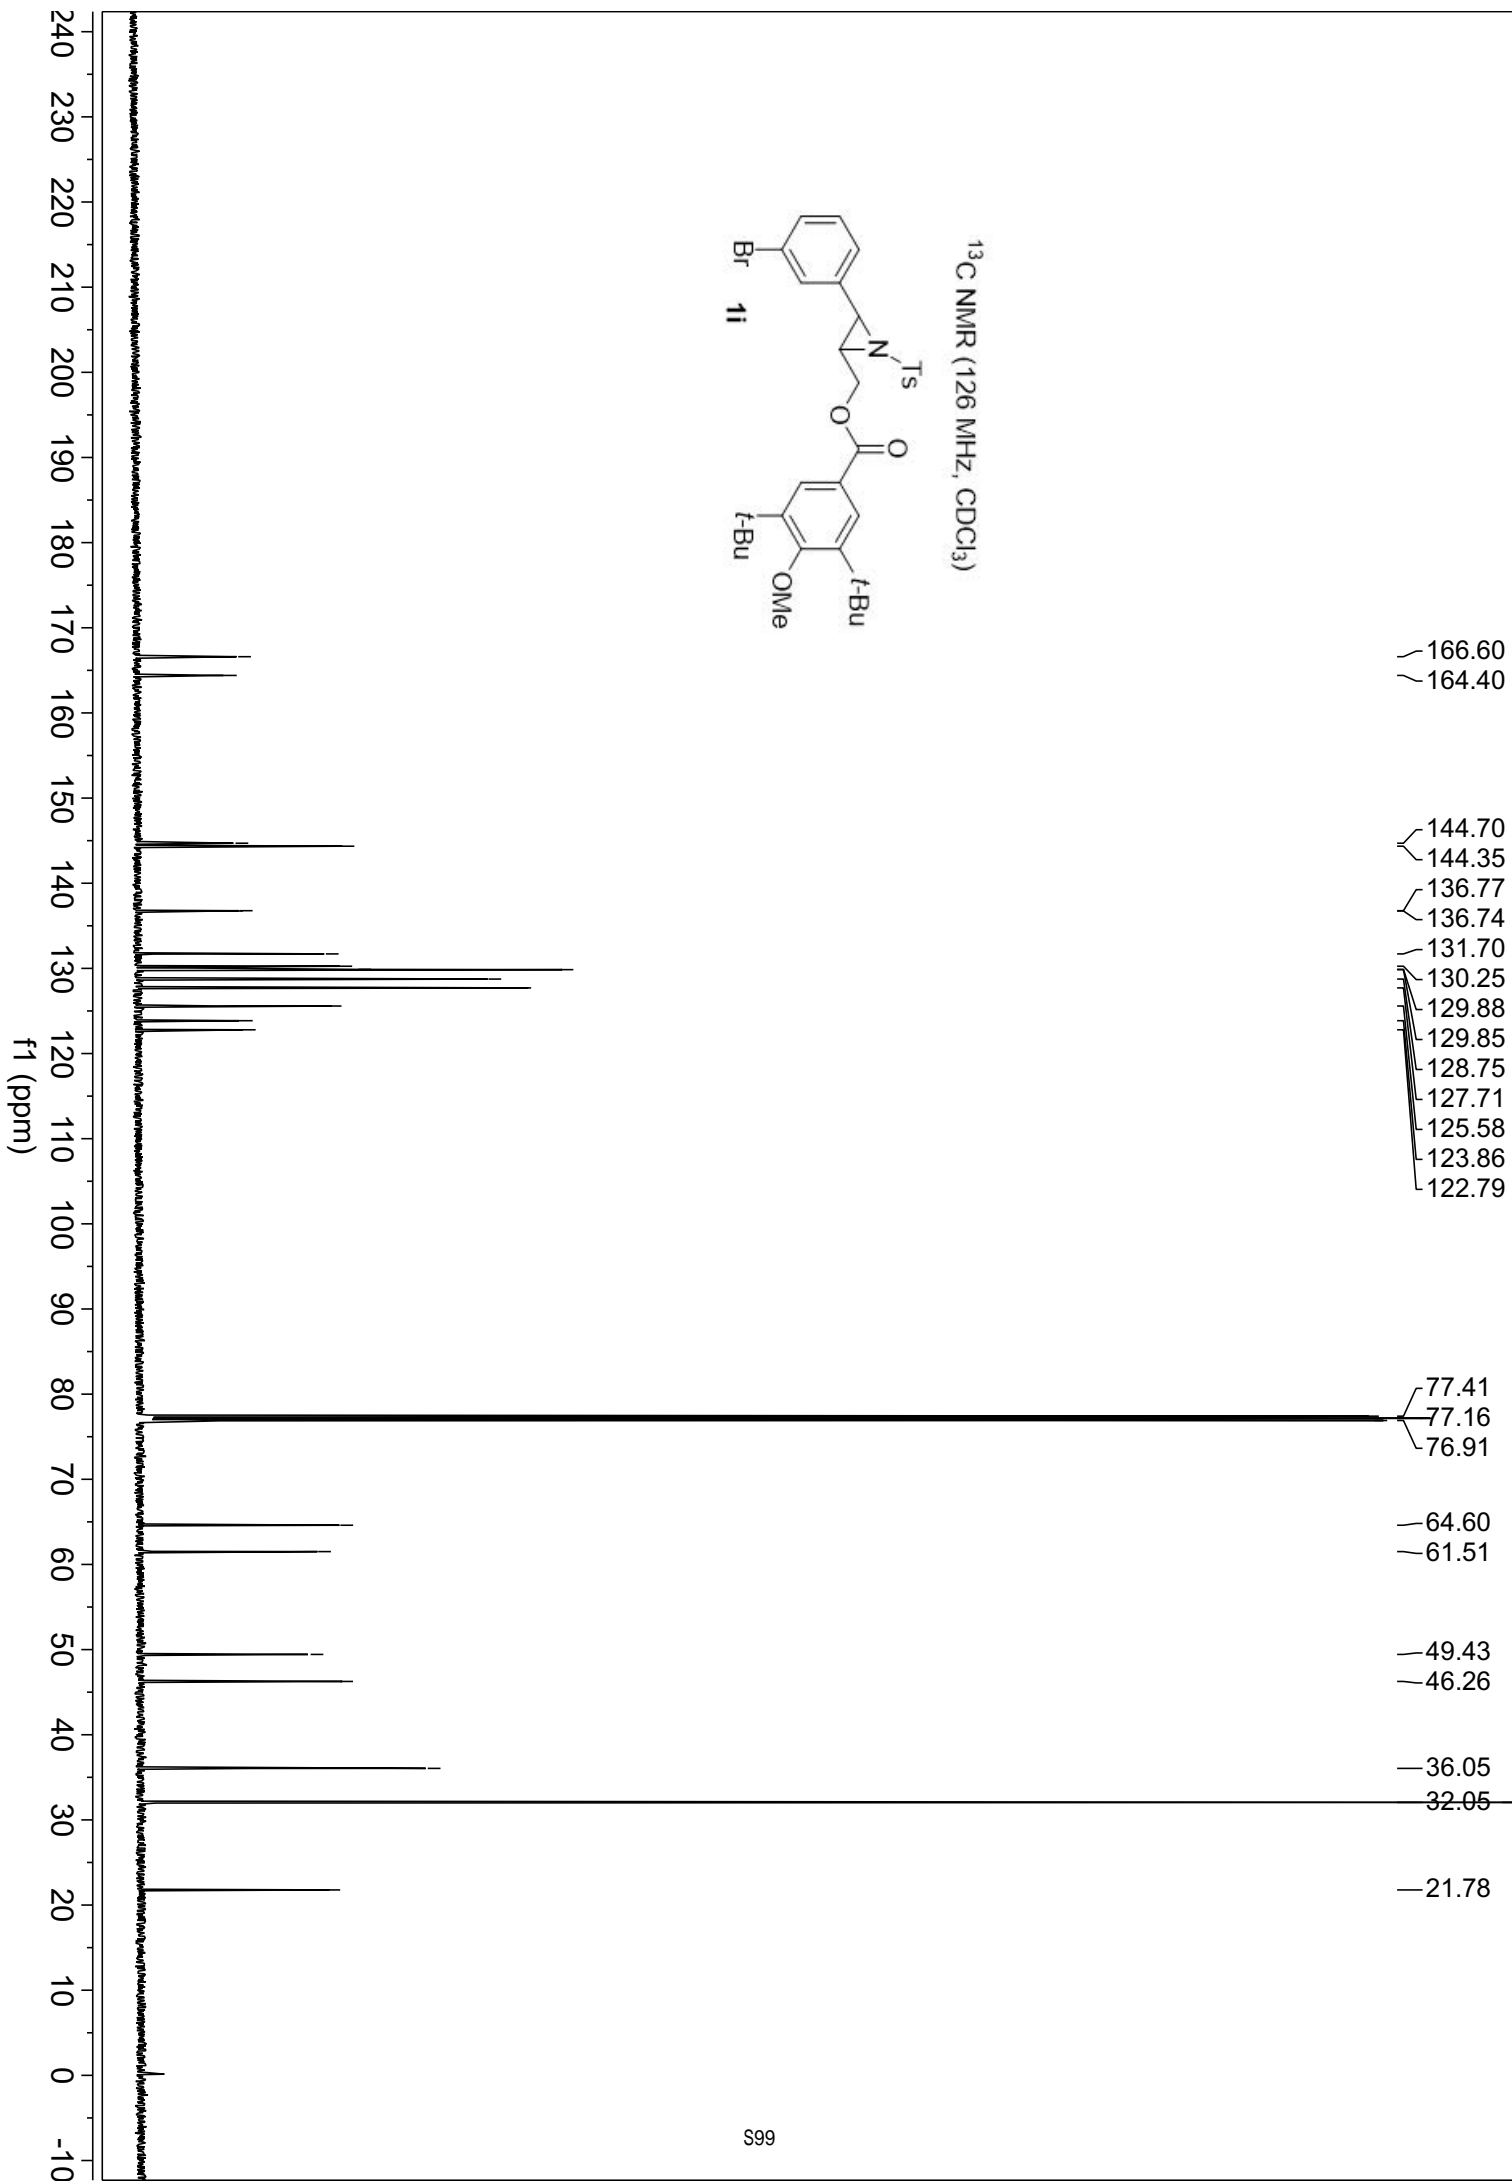

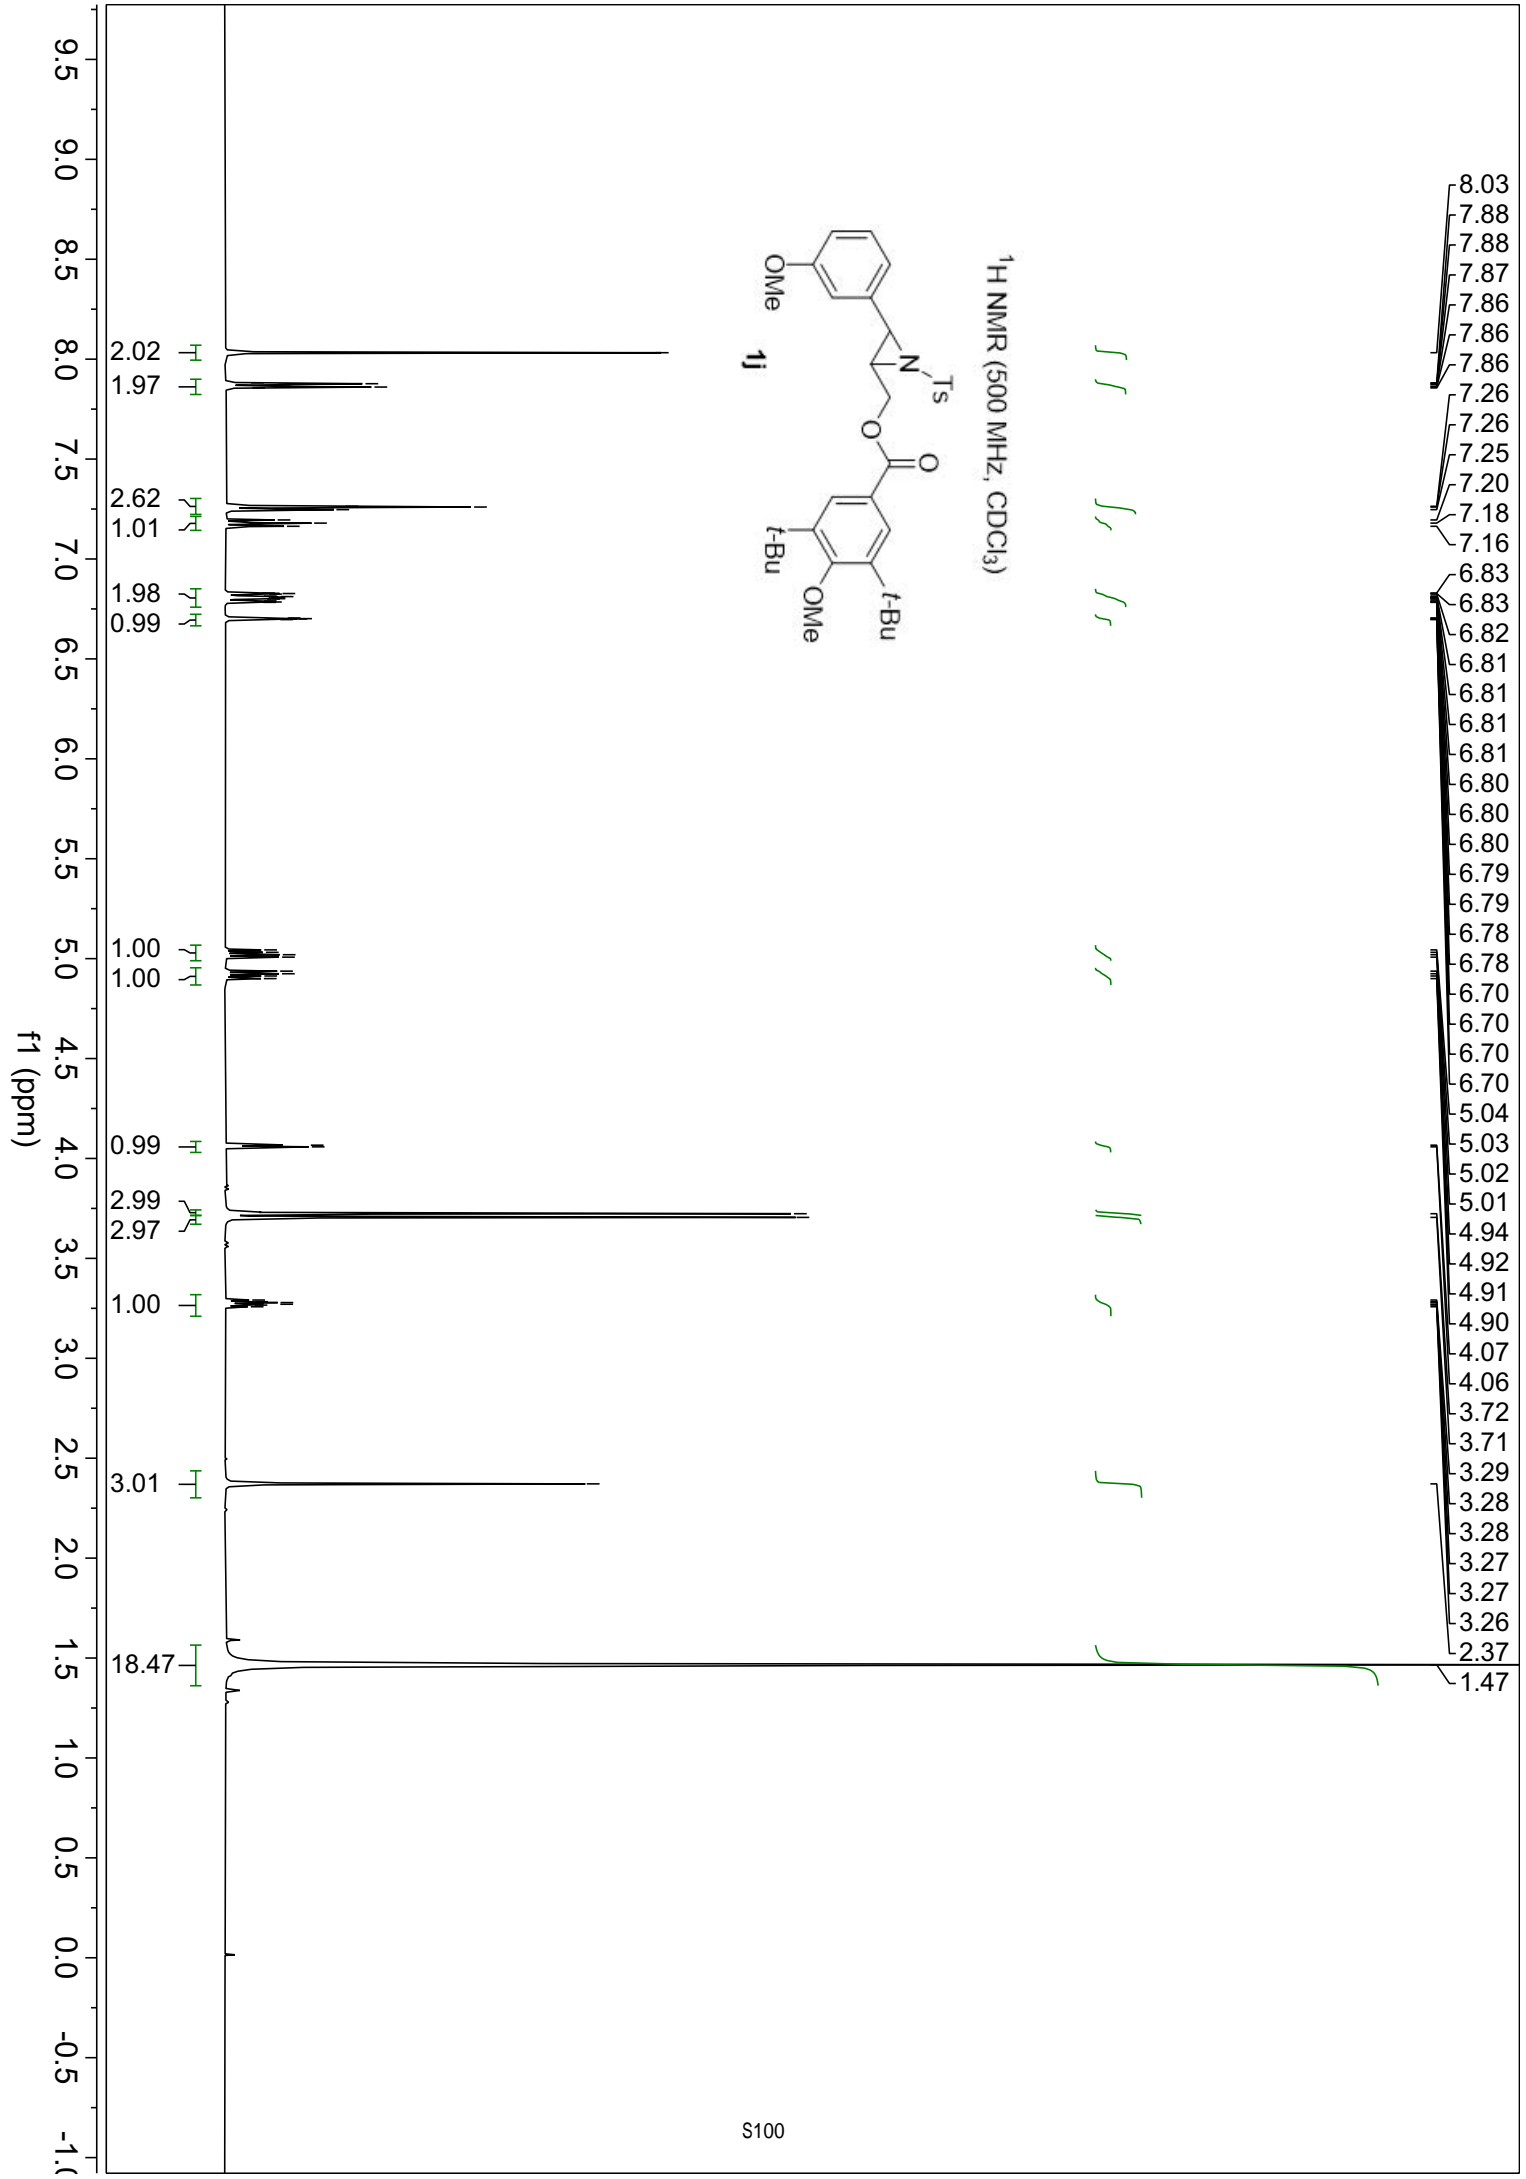

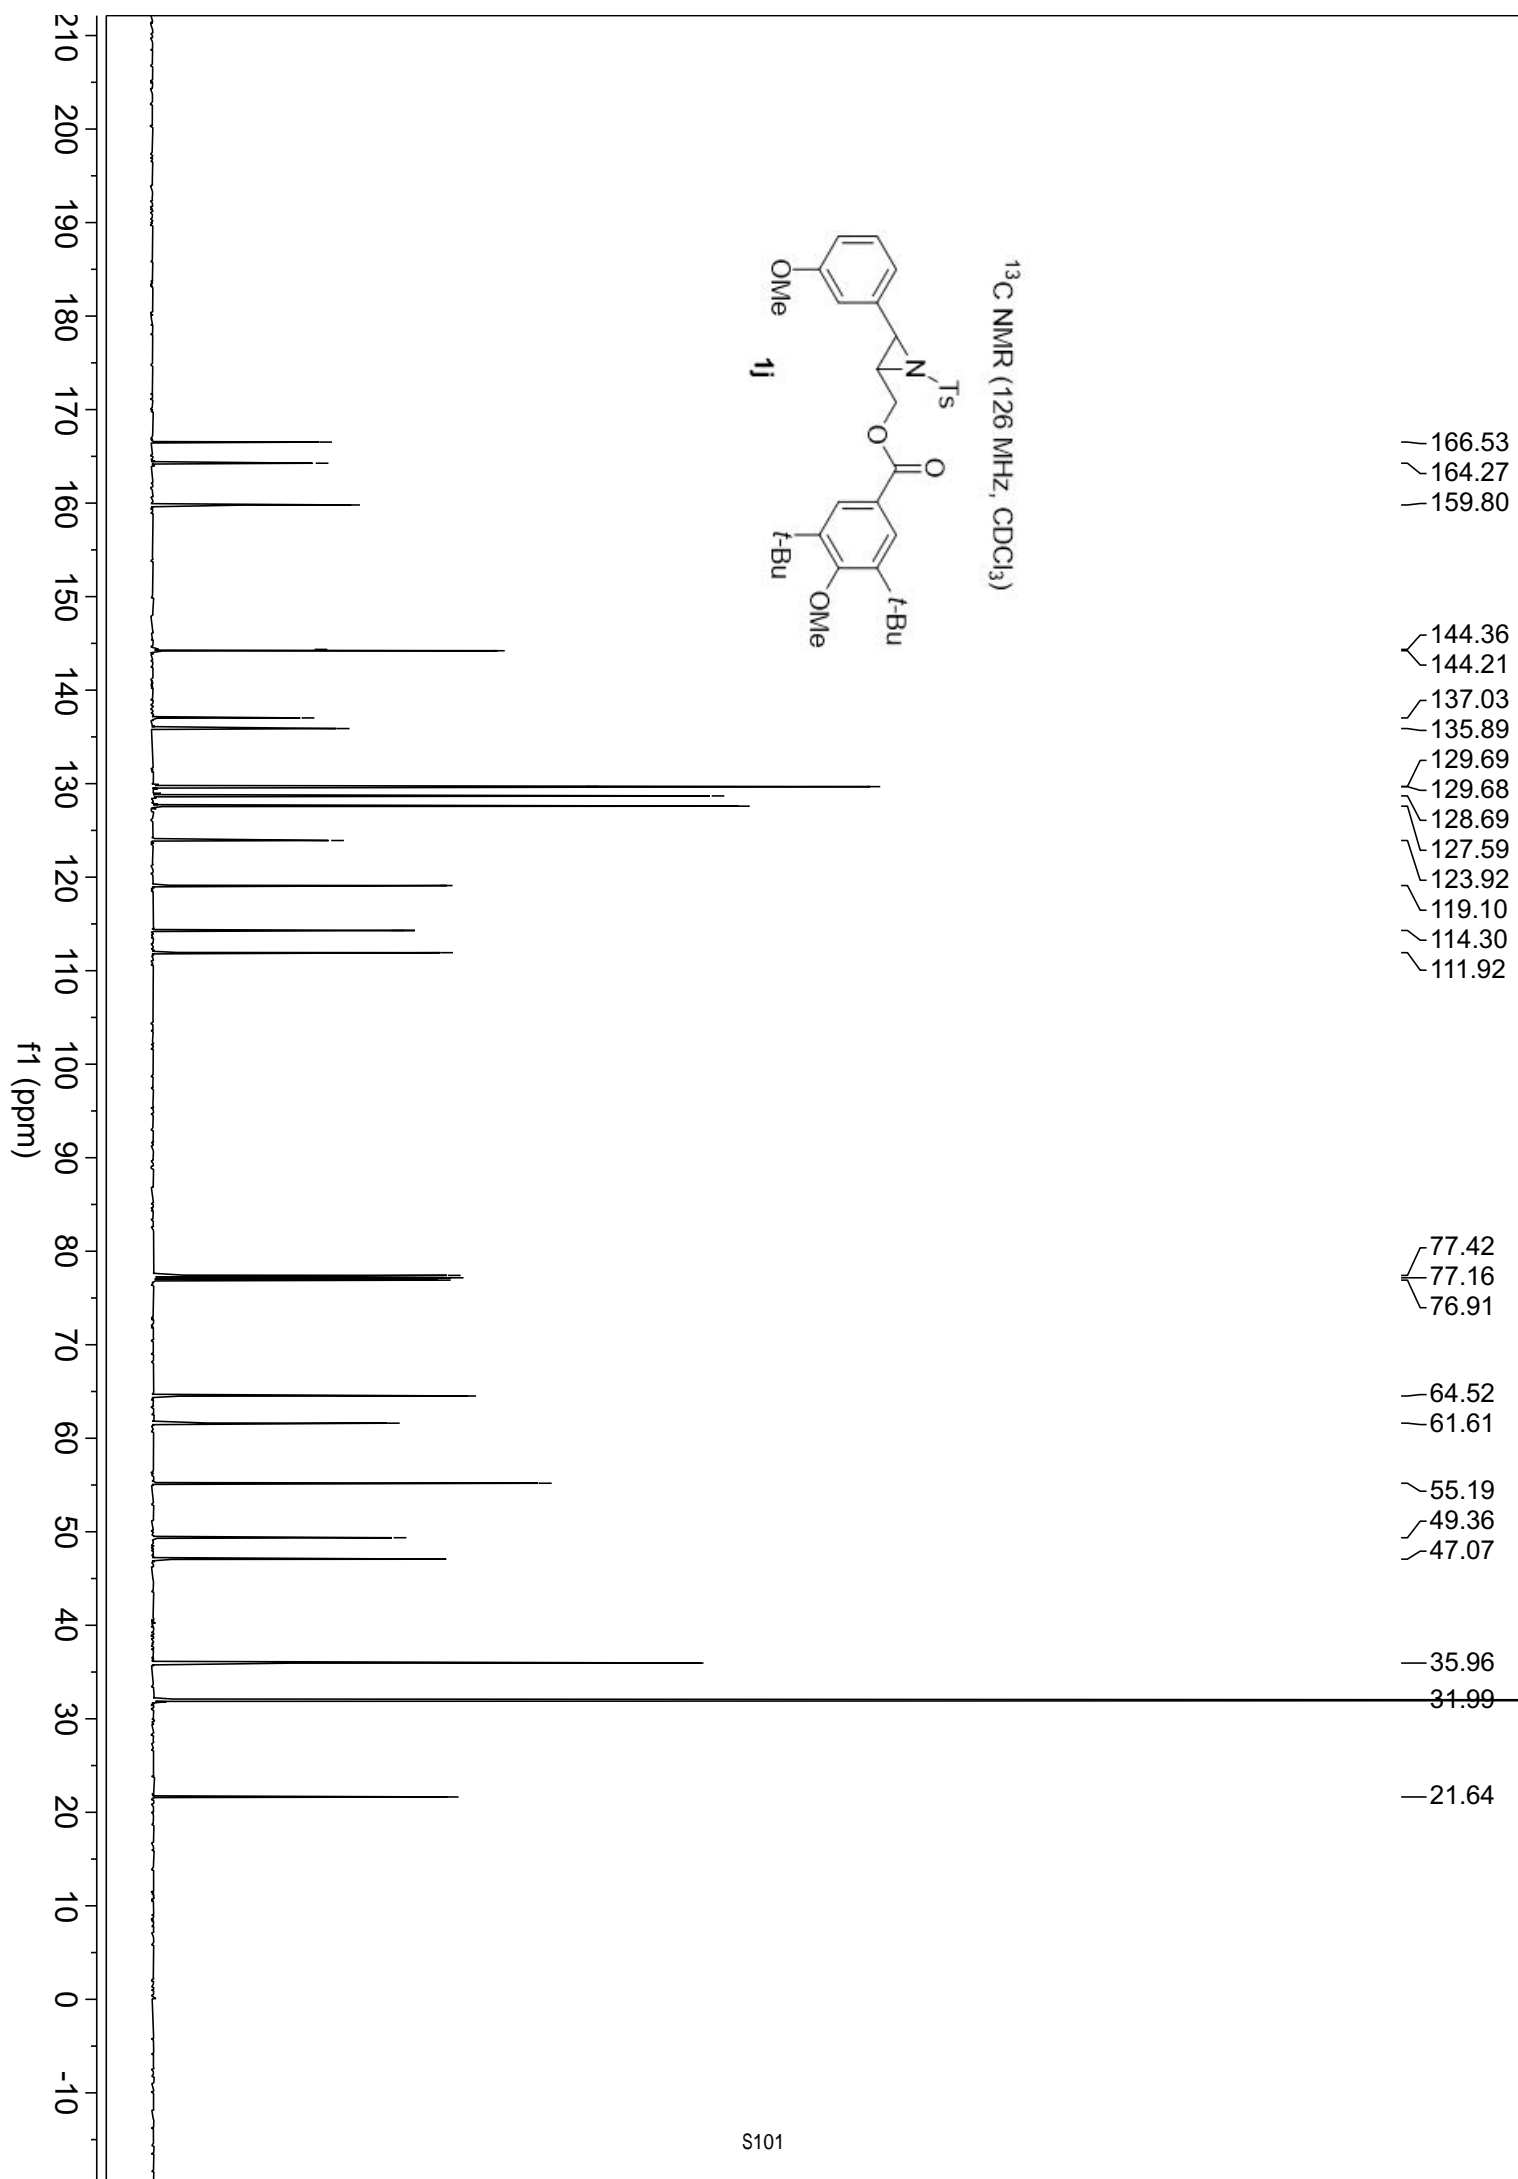

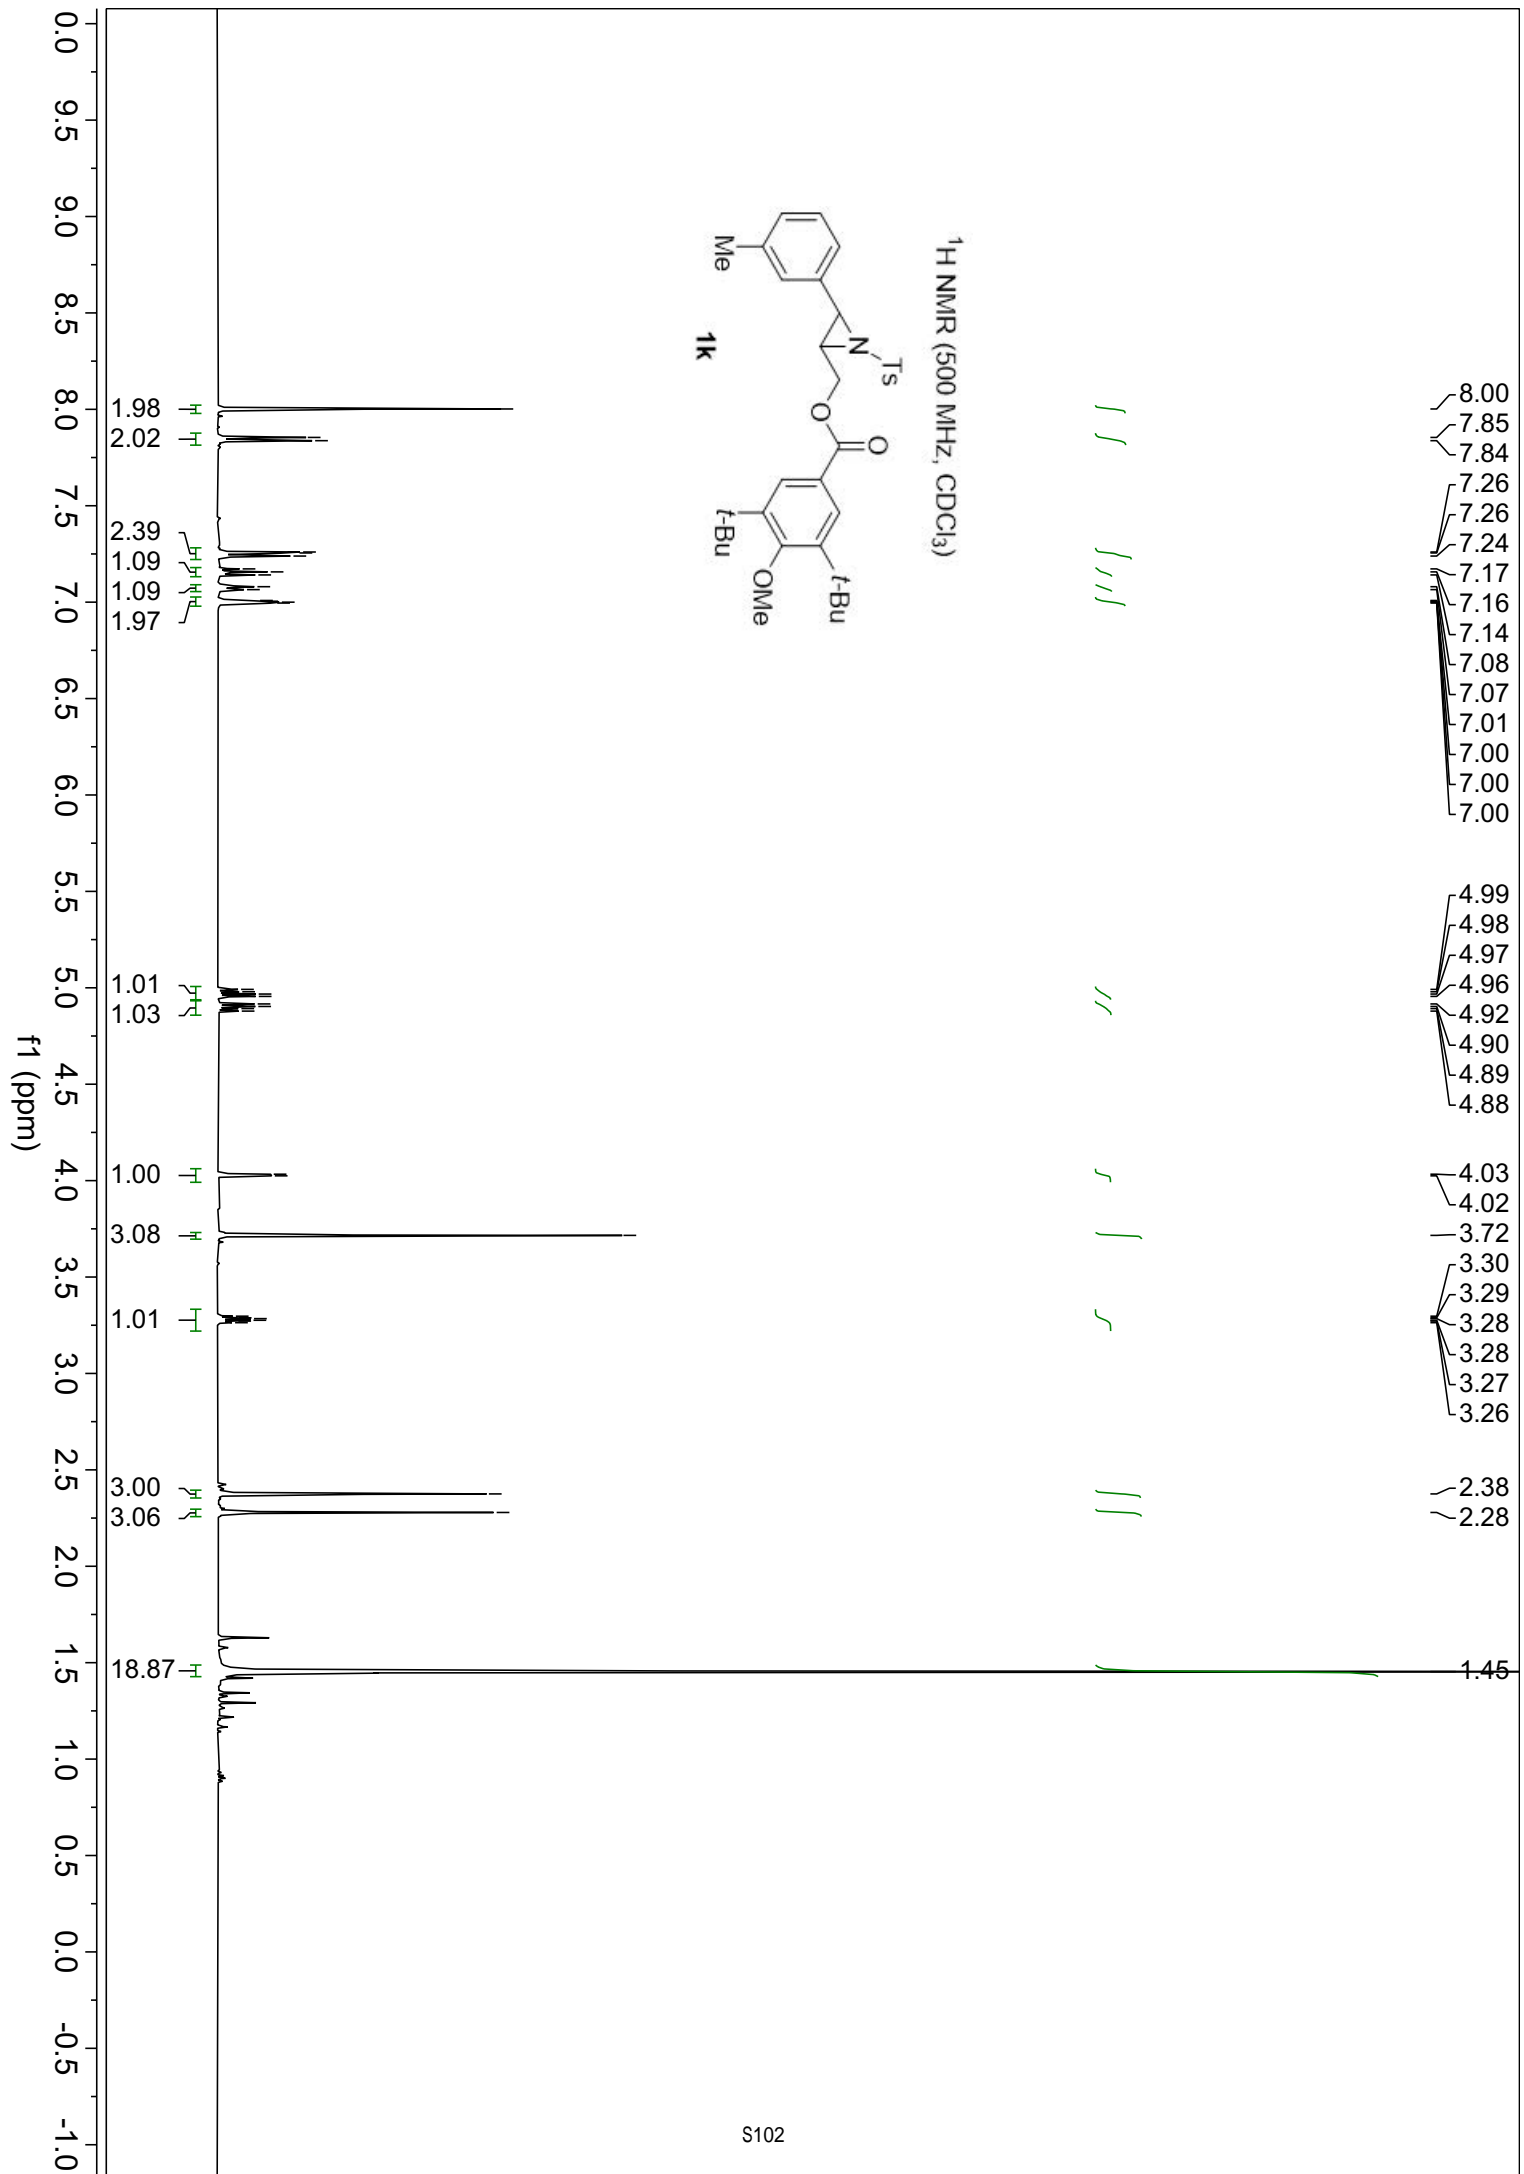

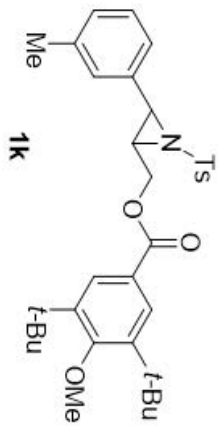

<sup>13</sup>C NMR (126 MHz, CDCl<sub>3</sub>)

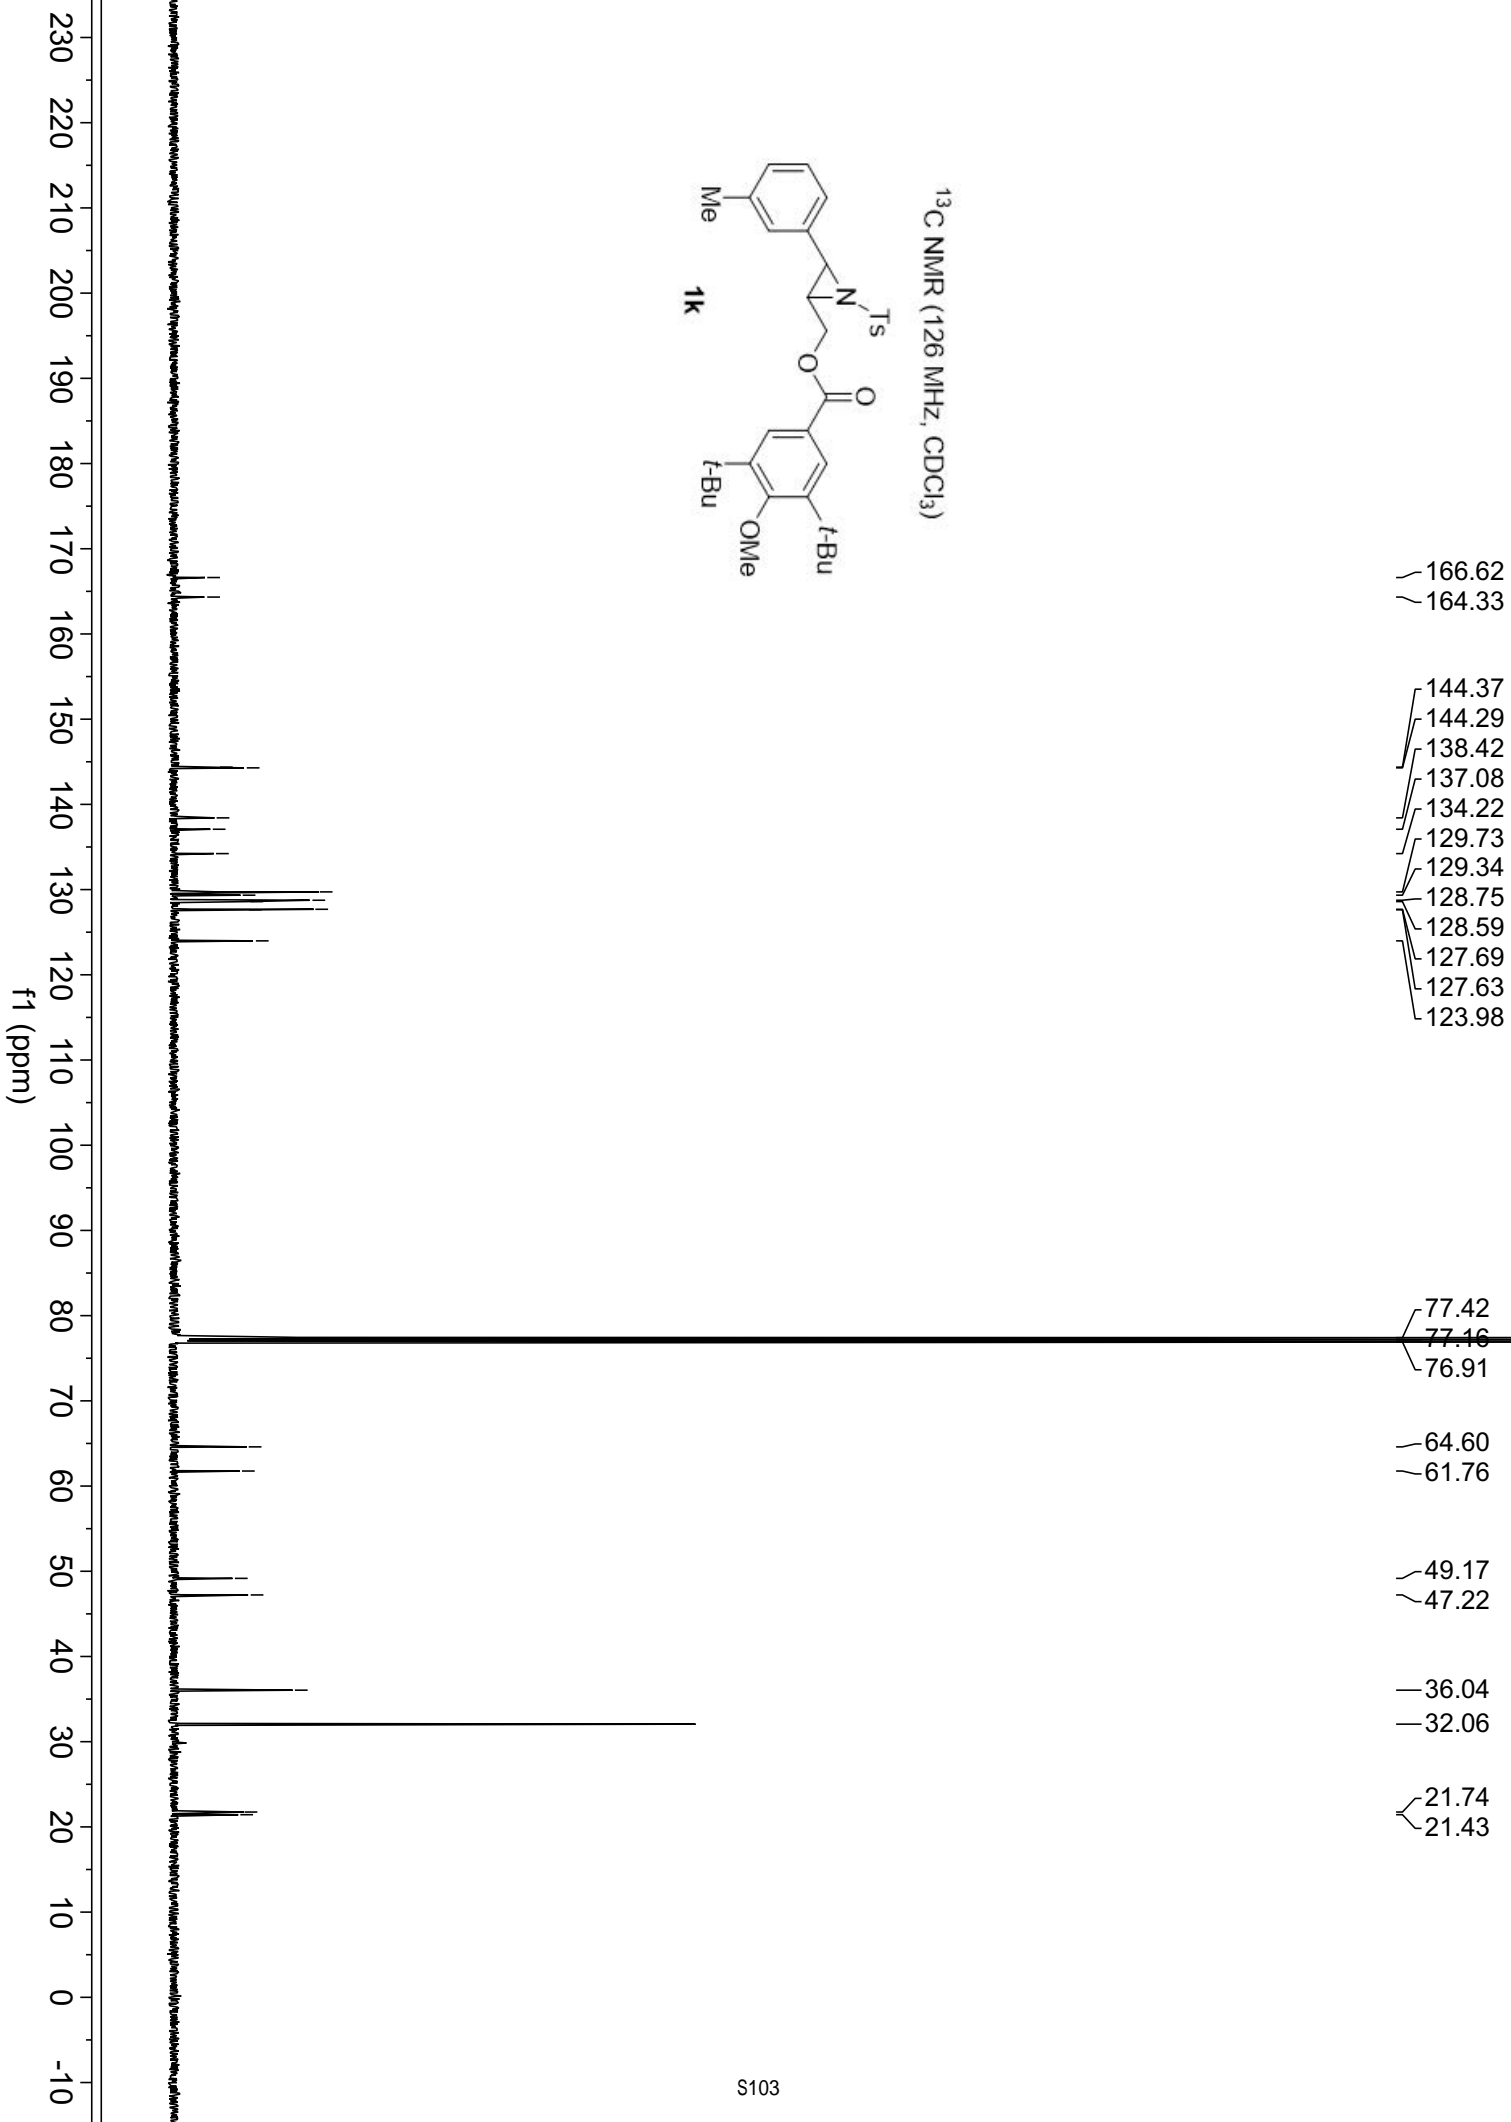

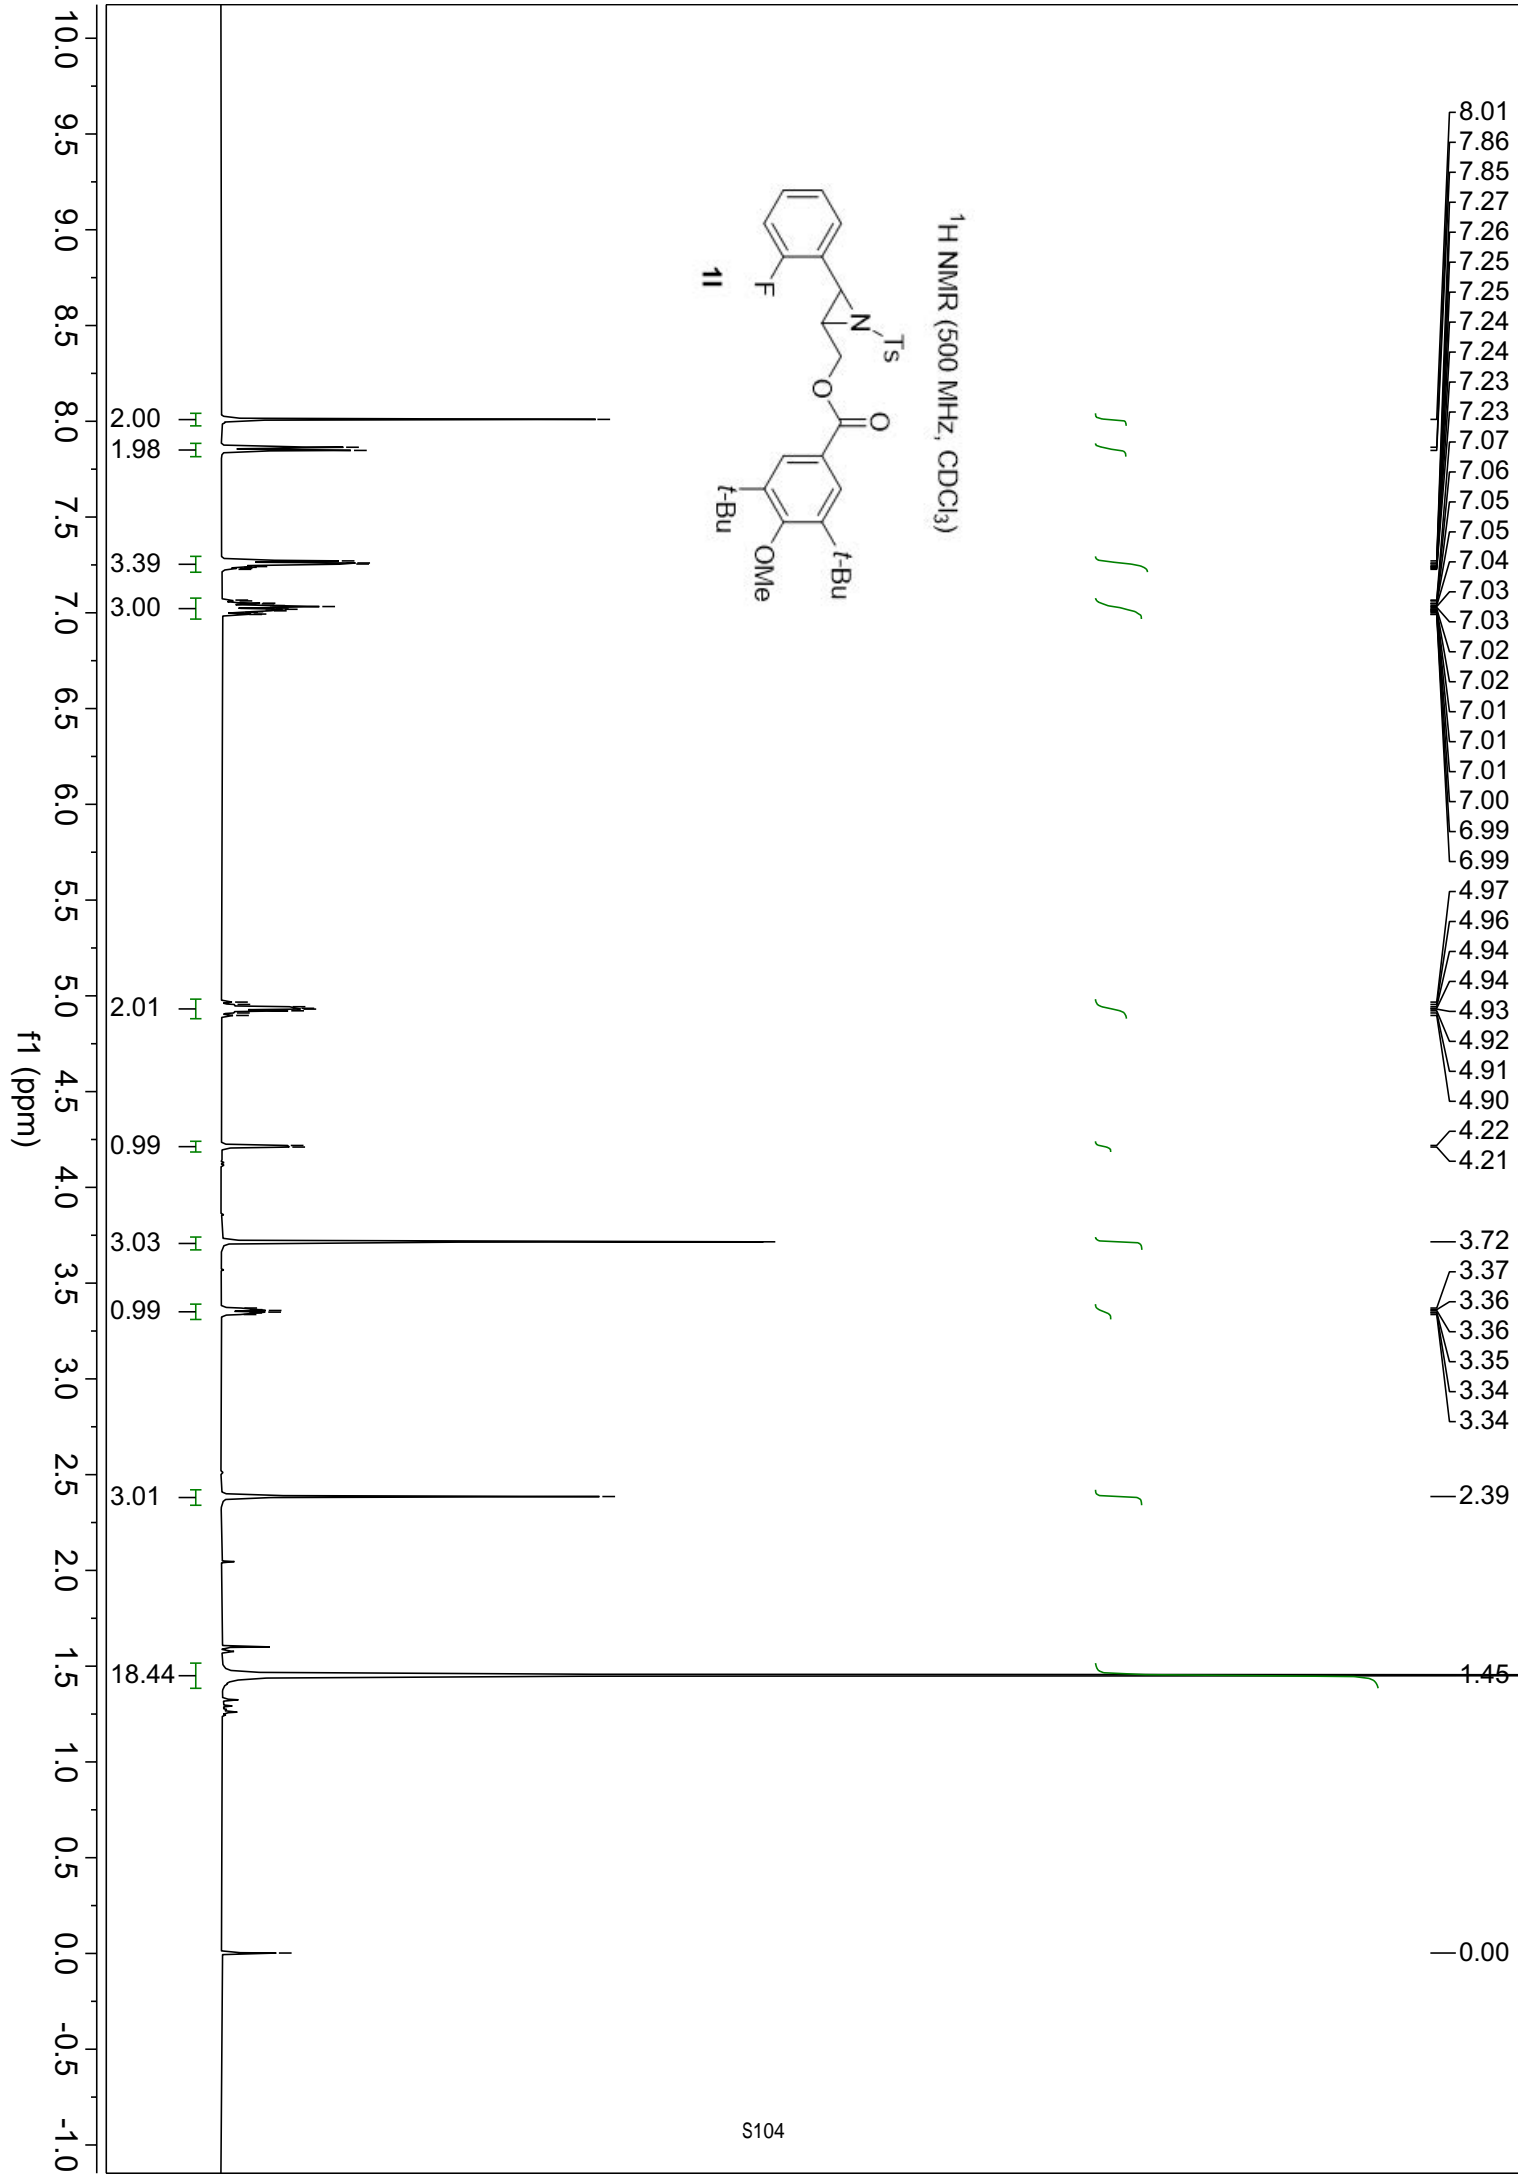



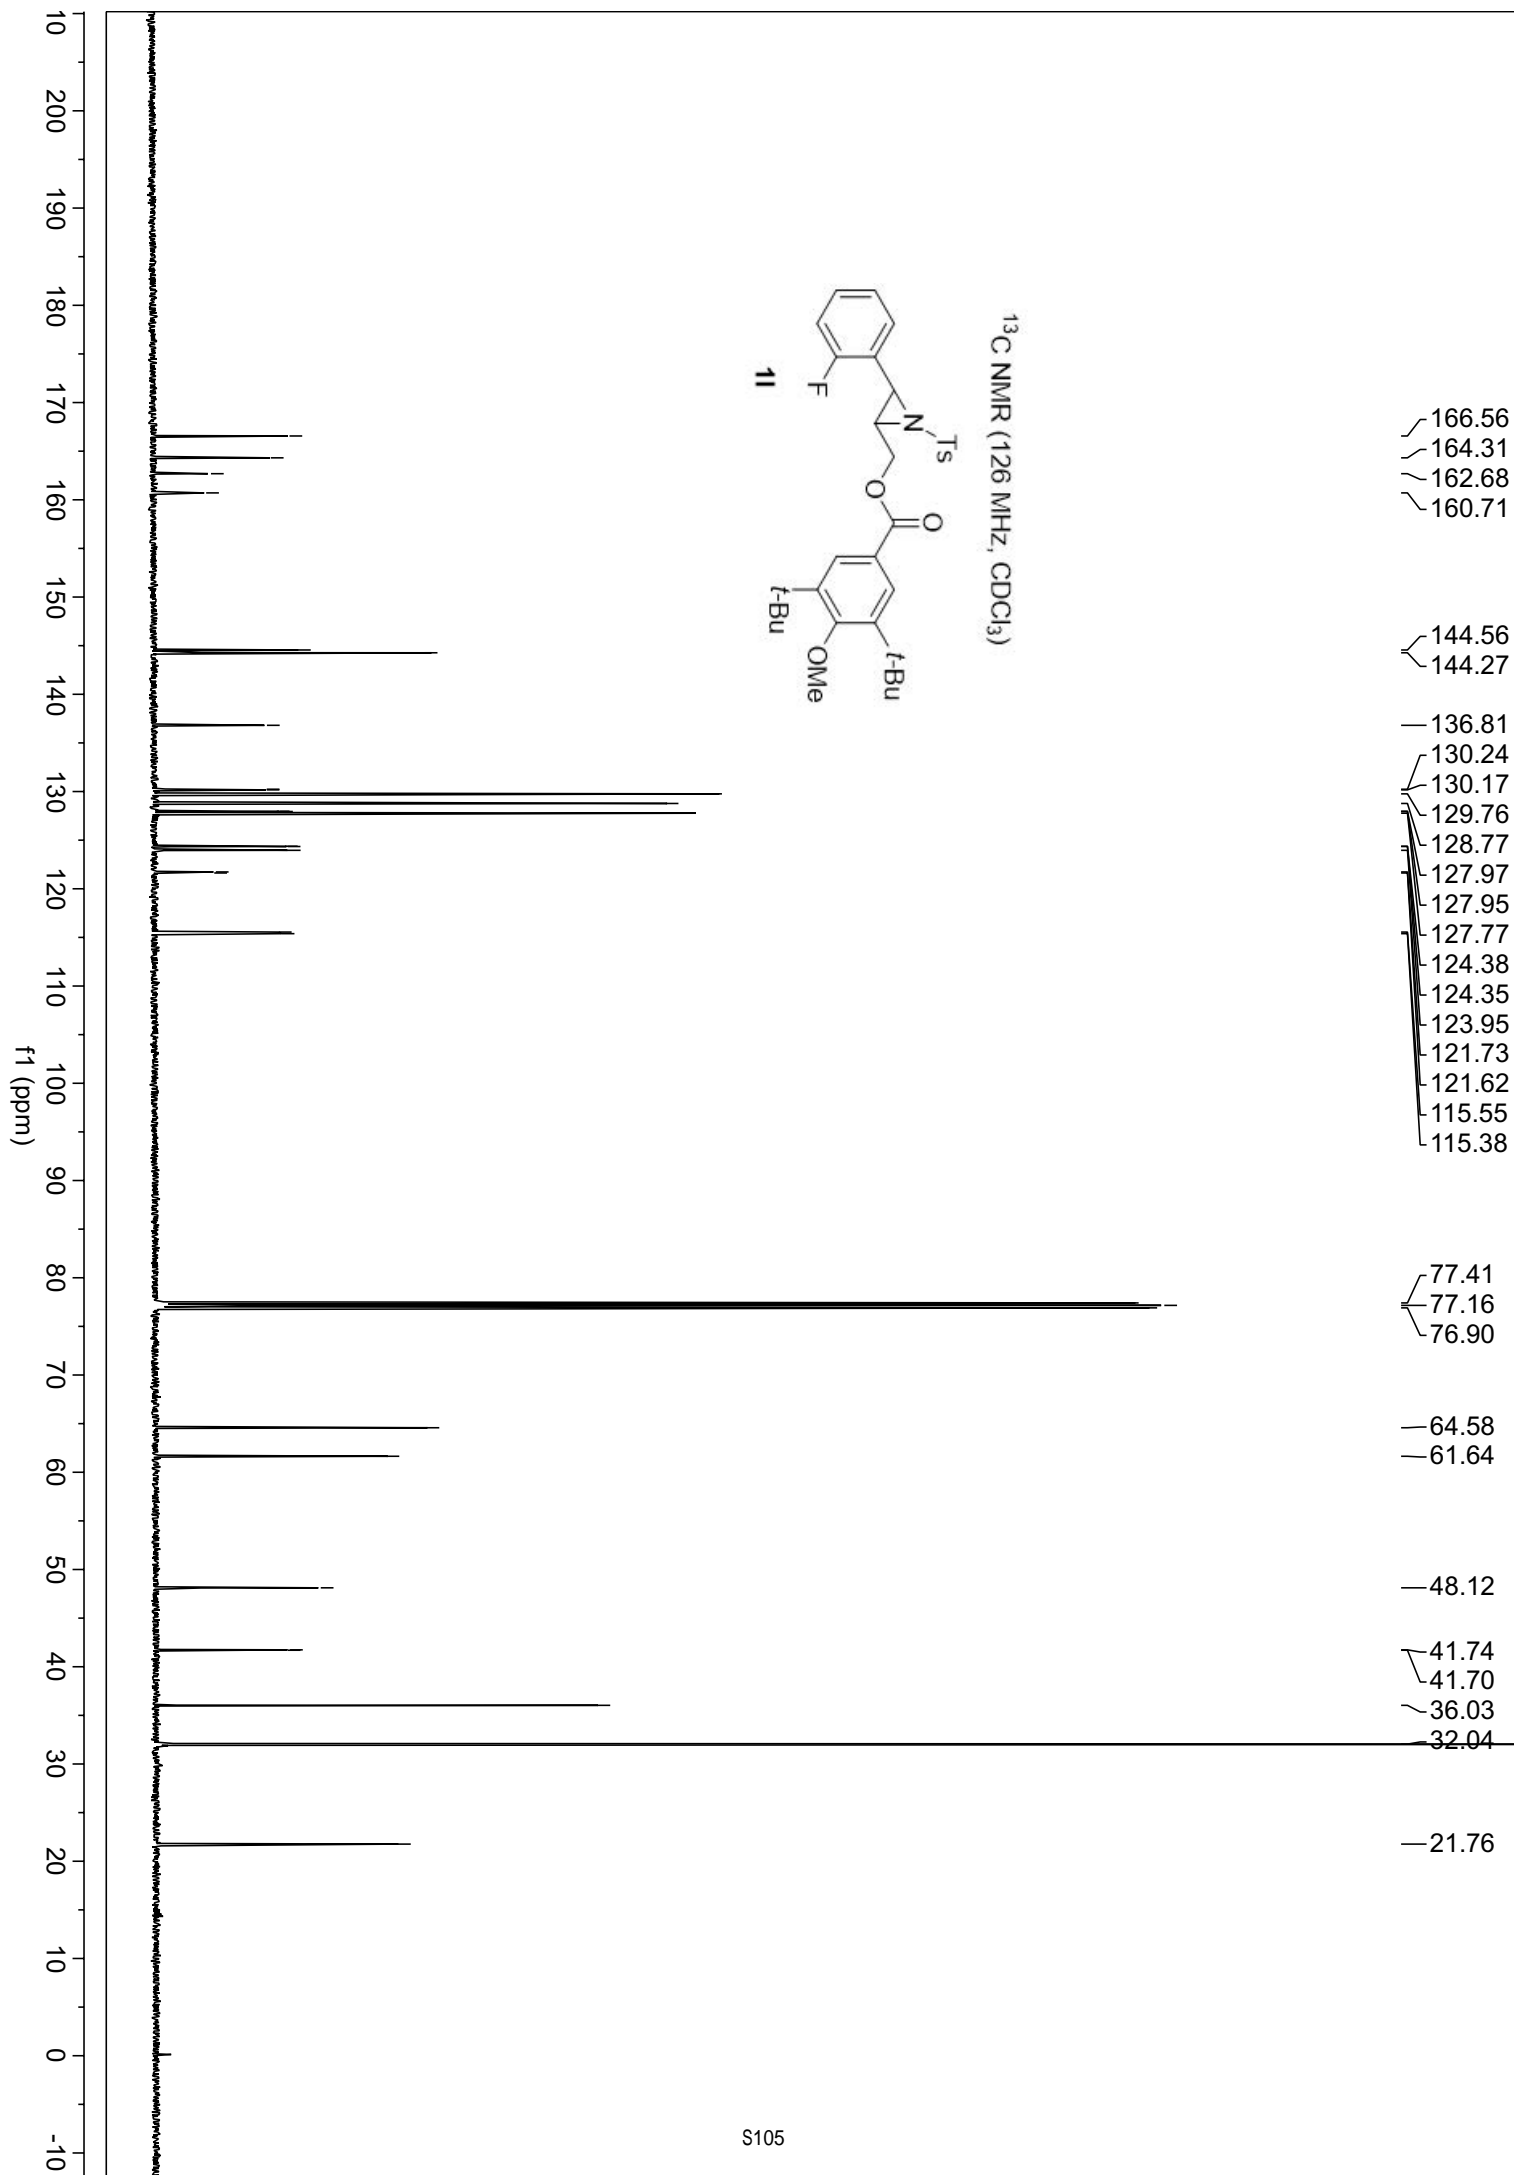

-118.07

$^{19}\text{F}$  NMR (471 MHz,  $\text{CDCl}_3$ )

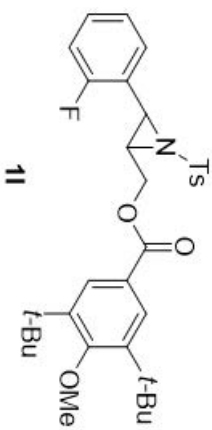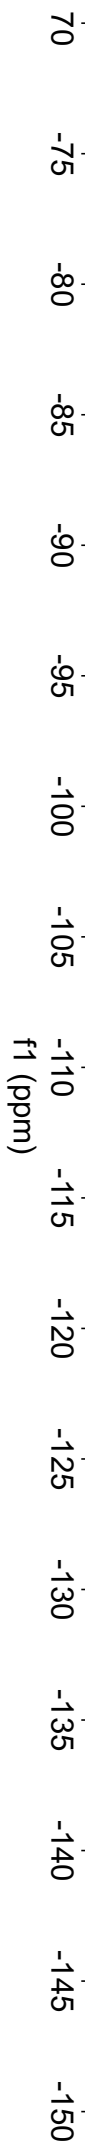

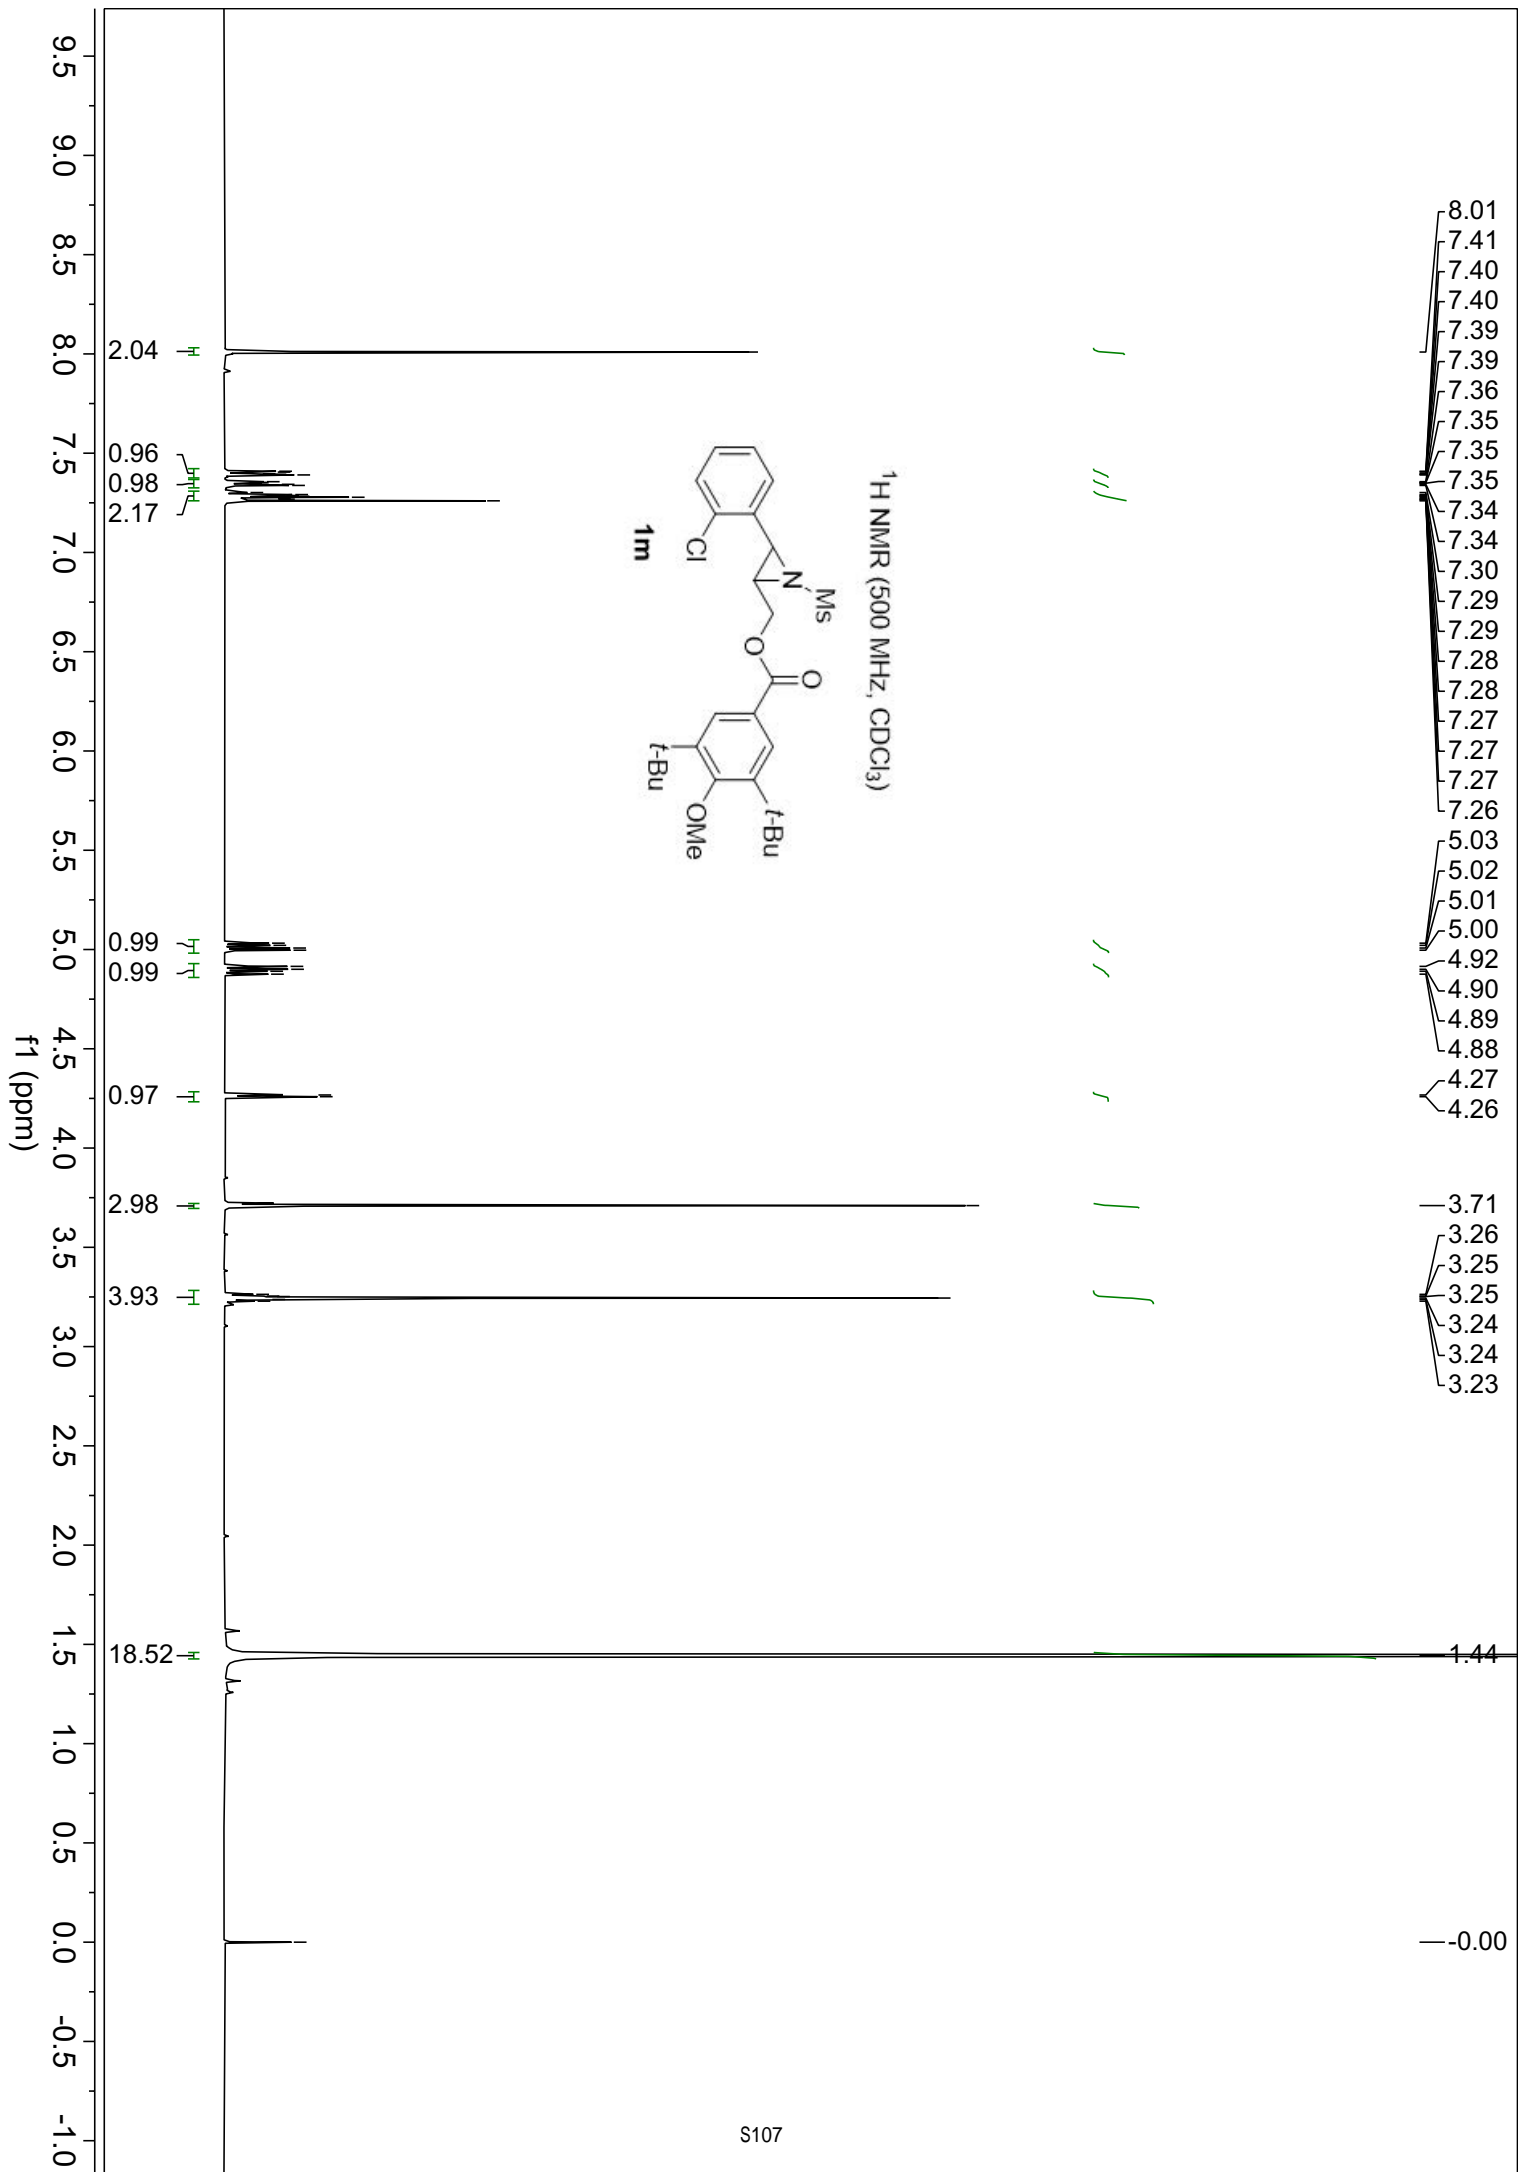

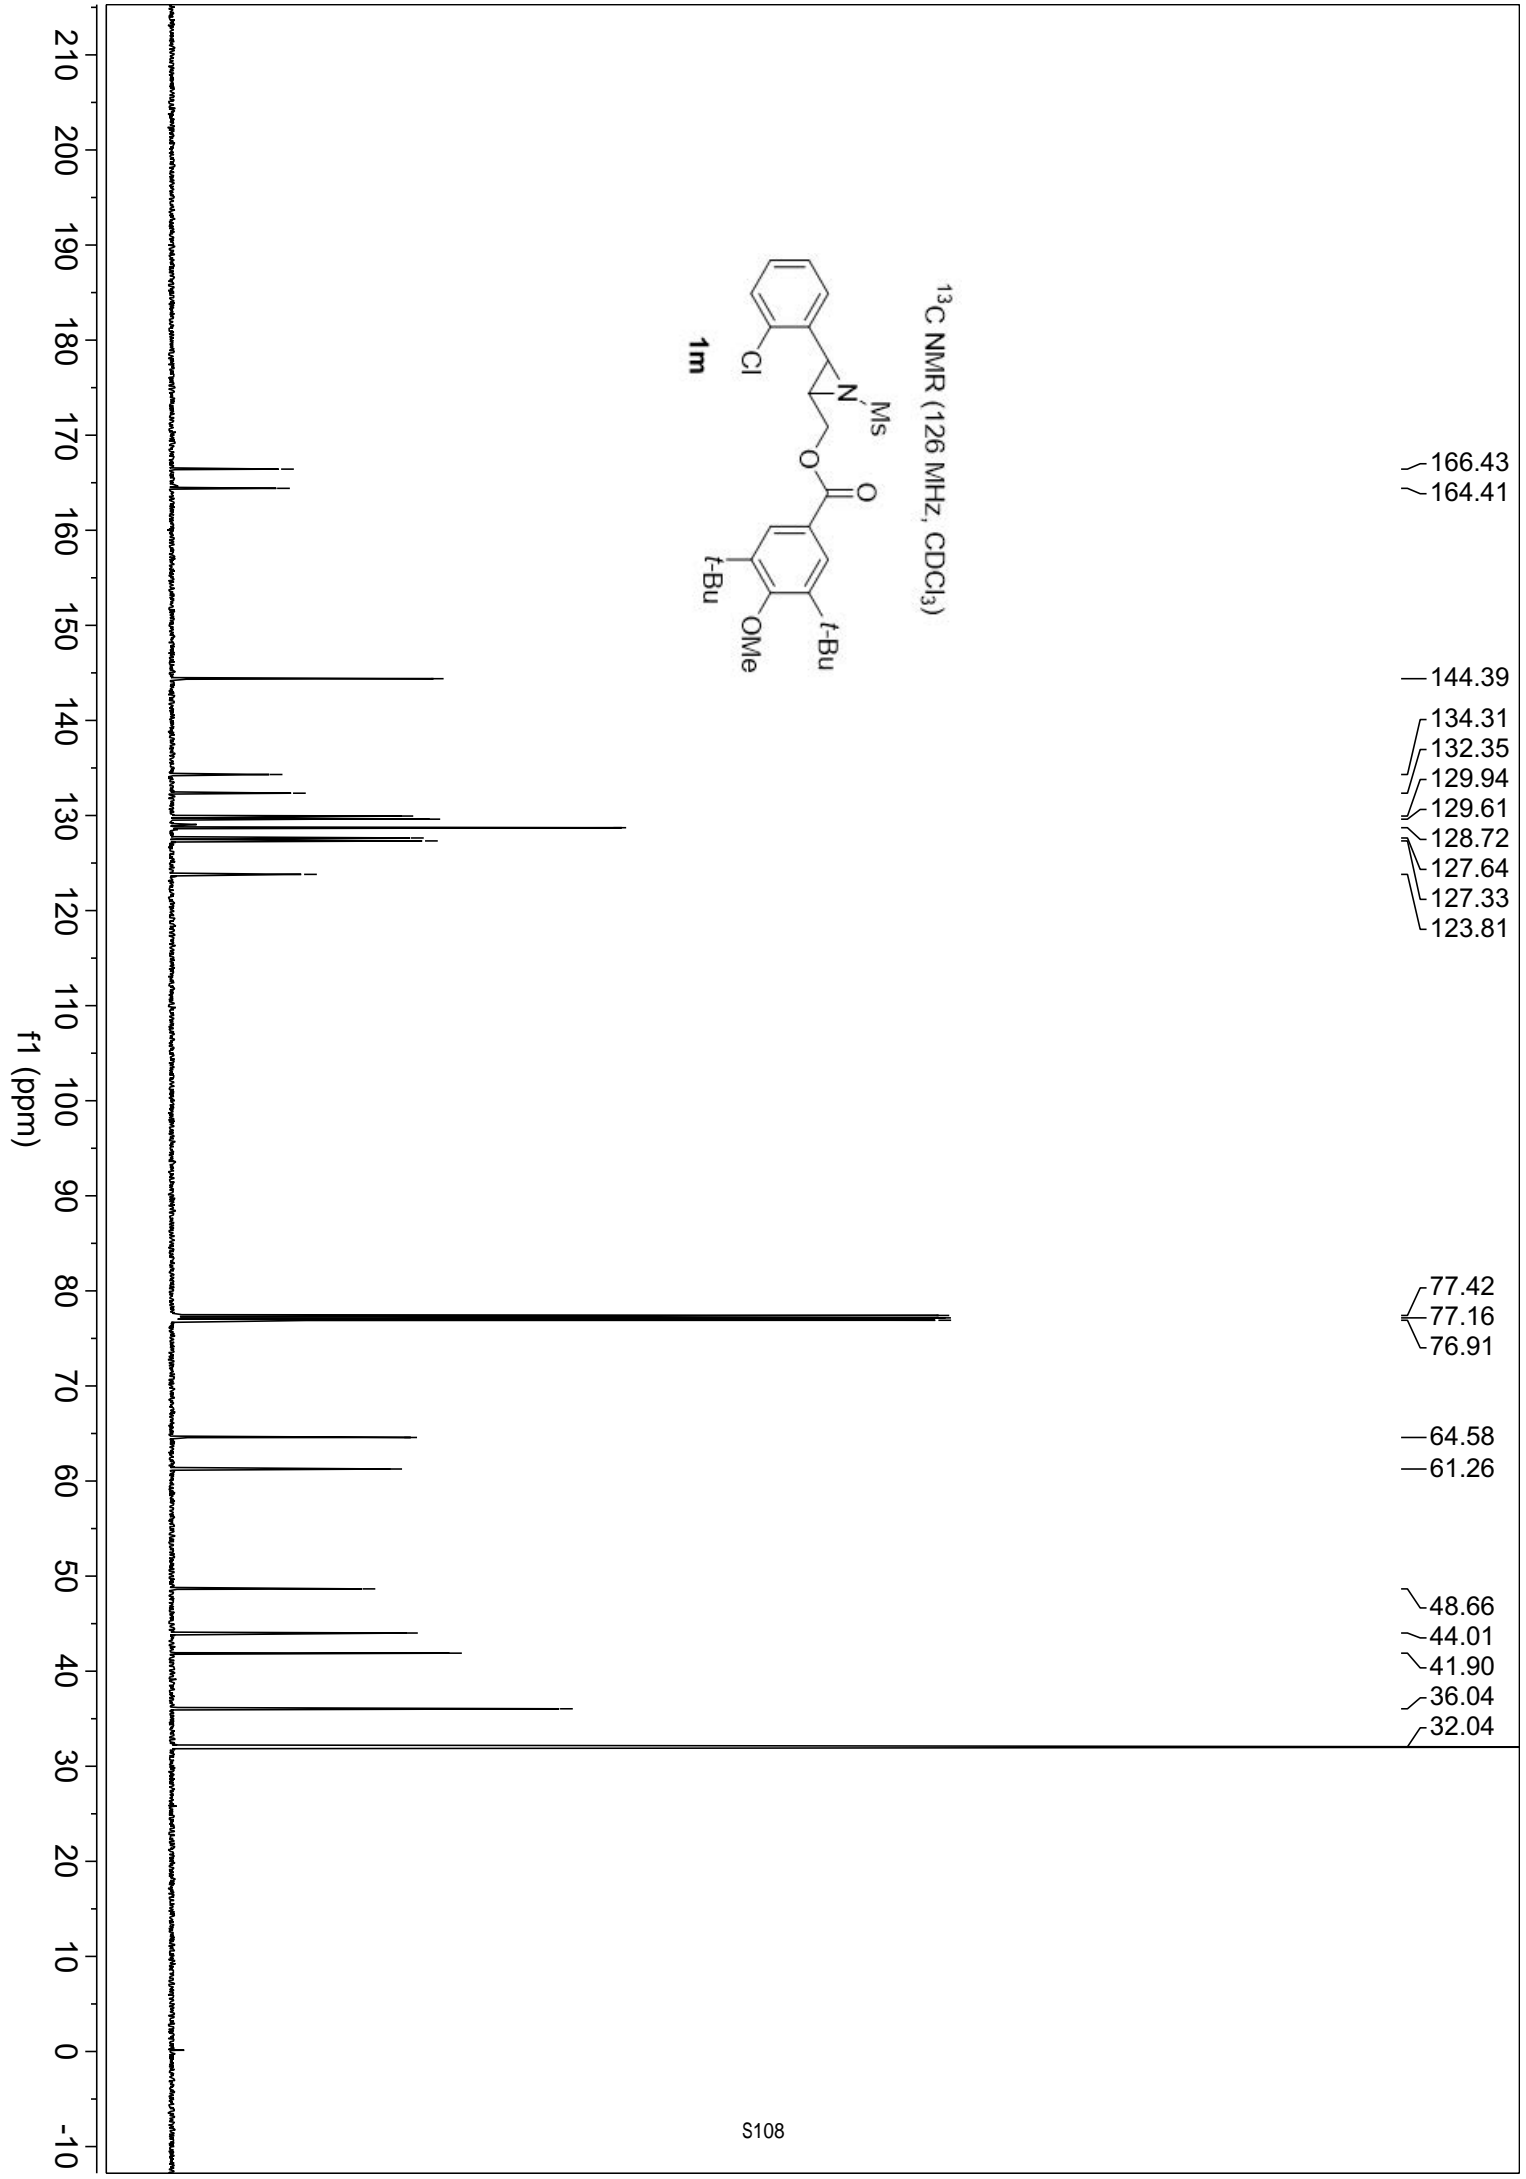

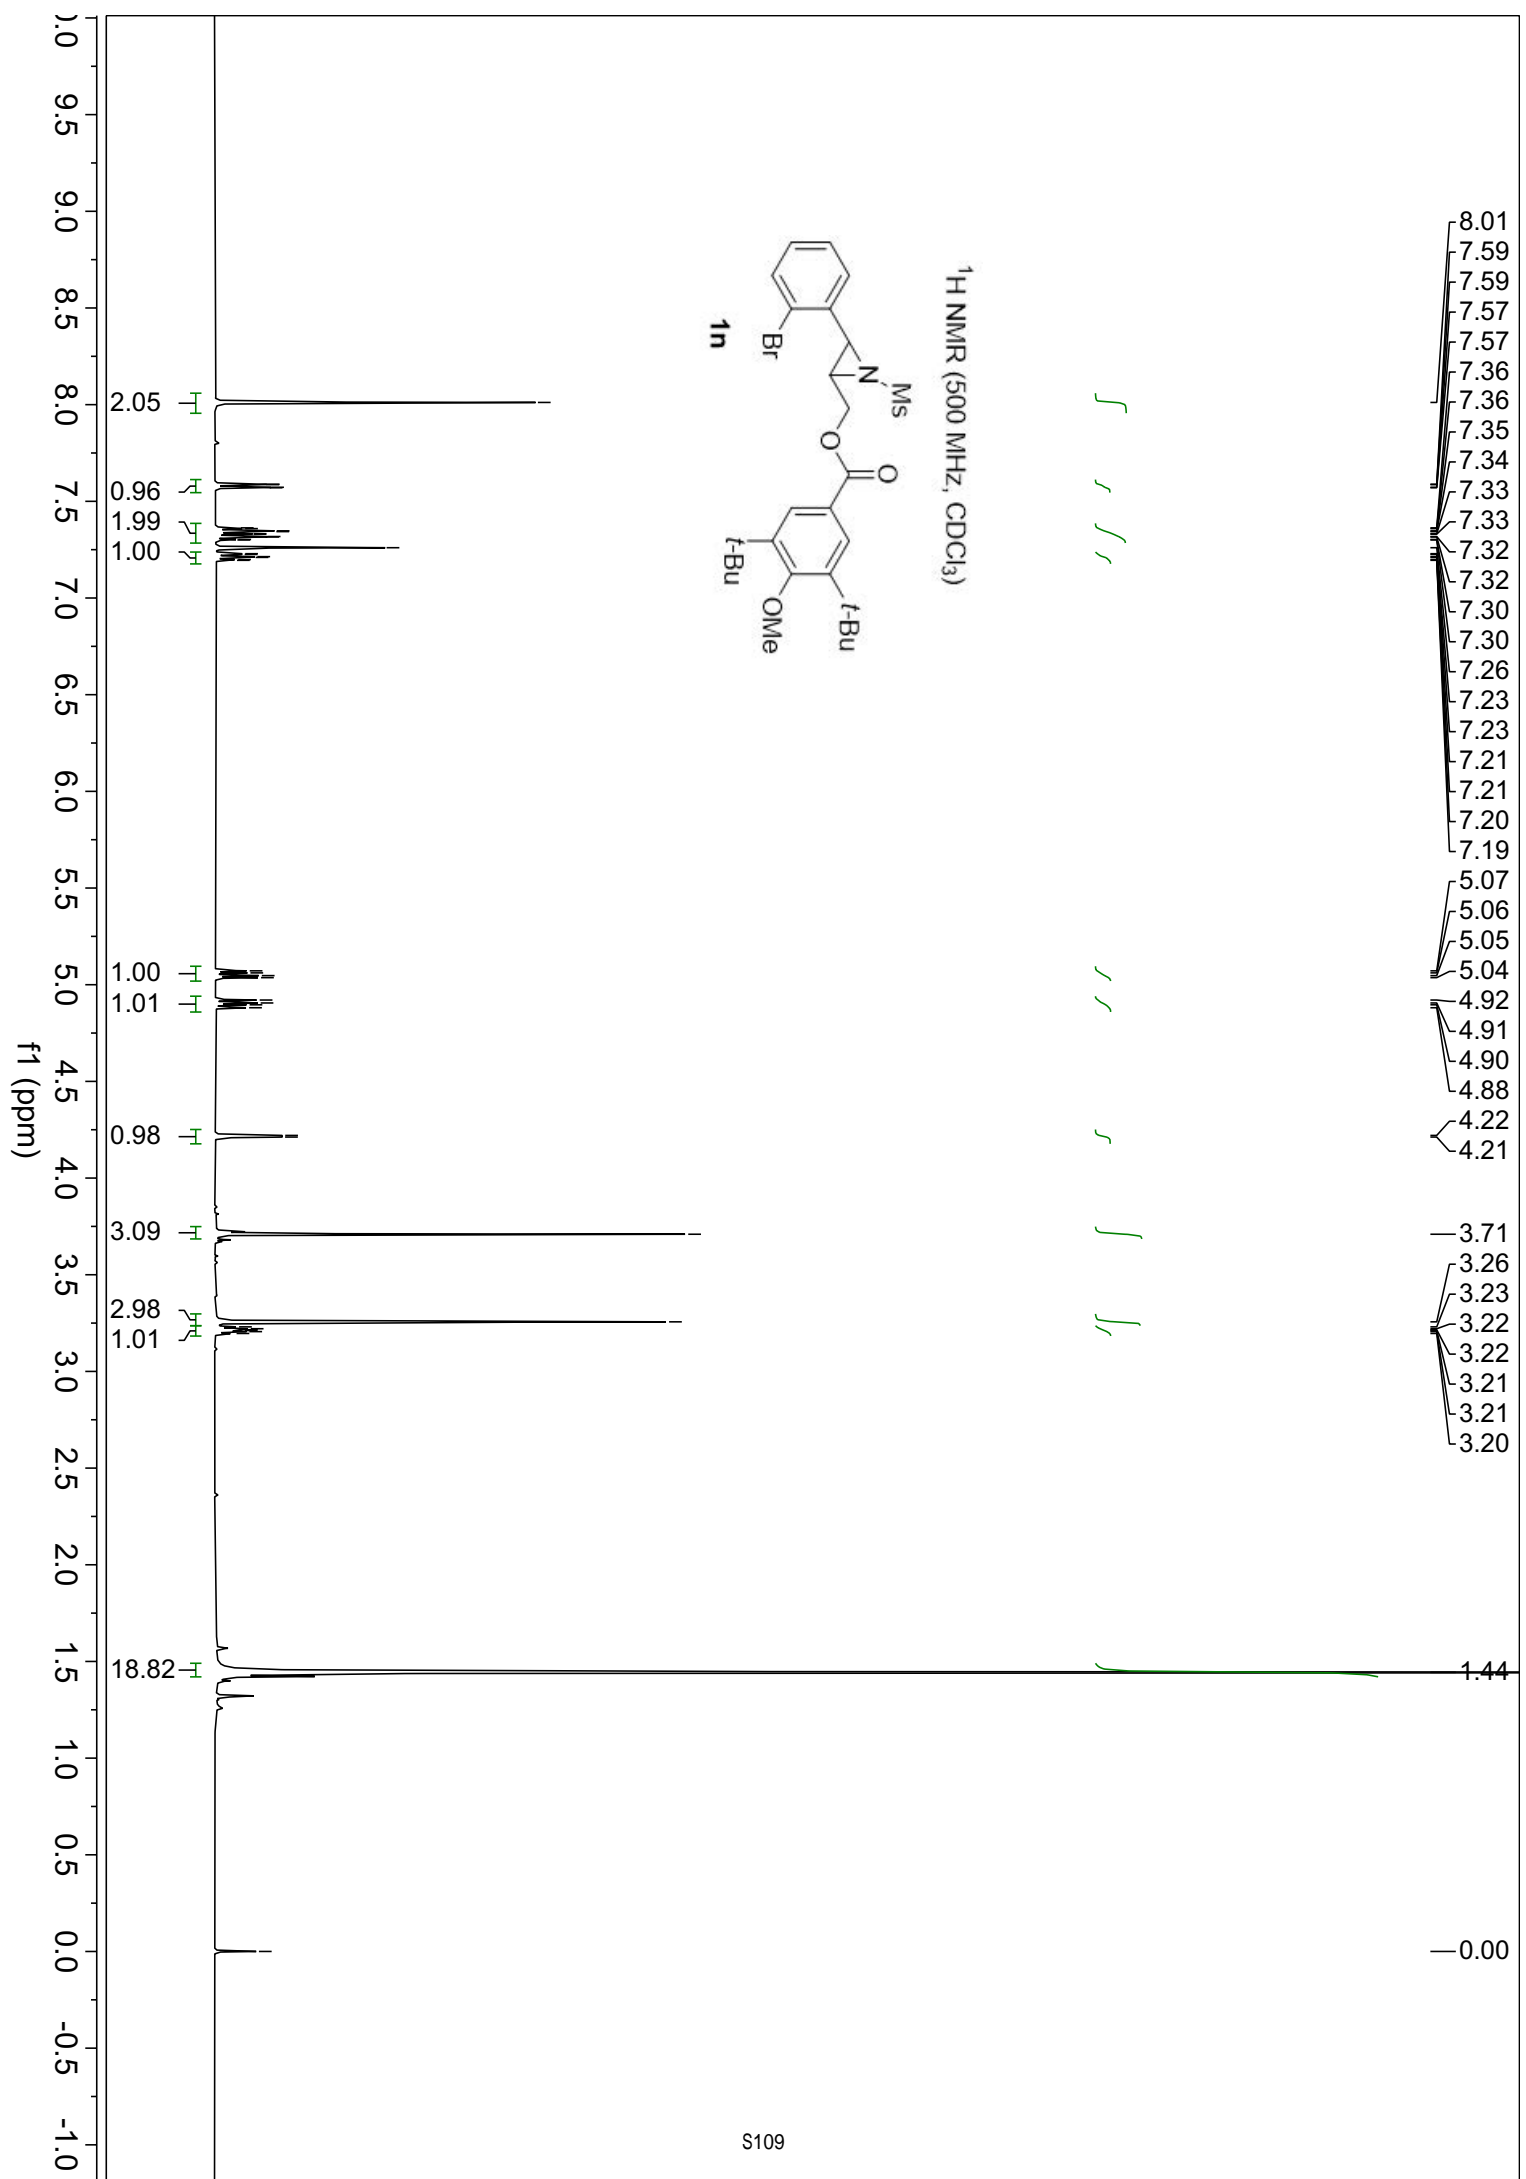

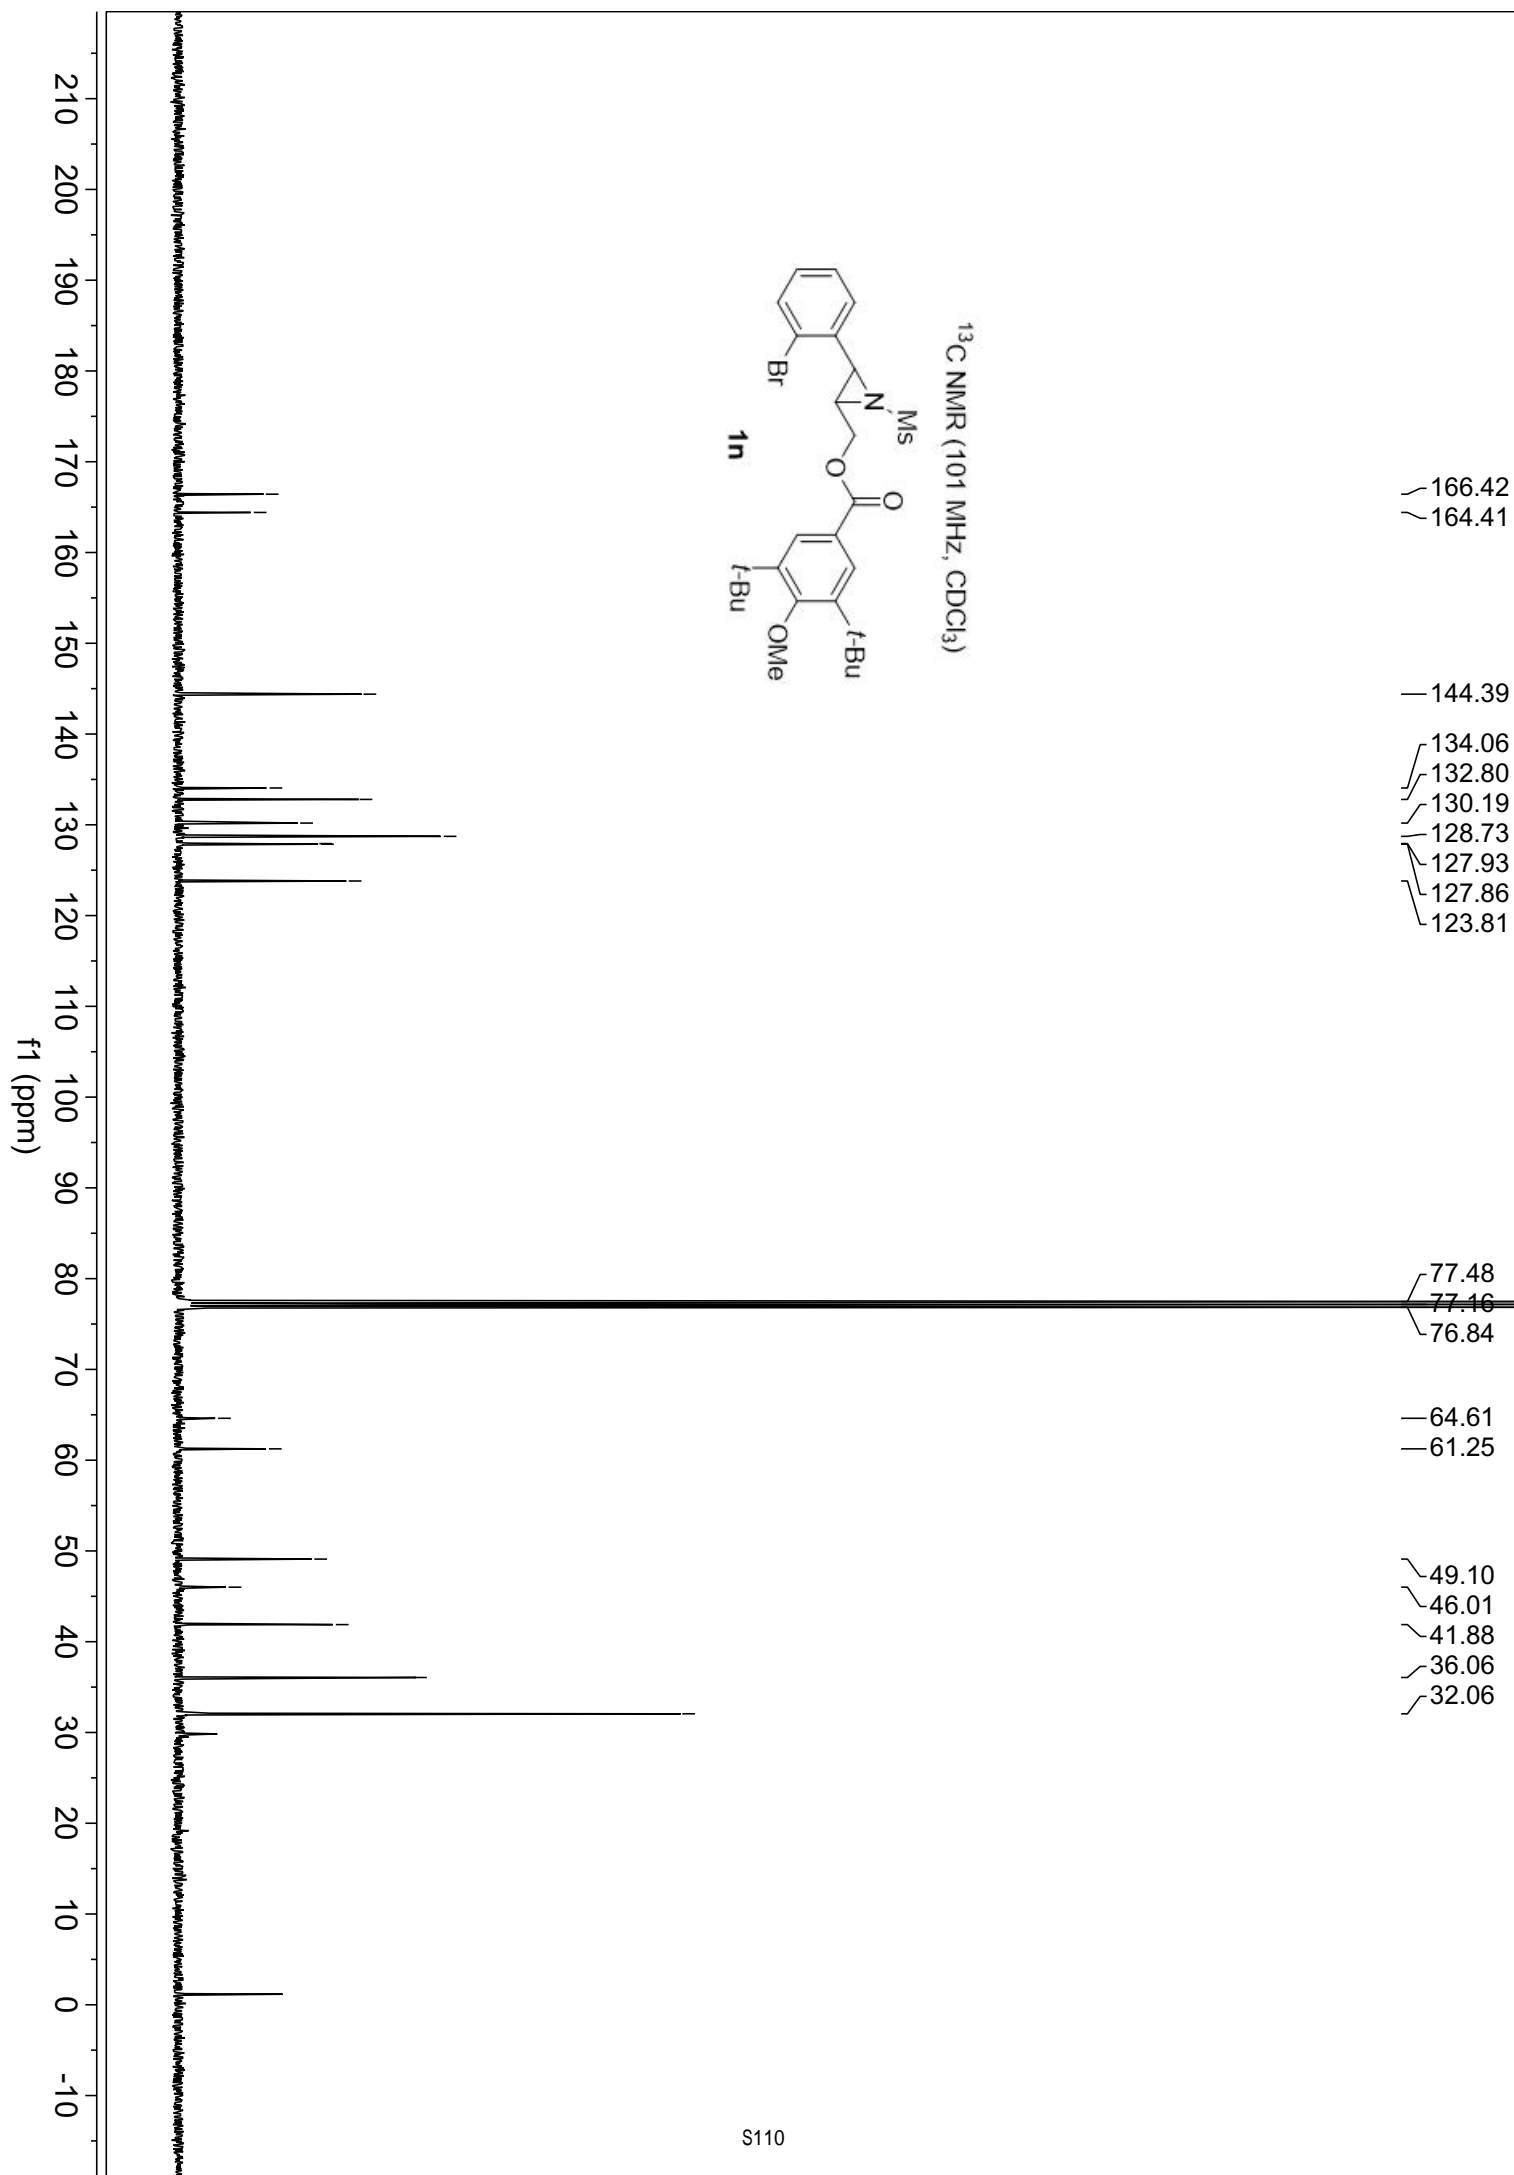

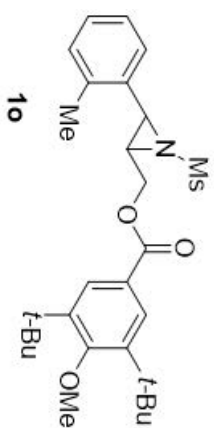

<sup>1</sup>H NMR (500 MHz, CDCl<sub>3</sub>)

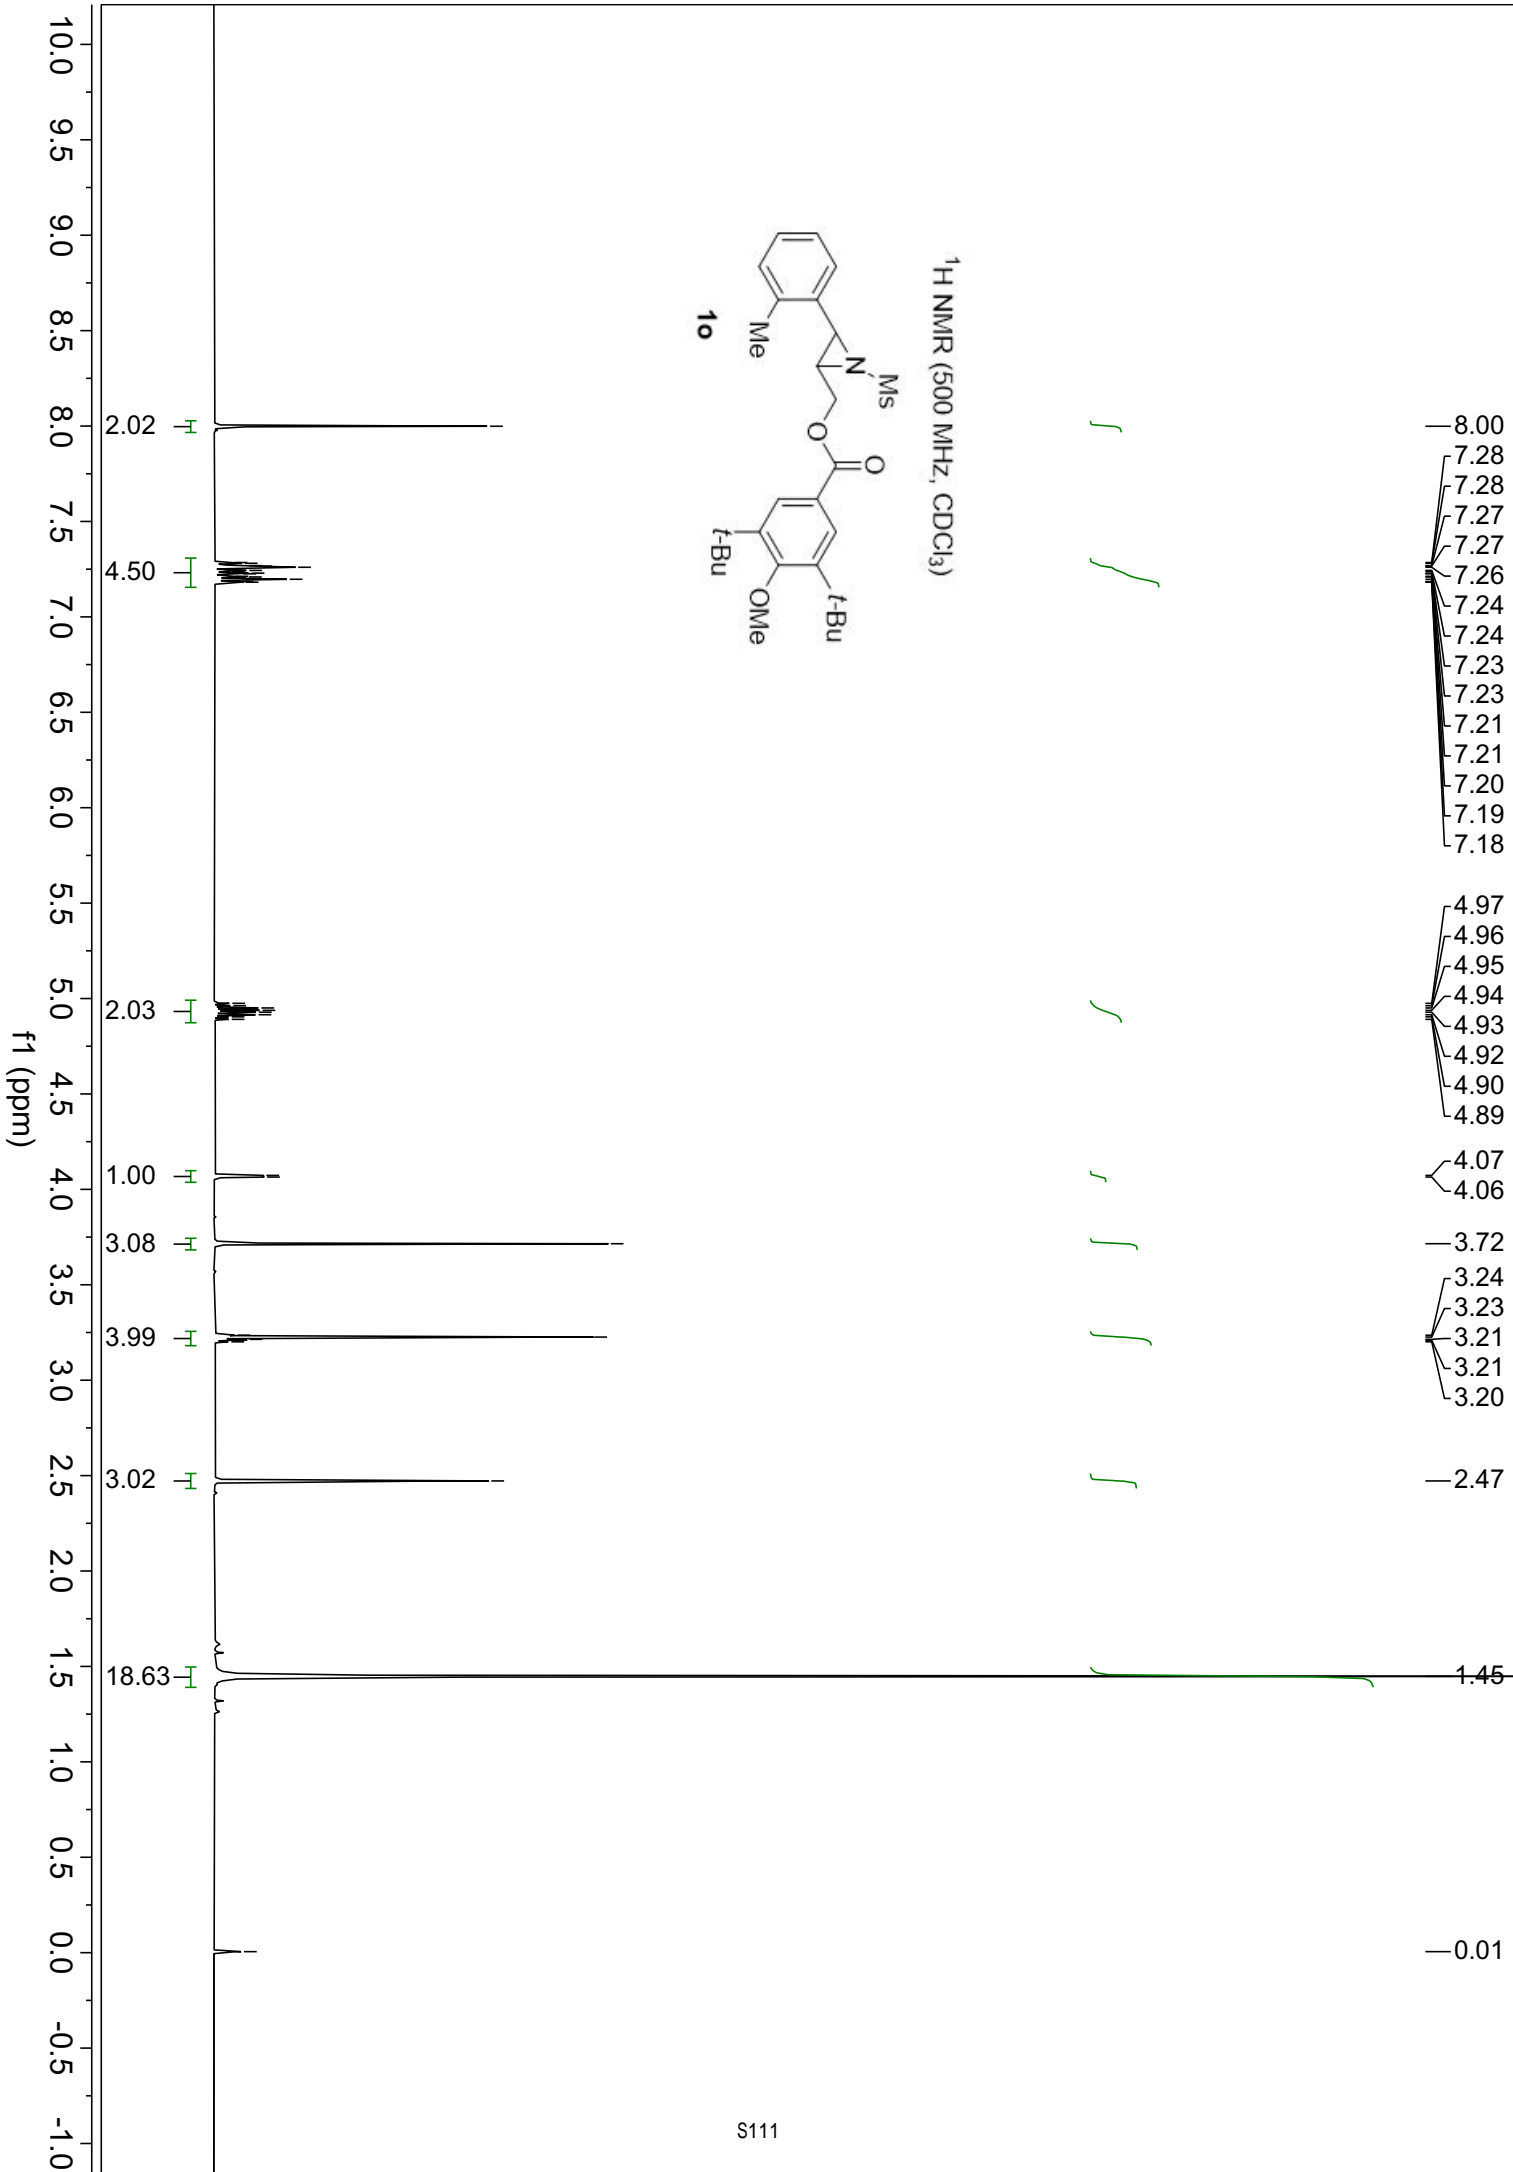

<sup>13</sup>C NMR (126 MHz, CDCl<sub>3</sub>)

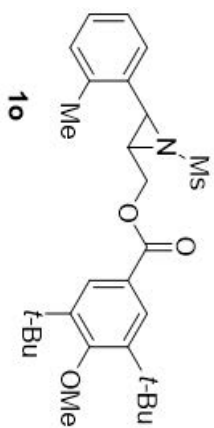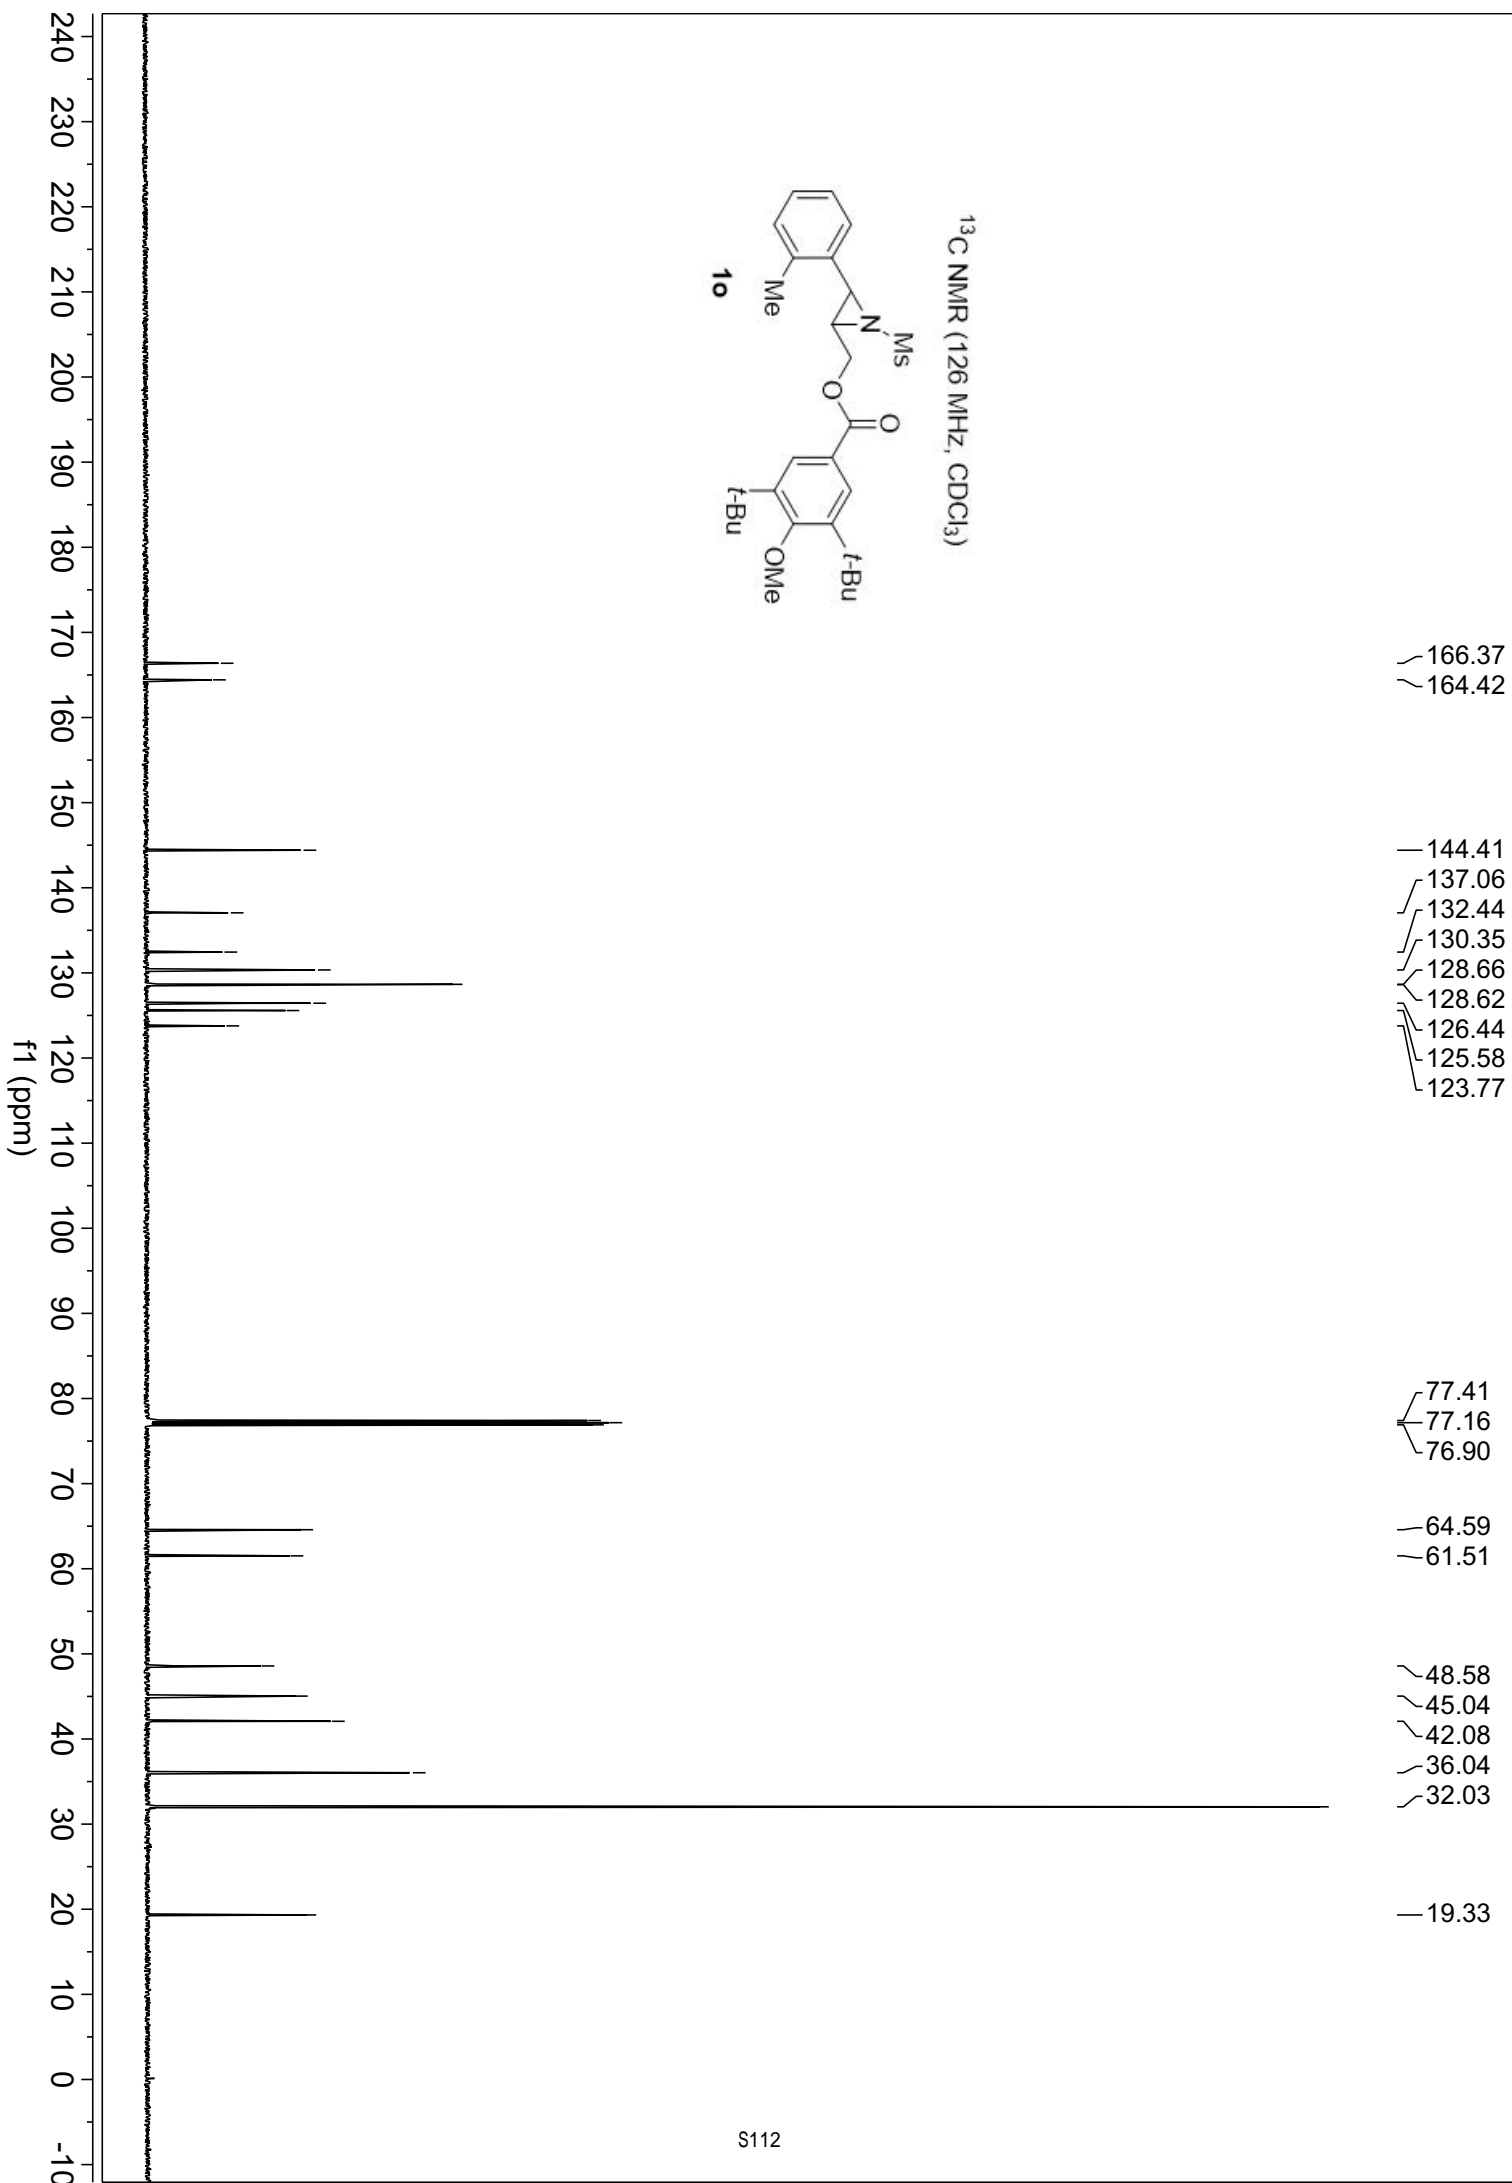



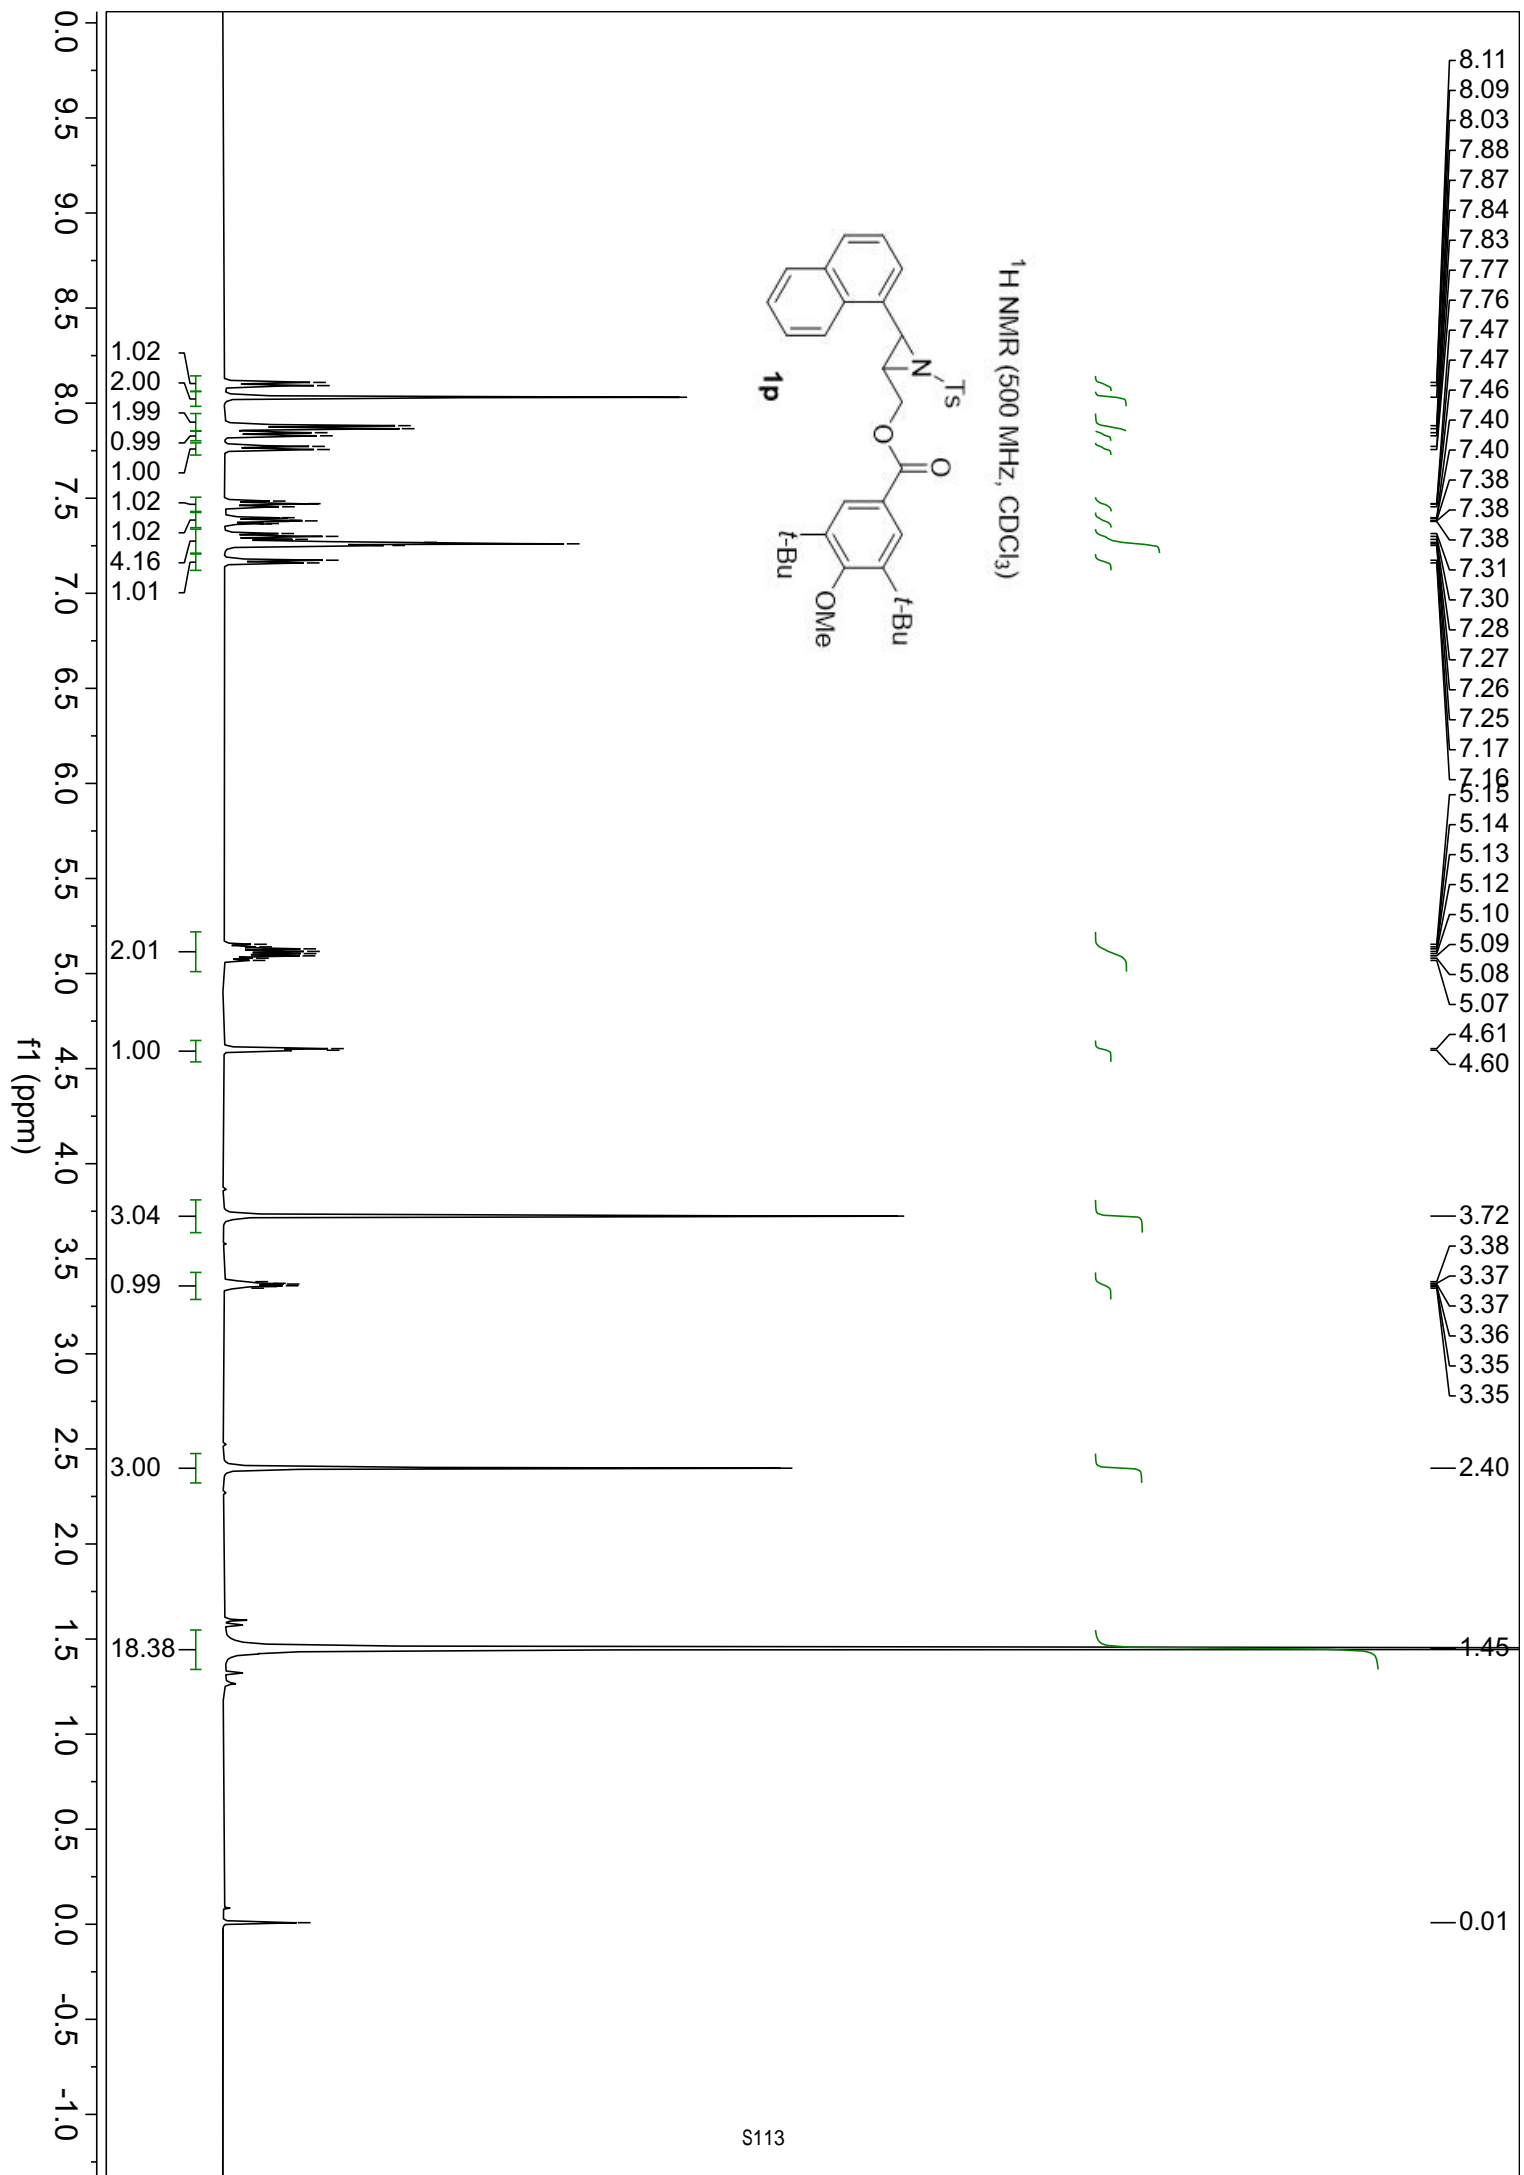

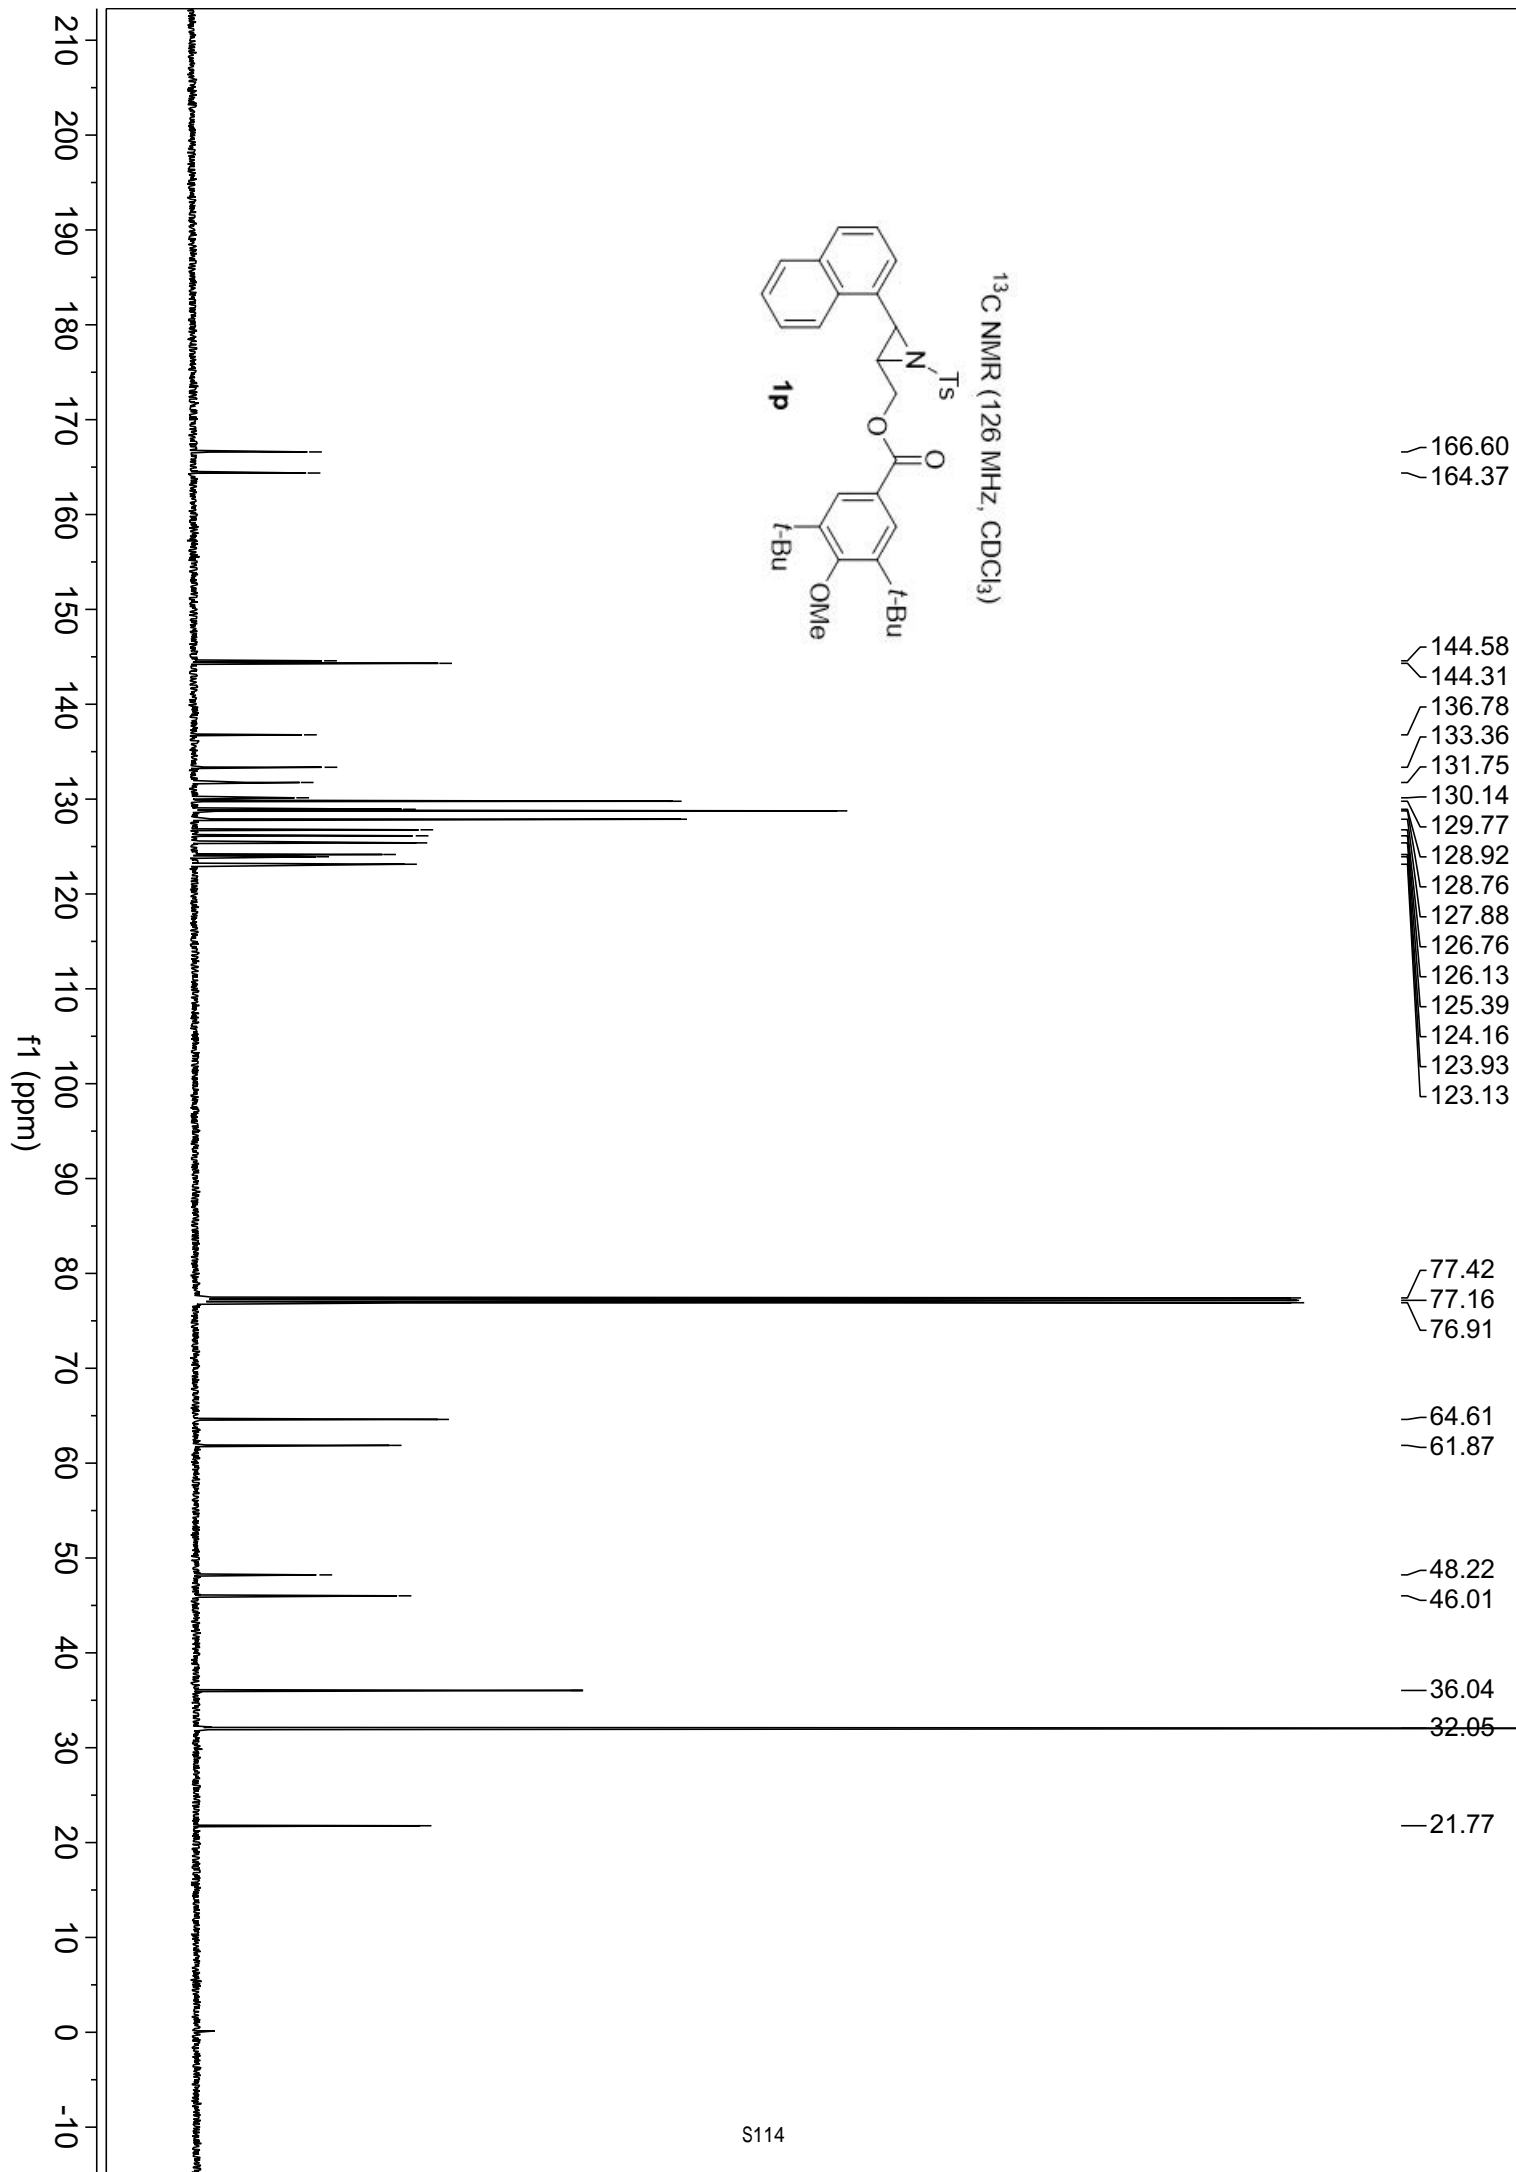

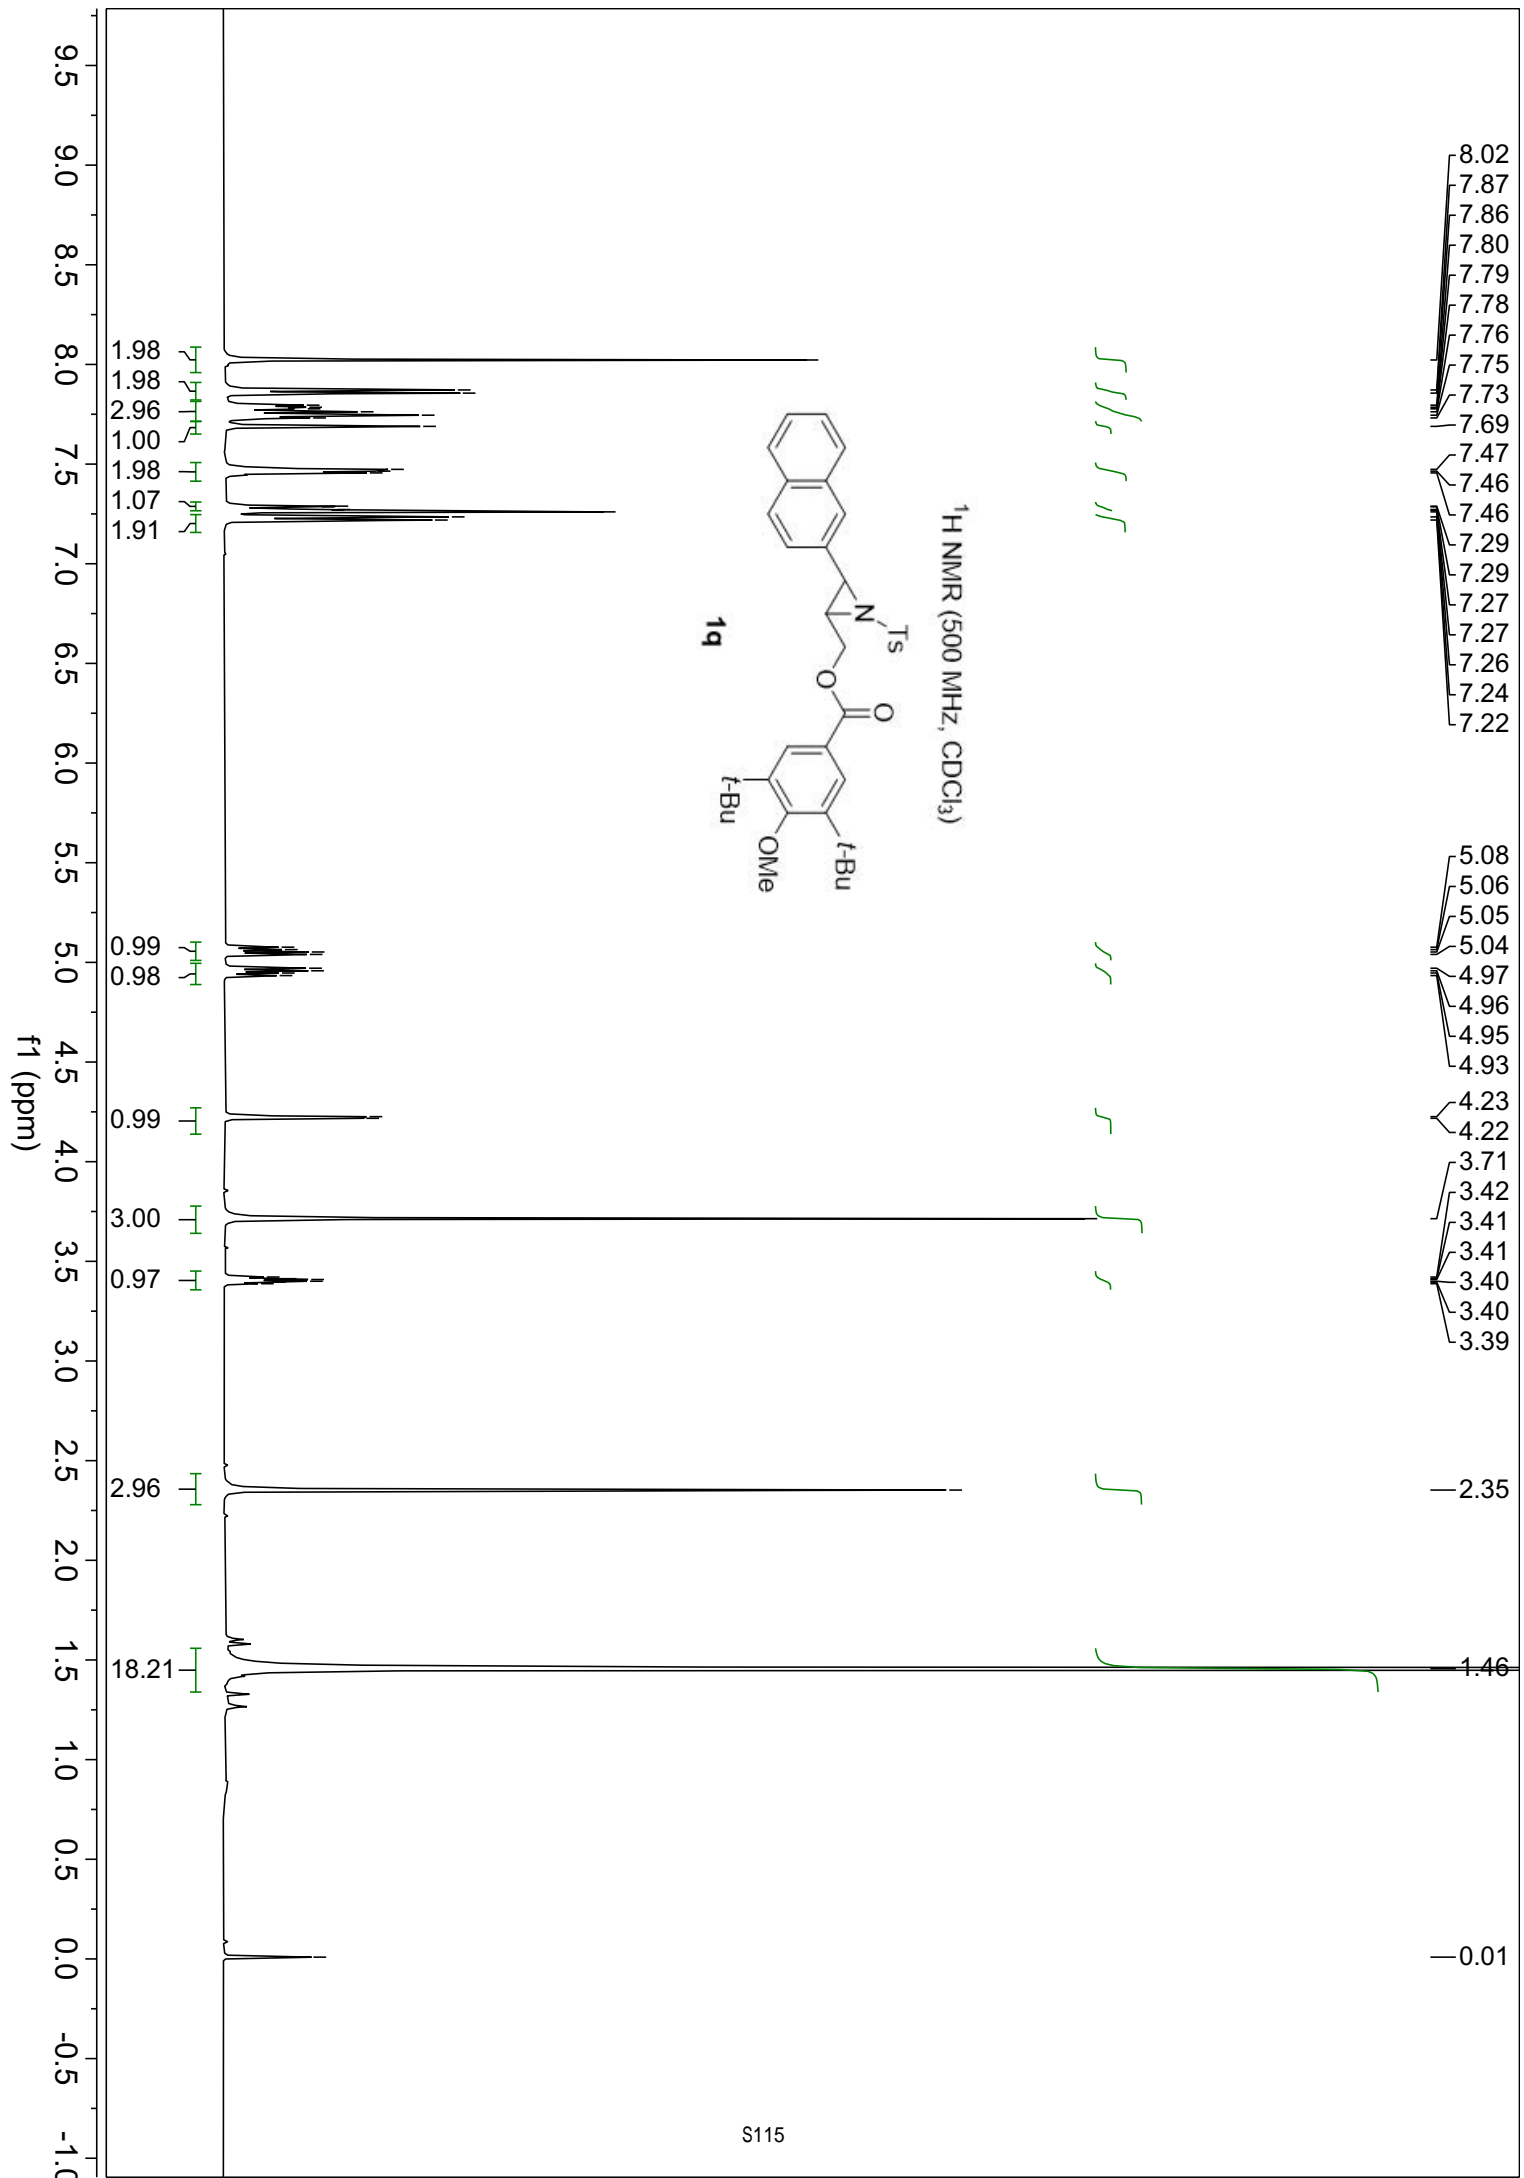

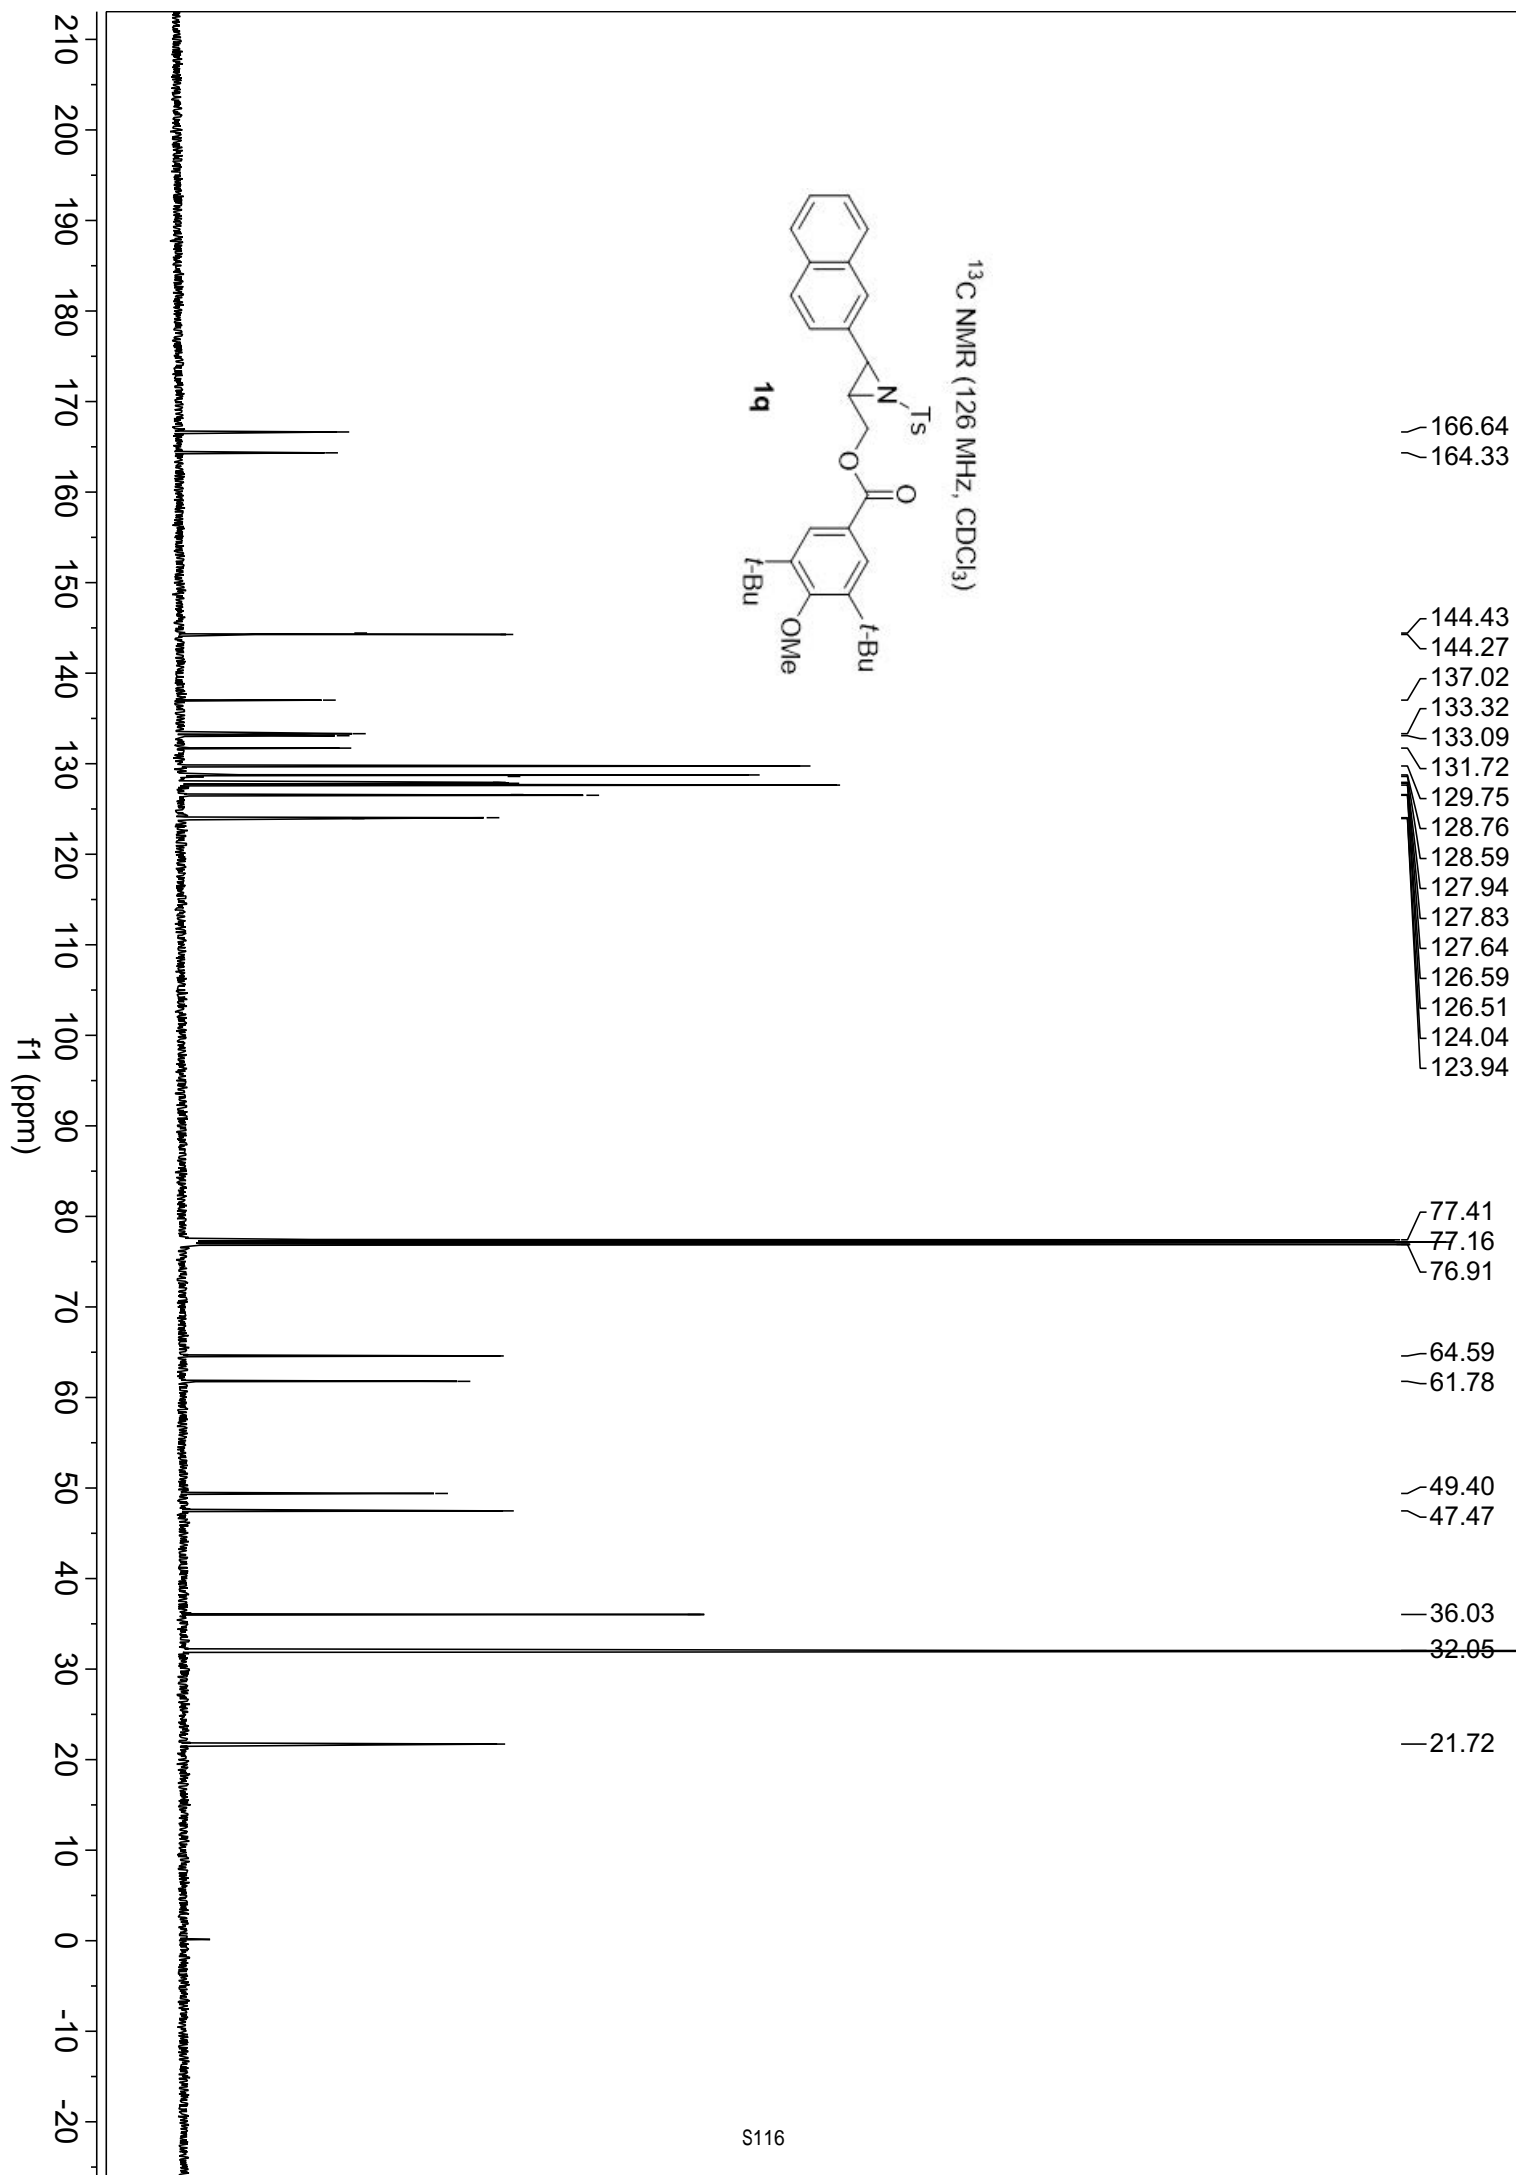

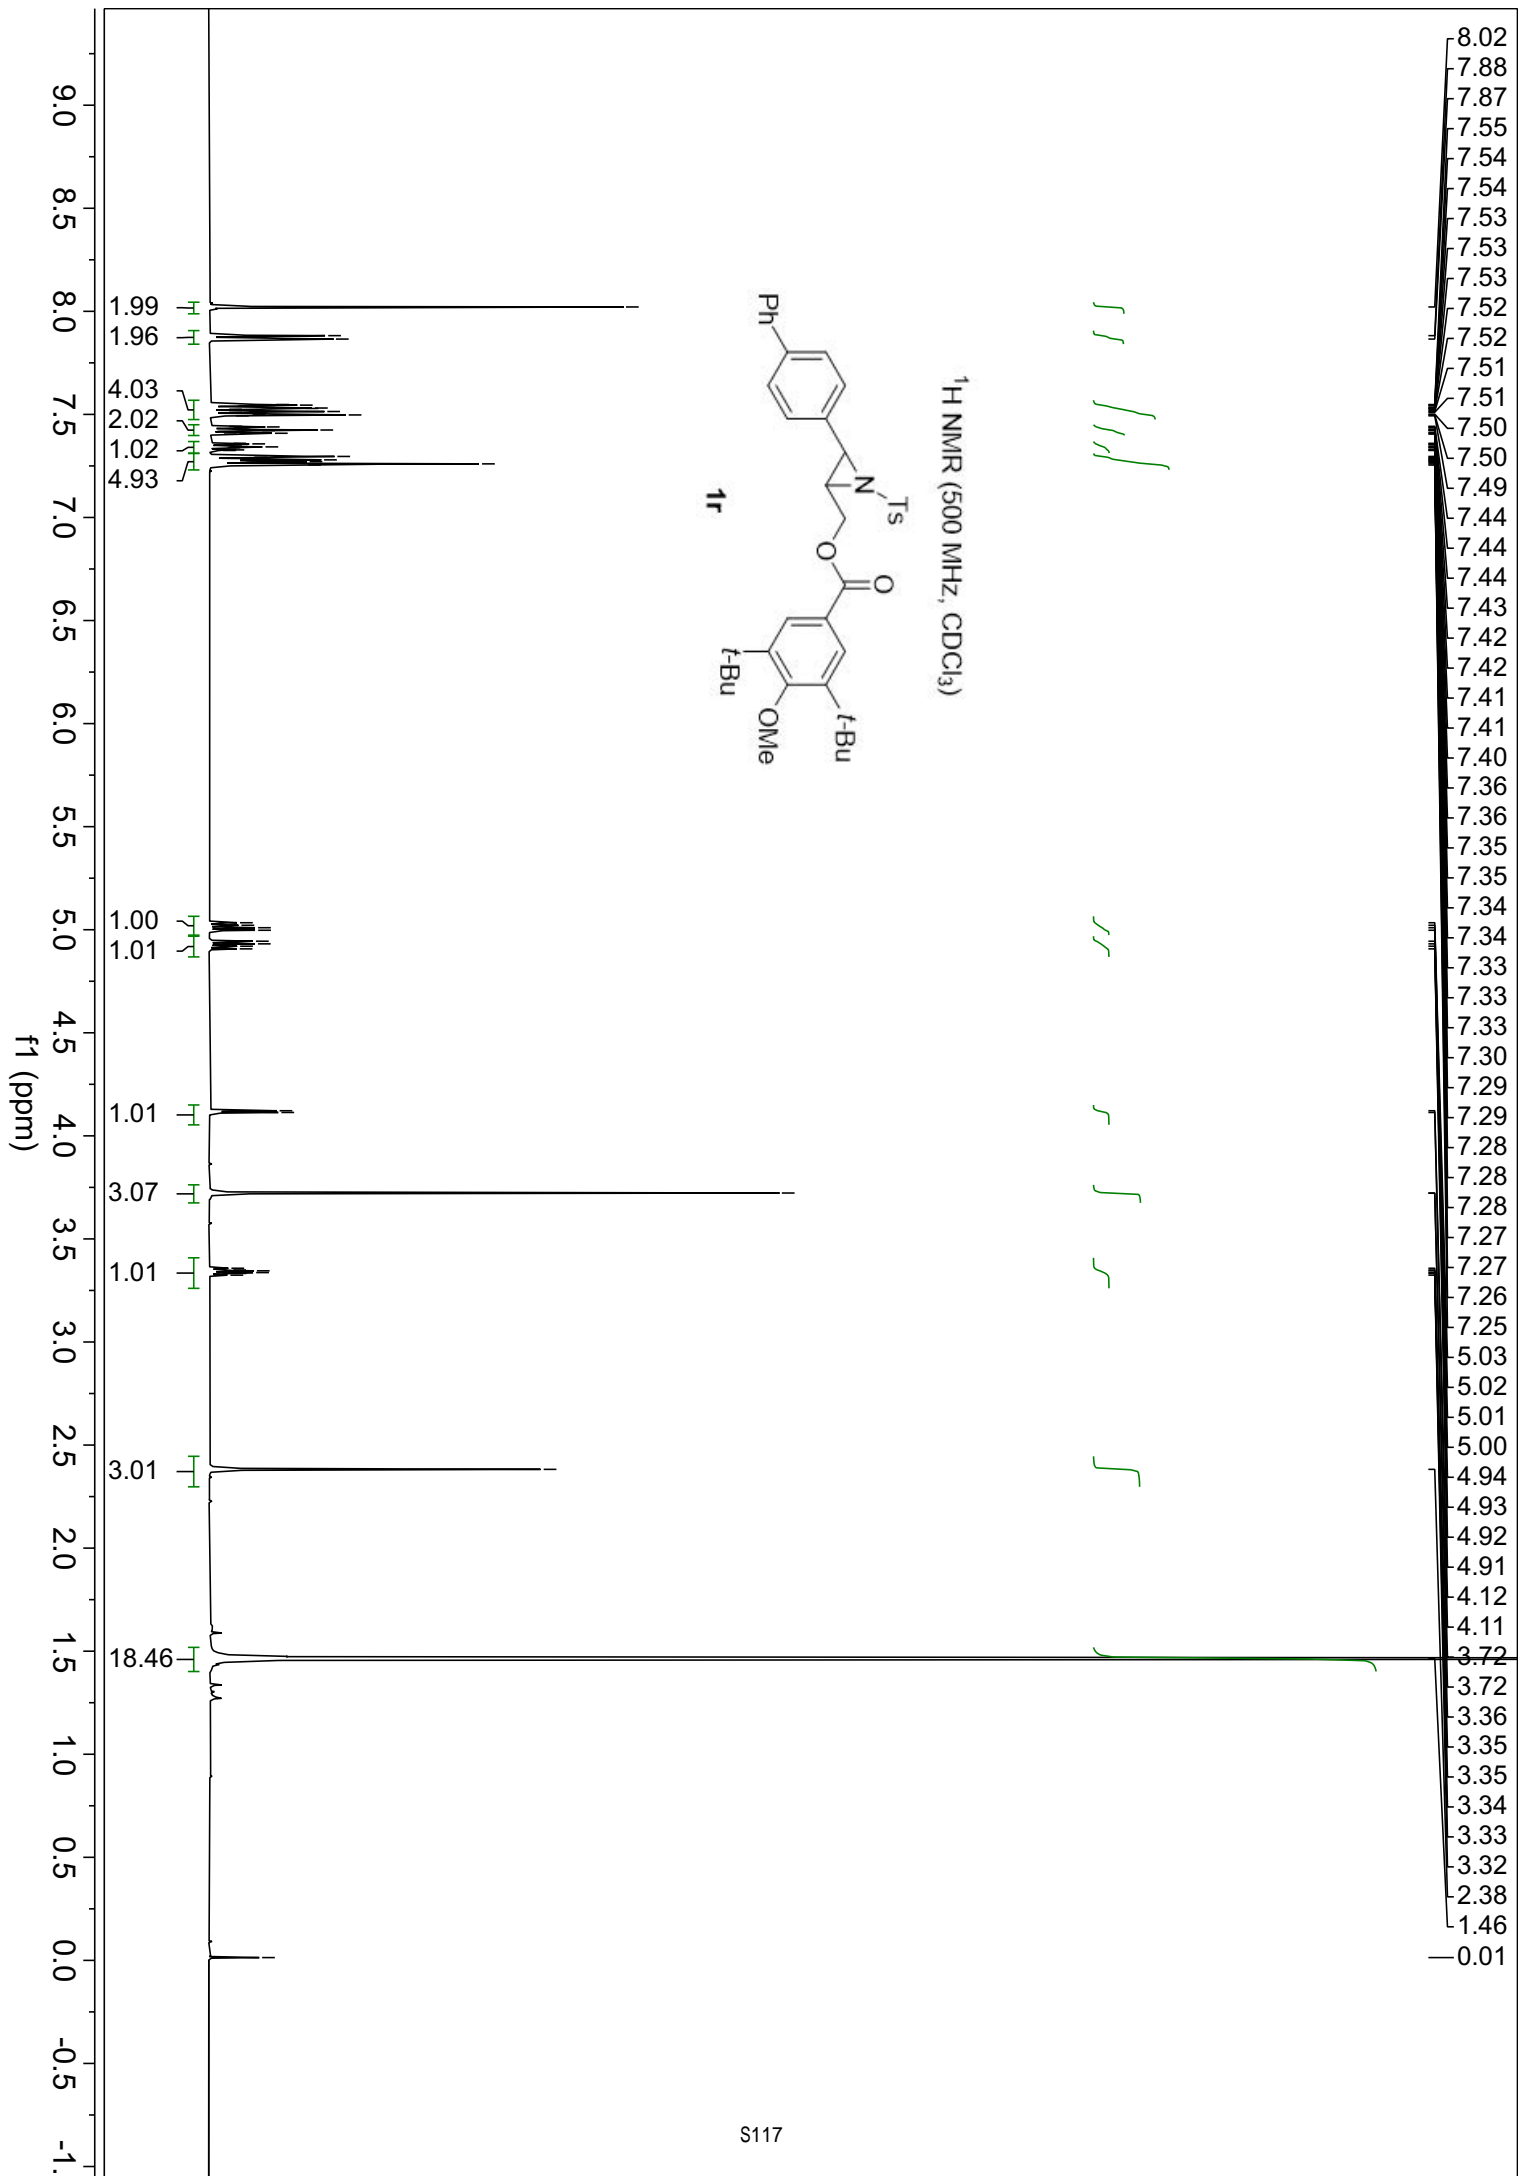

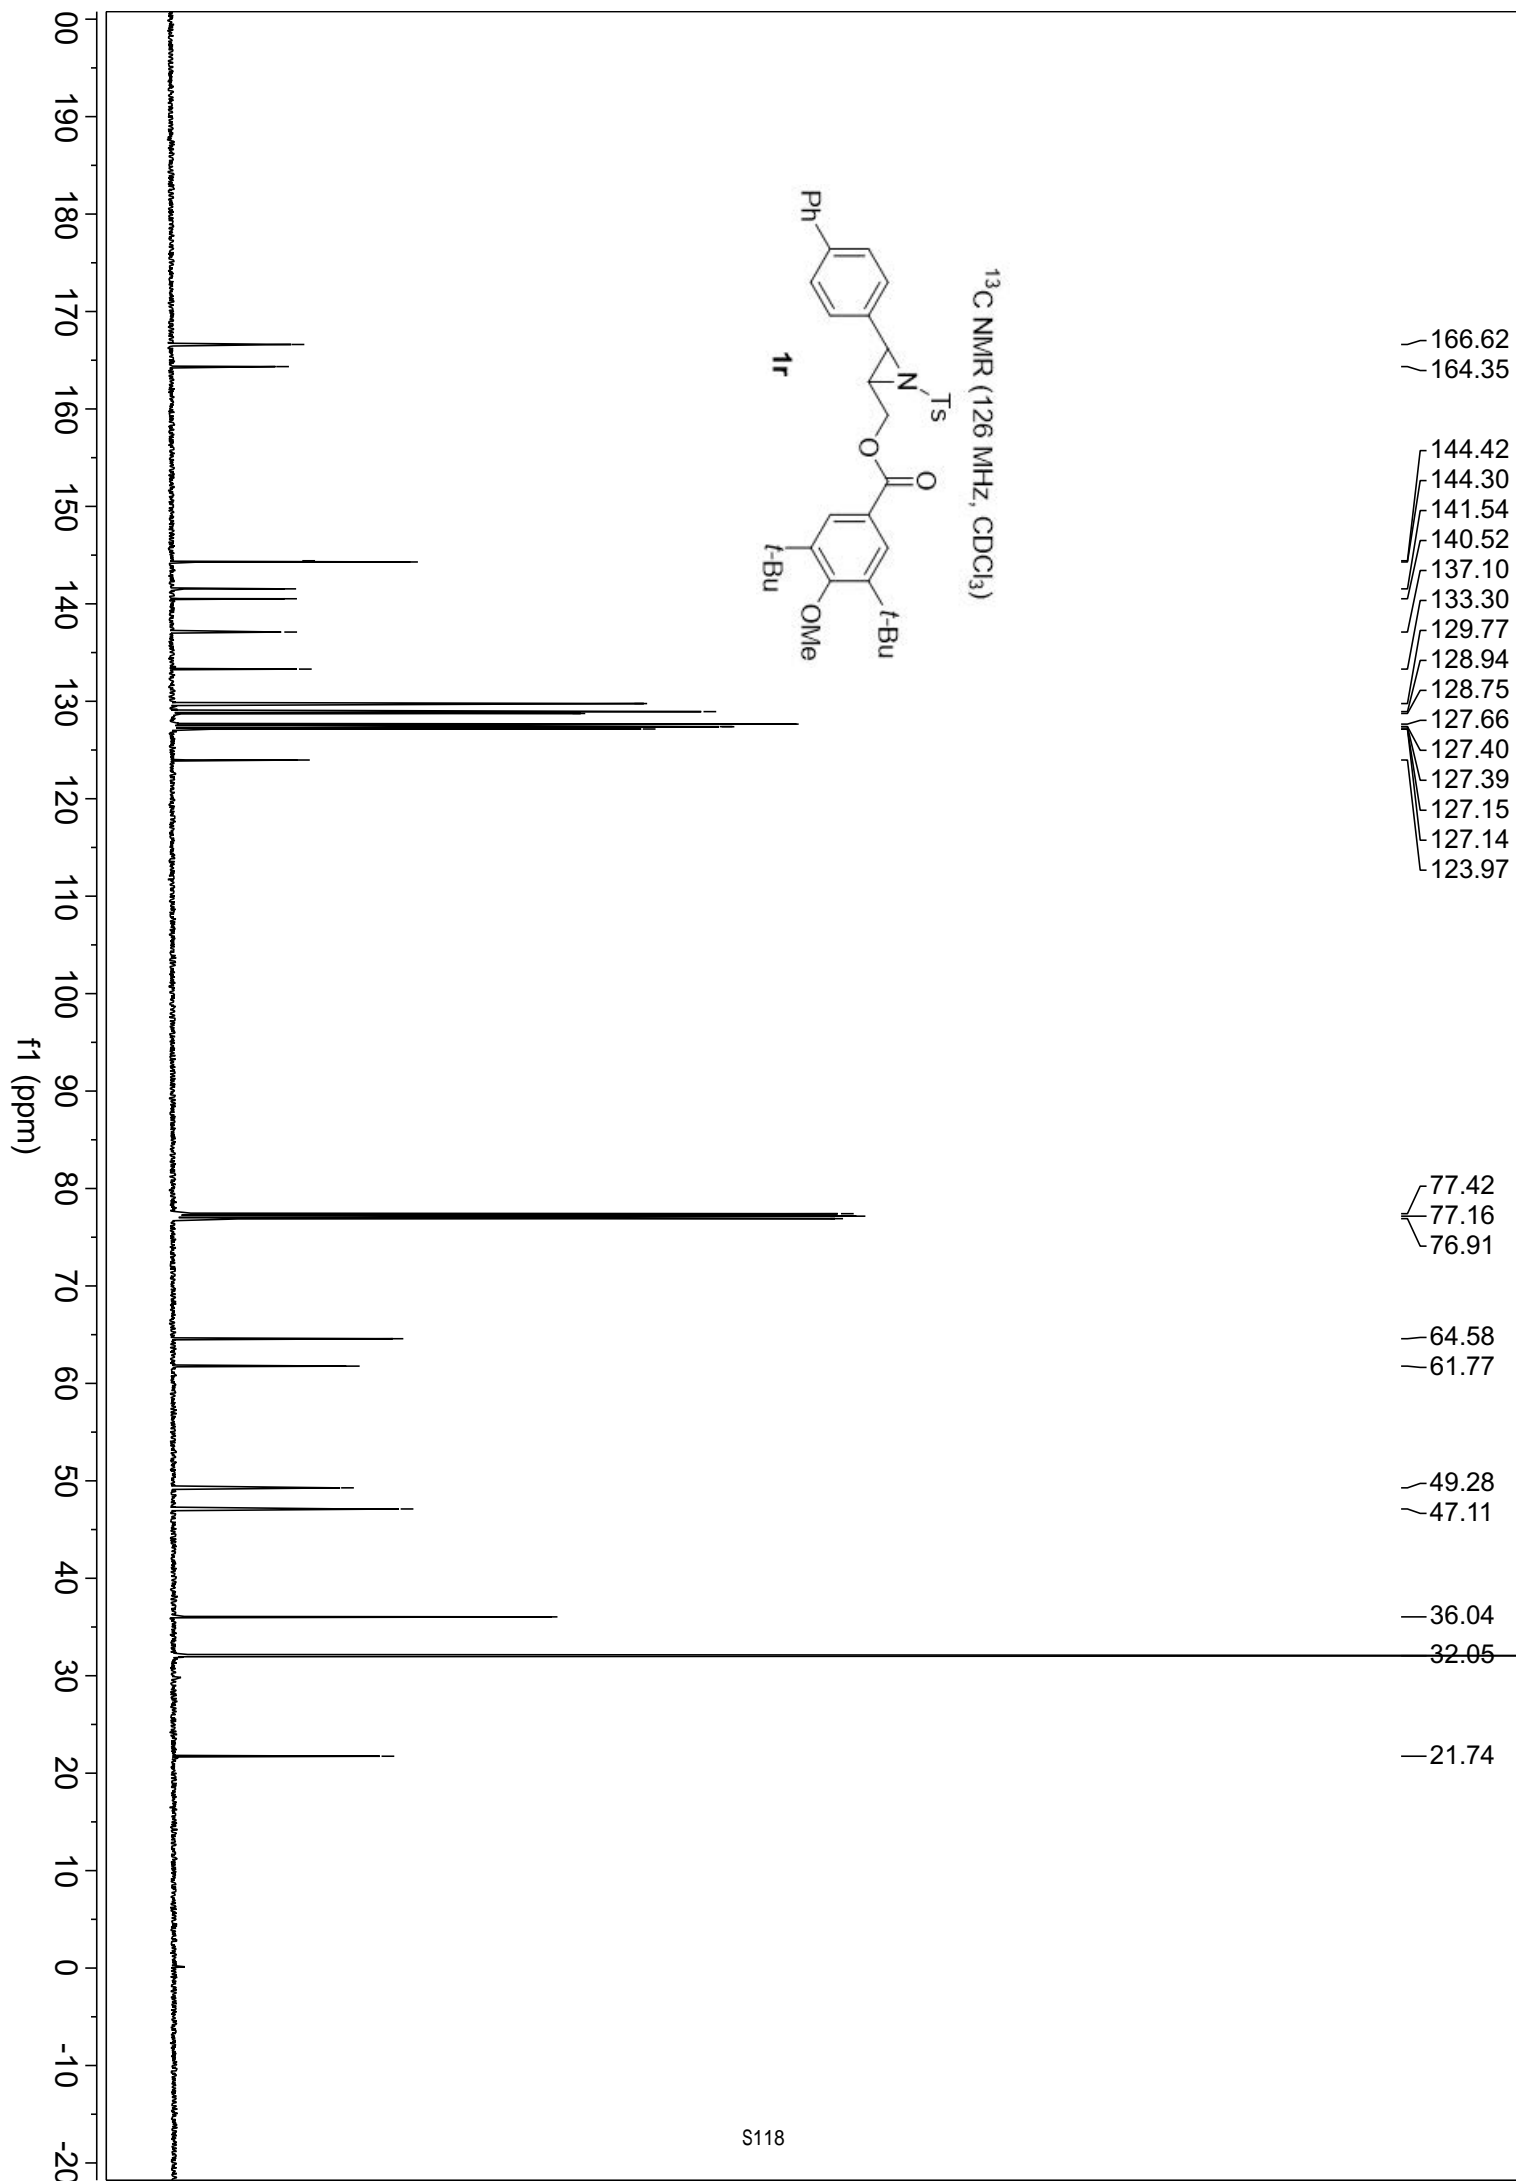

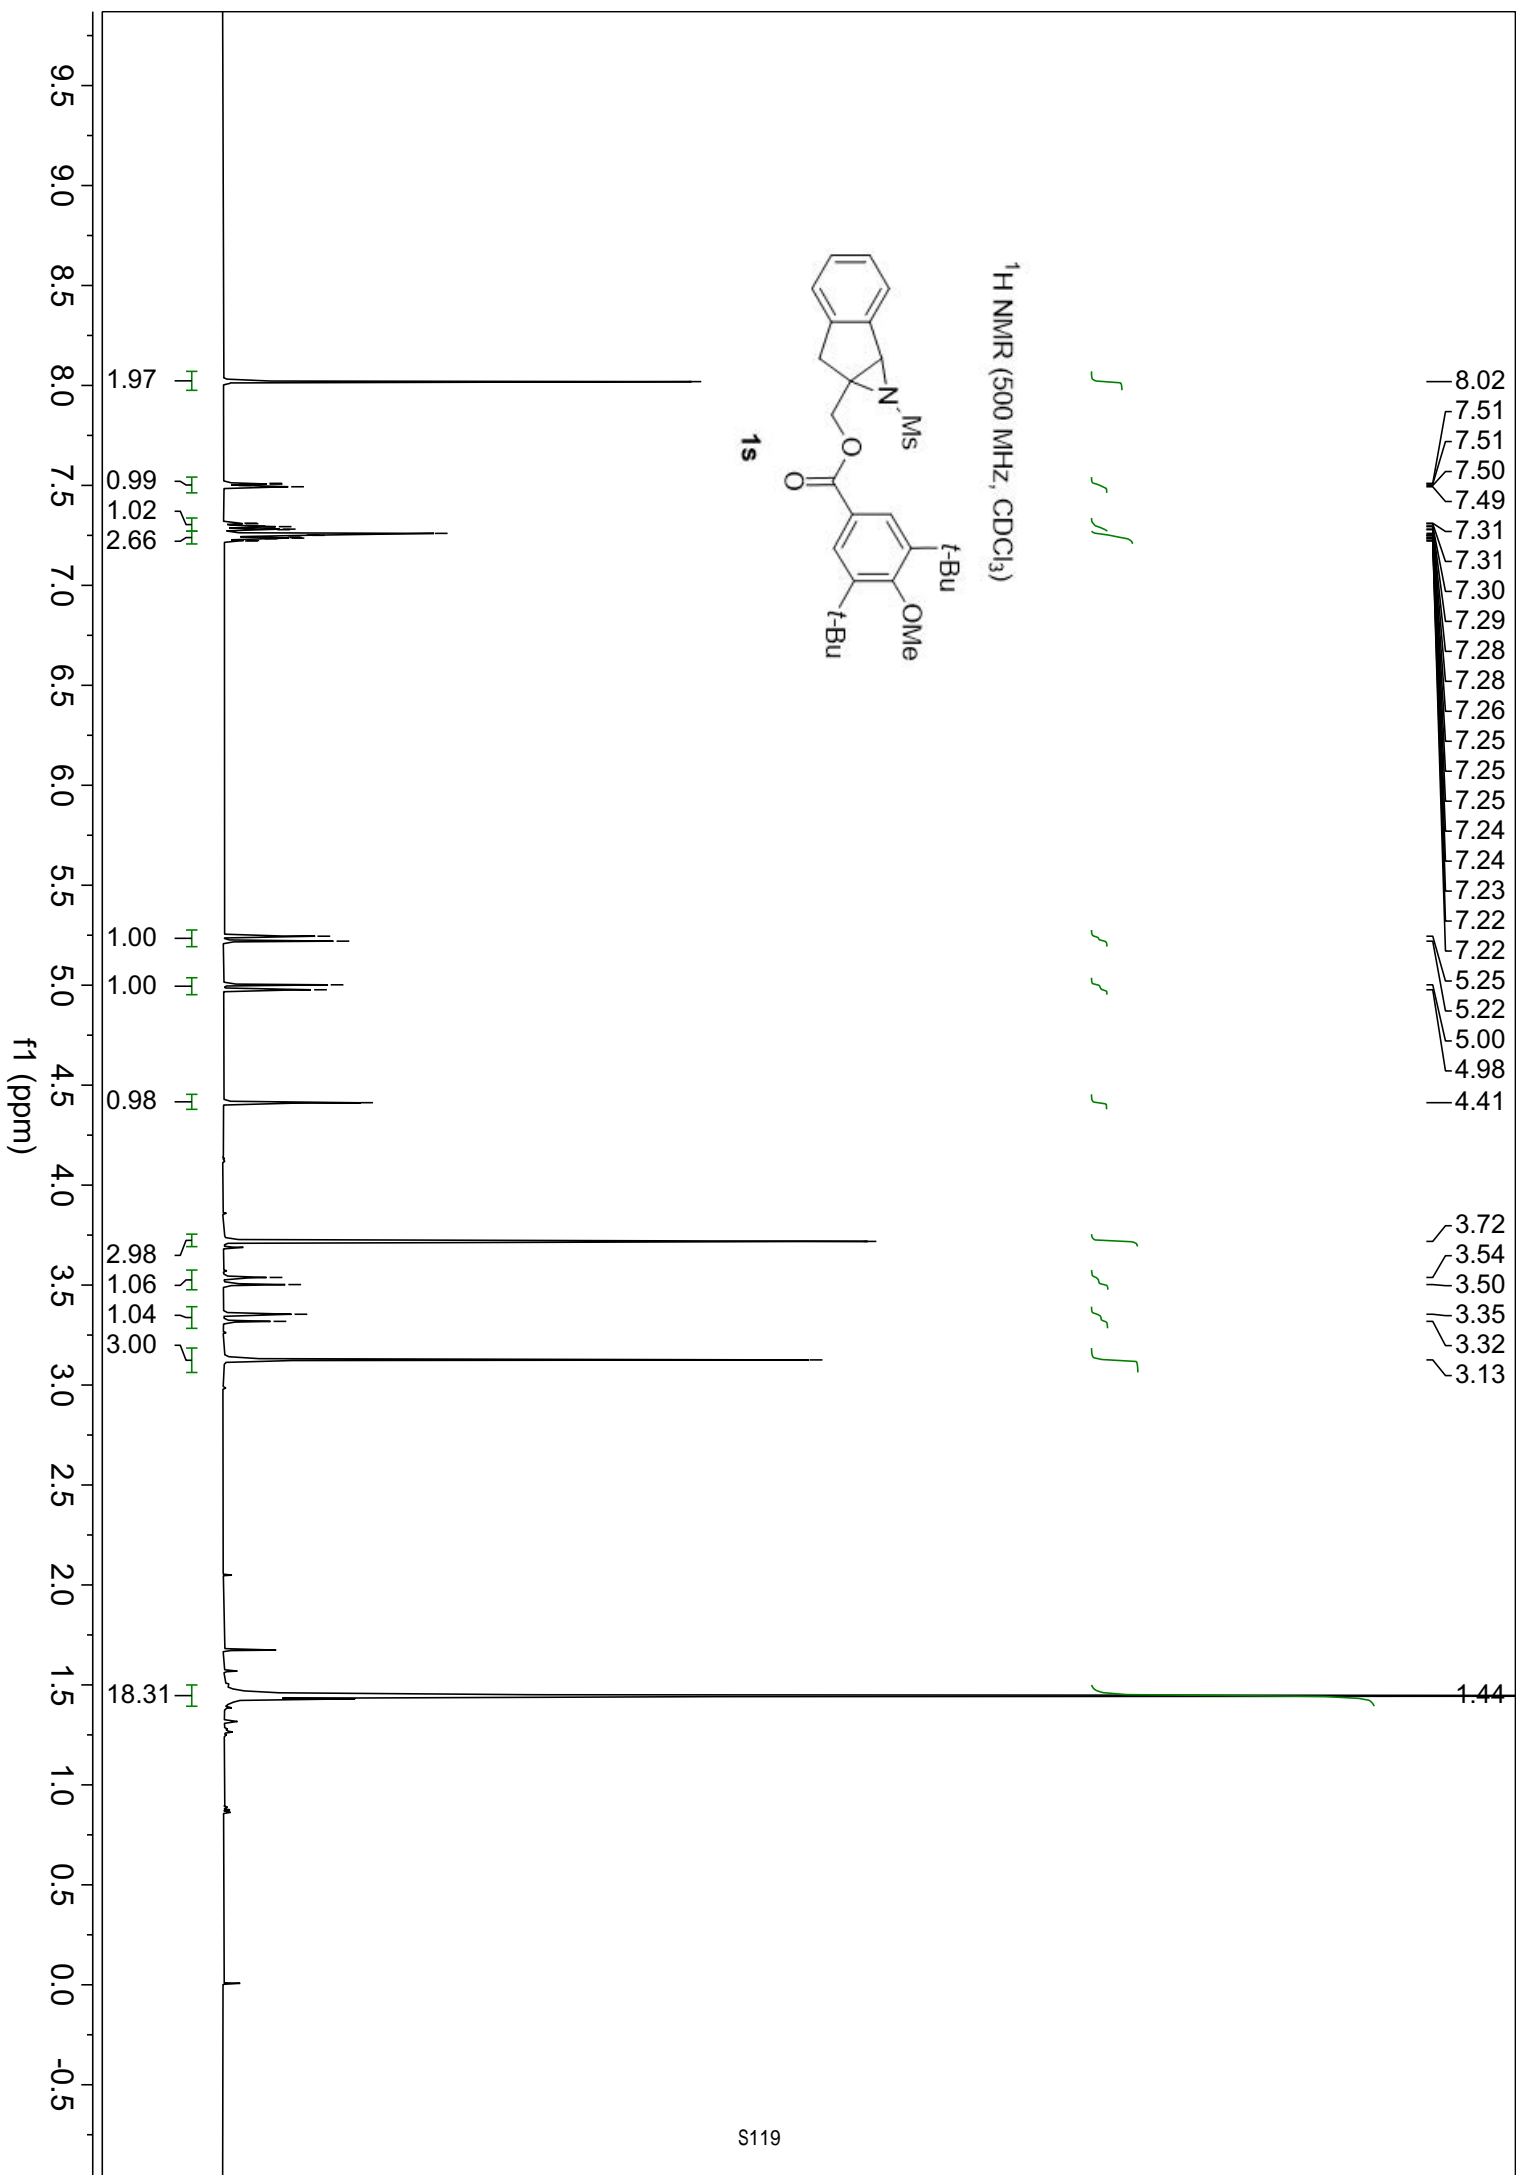

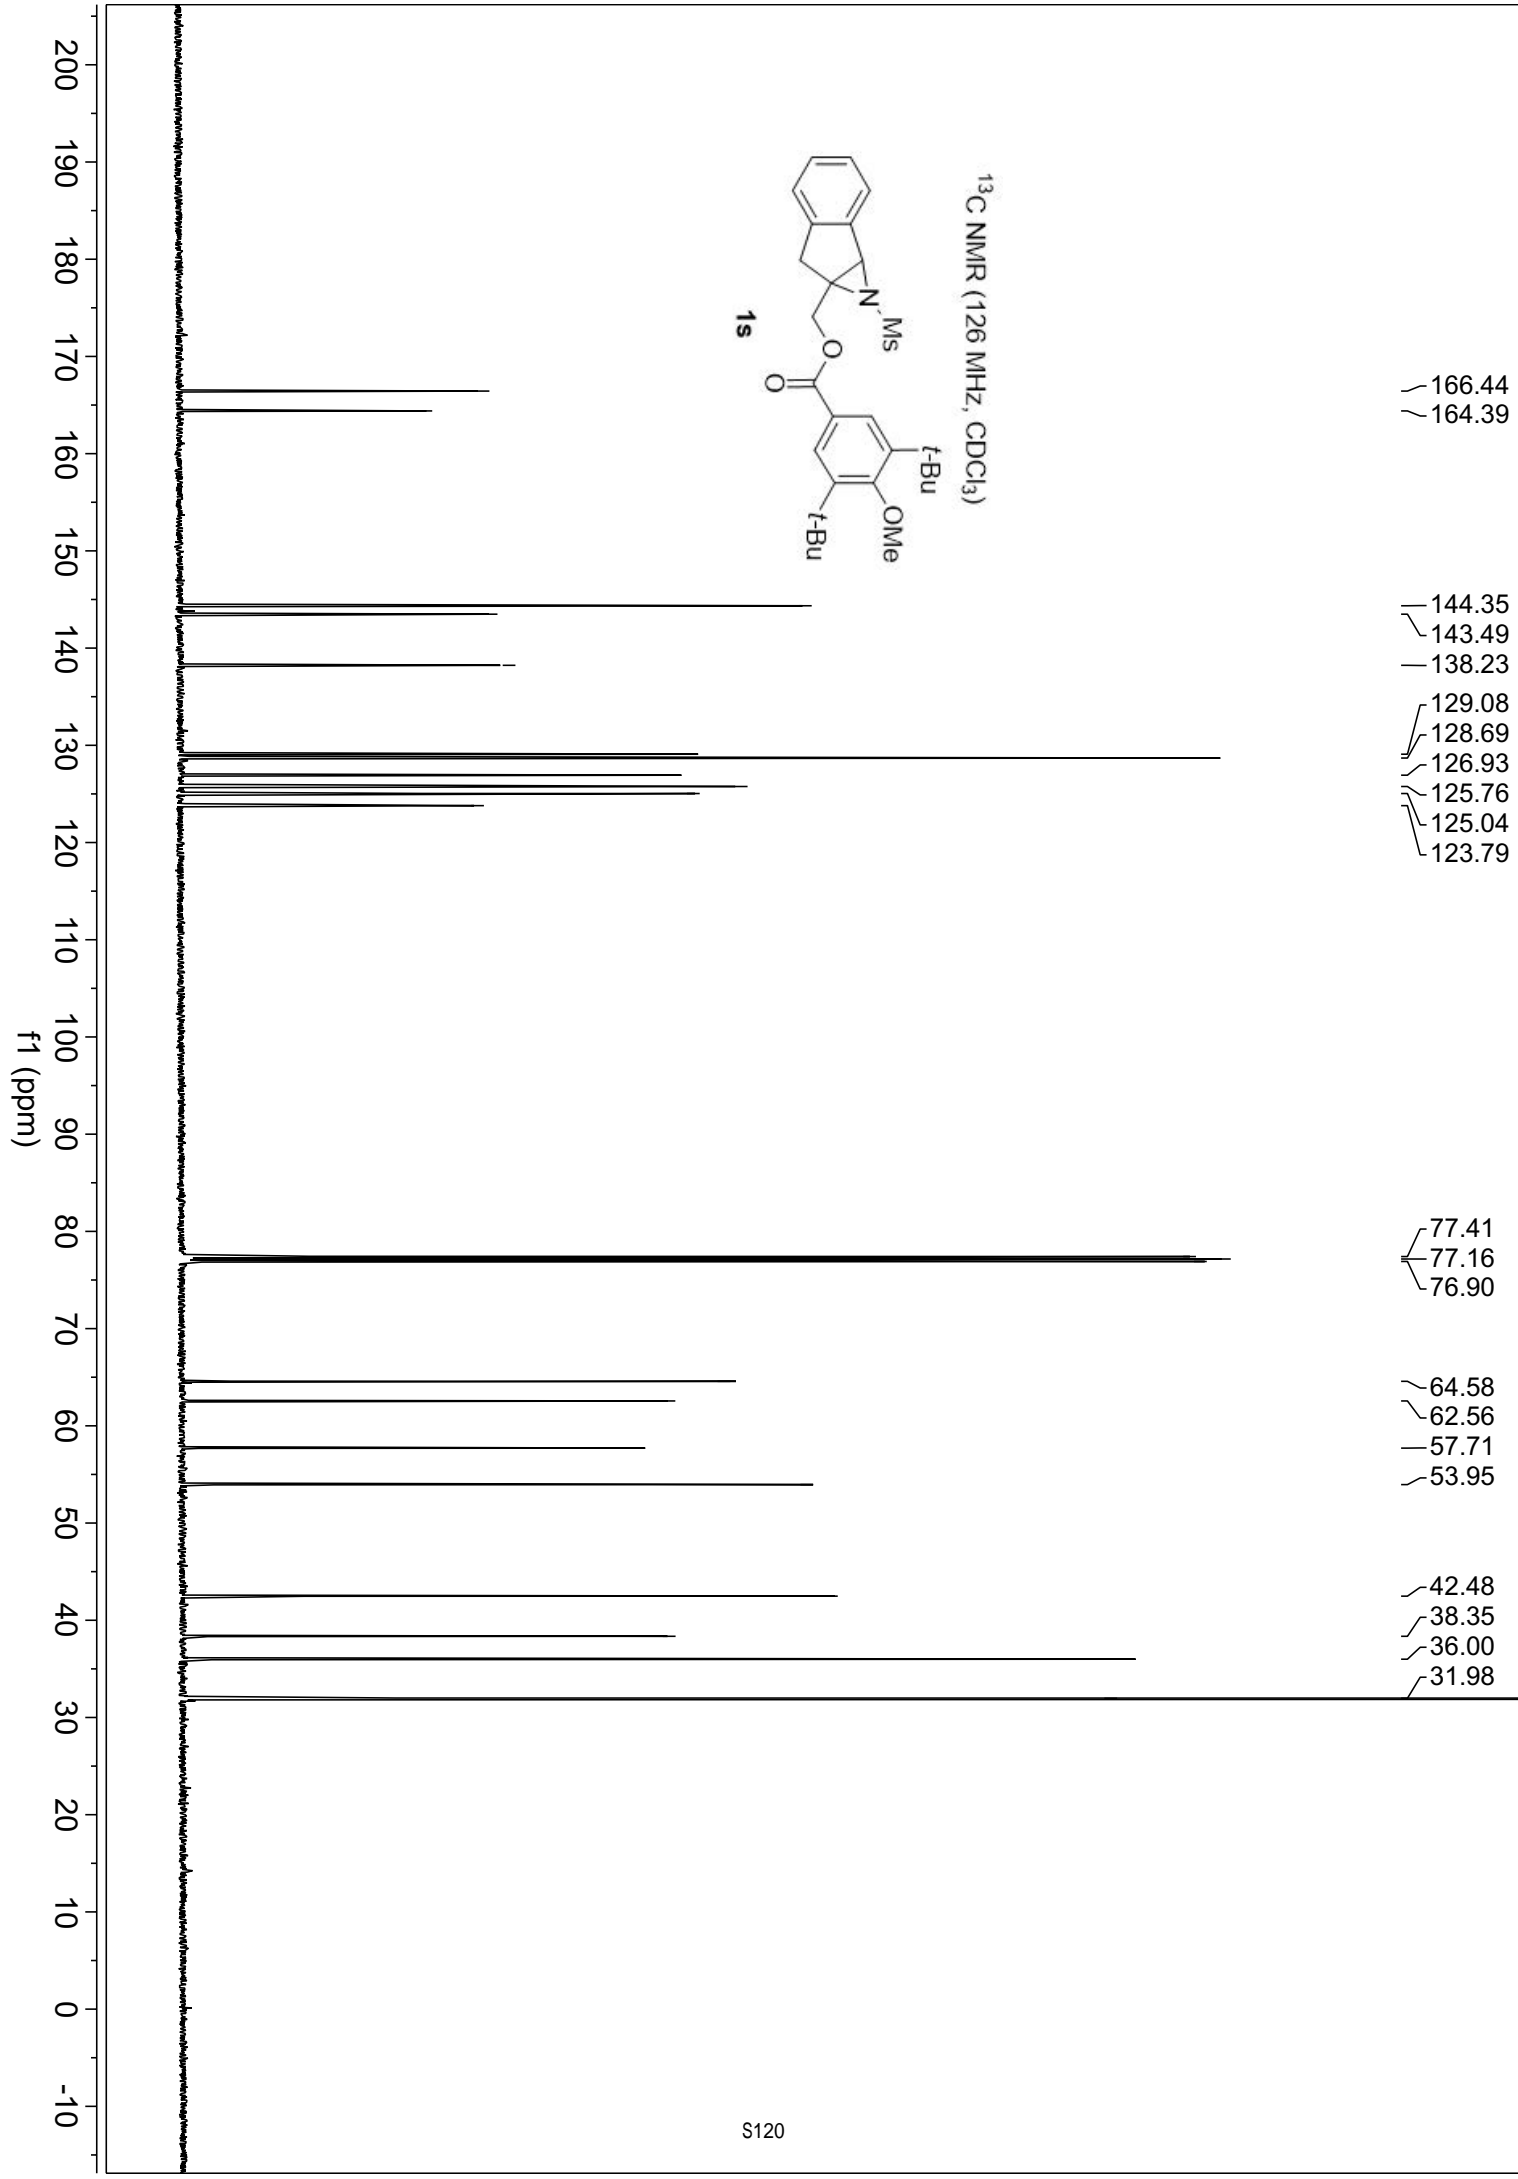



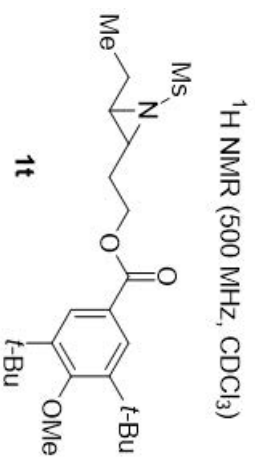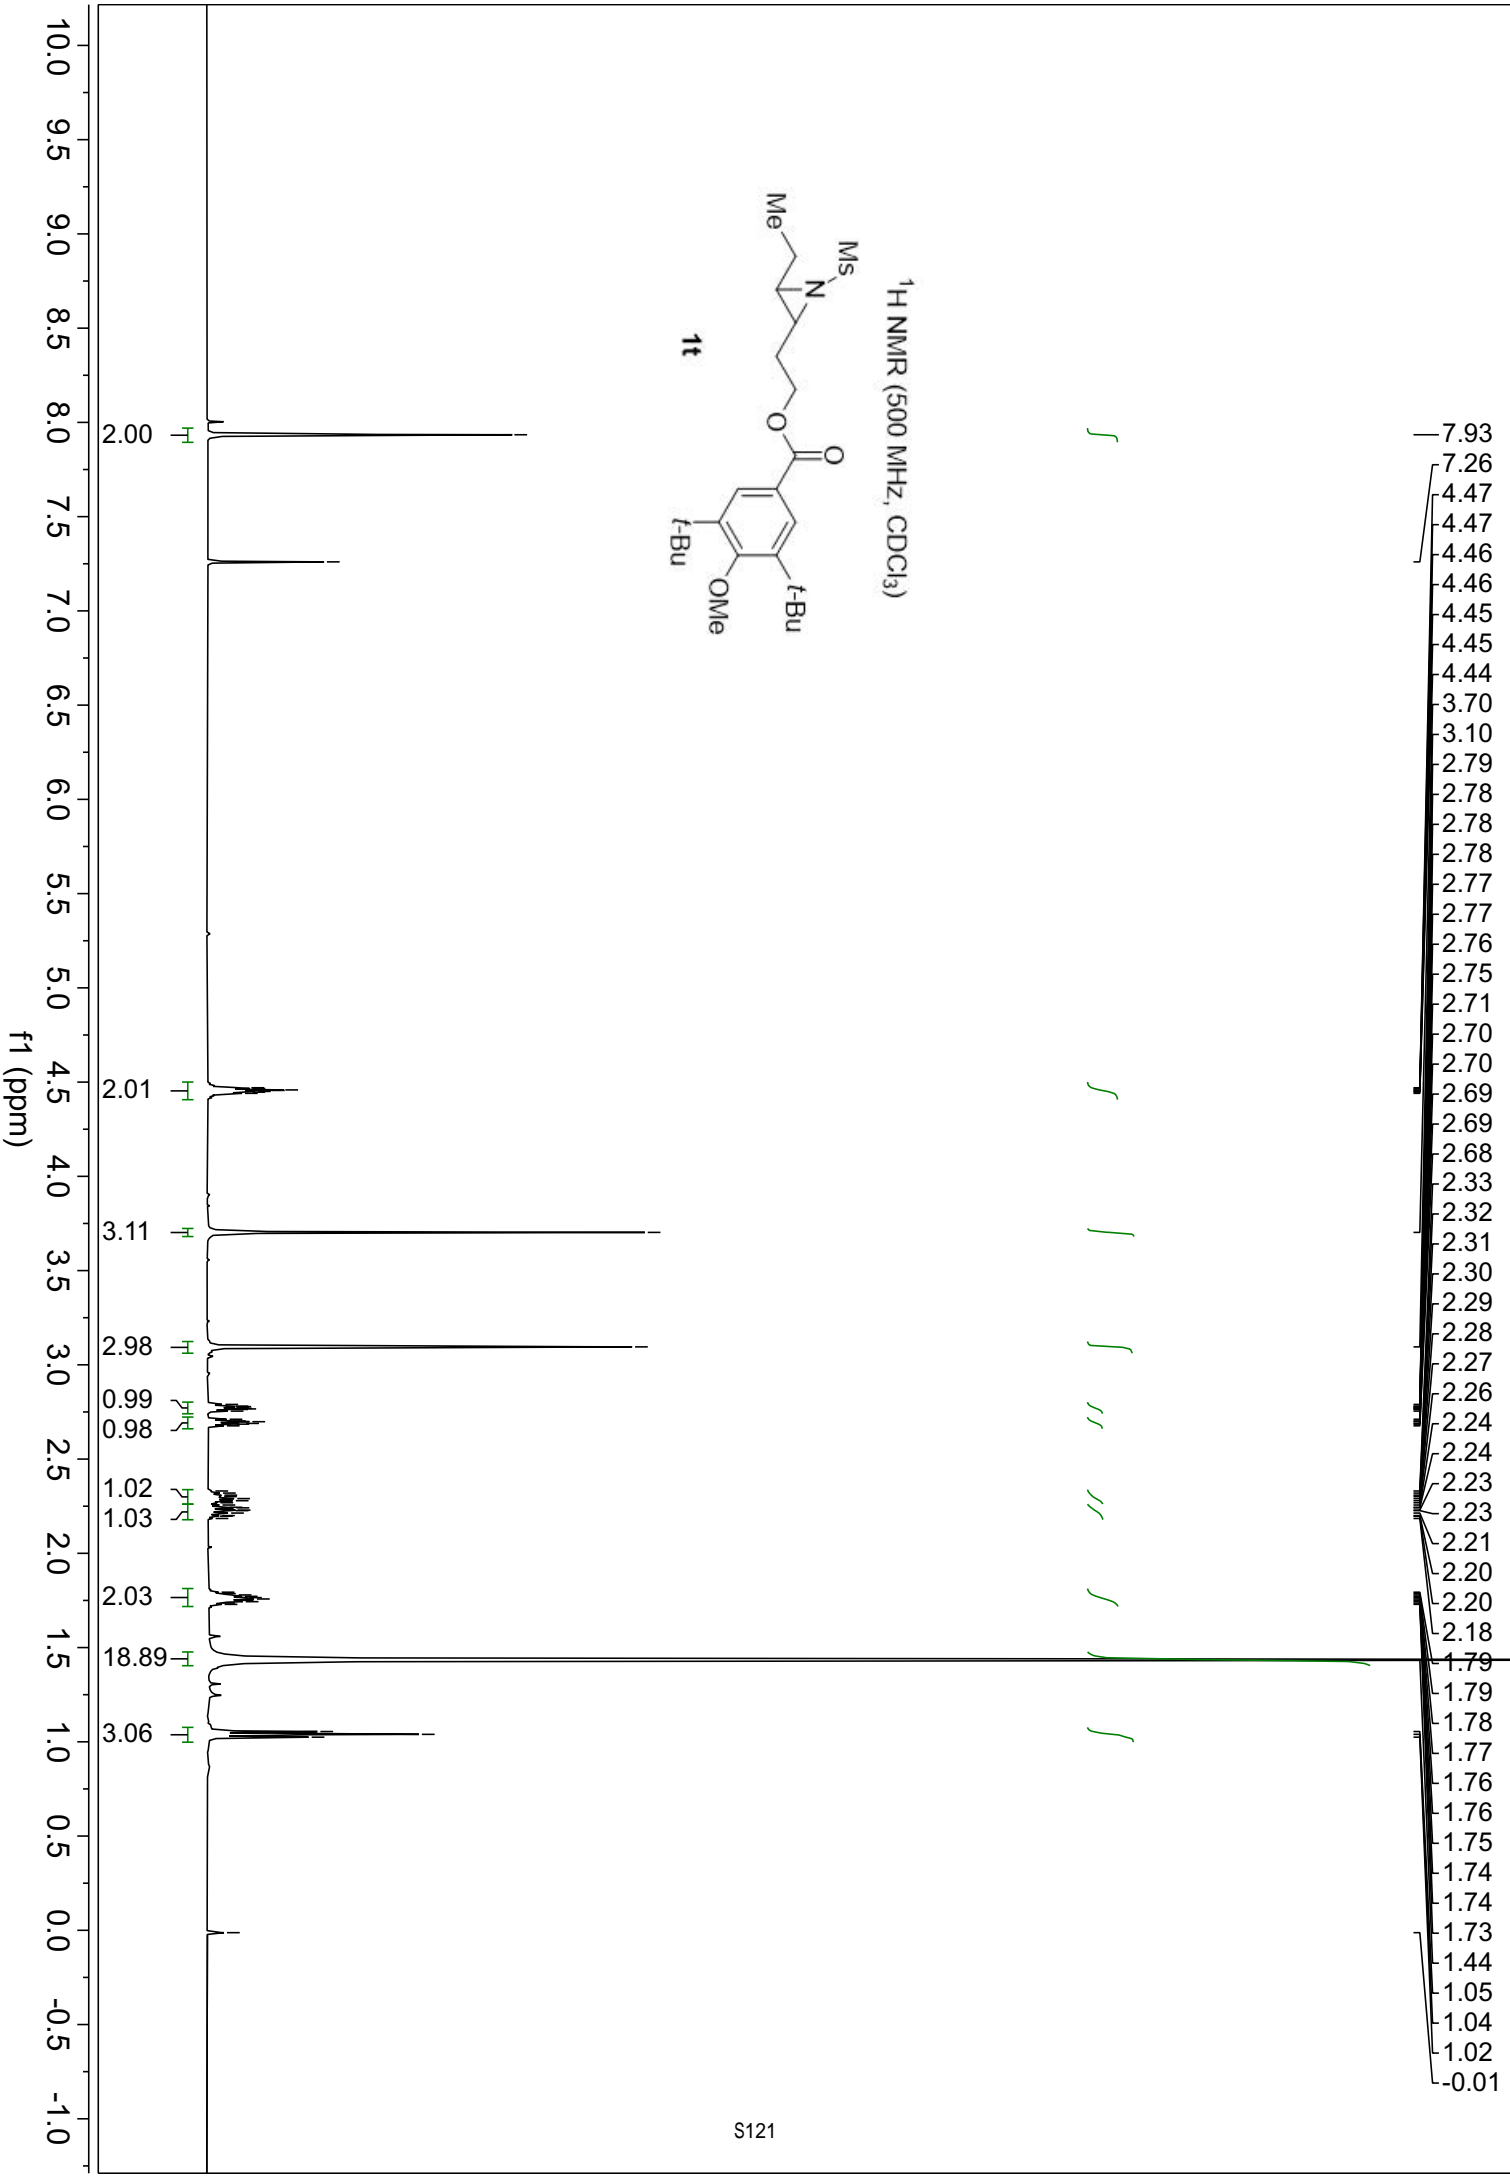

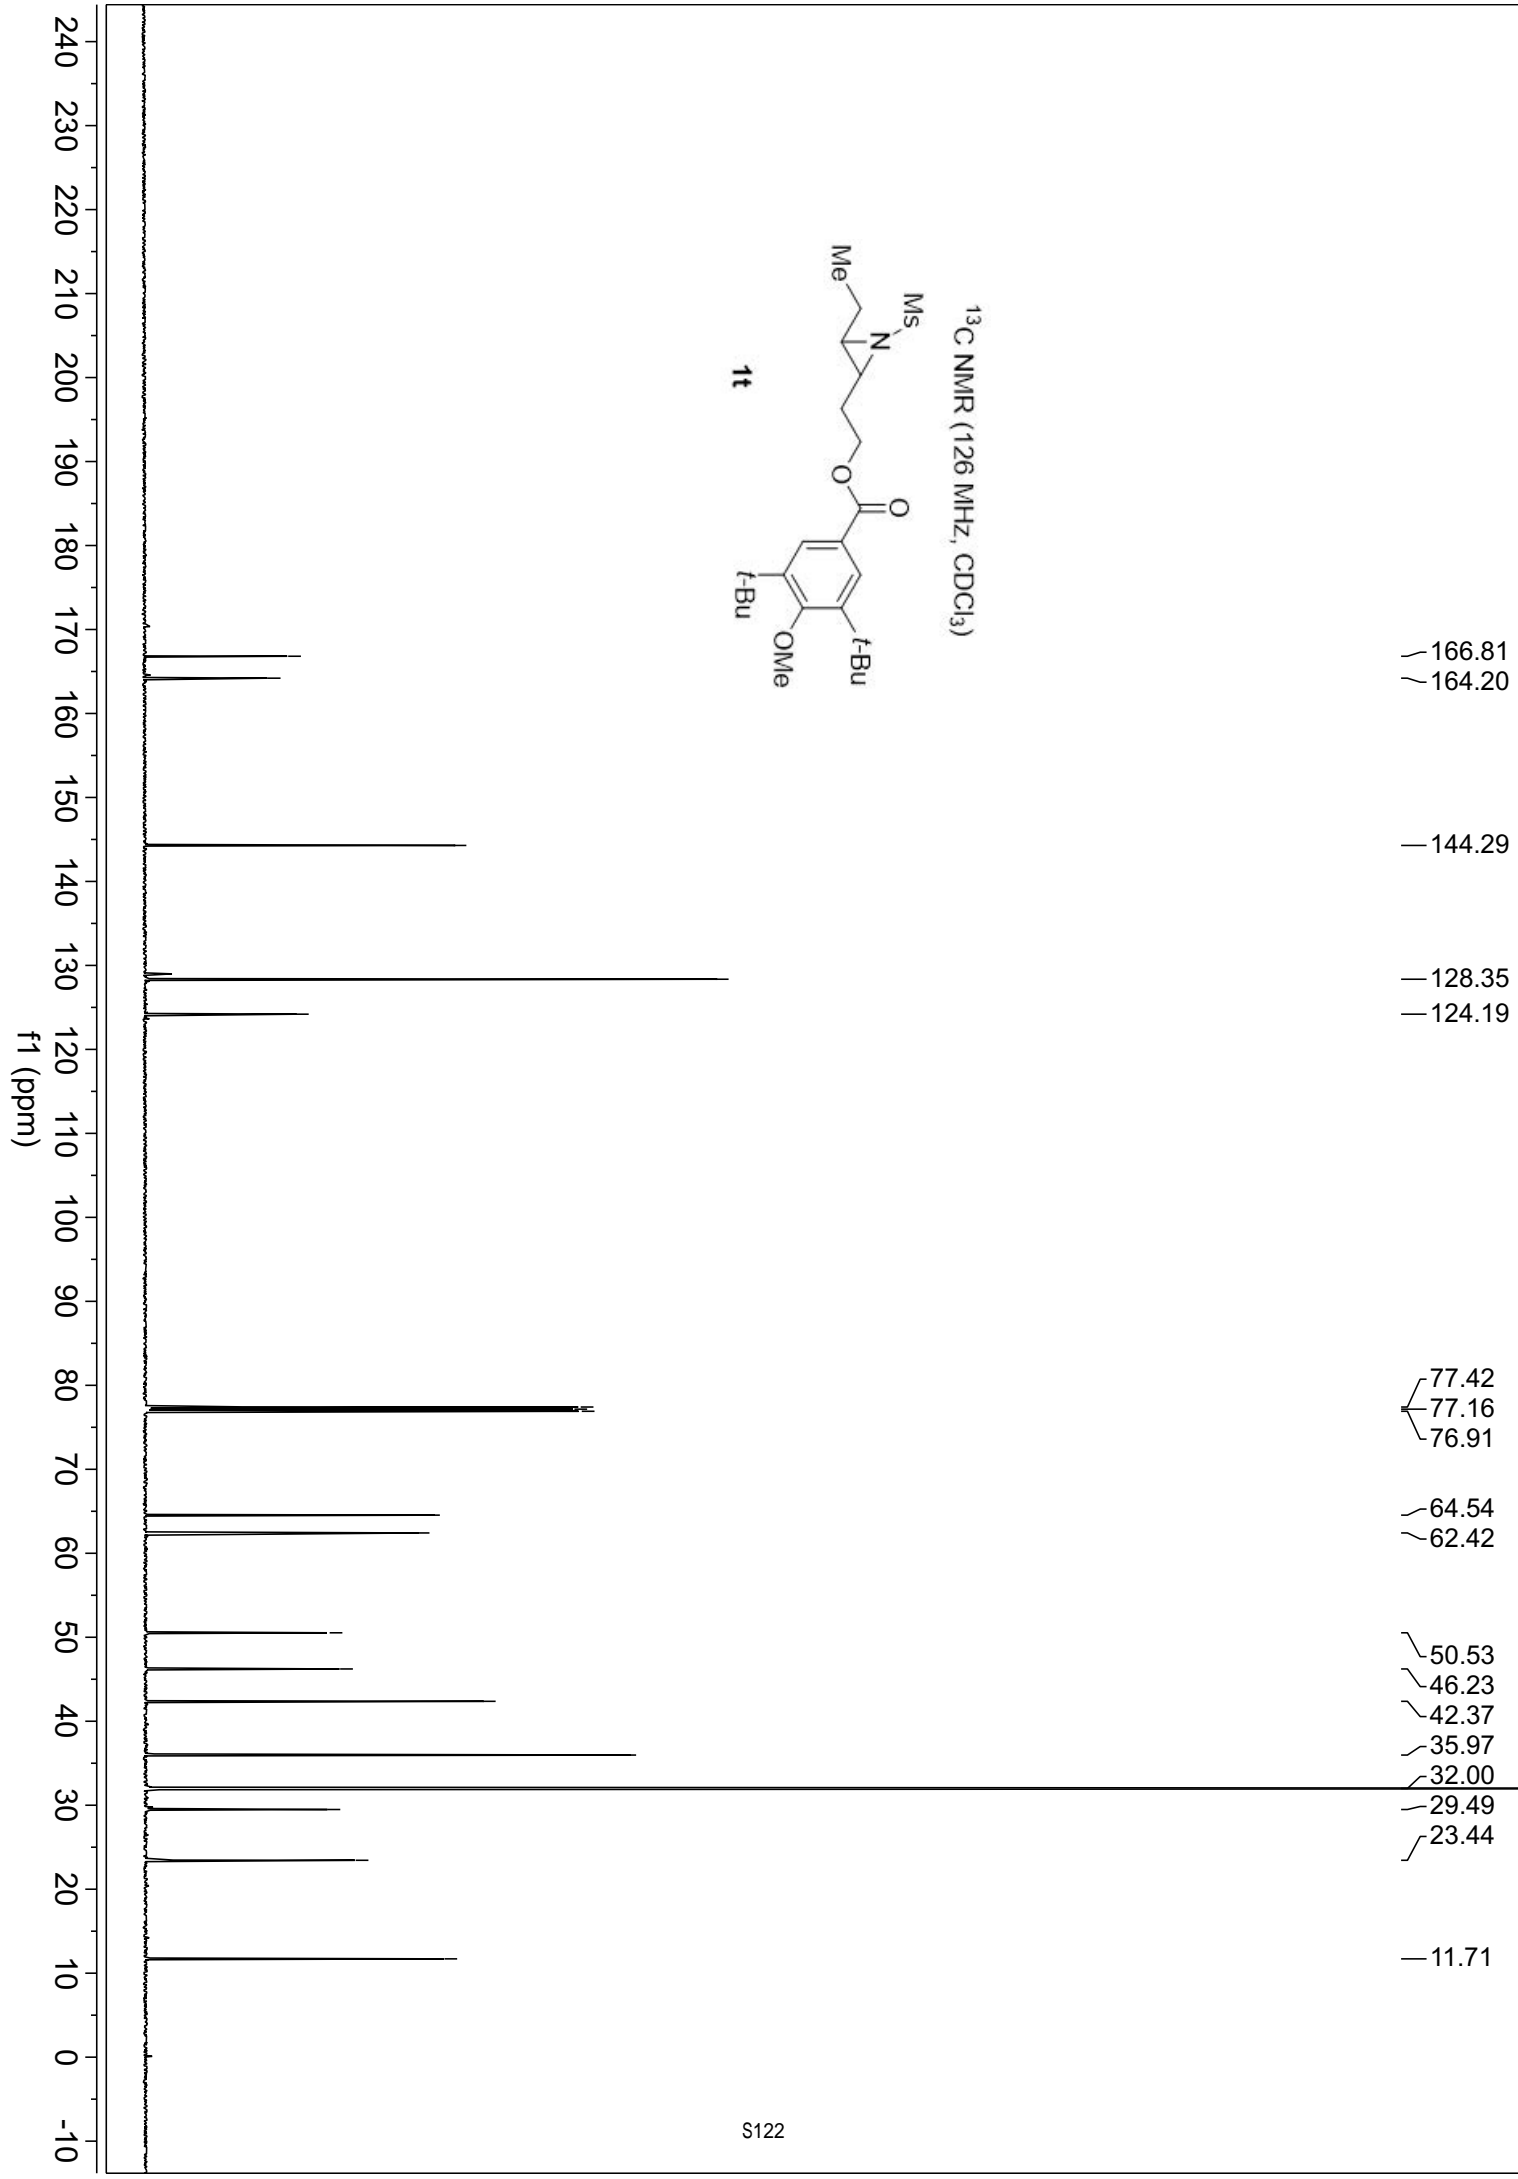

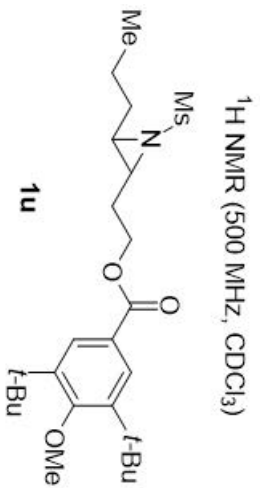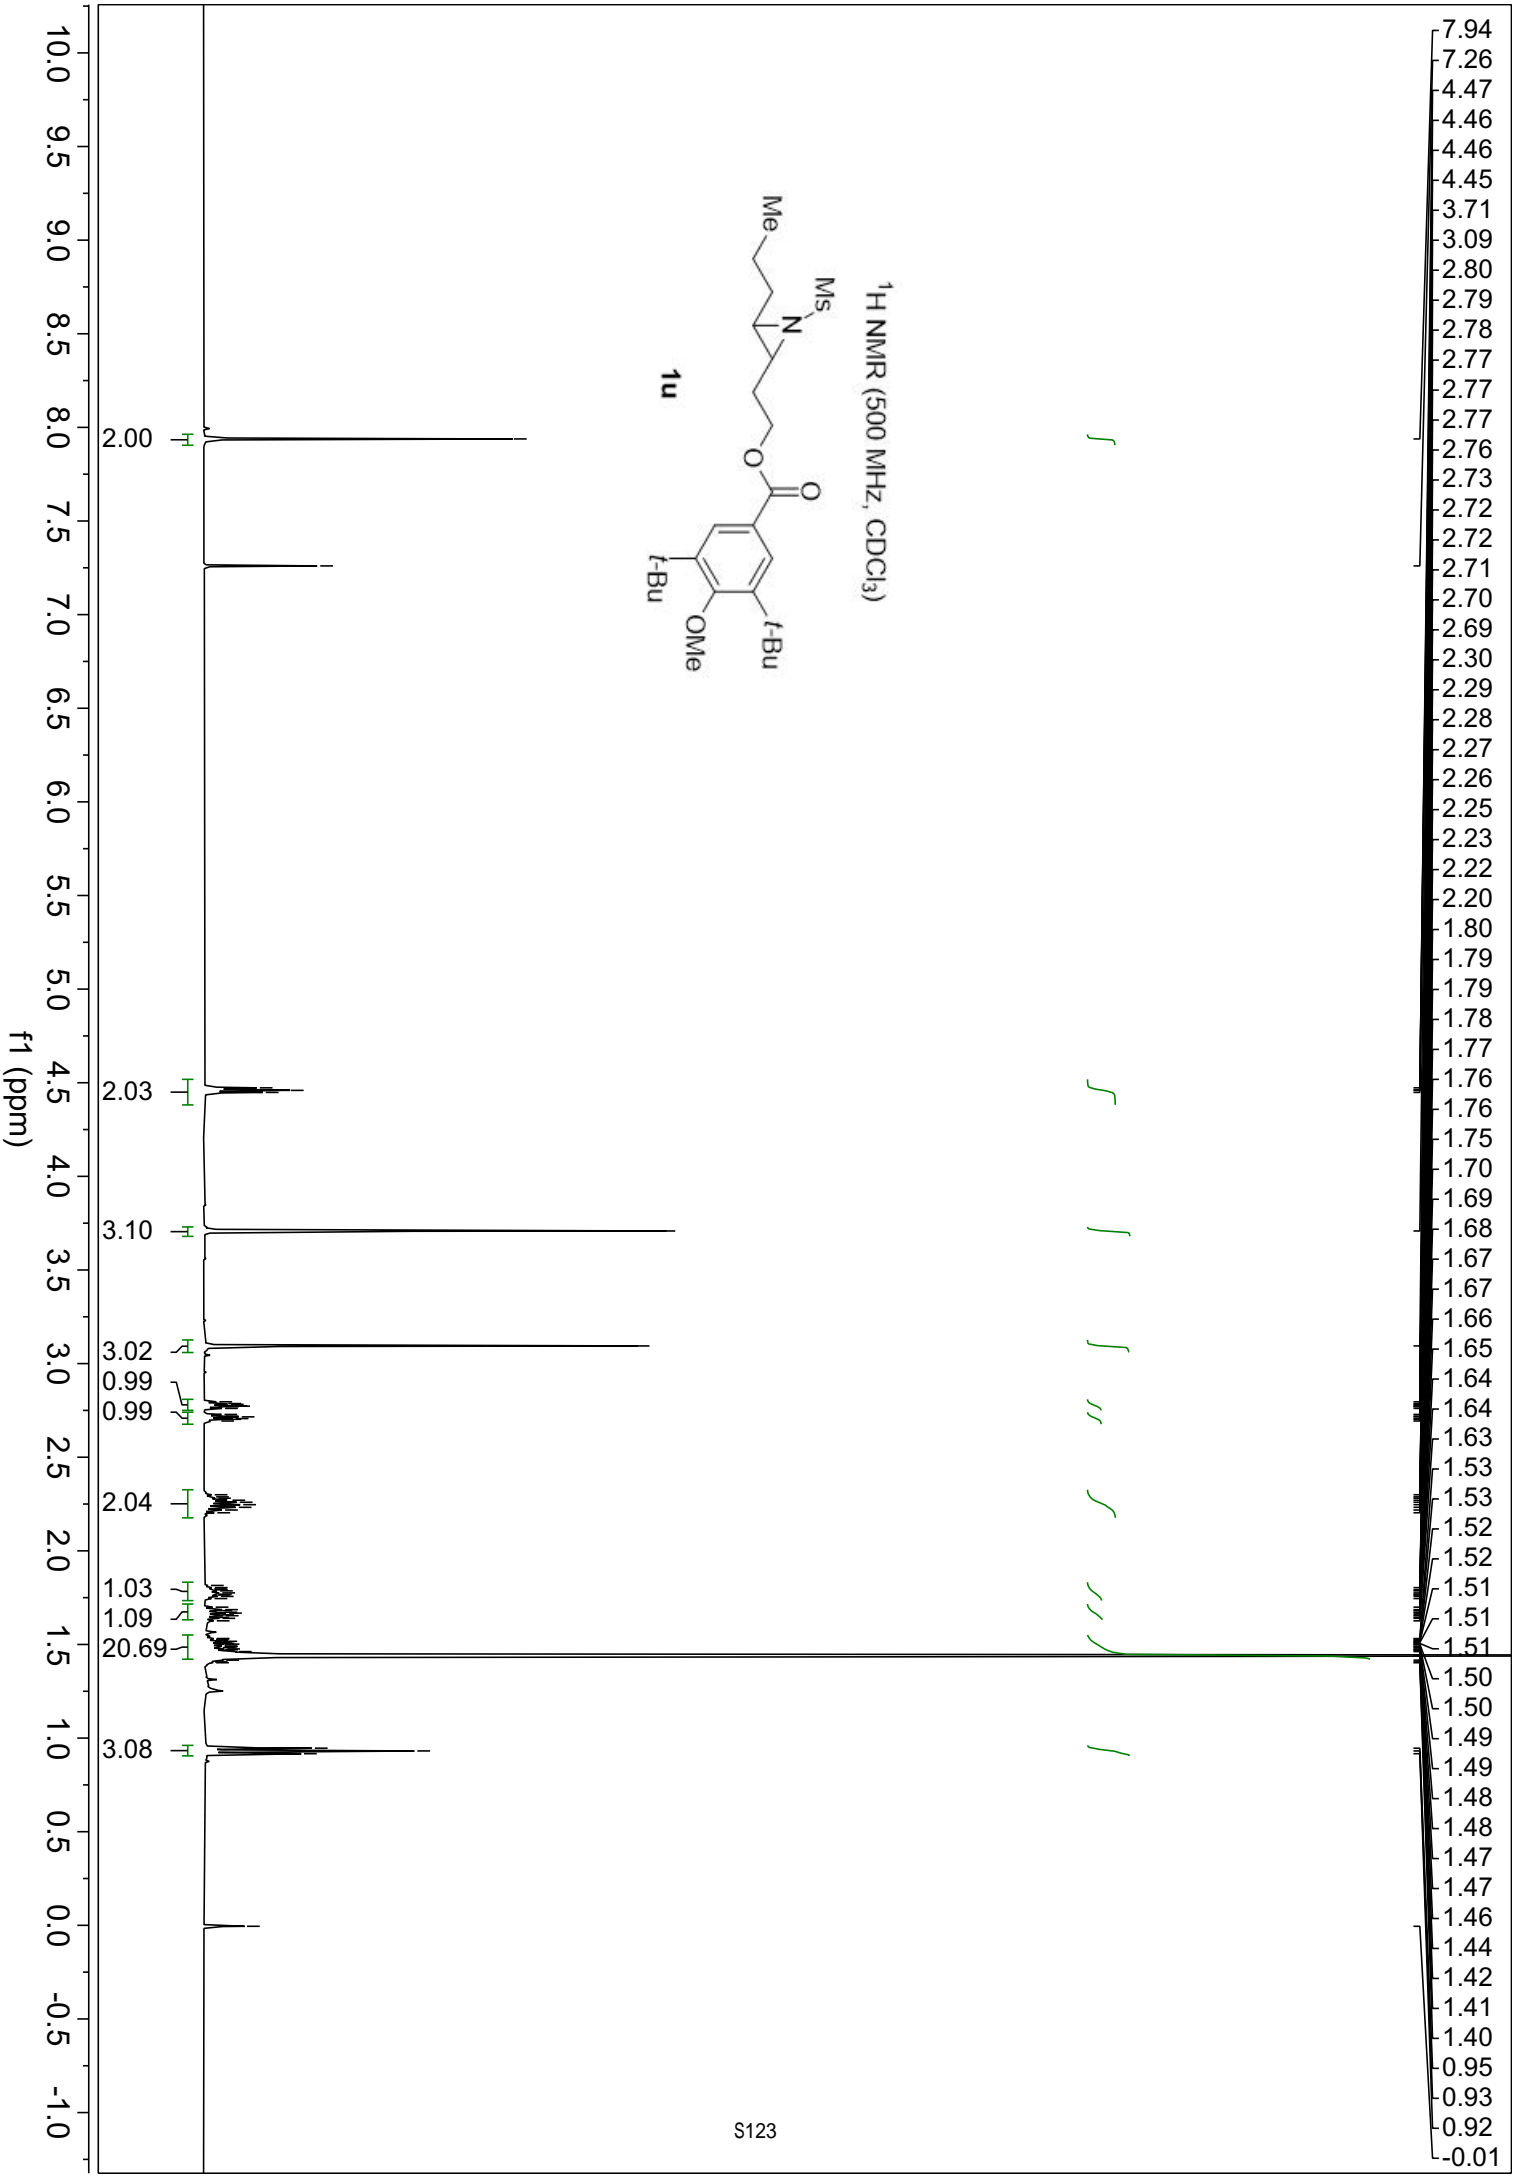

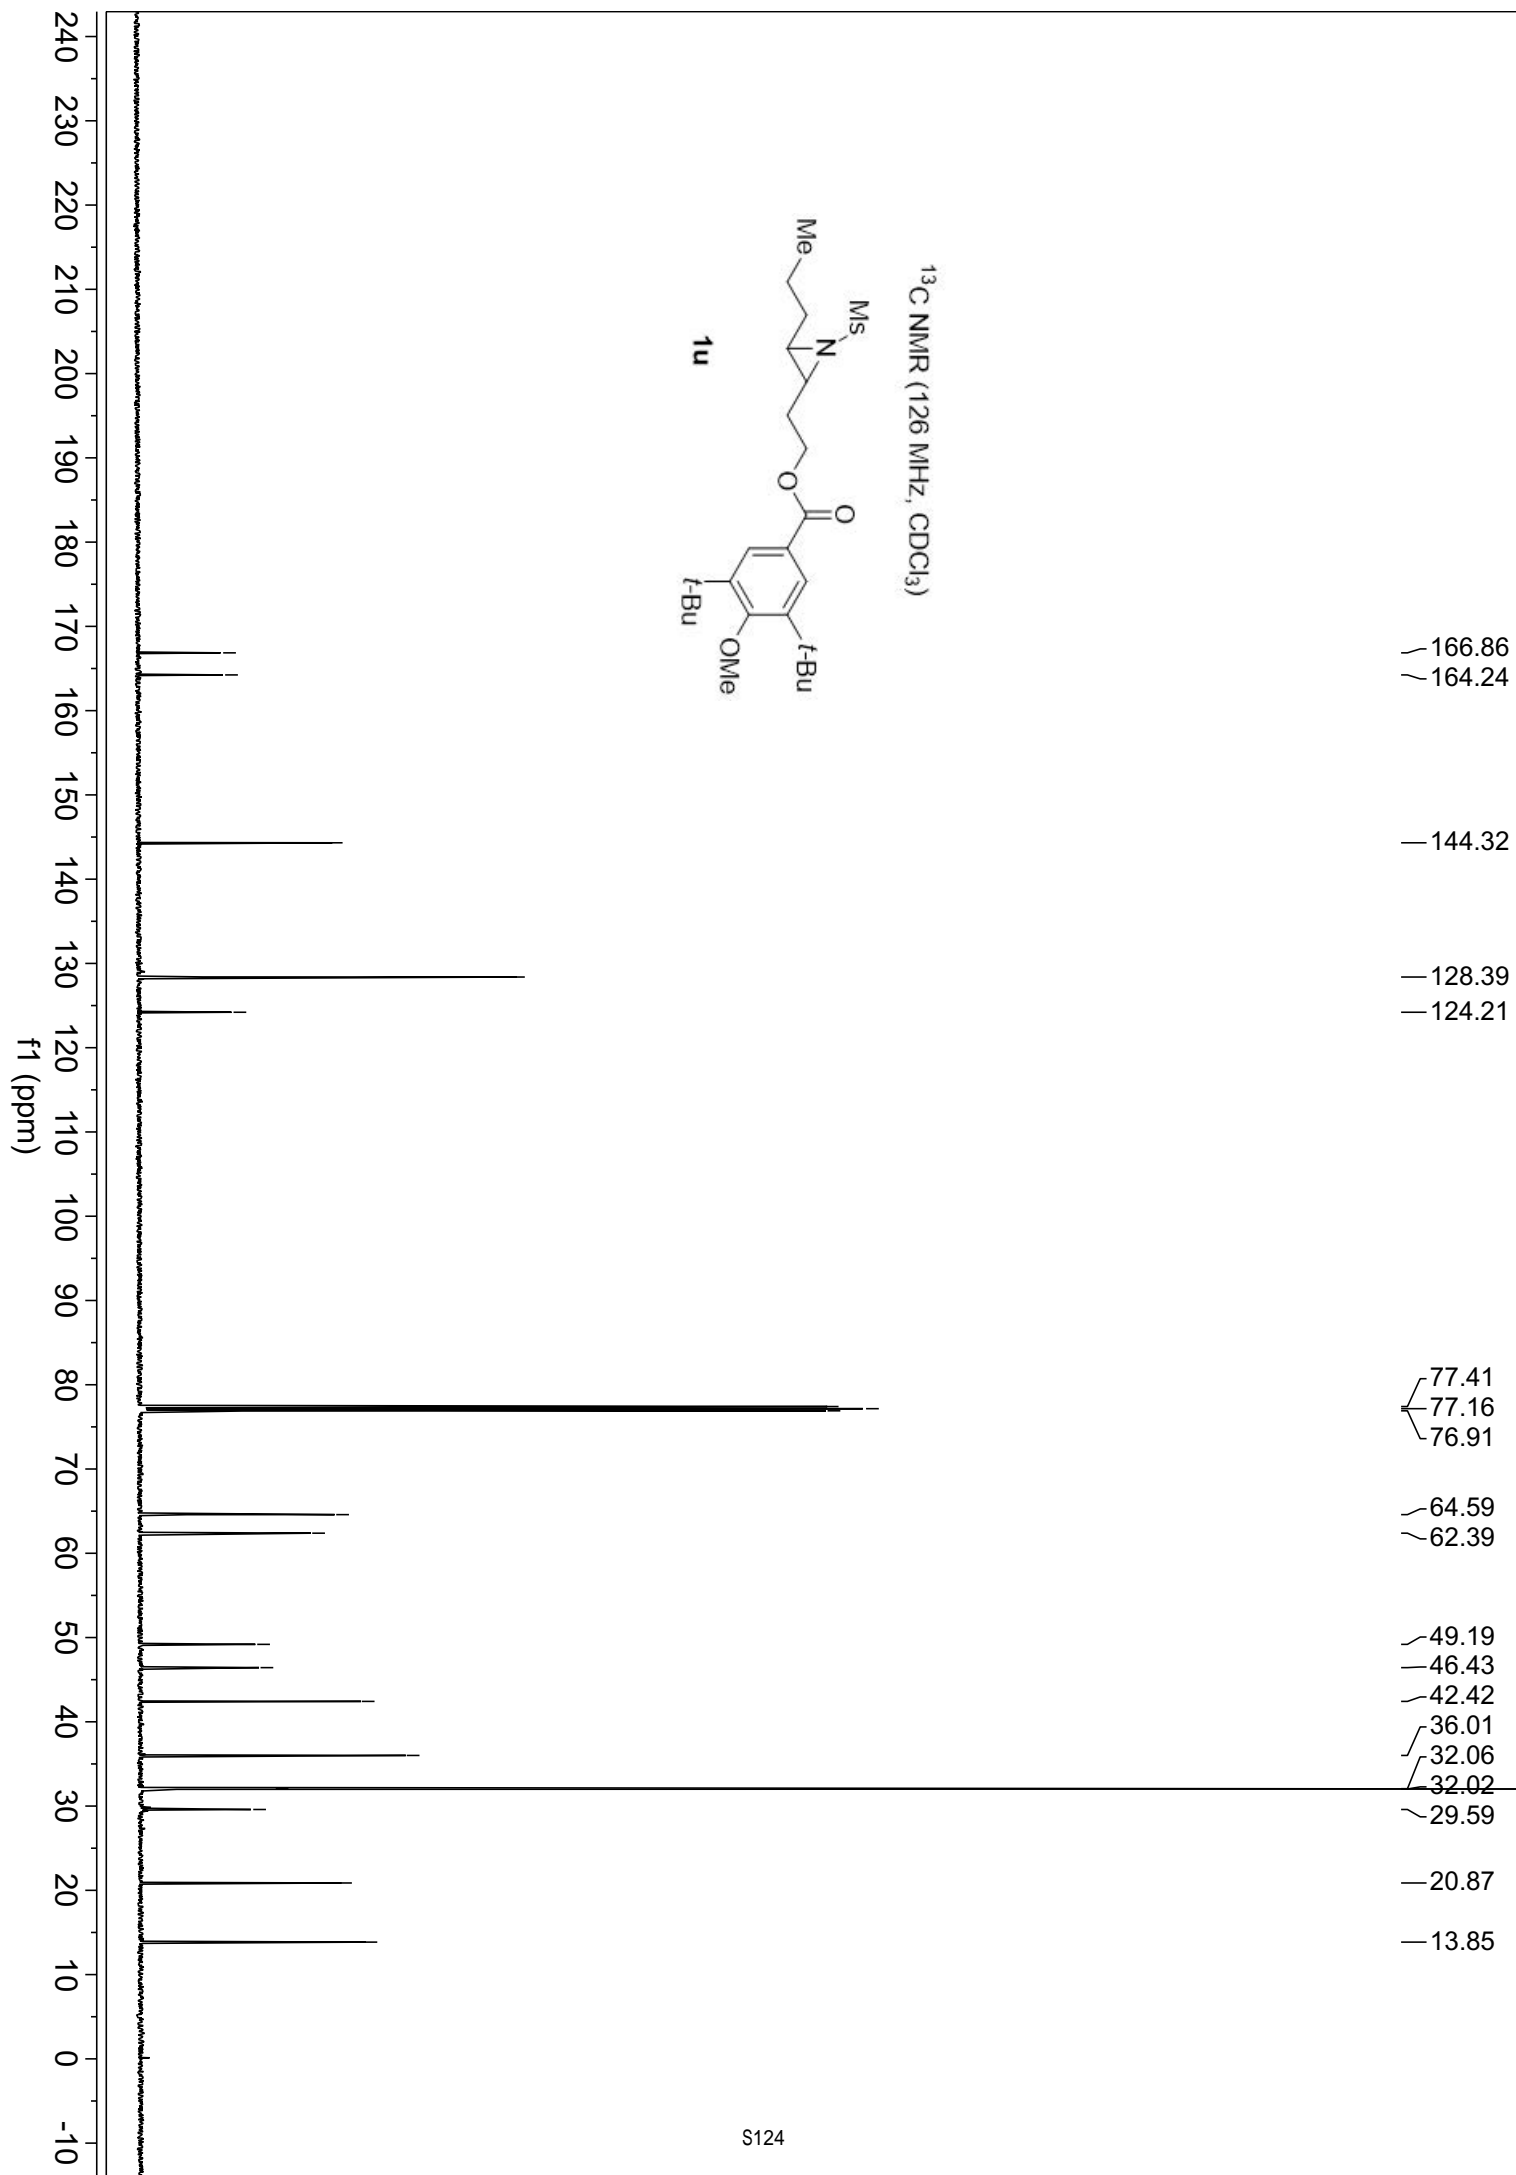

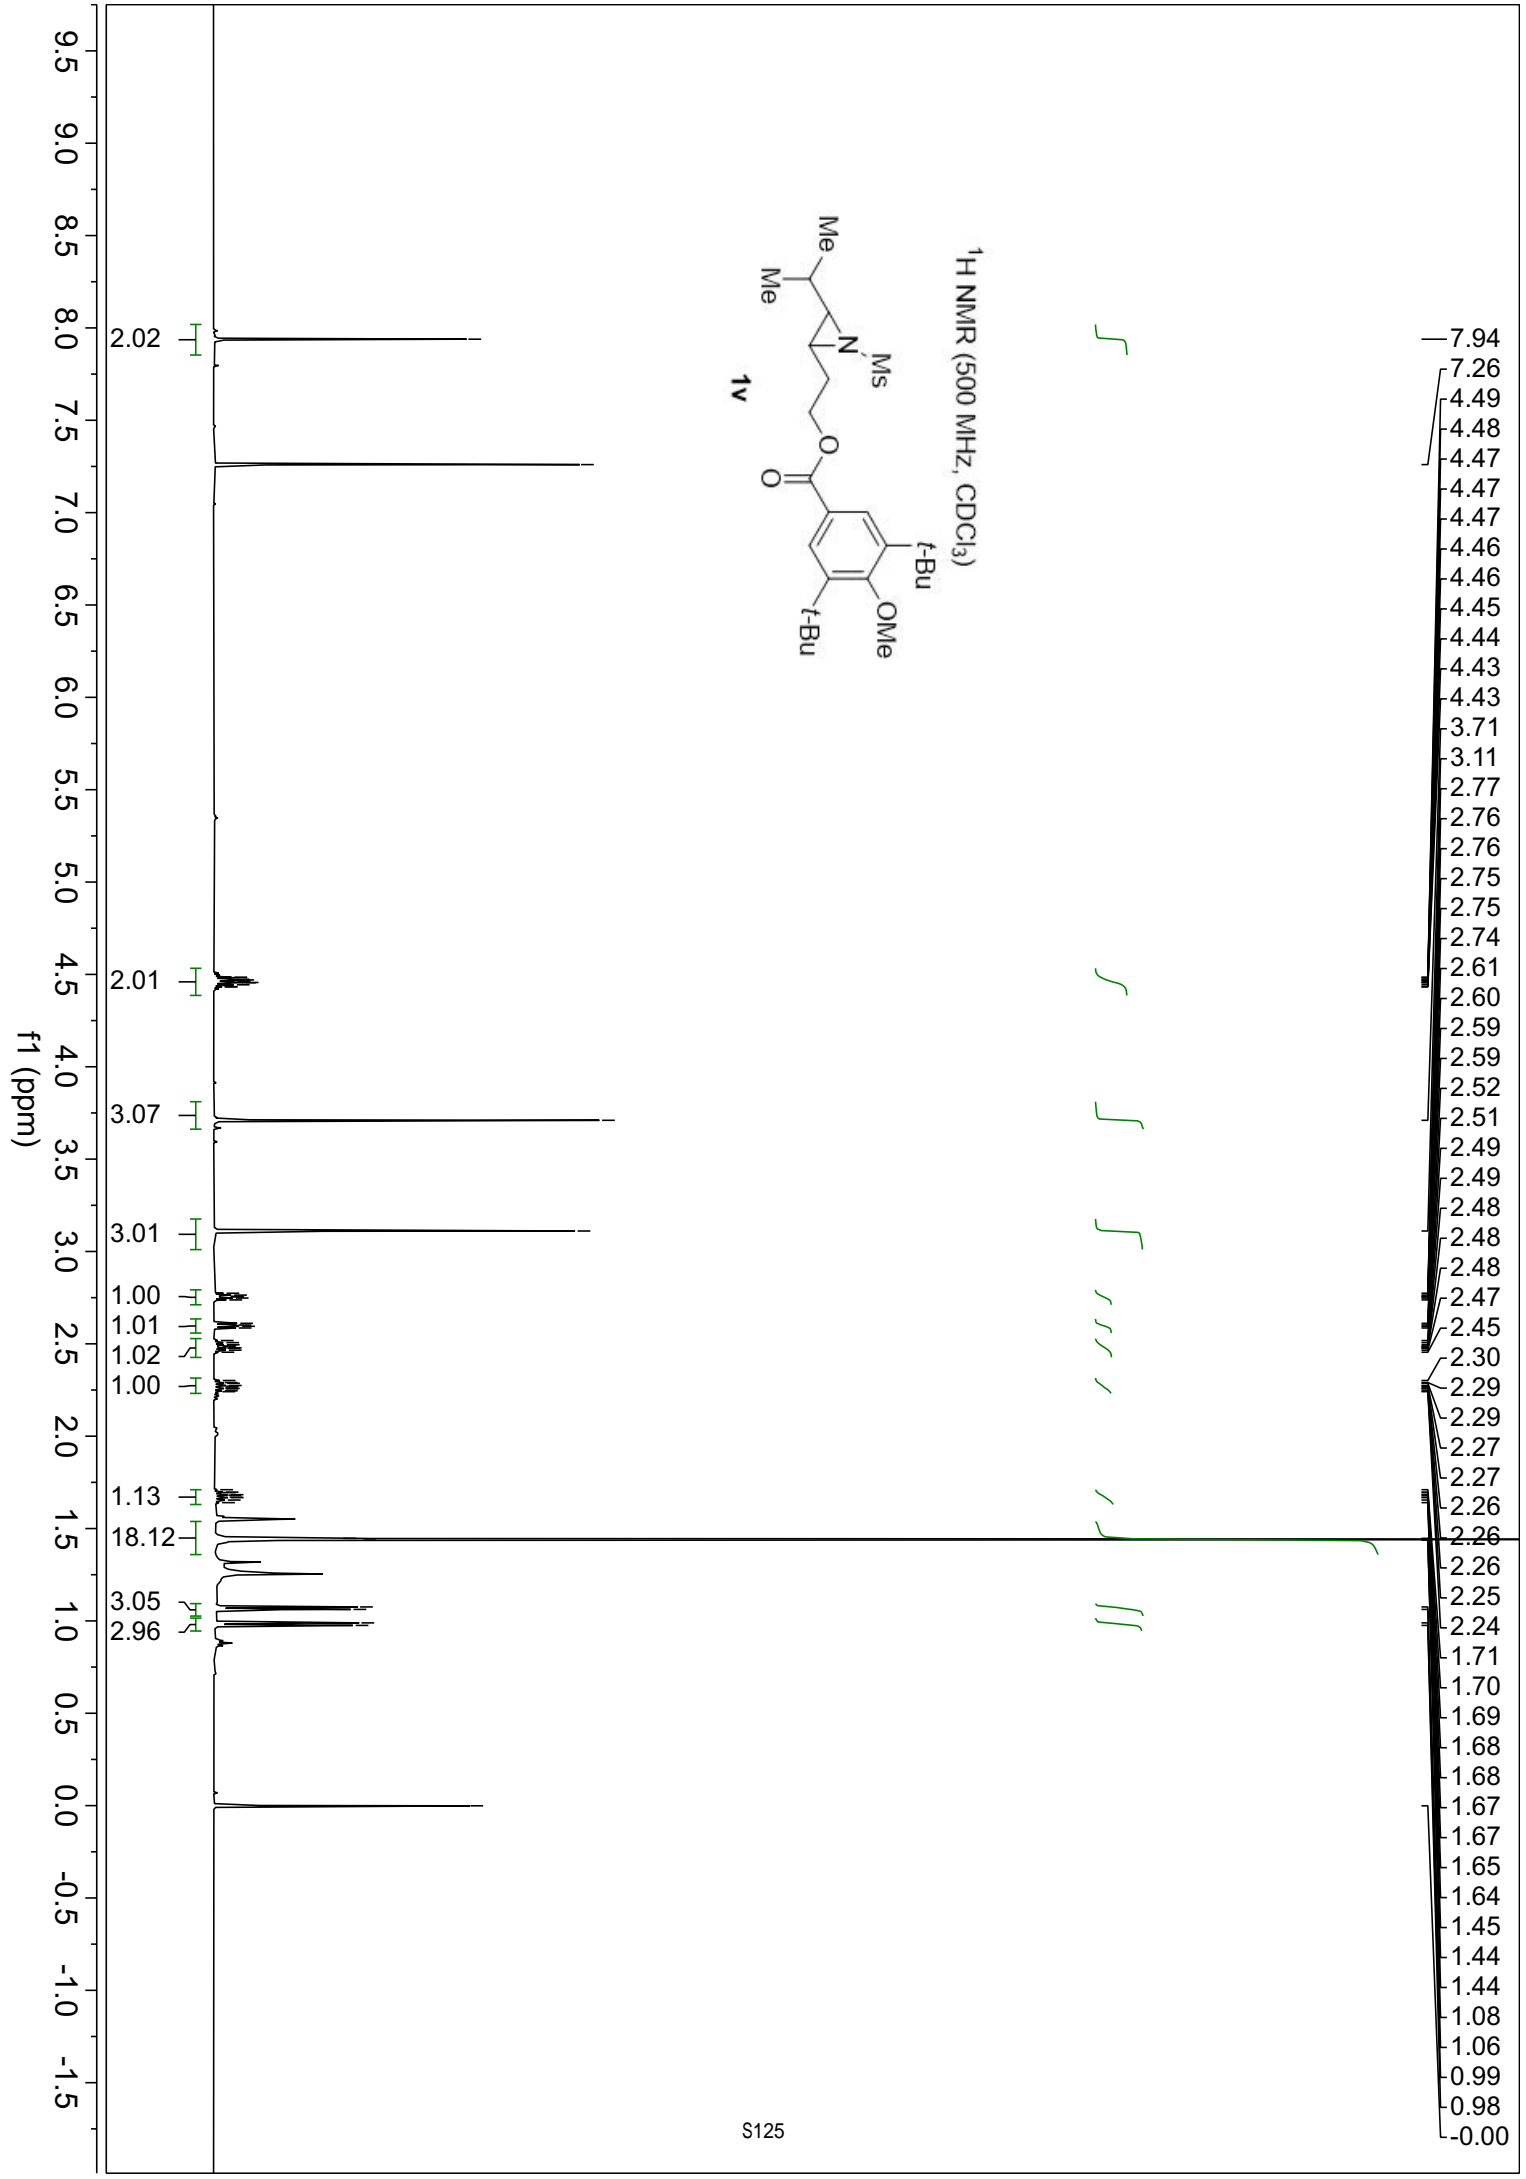

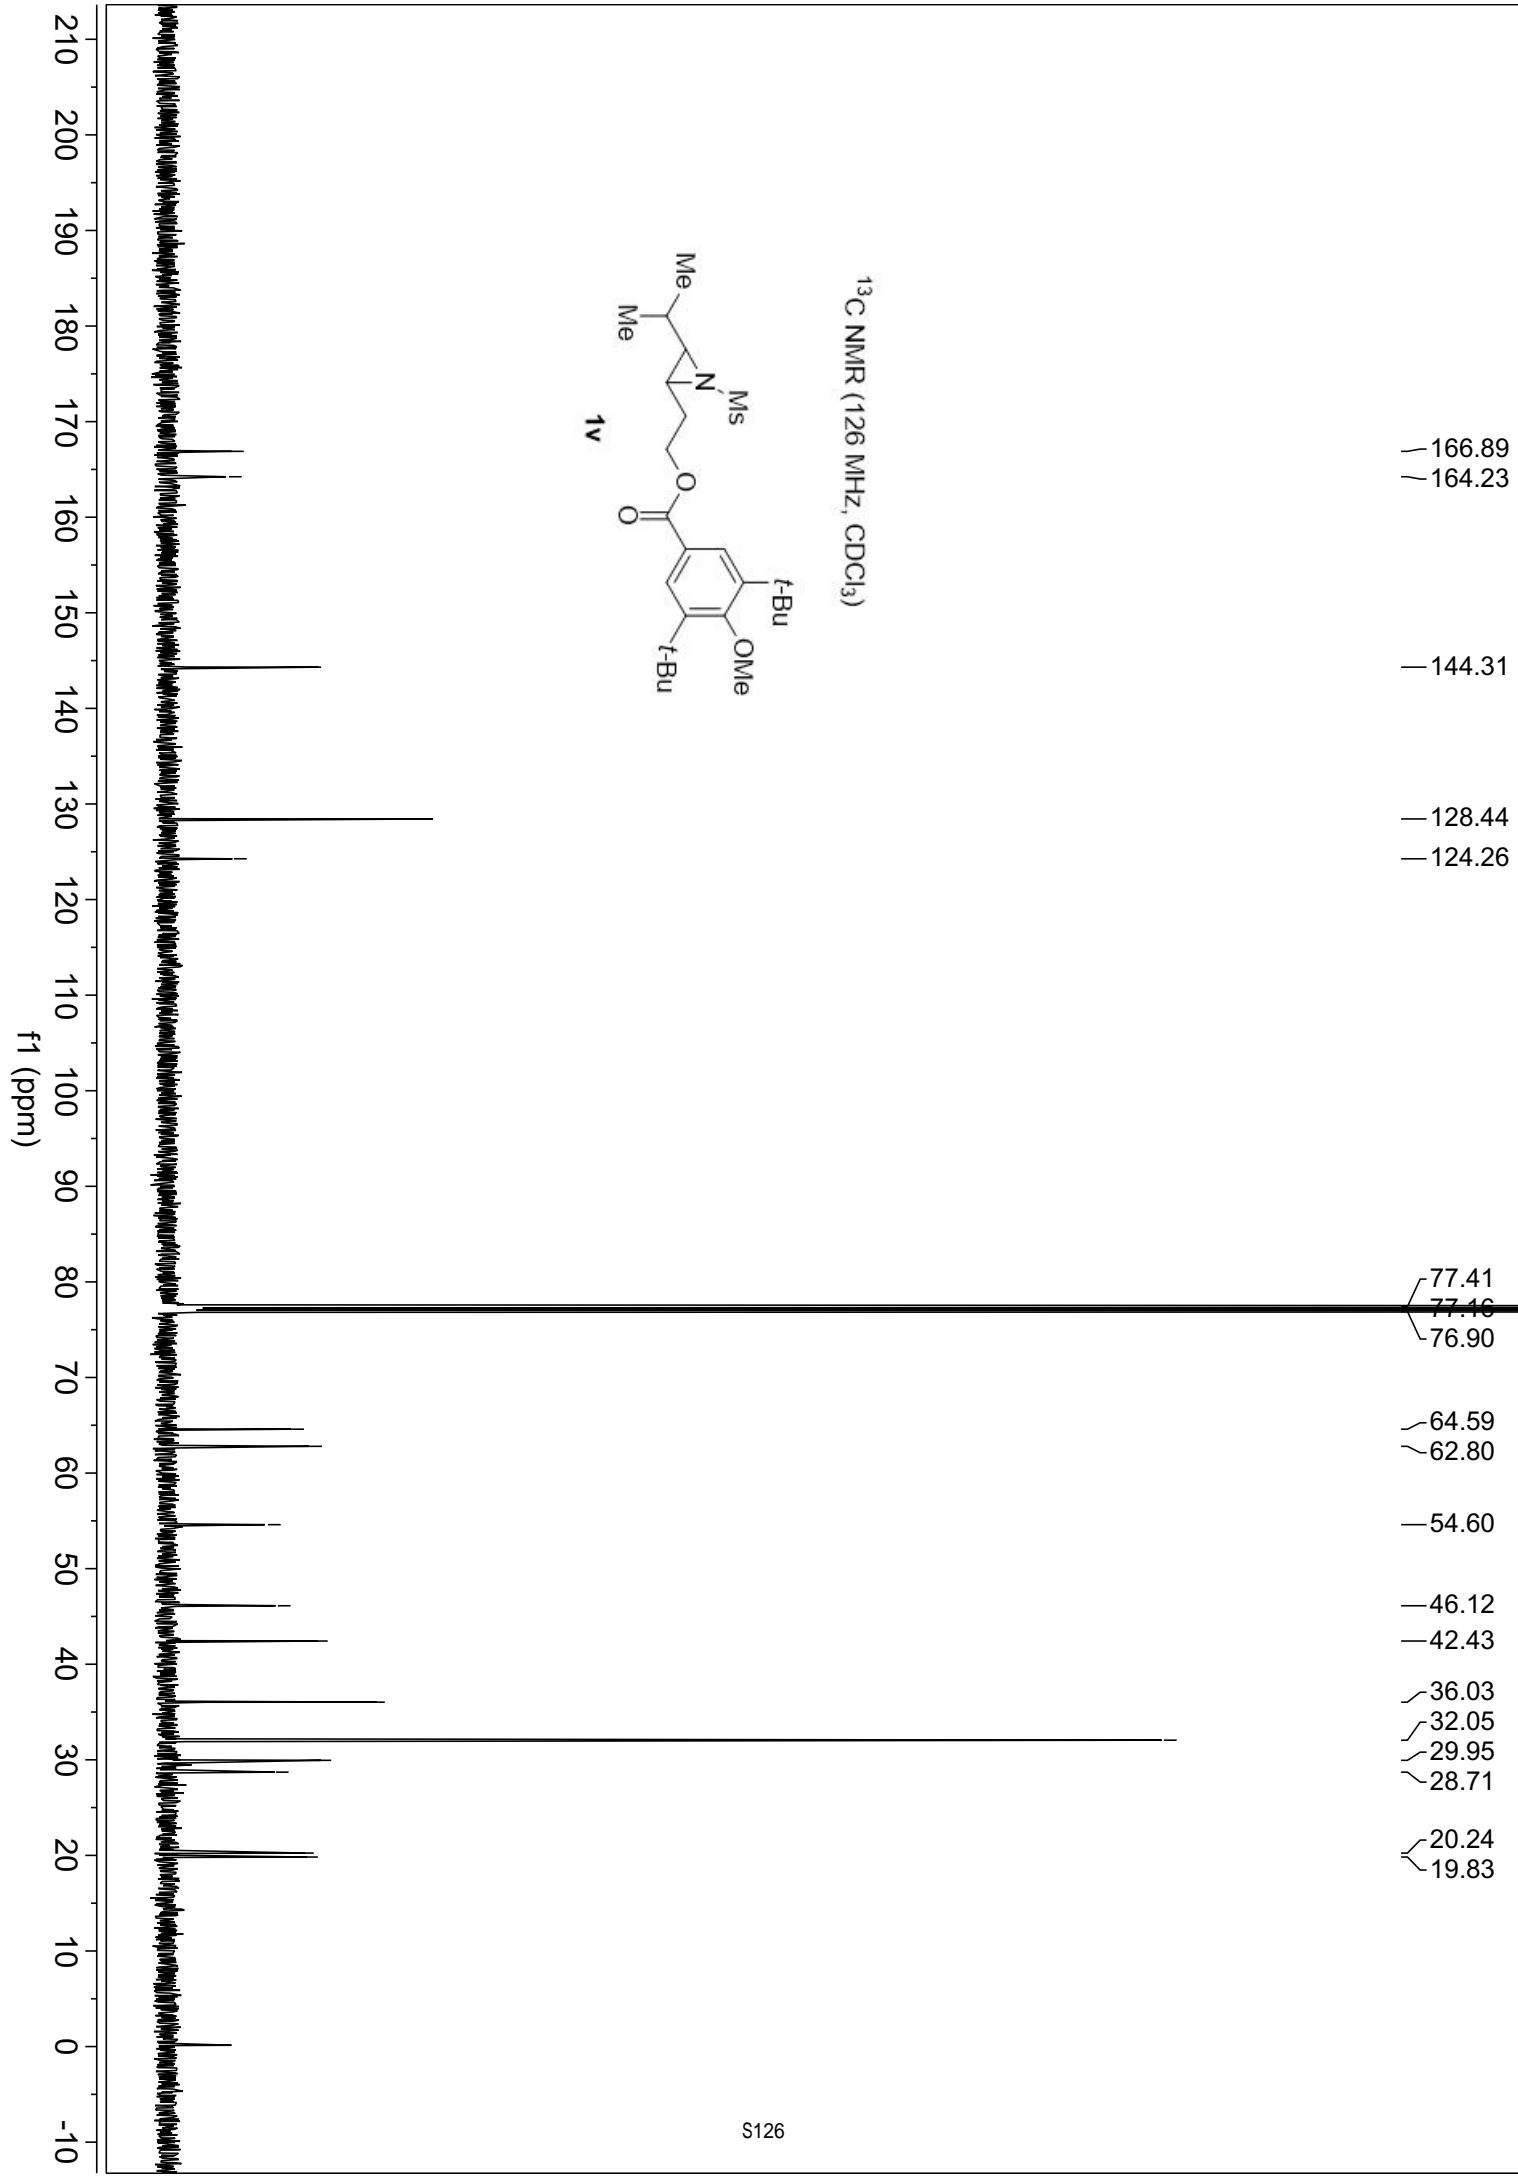

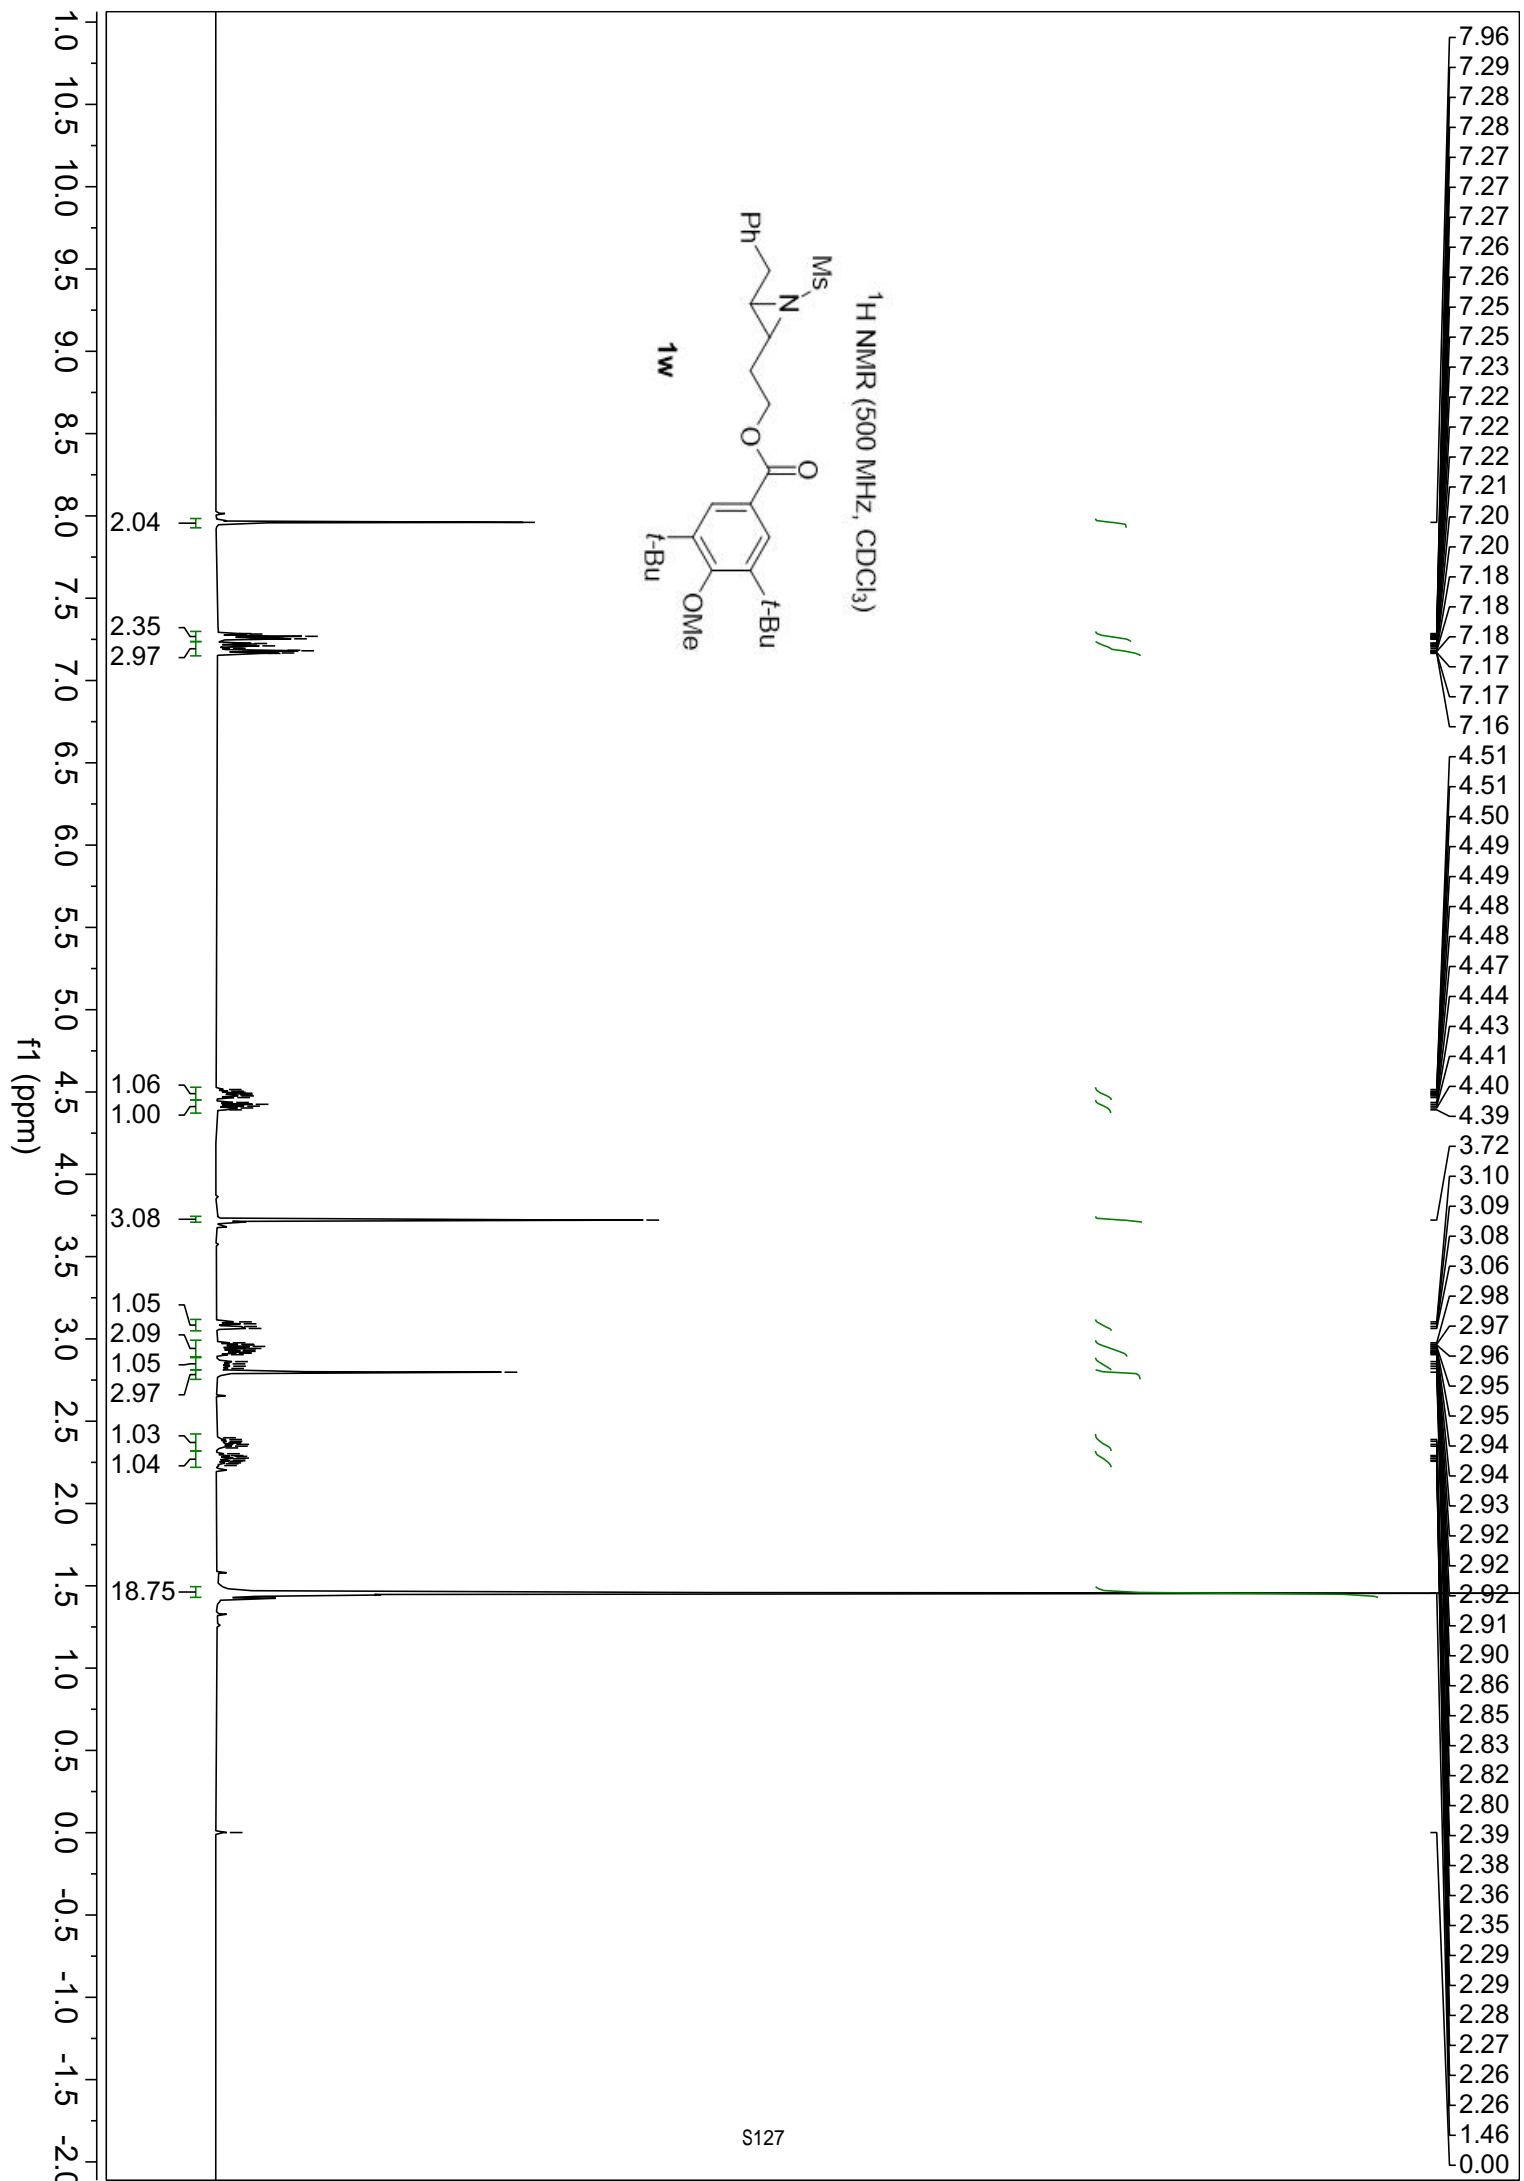

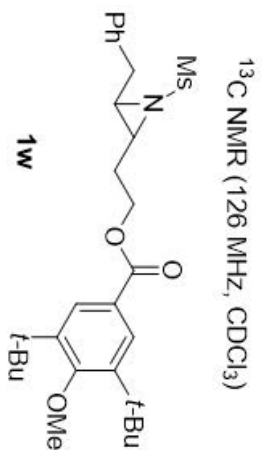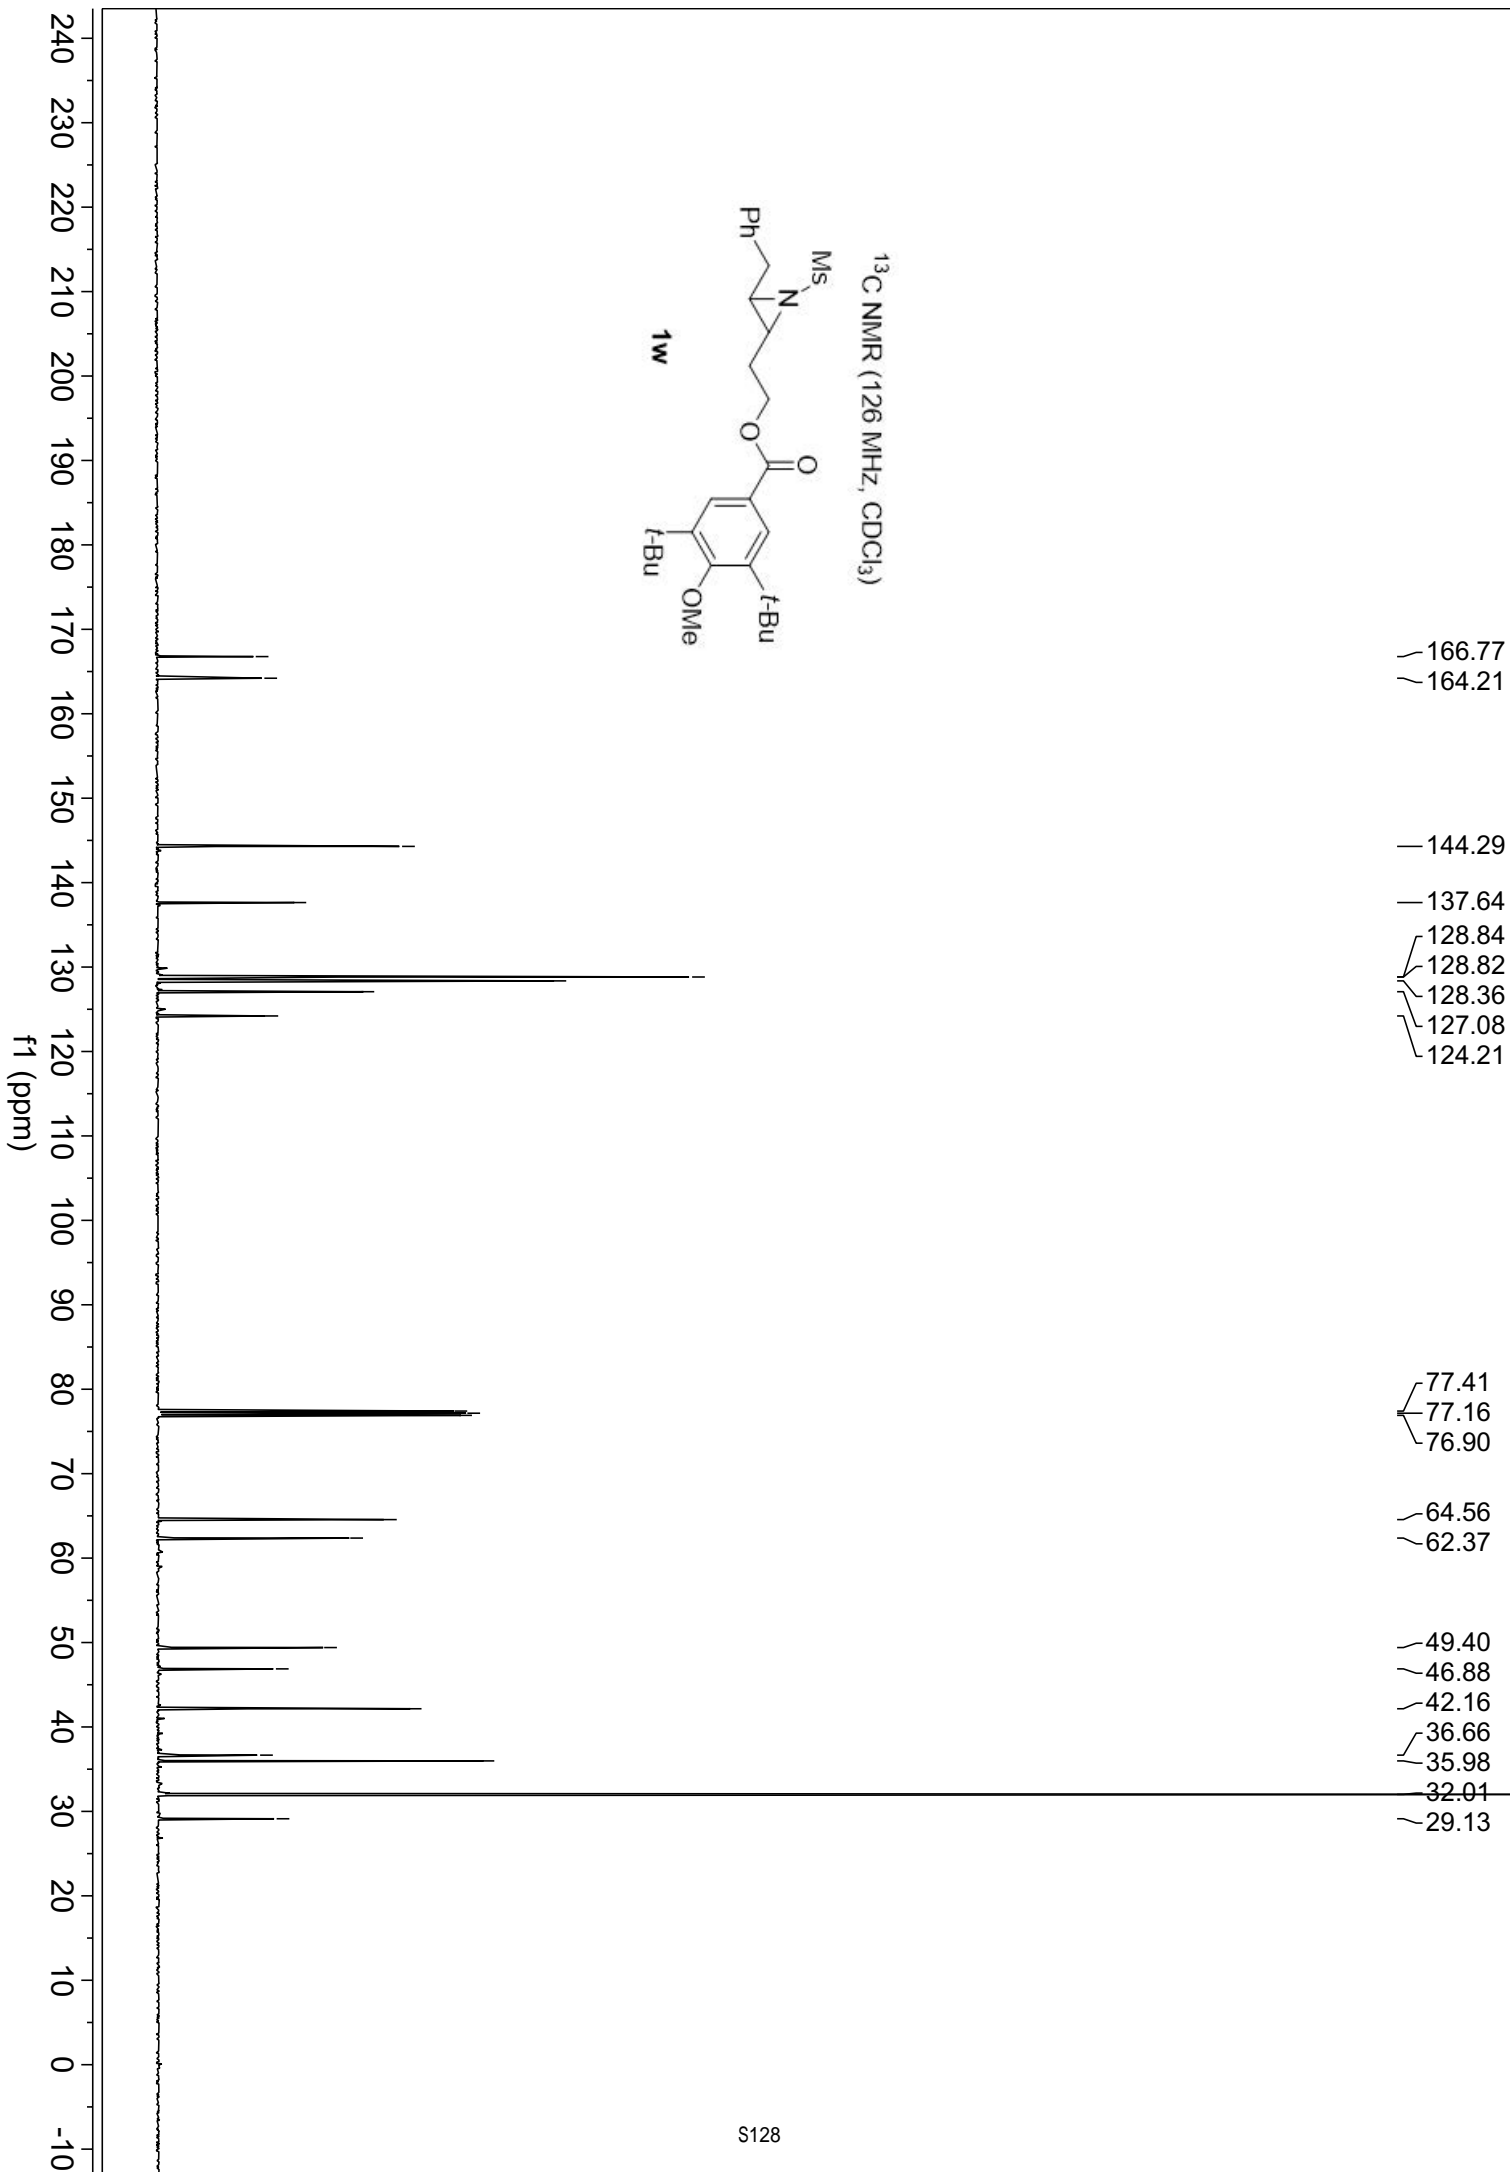



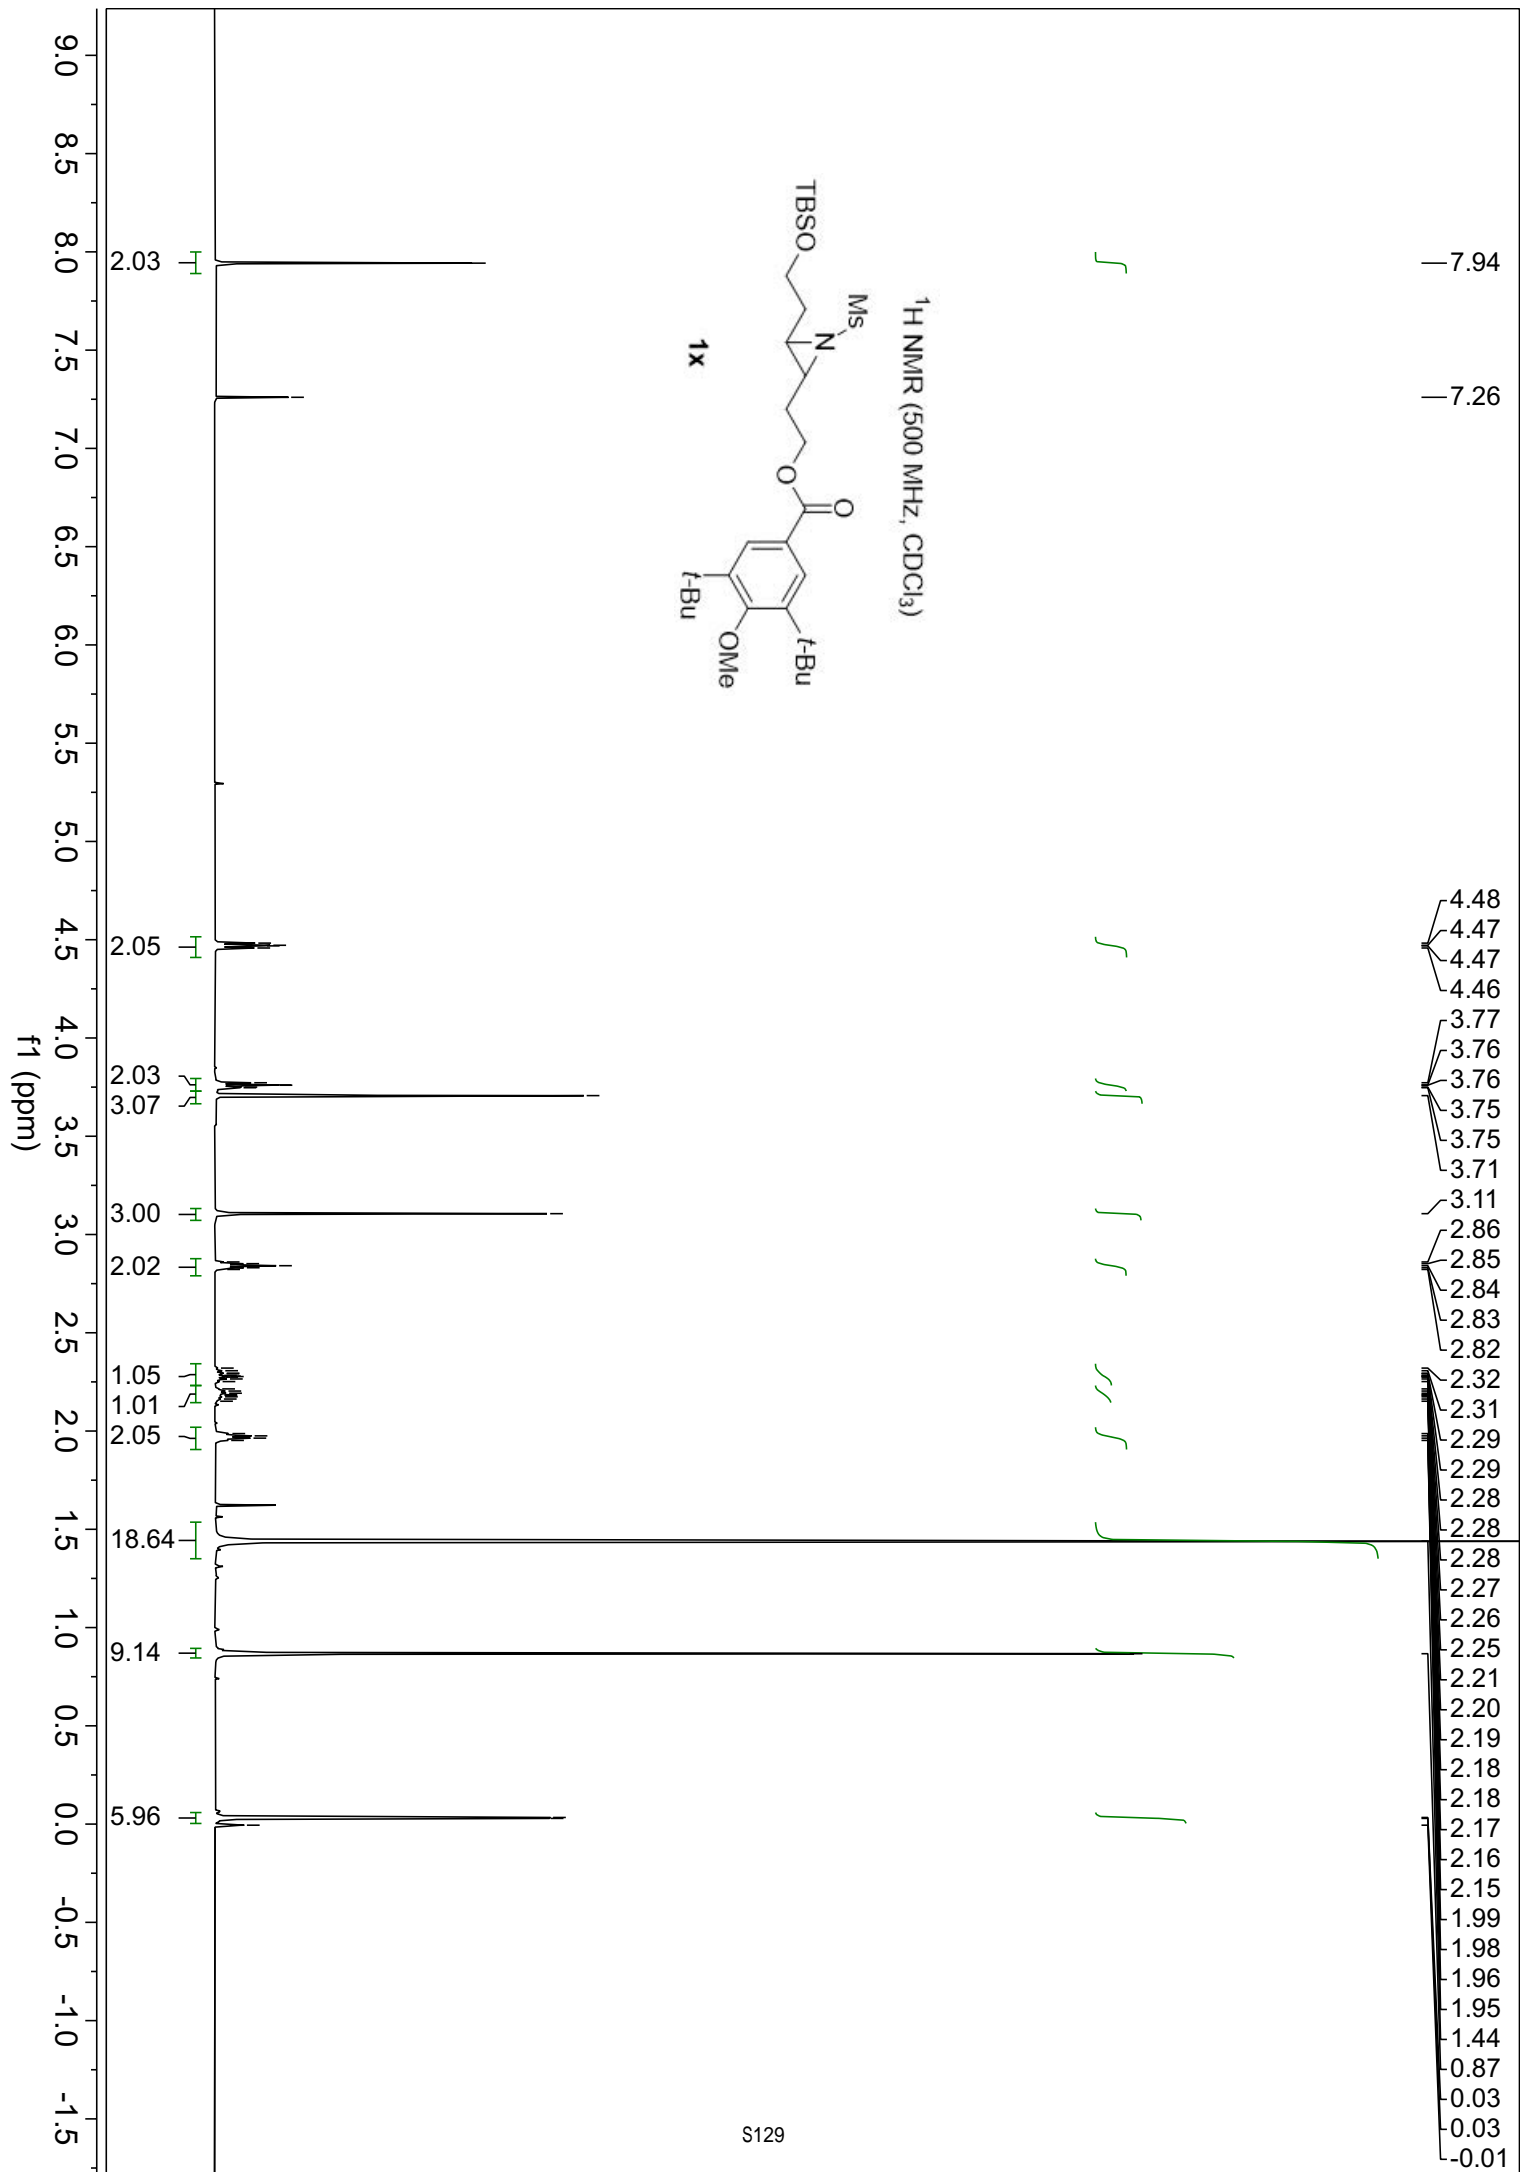

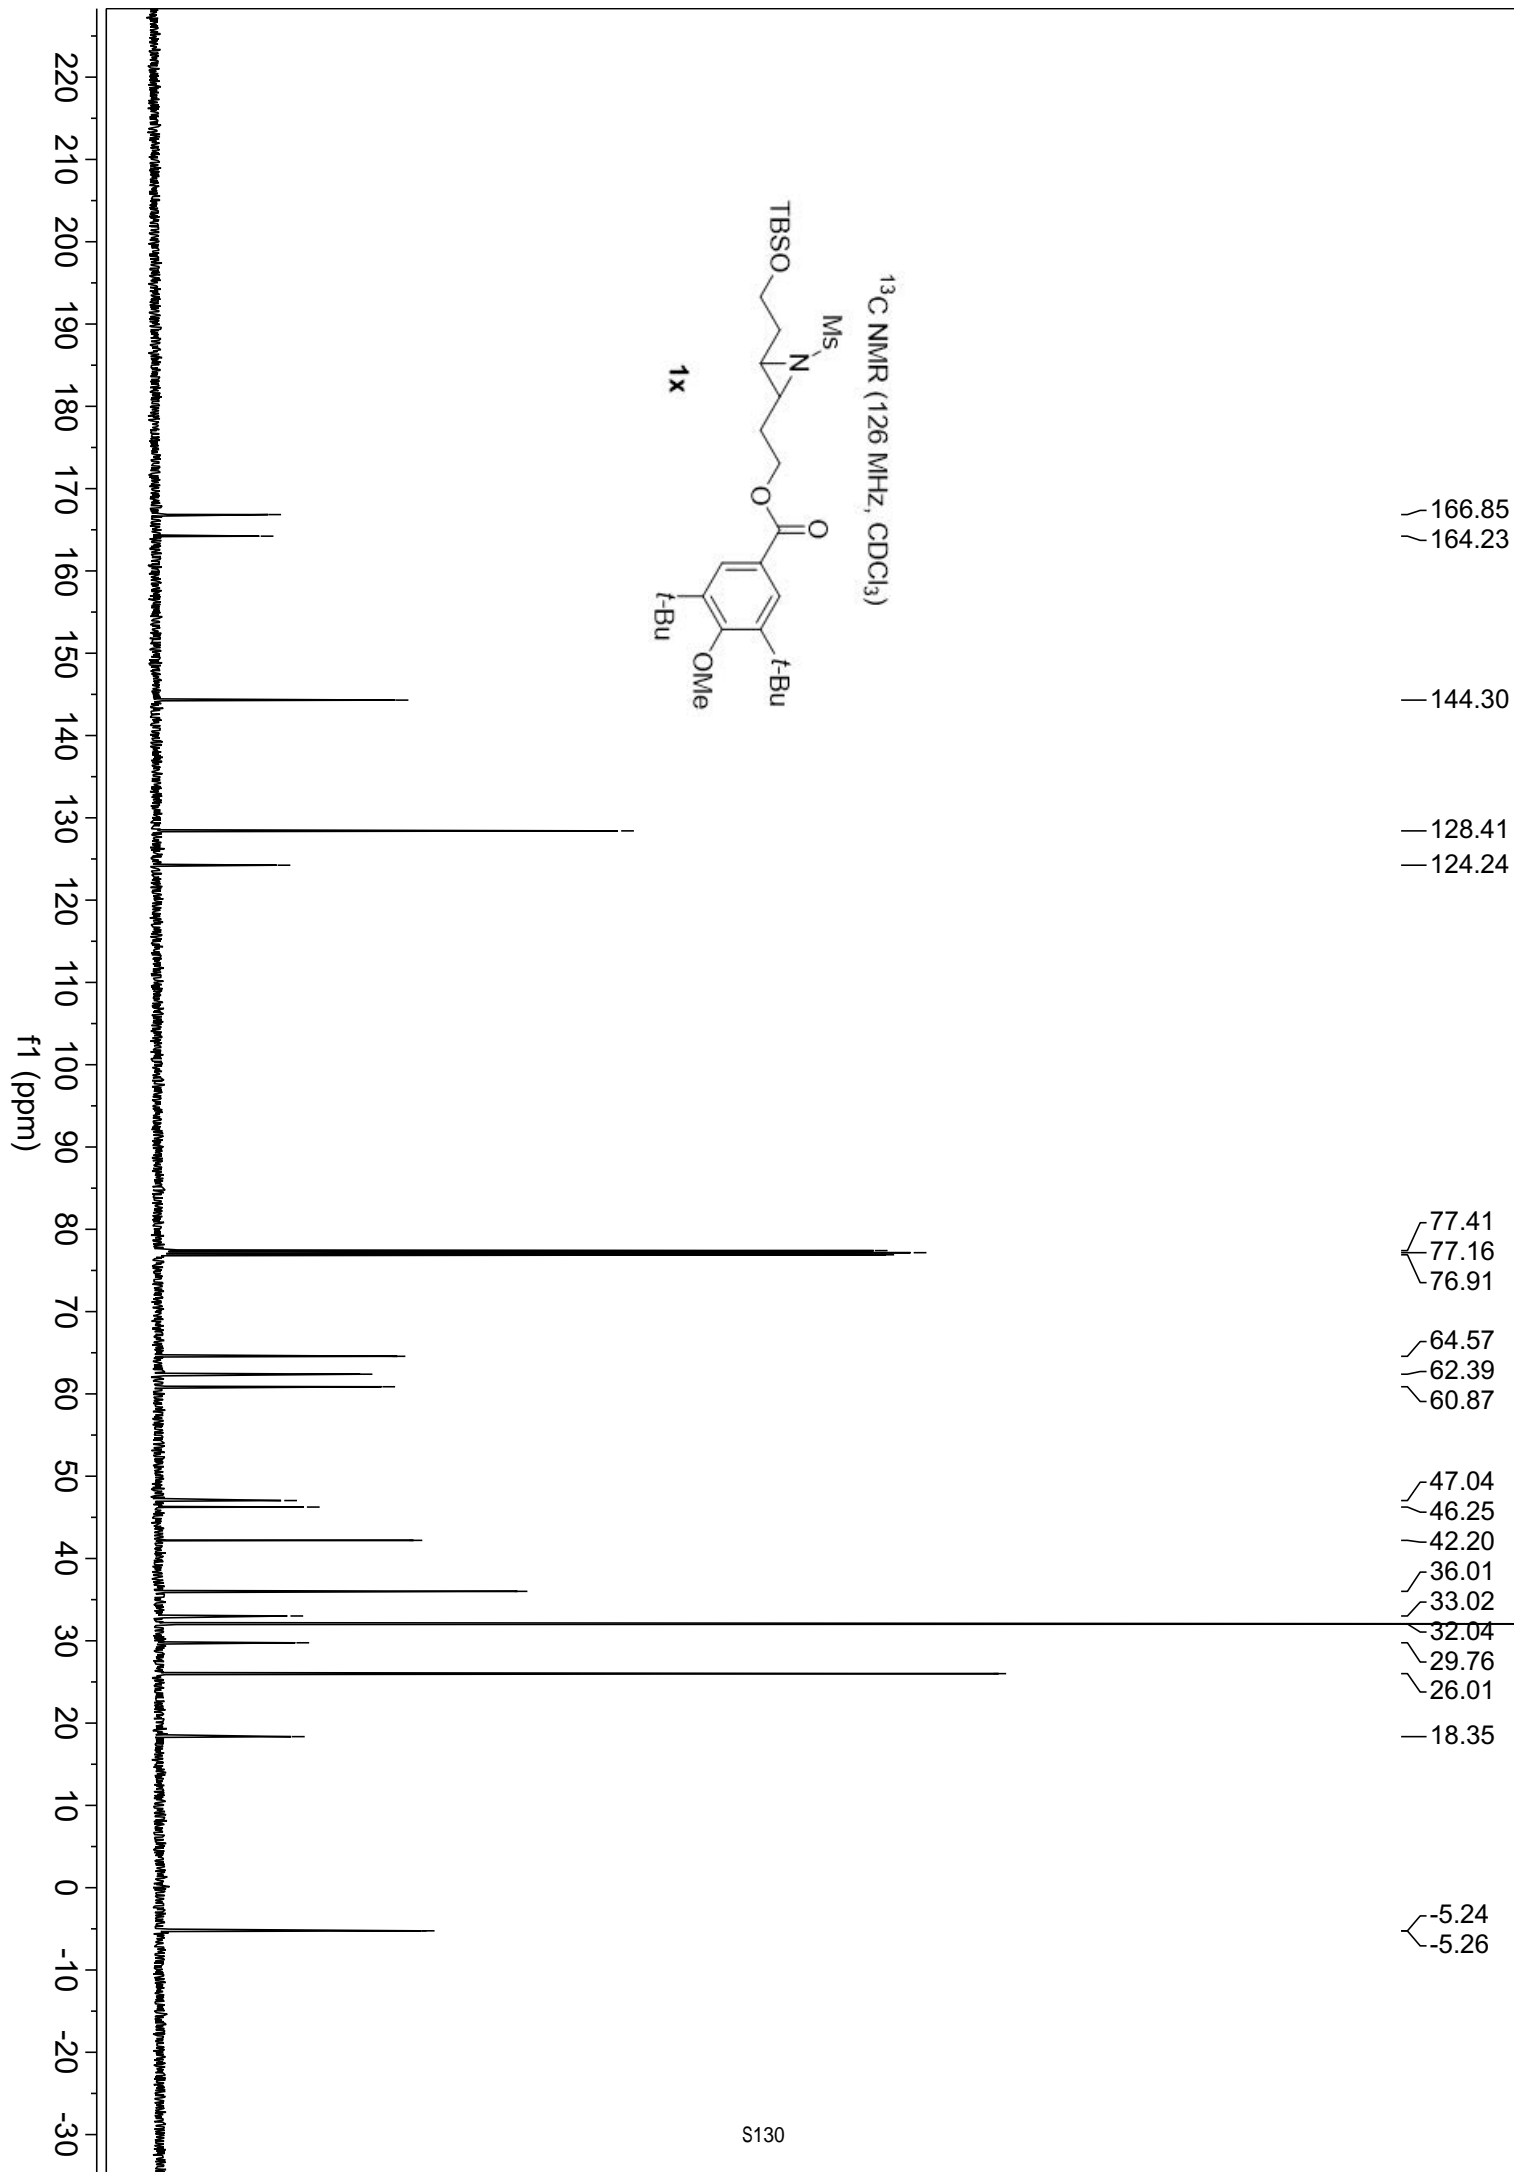

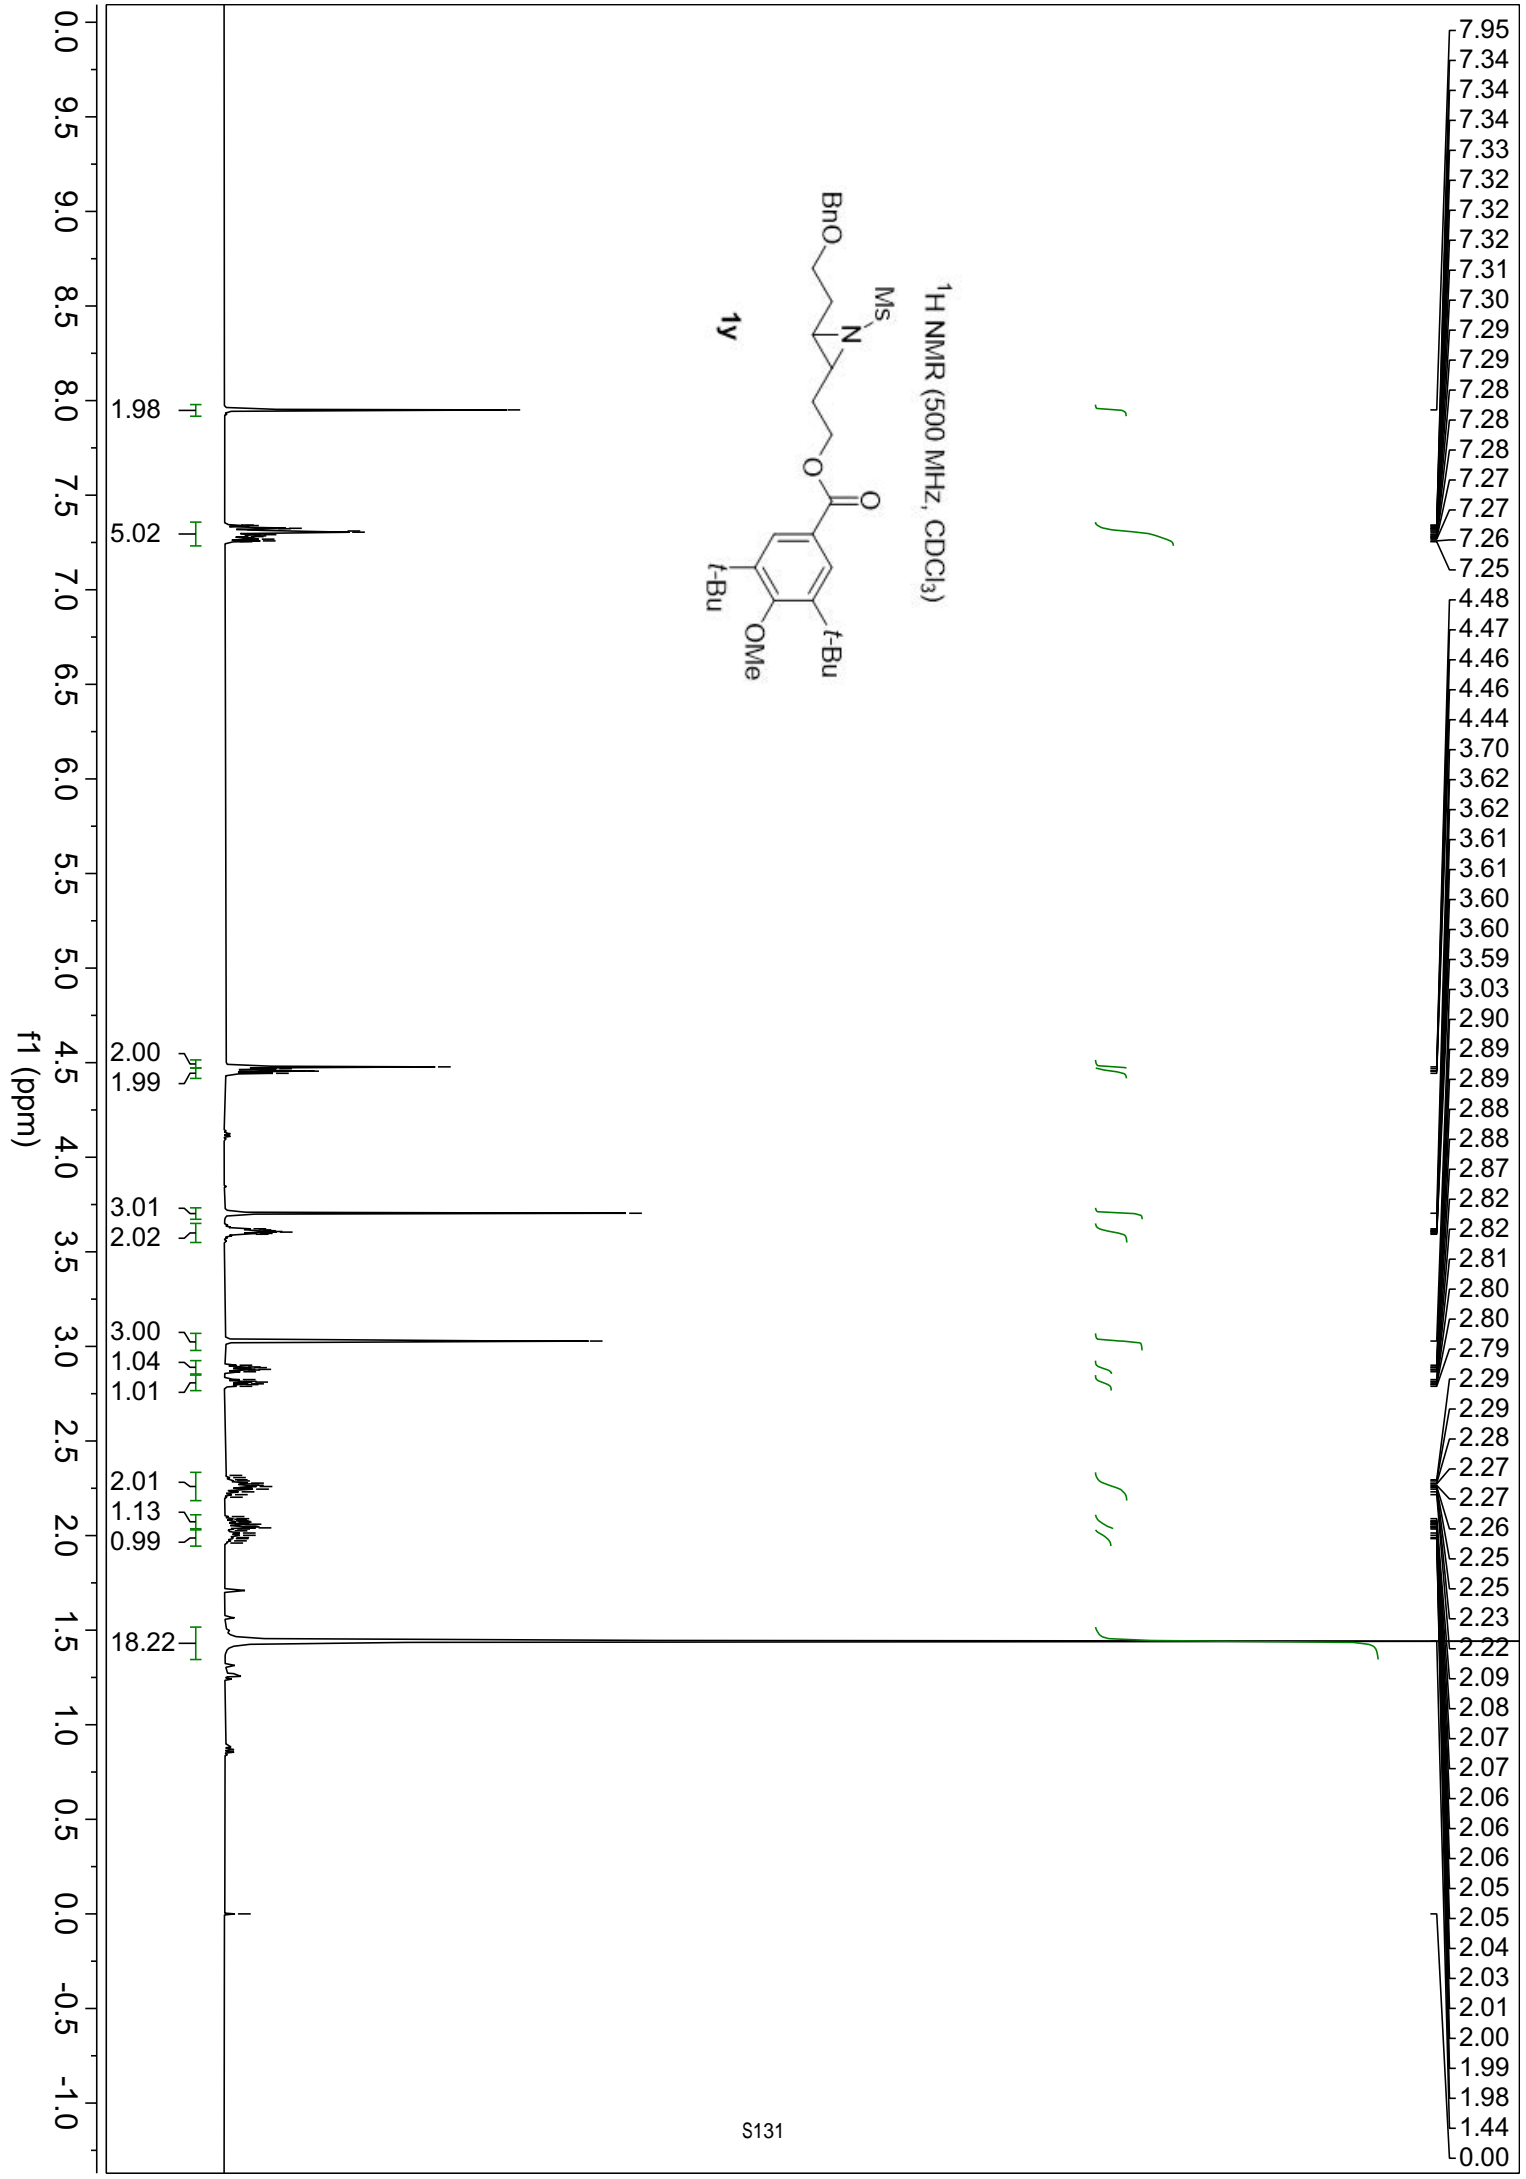

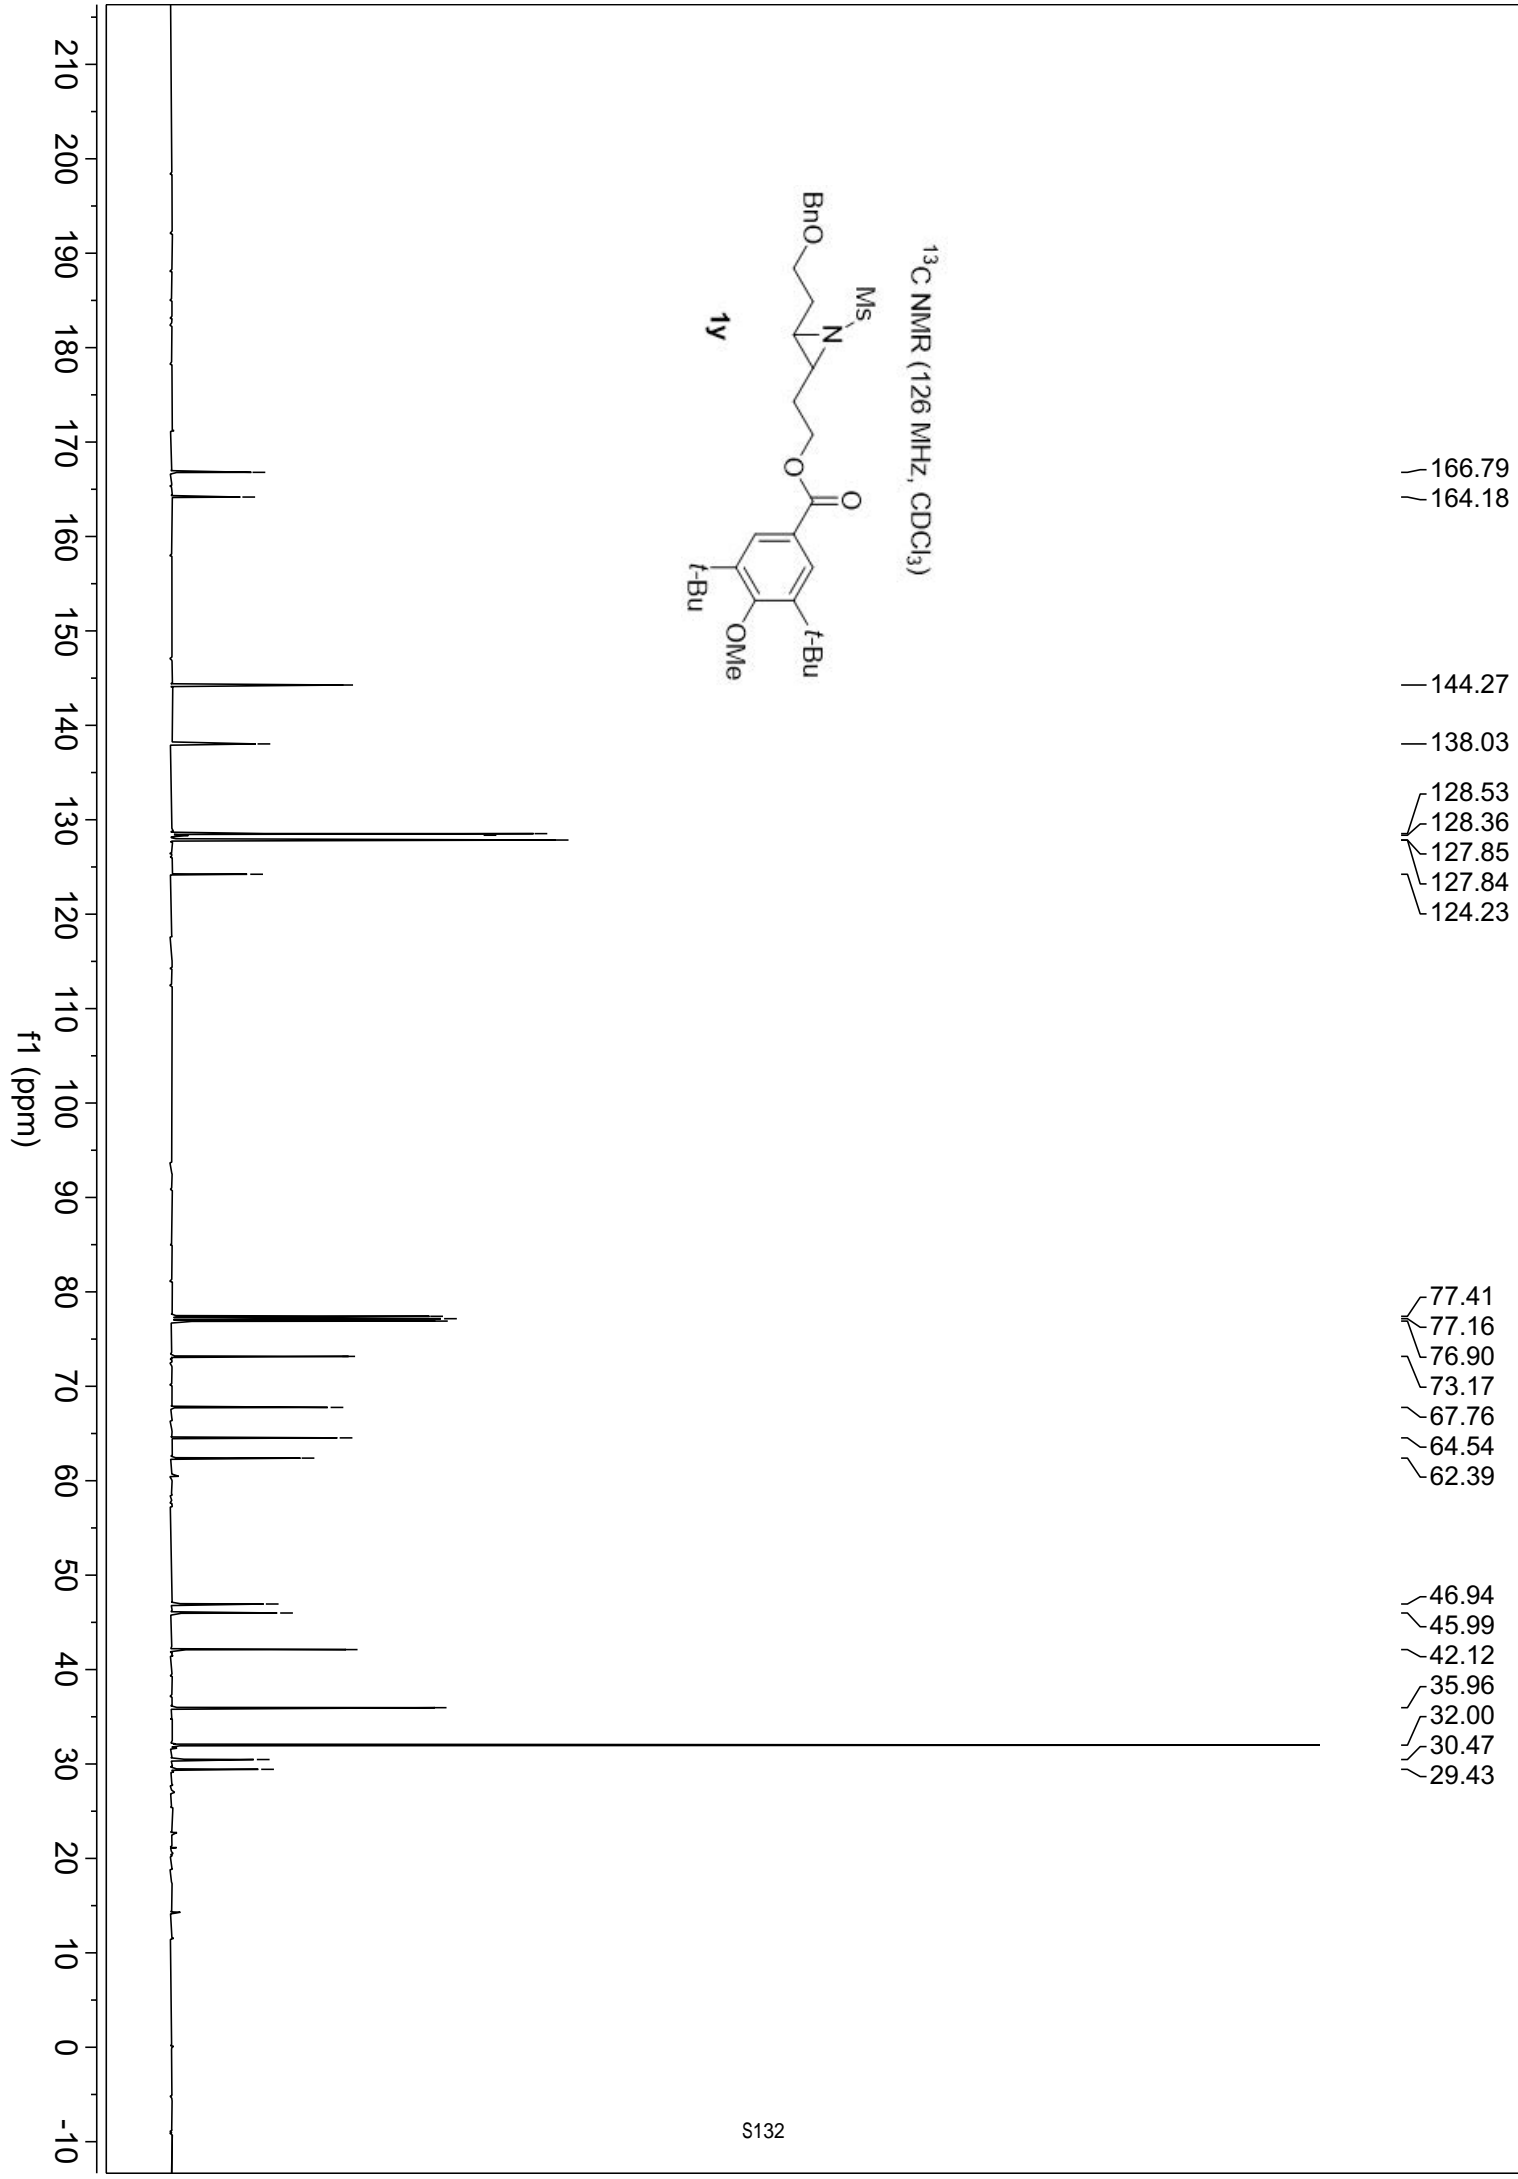

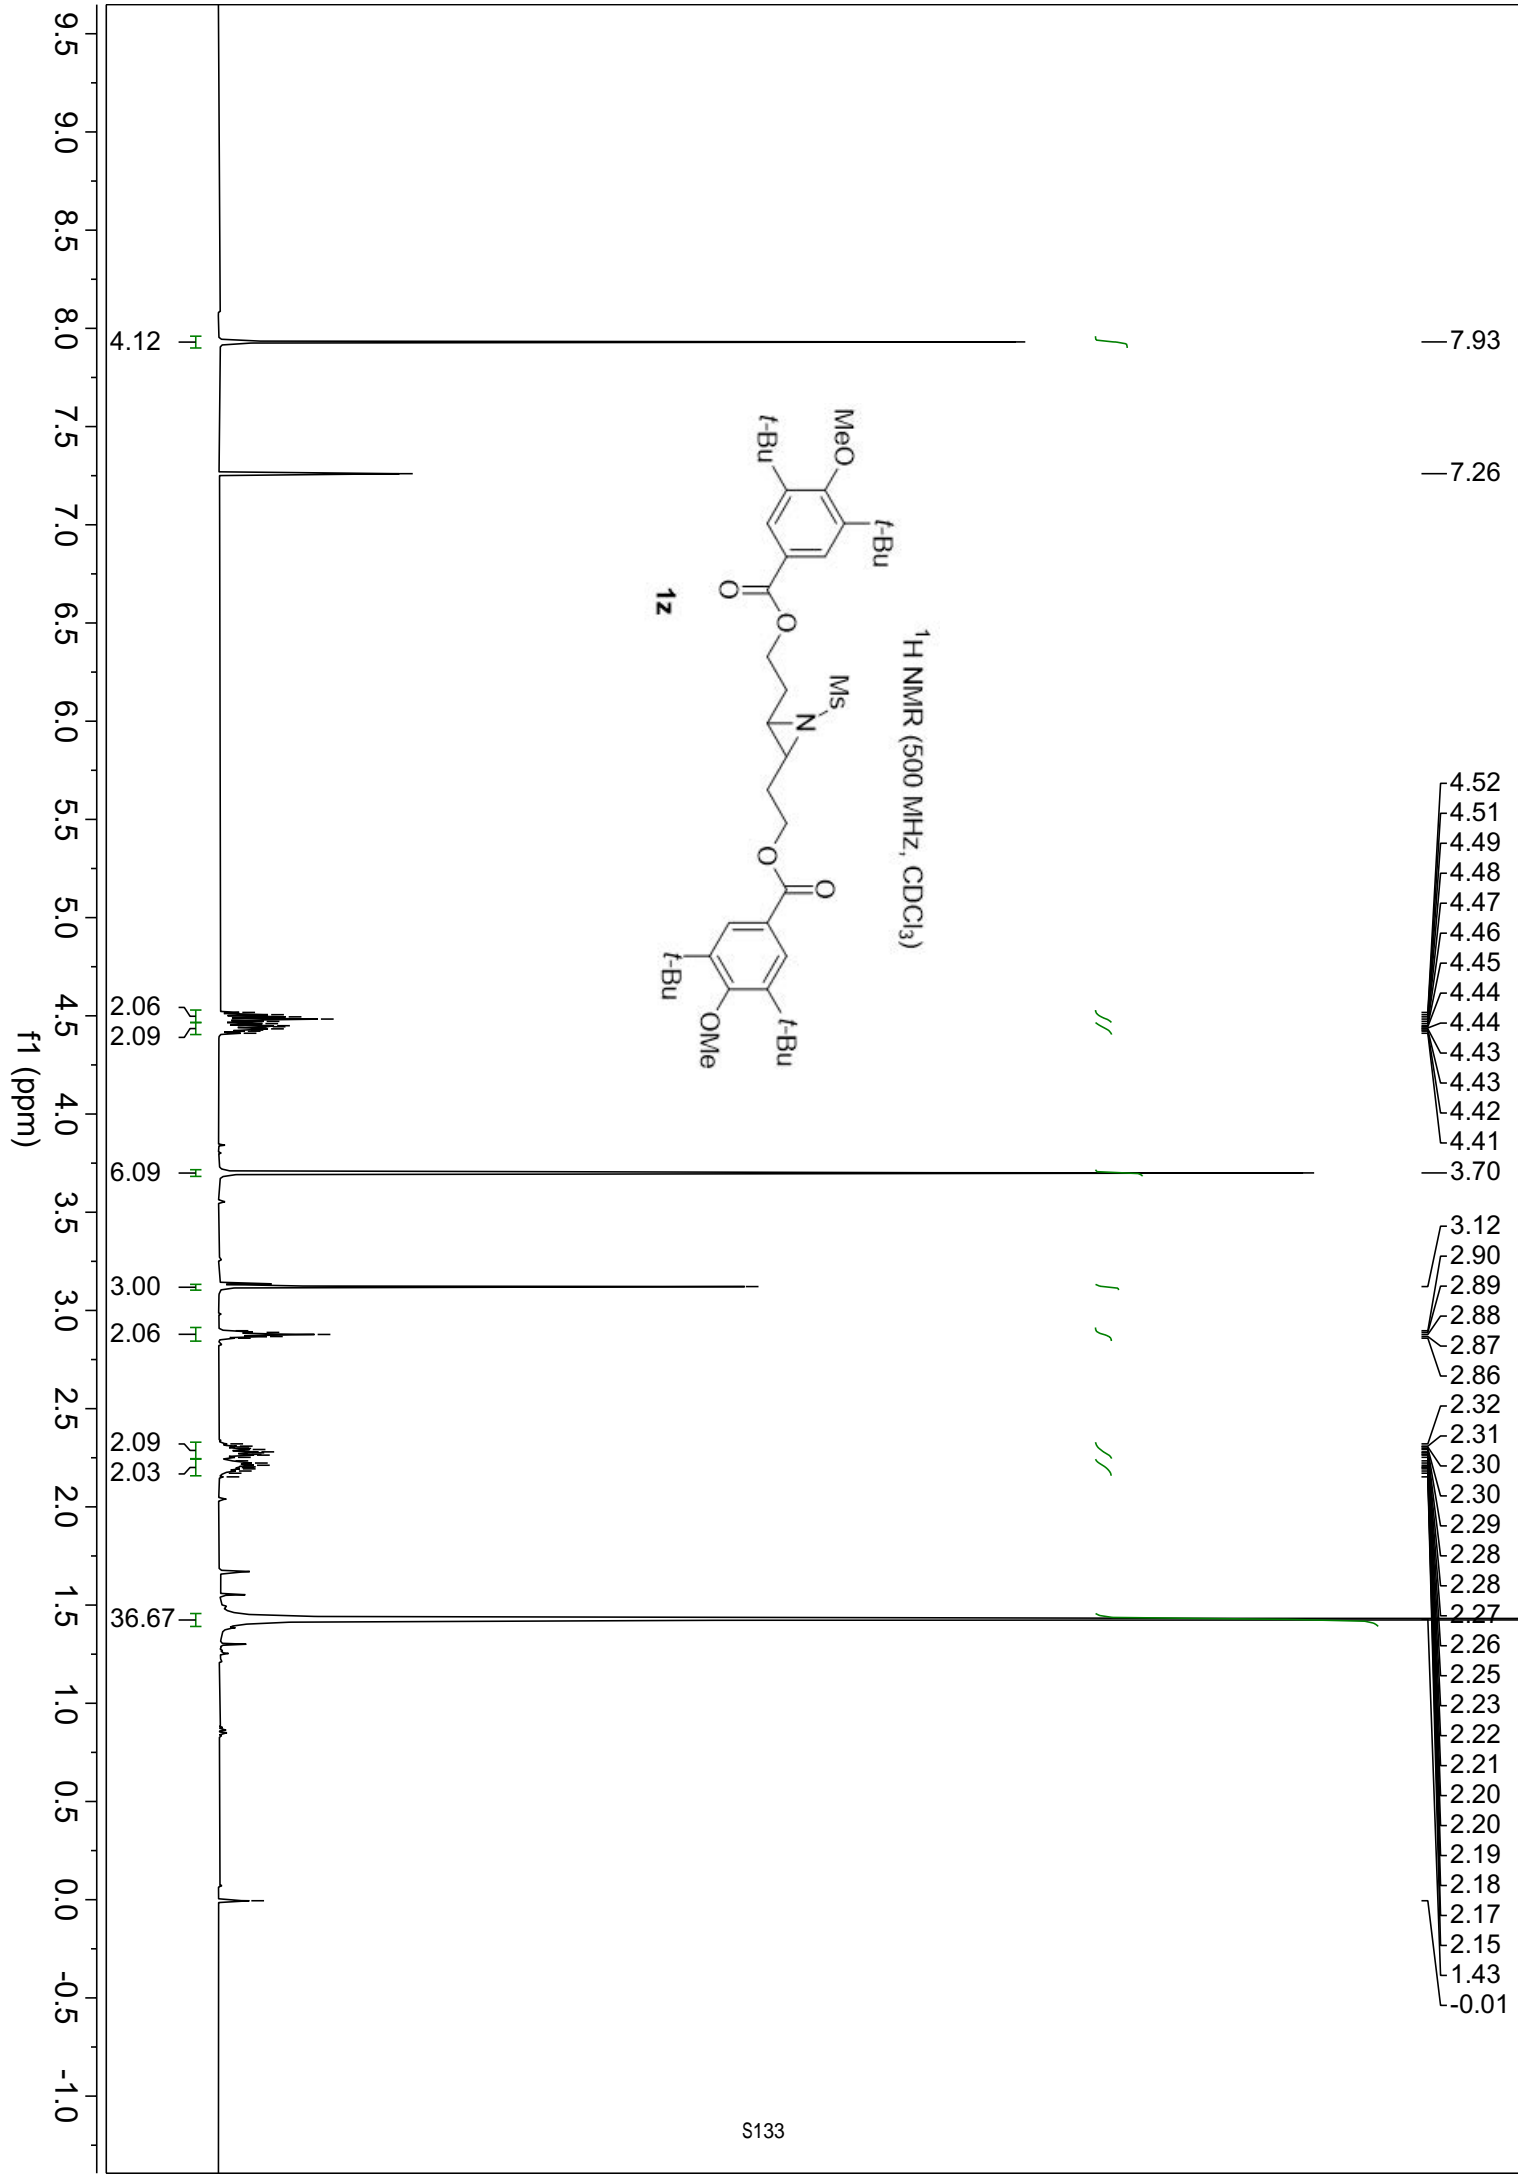

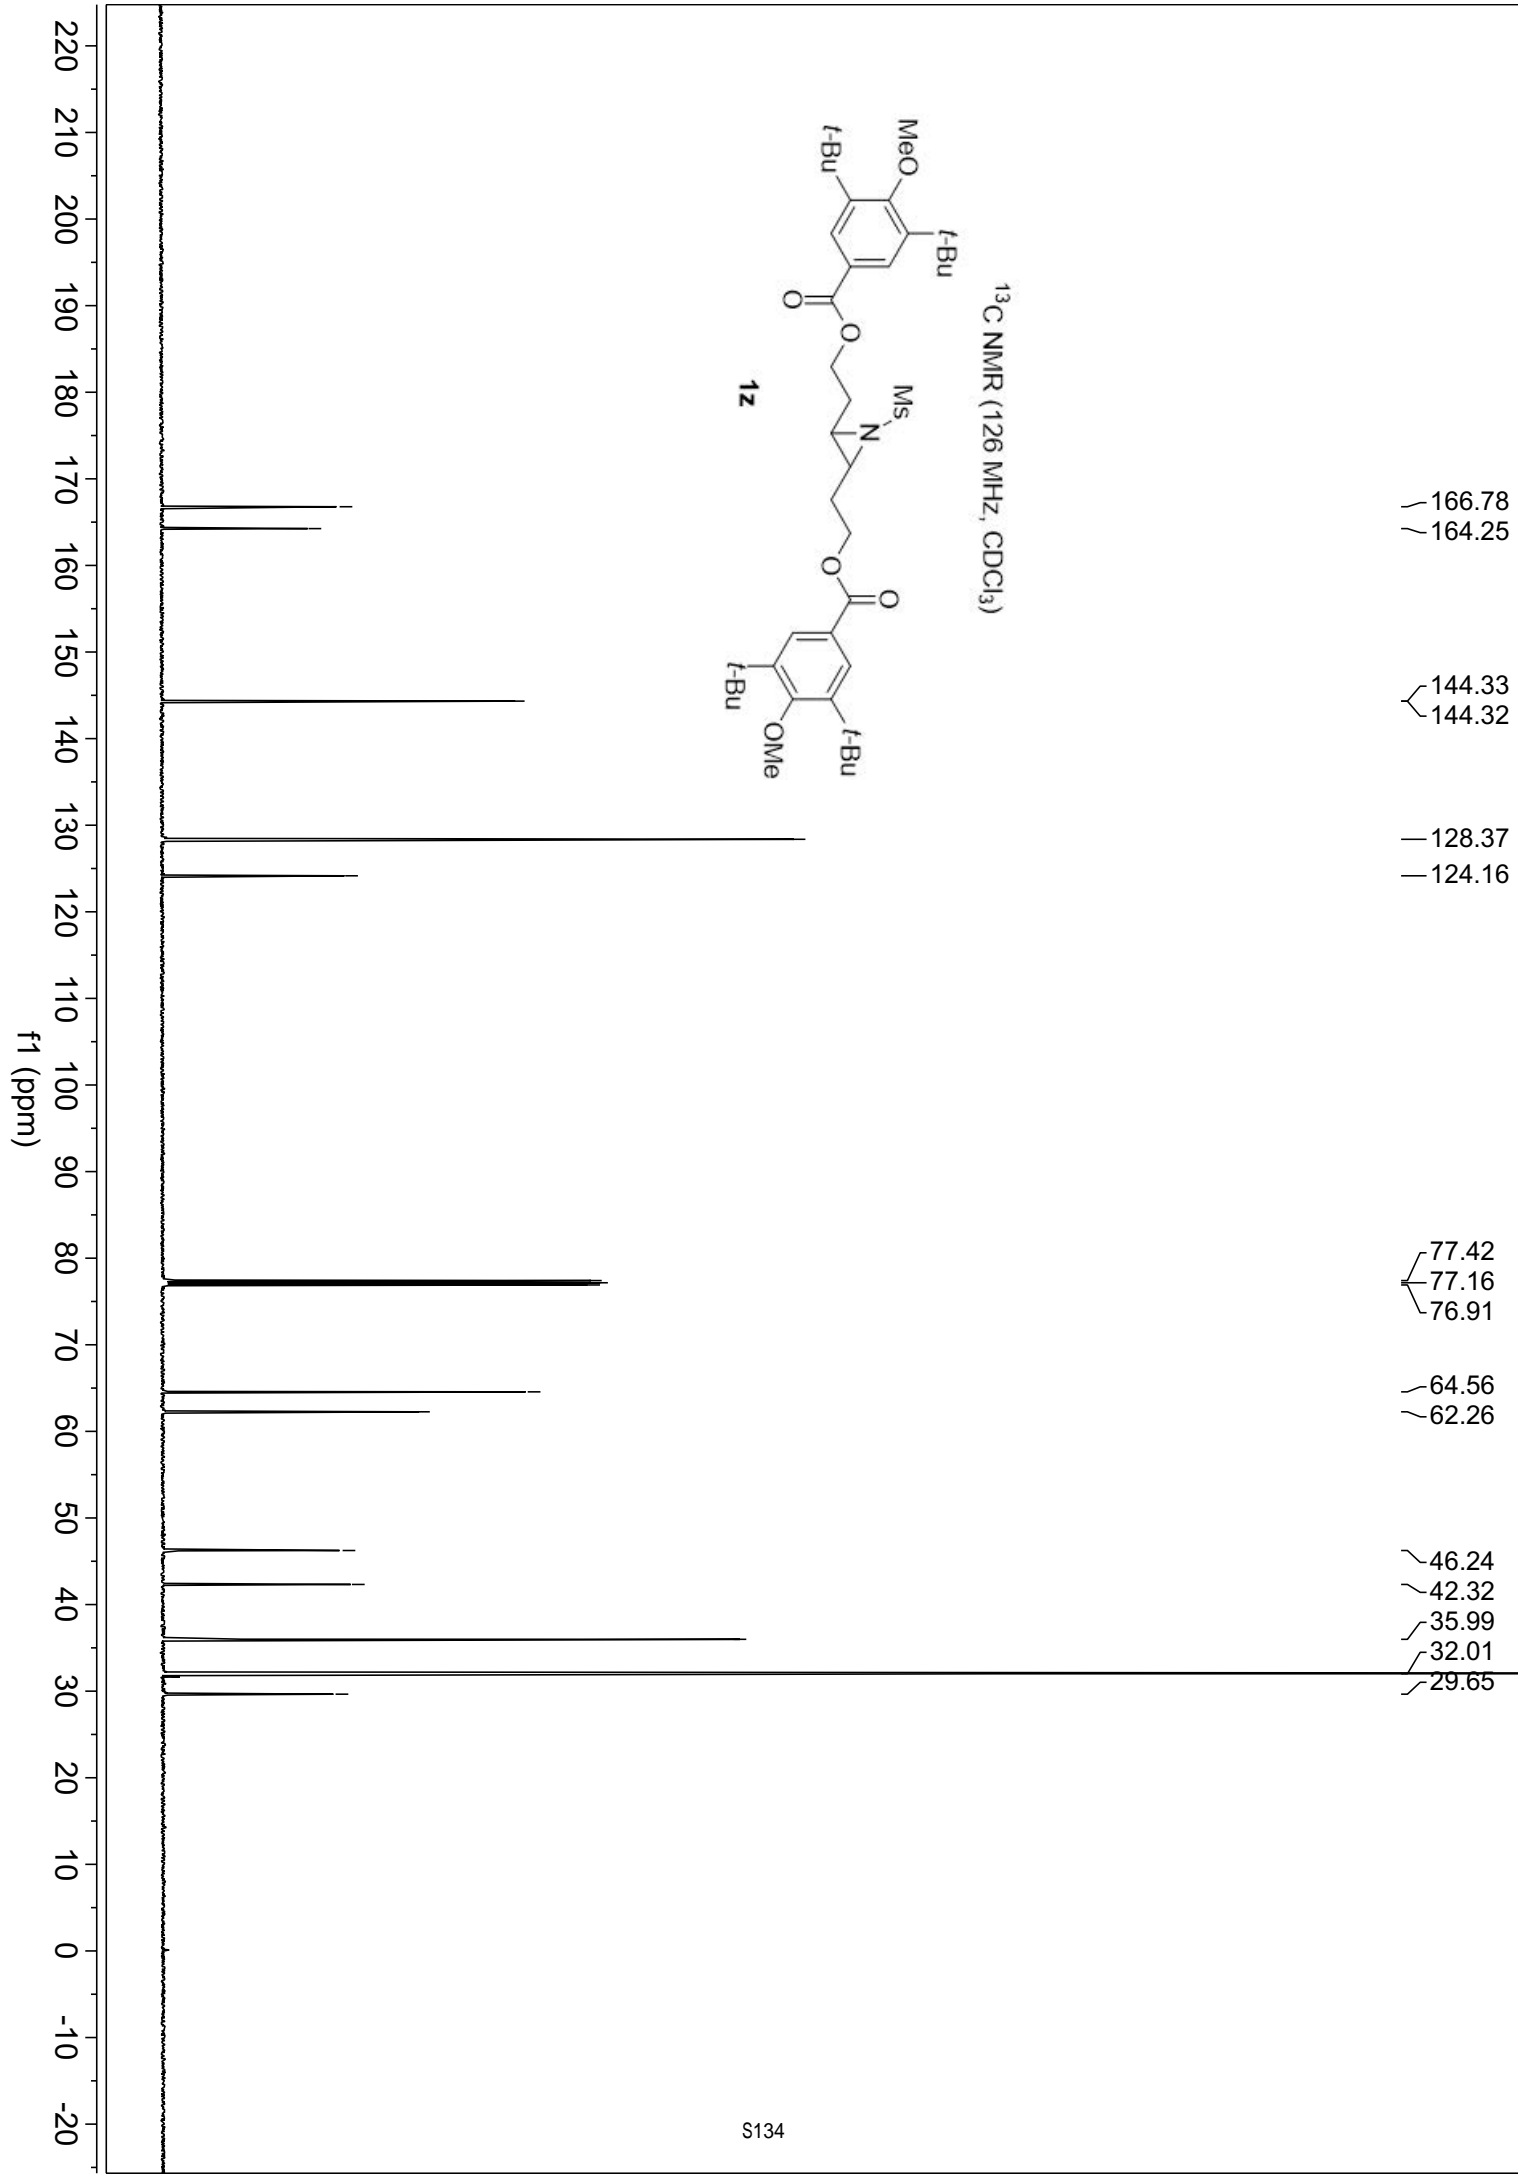

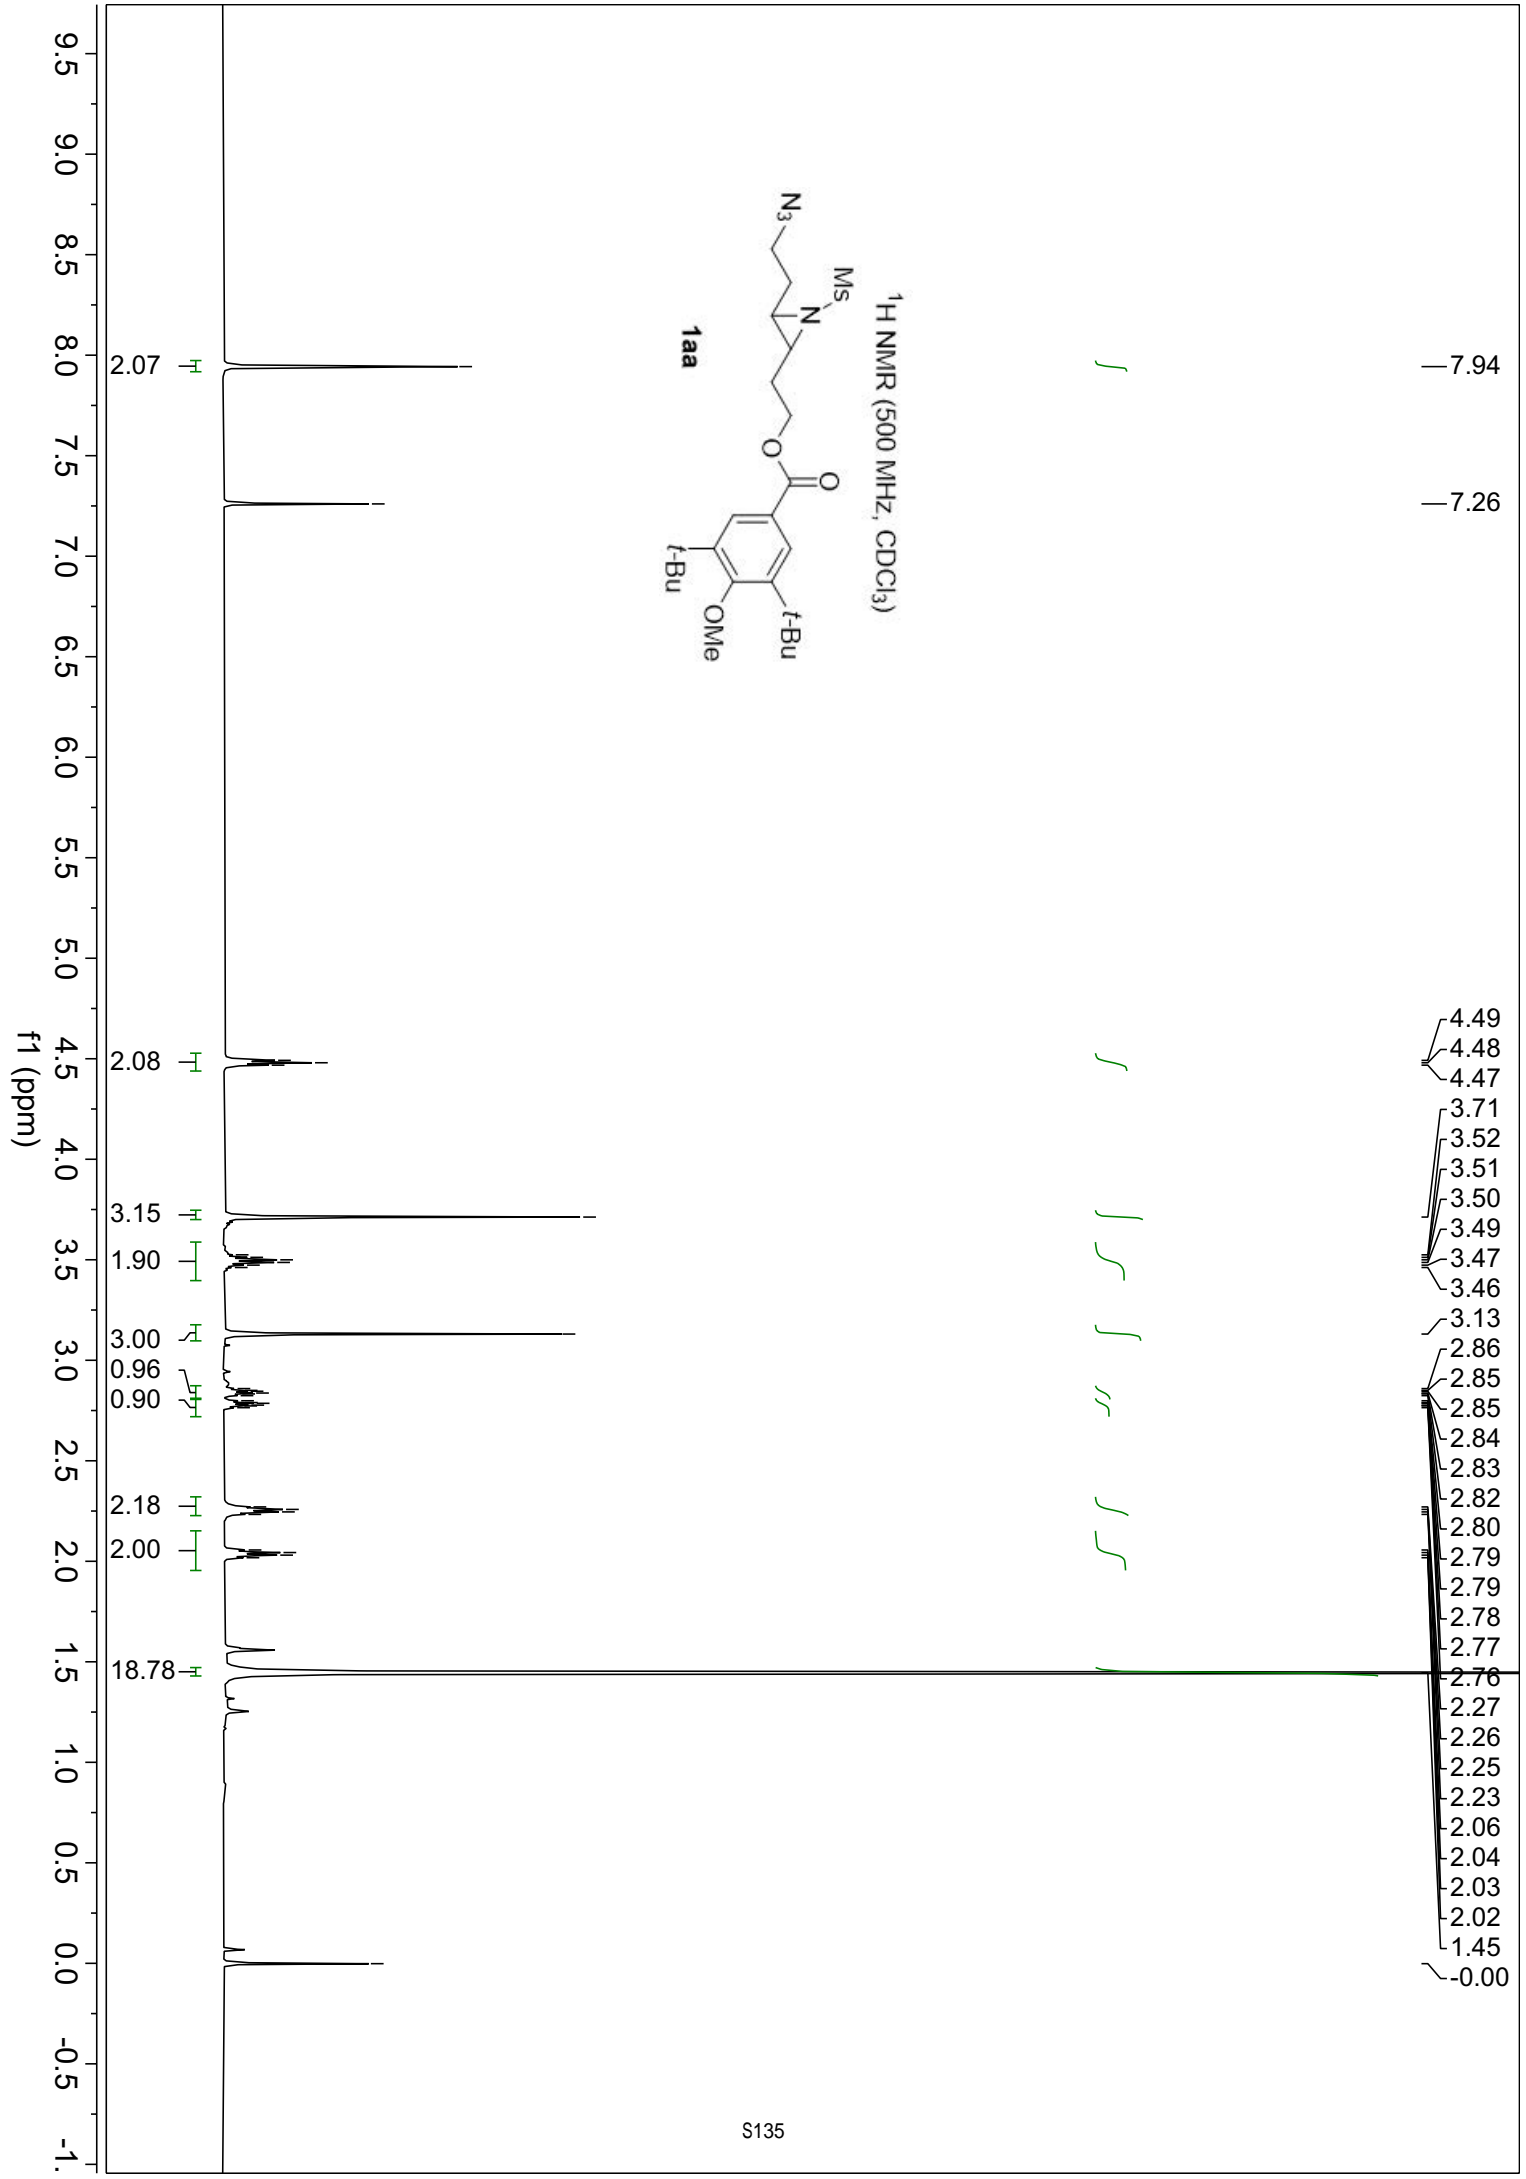

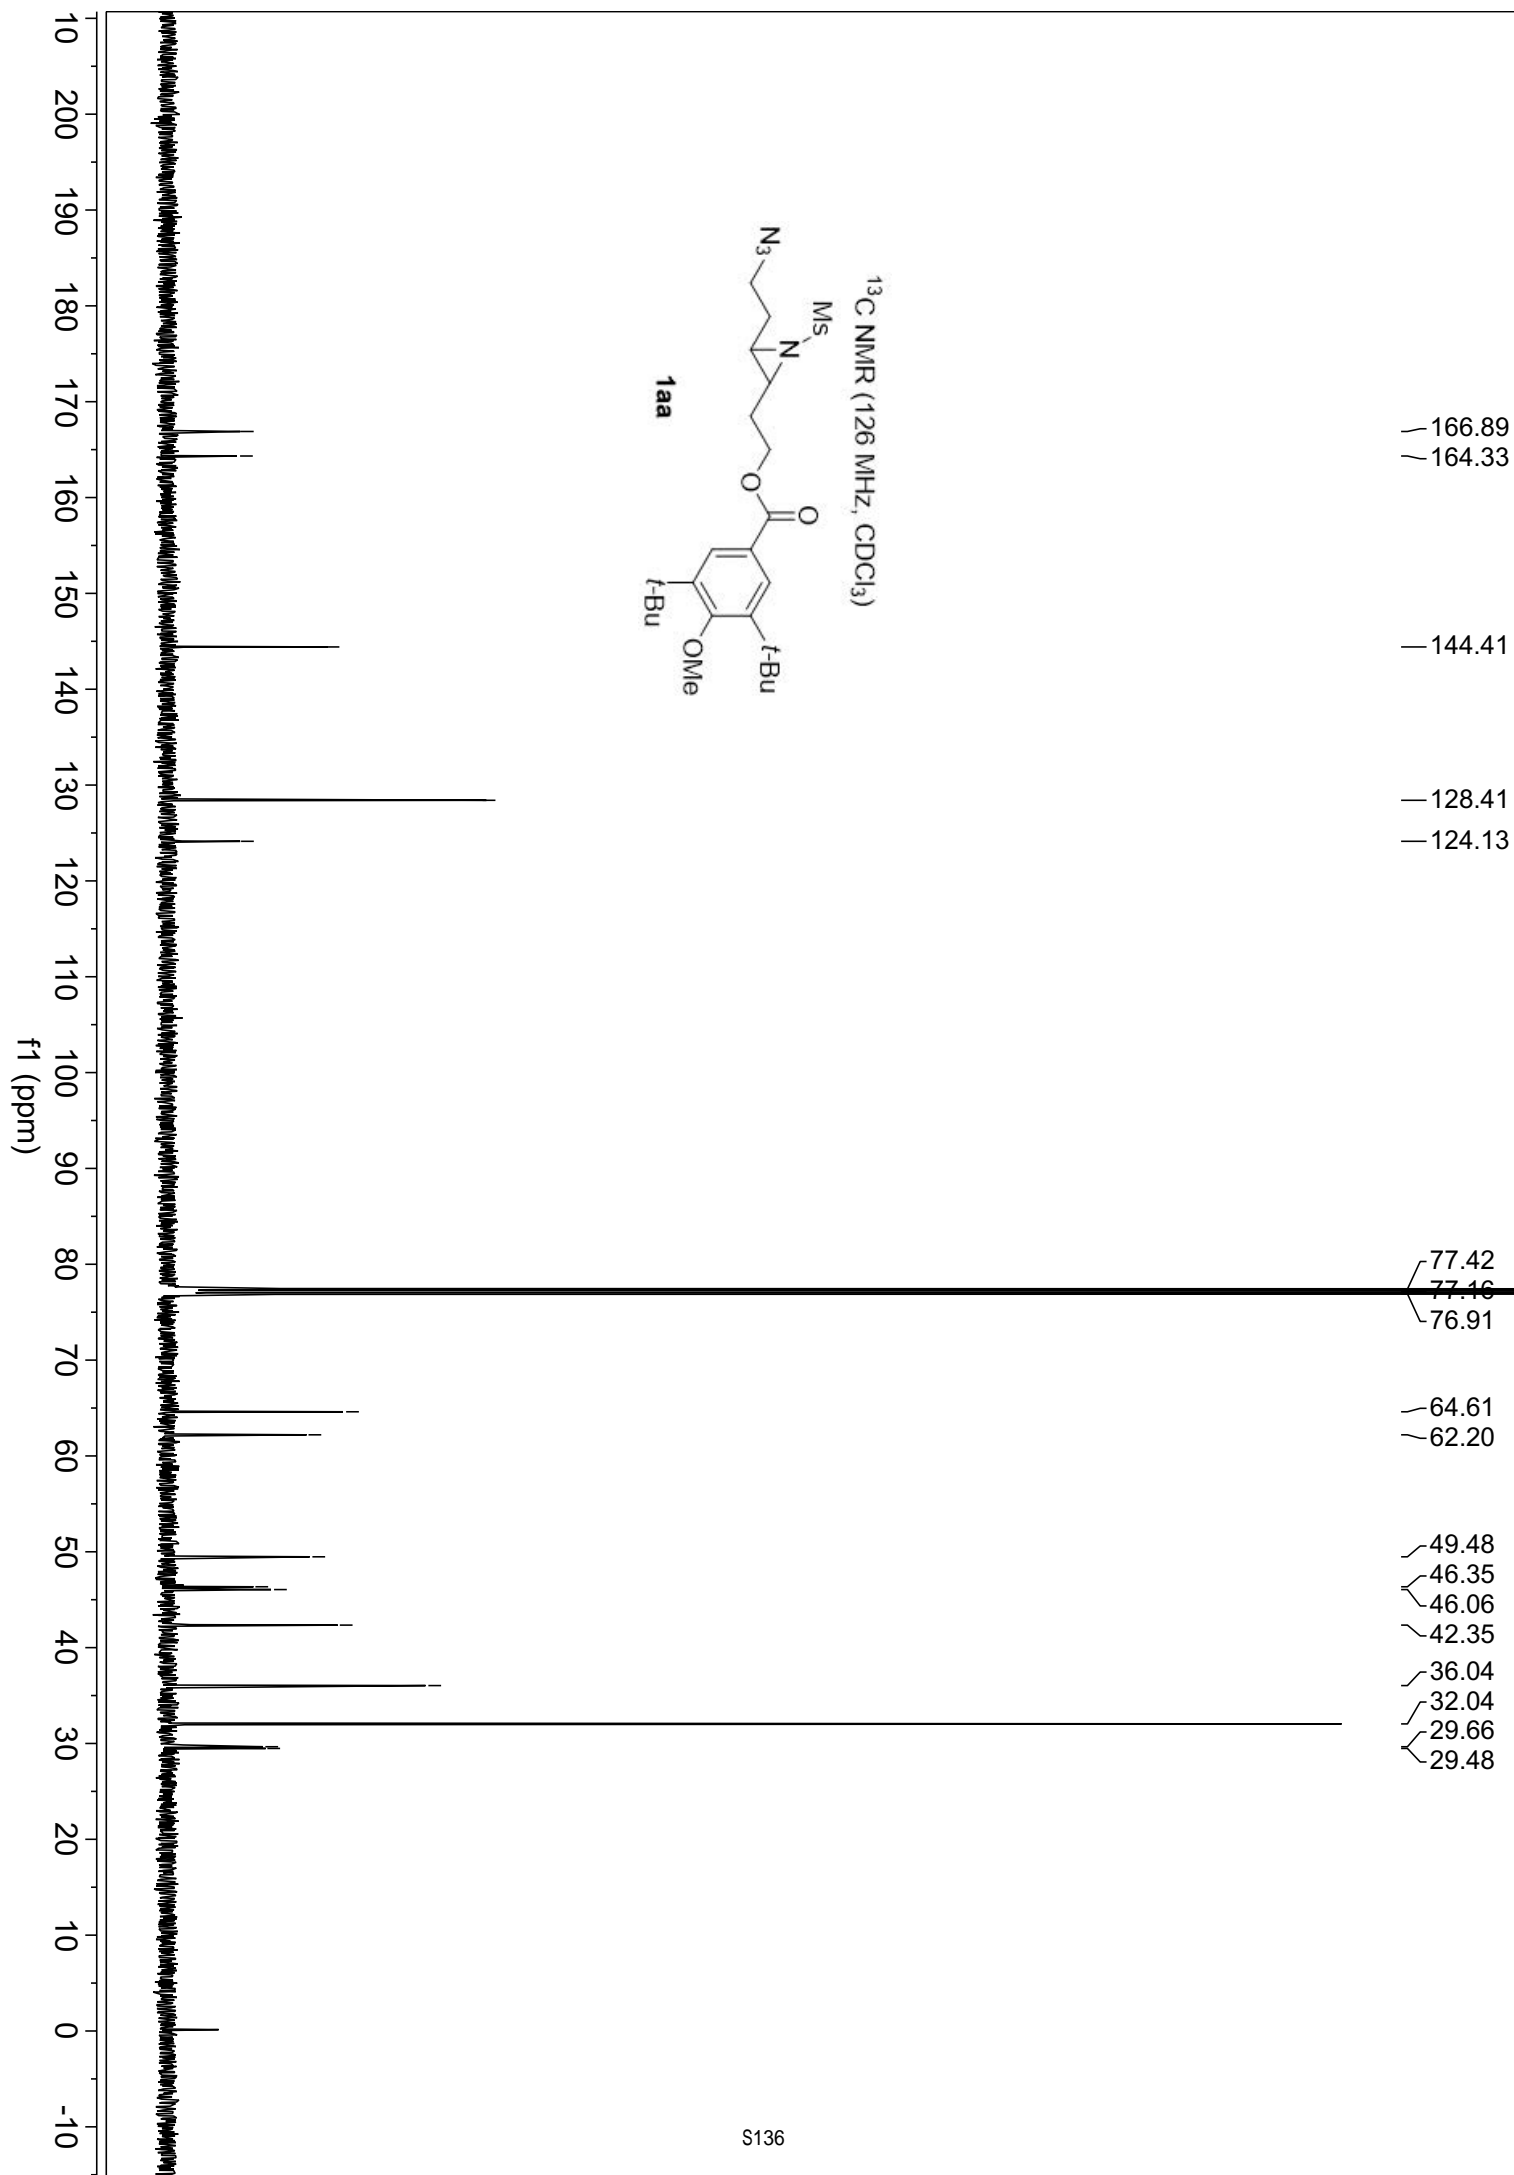



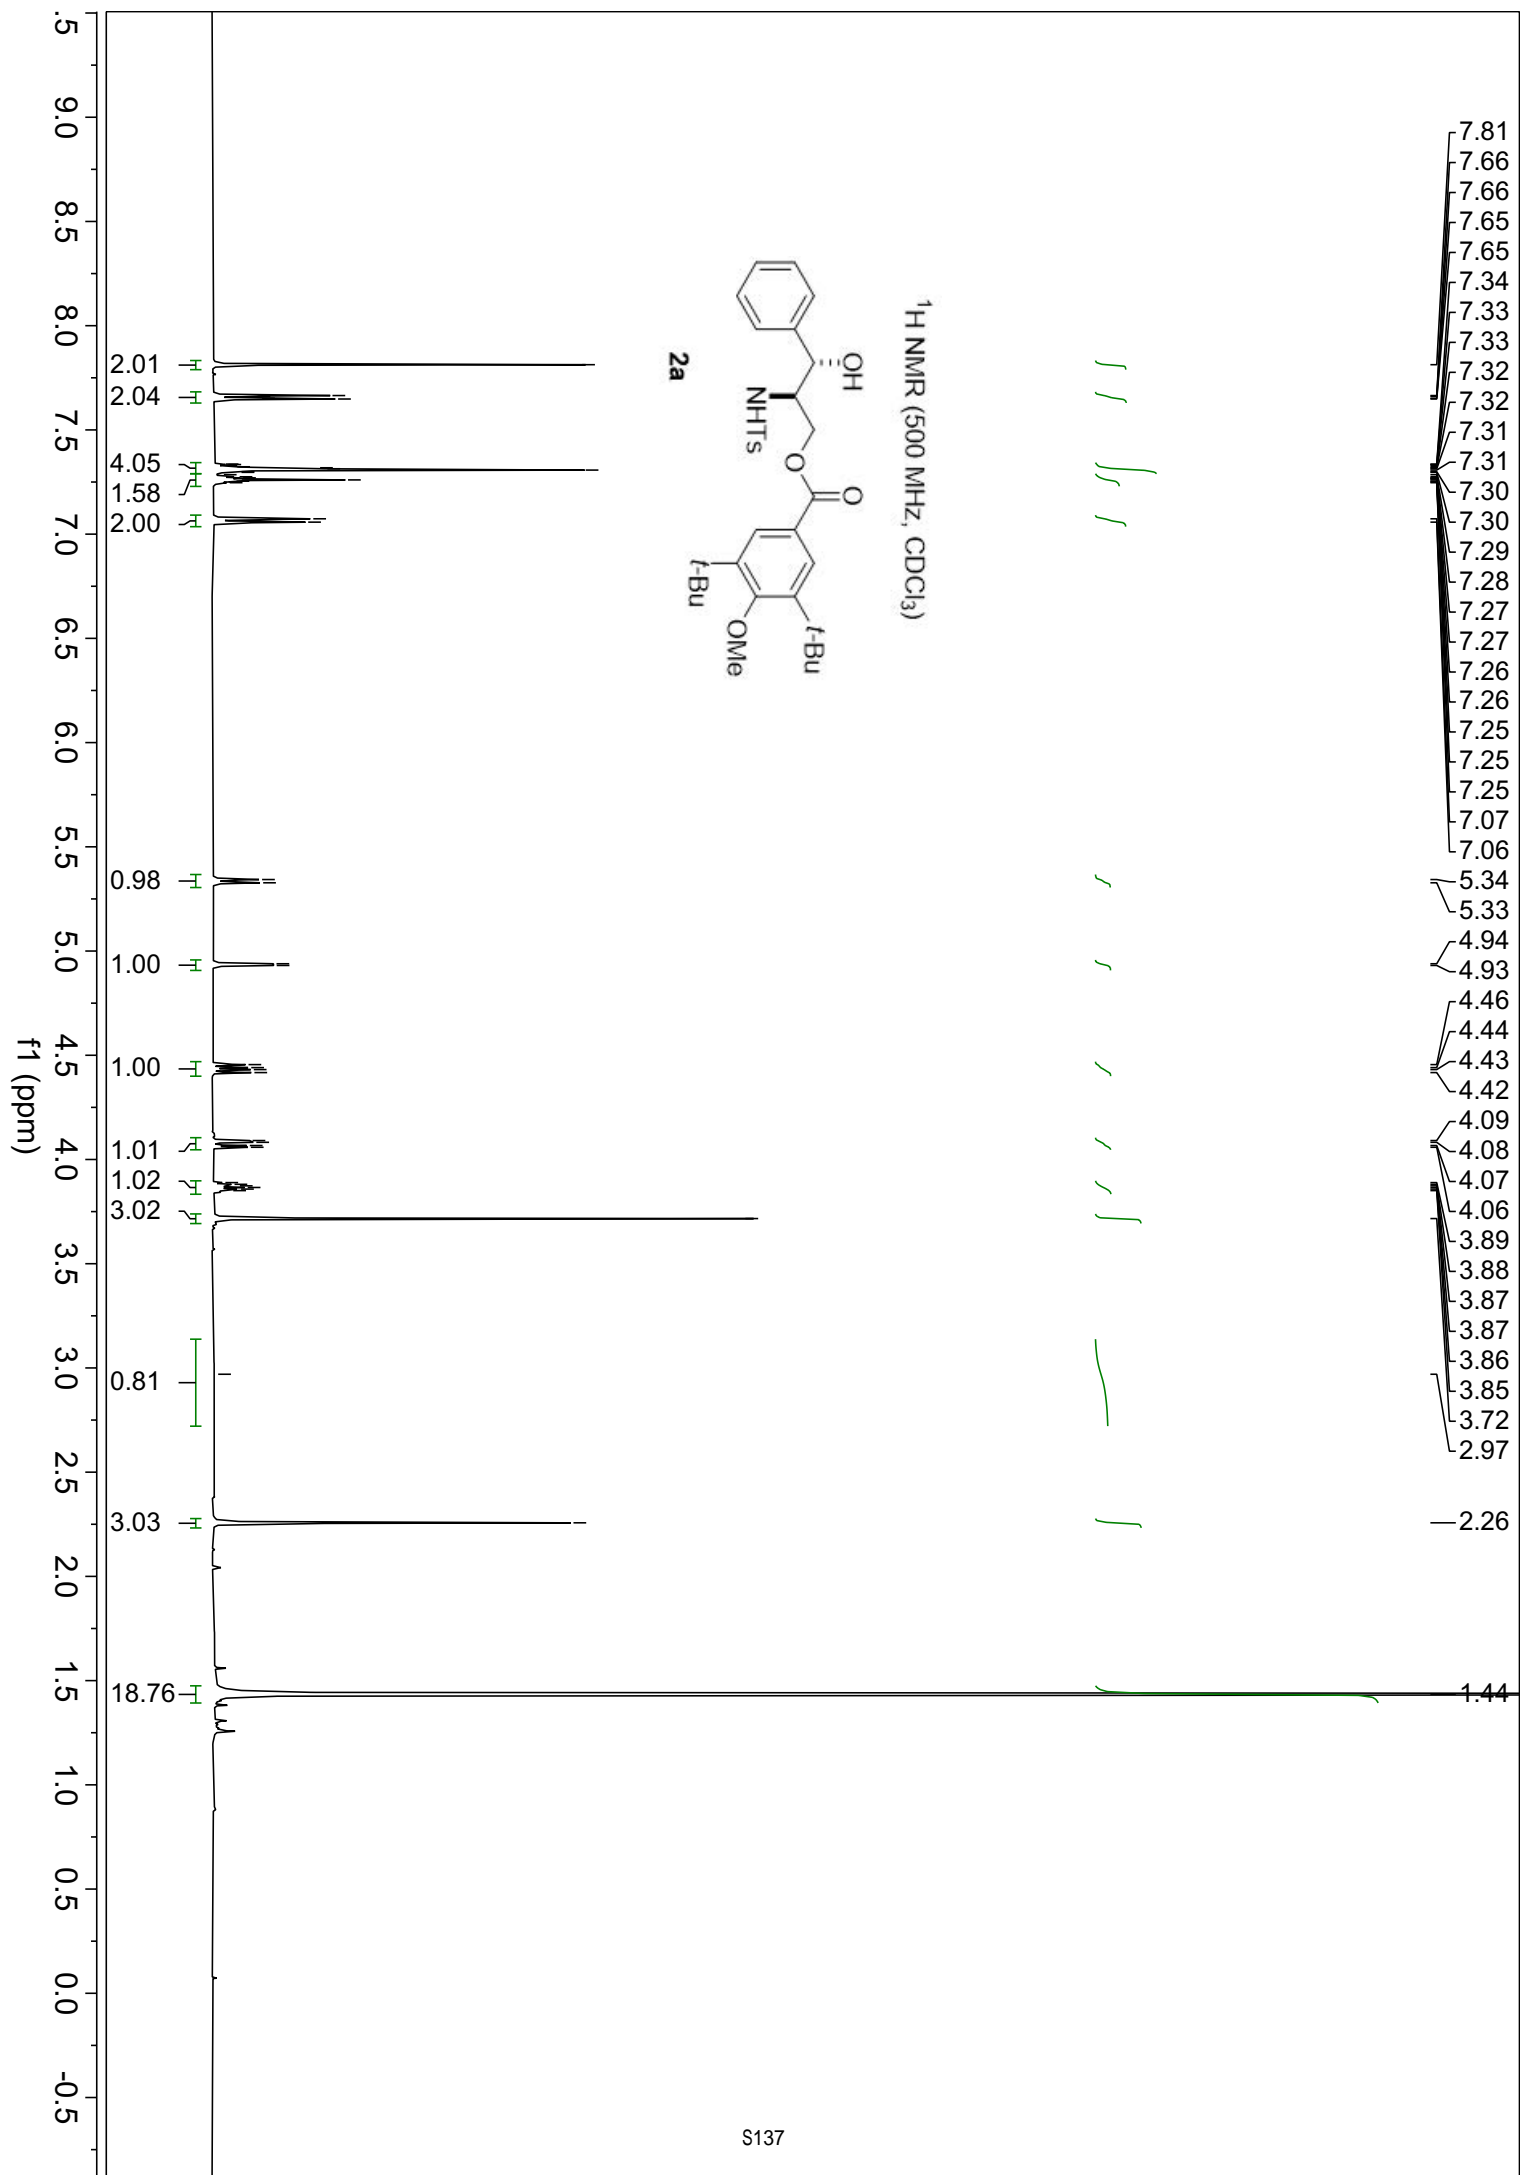

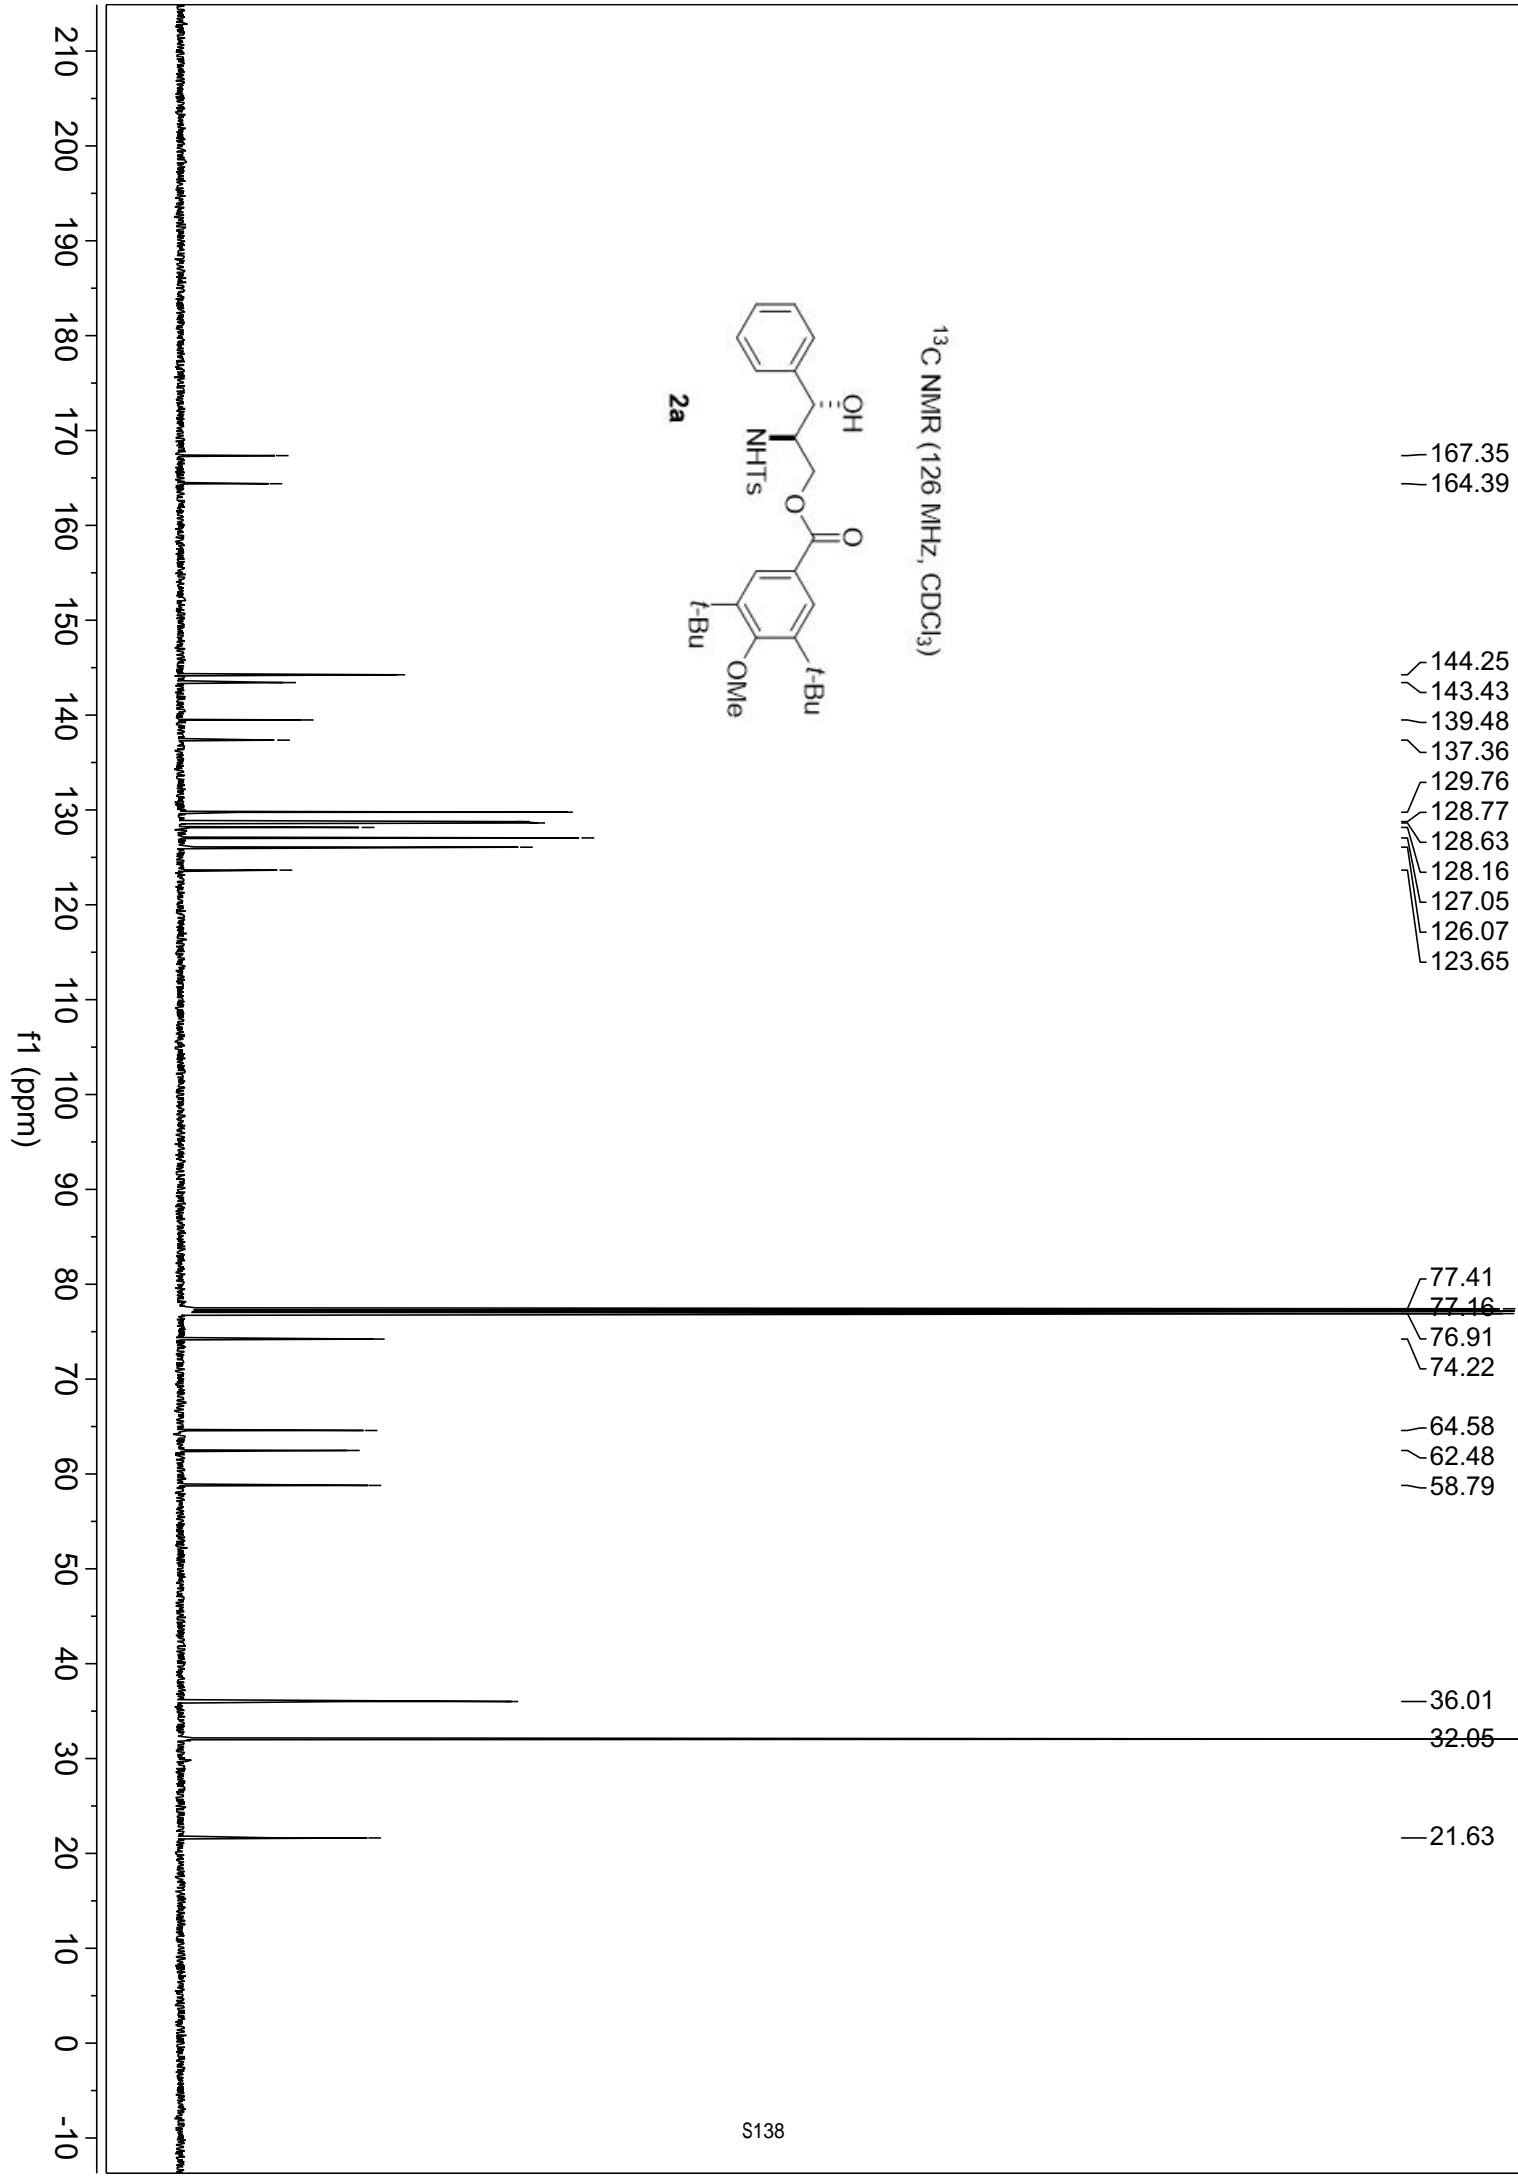

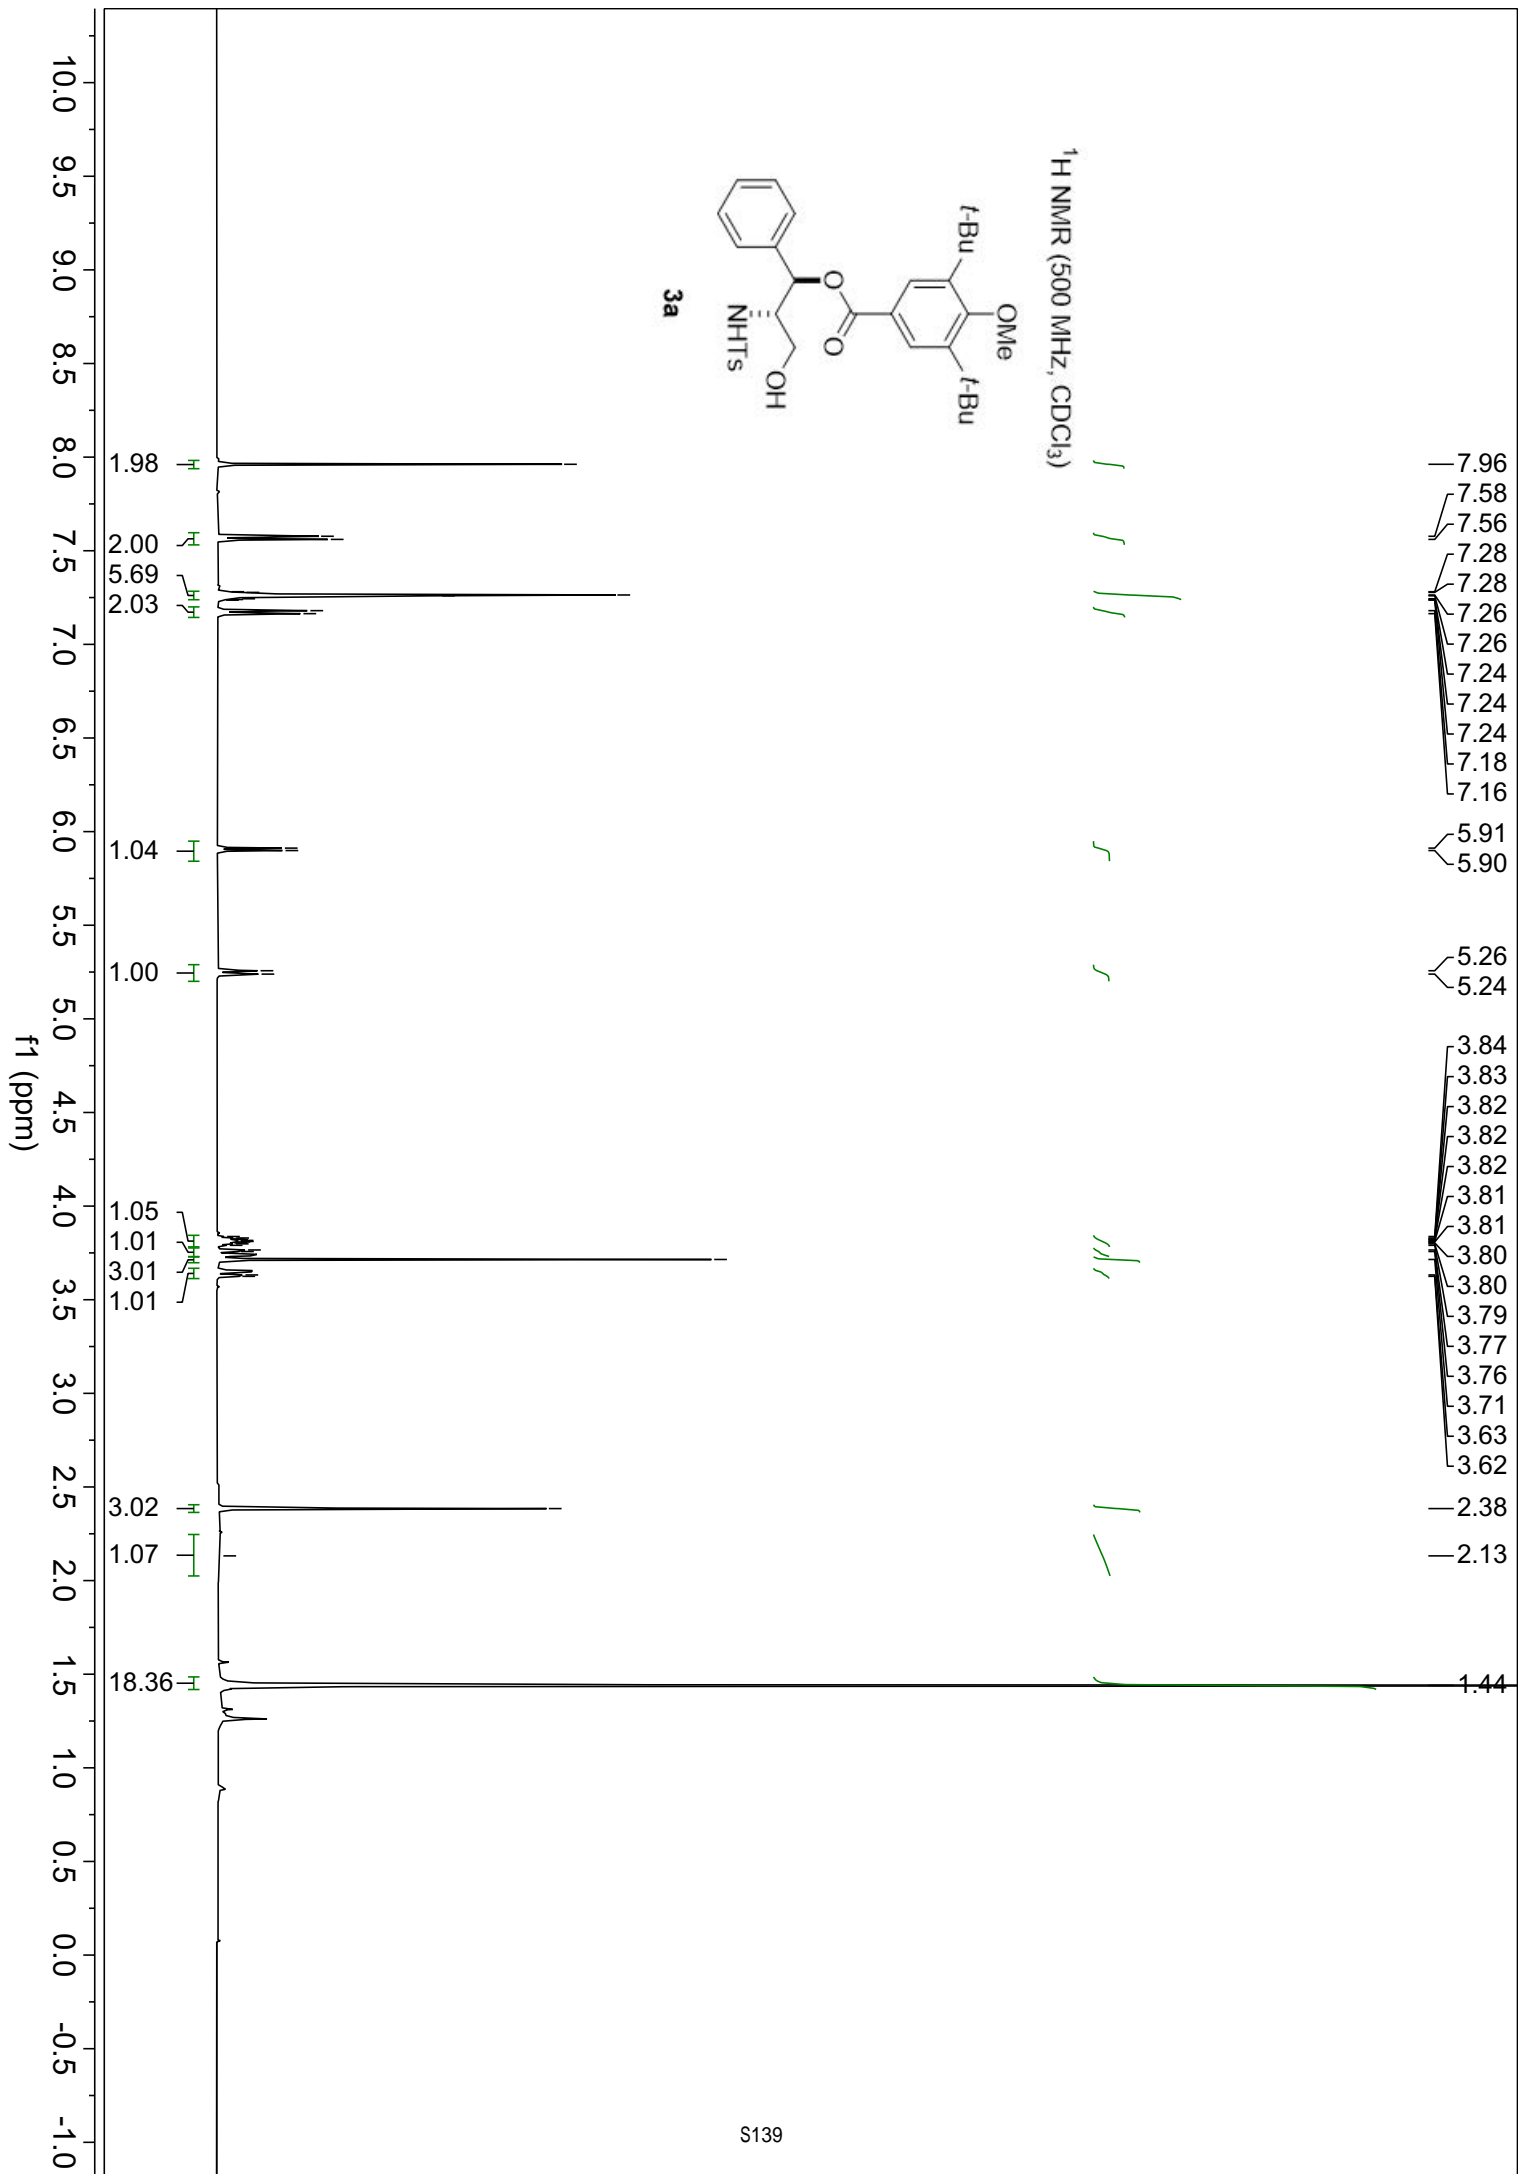

<sup>13</sup>C NMR (126 MHz, CDCl<sub>3</sub>)

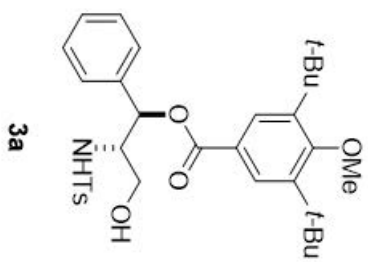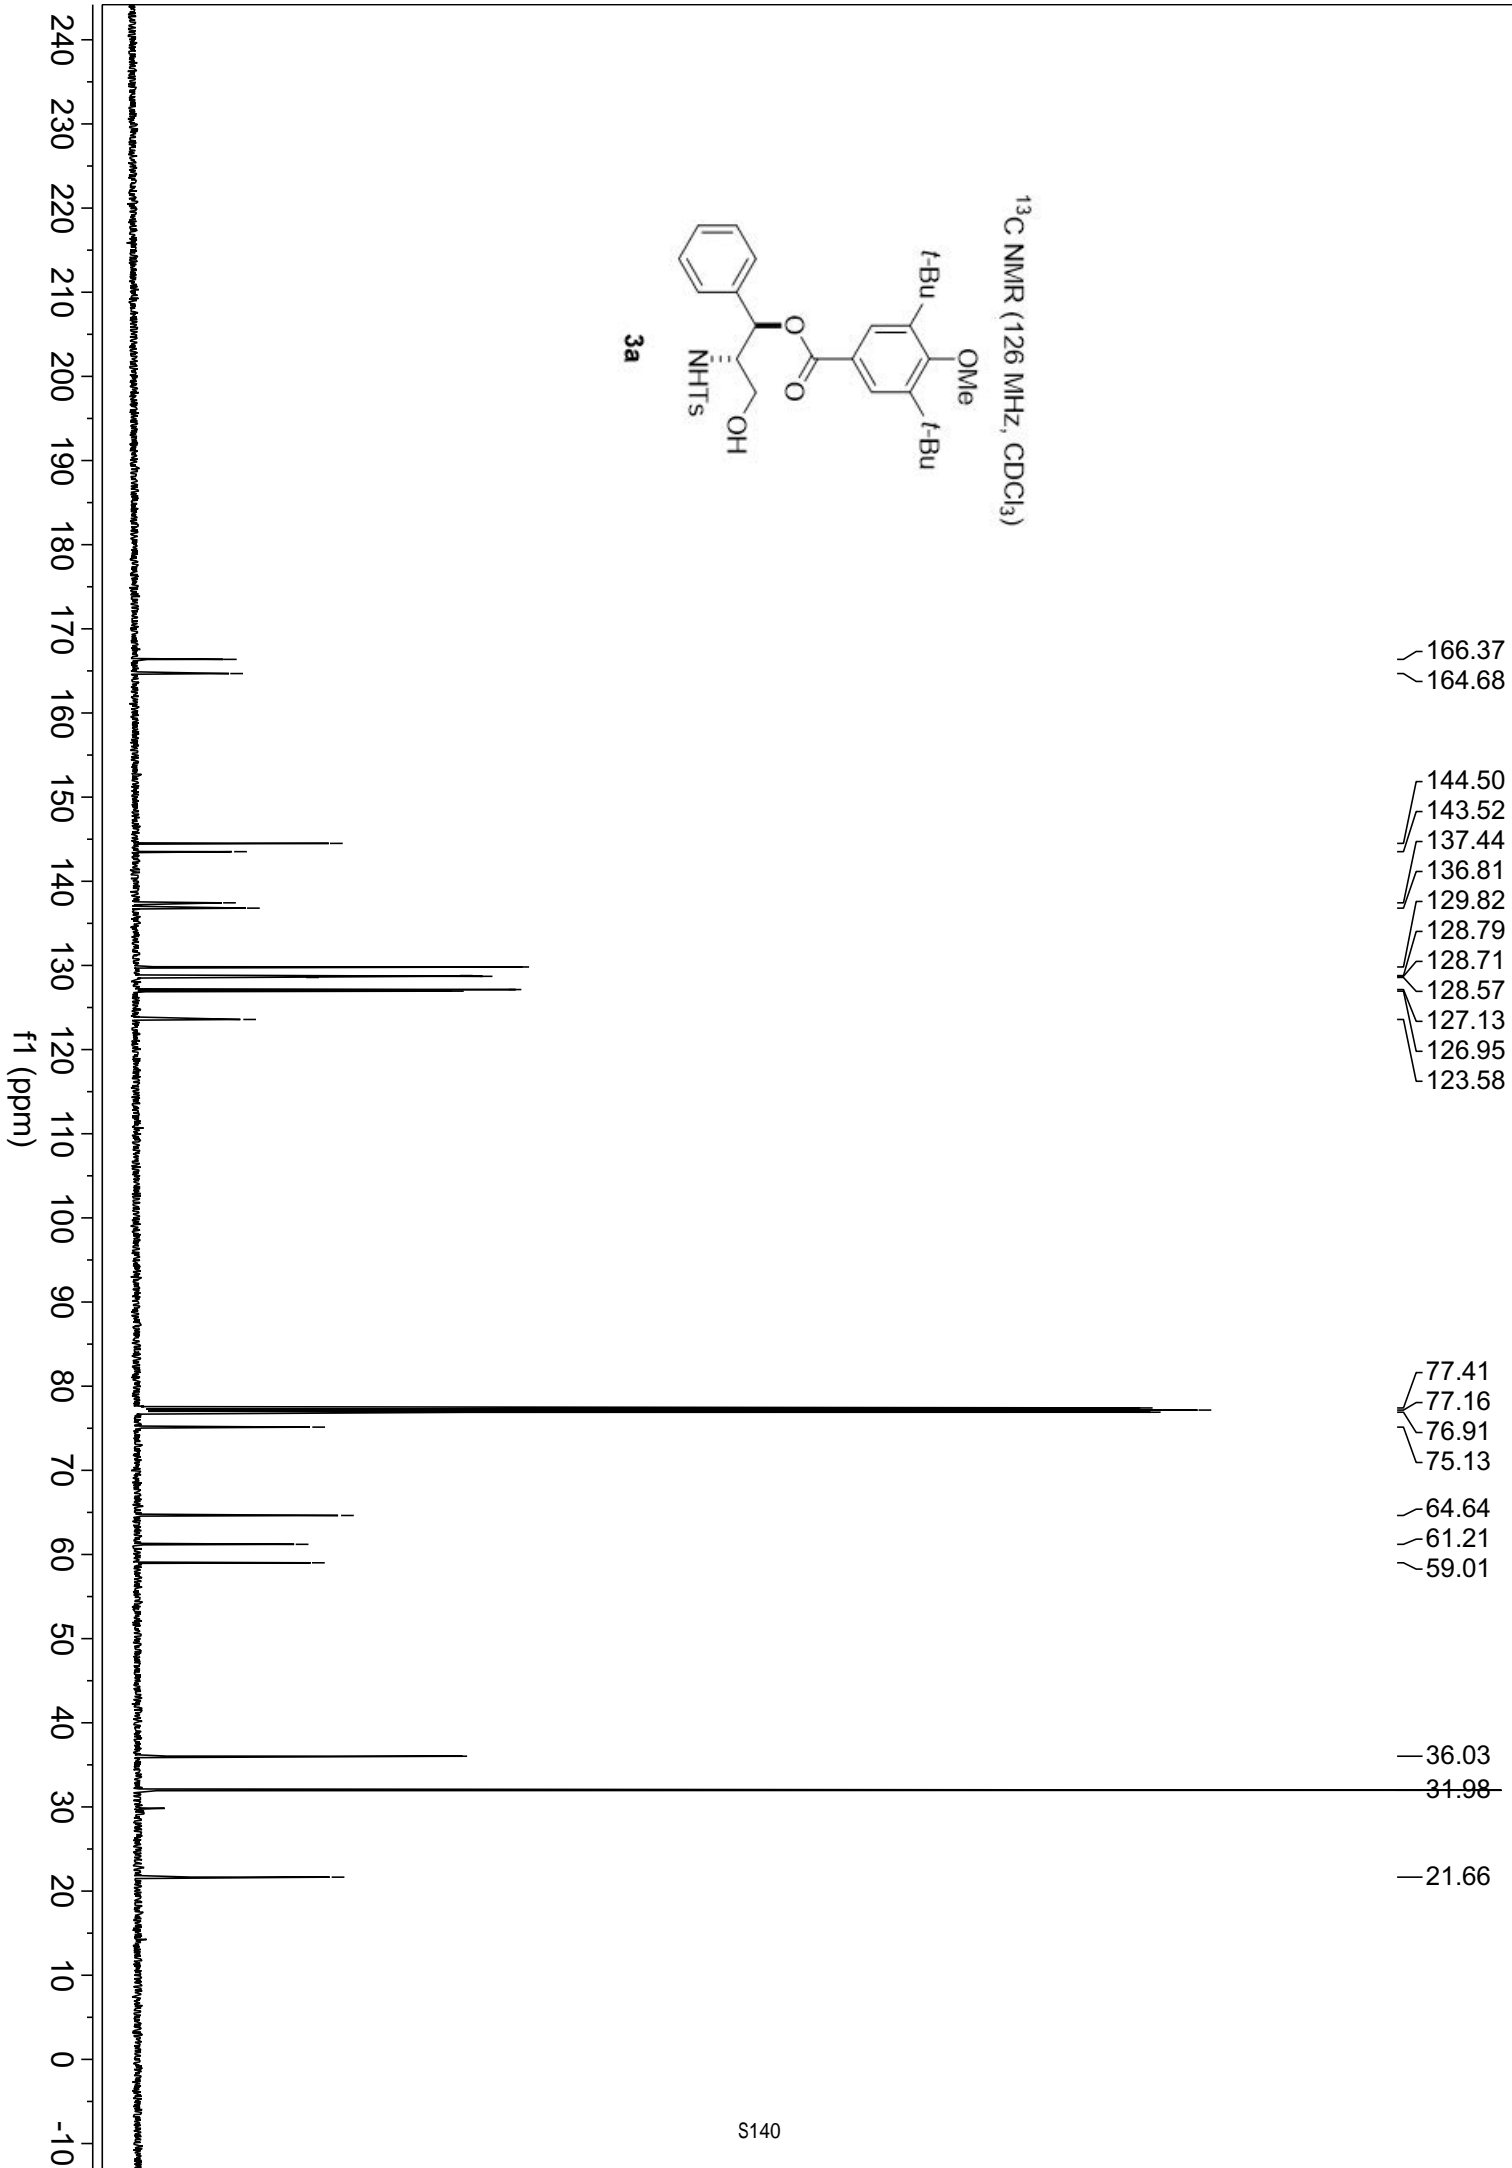

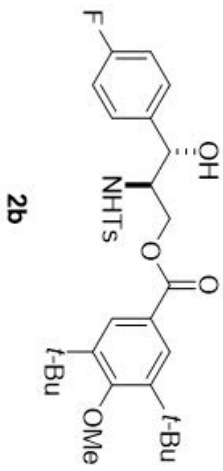

<sup>1</sup>H NMR (500 MHz, CDCl<sub>3</sub>)

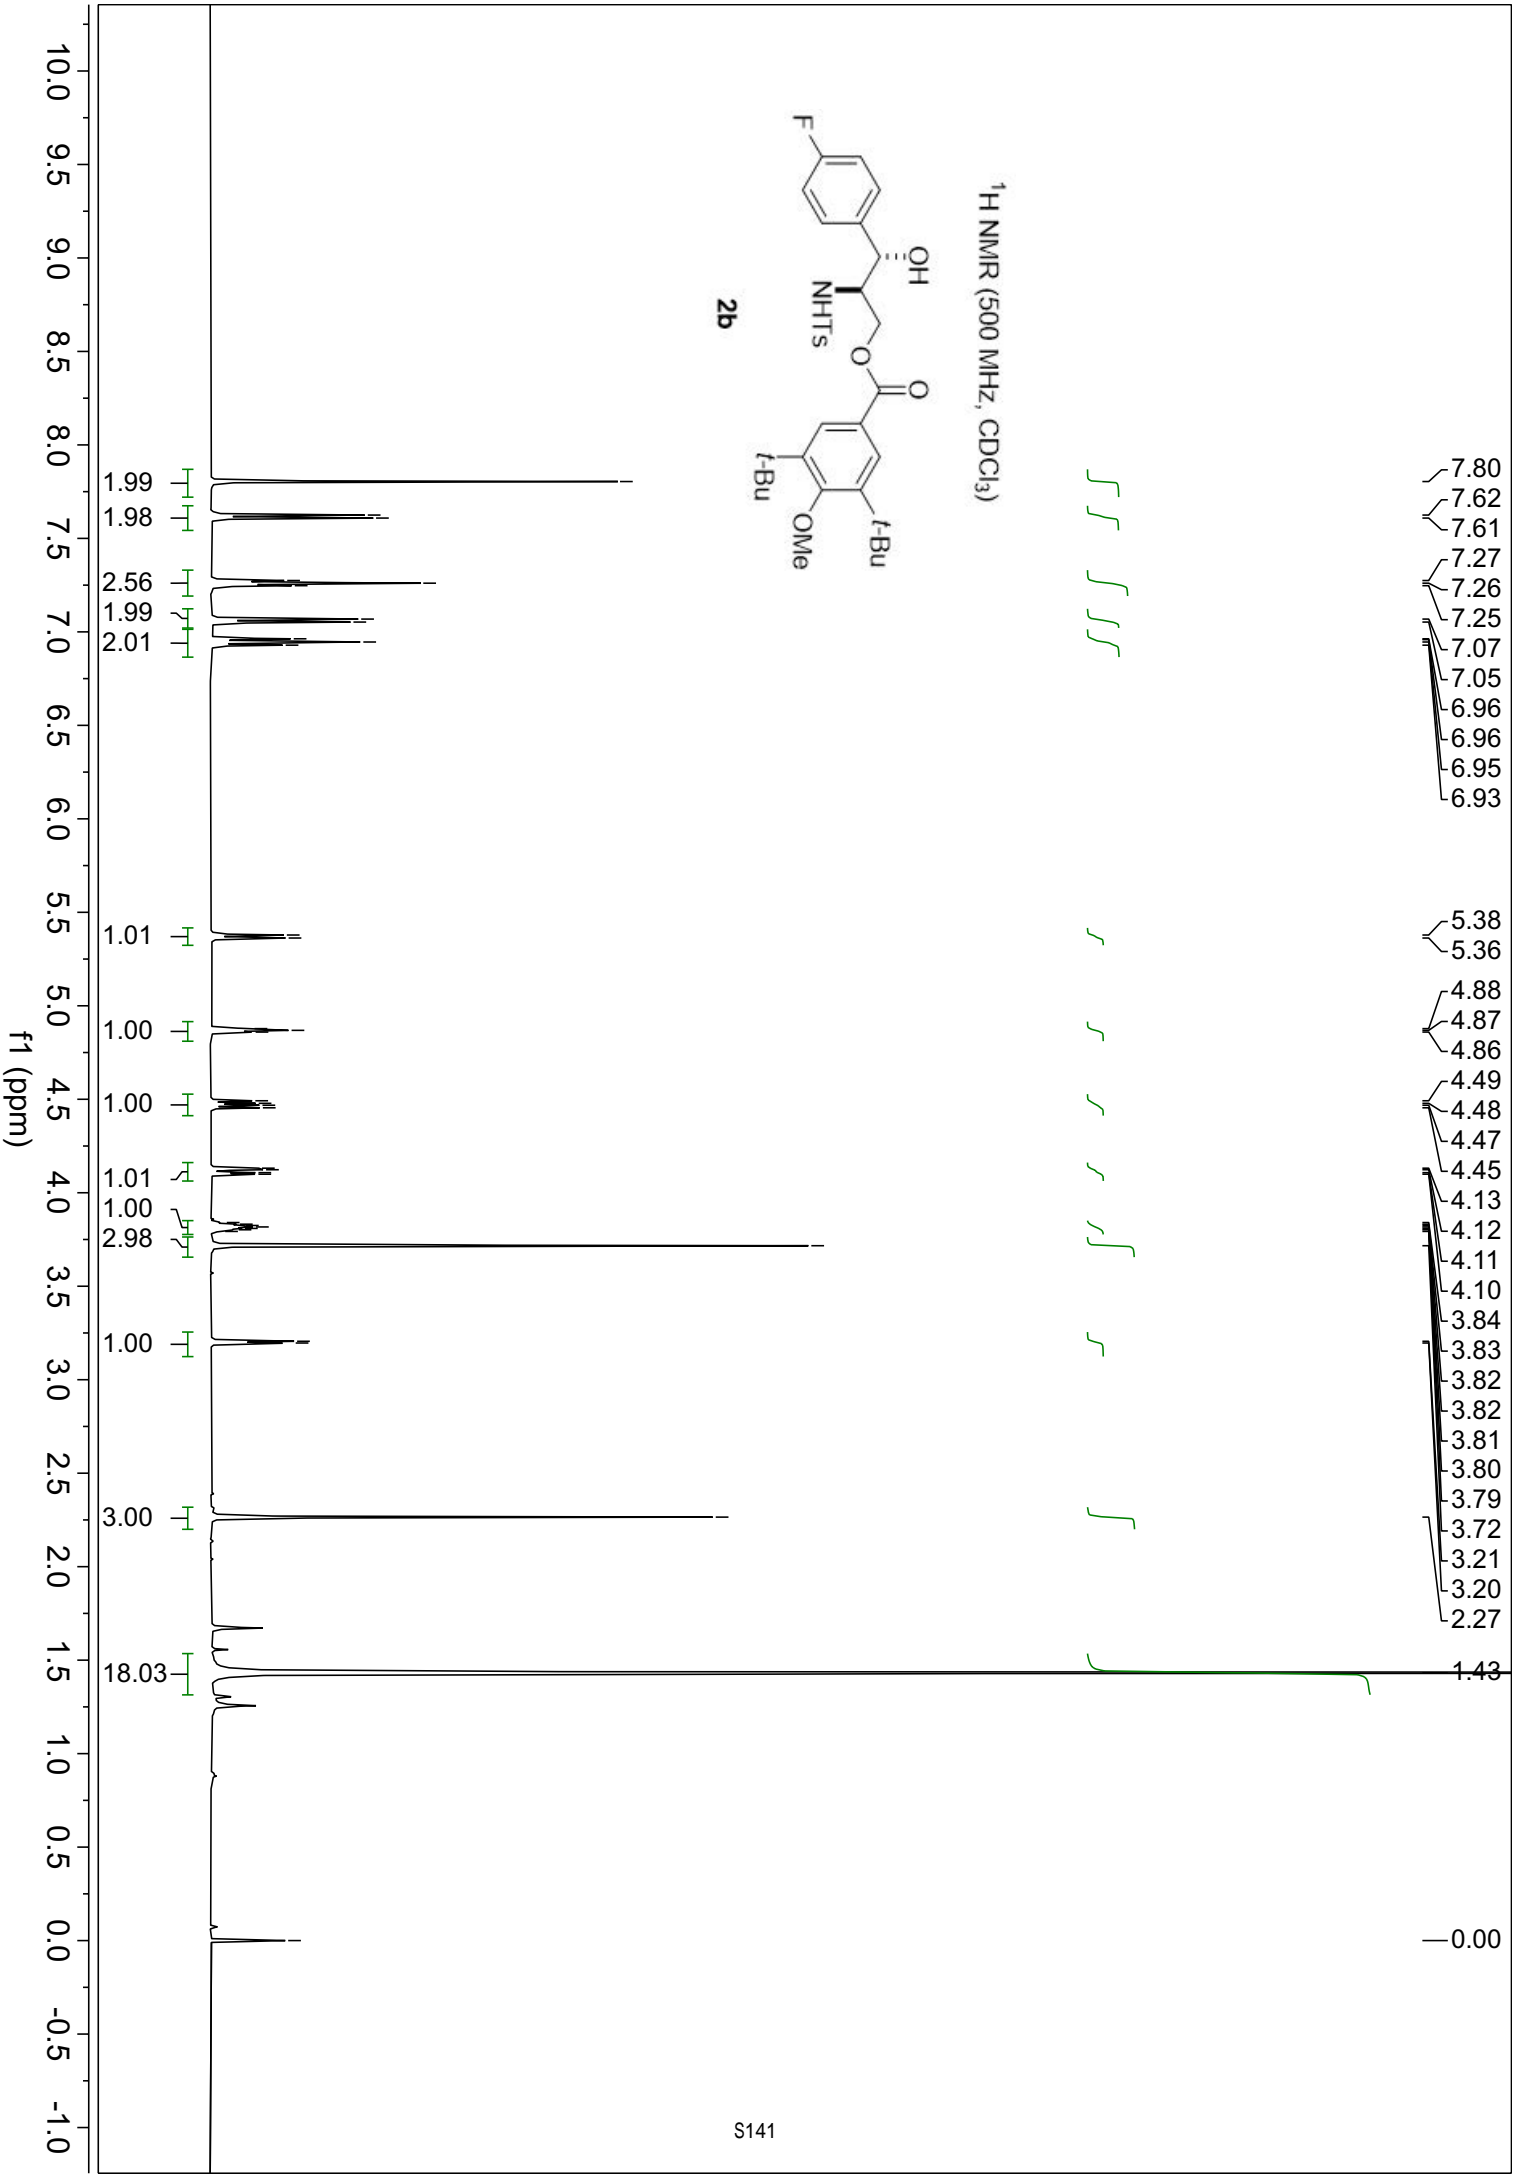

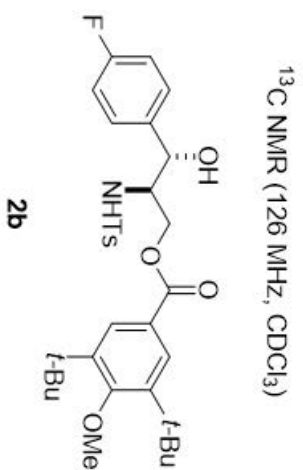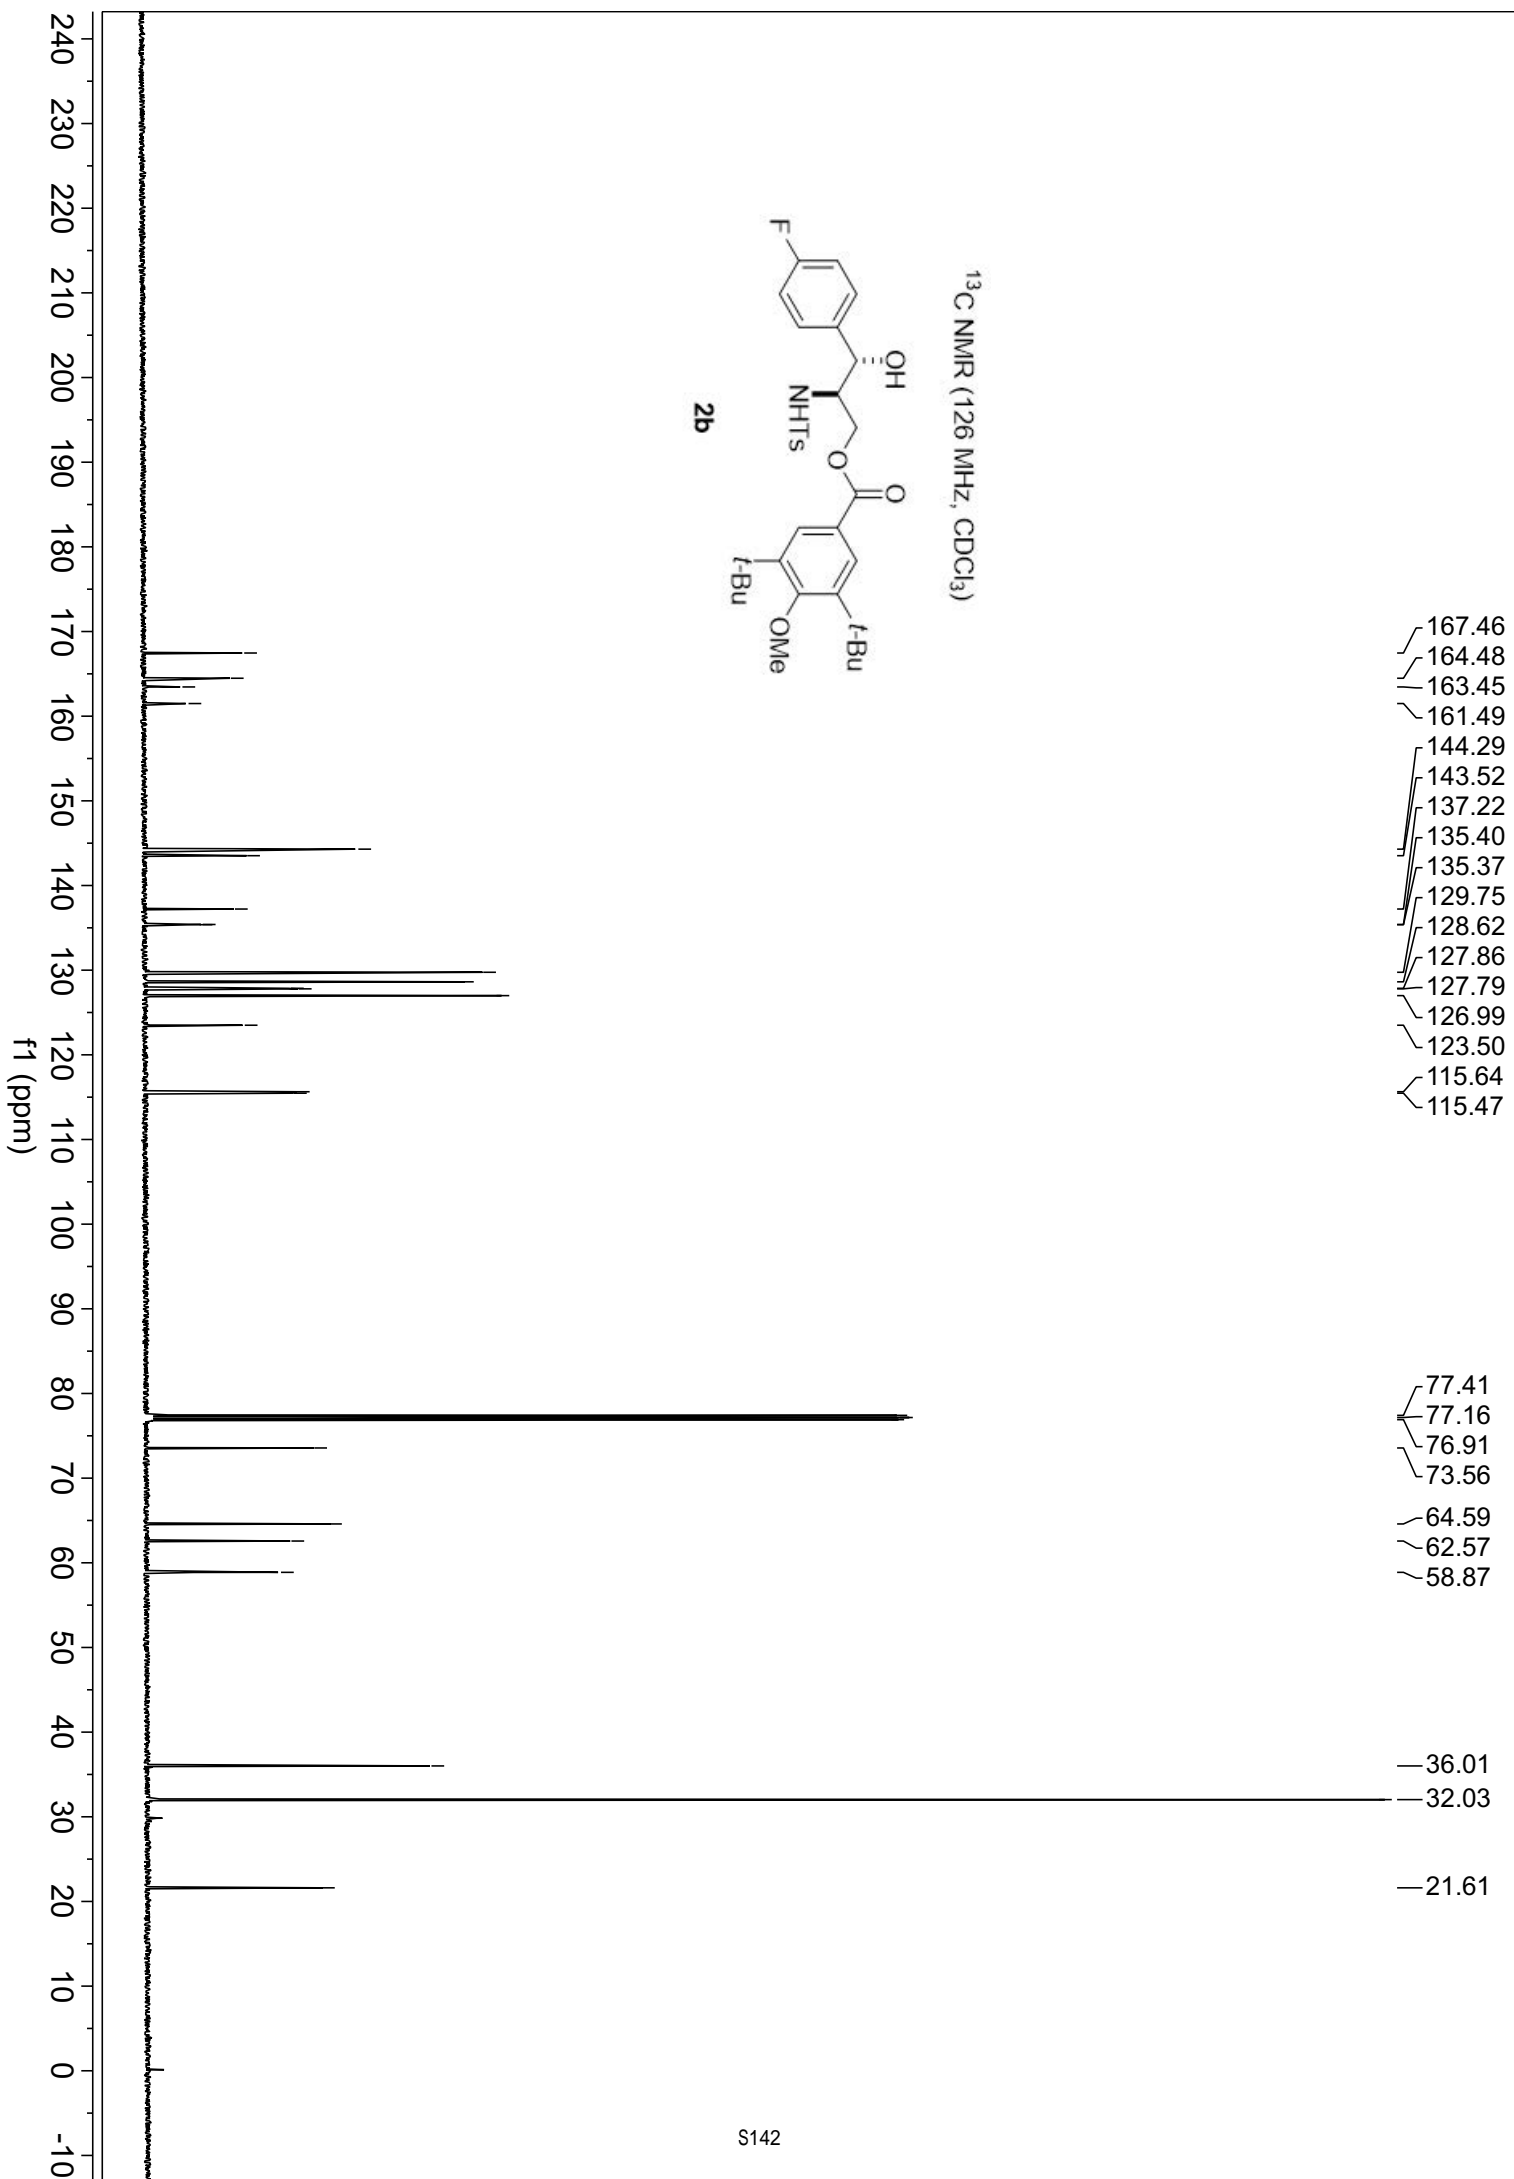

--114.07

<sup>19</sup>F NMR (471 MHz, CDCl<sub>3</sub>)

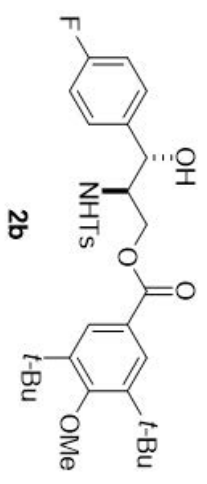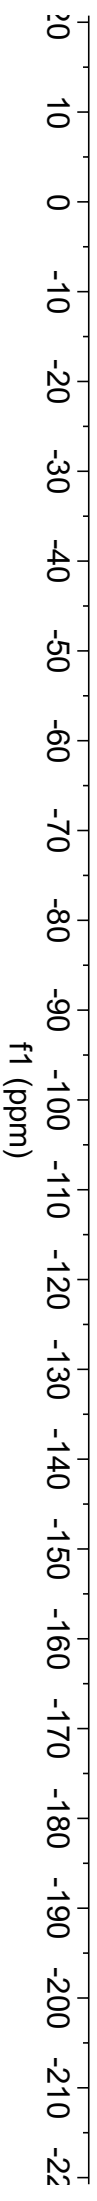

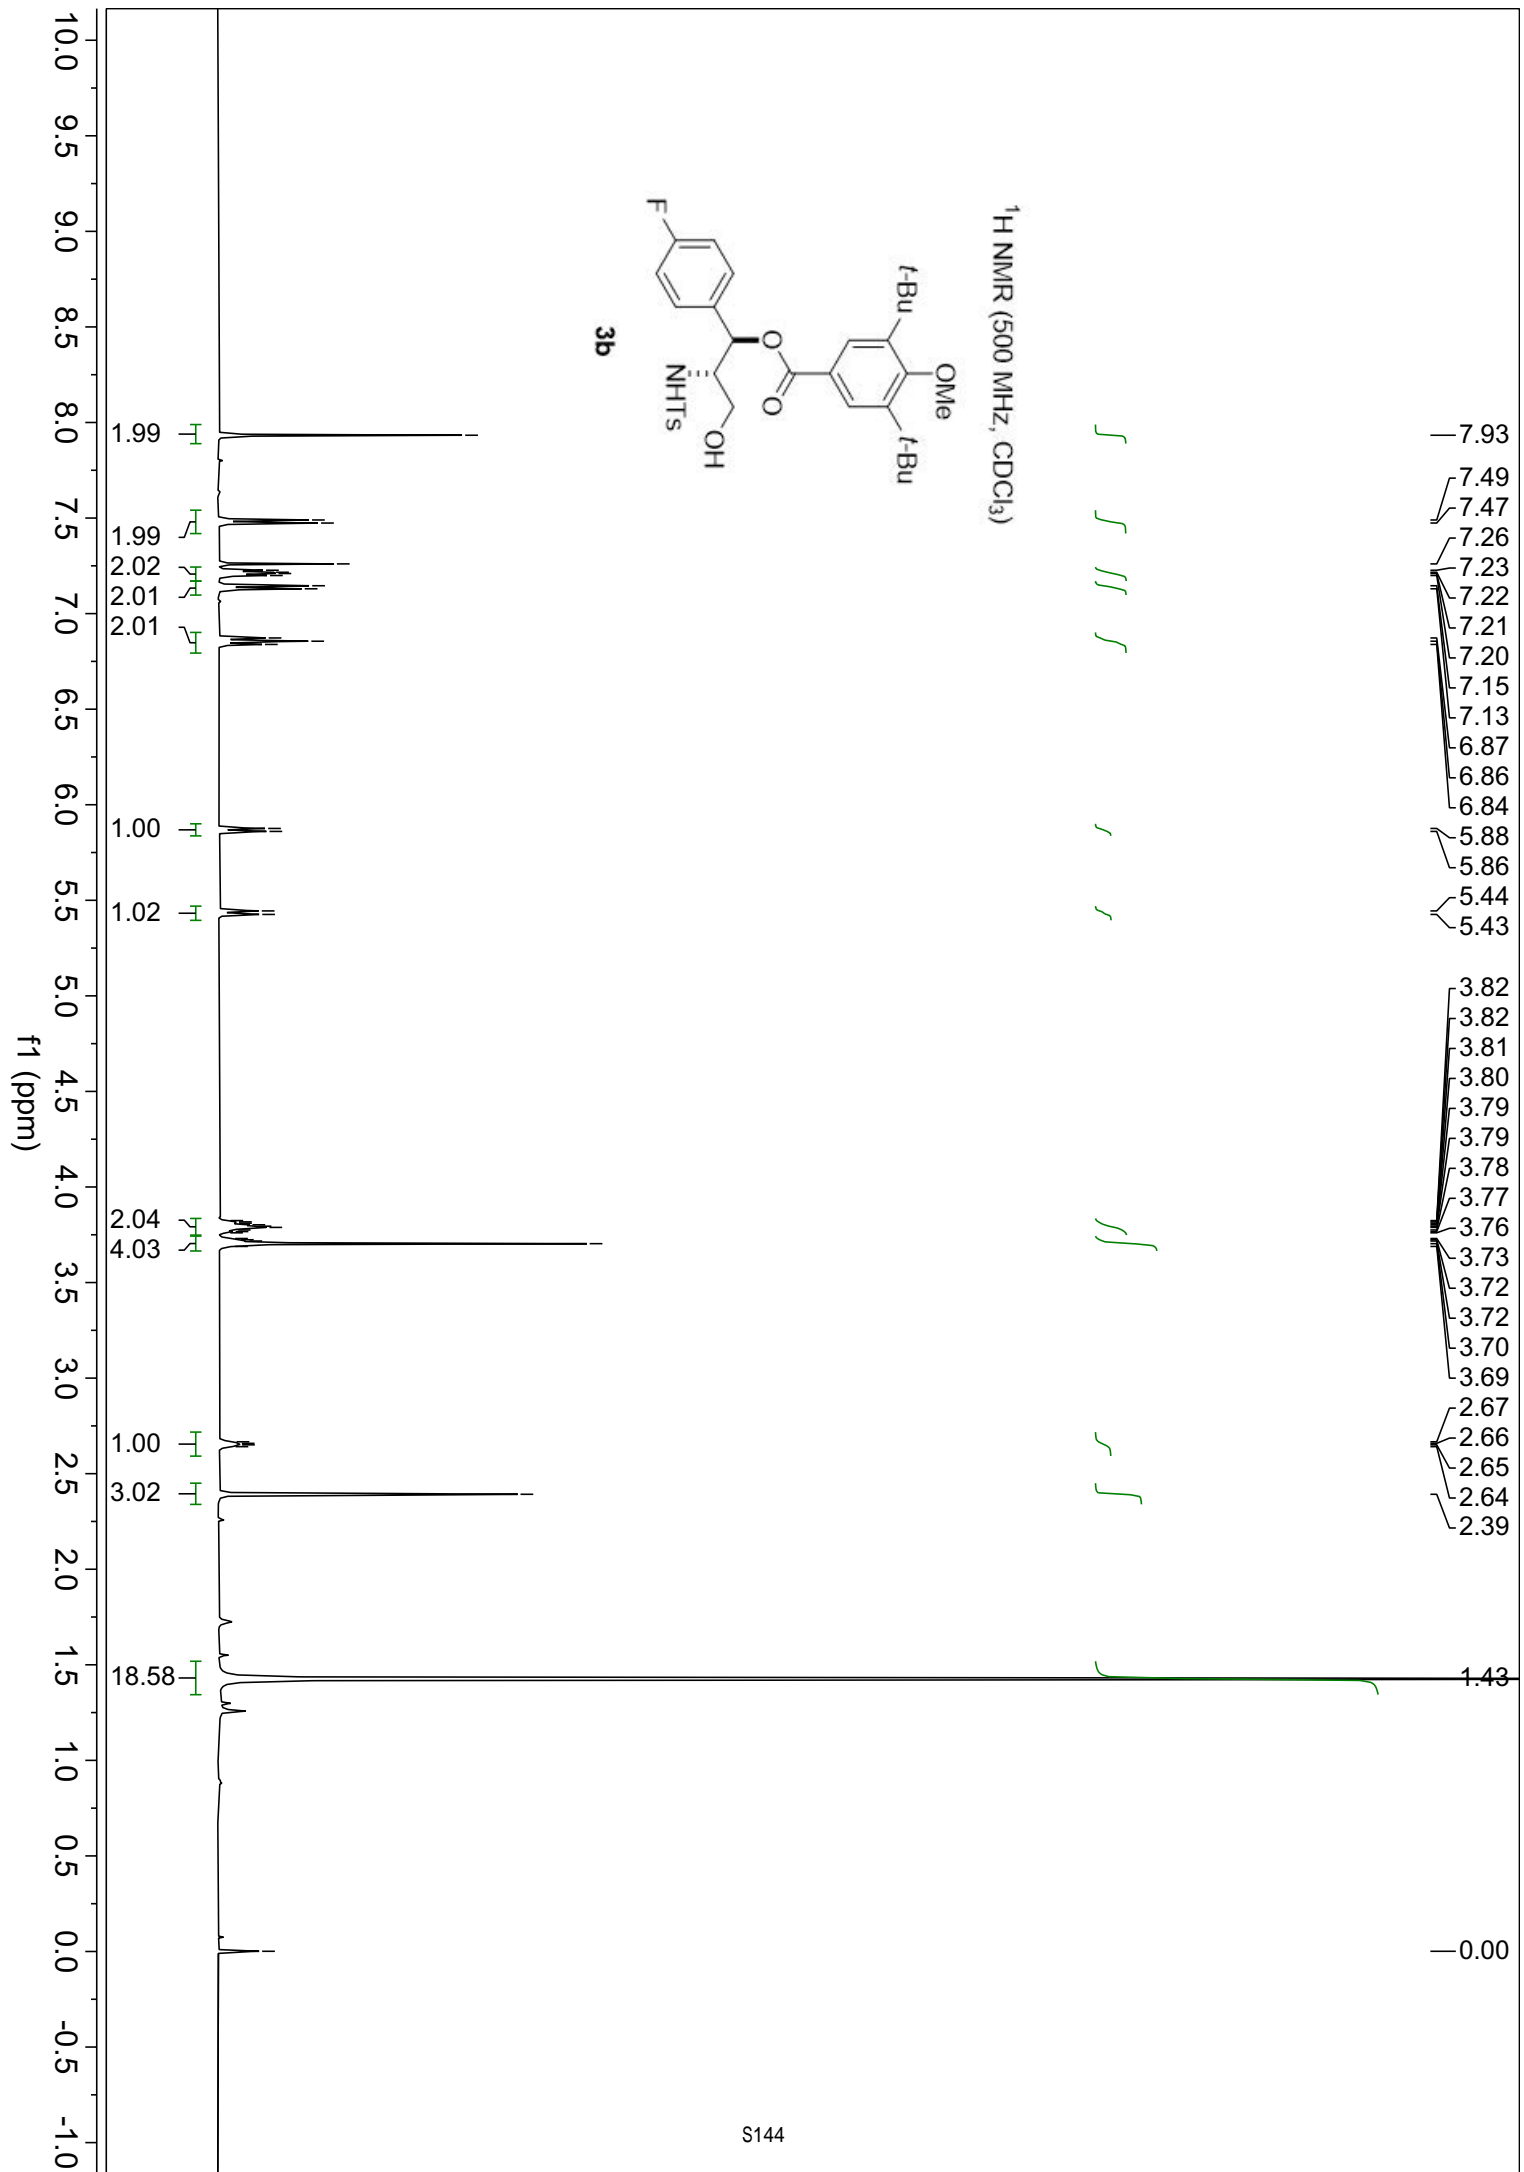



<sup>13</sup>C NMR (126 MHz, CDCl<sub>3</sub>)

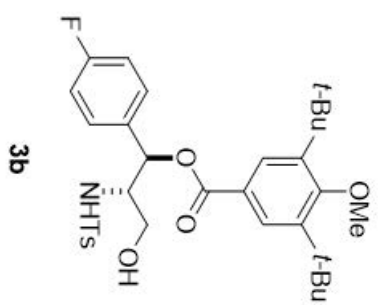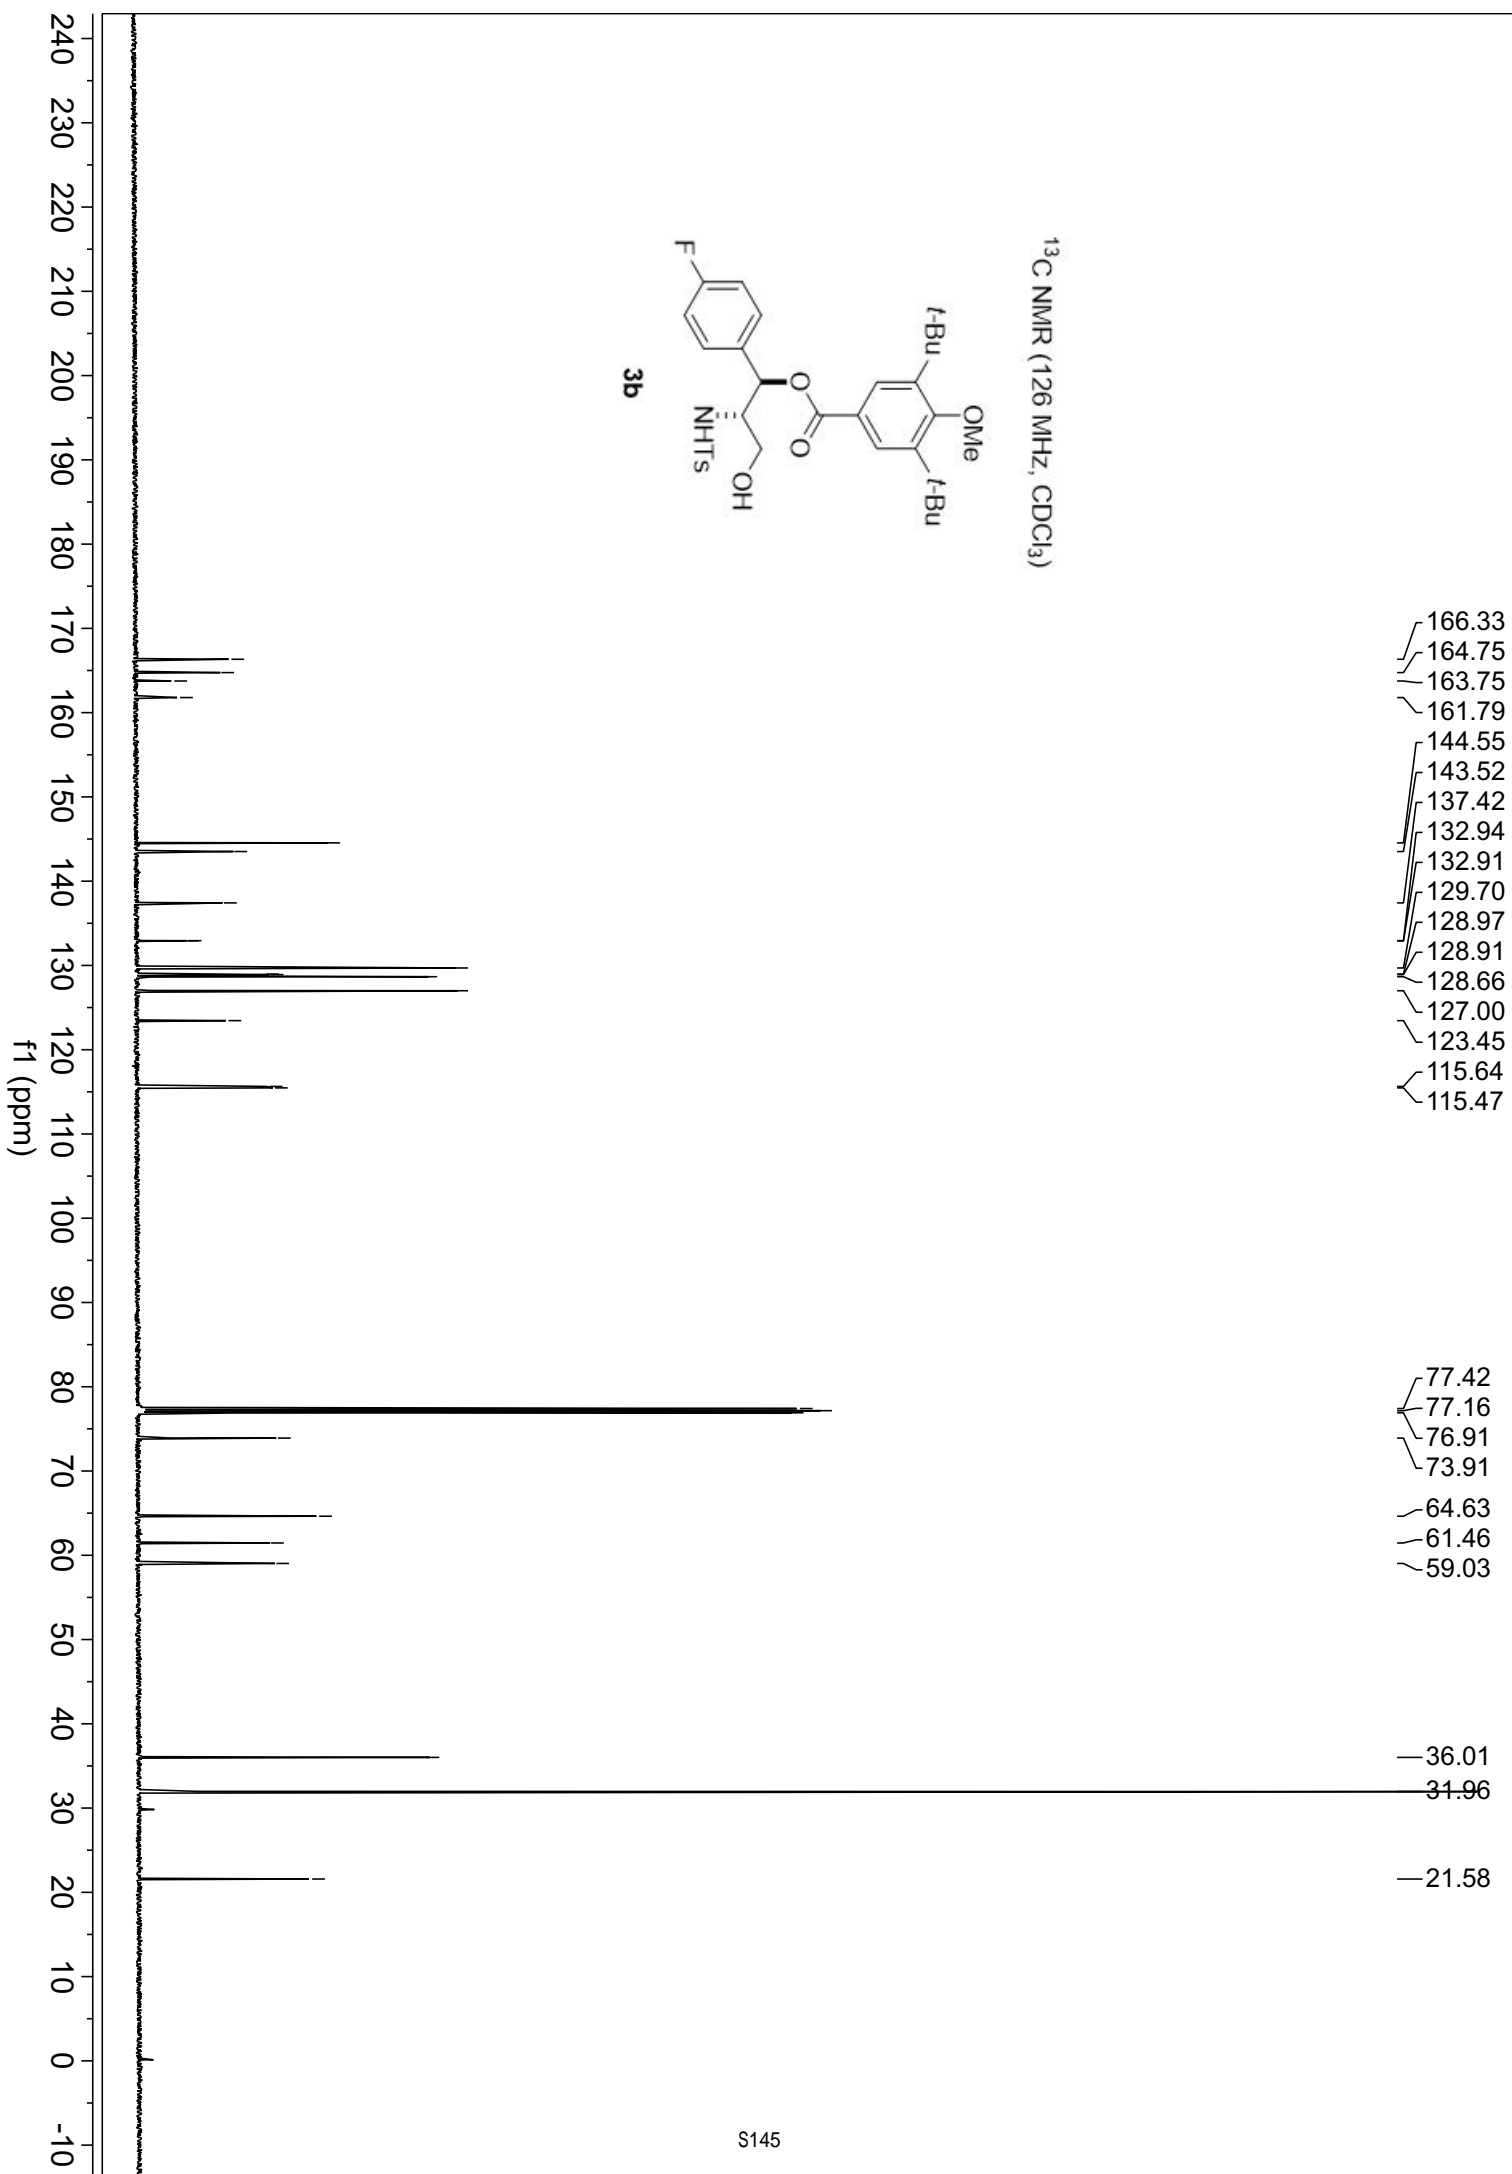

— -113.21

<sup>19</sup>F NMR (471 MHz, CDCl<sub>3</sub>)

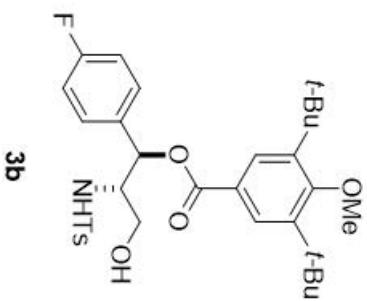

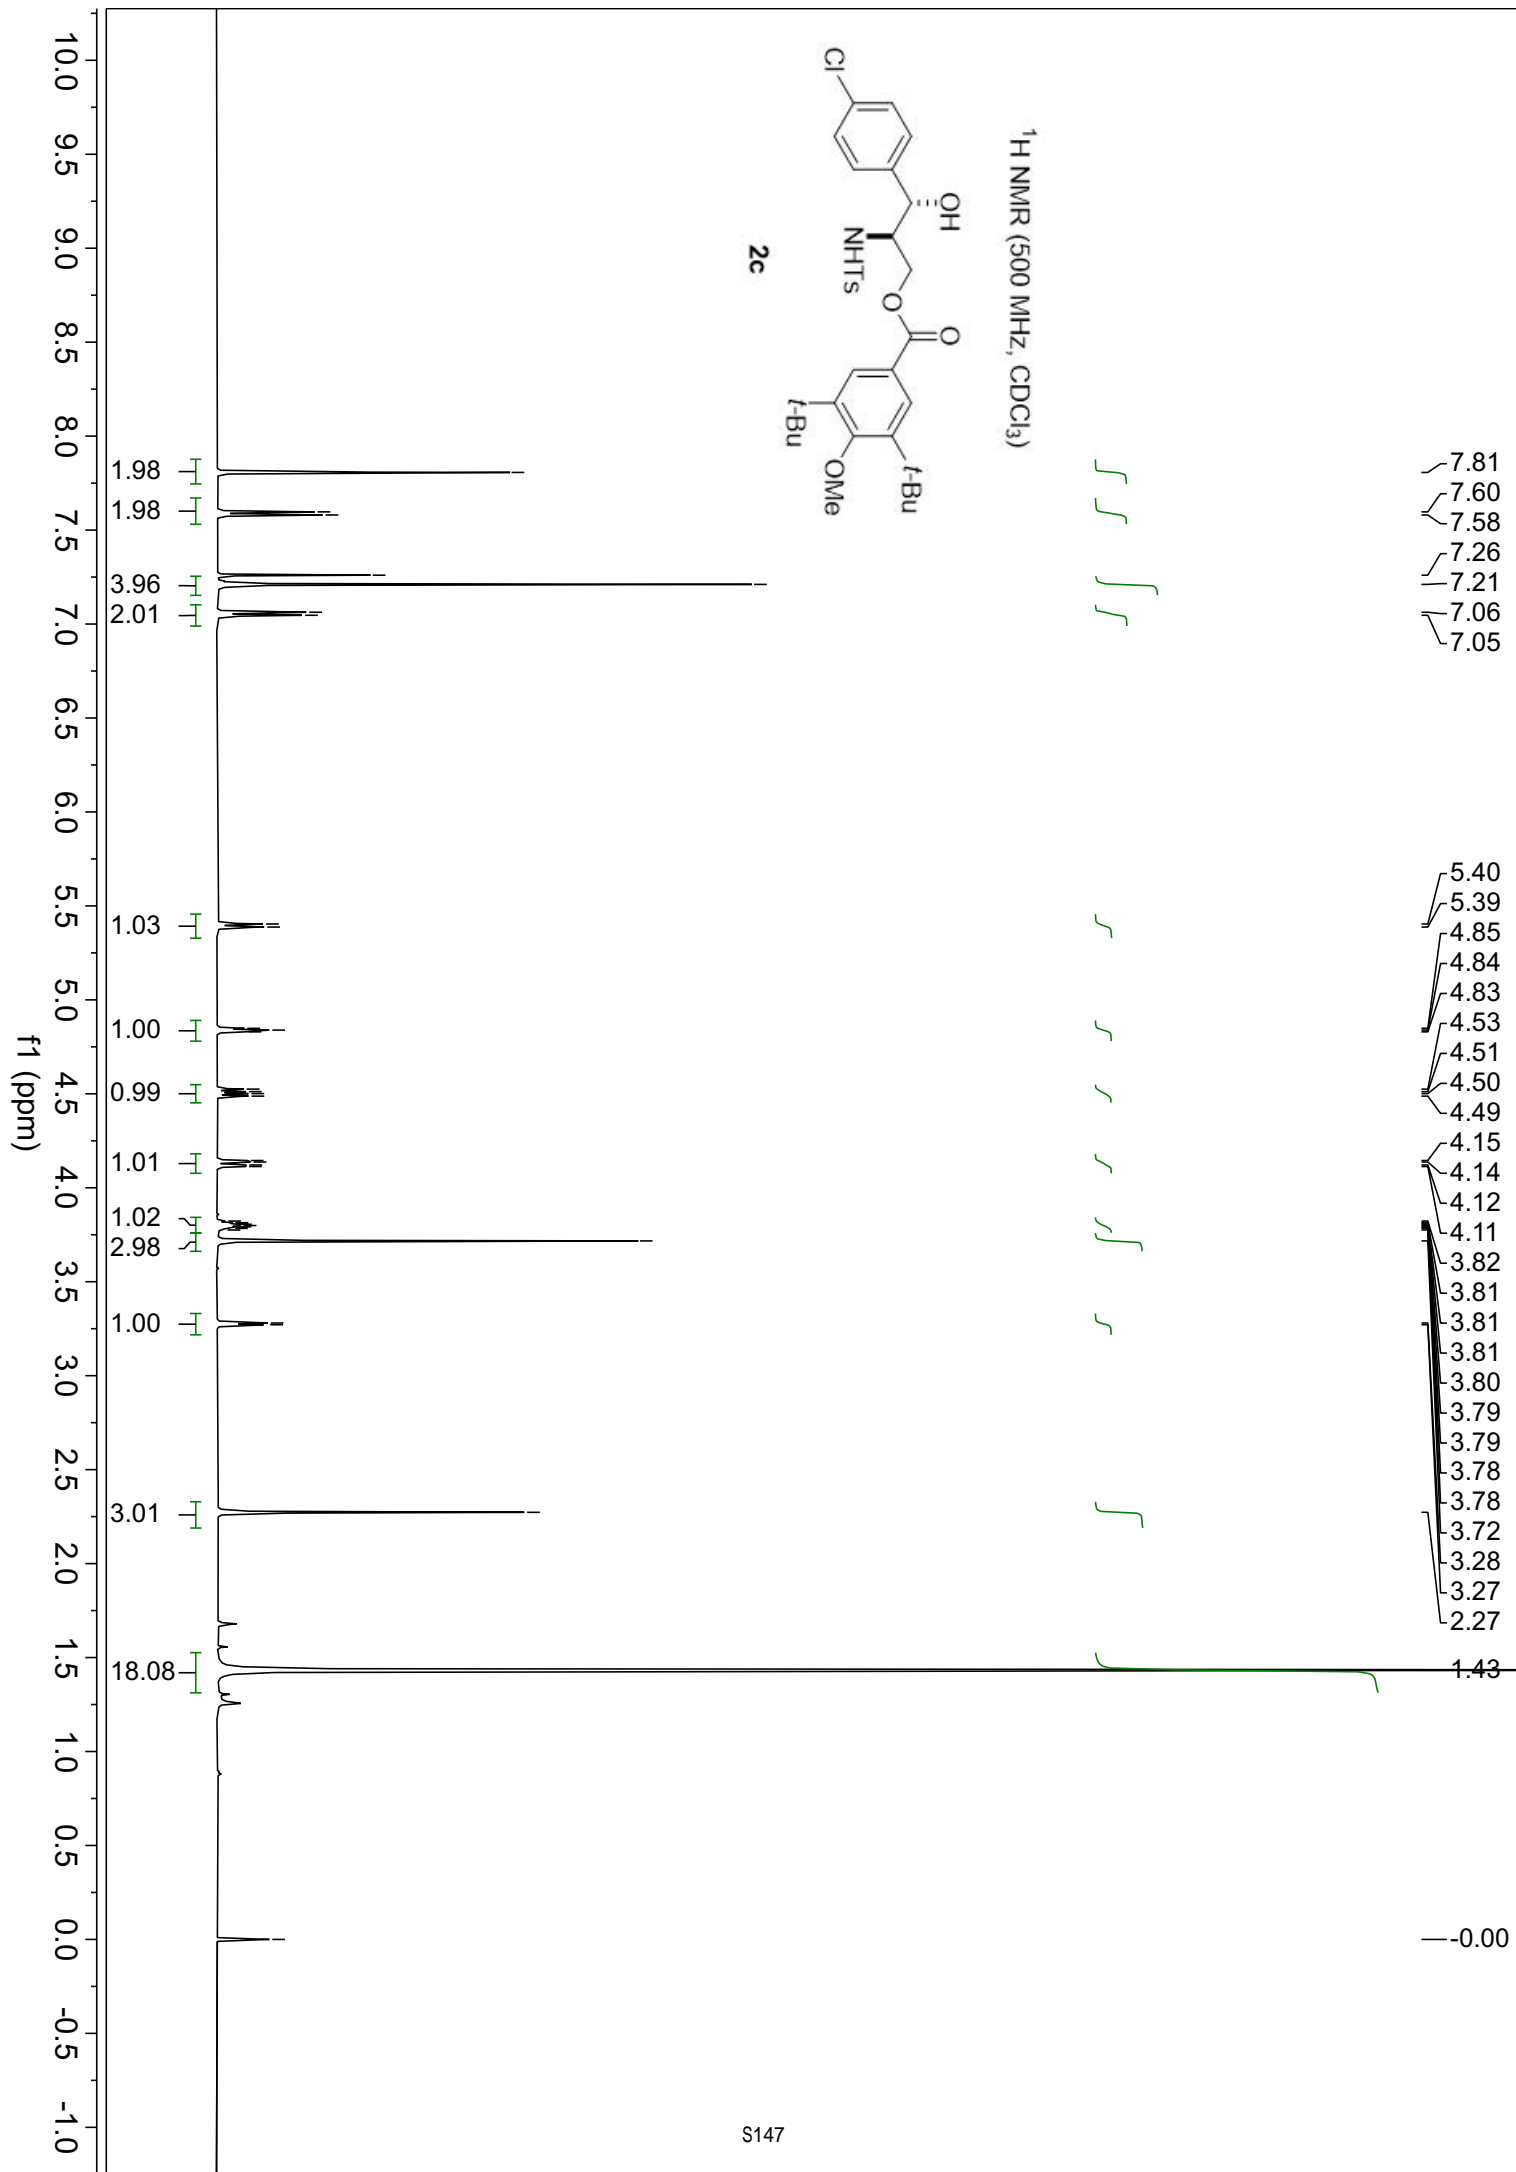

<sup>13</sup>C NMR (126 MHz, CDCl<sub>3</sub>)

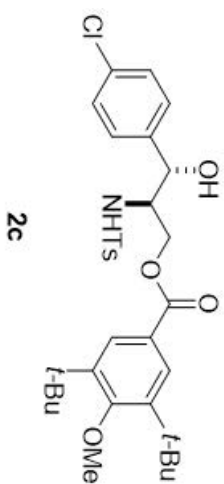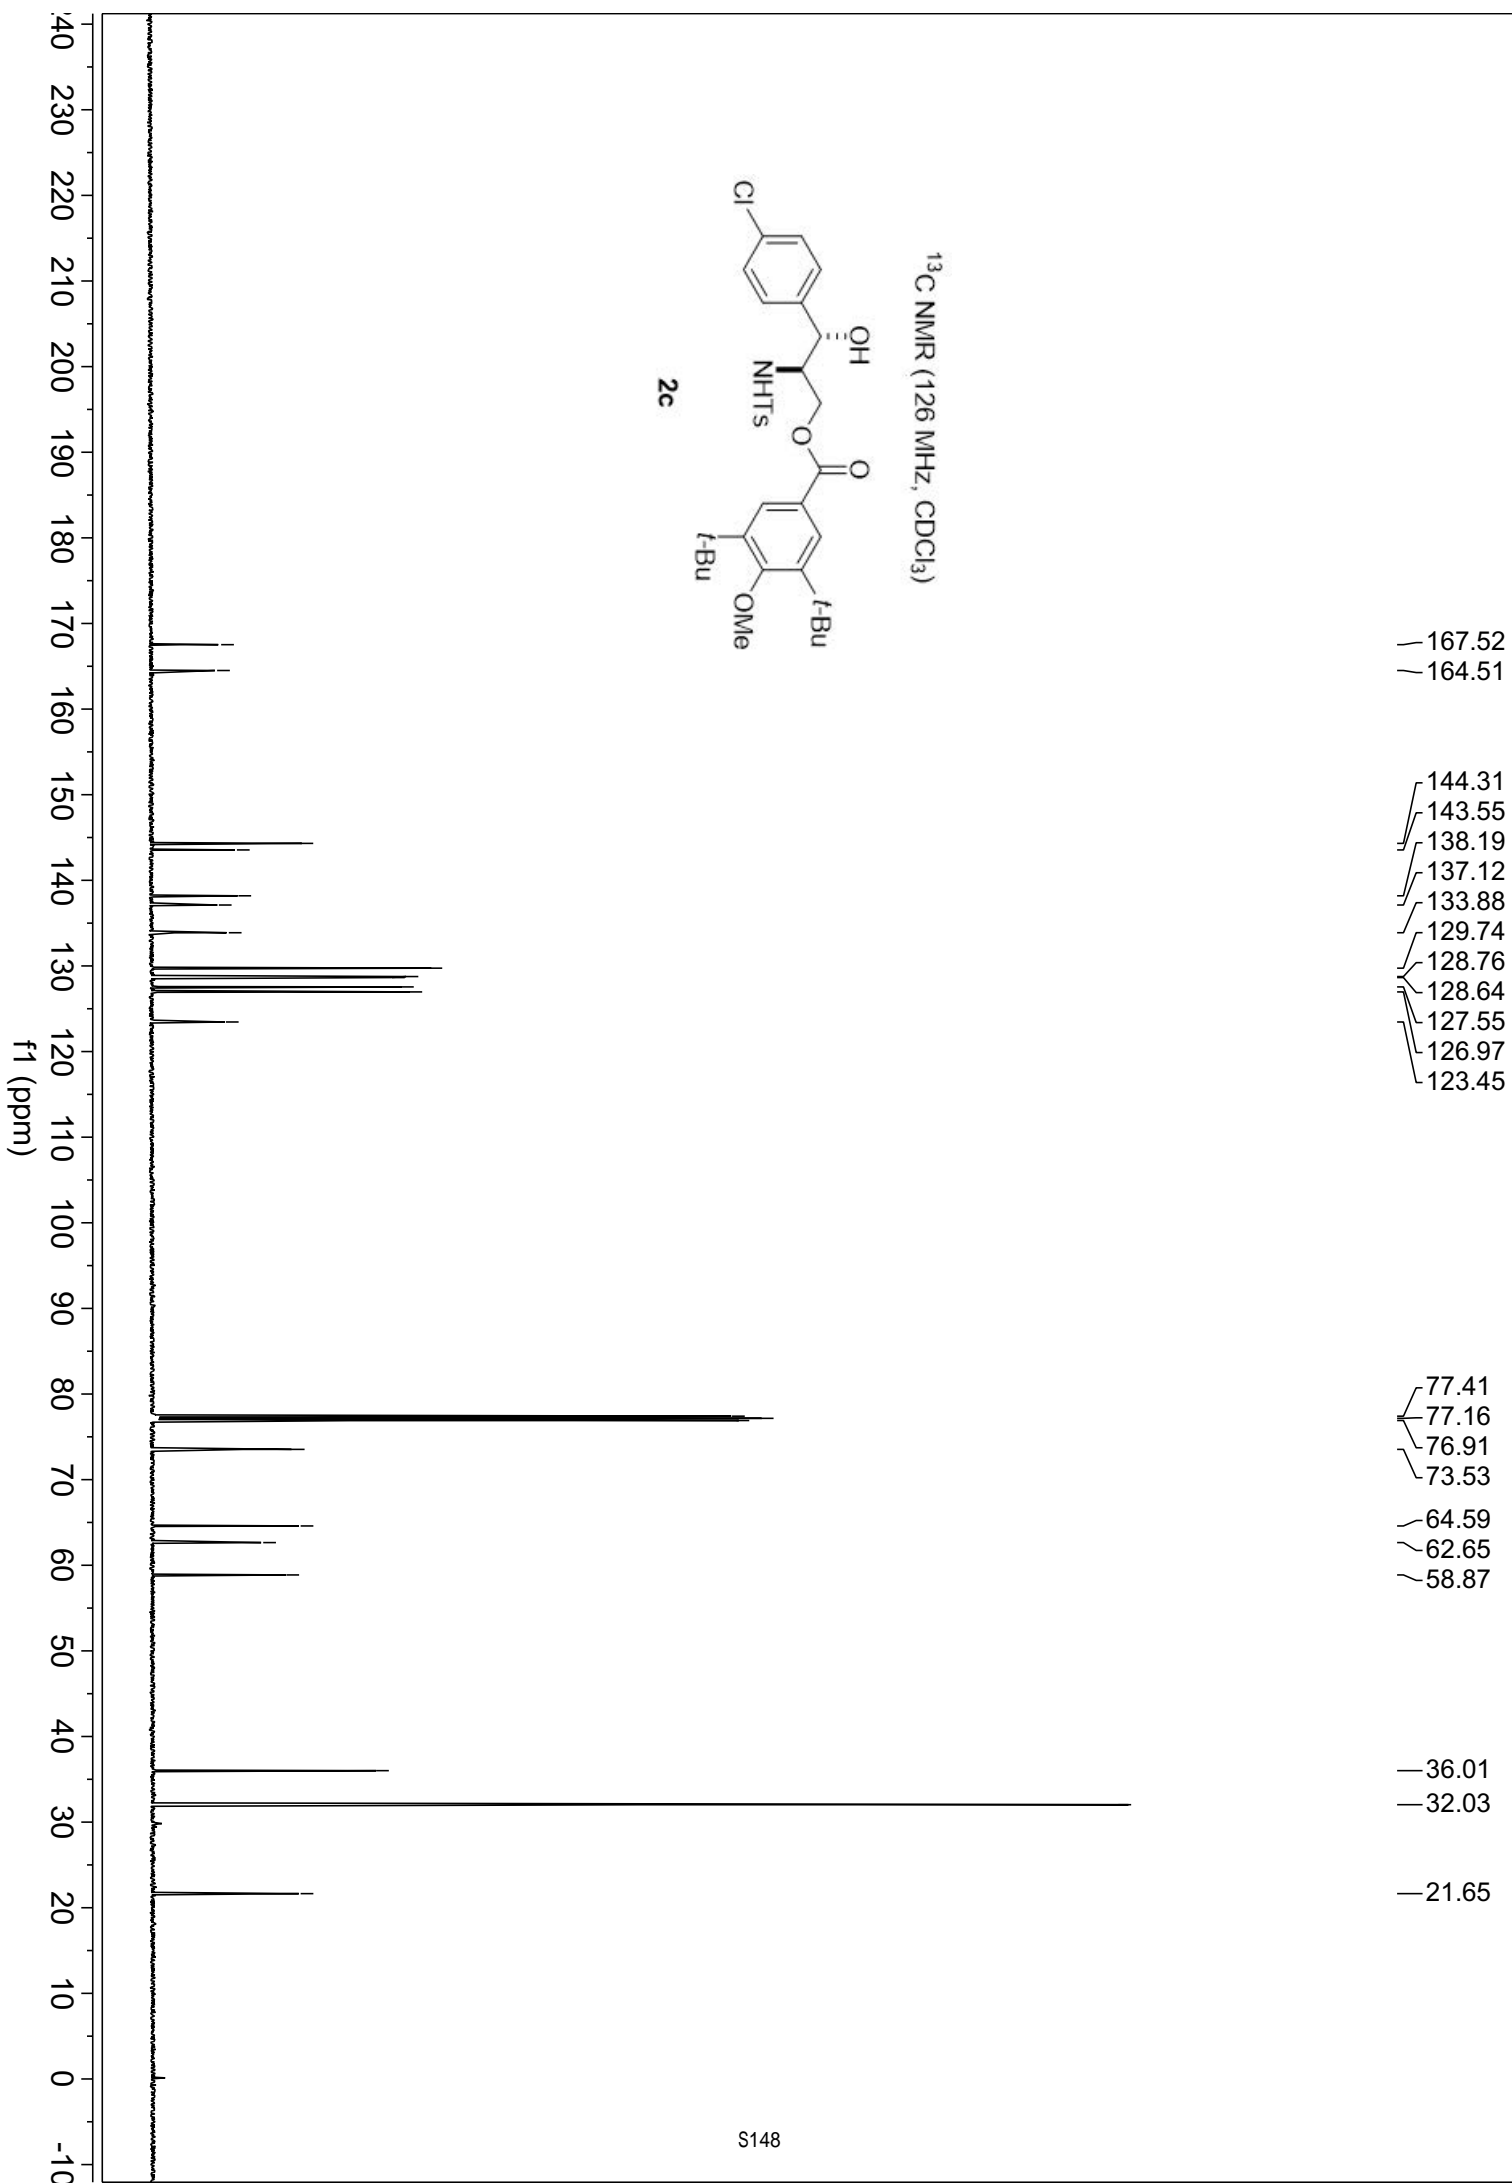

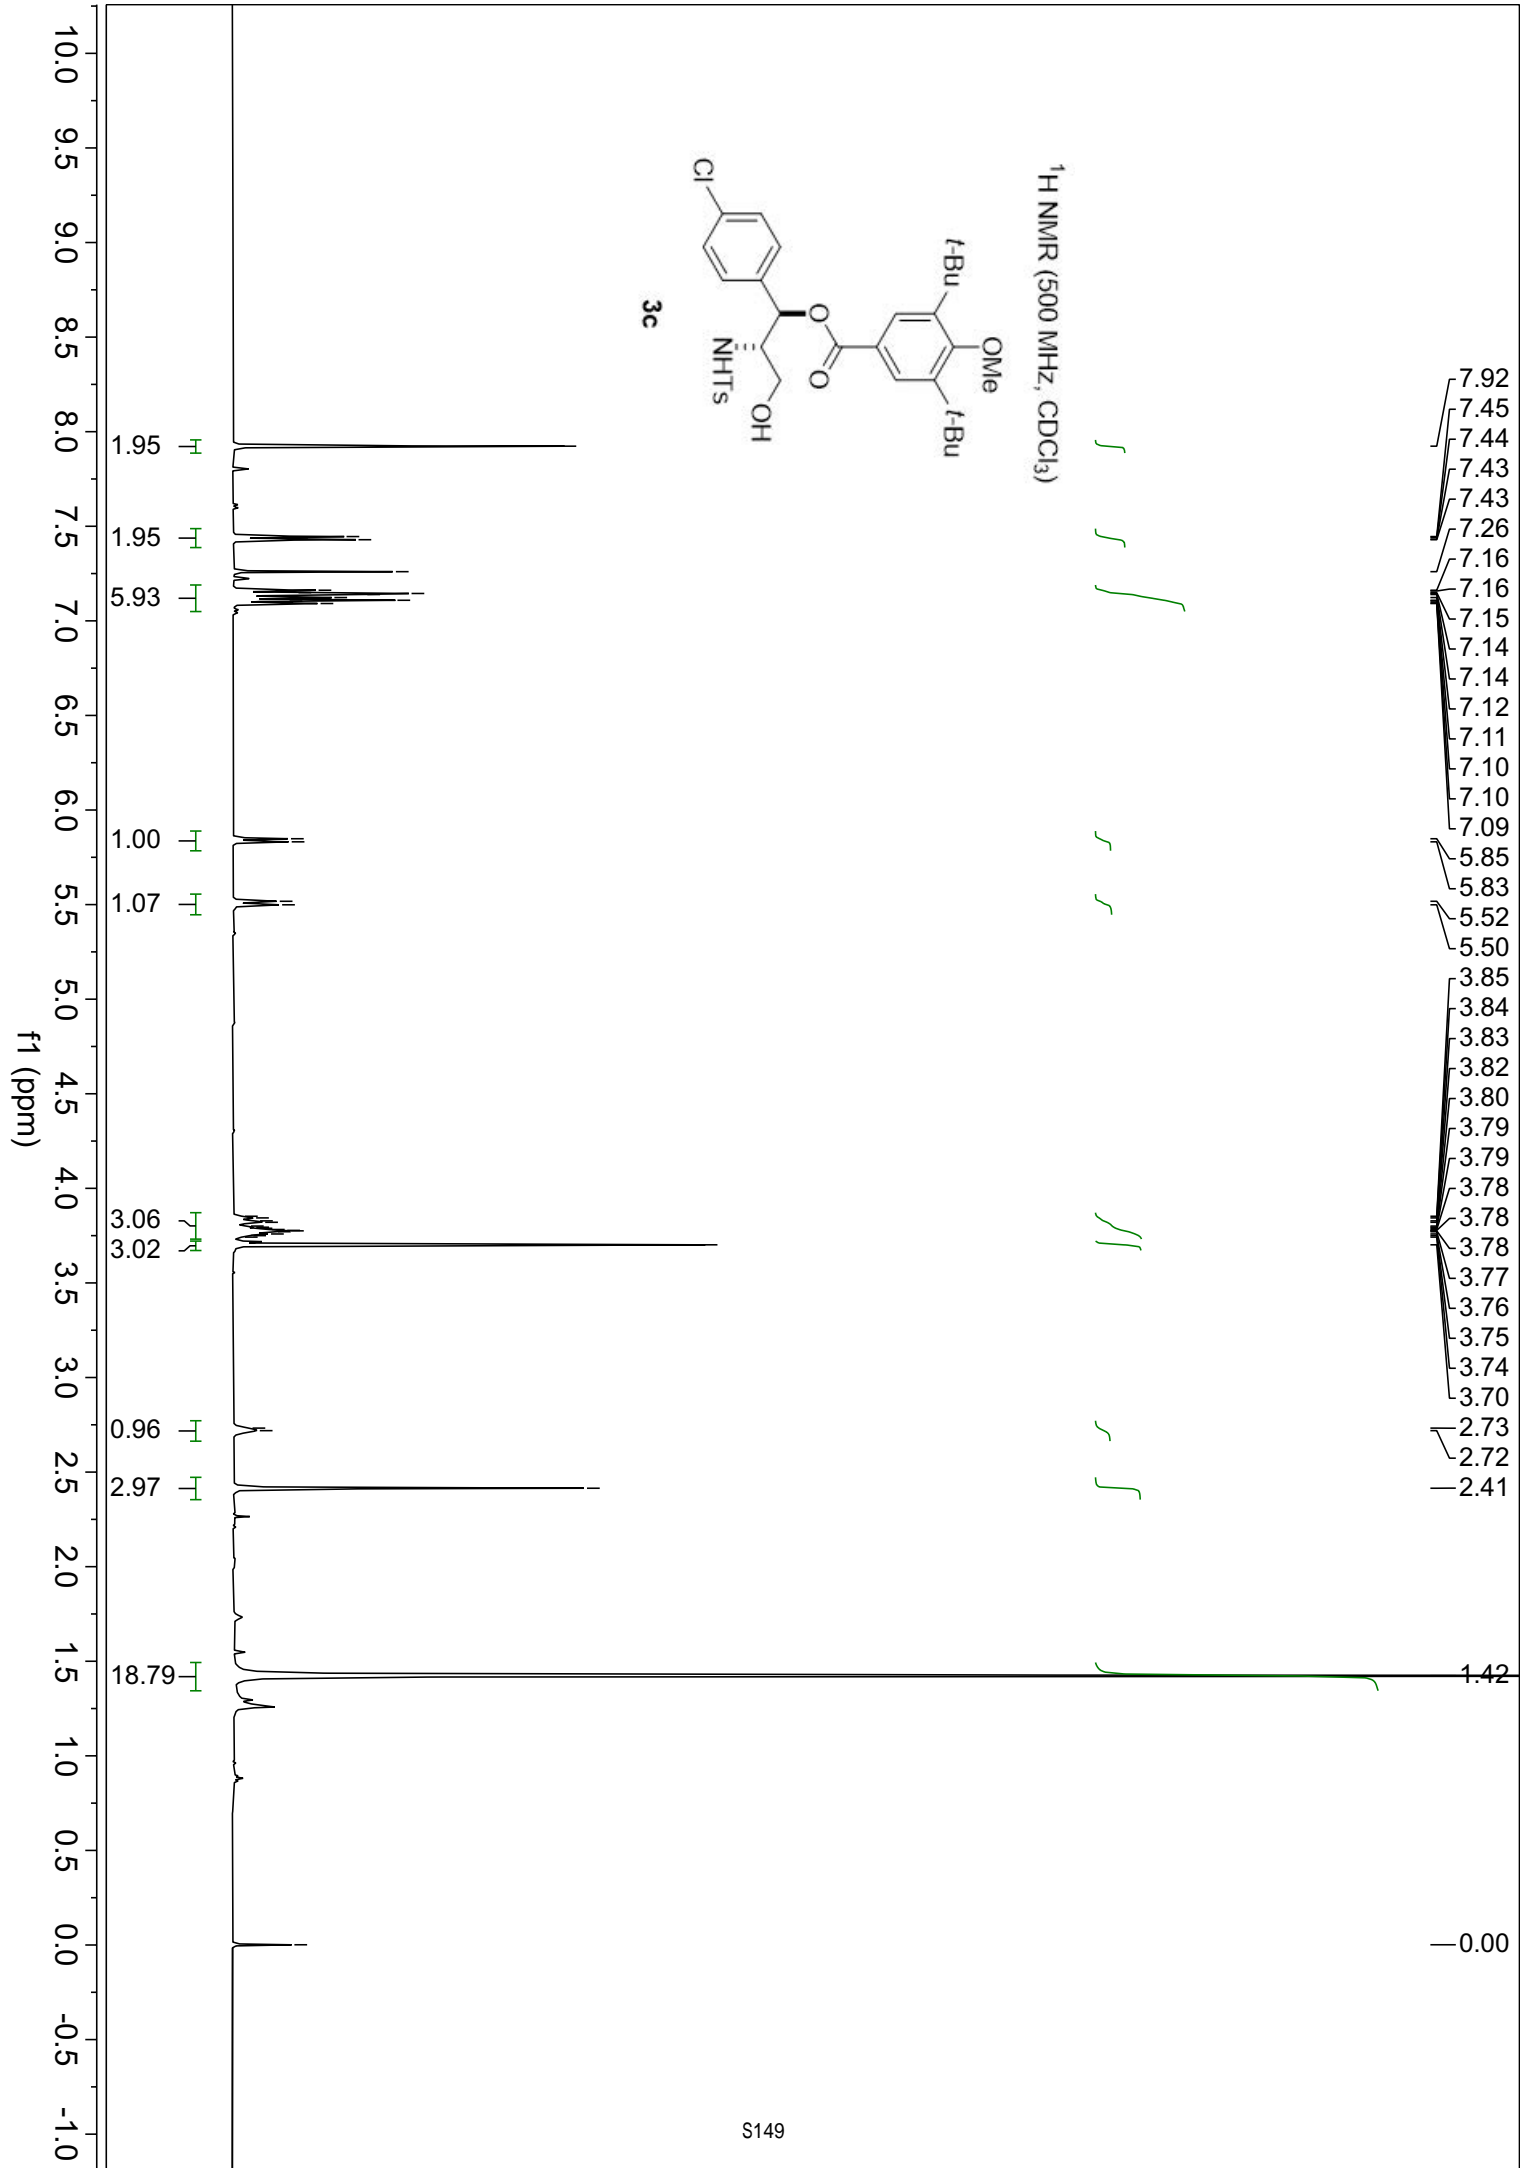

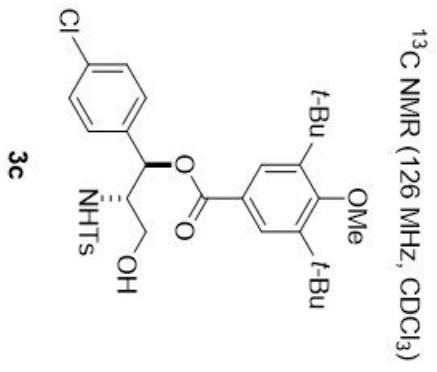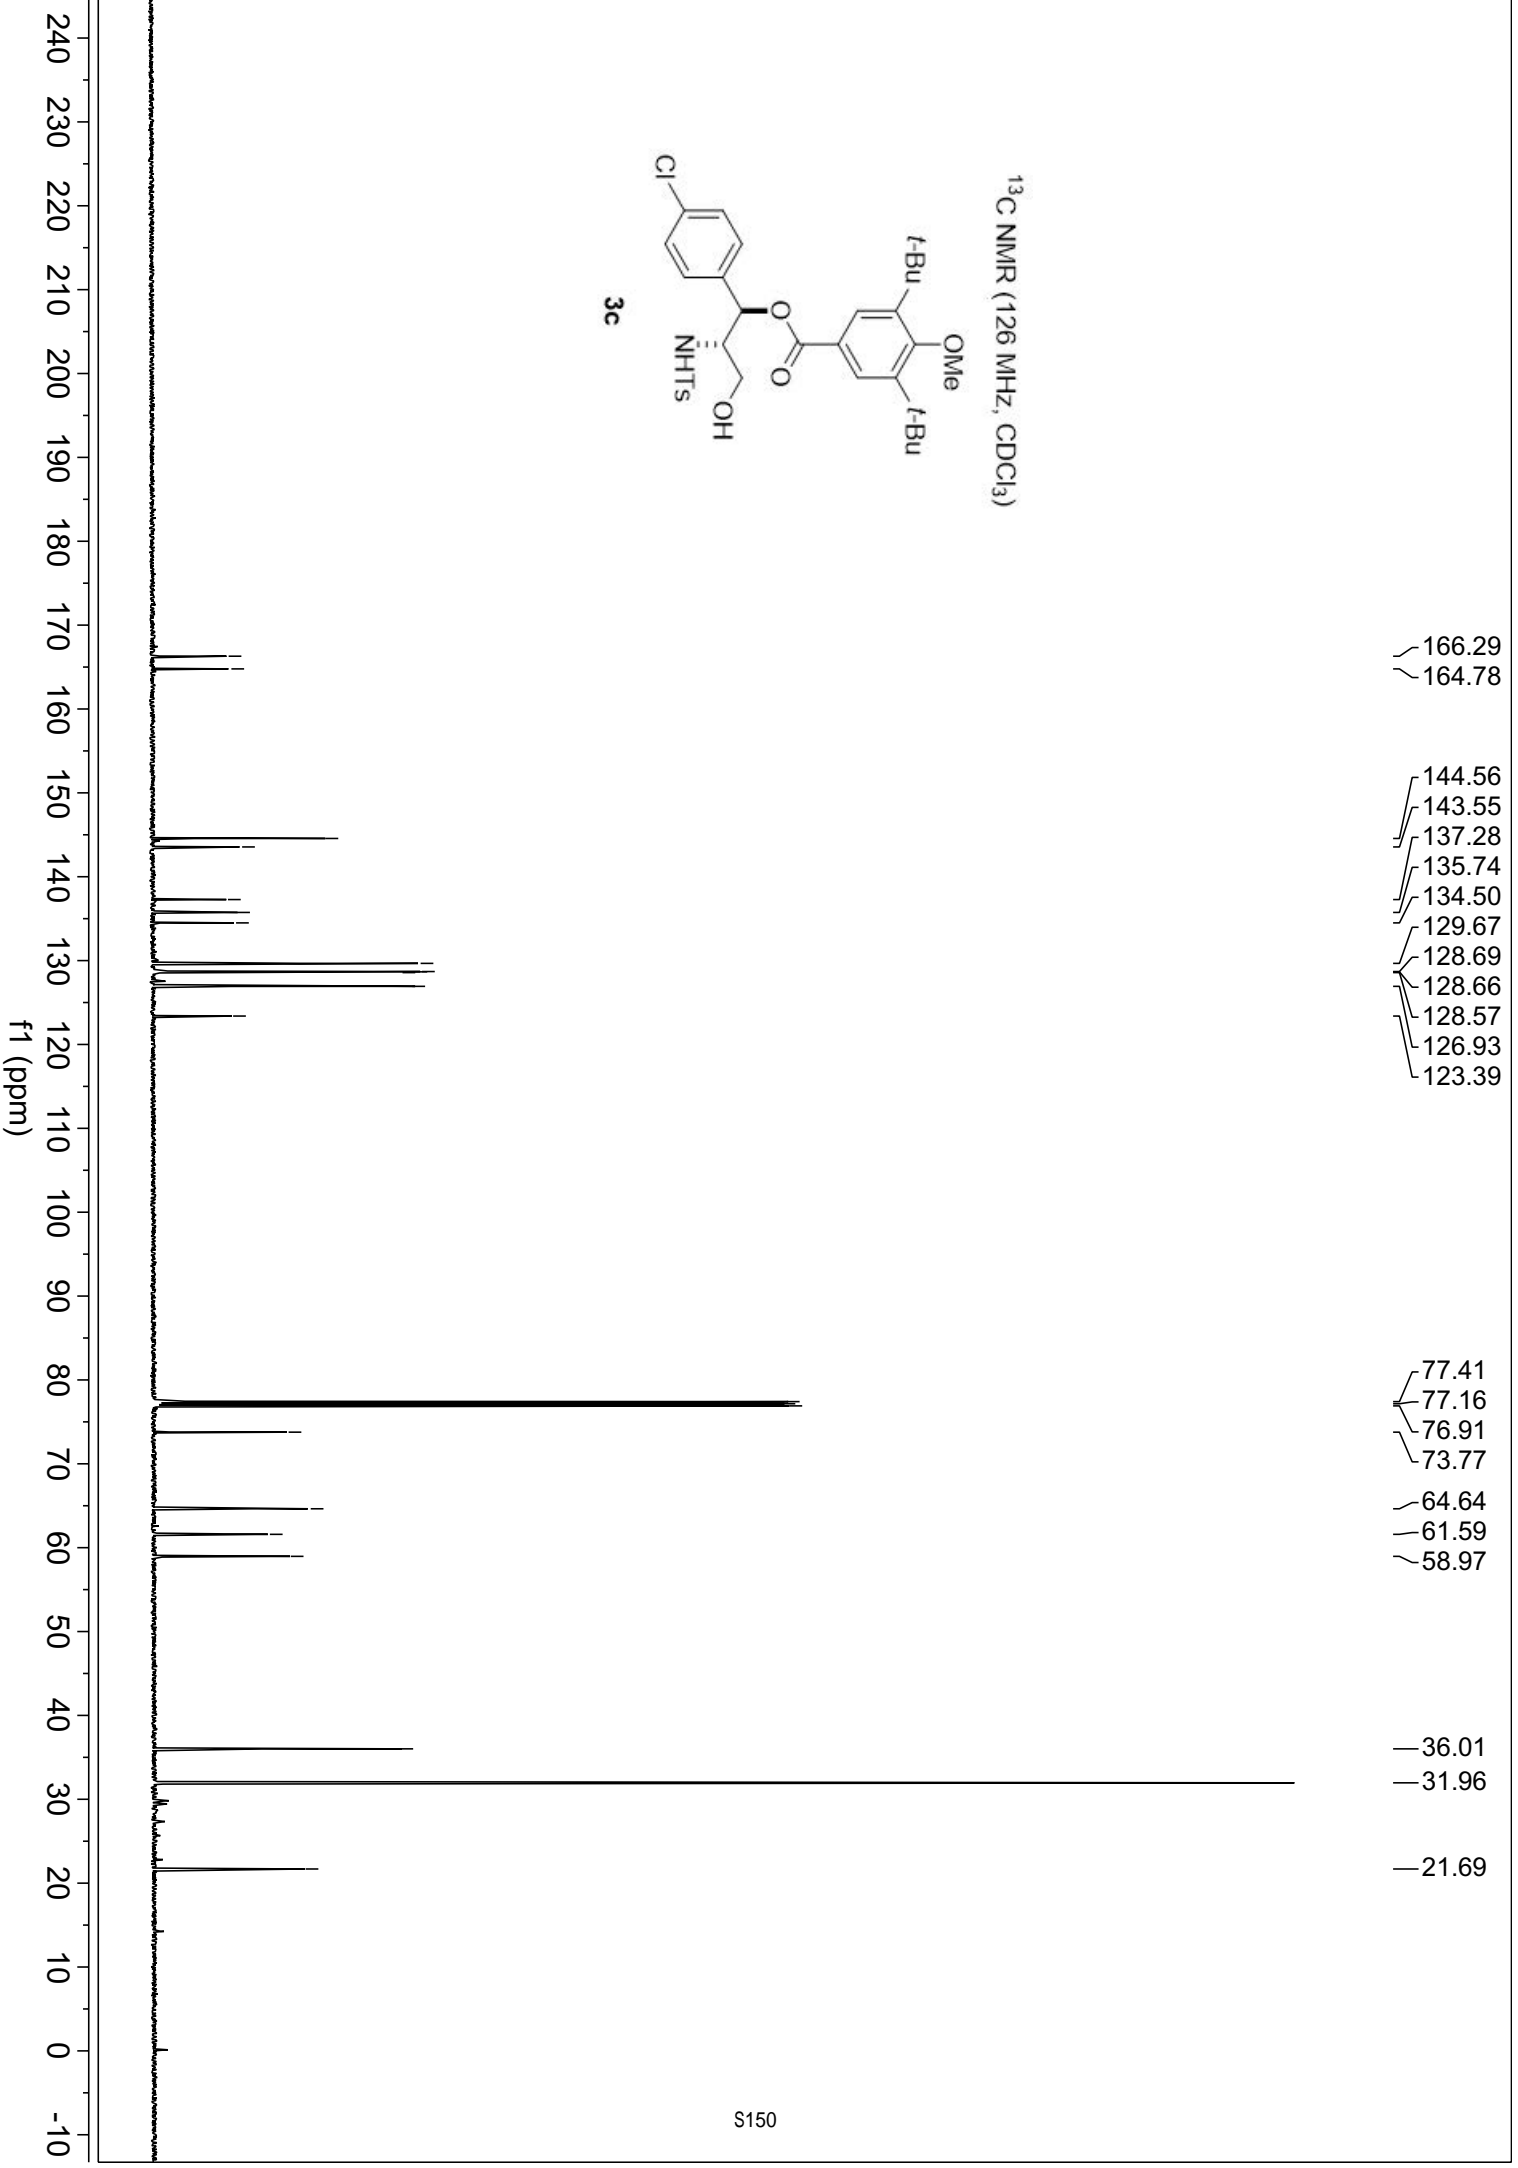

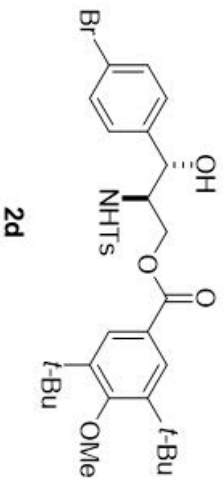

<sup>1</sup>H NMR (500 MHz, CDCl<sub>3</sub>)

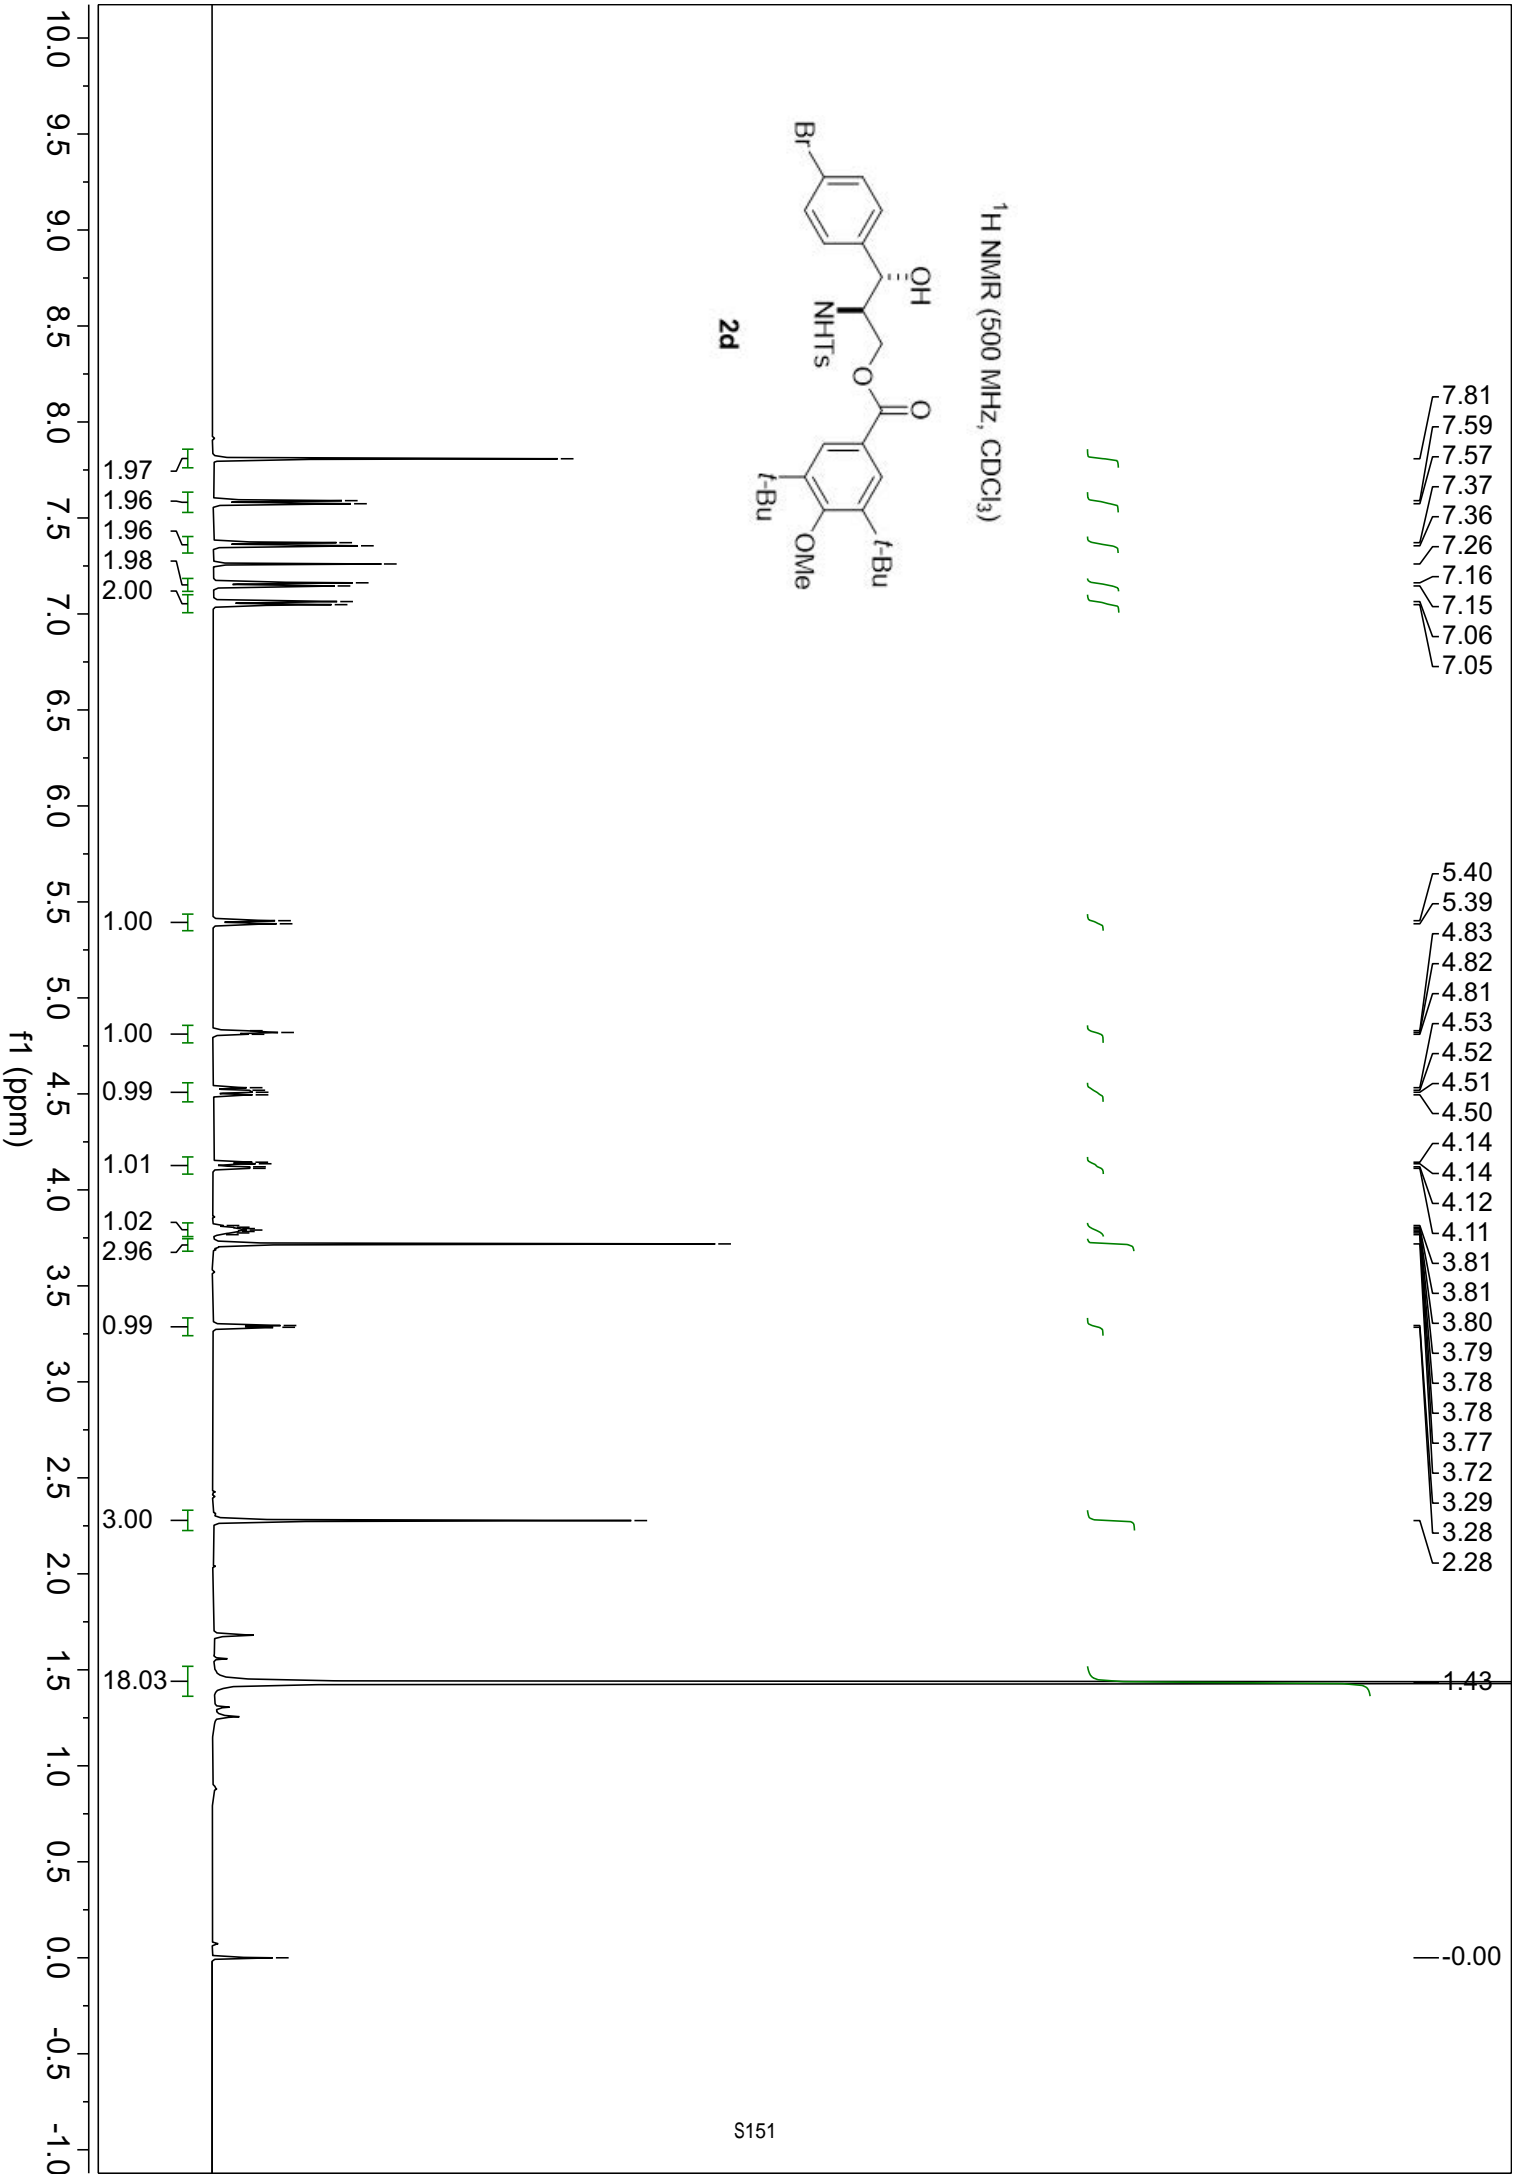

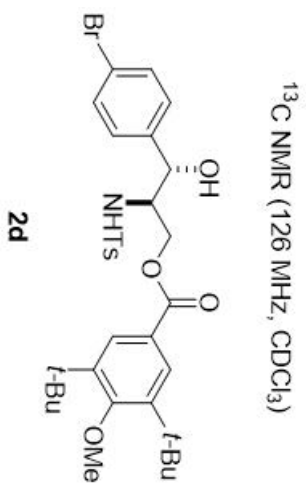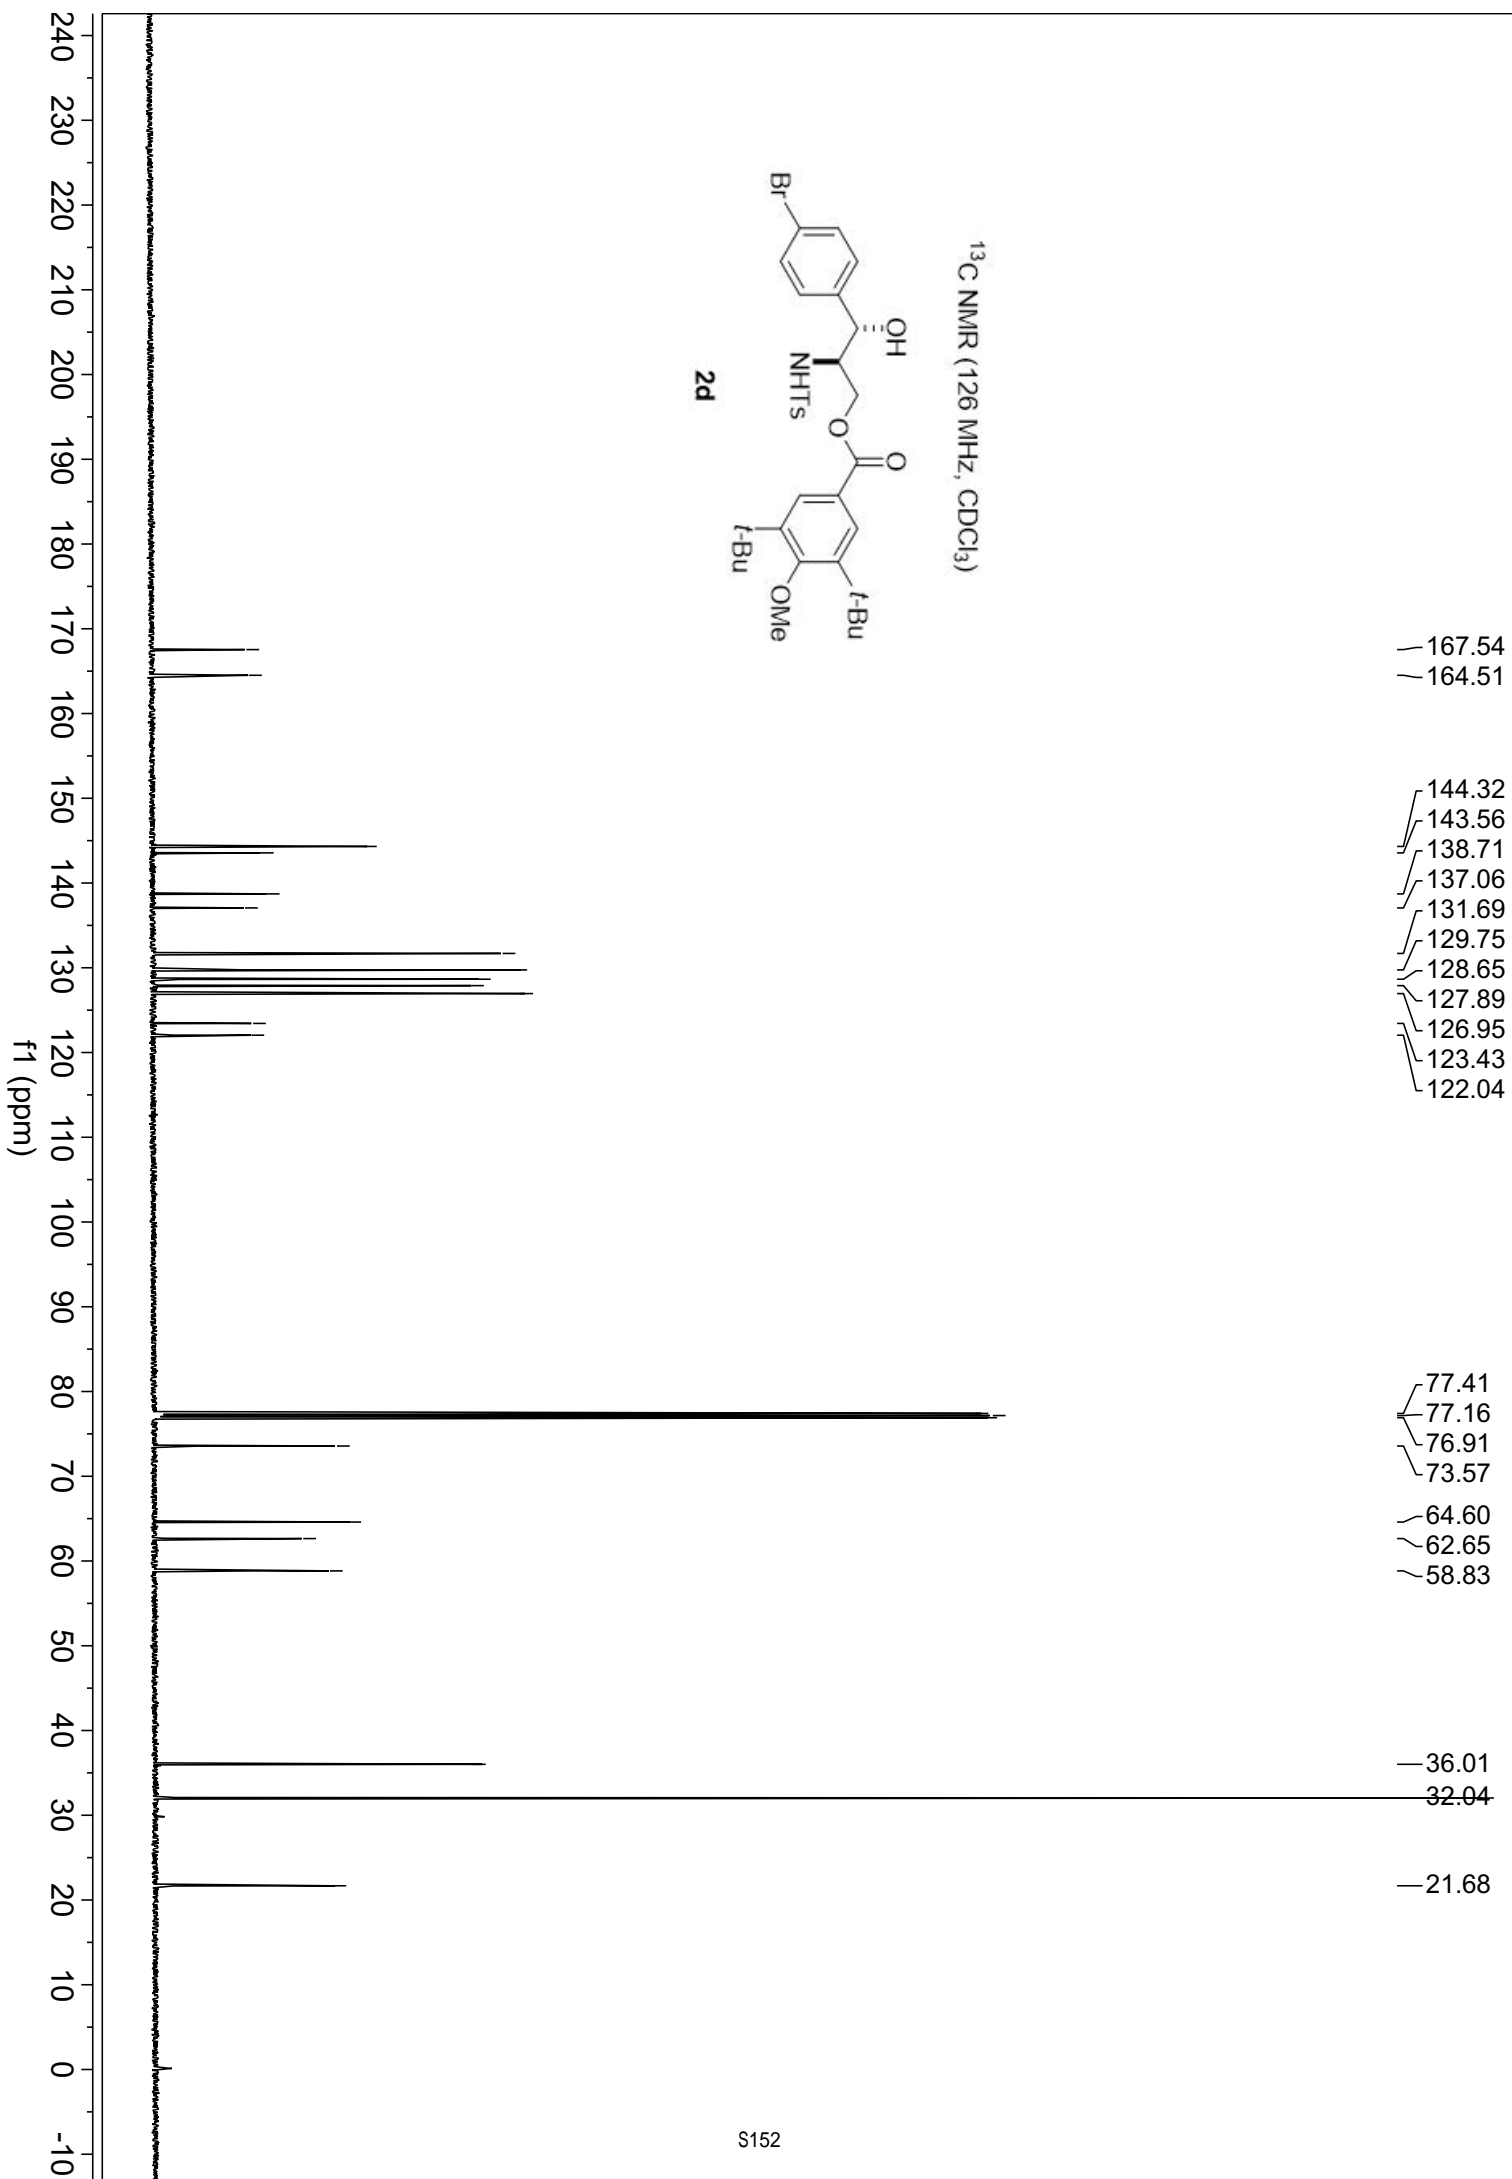



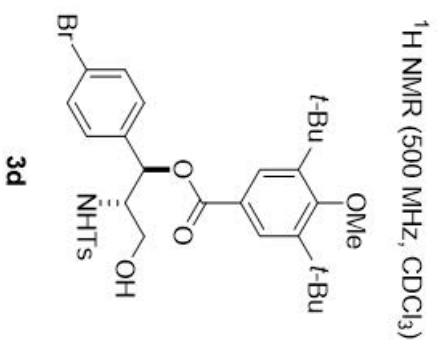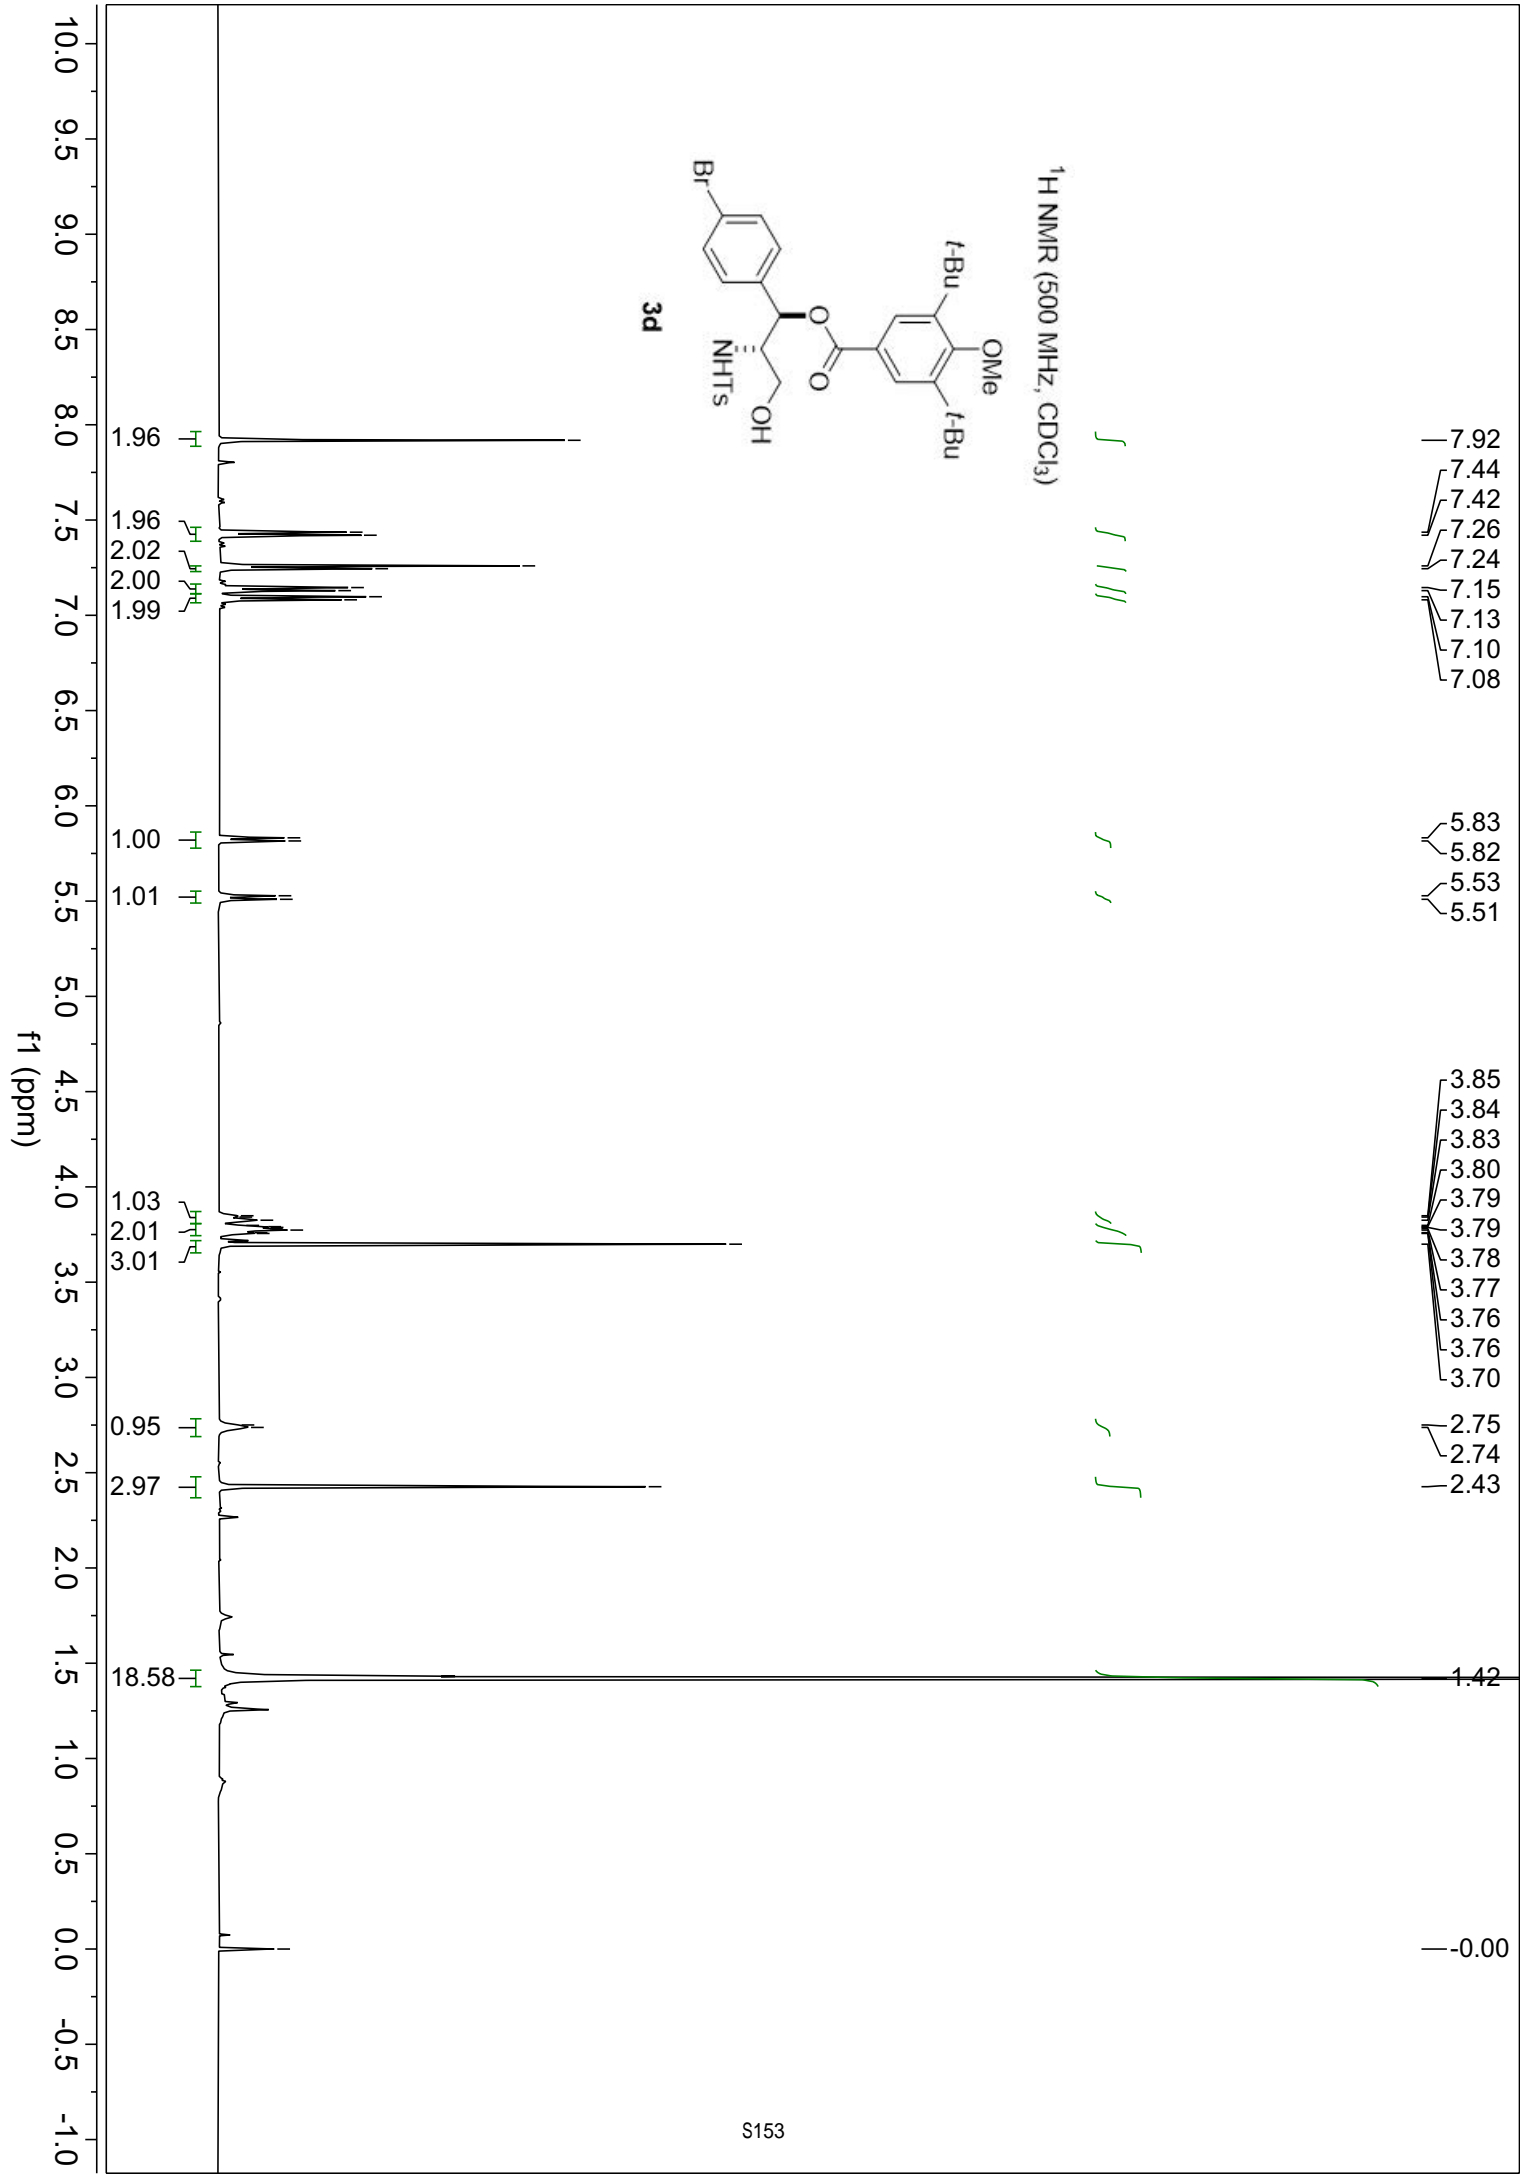

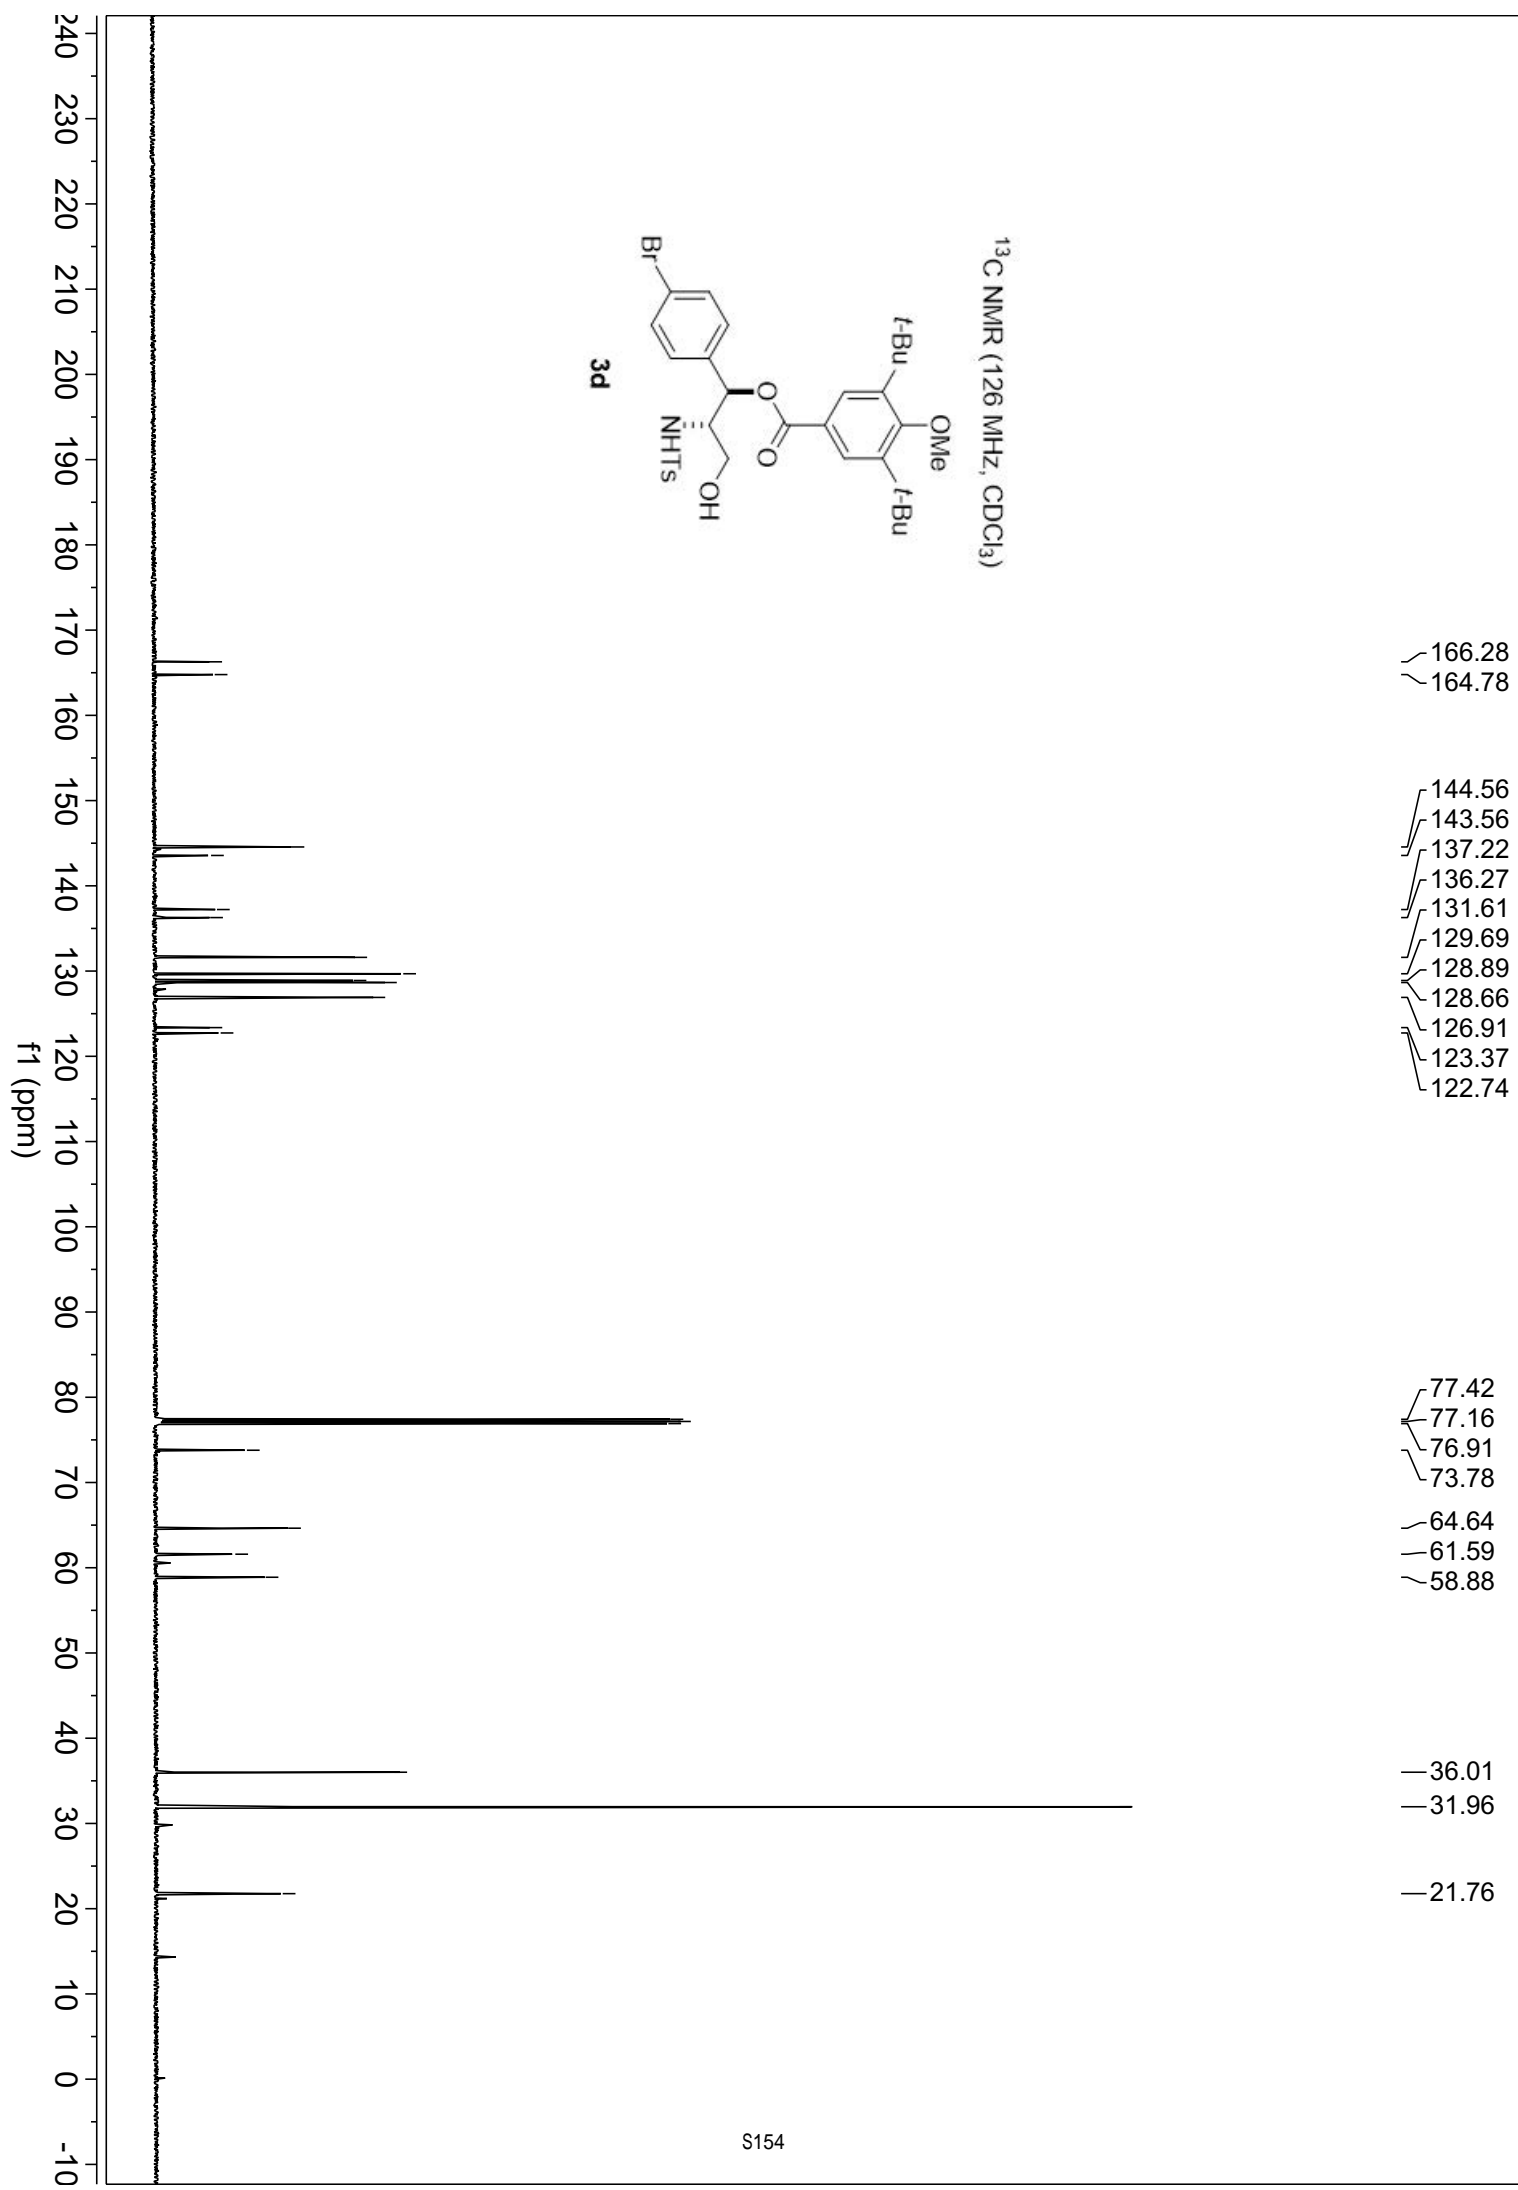

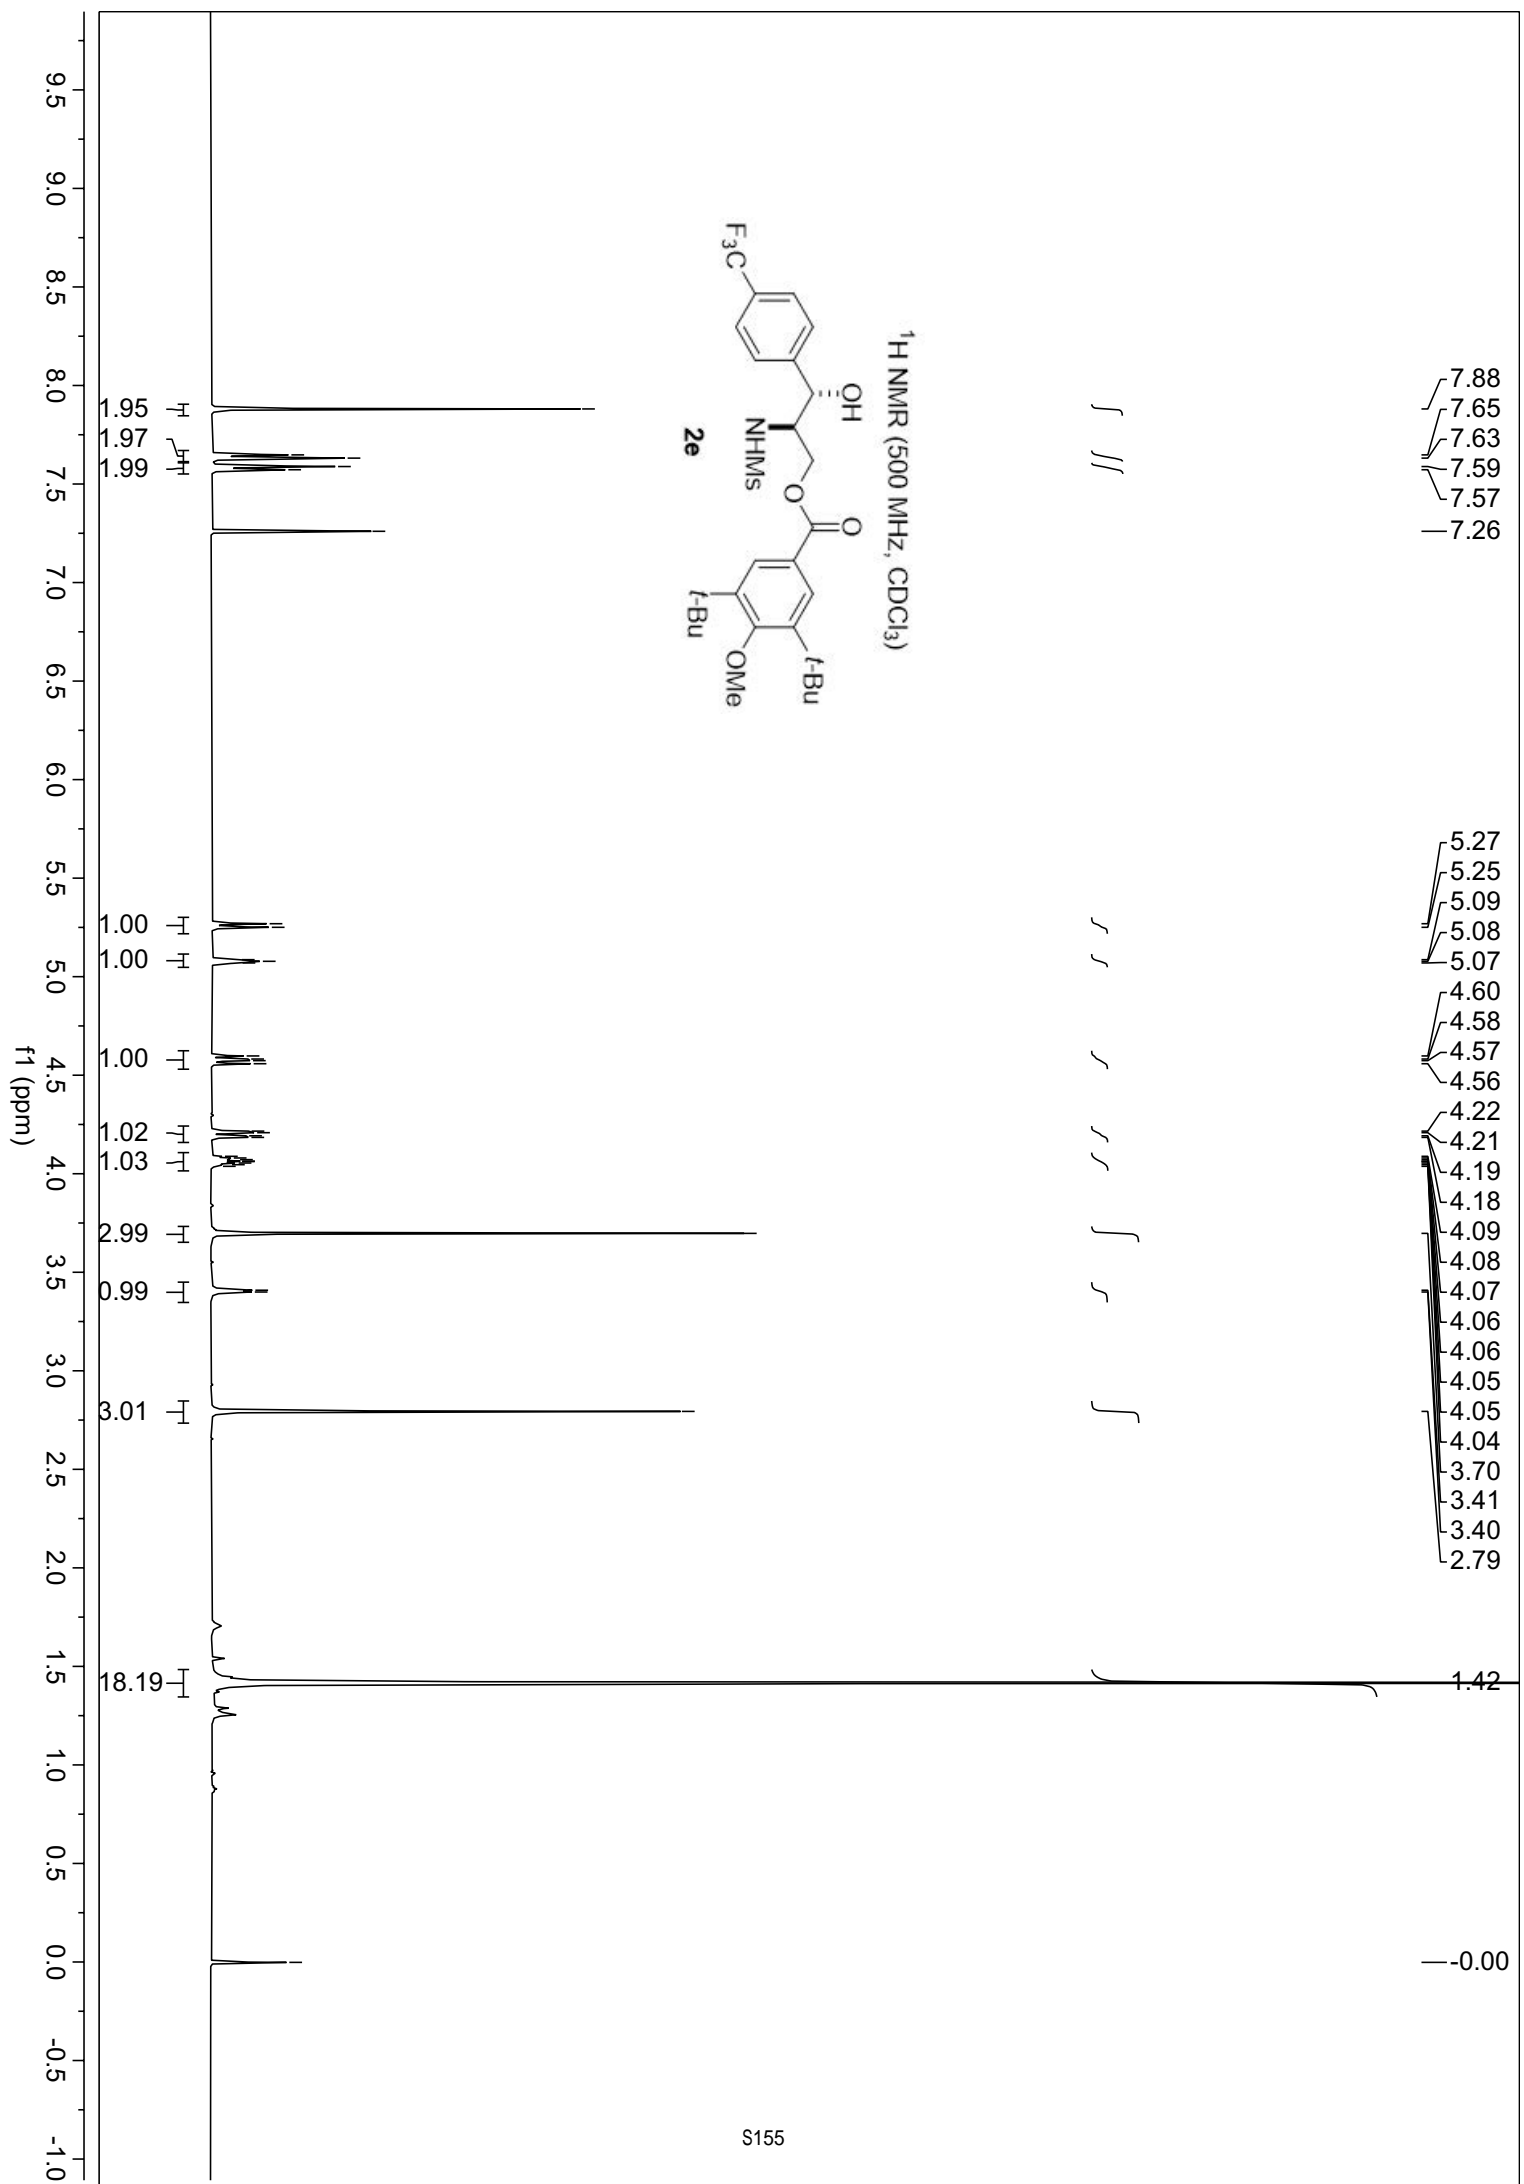

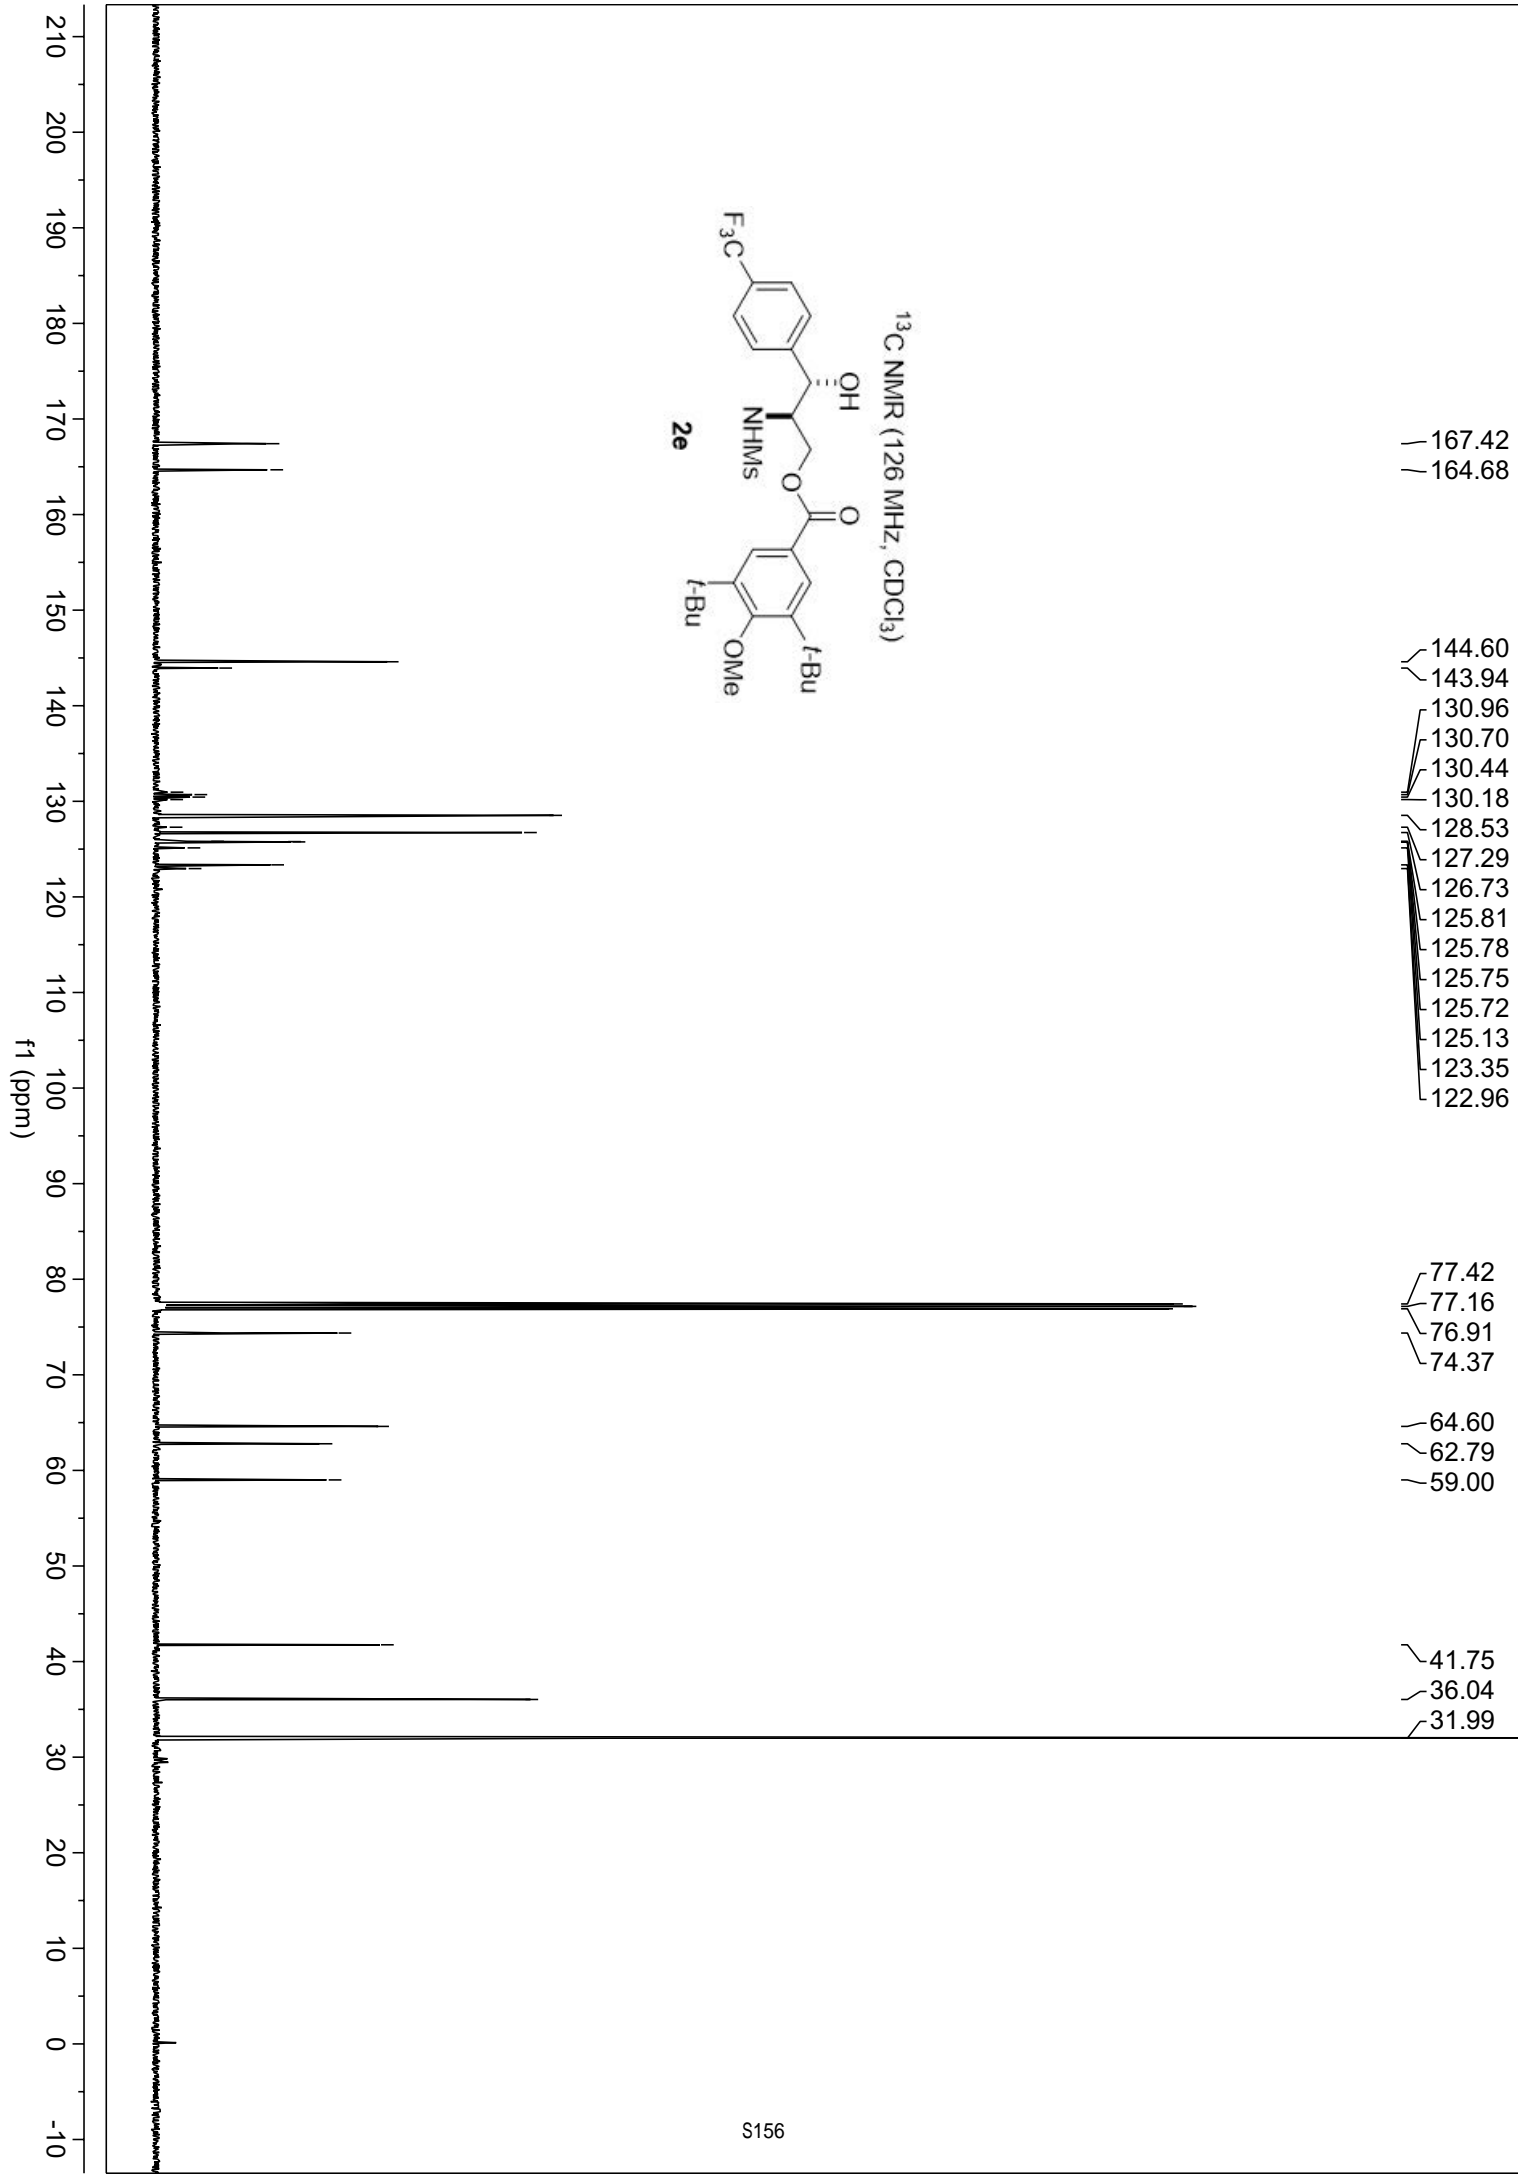

— -62.55

<sup>19</sup>F NMR (471 MHz, CDCl<sub>3</sub>)

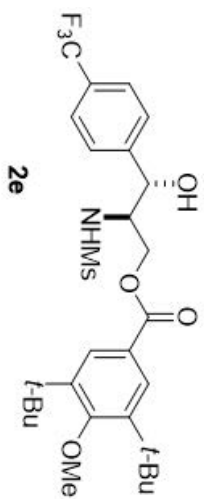

20 10 0 -10 -20 -30 -40 -50 -60 -70 -80 -90 -100 -110 -120 -130 -140 -150 -160 -170 -180 -190 -200 -210 -220  
f1 (ppm)

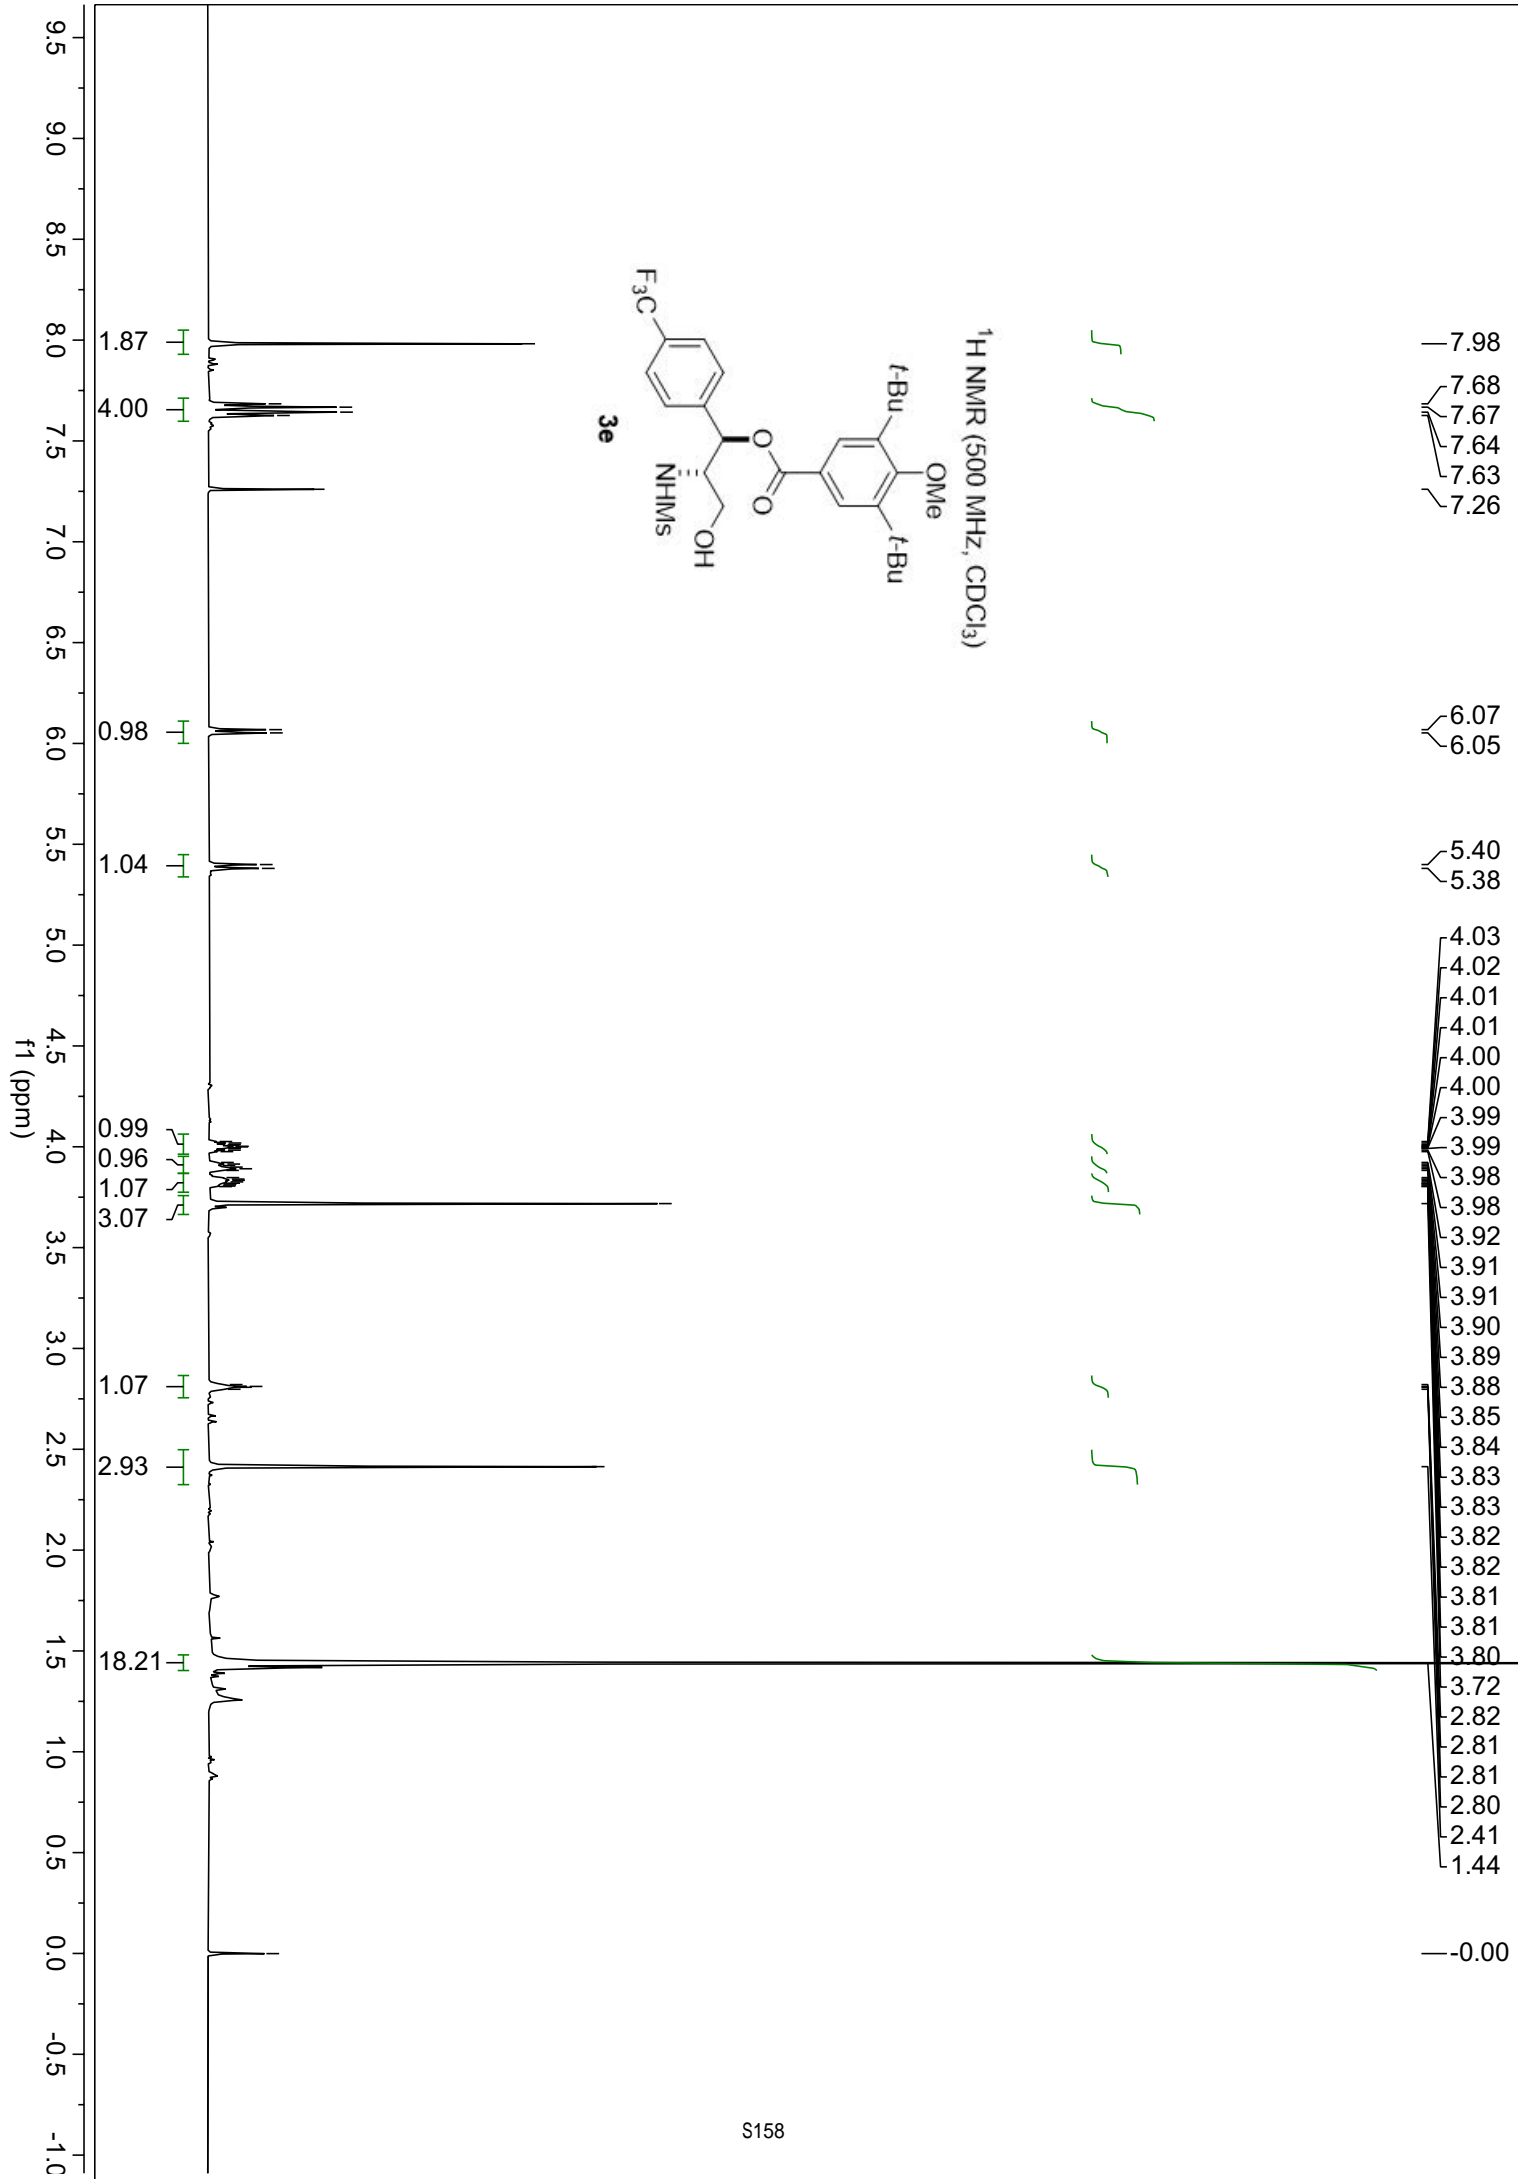

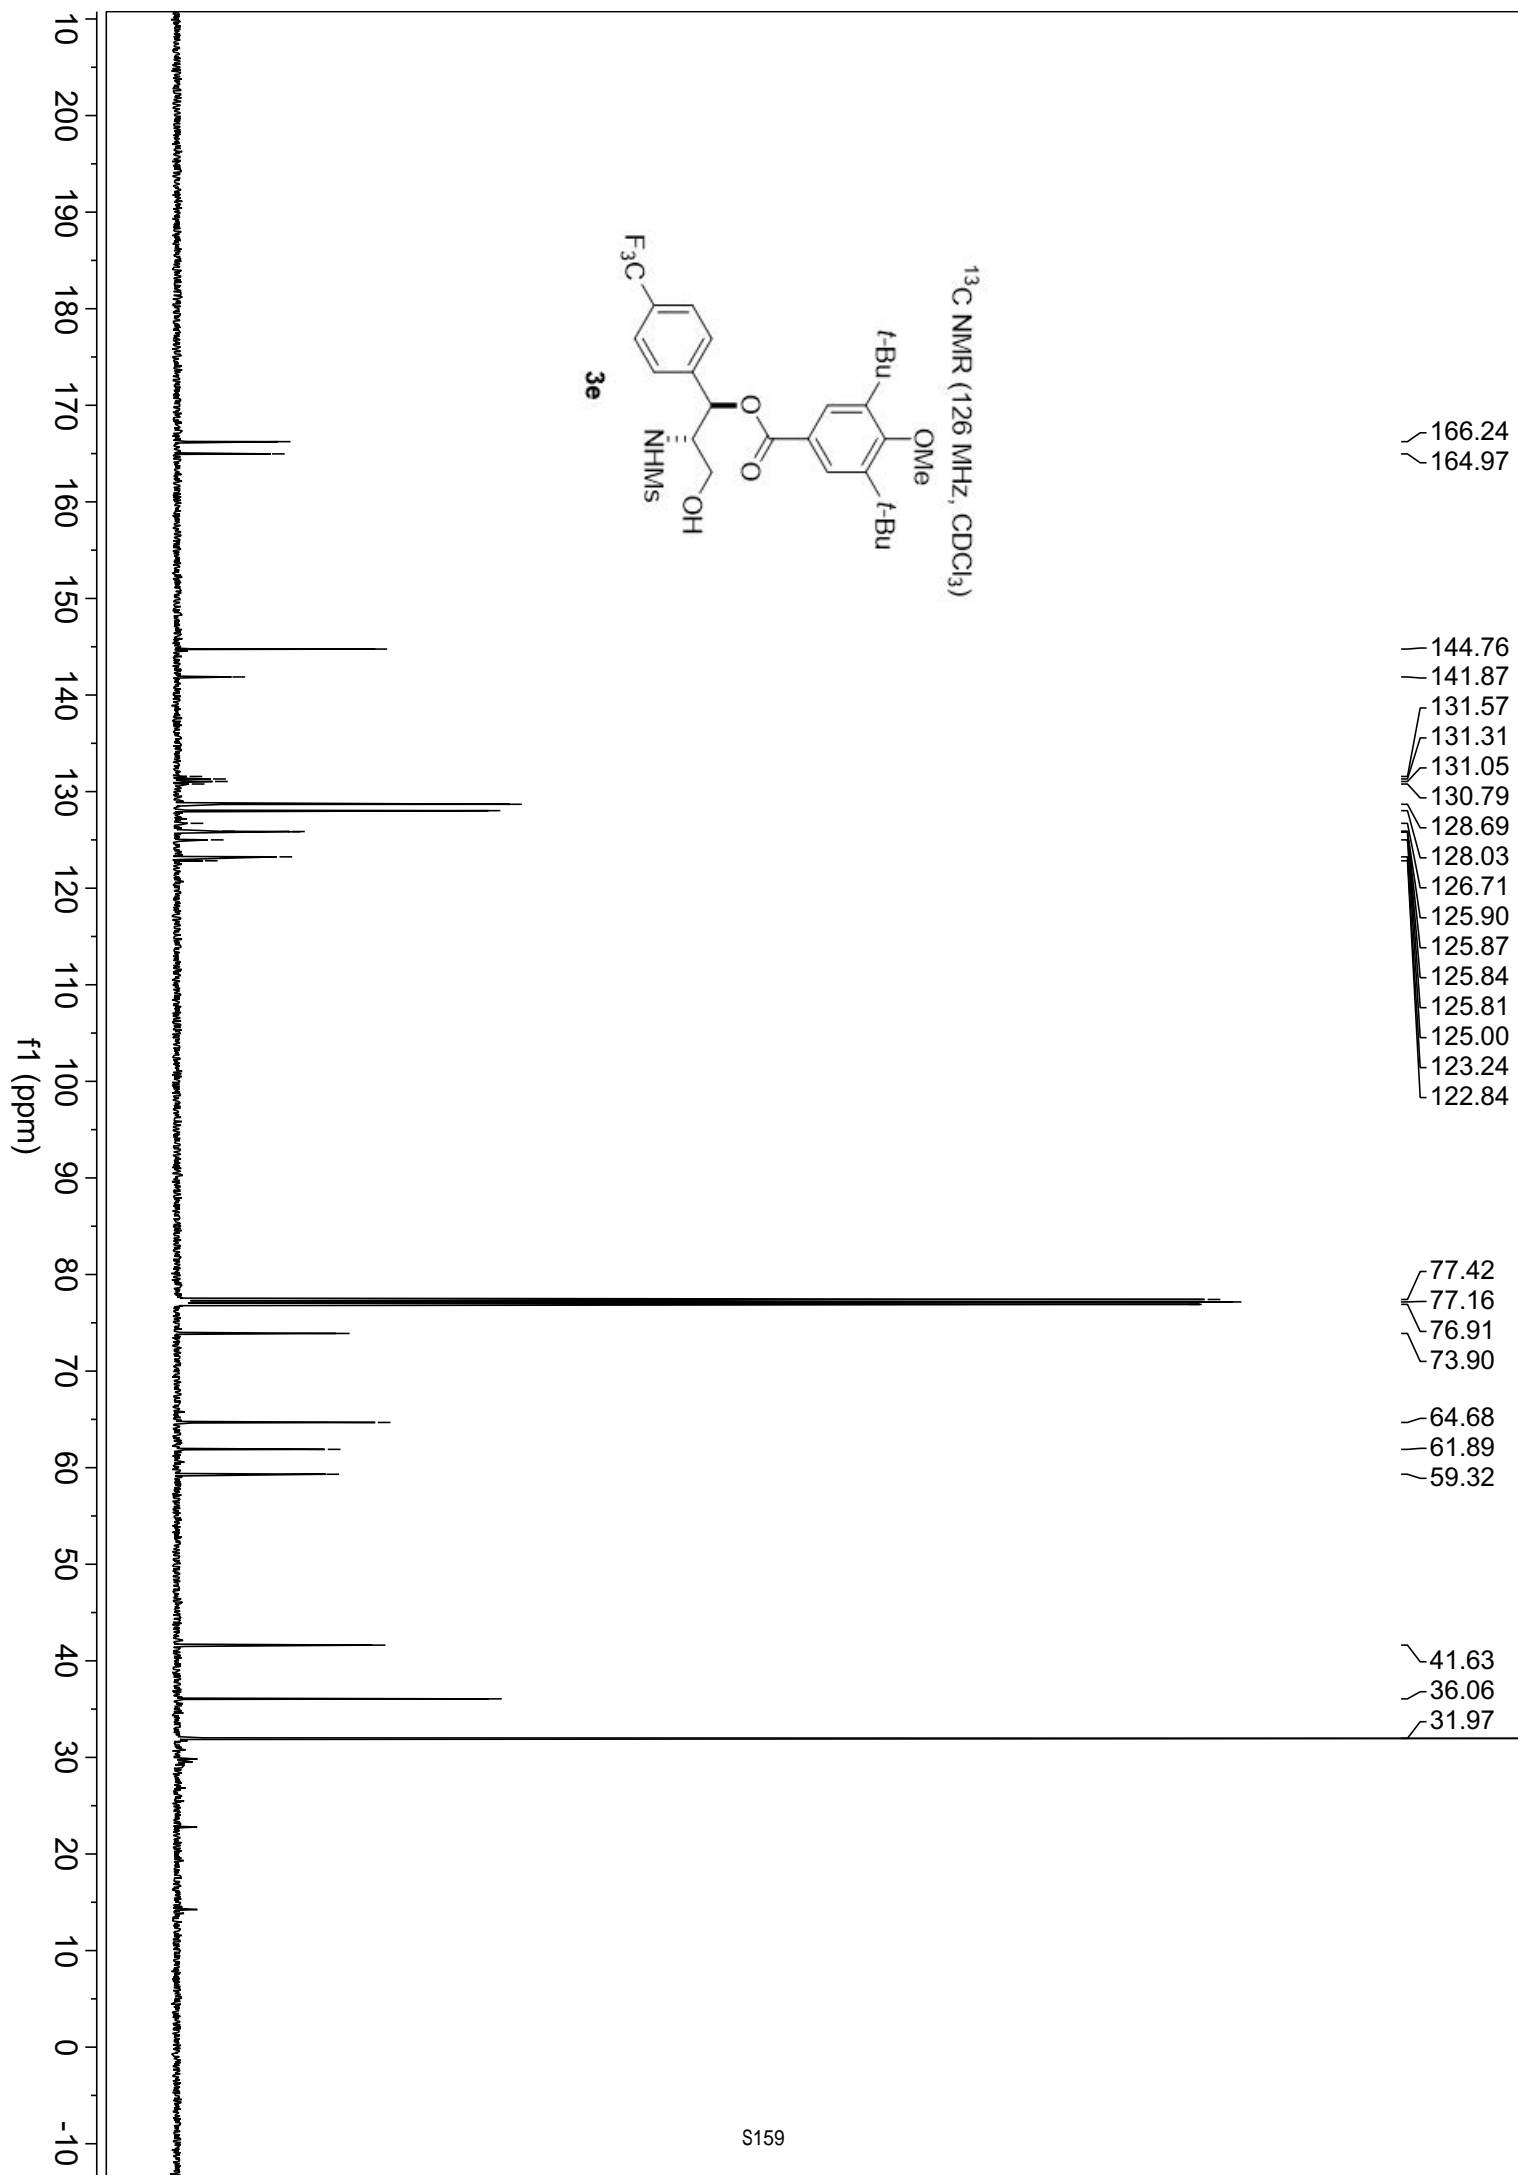

—62.68

<sup>19</sup>F NMR (471 MHz, CDCl<sub>3</sub>)

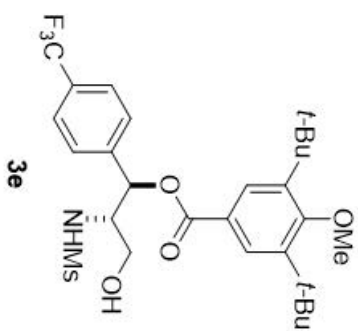

20 10 0 -10 -20 -30 -40 -50 -60 -70 -80 -90 -100 -110 -120 -130 -140 -150 -160 -170 -180 -190 -200 -210 -220  
f1 (ppm)



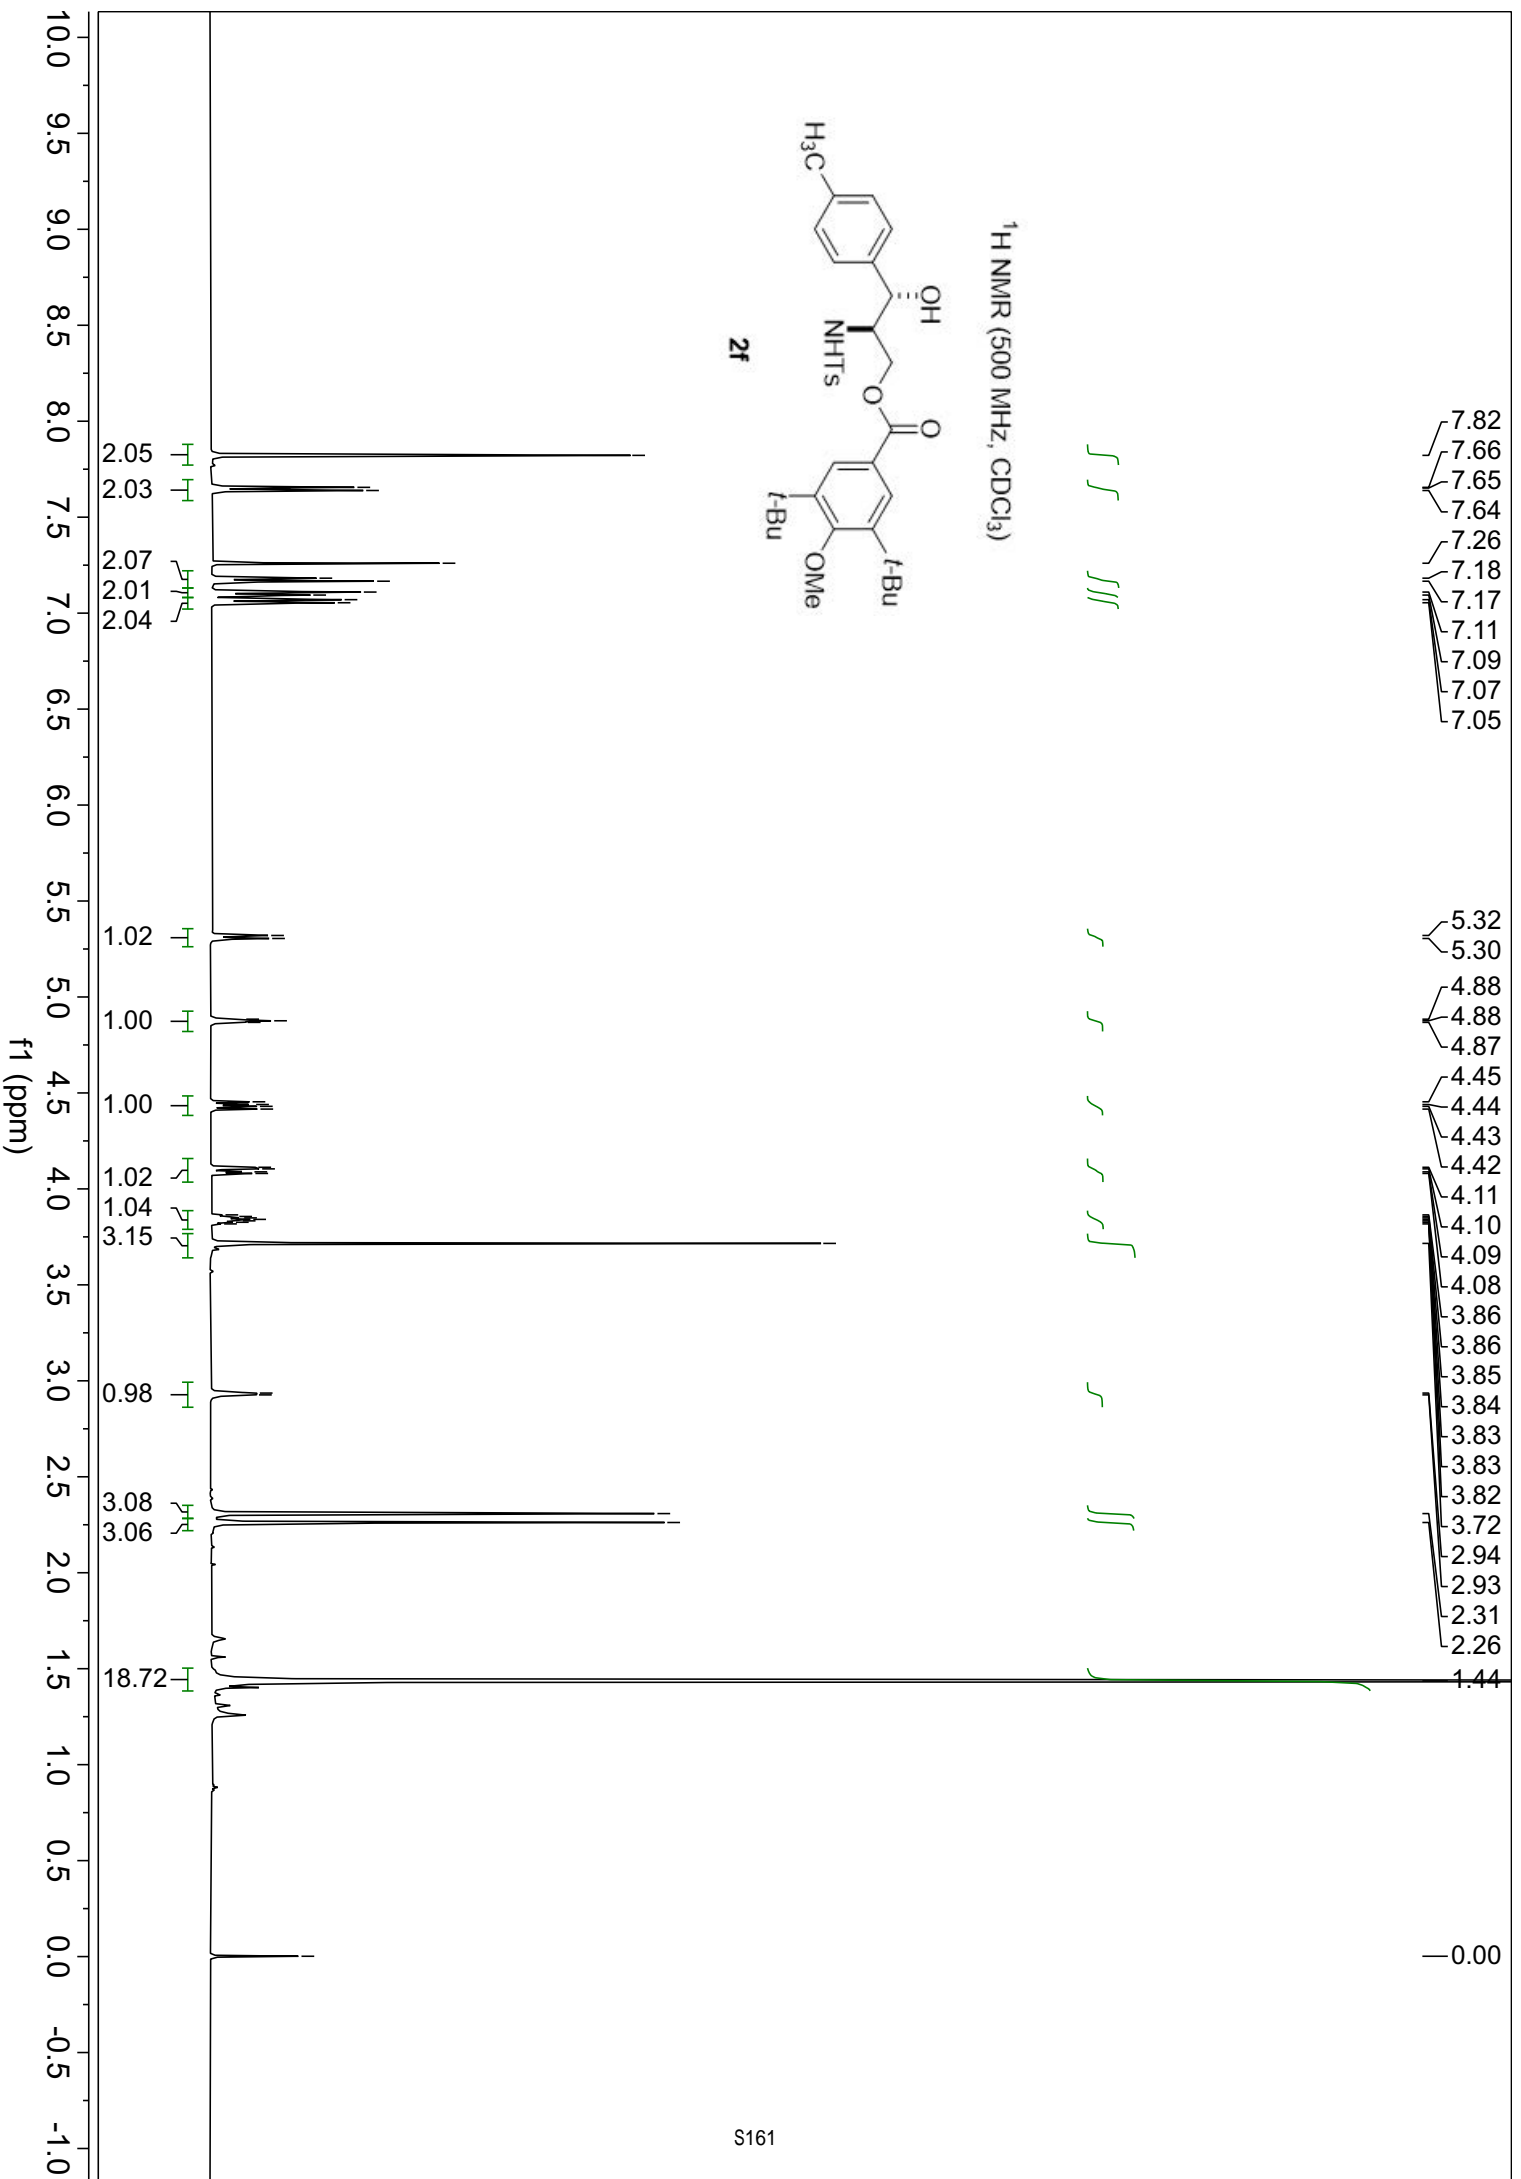

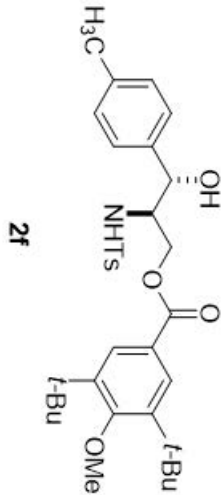

<sup>13</sup>C NMR (126 MHz, CDCl<sub>3</sub>)

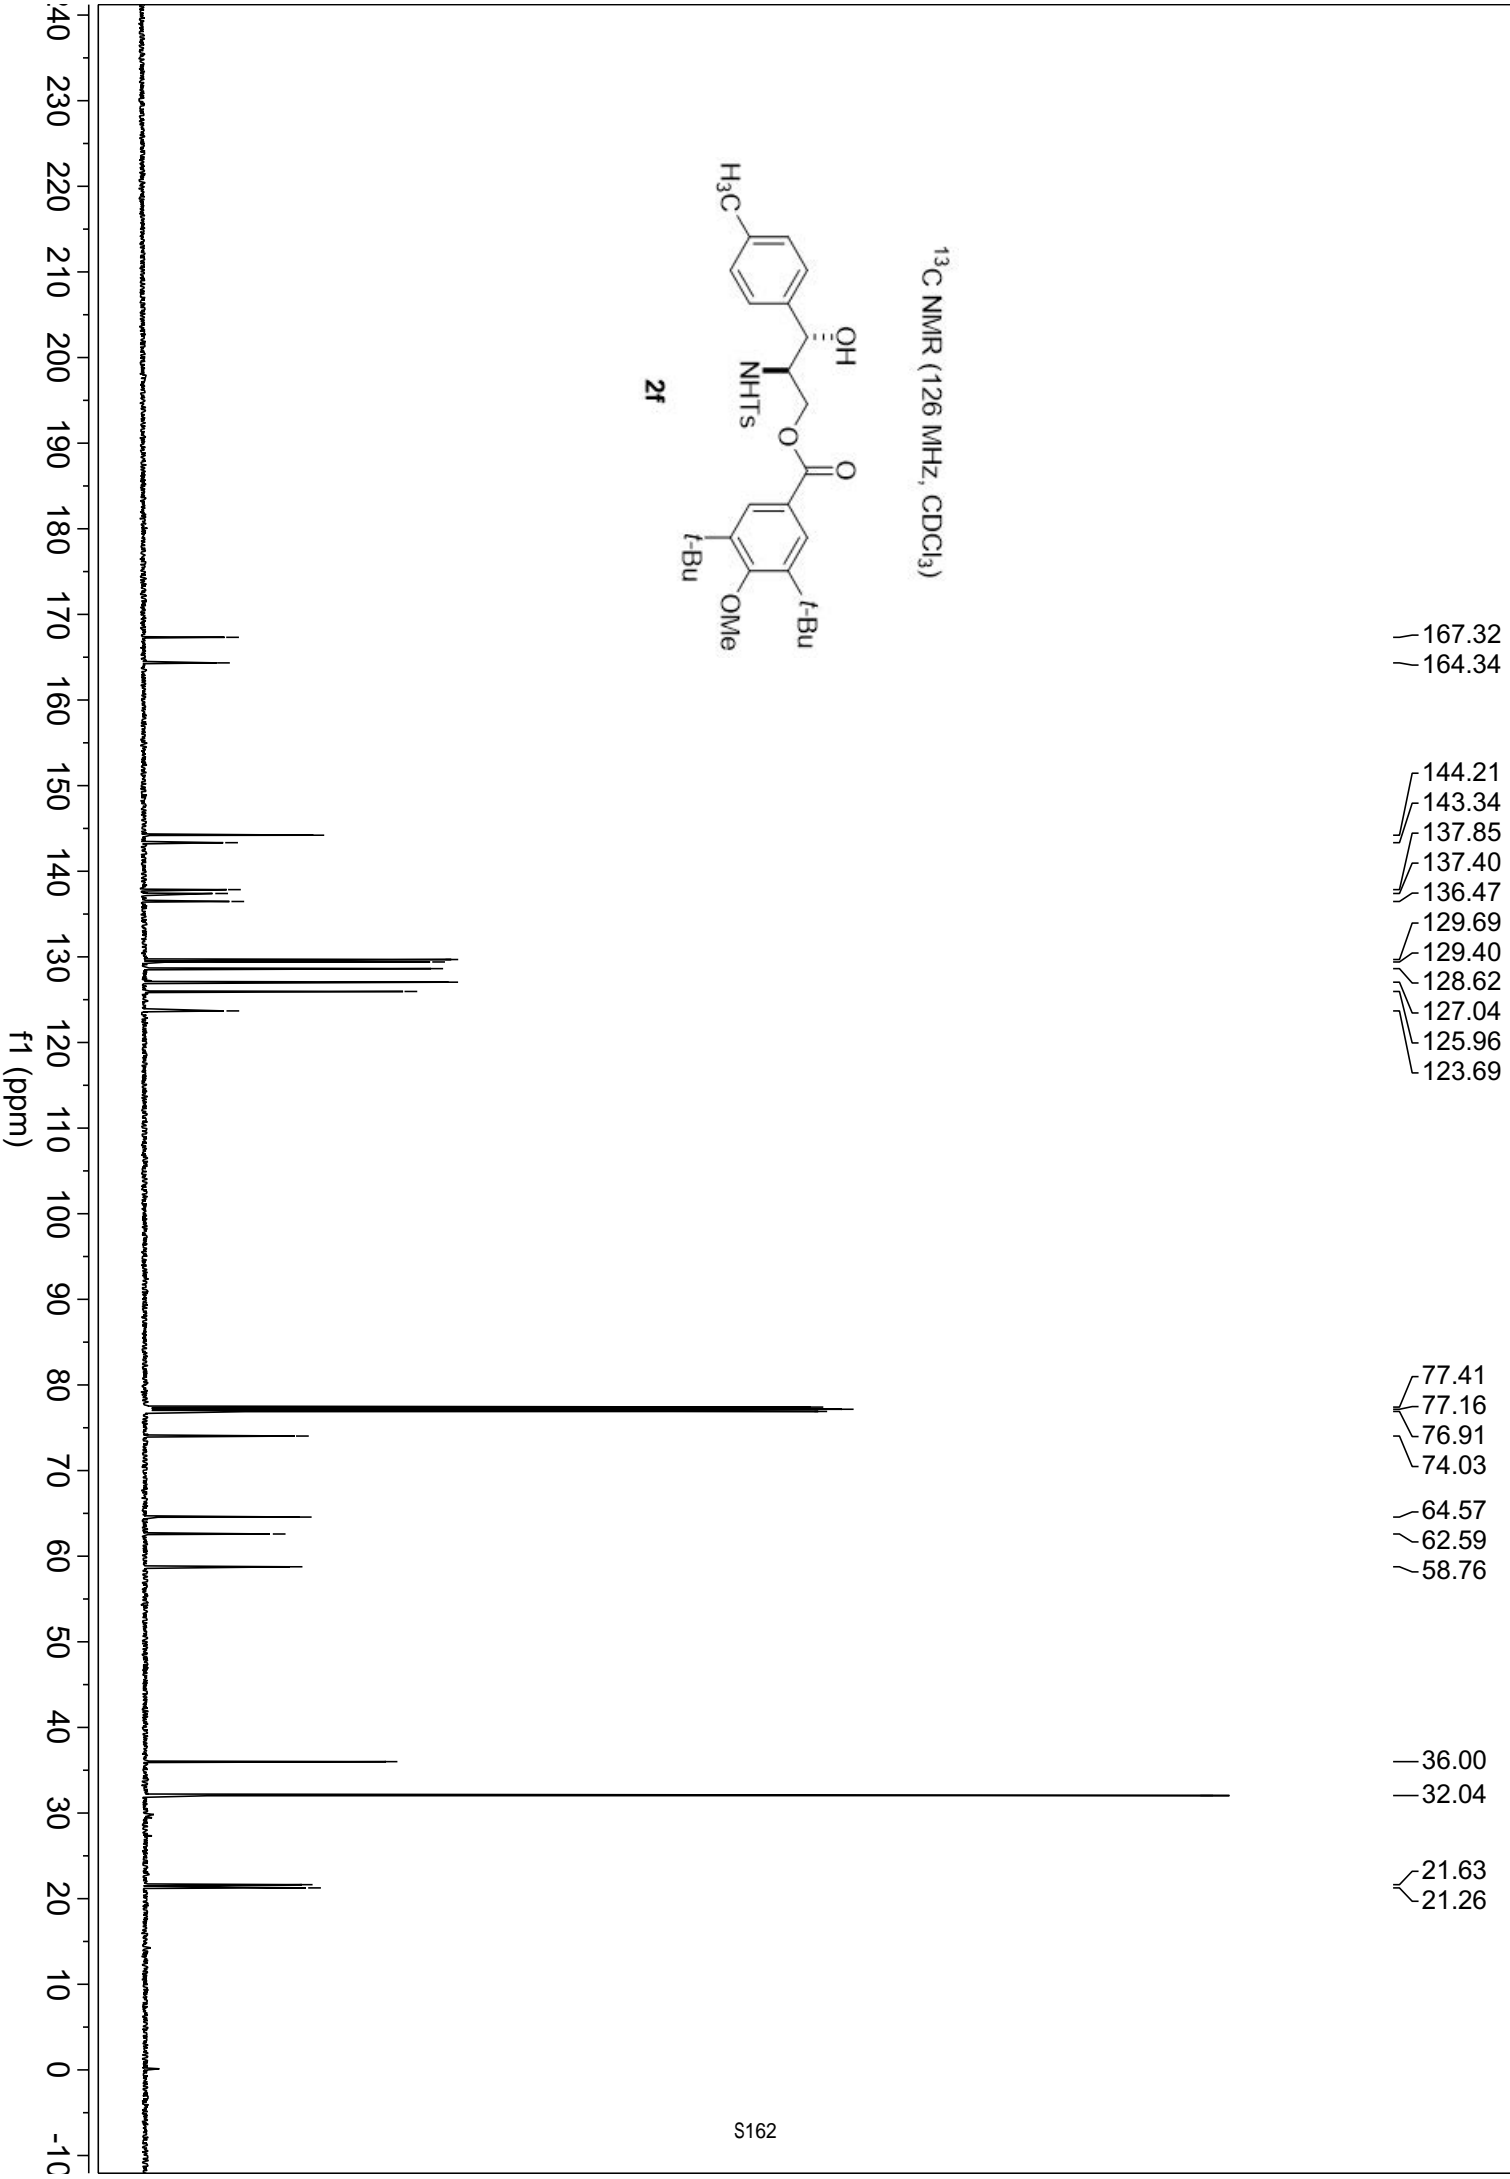

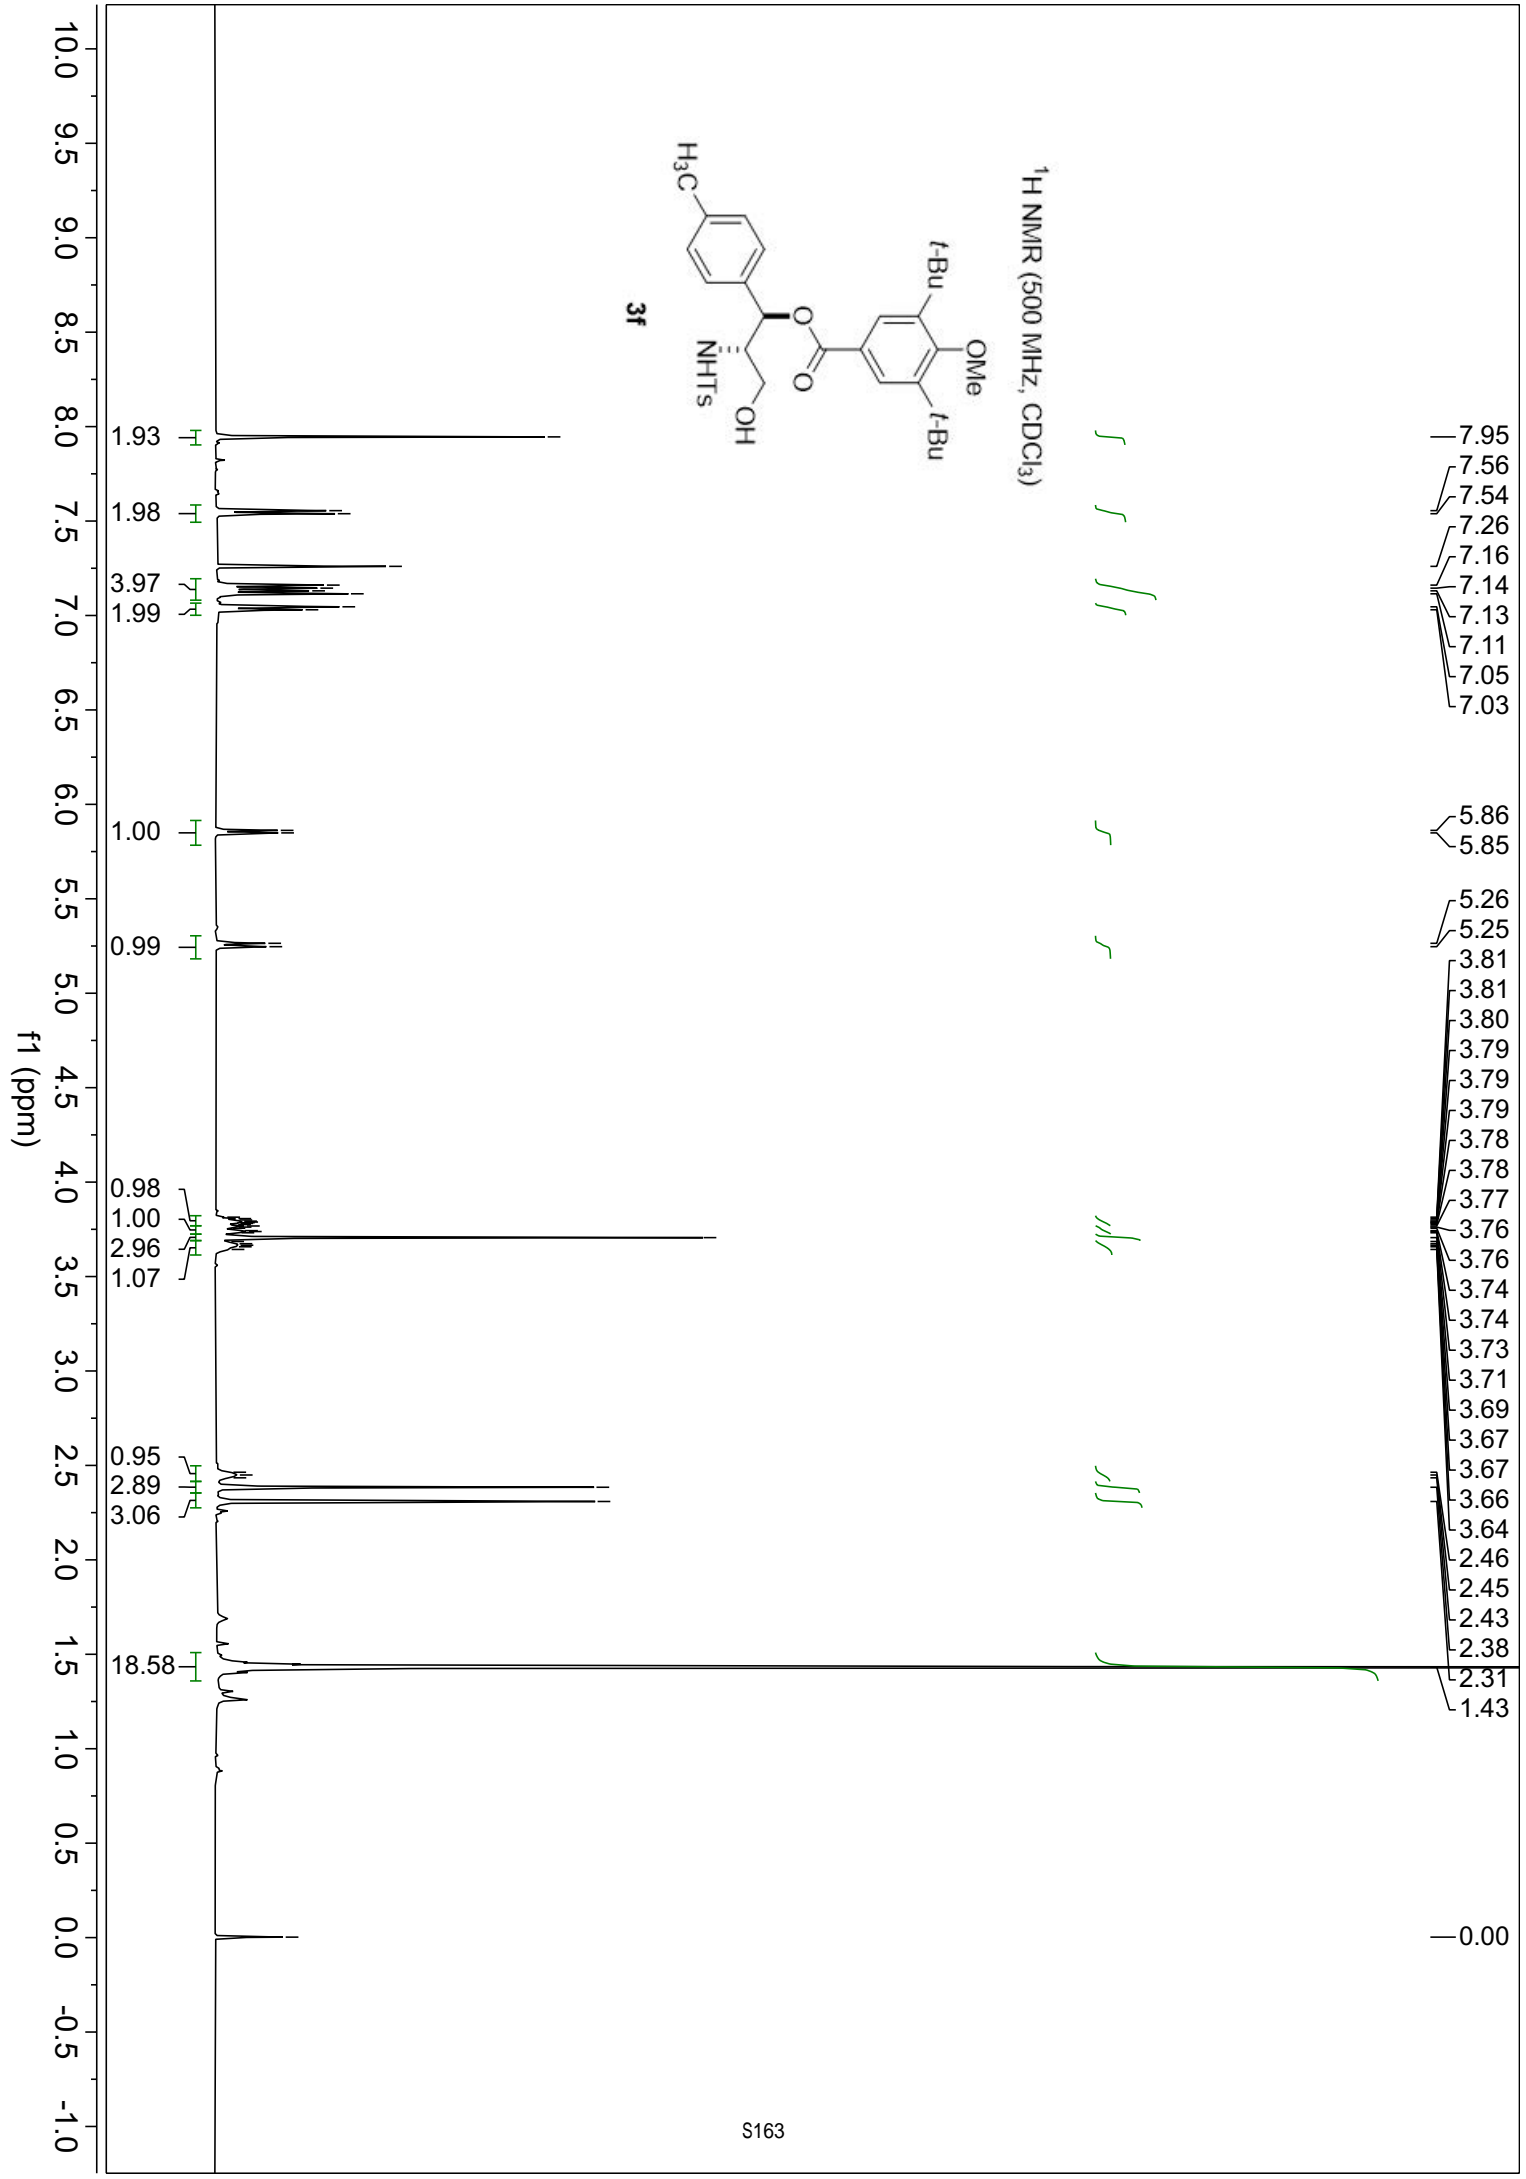

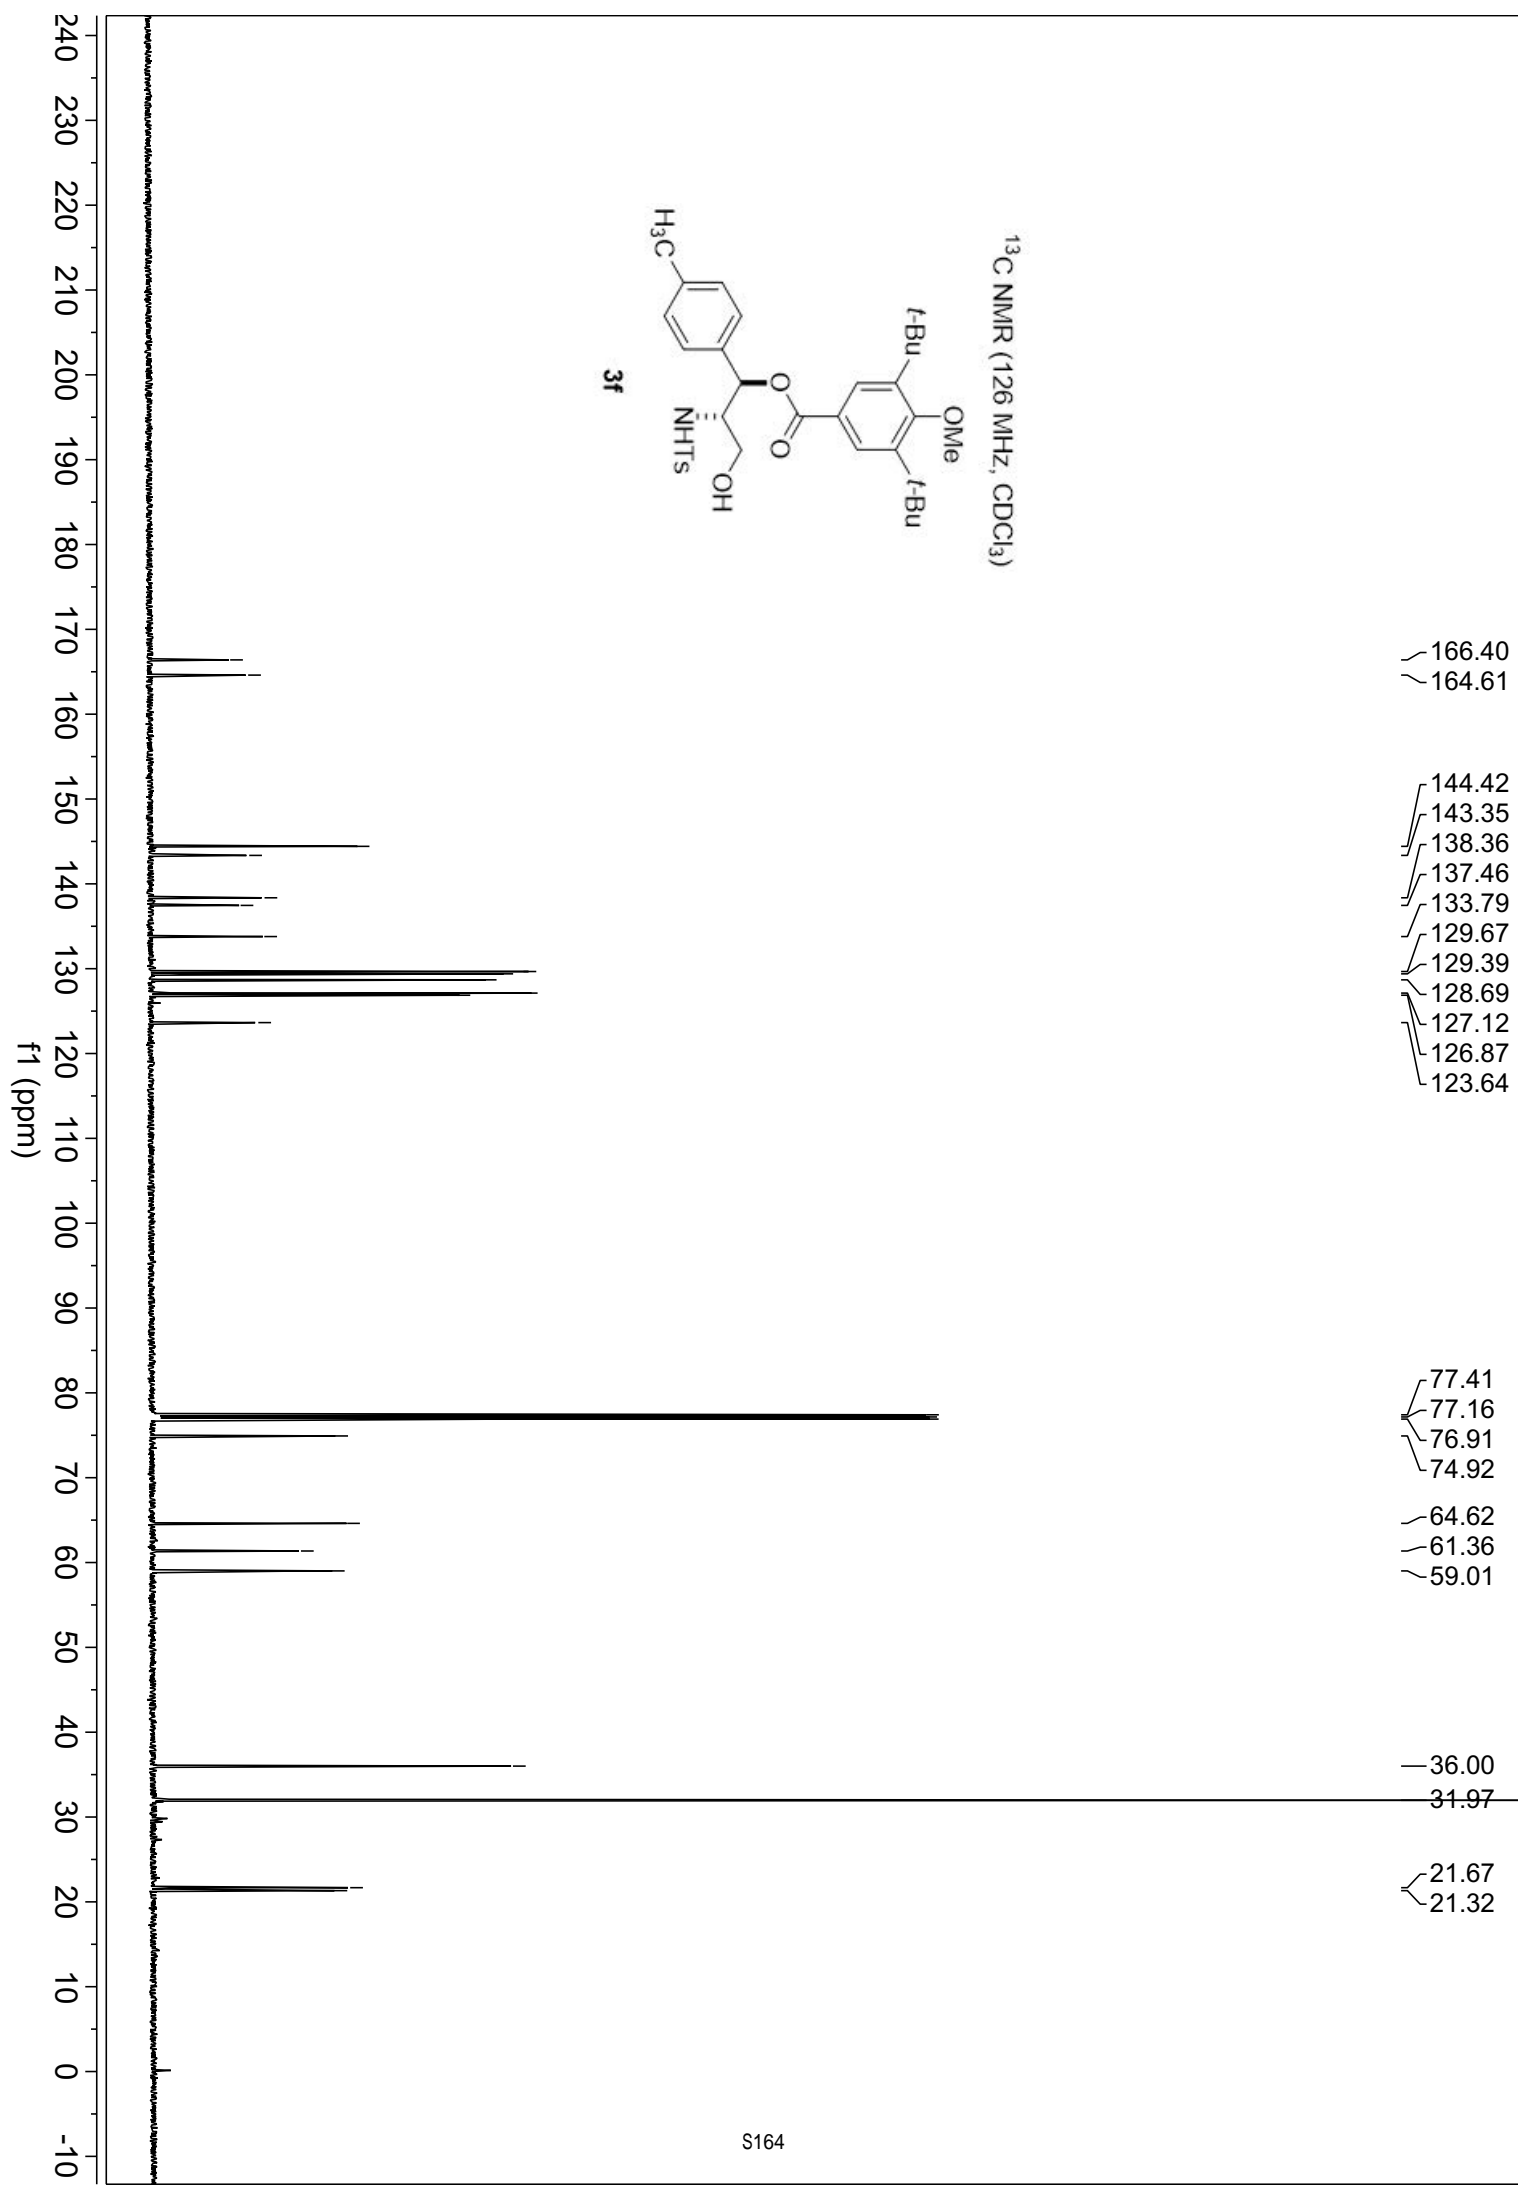

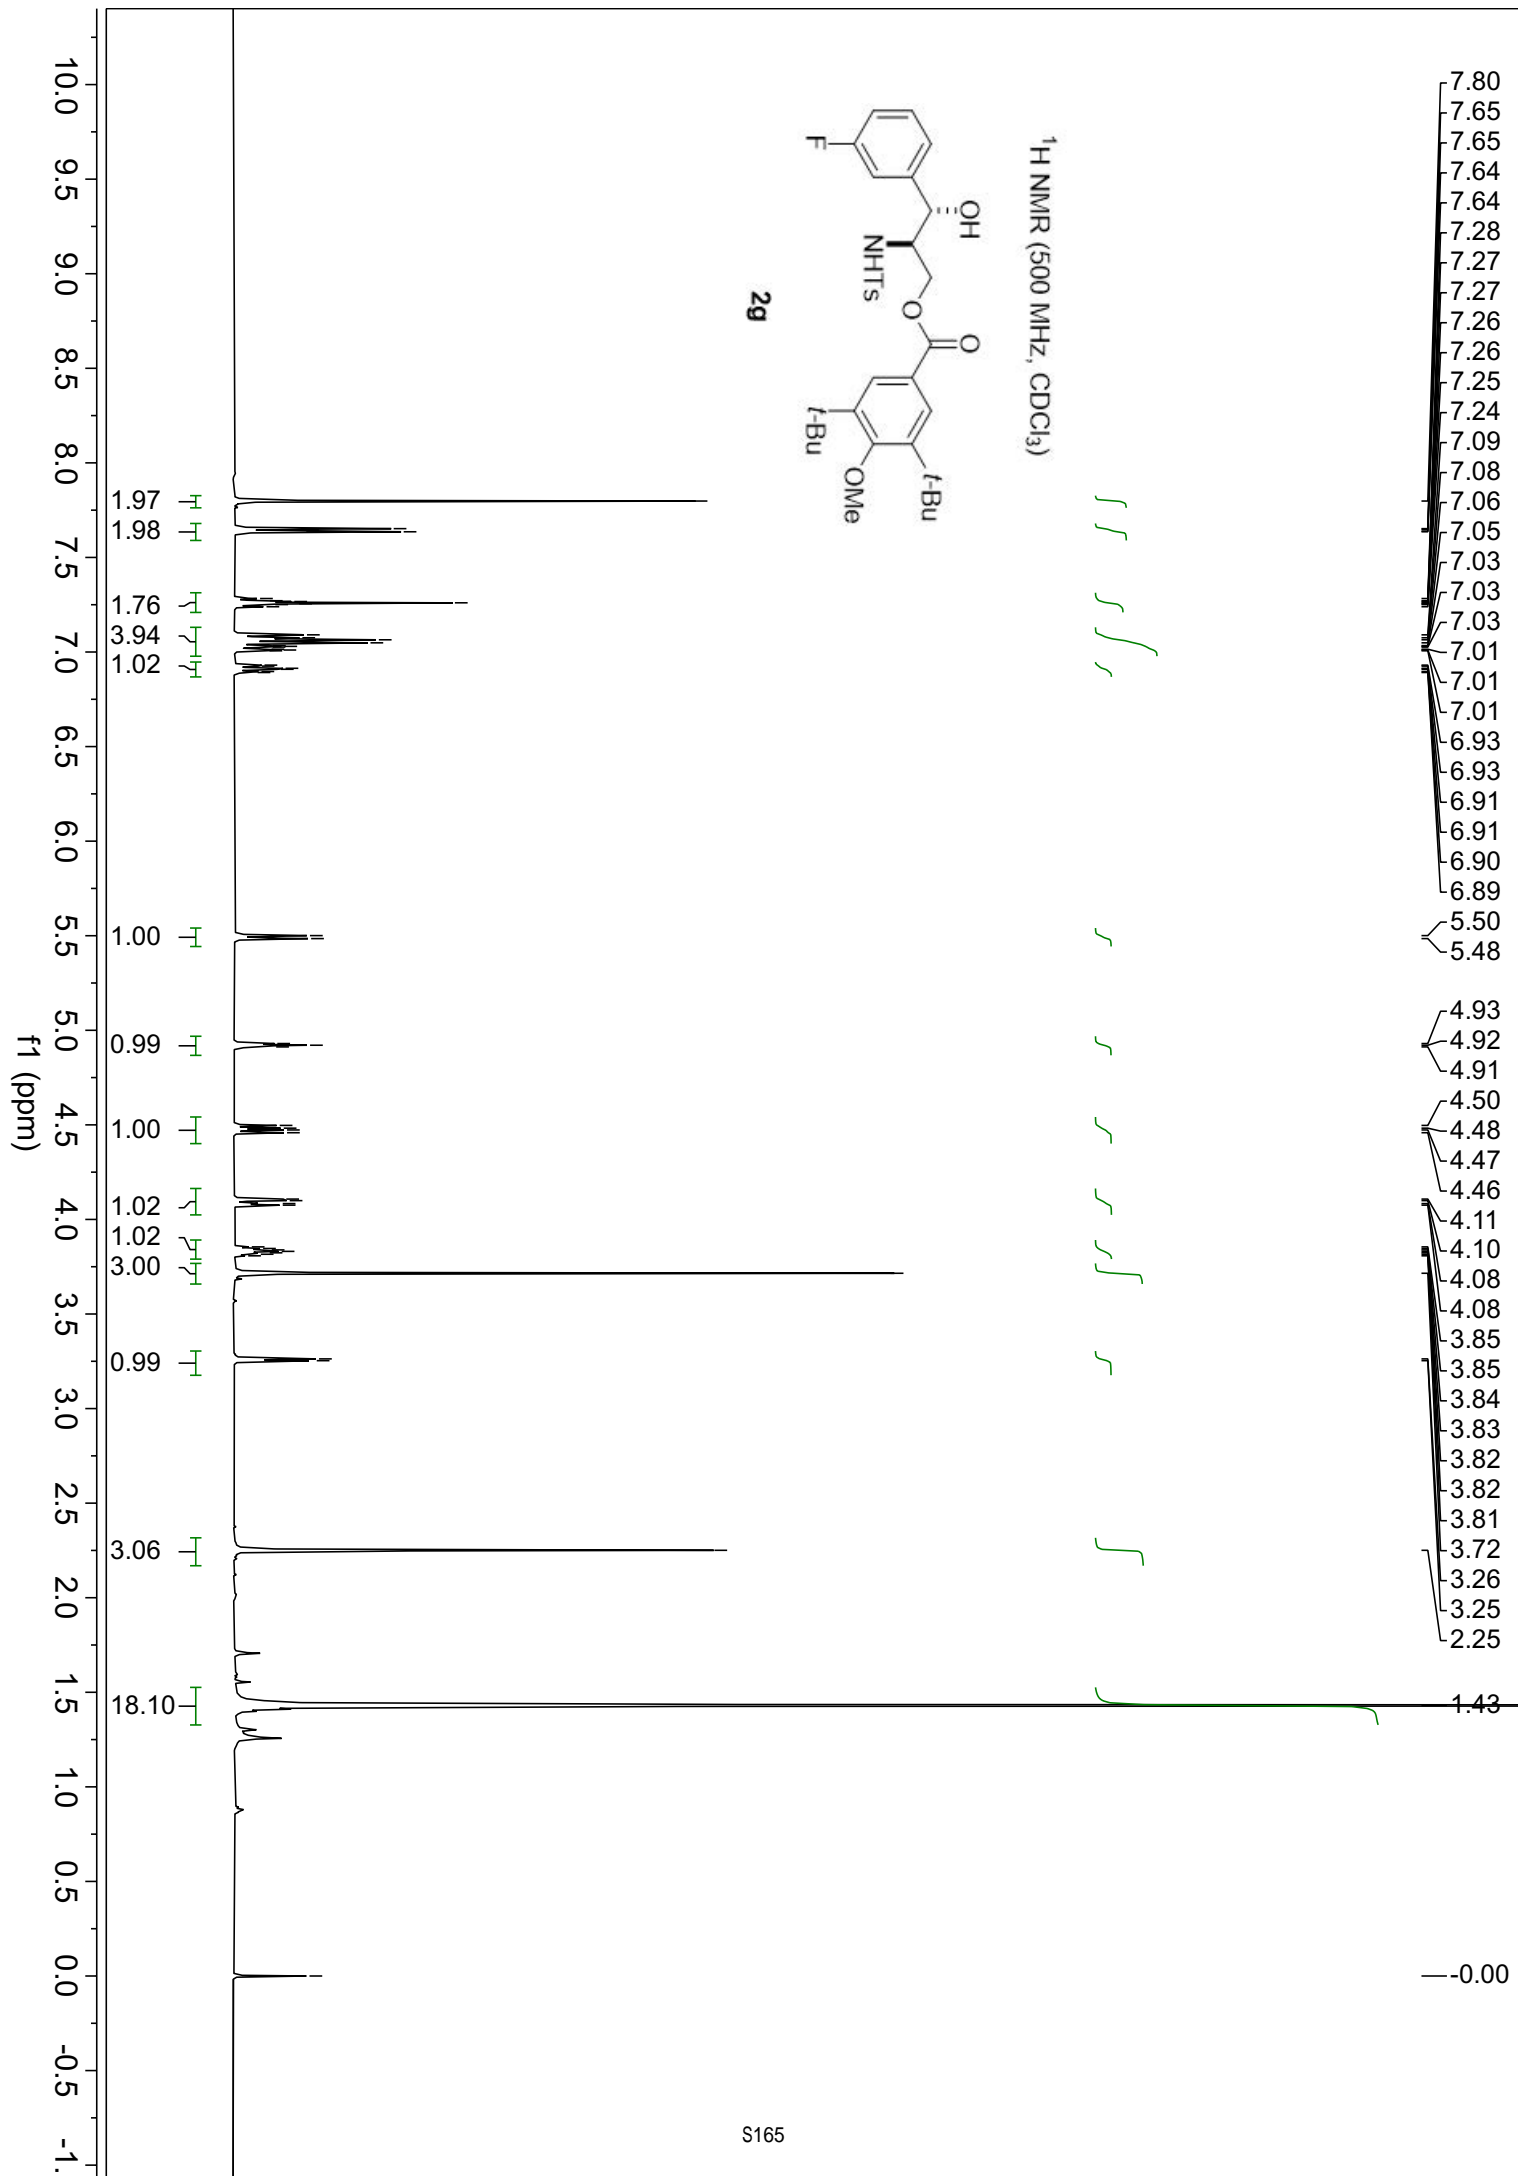

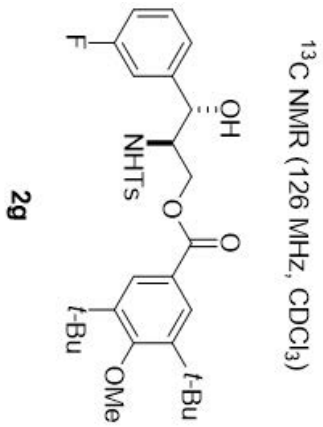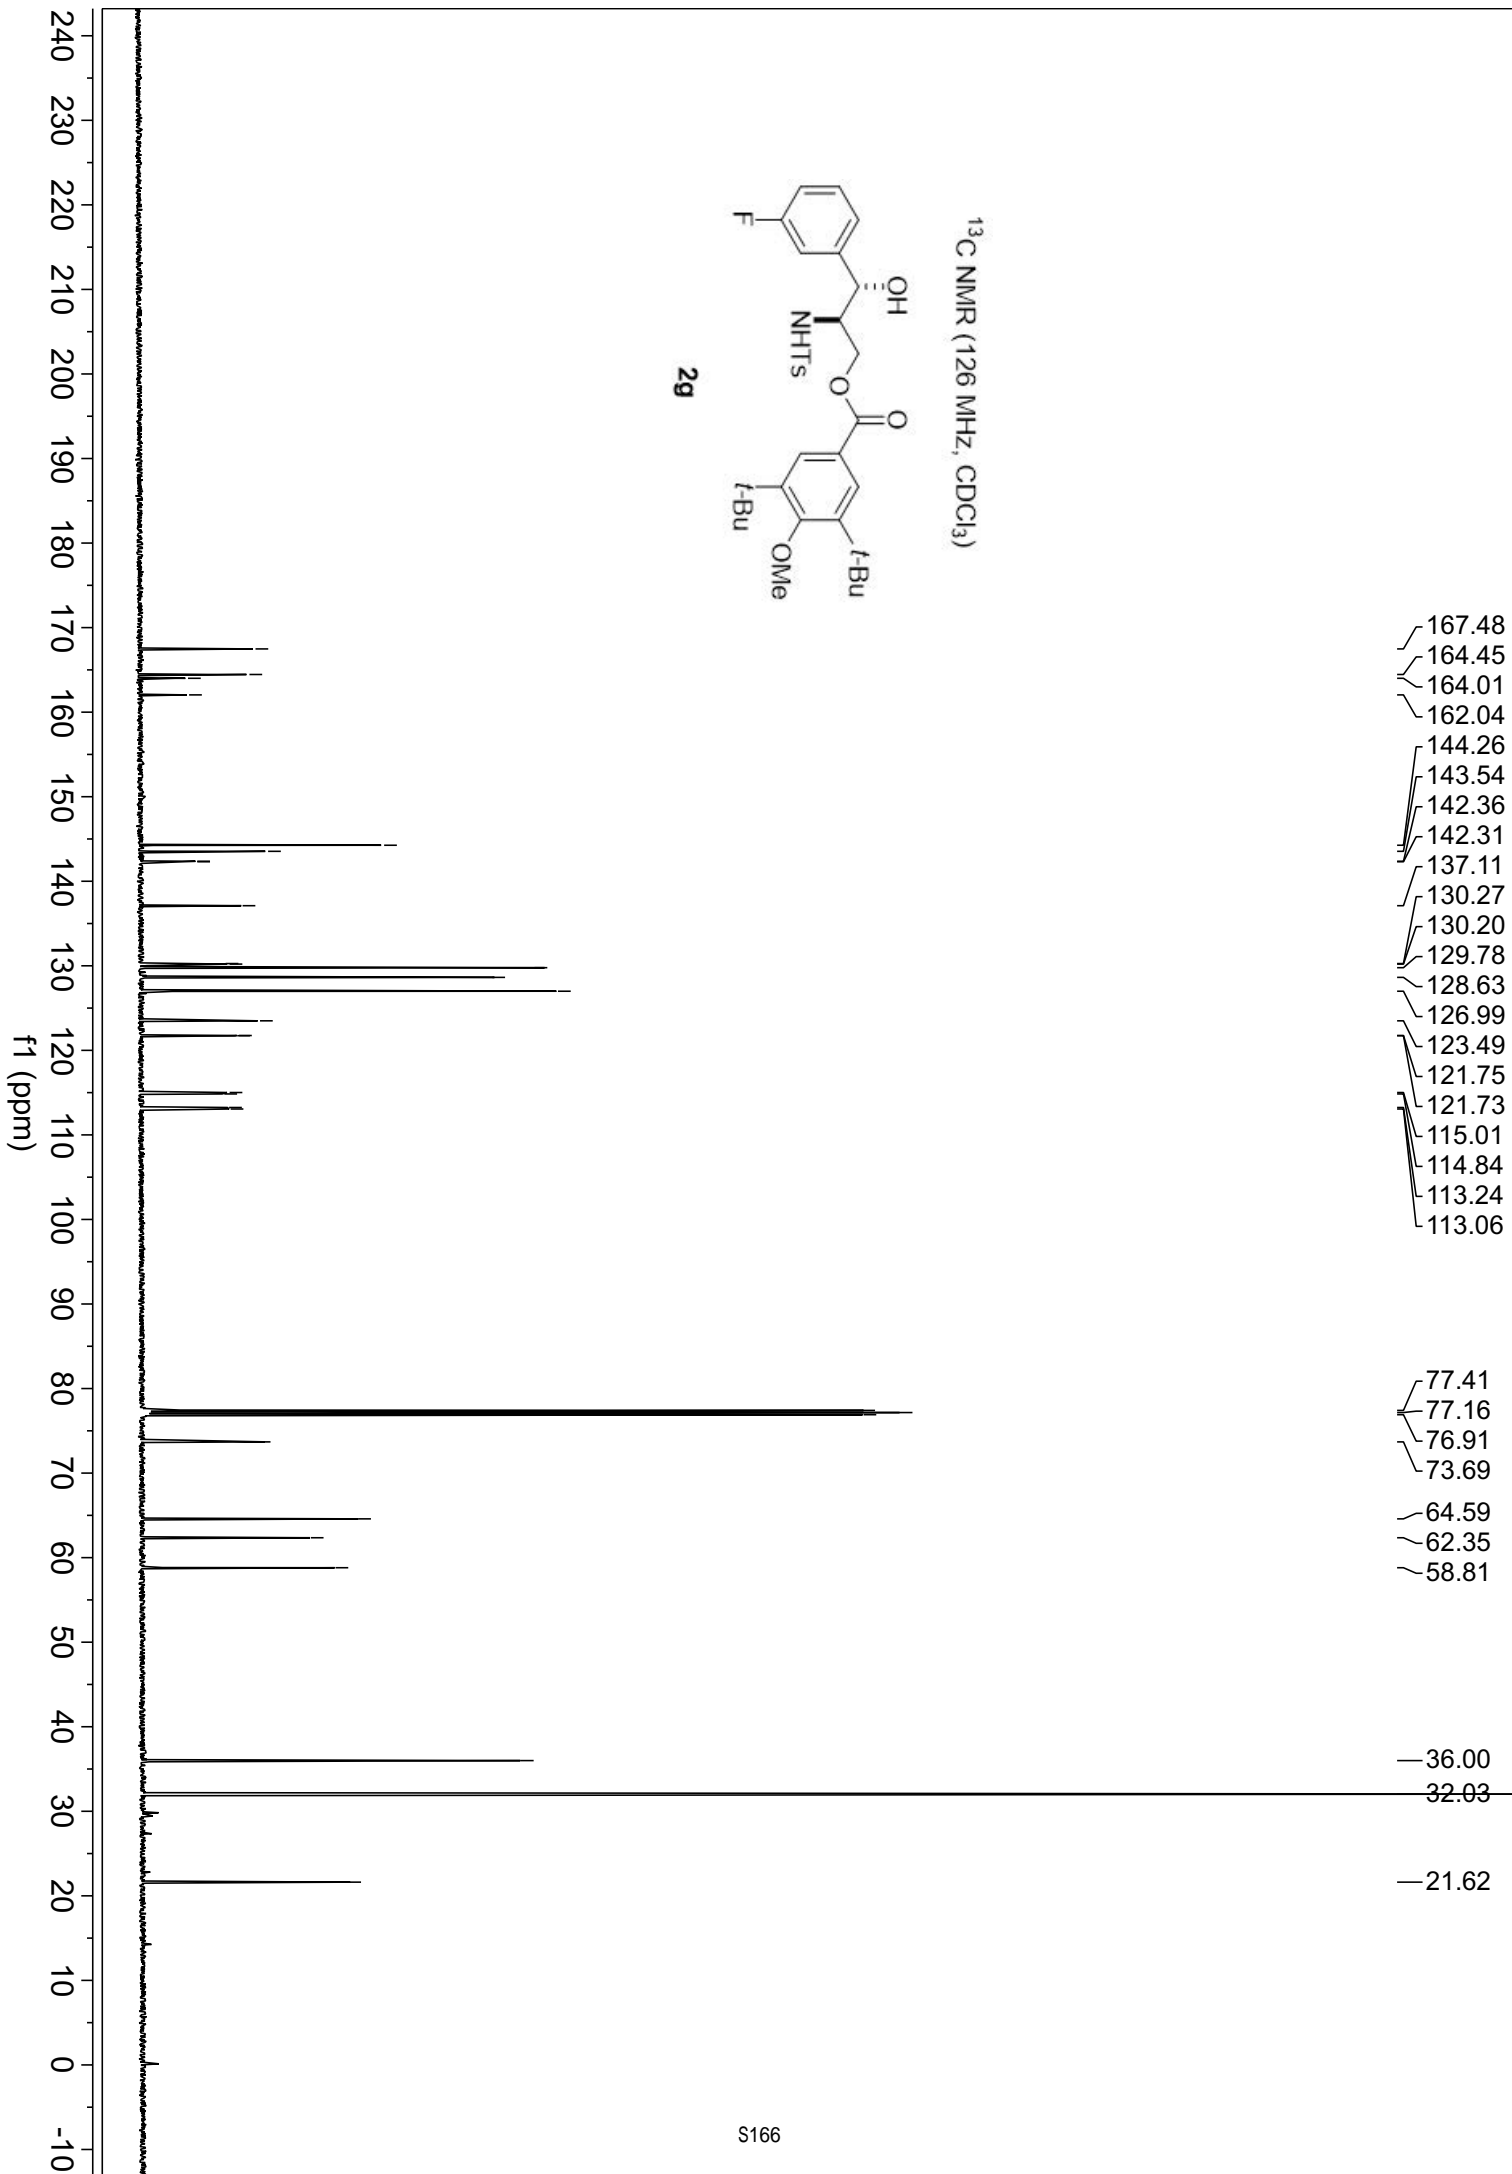

— -112.00

<sup>19</sup>F NMR (471 MHz, CDCl<sub>3</sub>)

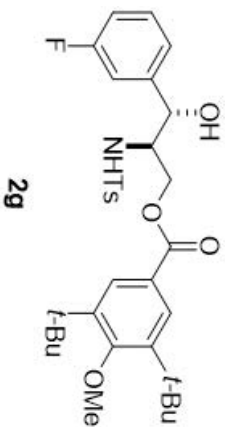

20 10 0 -10 -20 -30 -40 -50 -60 -70 -80 -90 -100 -110 -120 -130 -140 -150 -160 -170 -180 -190 -200 -210 -22

f1 (ppm)

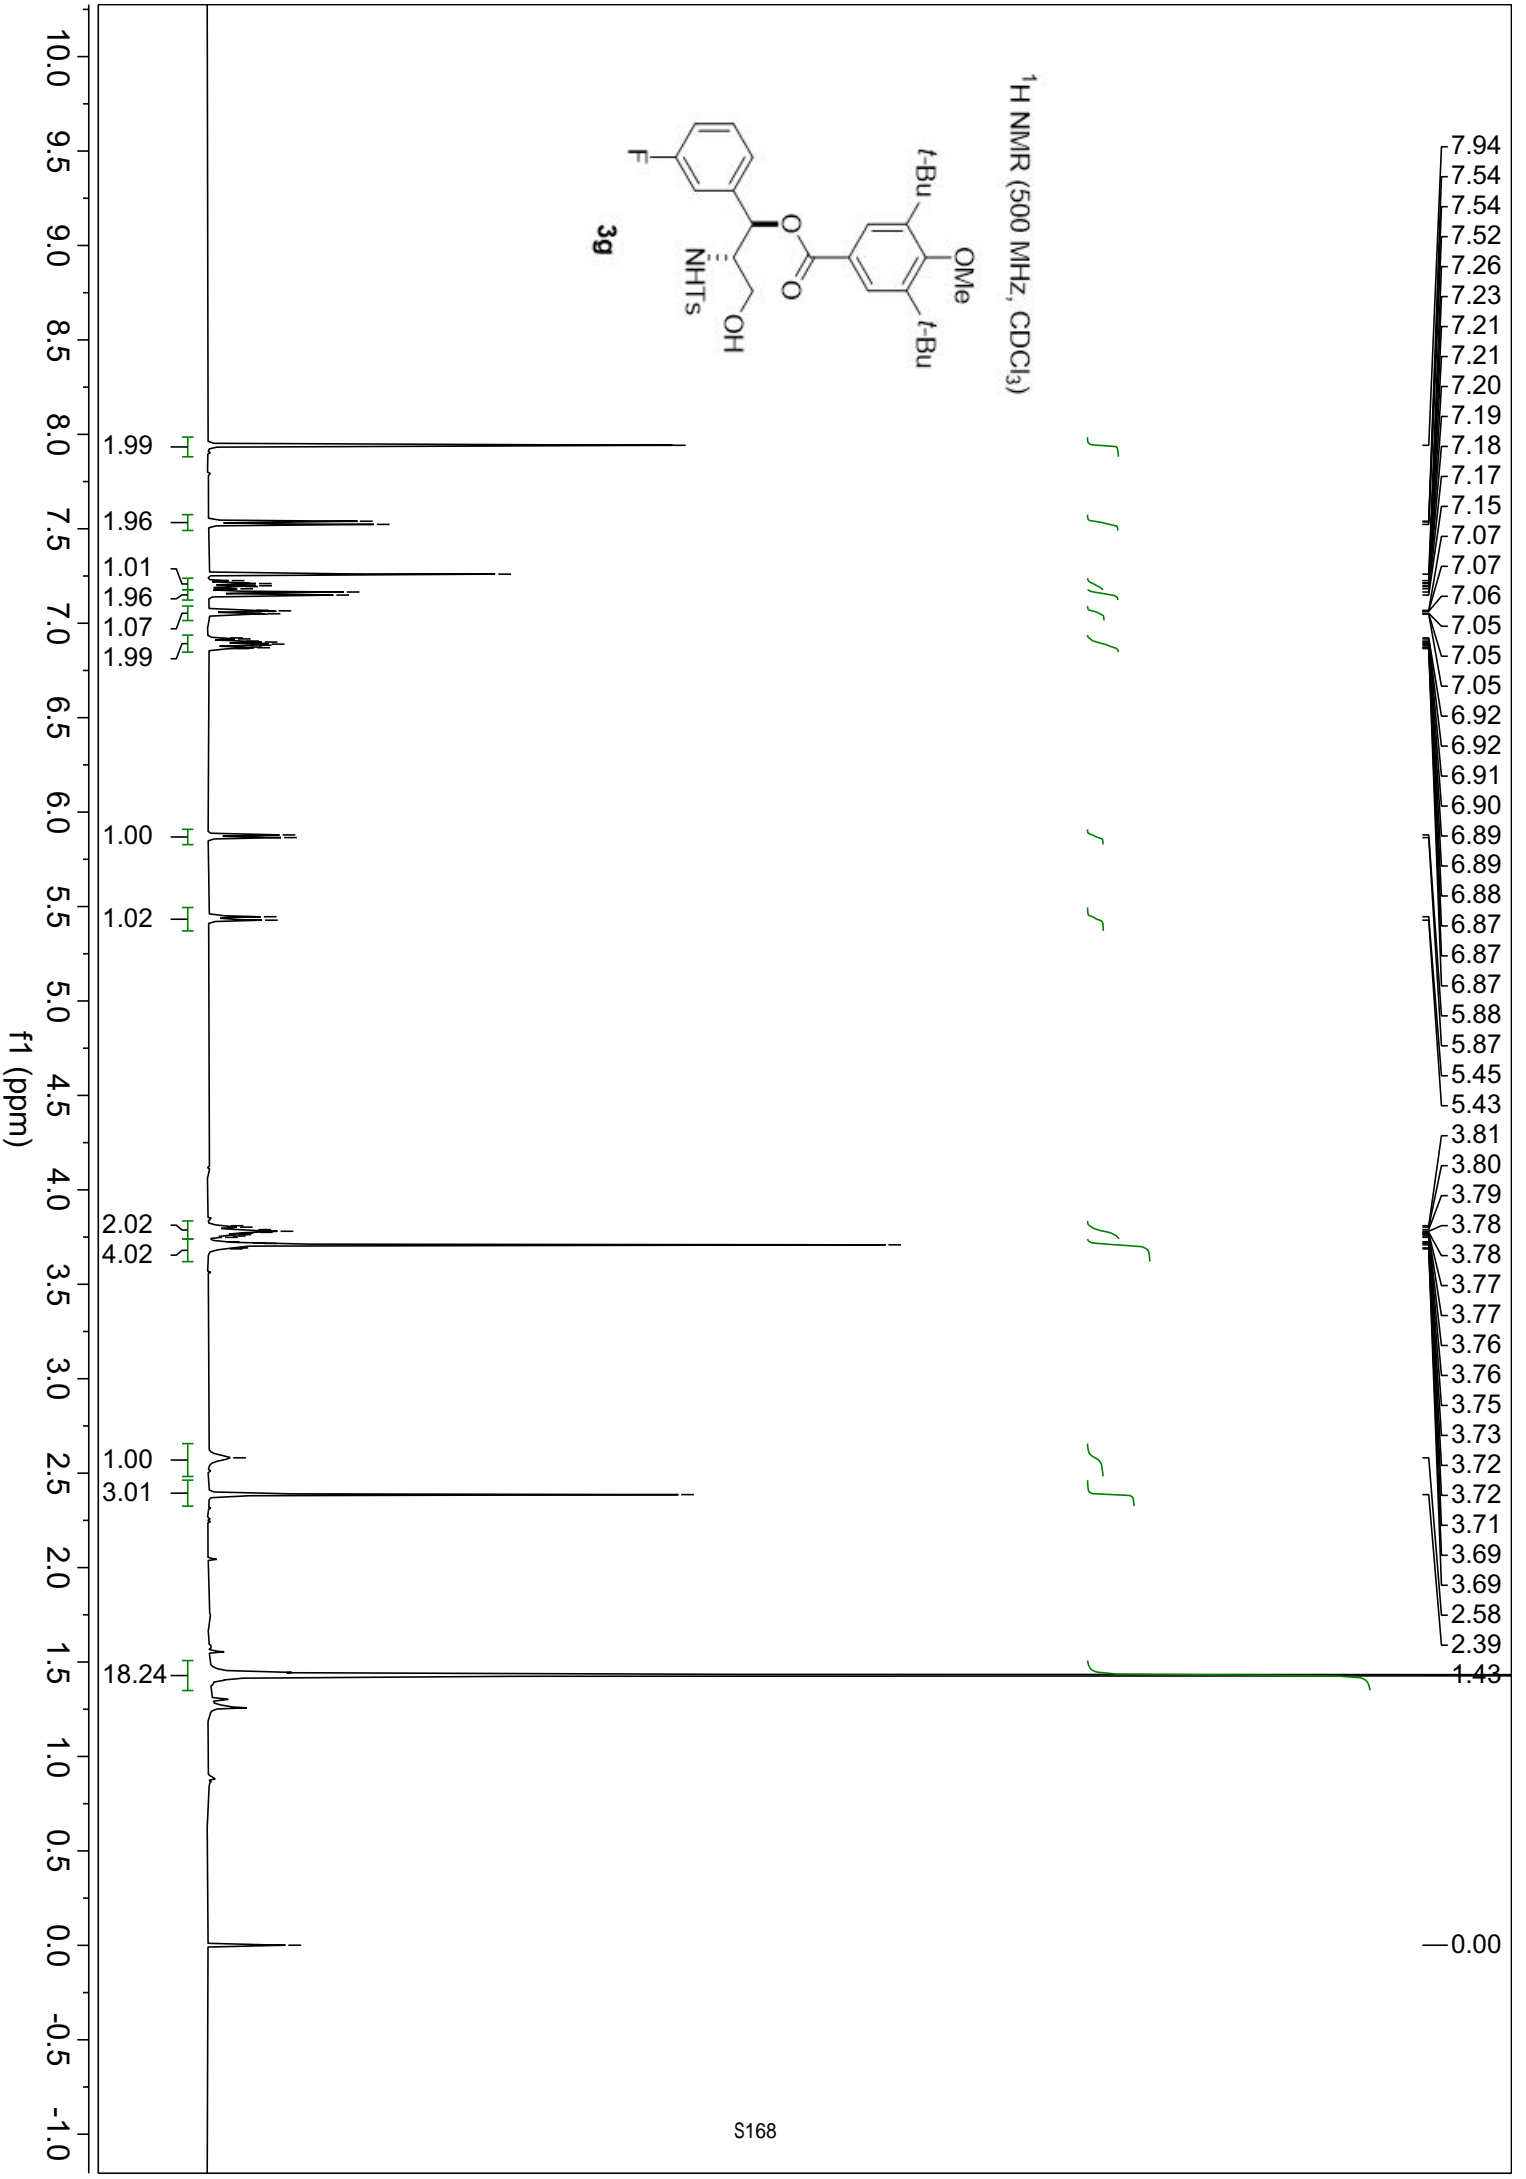



<sup>13</sup>C NMR (126 MHz, CDCl<sub>3</sub>)

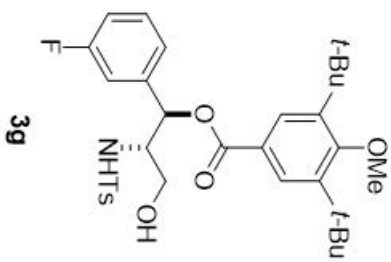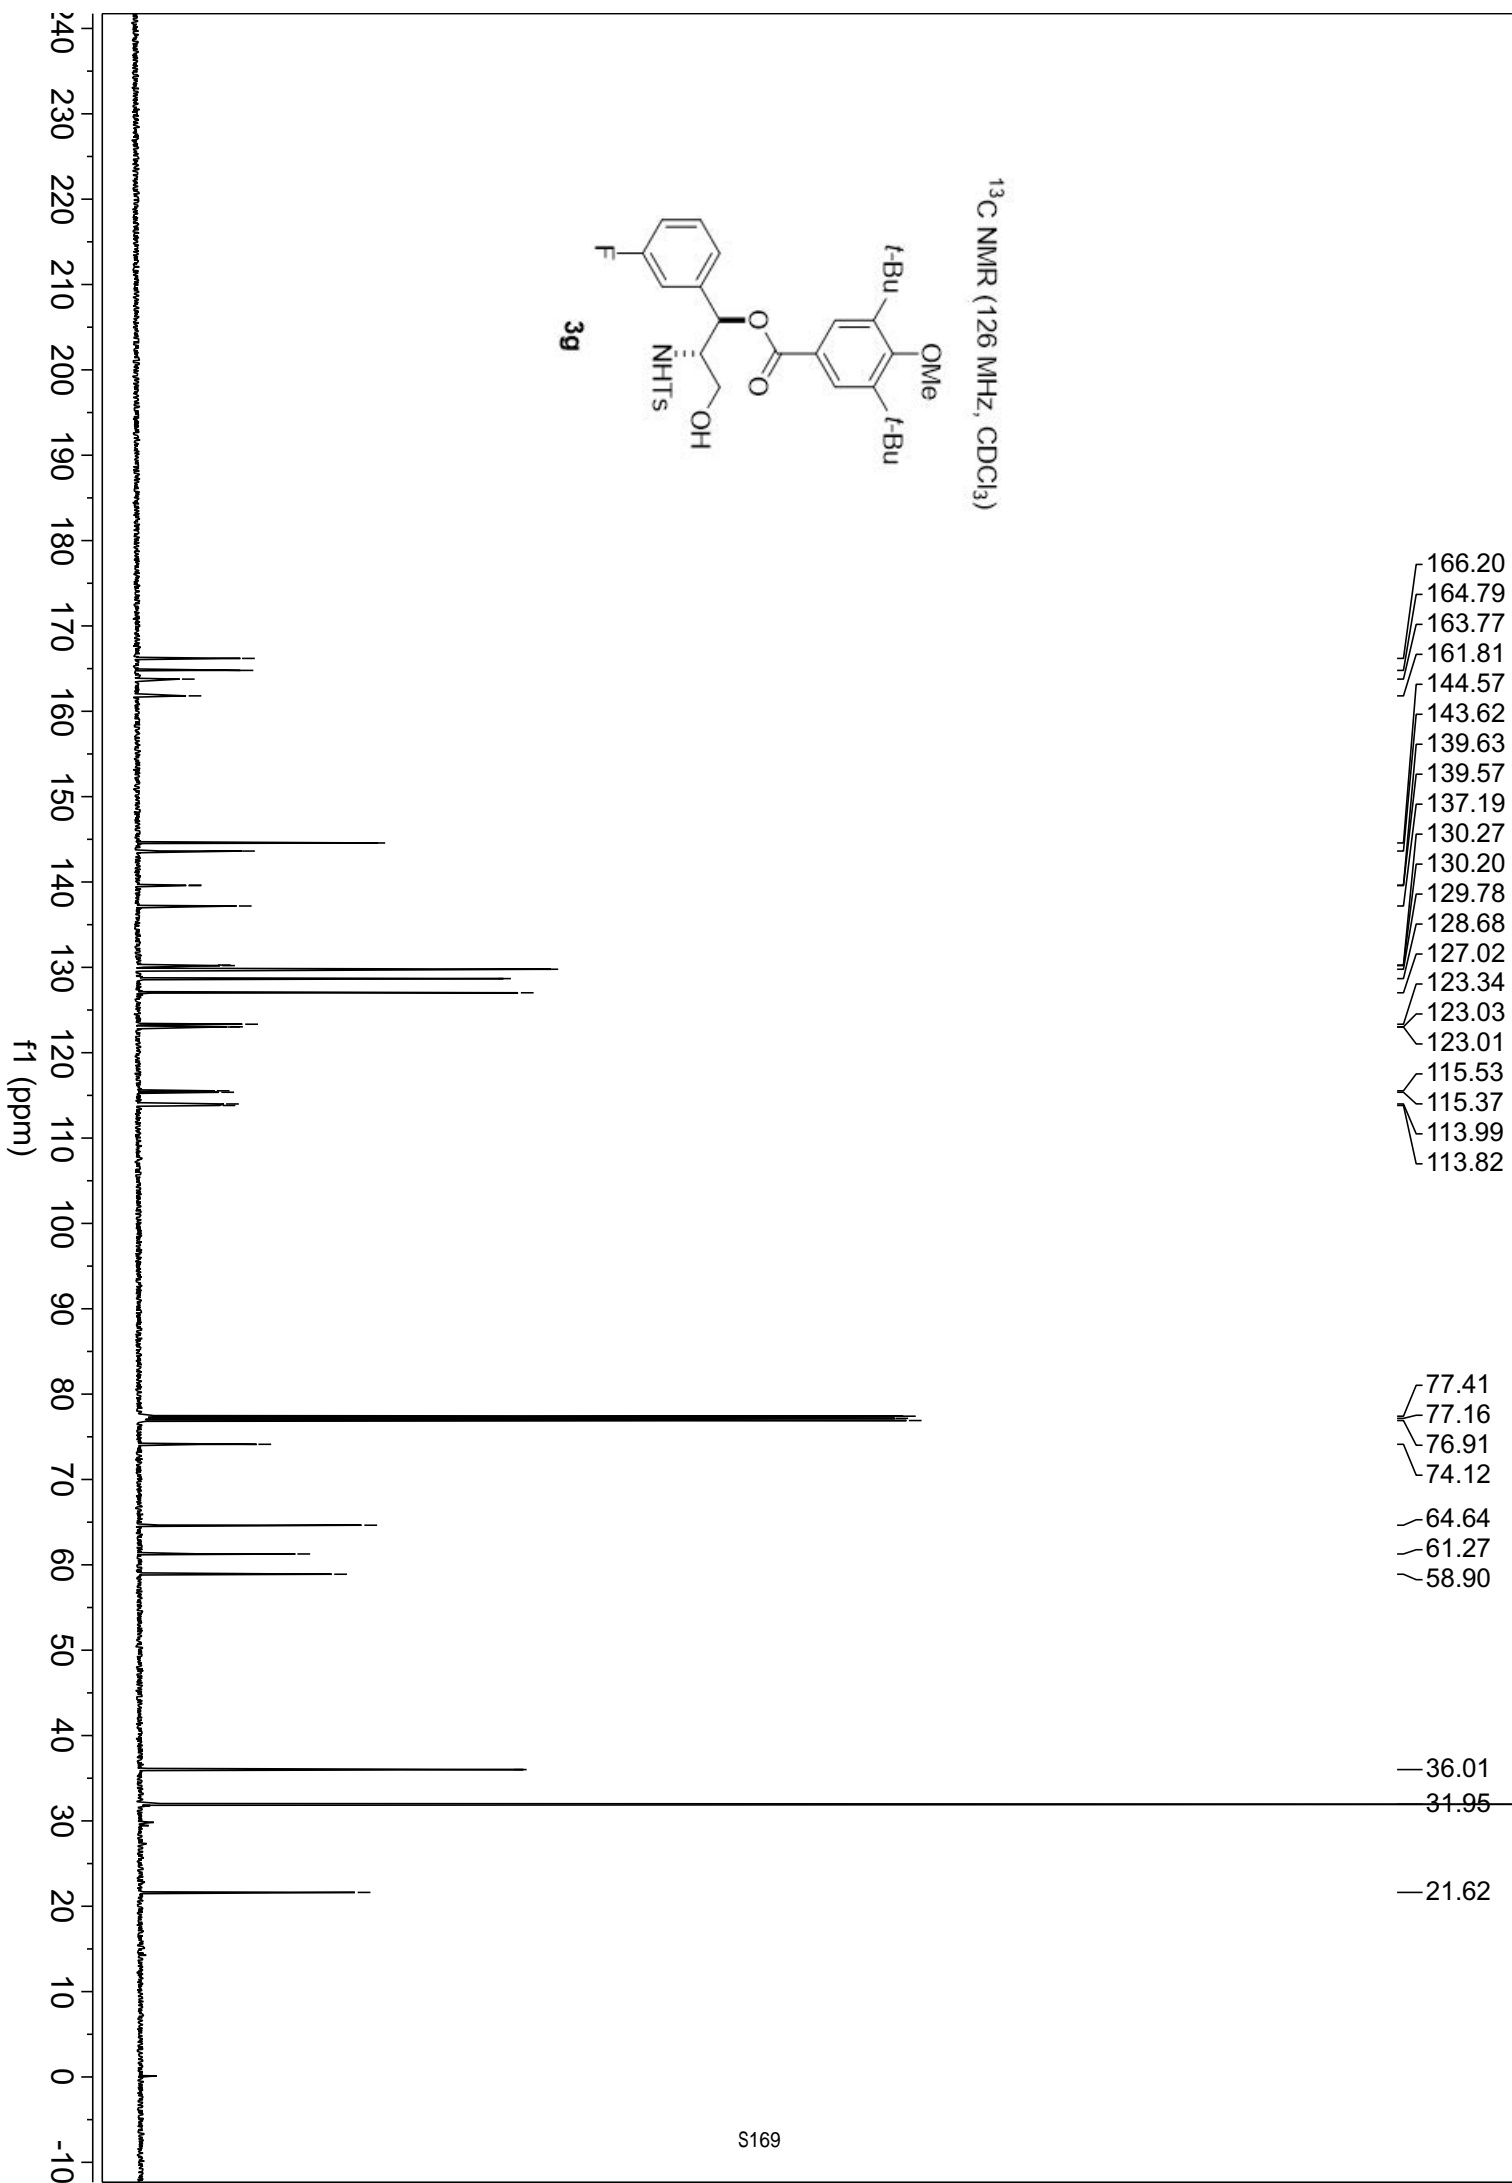

— -112.06

<sup>19</sup>F NMR (471 MHz, CDCl<sub>3</sub>)

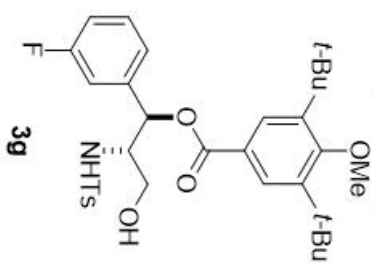

20 10 0 -10 -20 -30 -40 -50 -60 -70 -80 -90 -100 -110 -120 -130 -140 -150 -160 -170 -180 -190 -200 -210 -22

f1 (ppm)

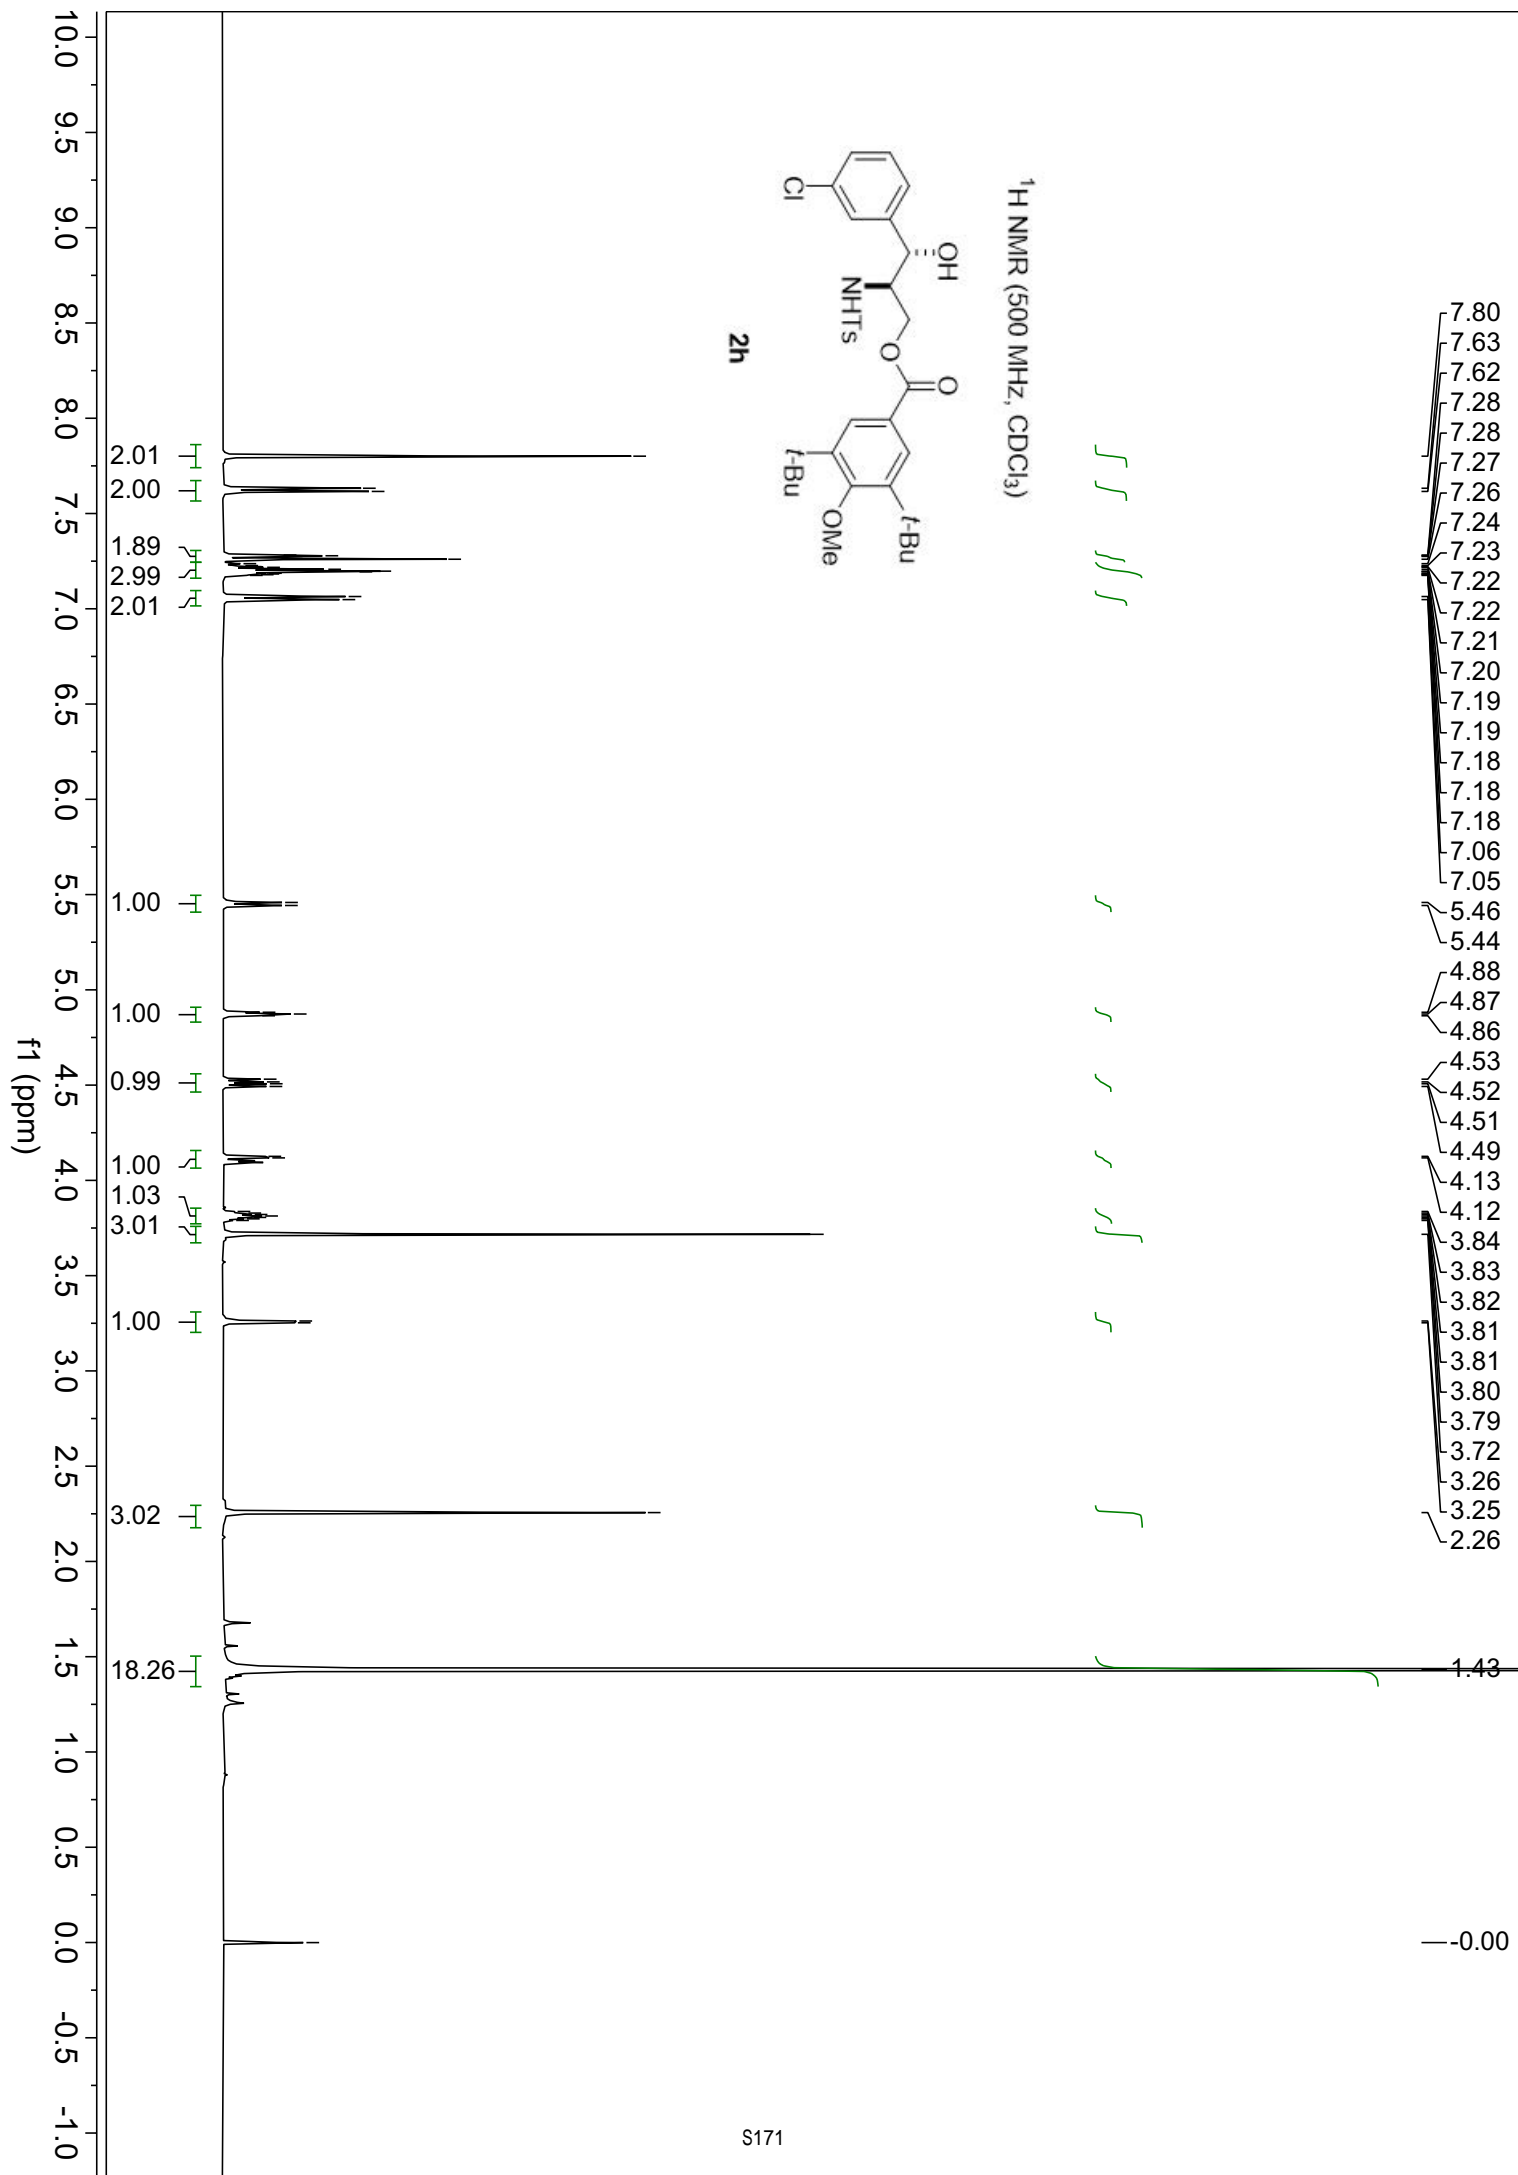

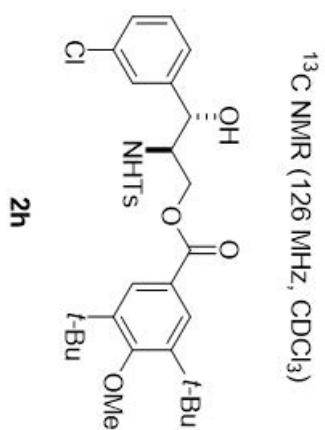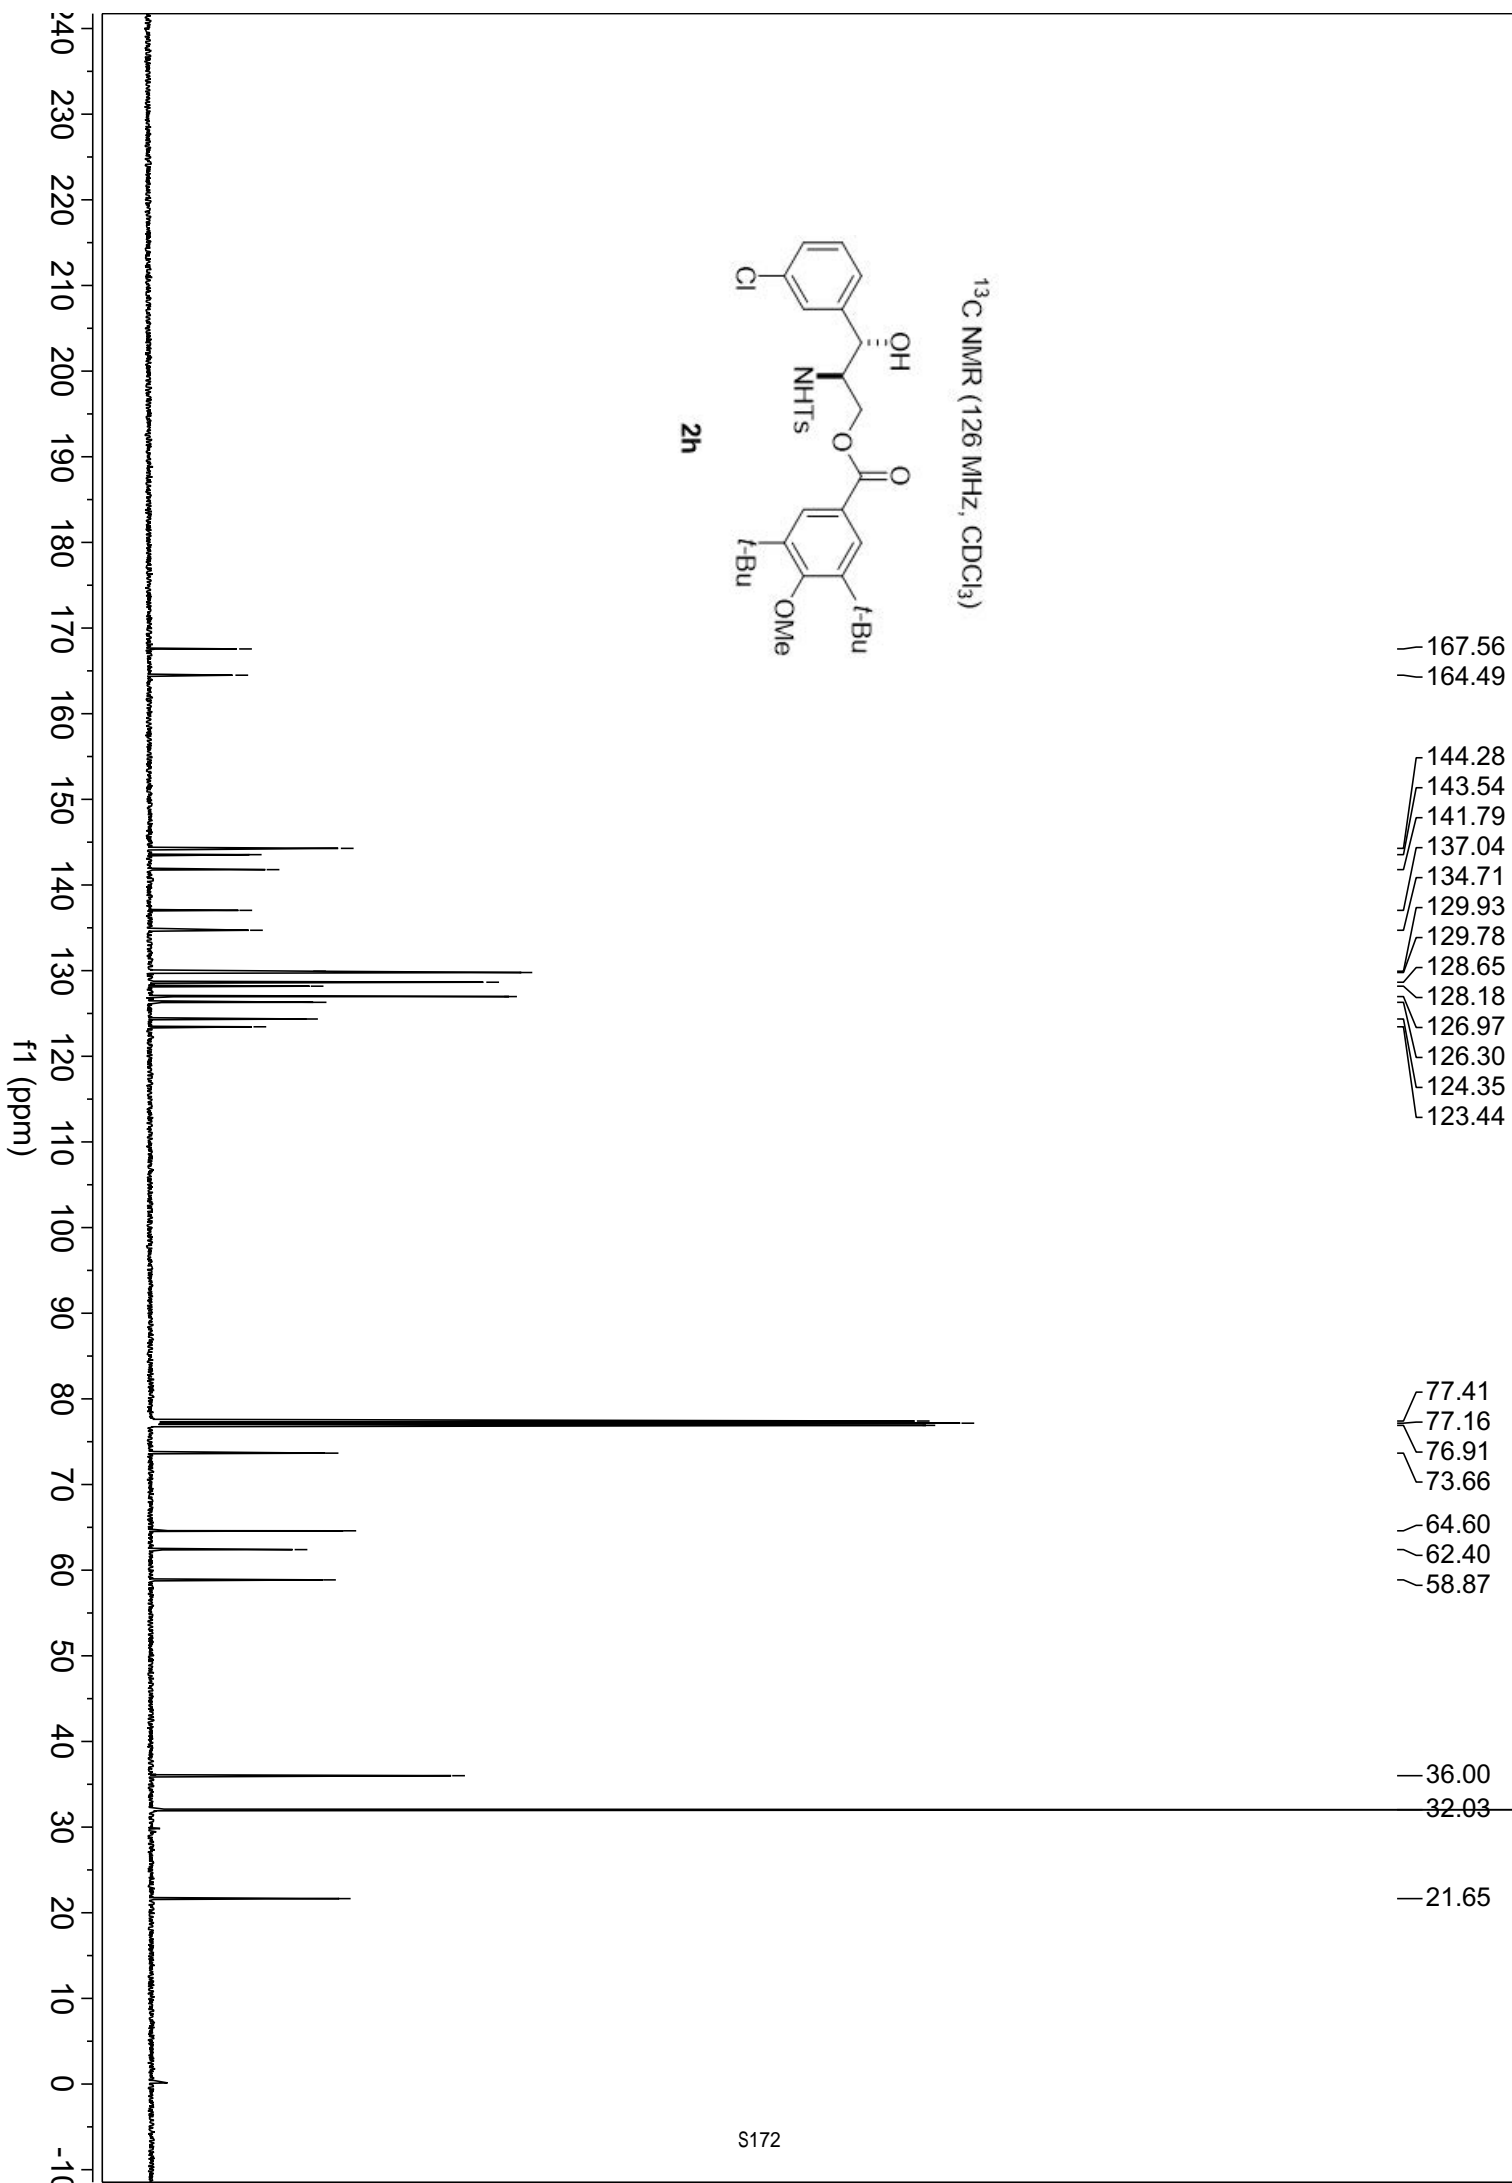

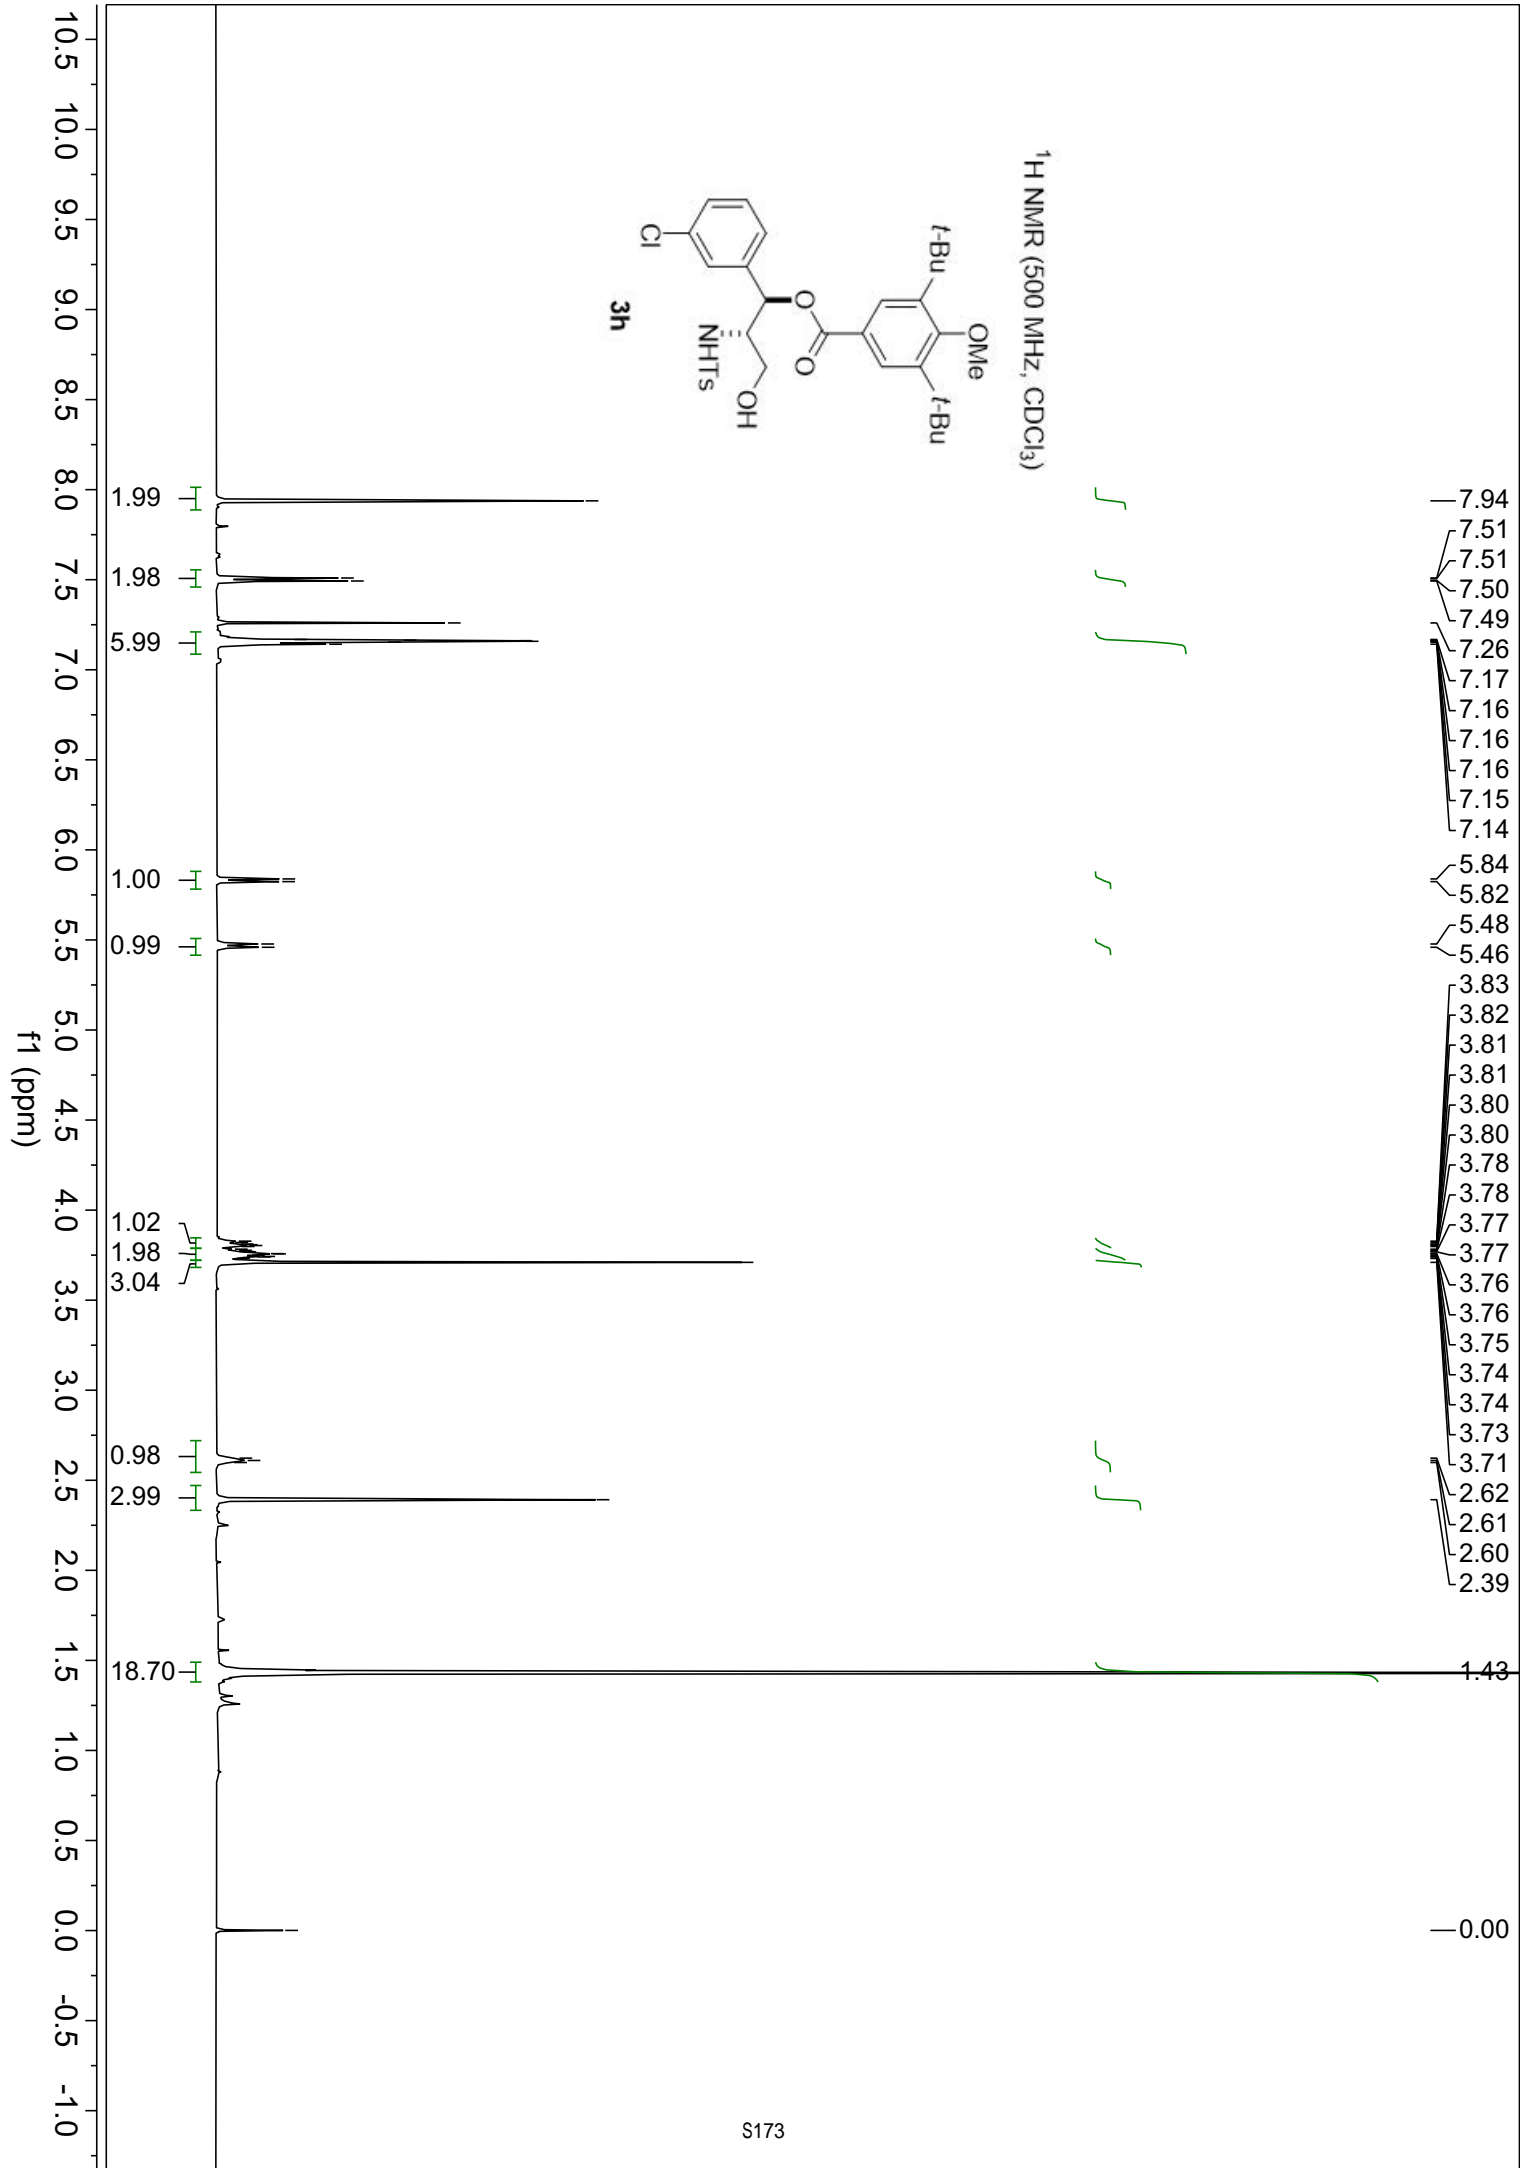

<sup>13</sup>C NMR (126 MHz, CDCl<sub>3</sub>)

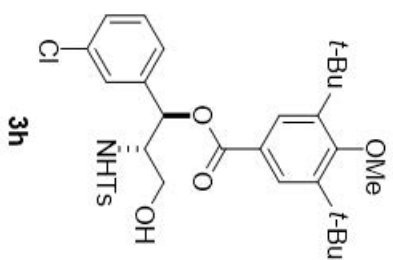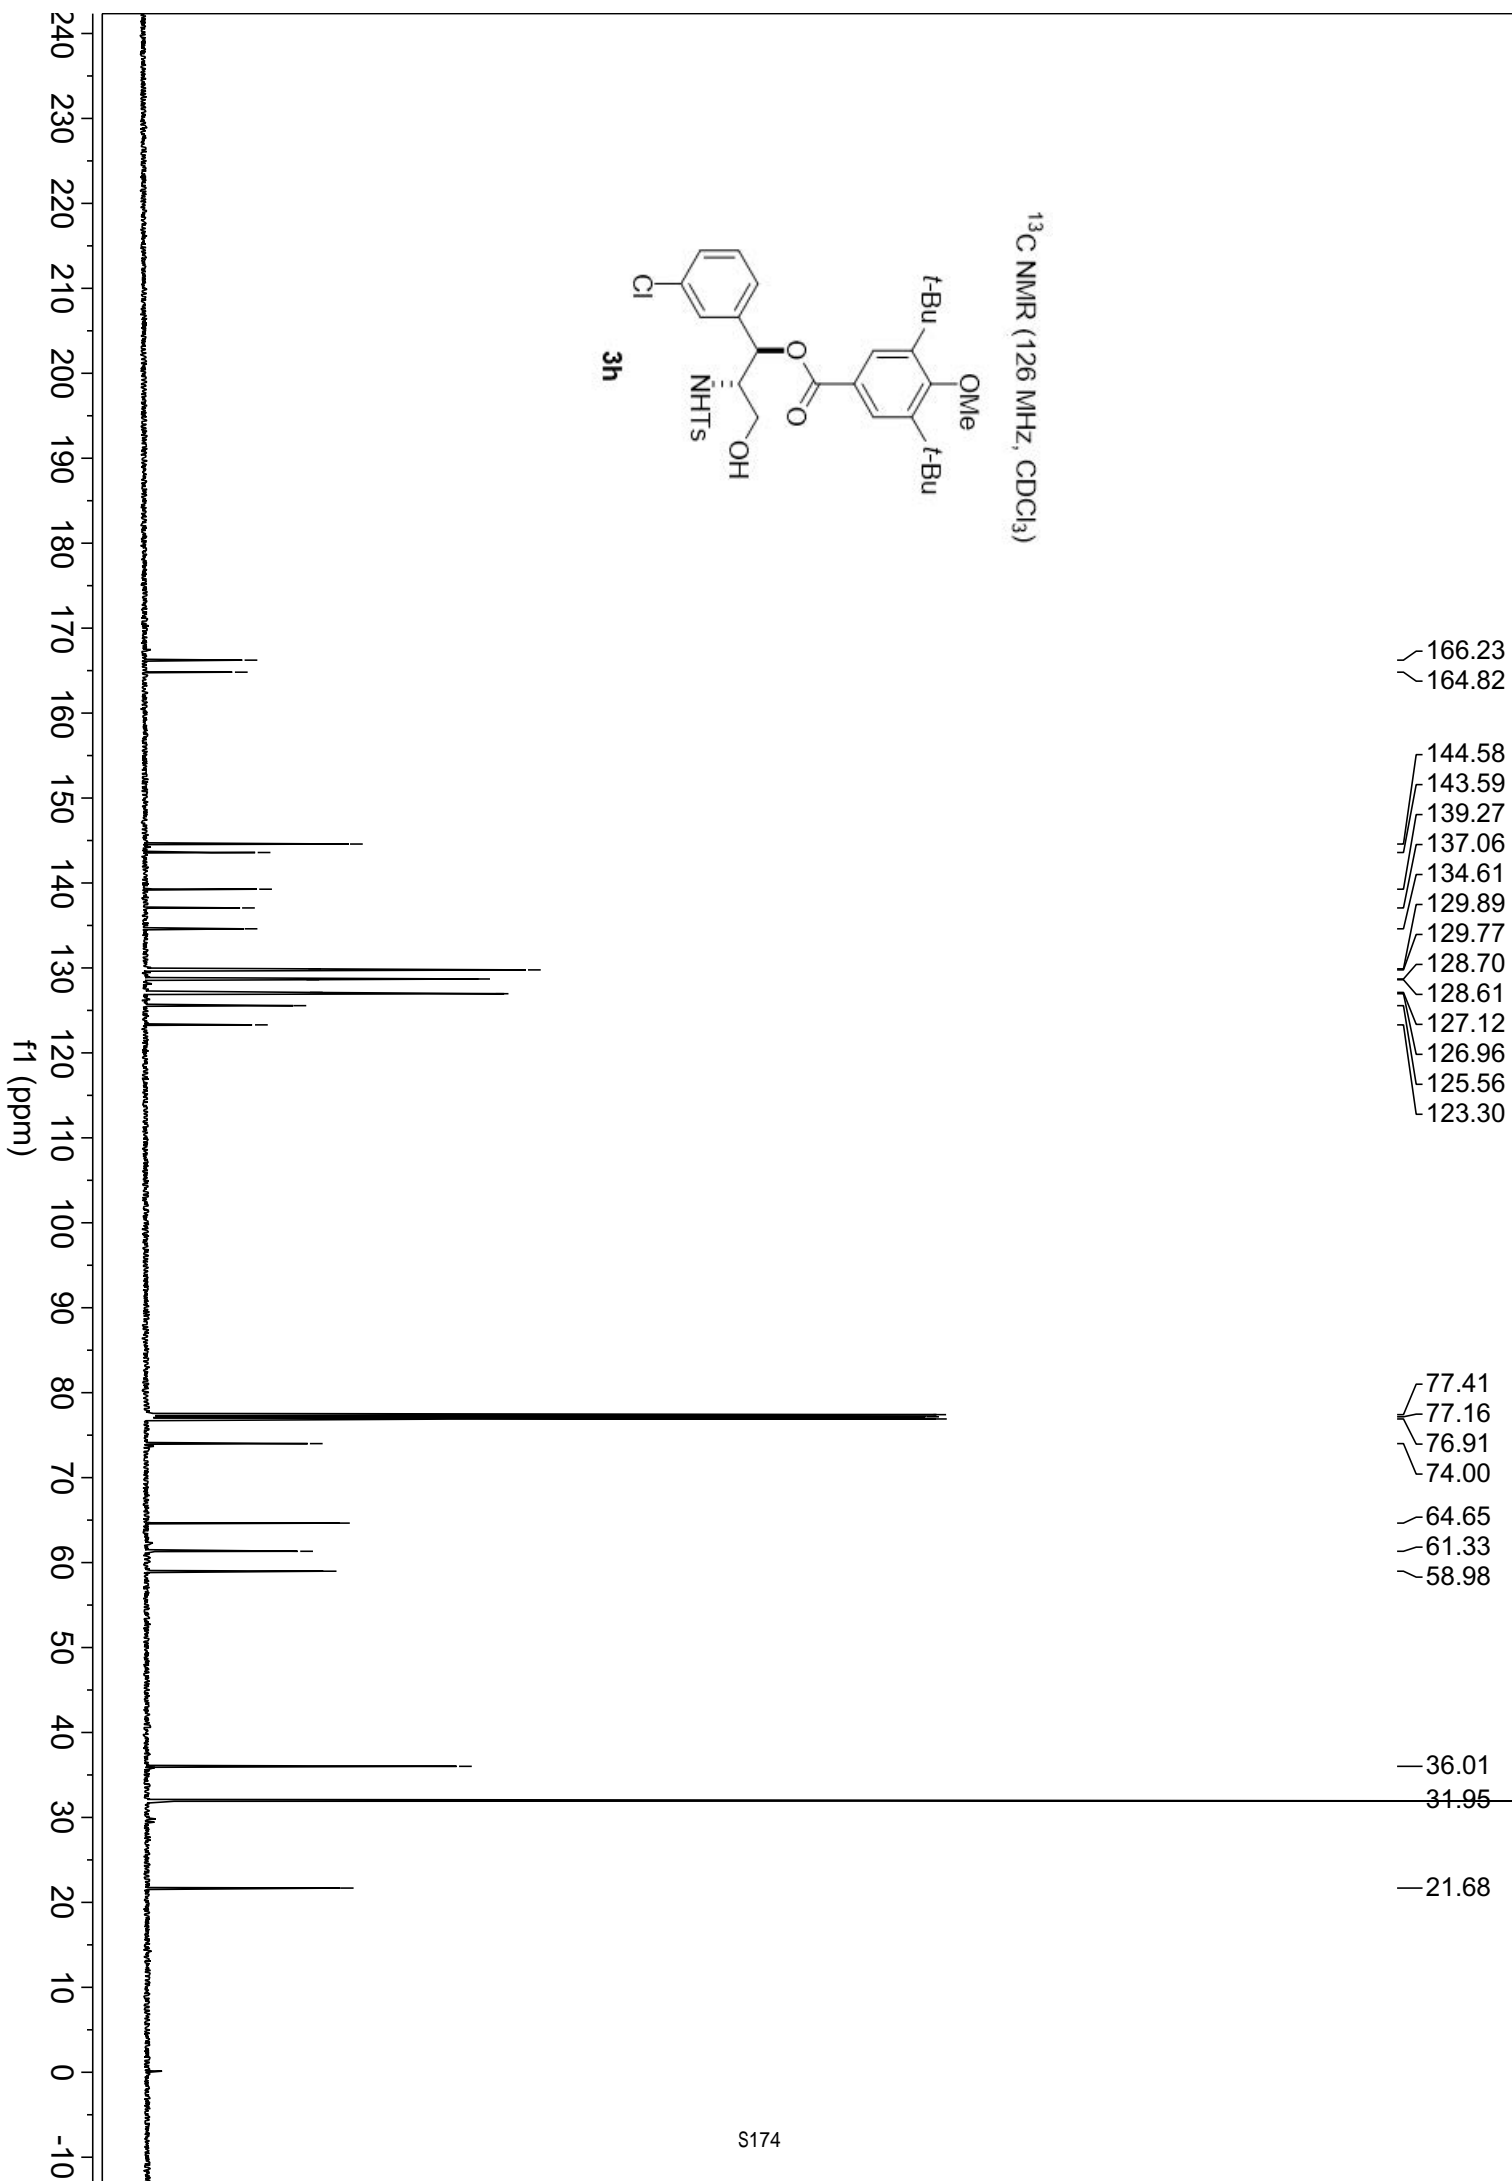

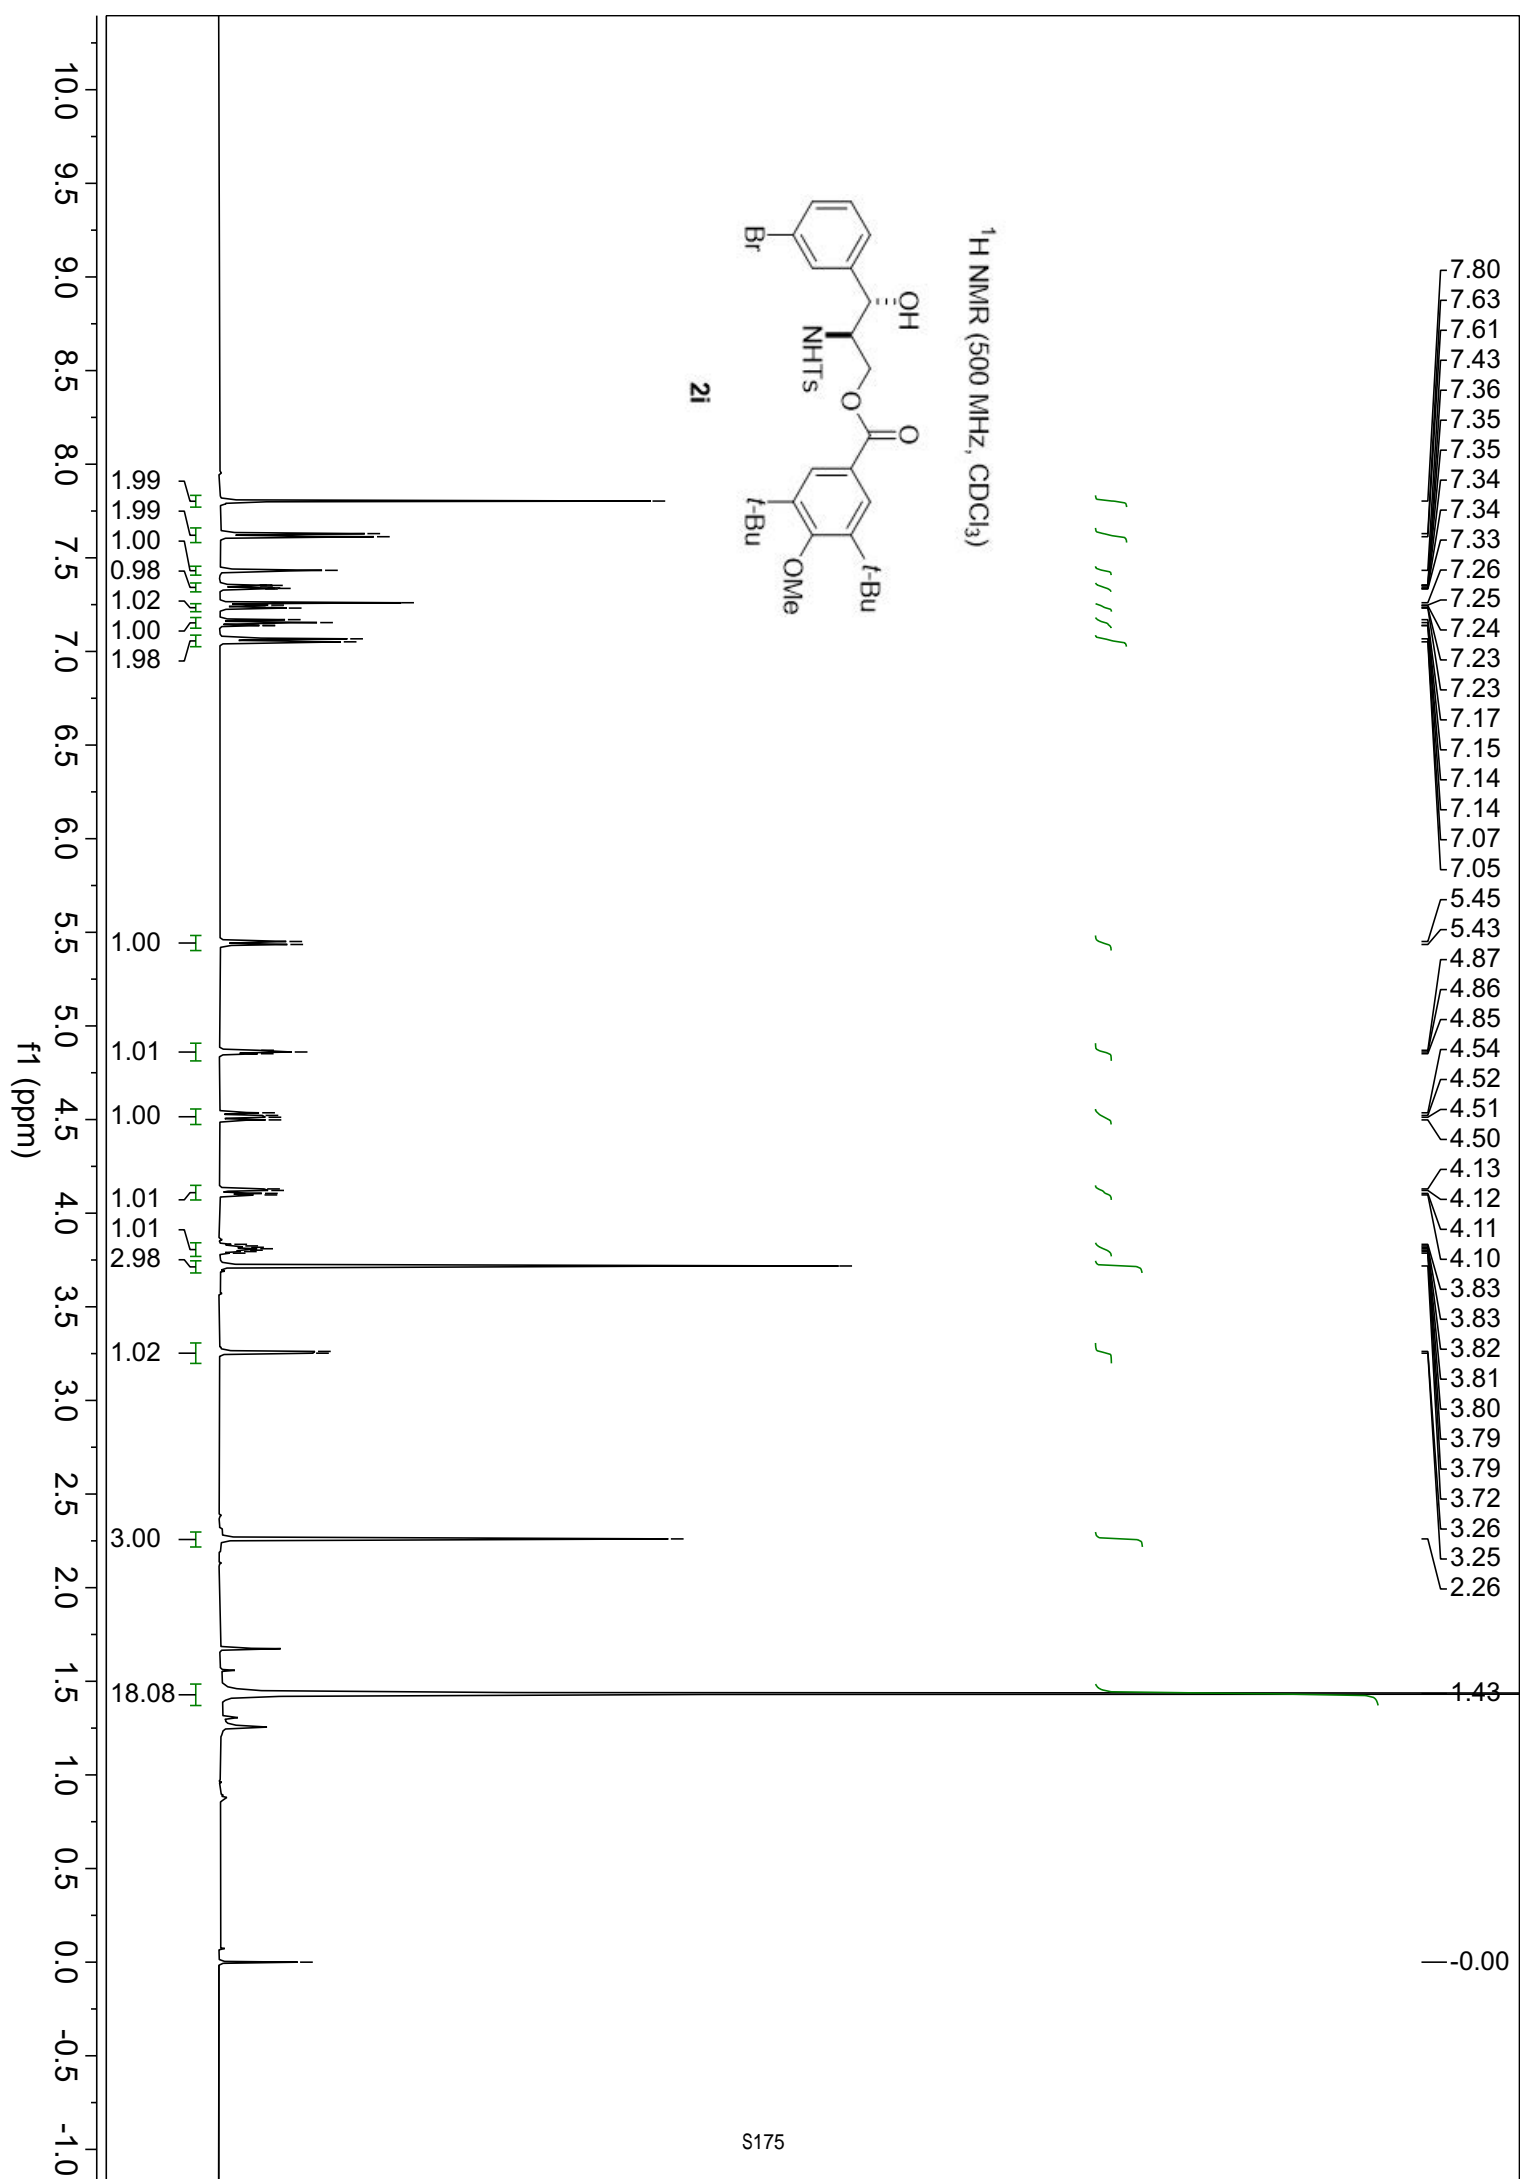

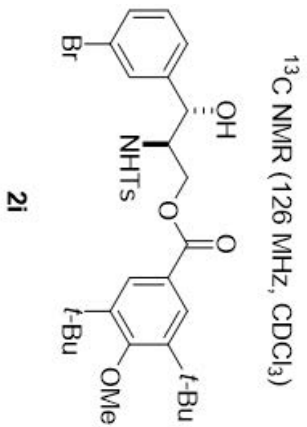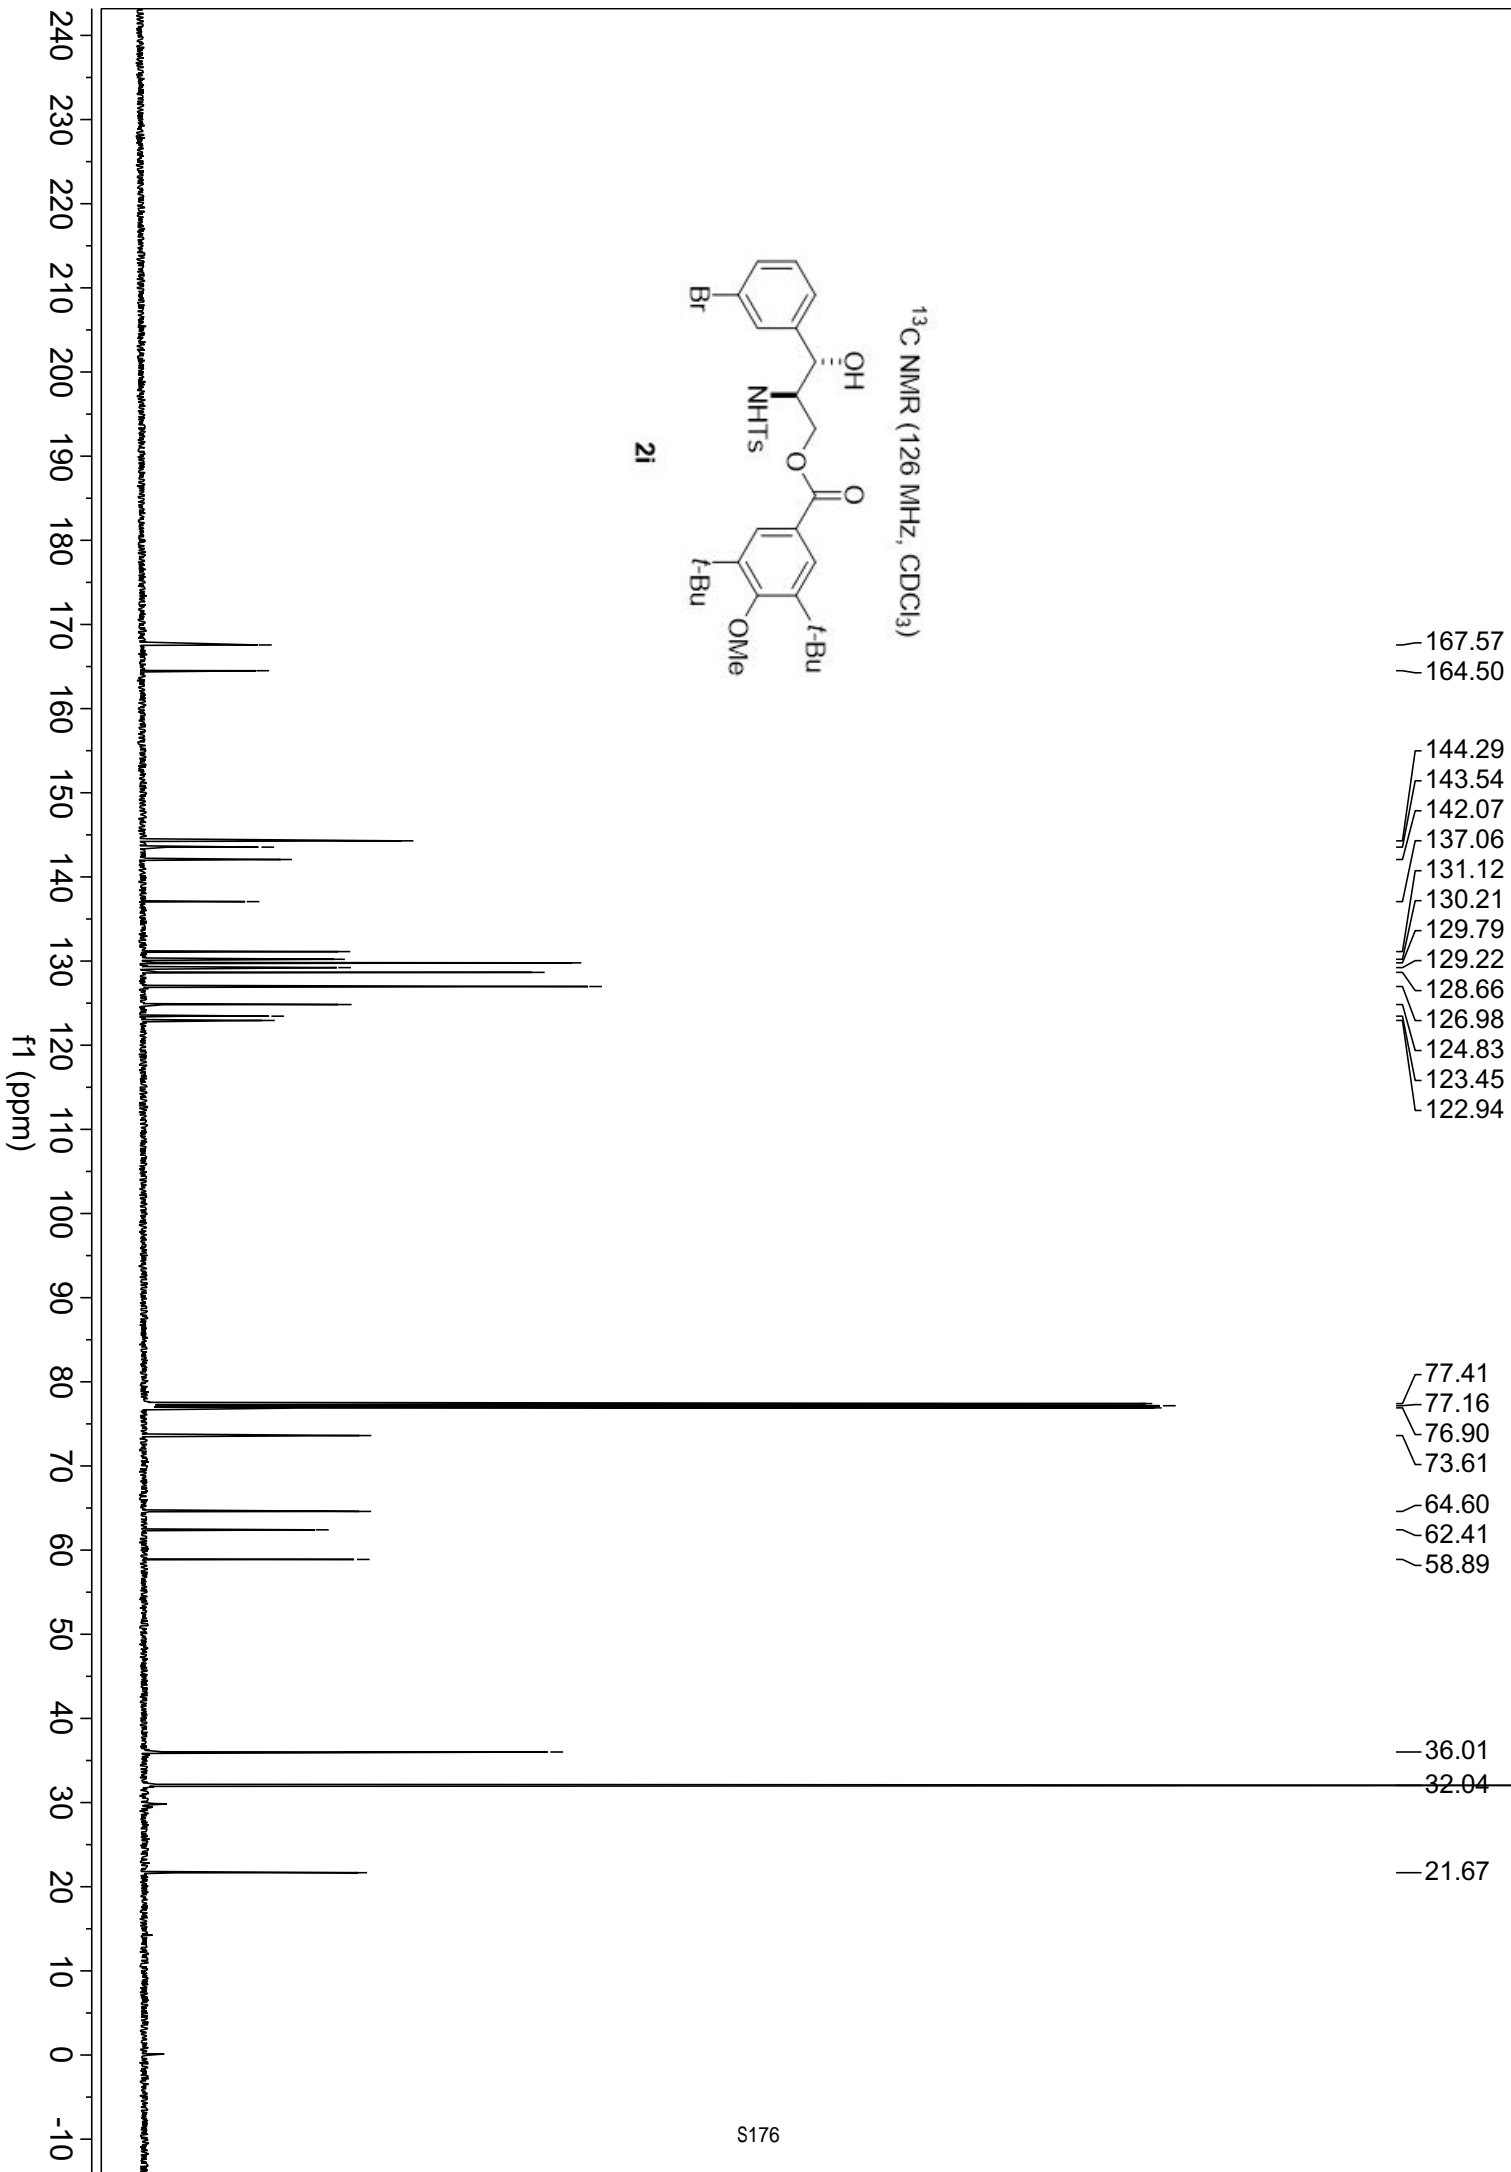



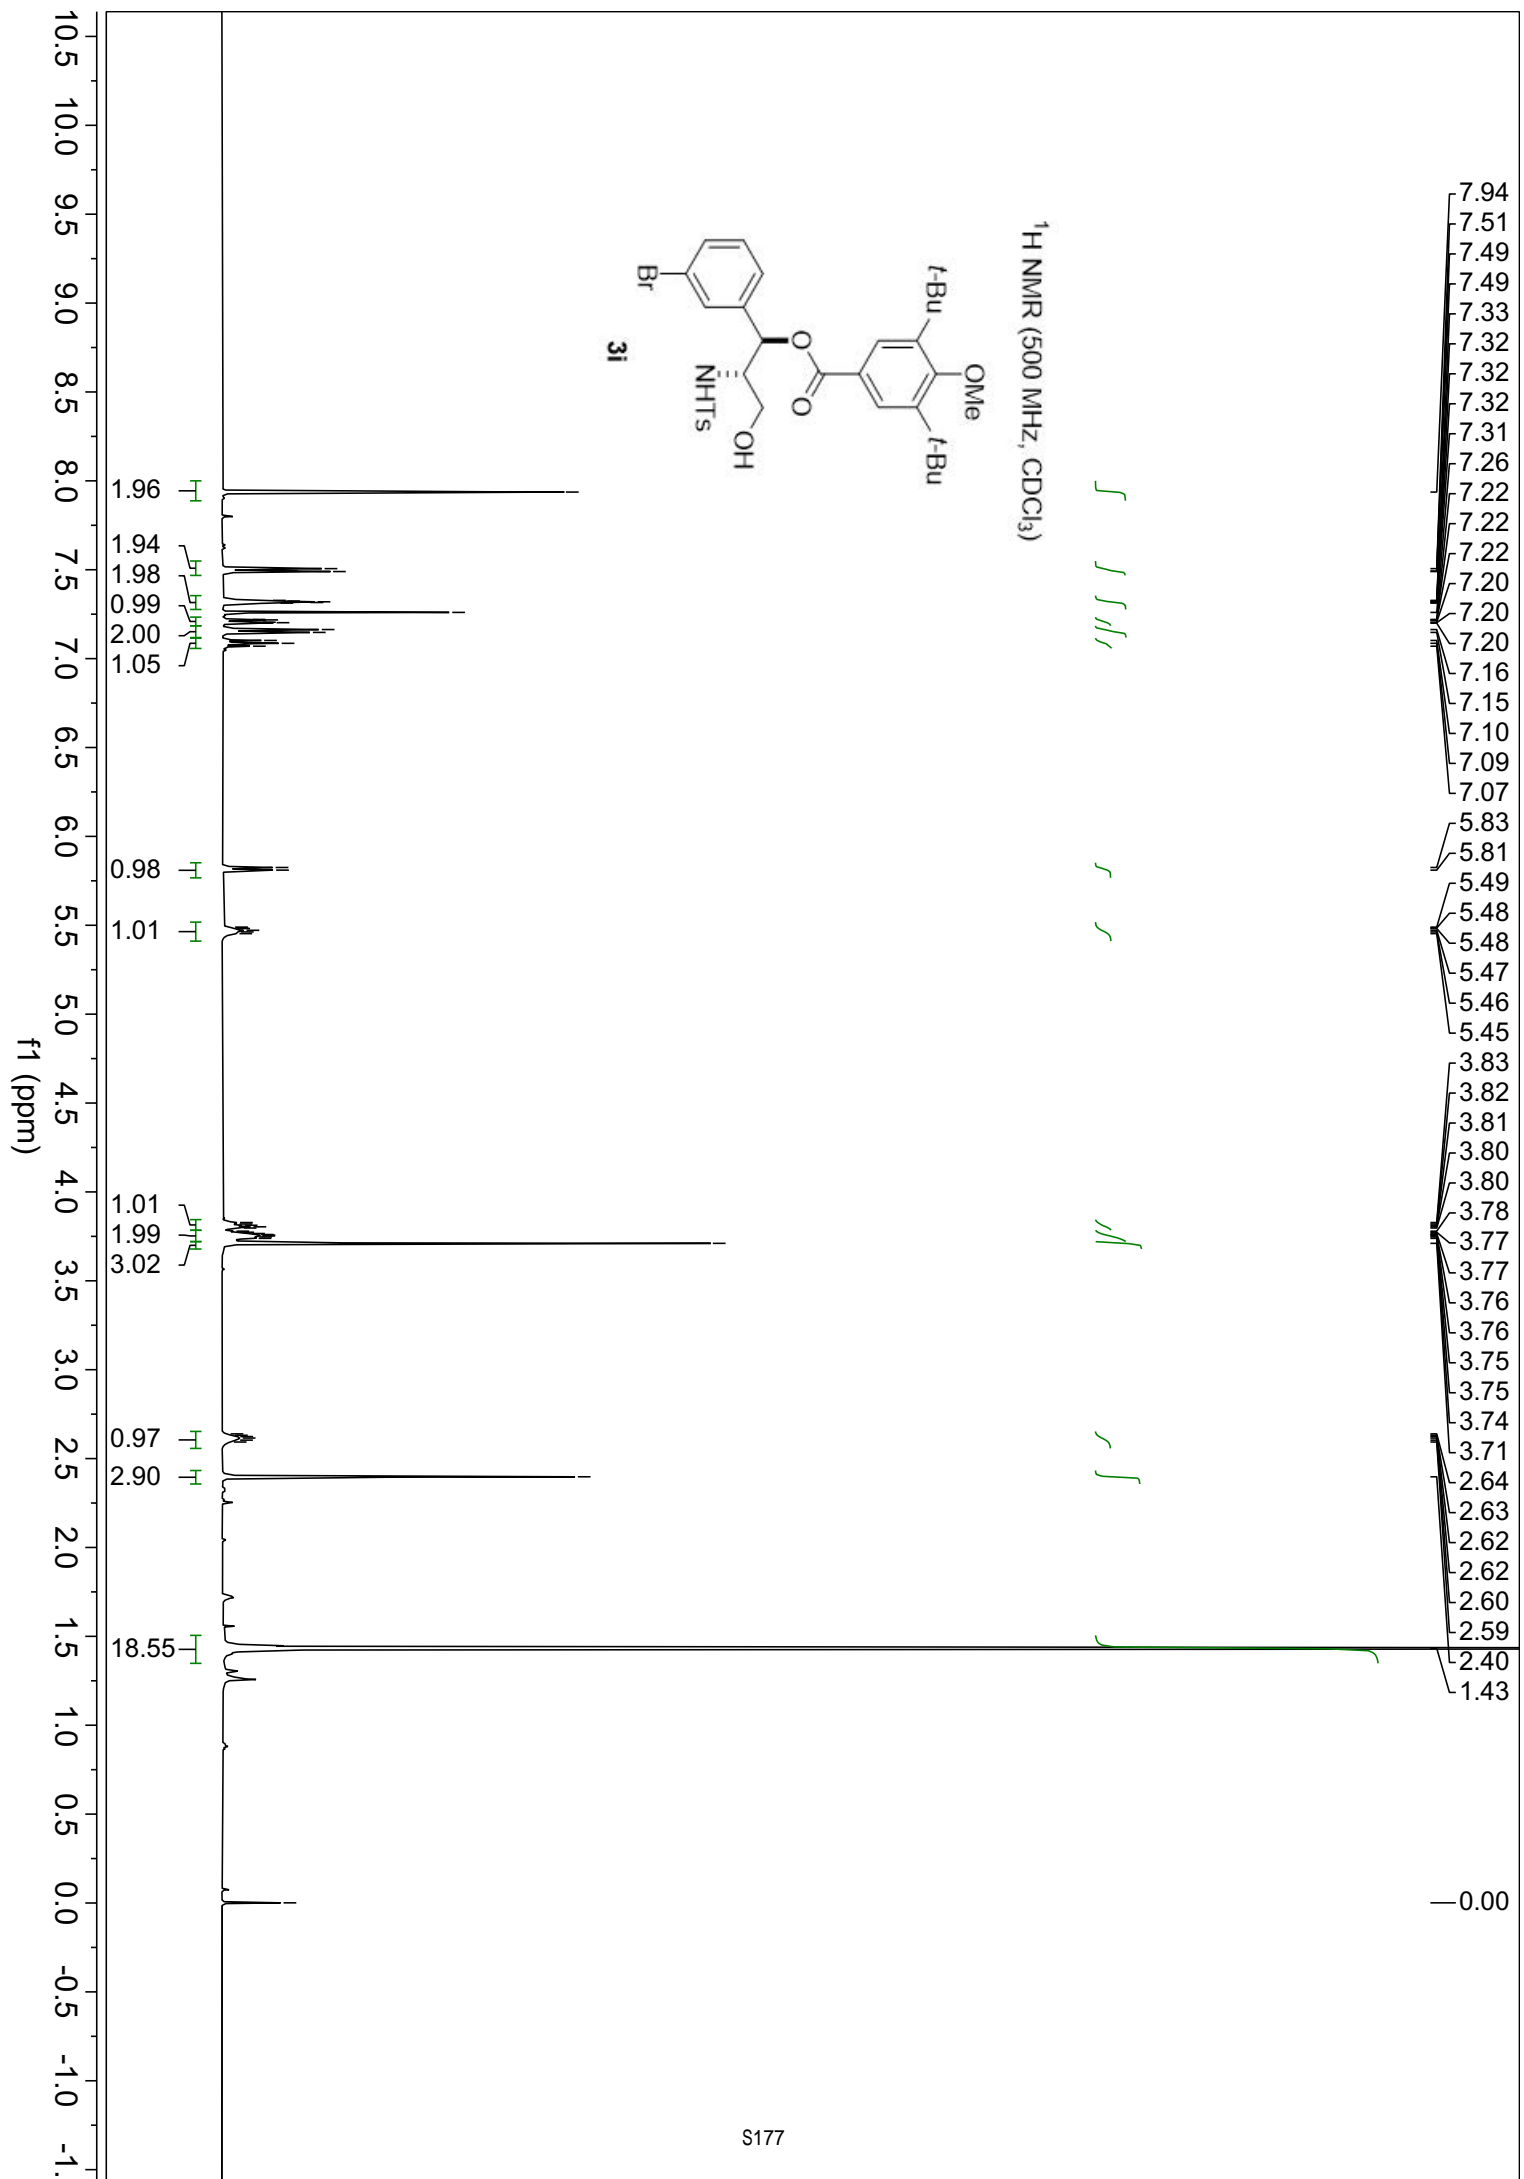

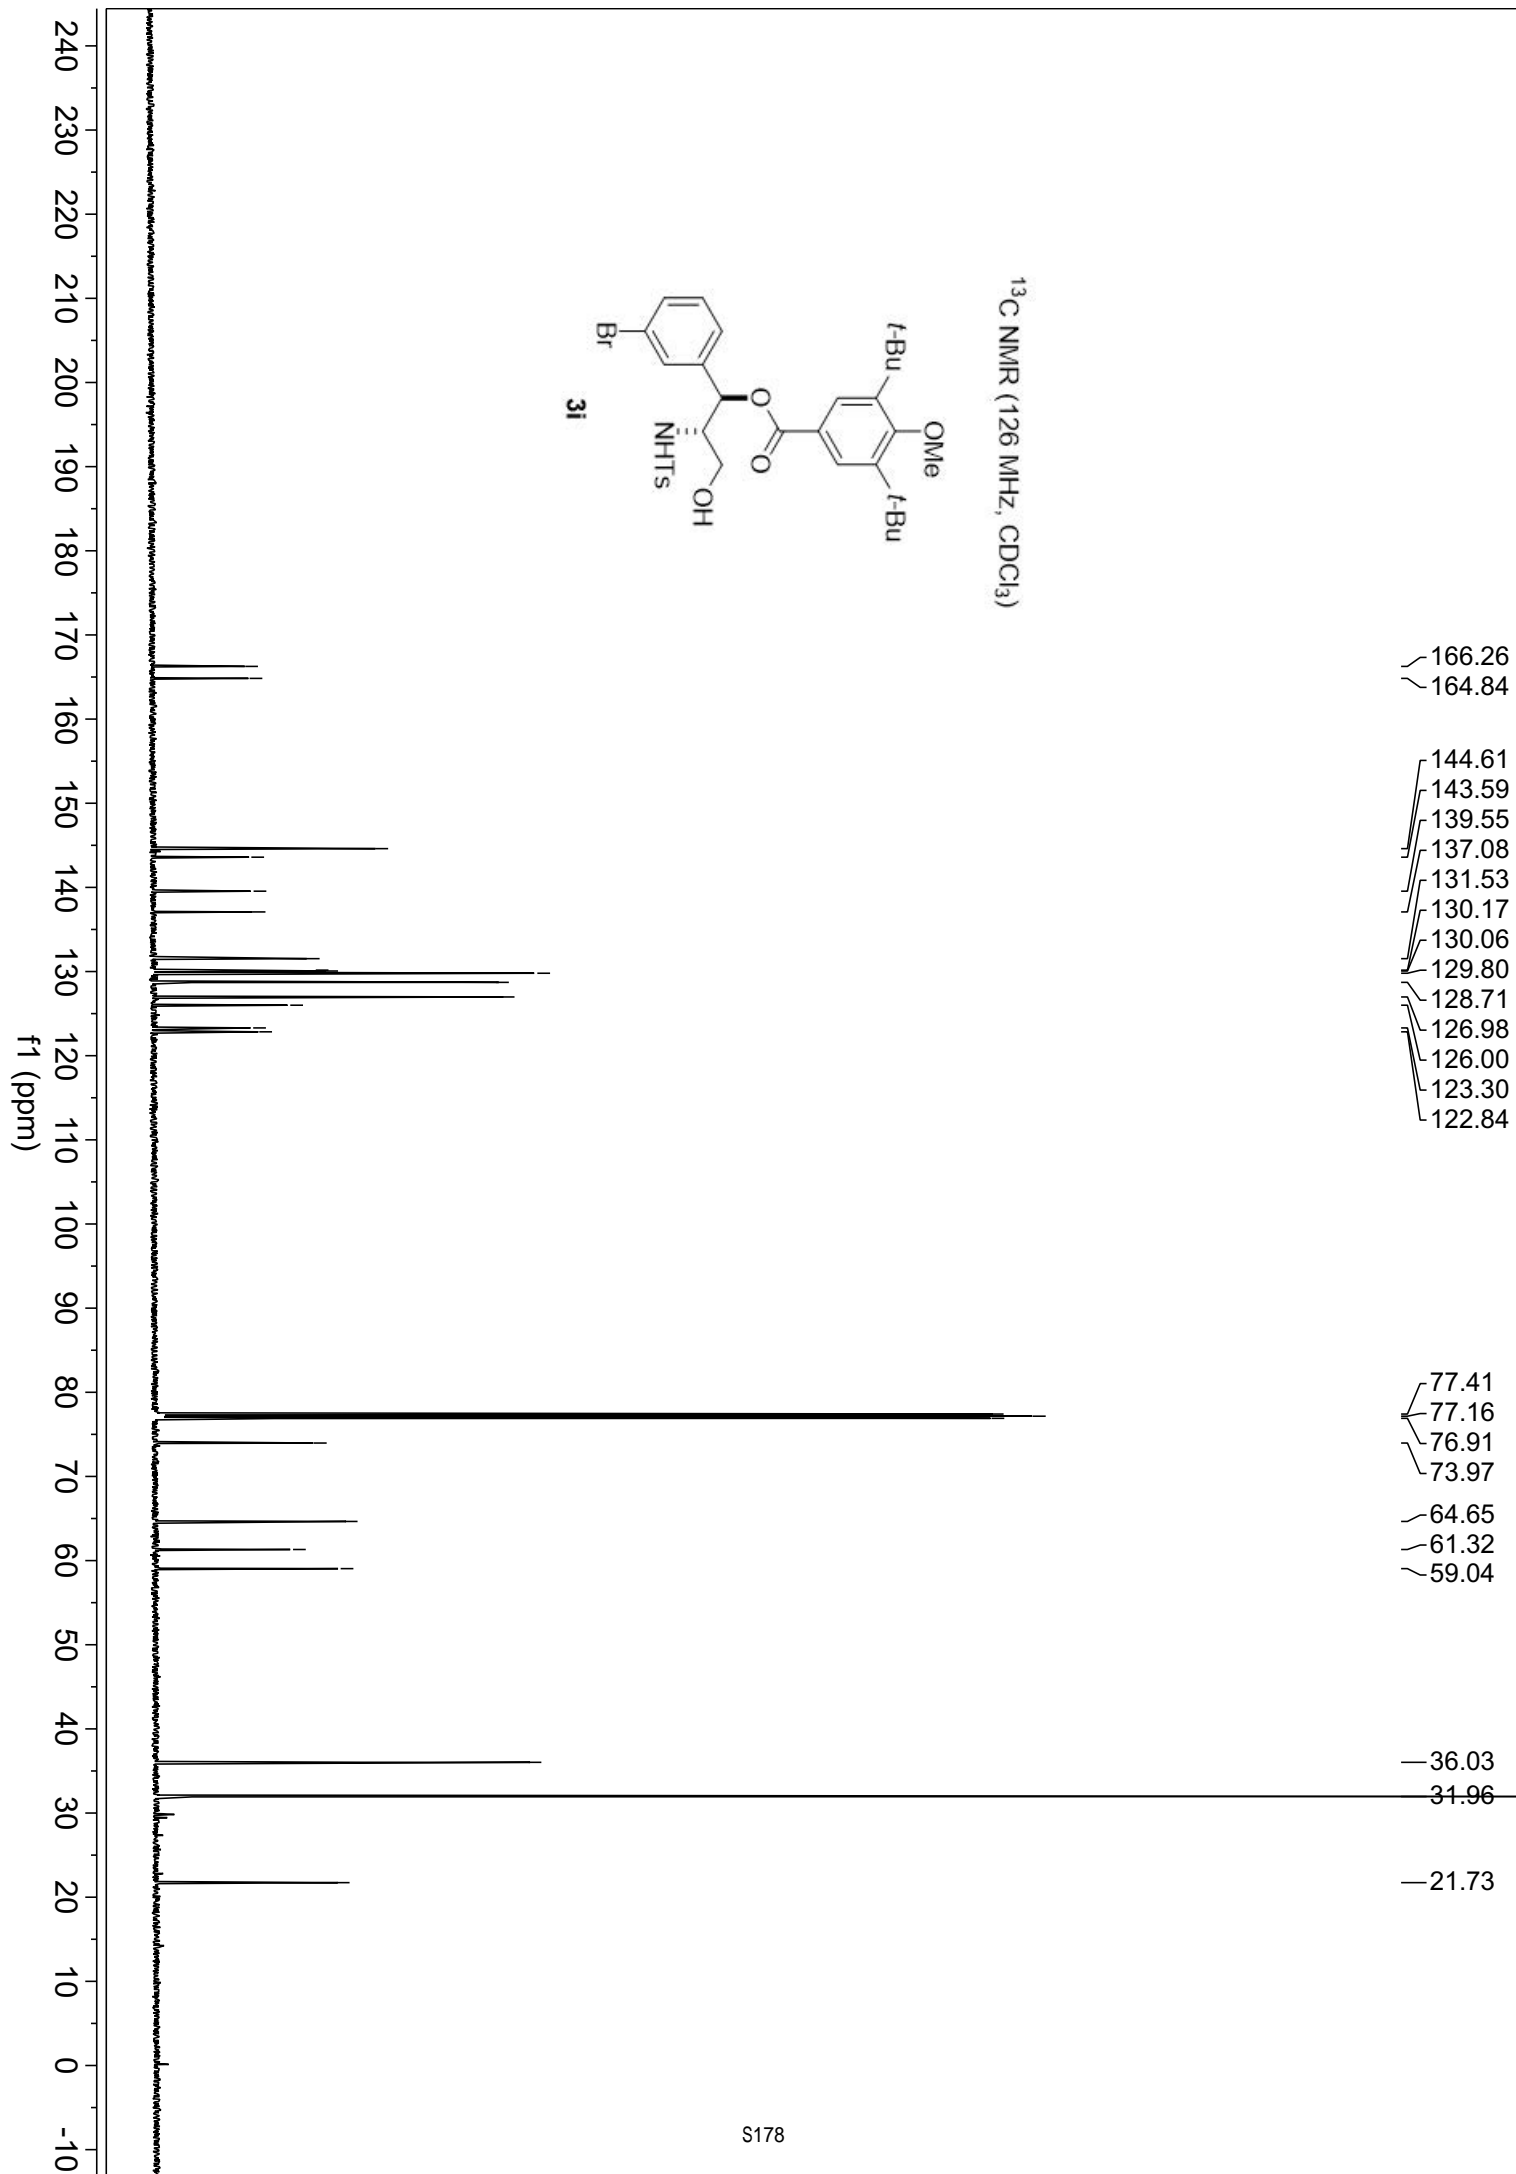

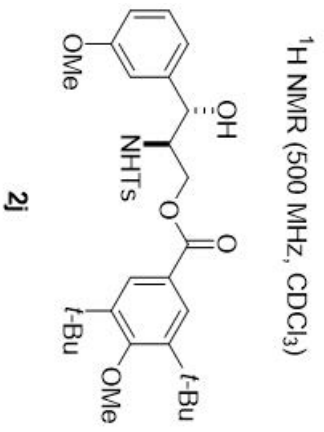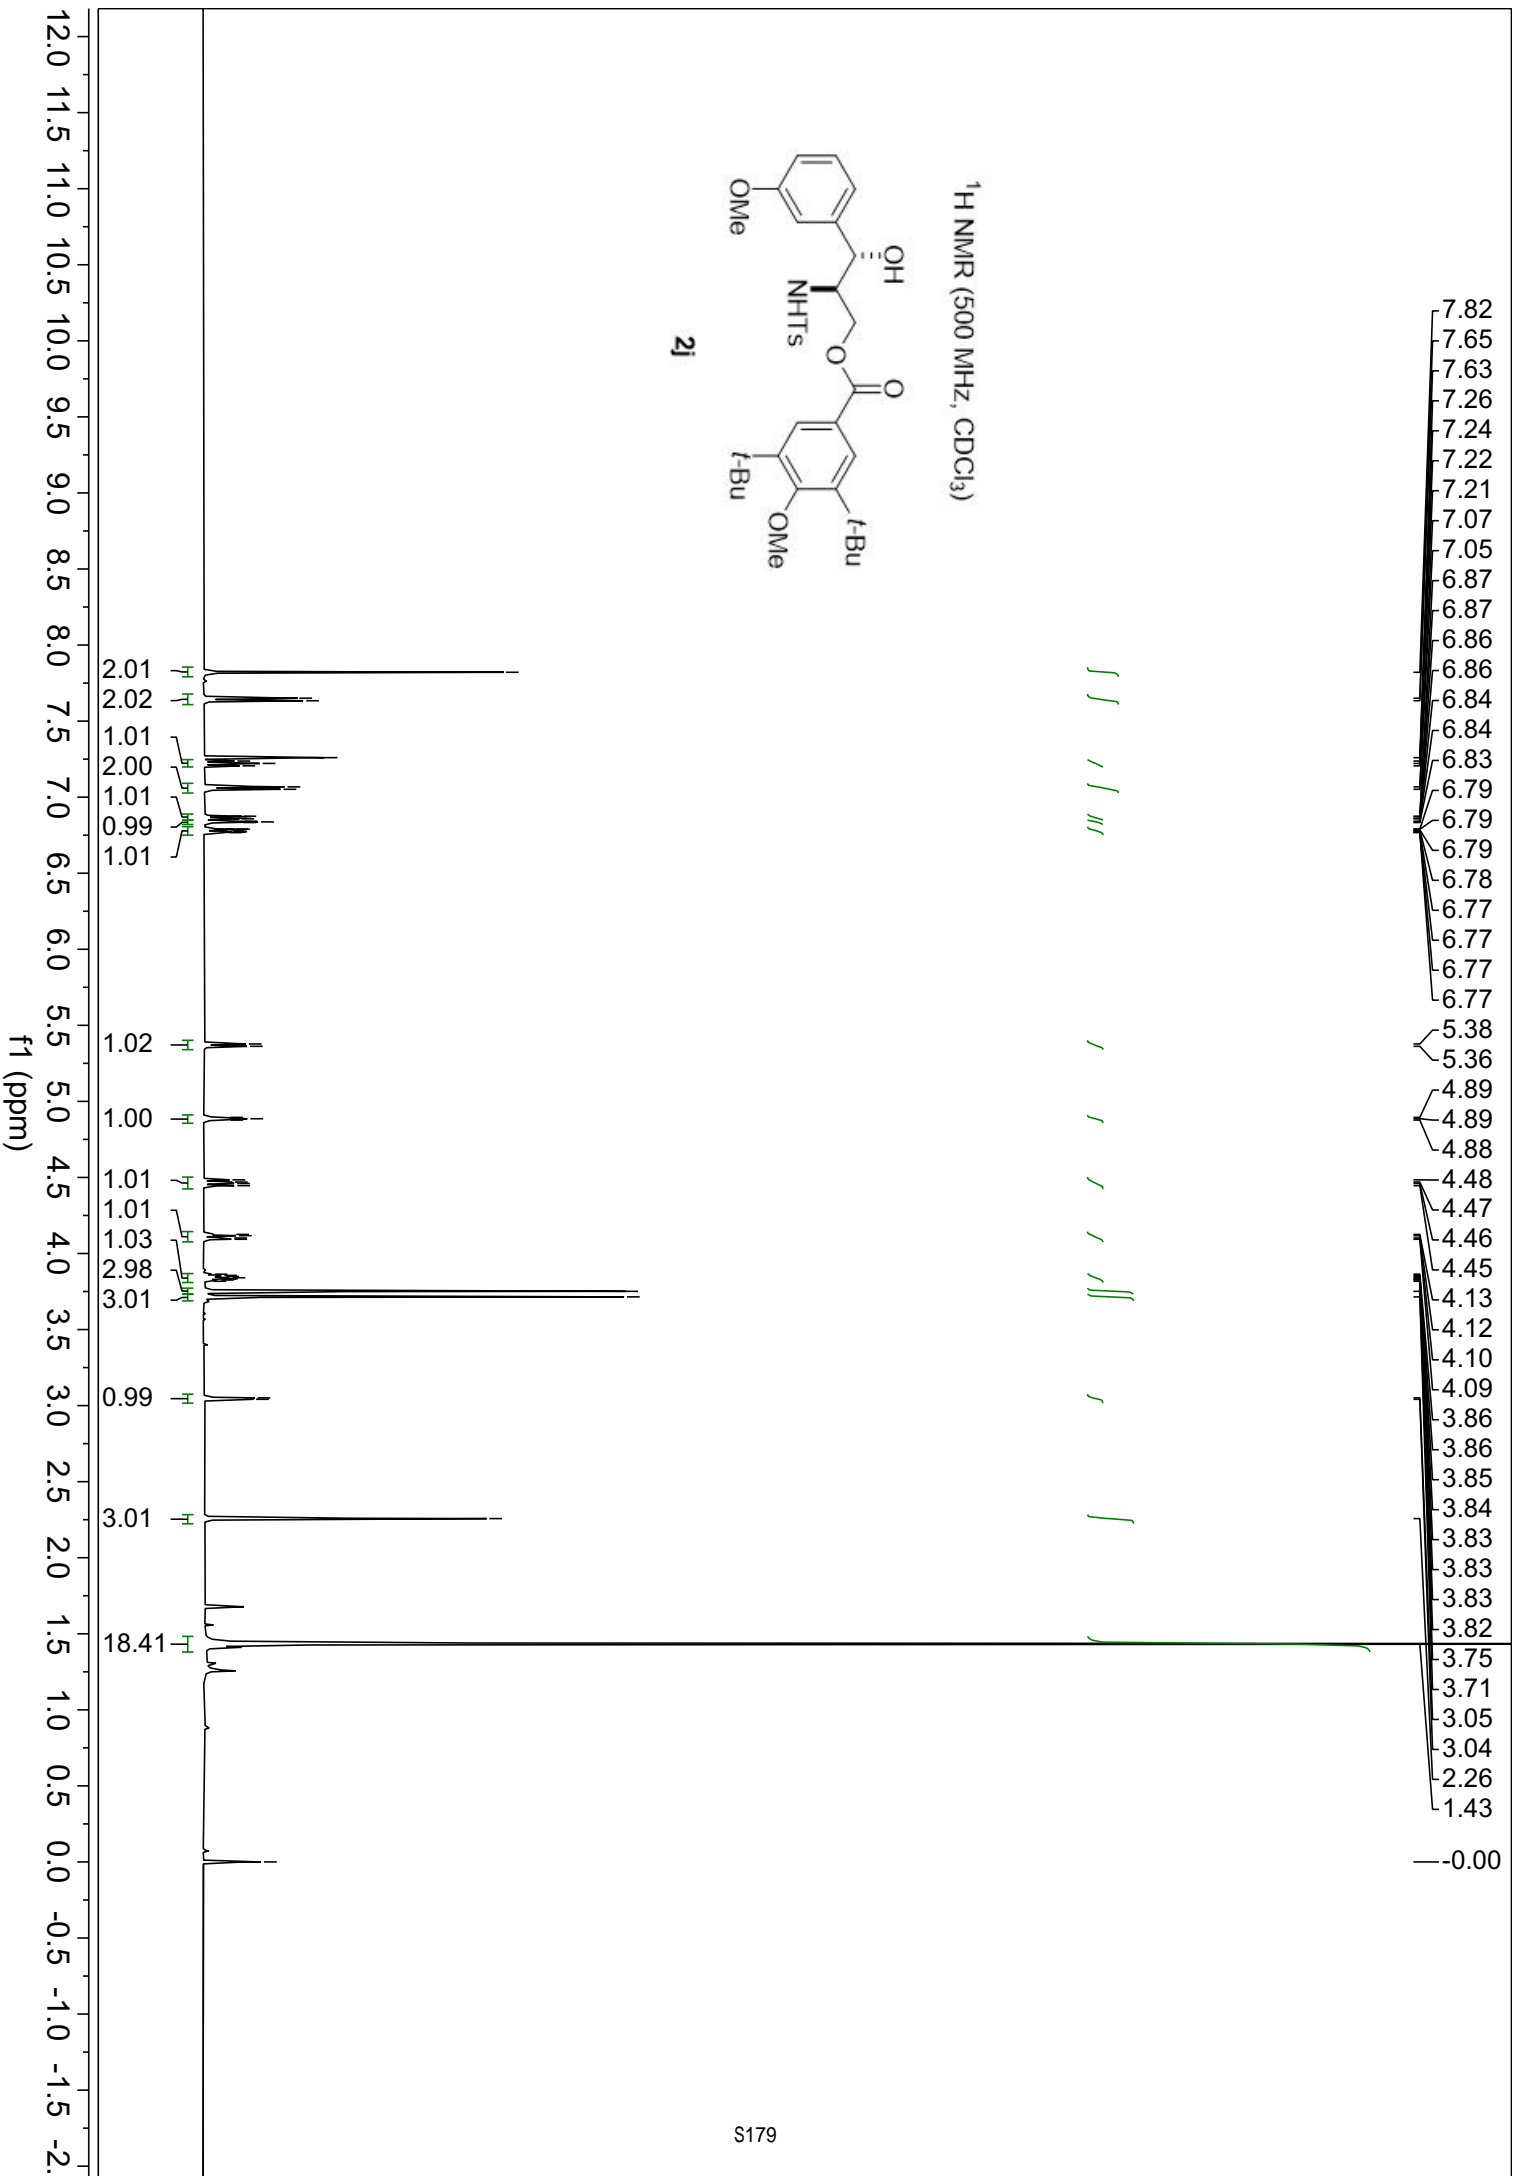

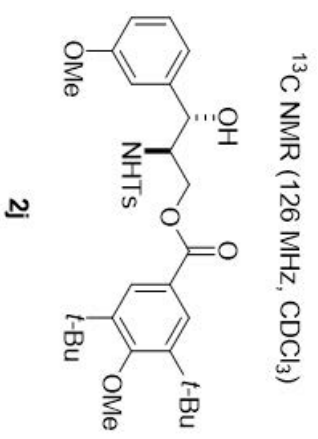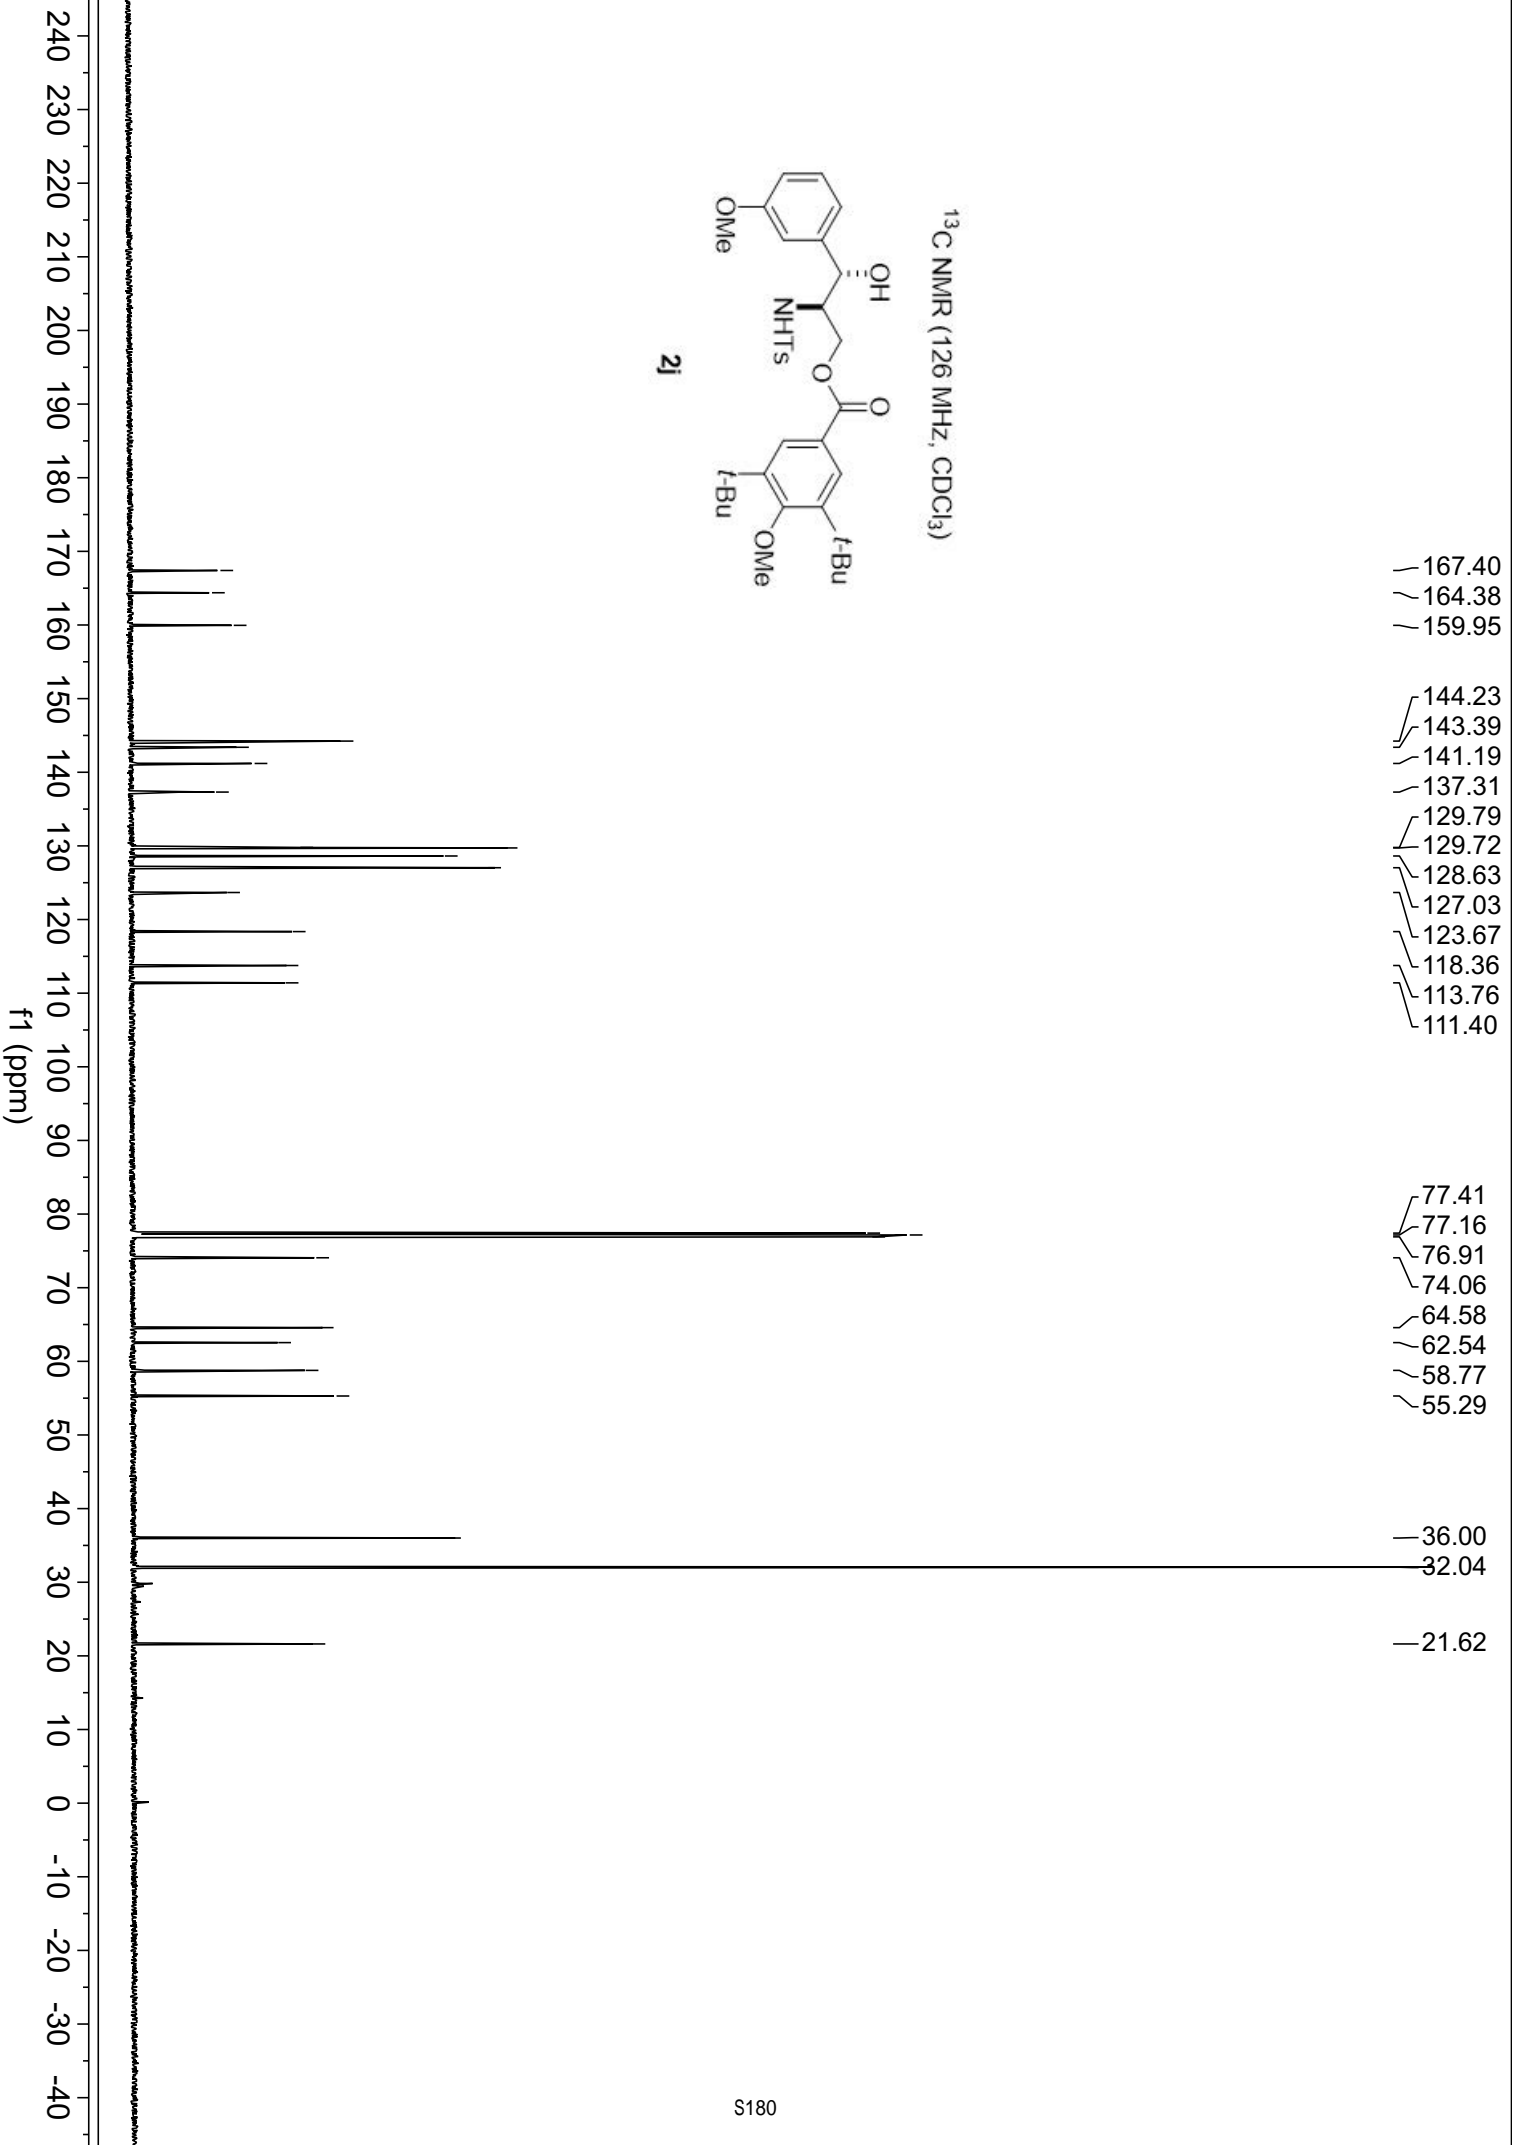

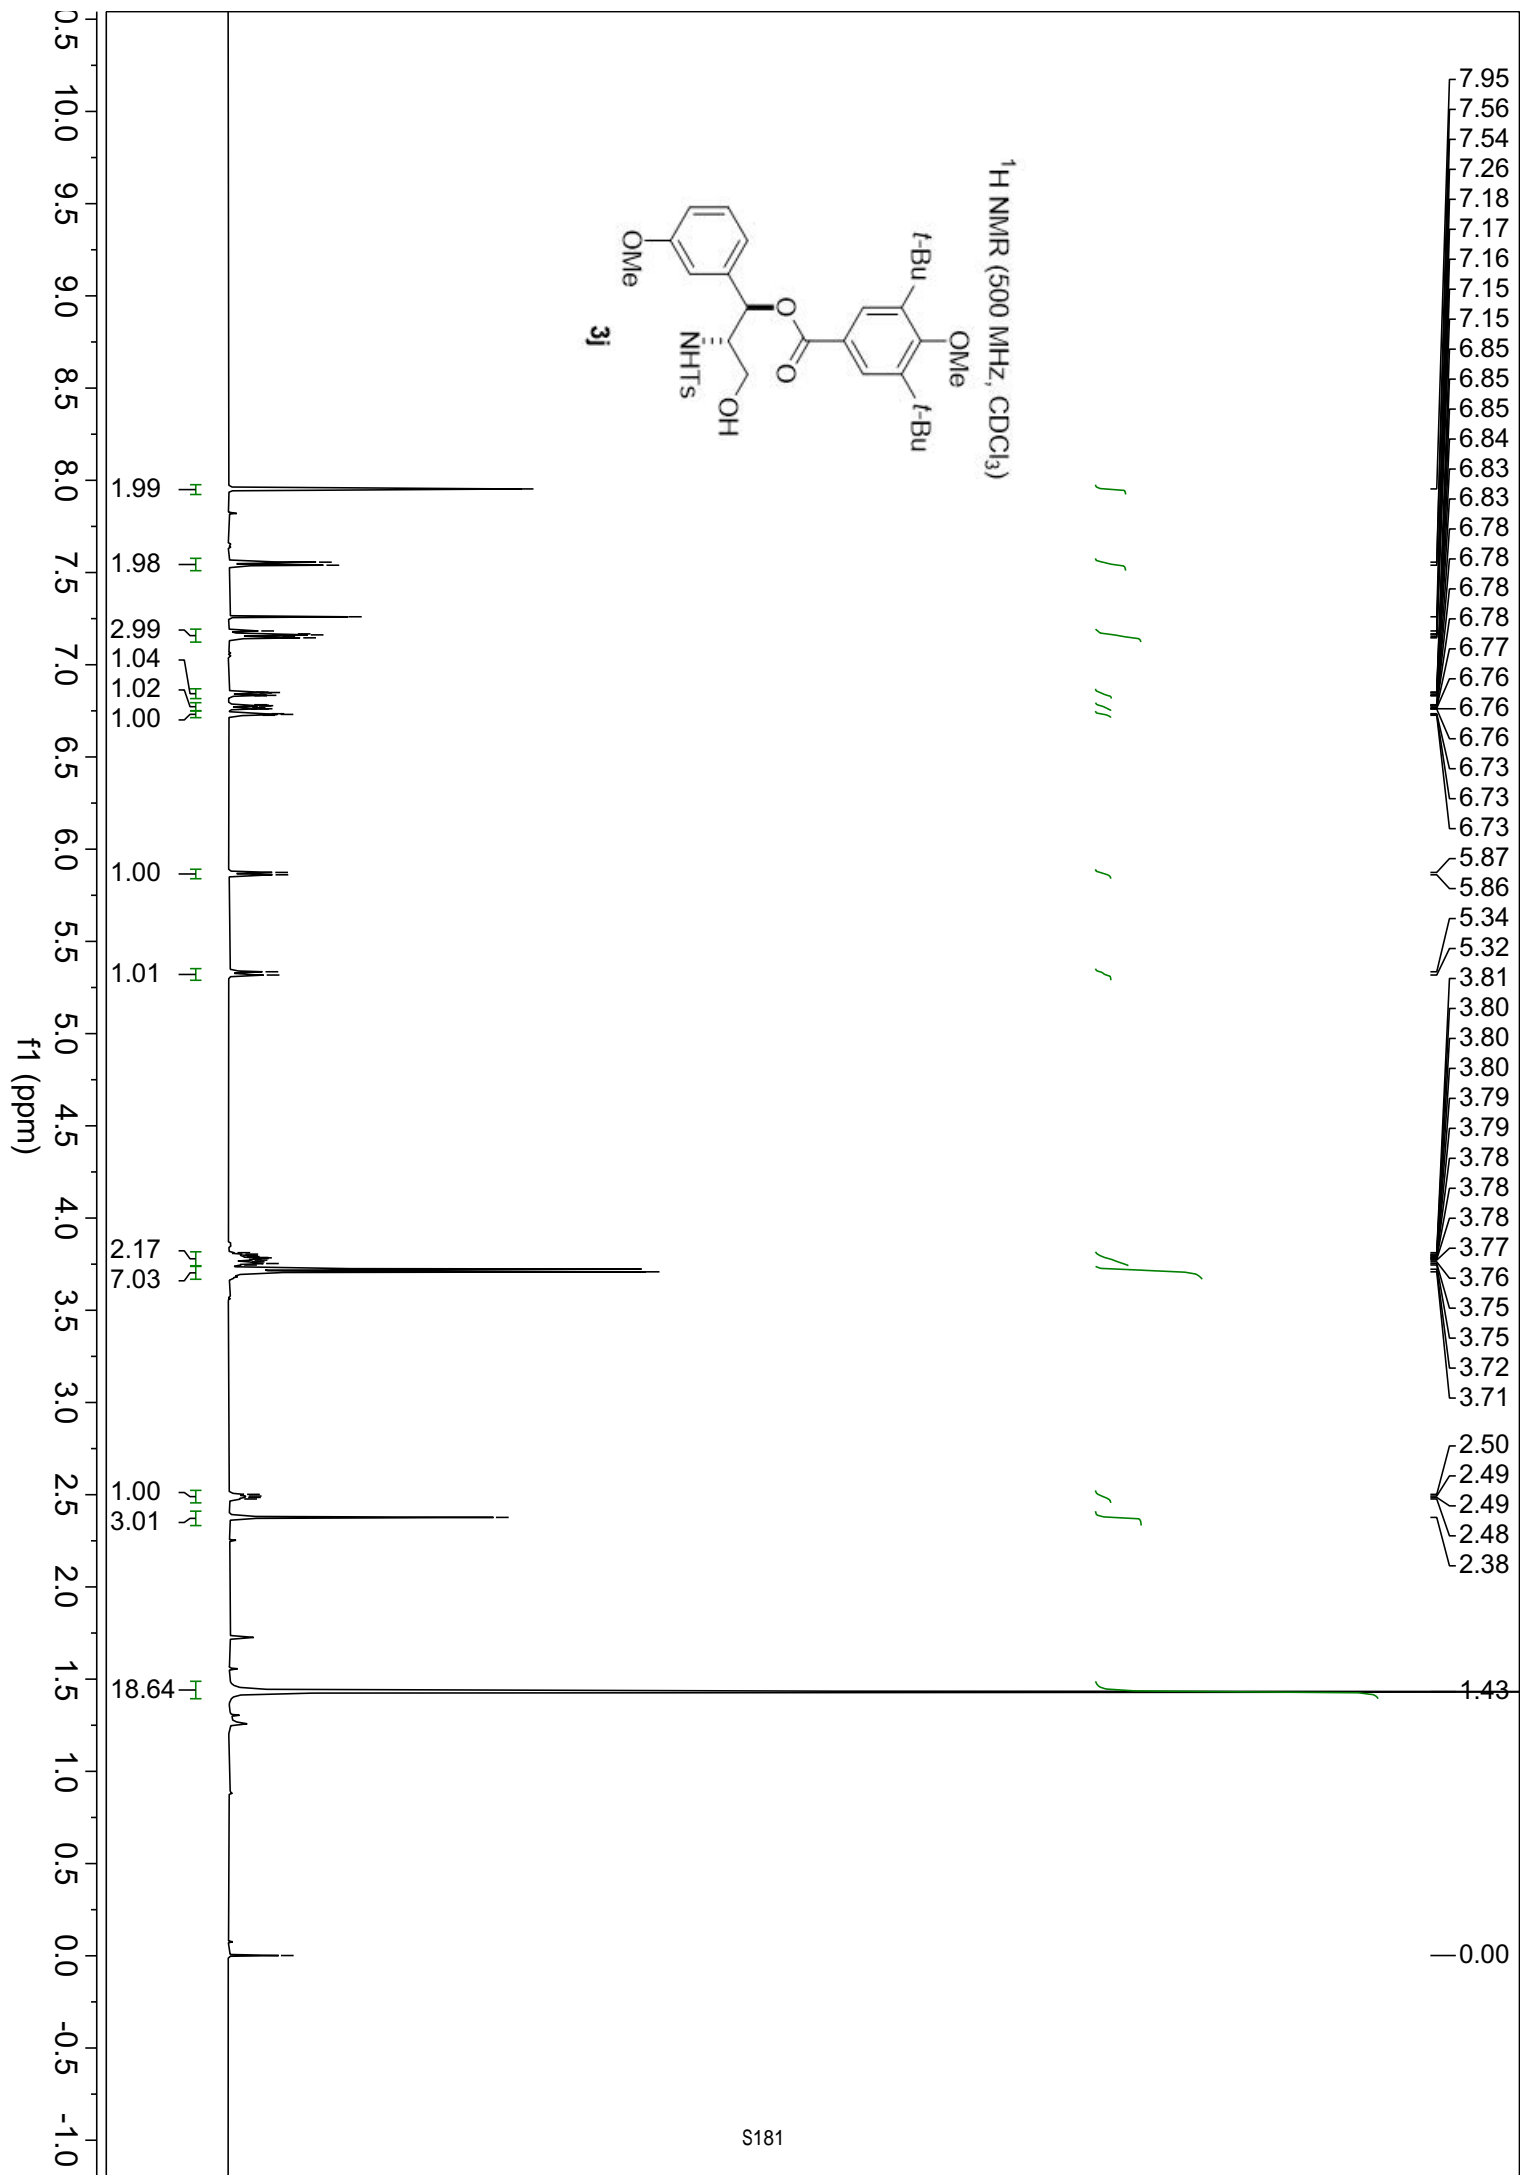

<sup>13</sup>C NMR (126 MHz, CDCl<sub>3</sub>)

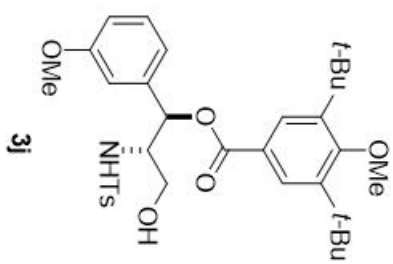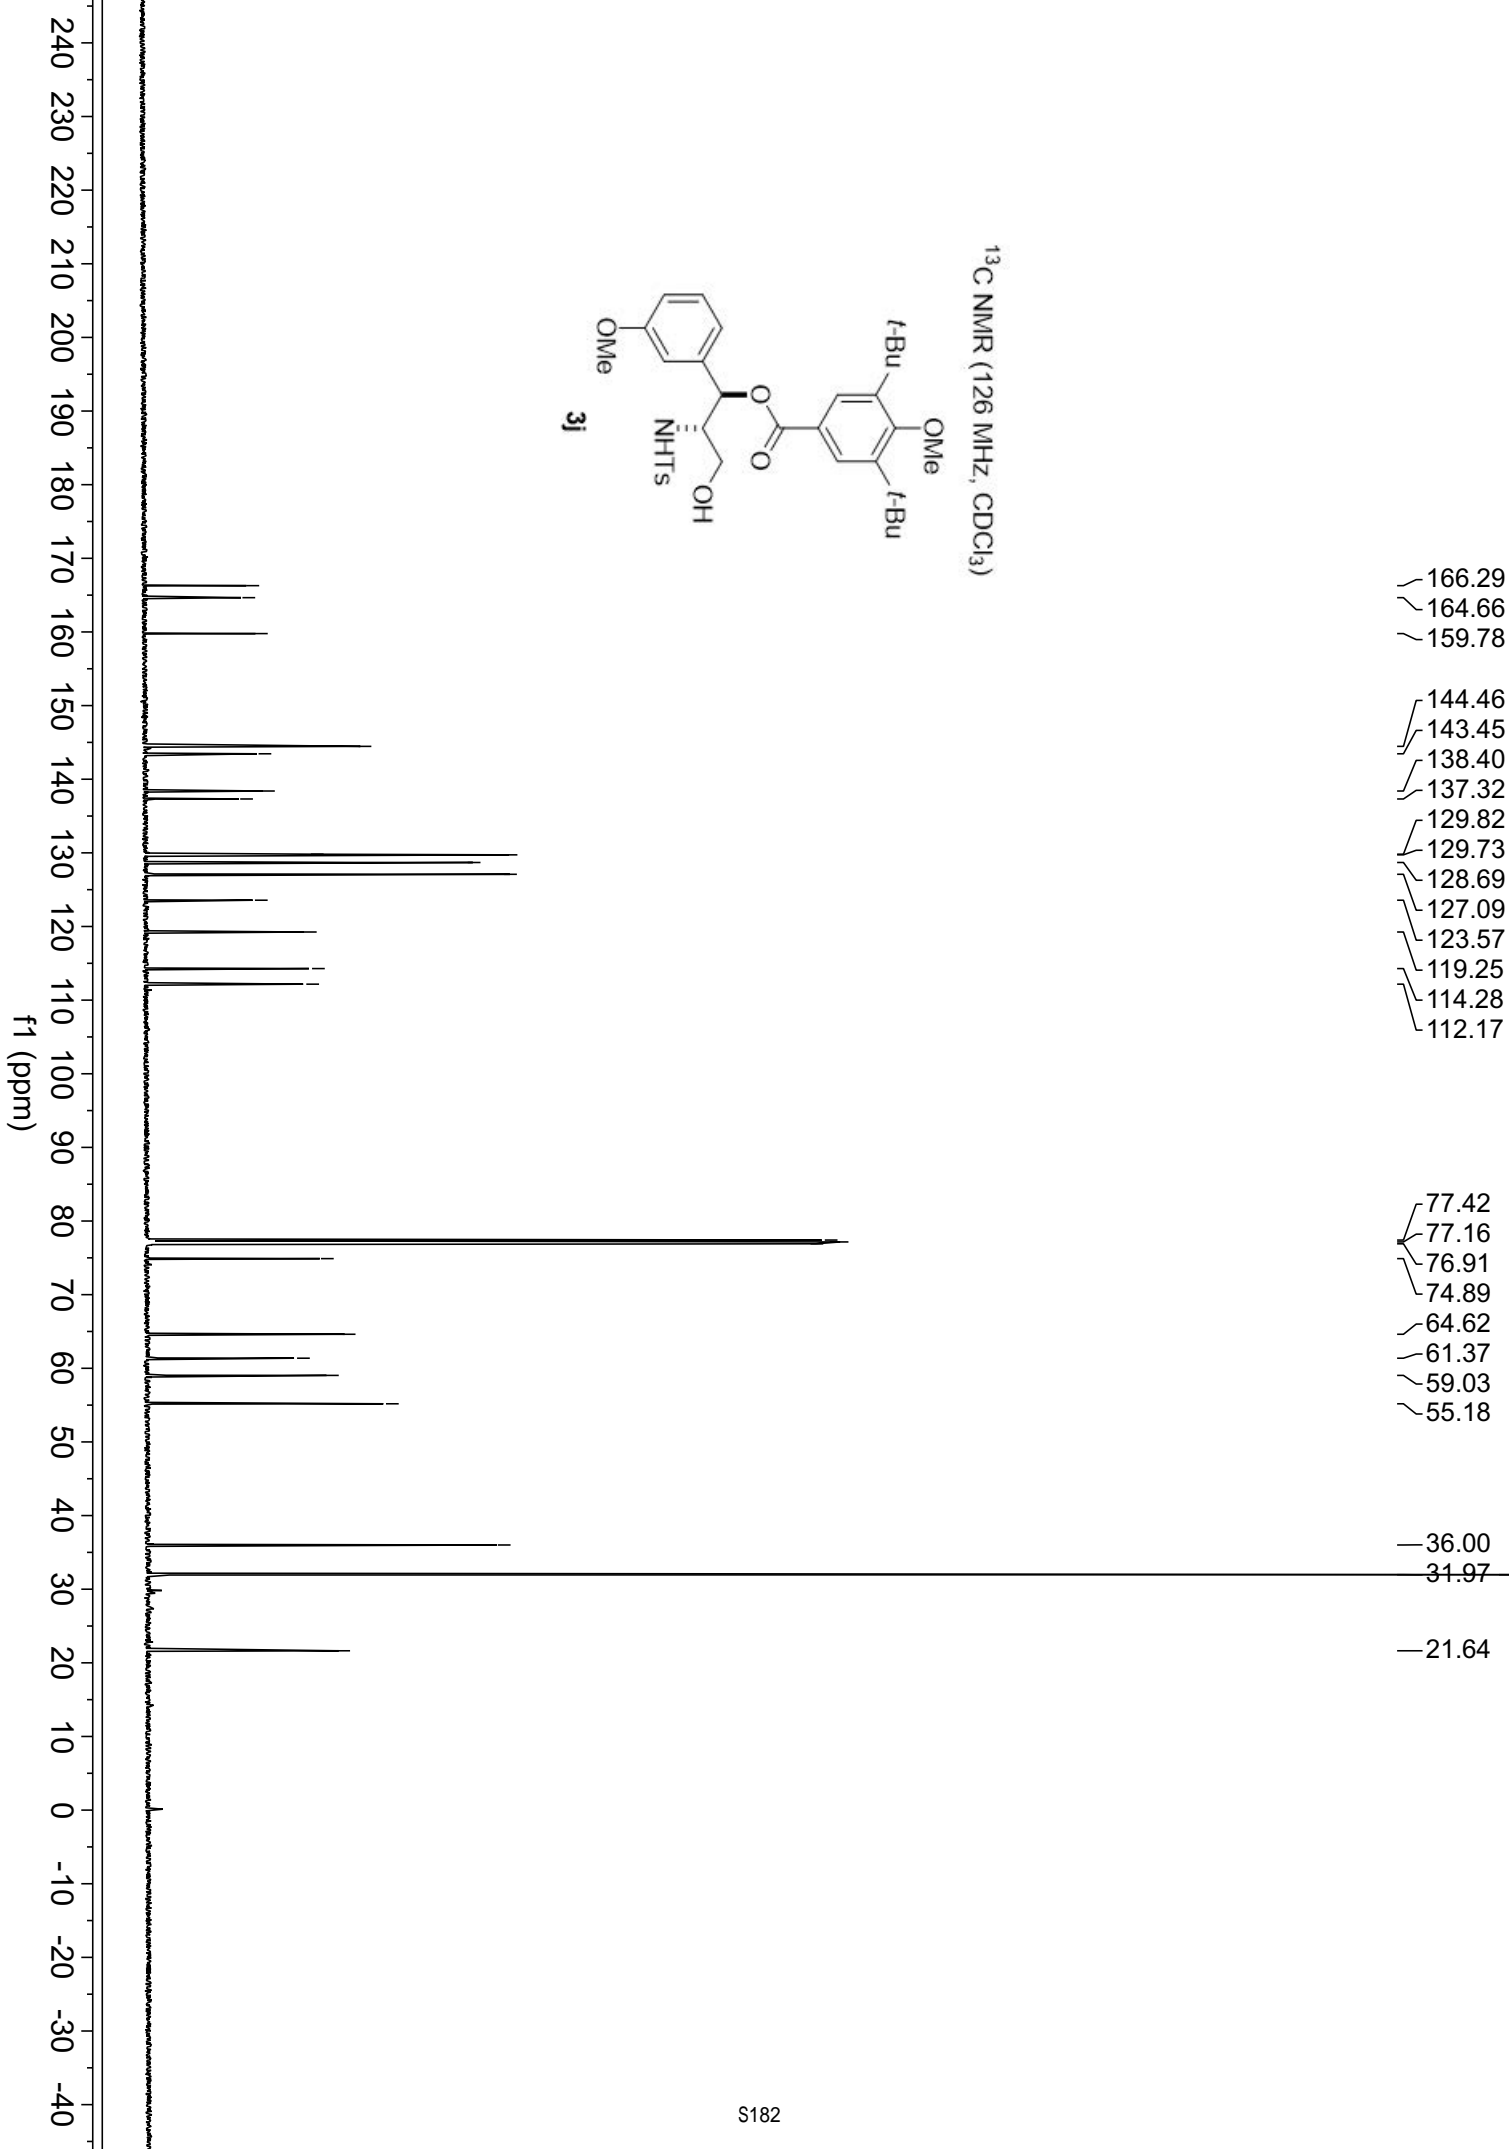

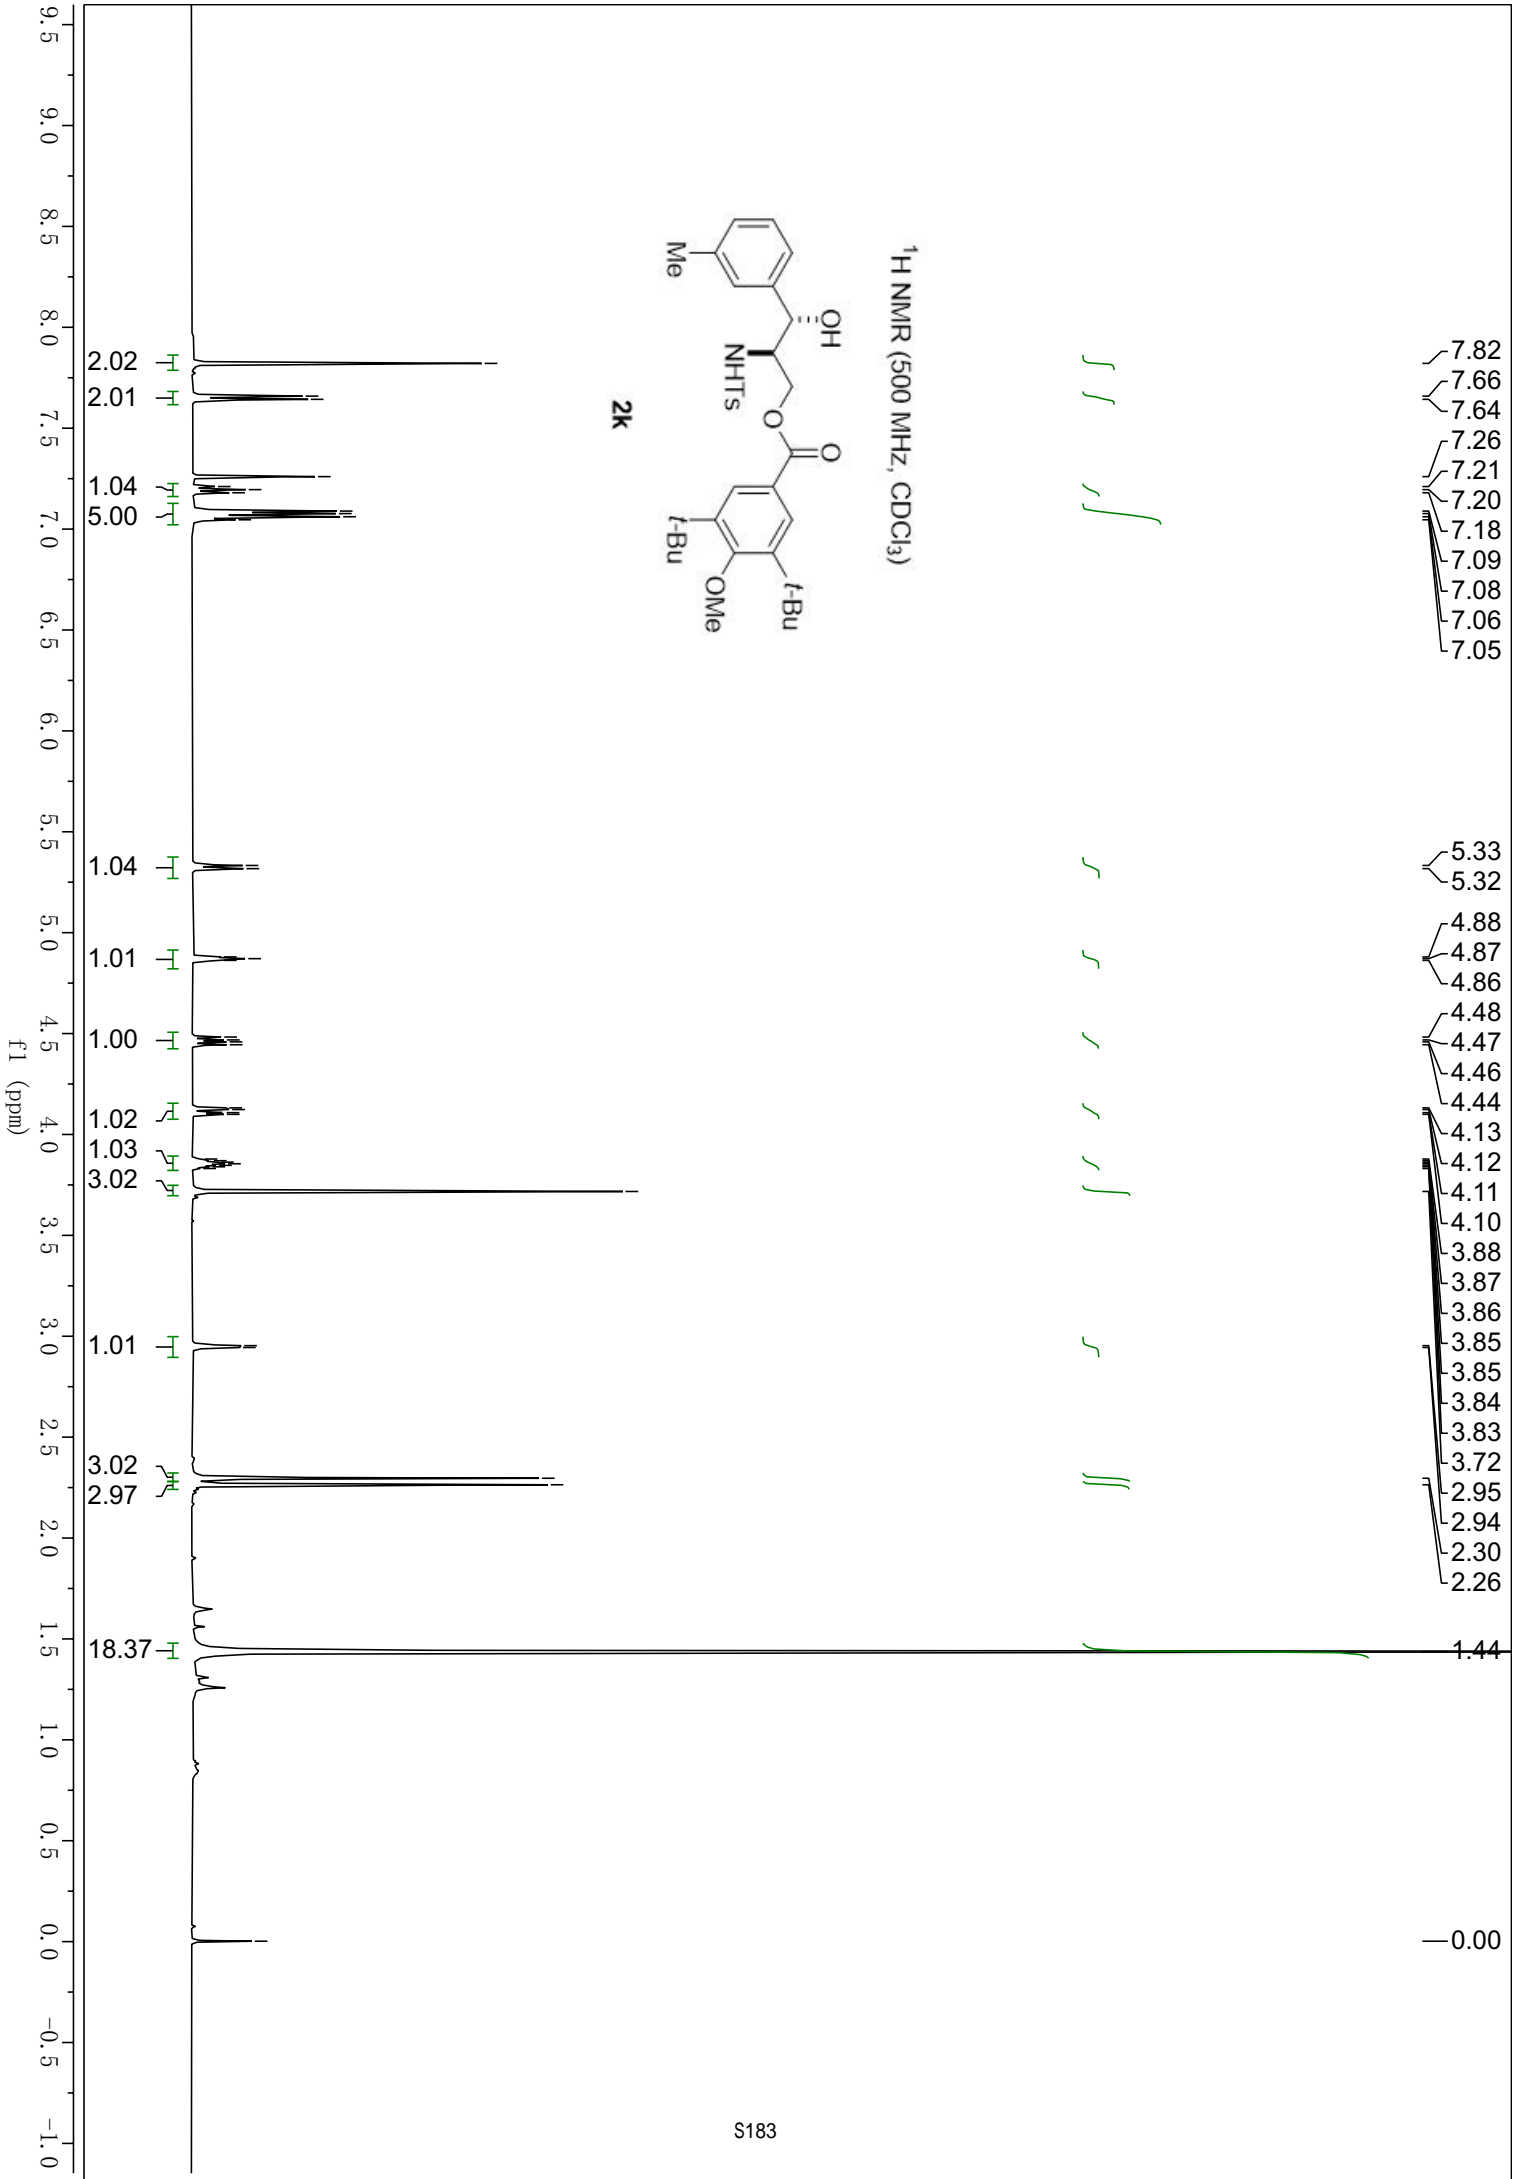

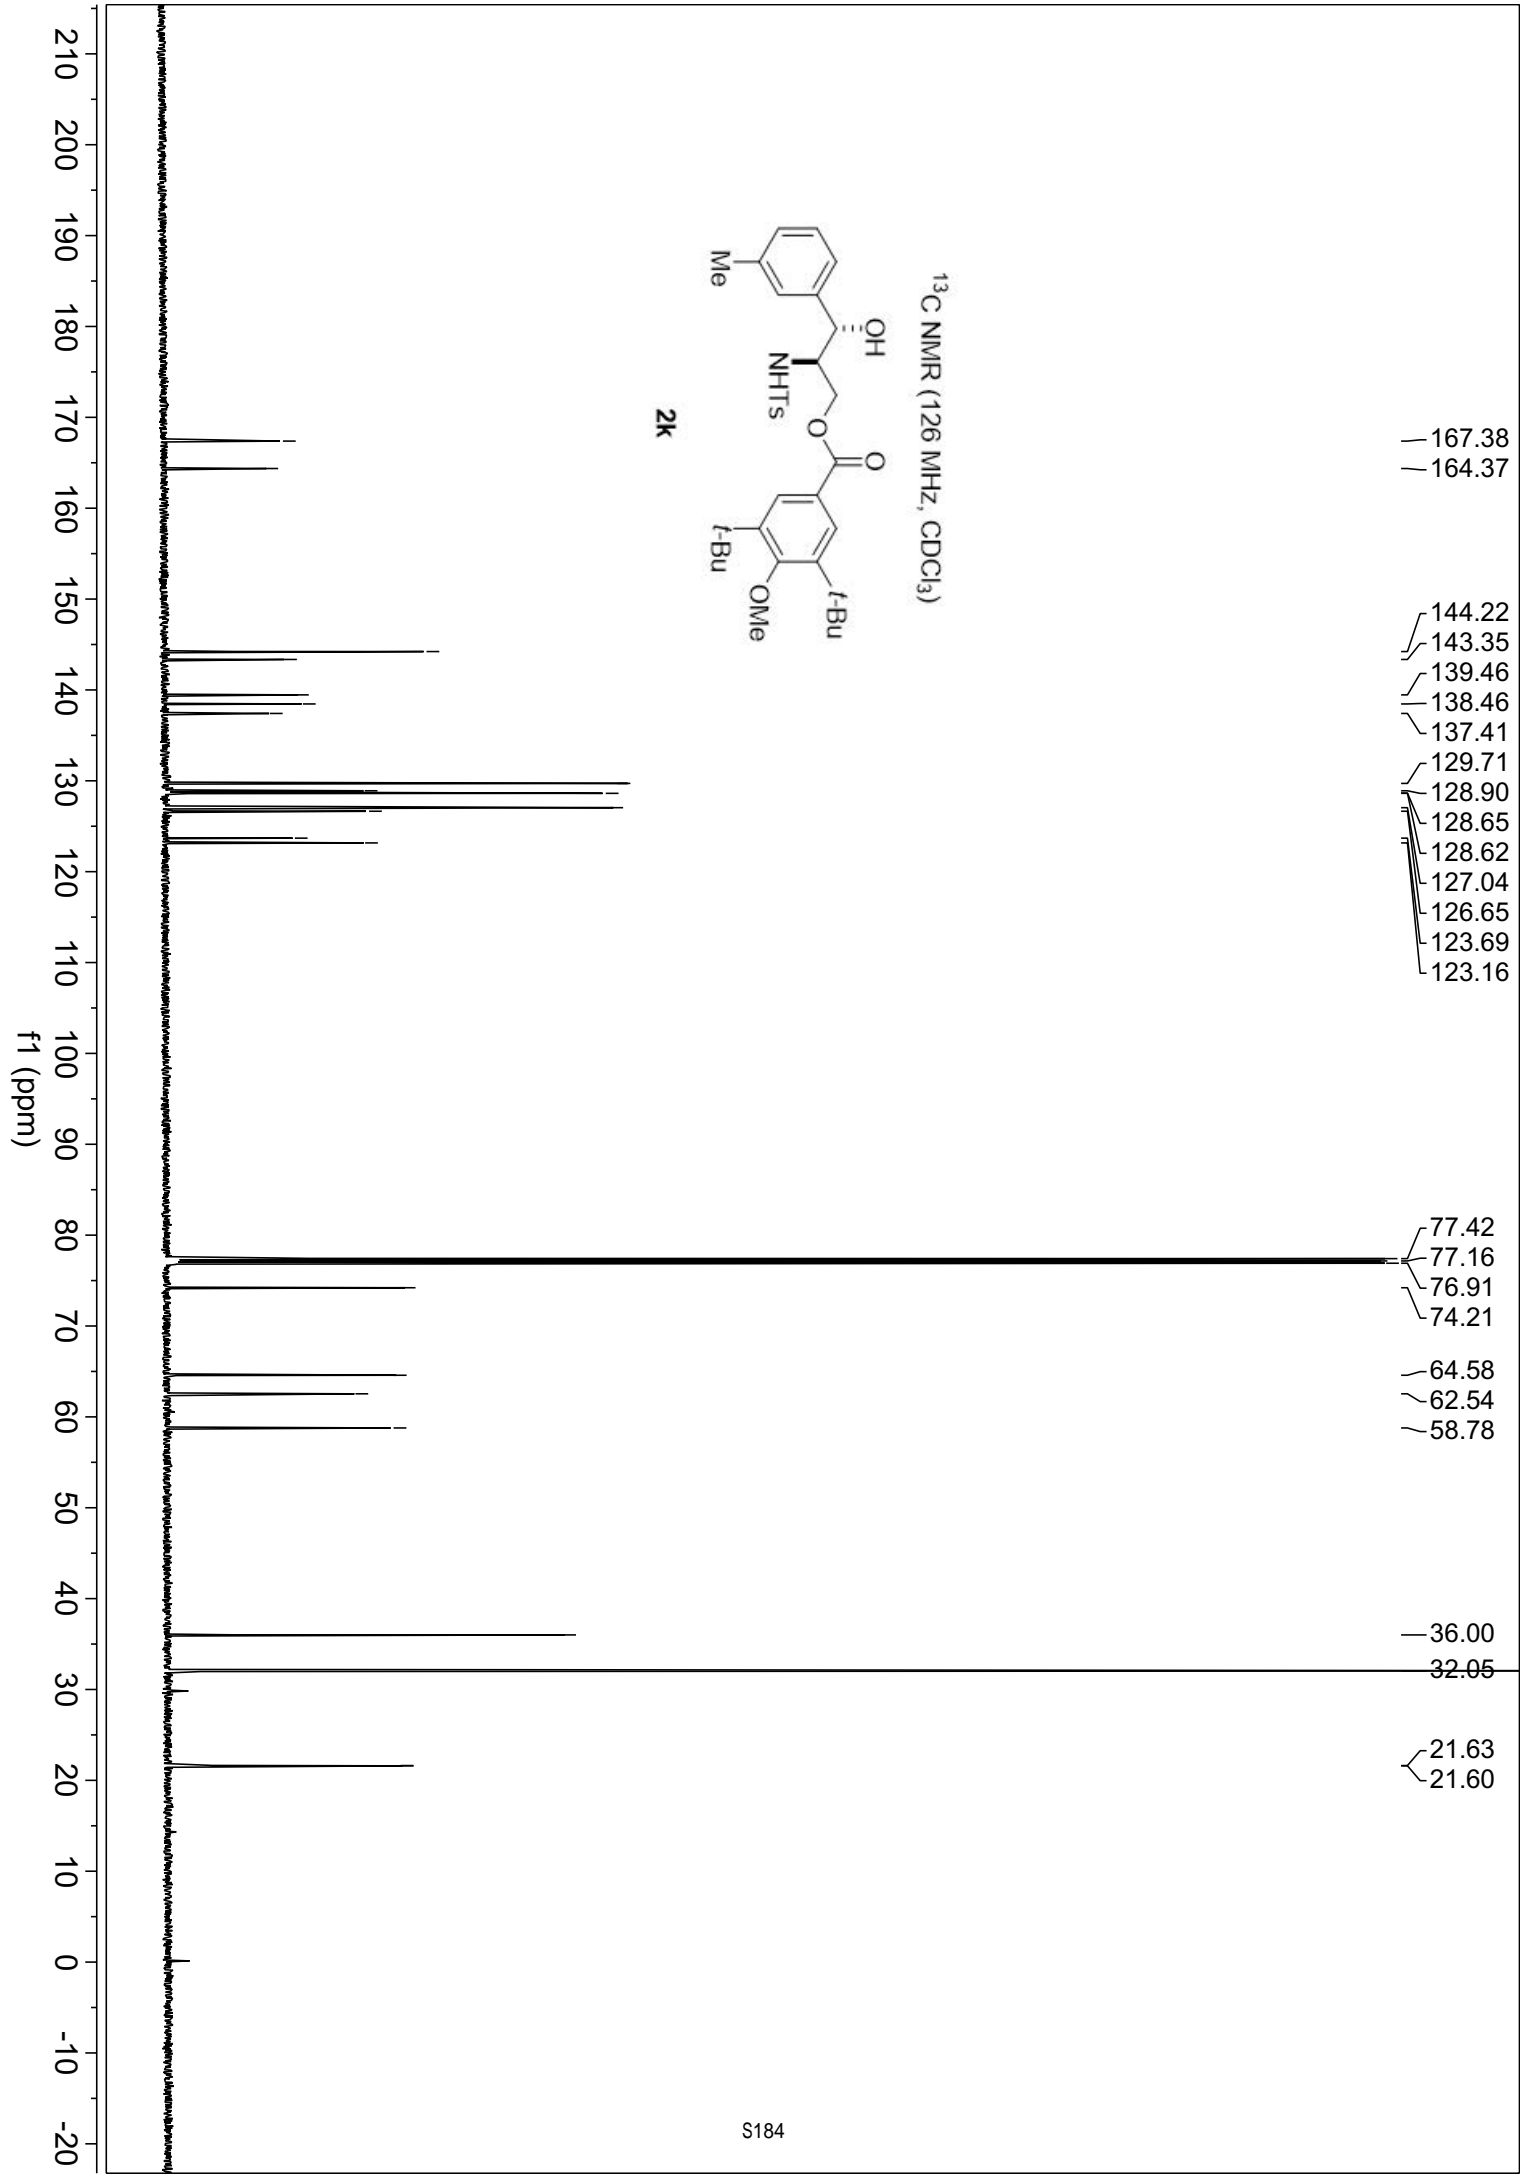



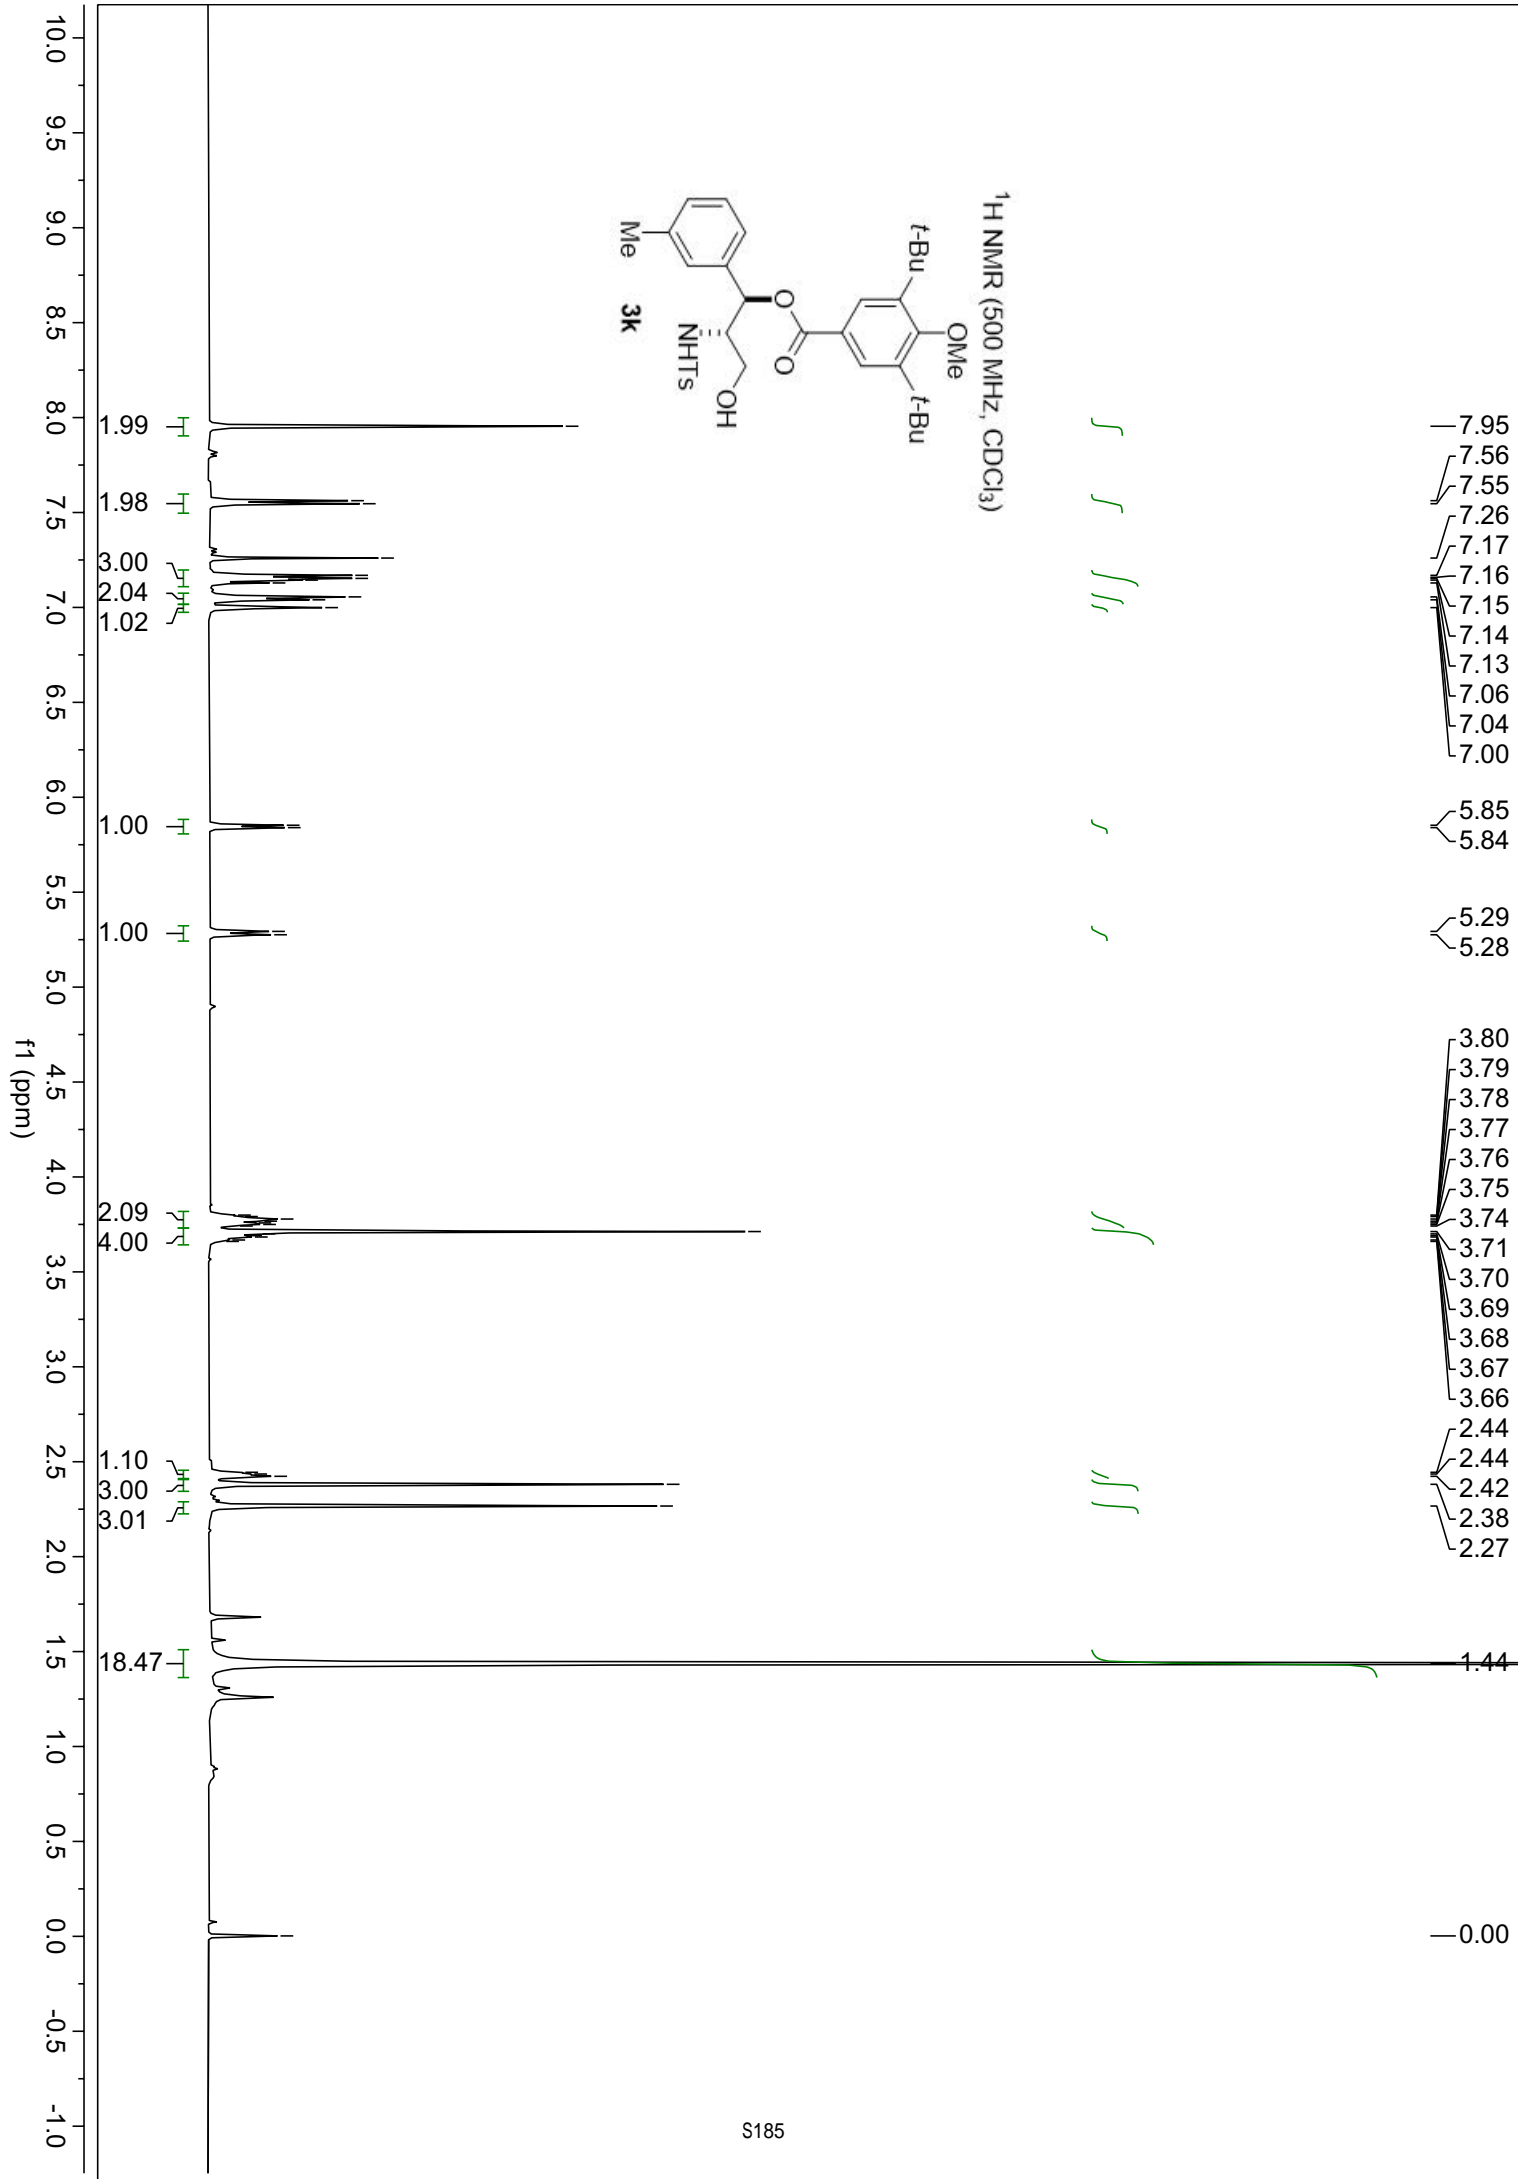

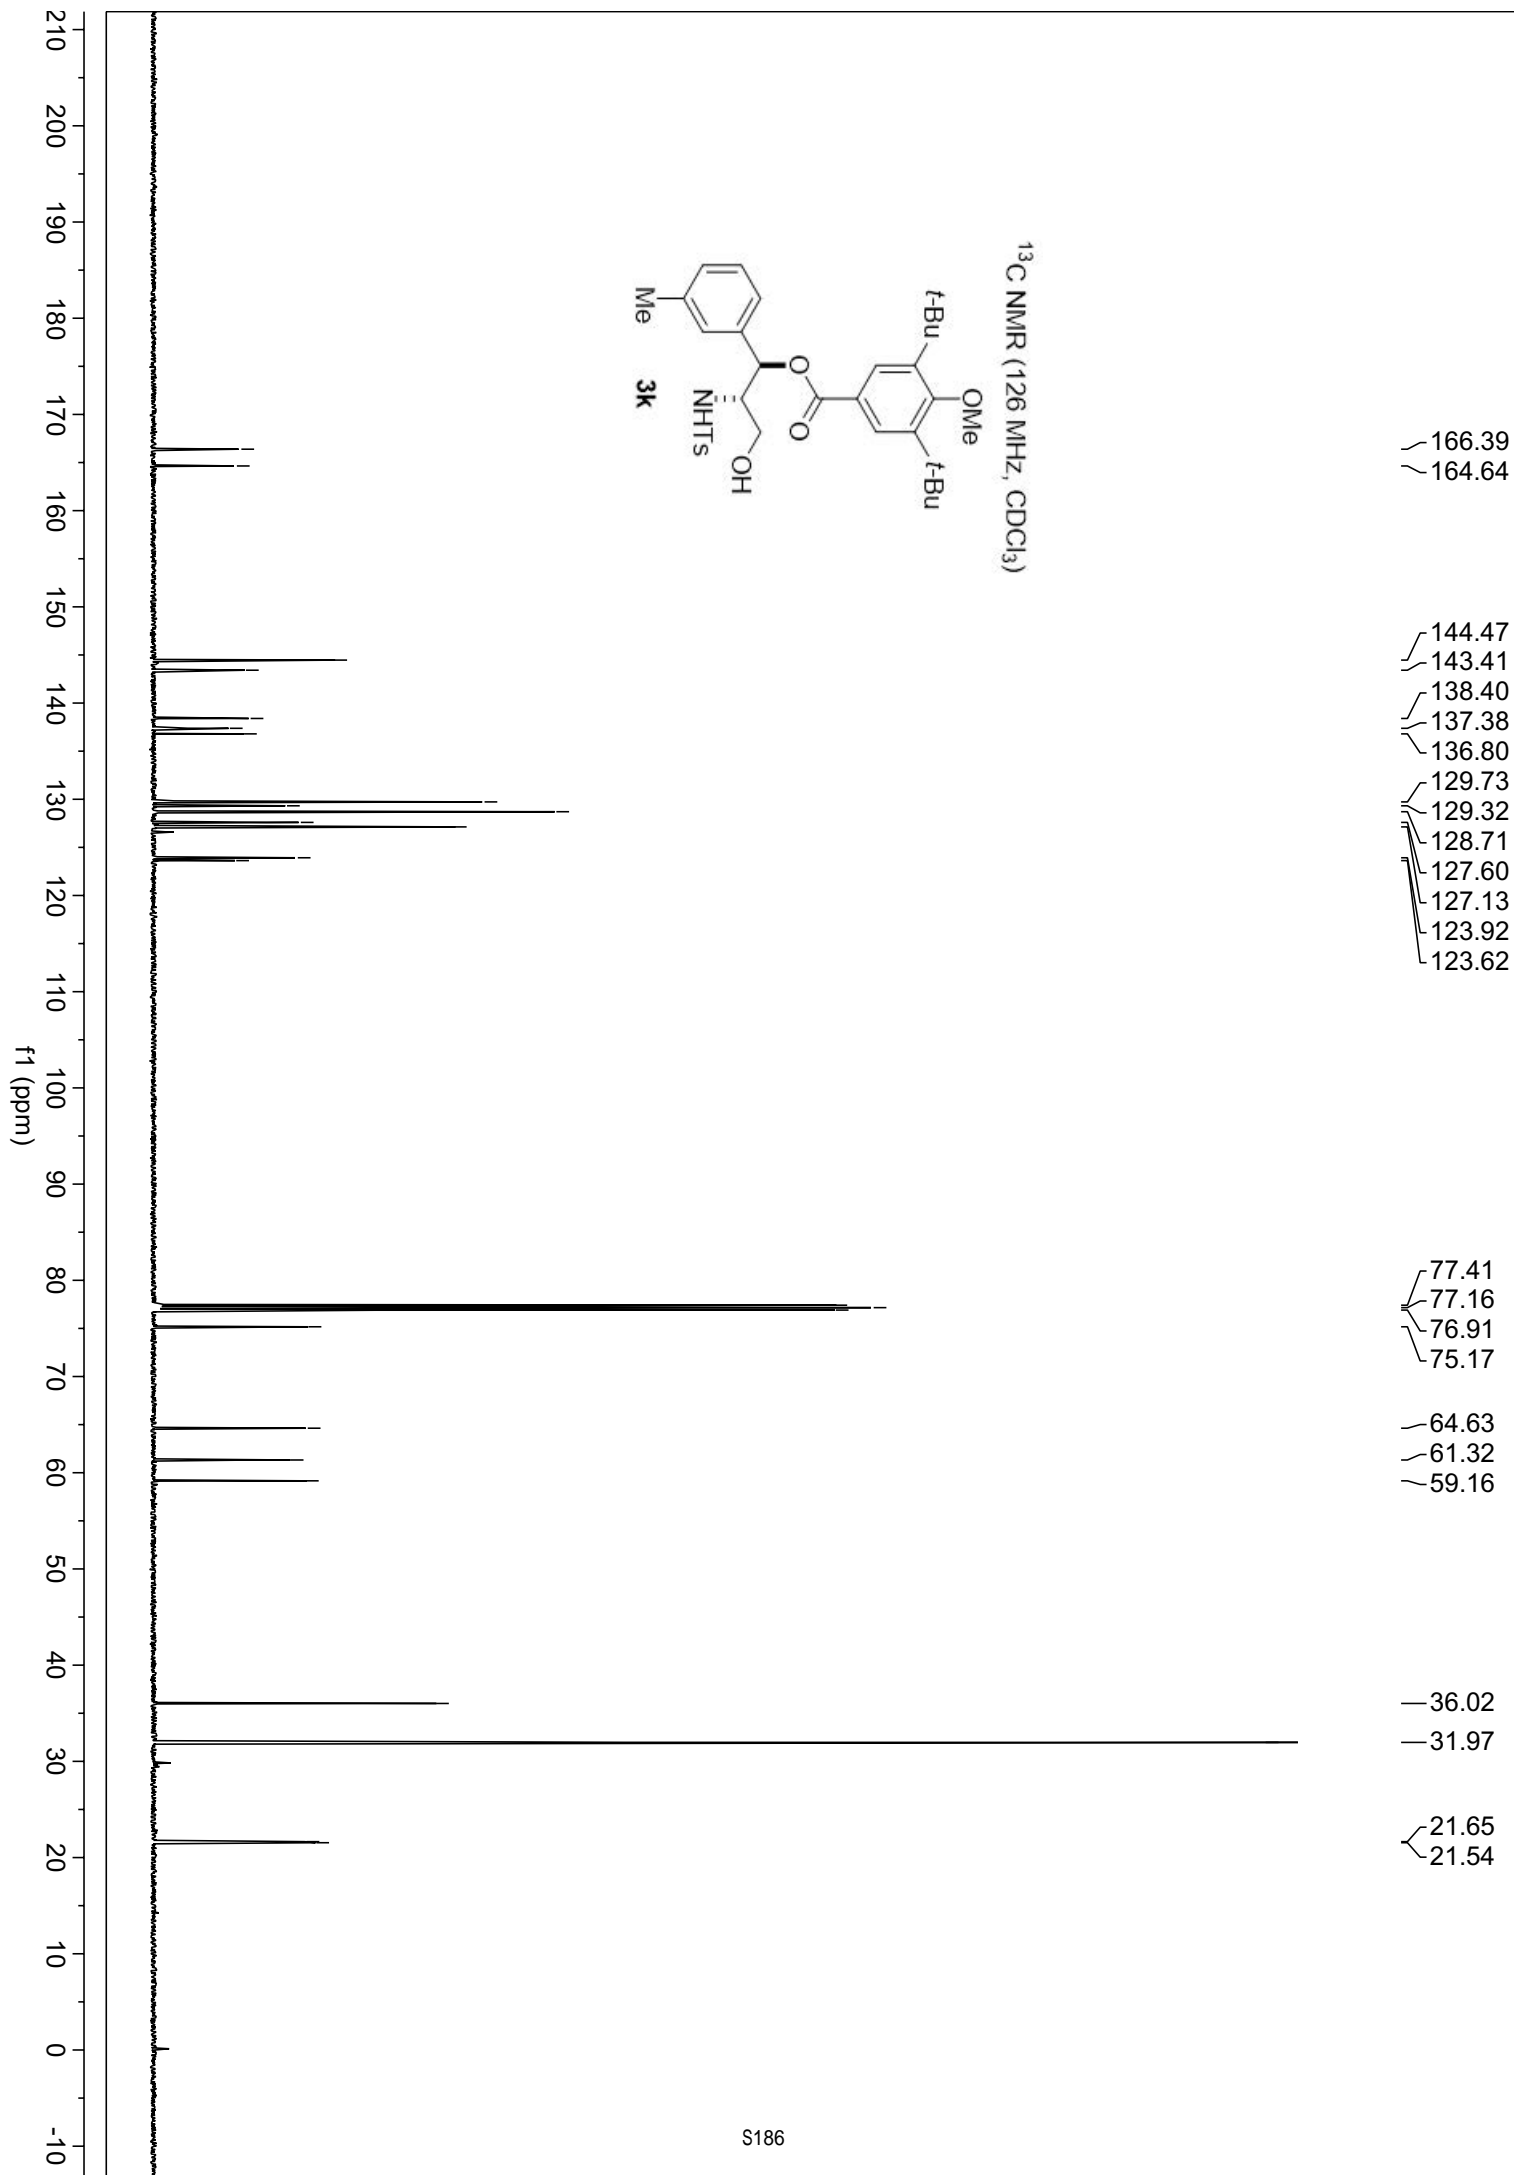

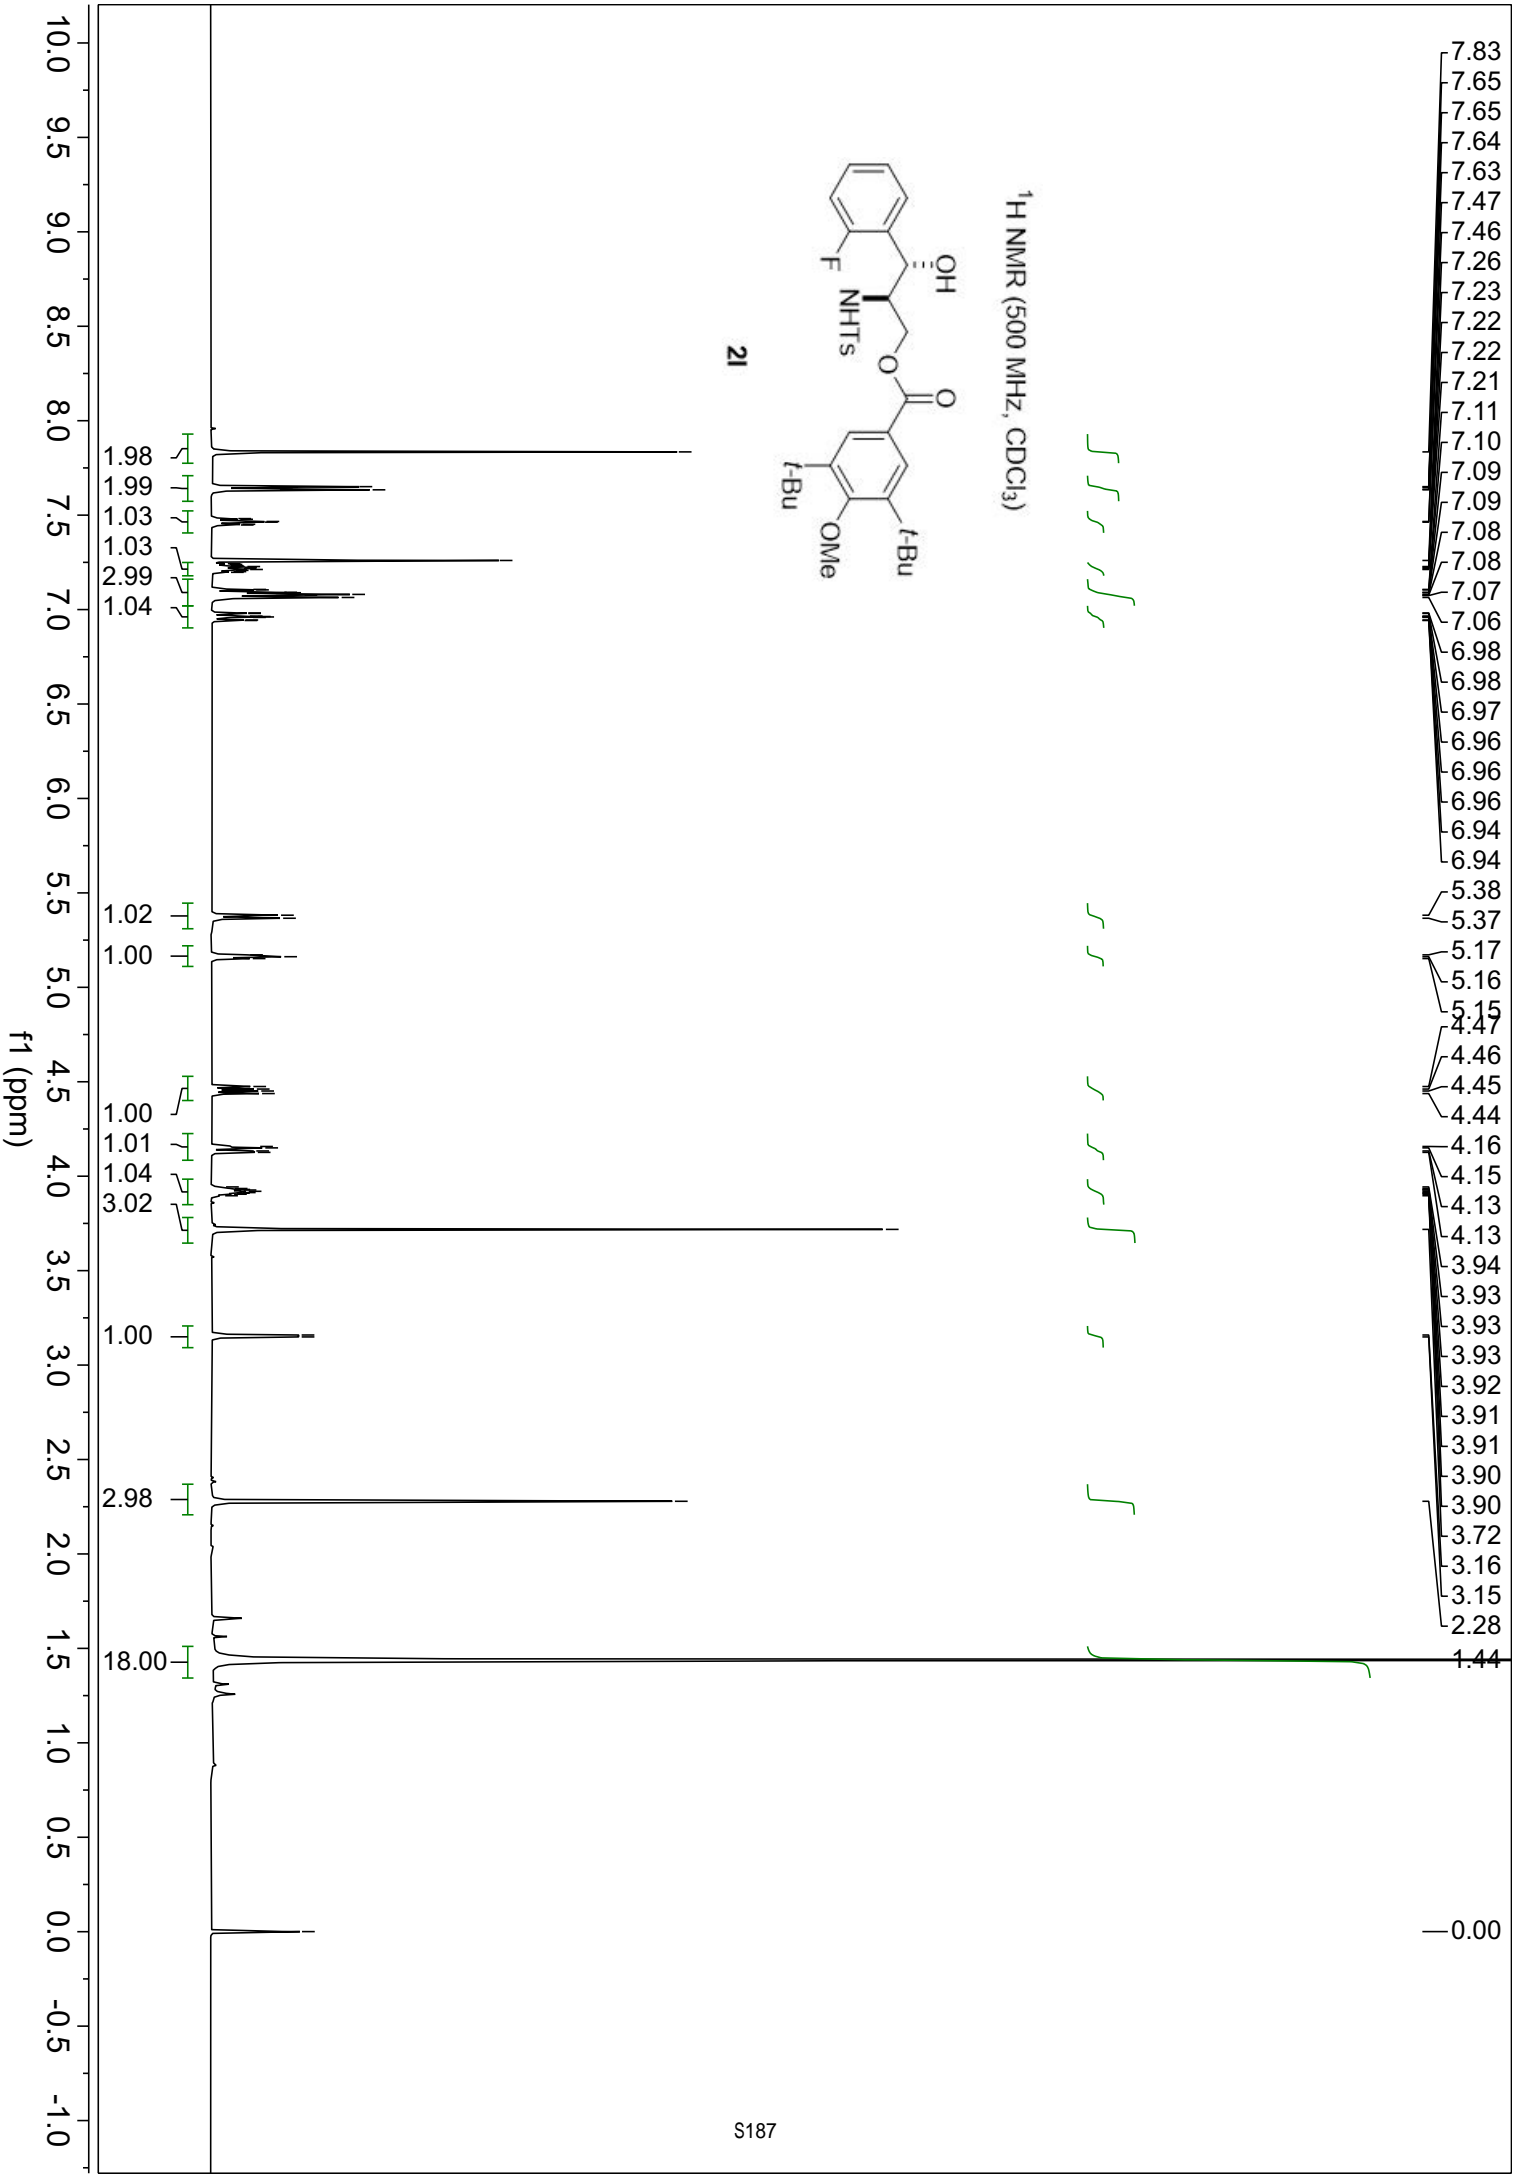

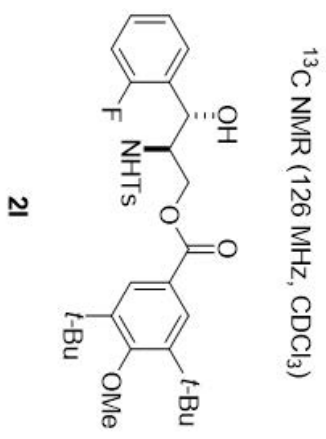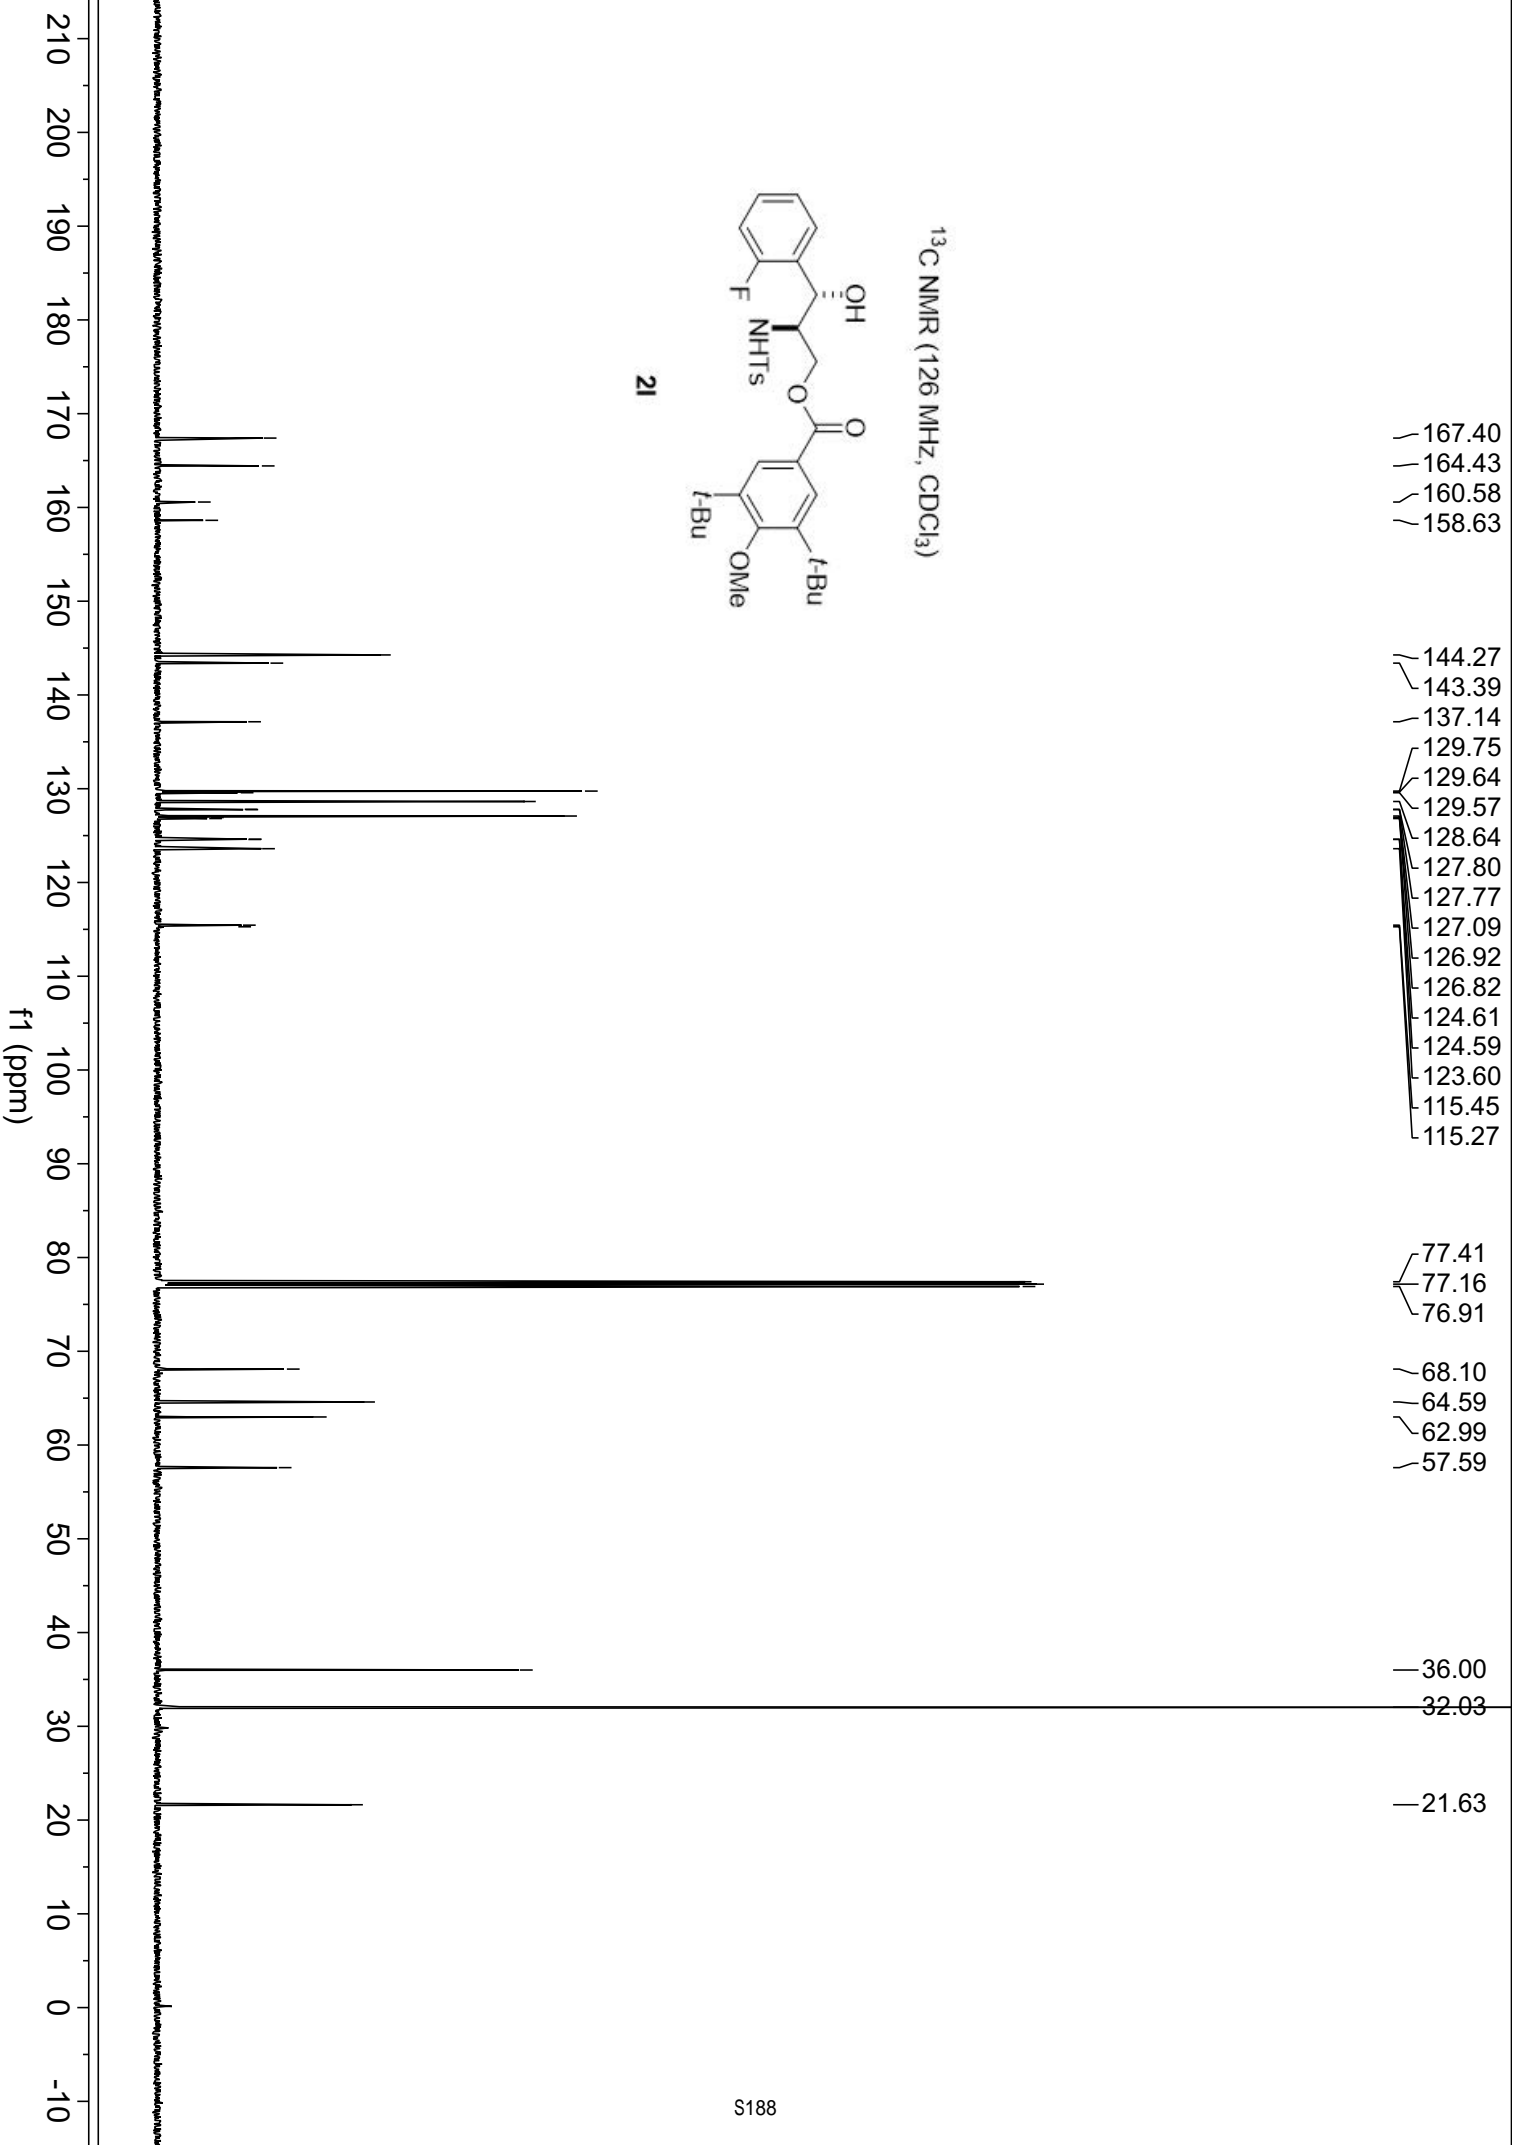

<sup>19</sup>F NMR (471 MHz, CDCl<sub>3</sub>)

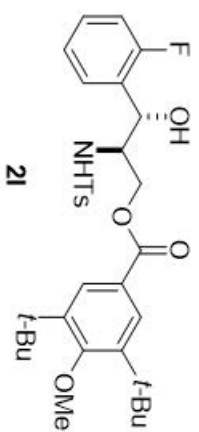

---117.56

20 10 0 -10 -20 -30 -40 -50 -60 -70 -80 -90 -100 -110 -120 -130 -140 -150 -160 -170 -180 -190 -200 -210 -220

f1 (ppm)

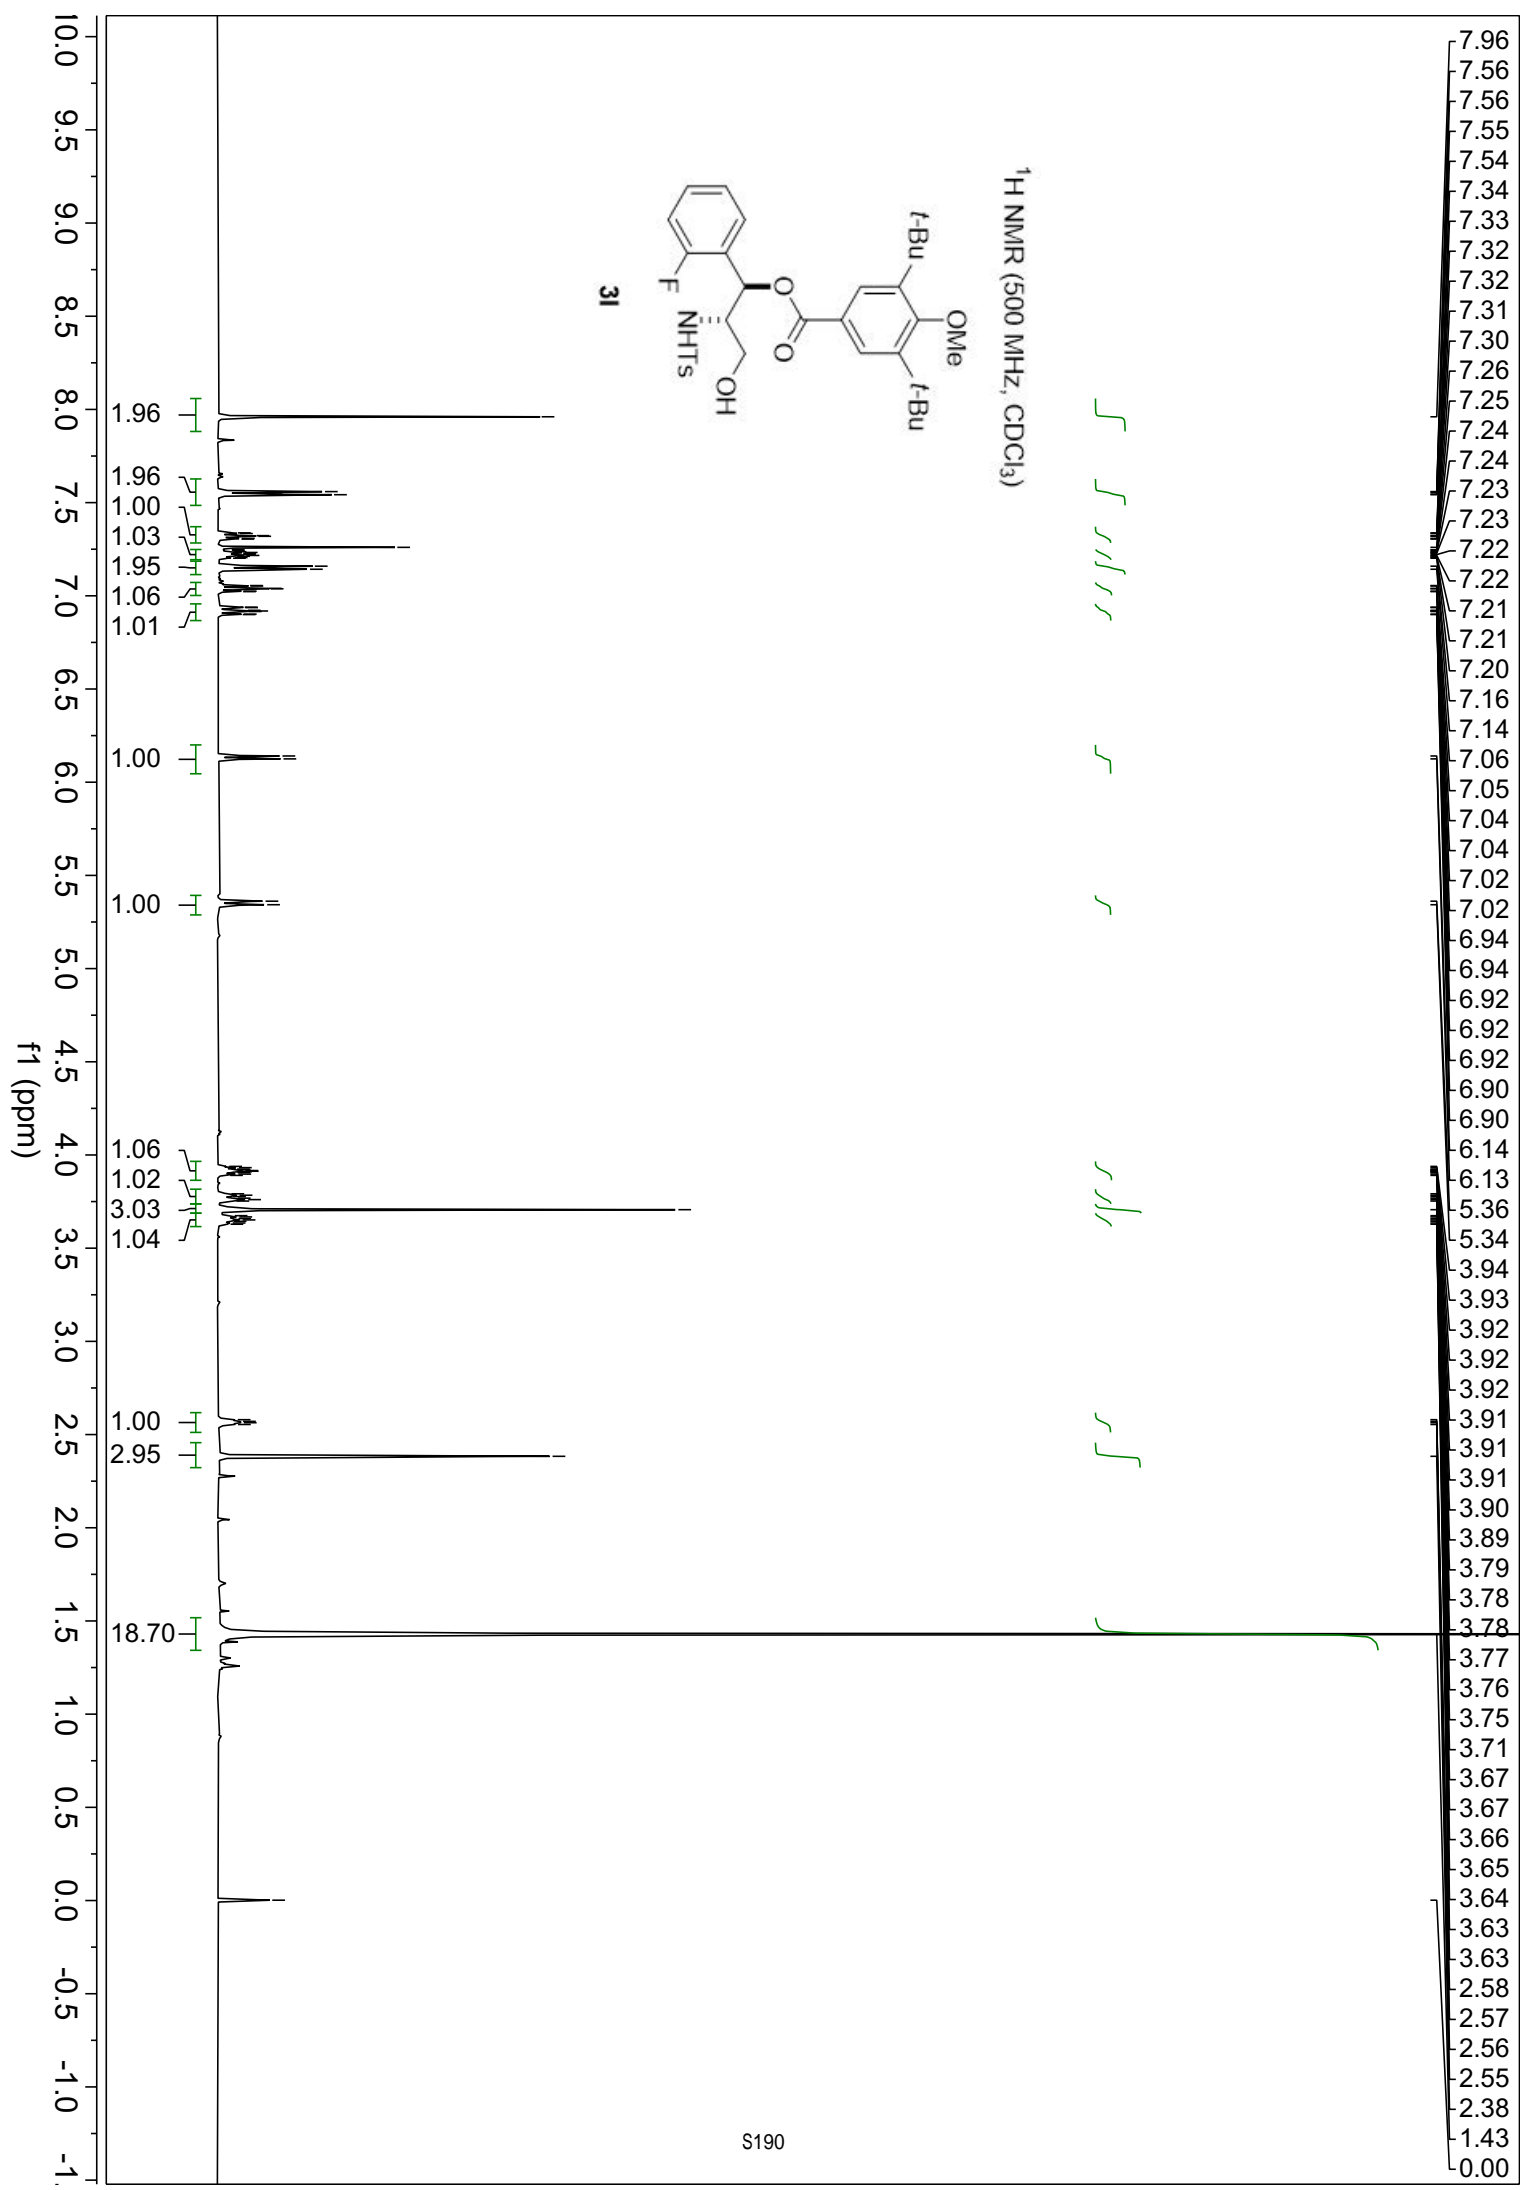

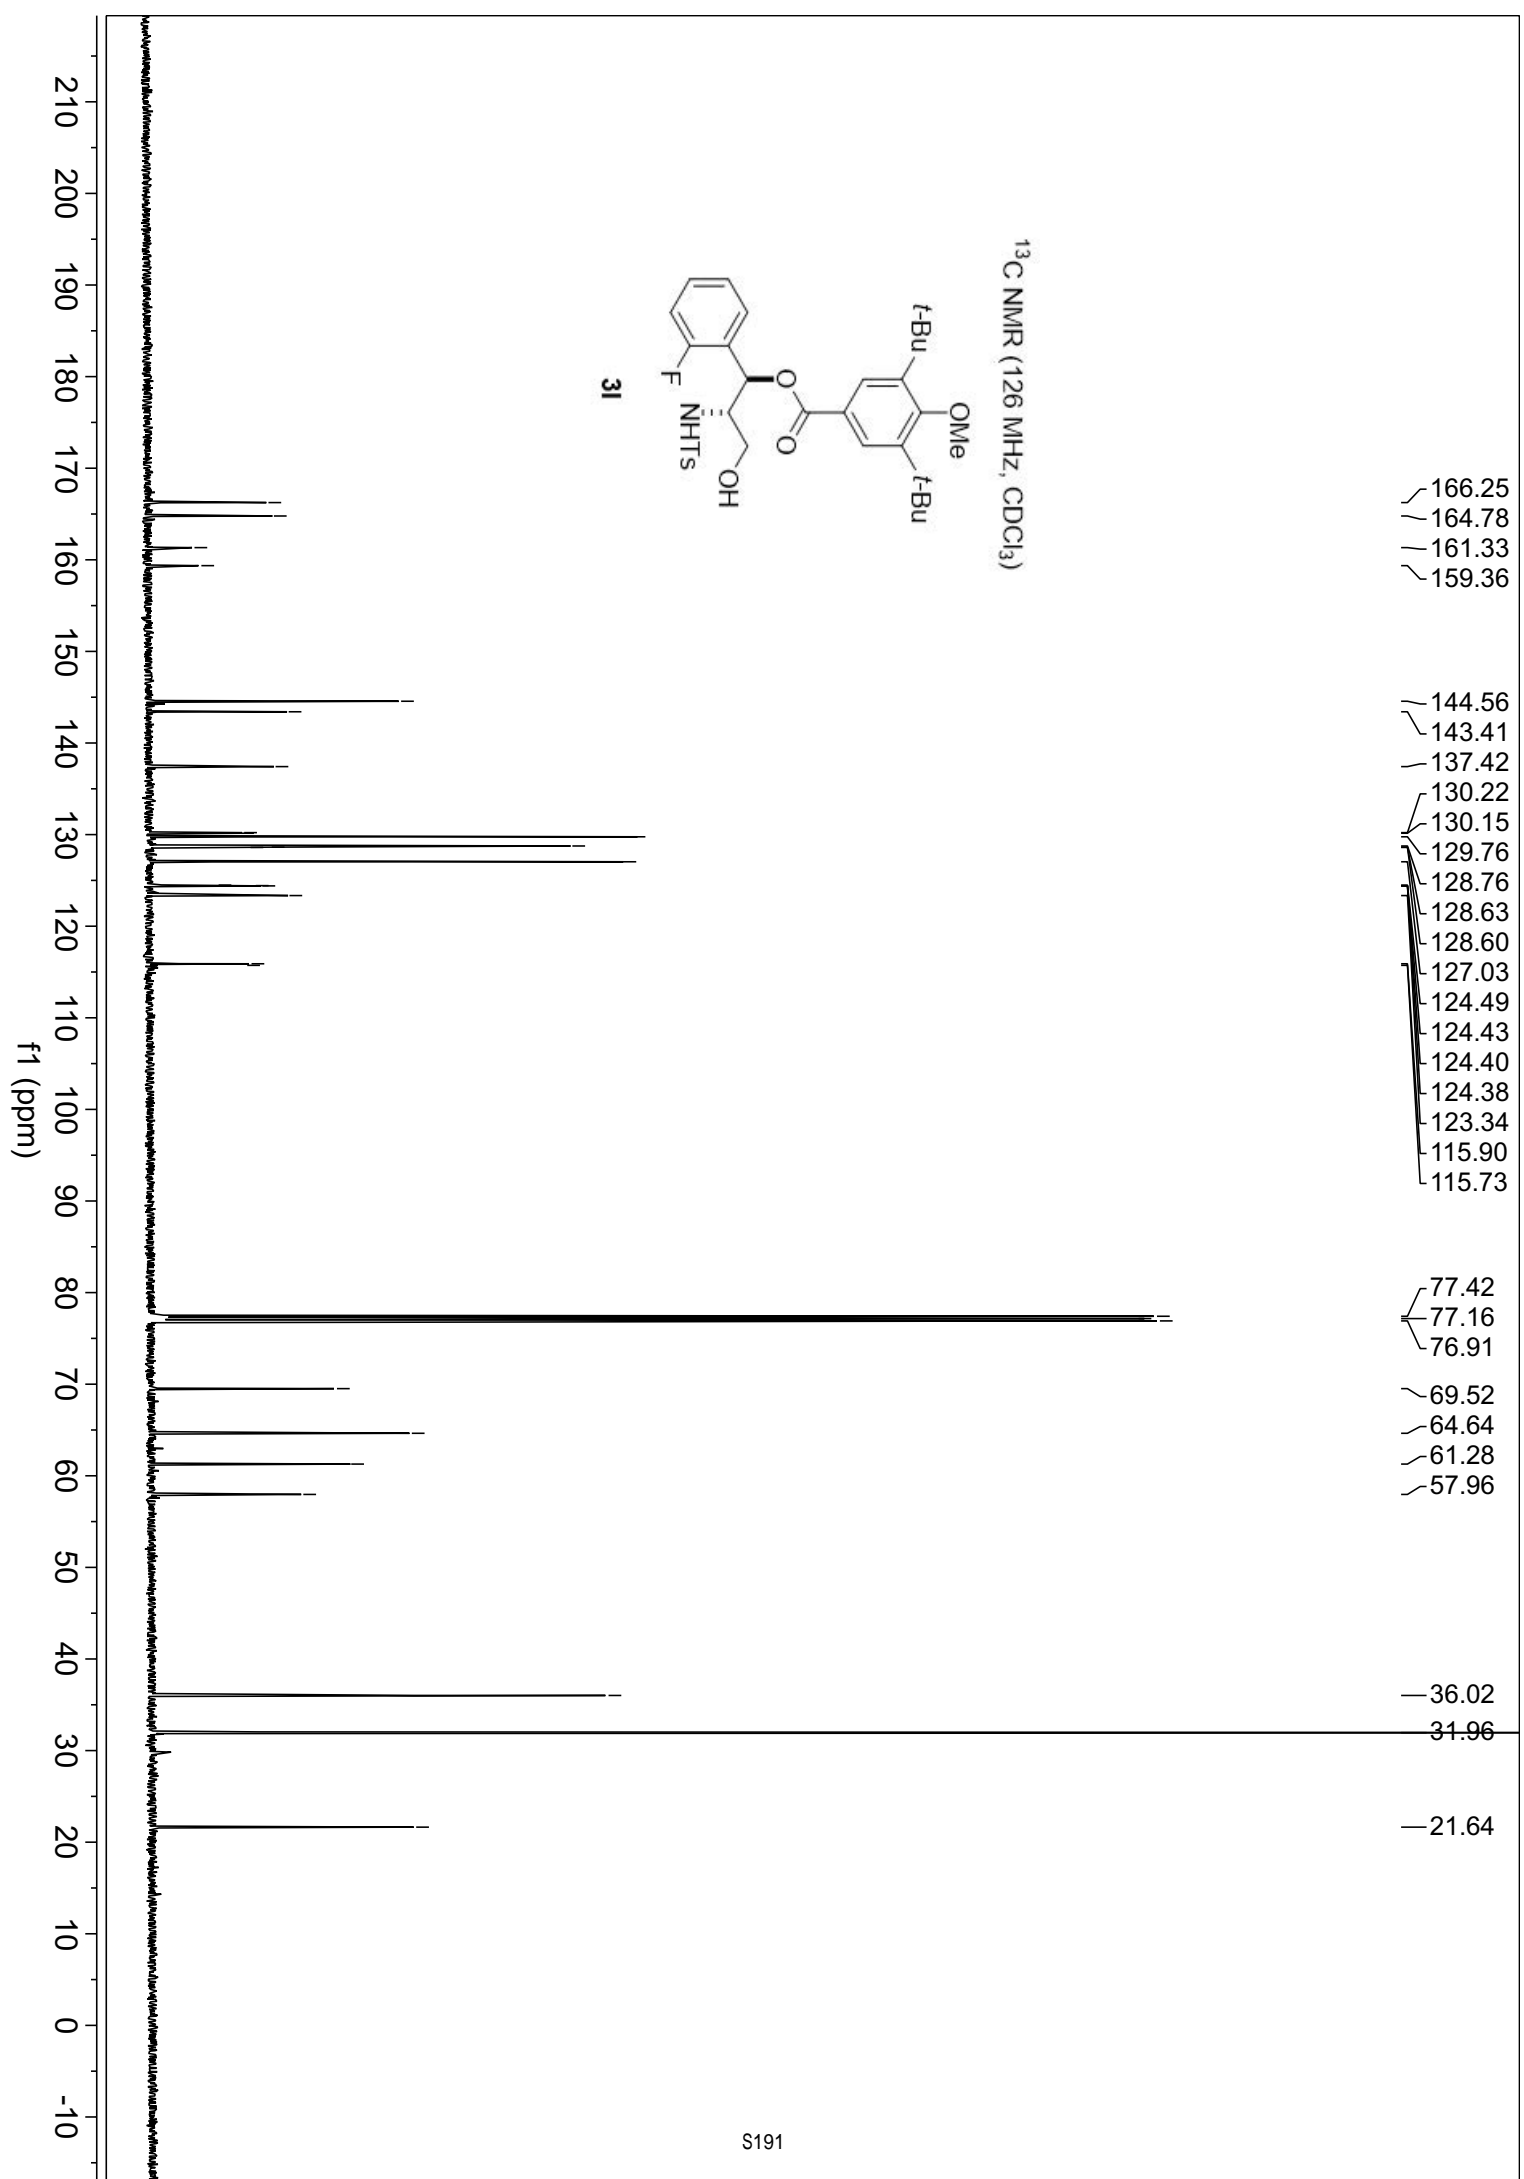

-116.54

<sup>19</sup>F NMR (471 MHz, CDCl<sub>3</sub>)

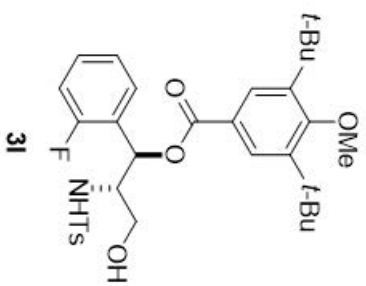

31

20 10 0 -10 -20 -30 -40 -50 -60 -70 -80 -90 -100 -110 -120 -130 -140 -150 -160 -170 -180 -190 -200 -210 -220

f1 (ppm)



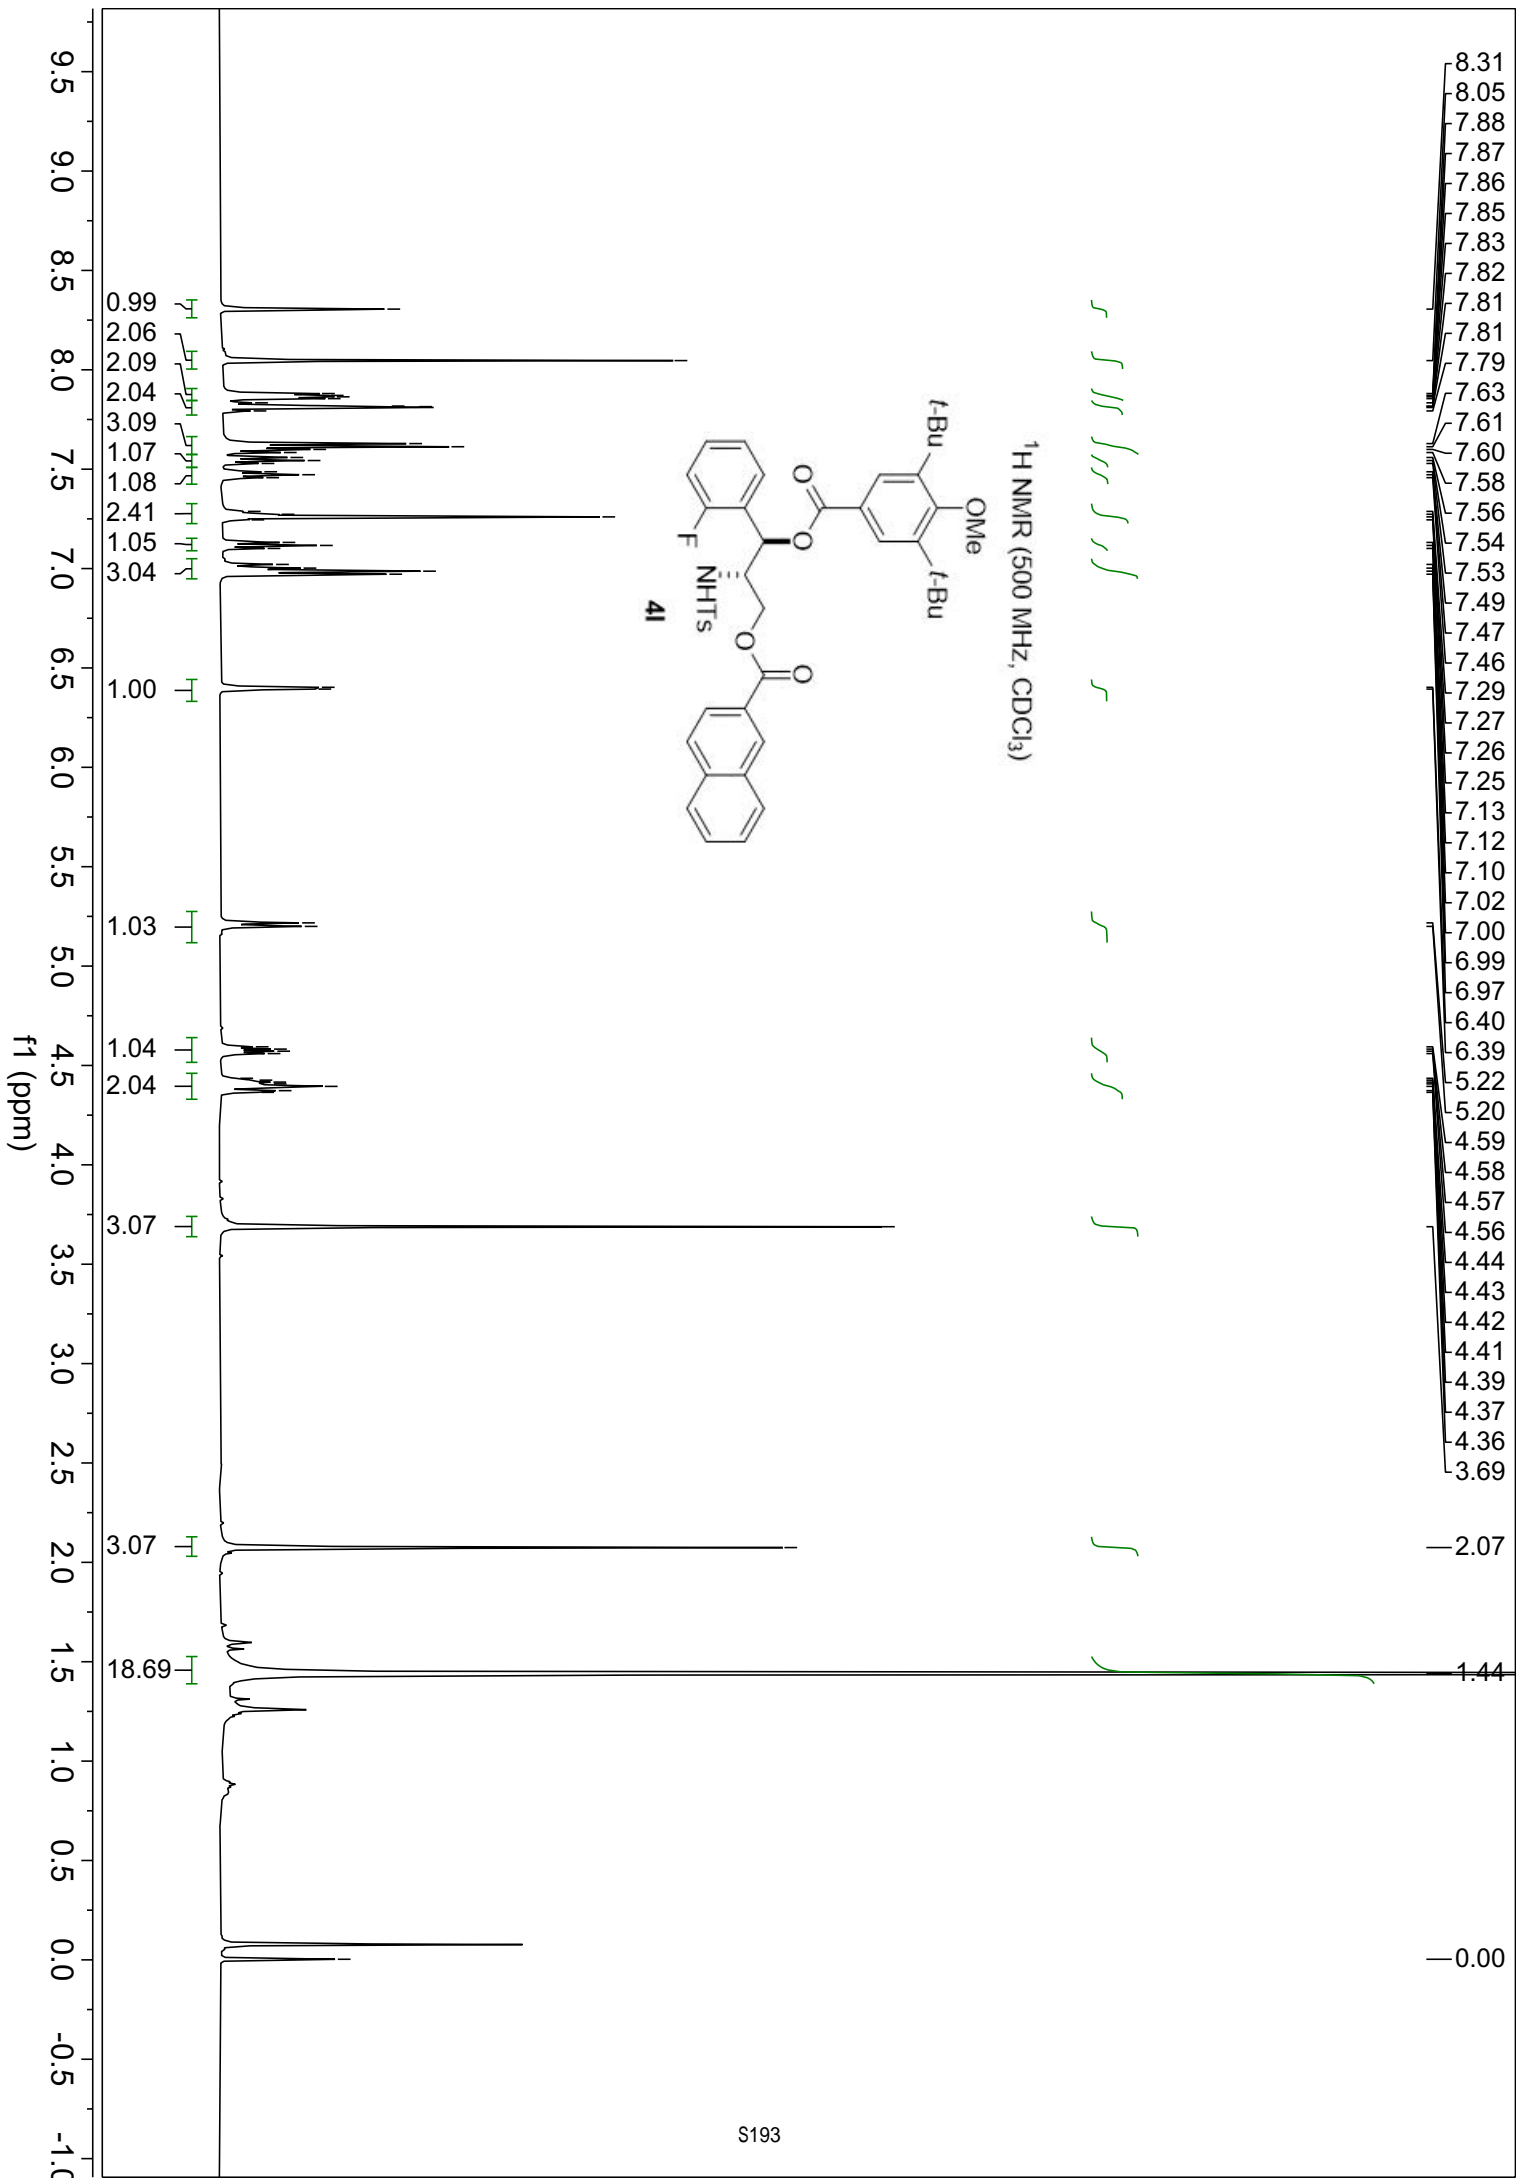

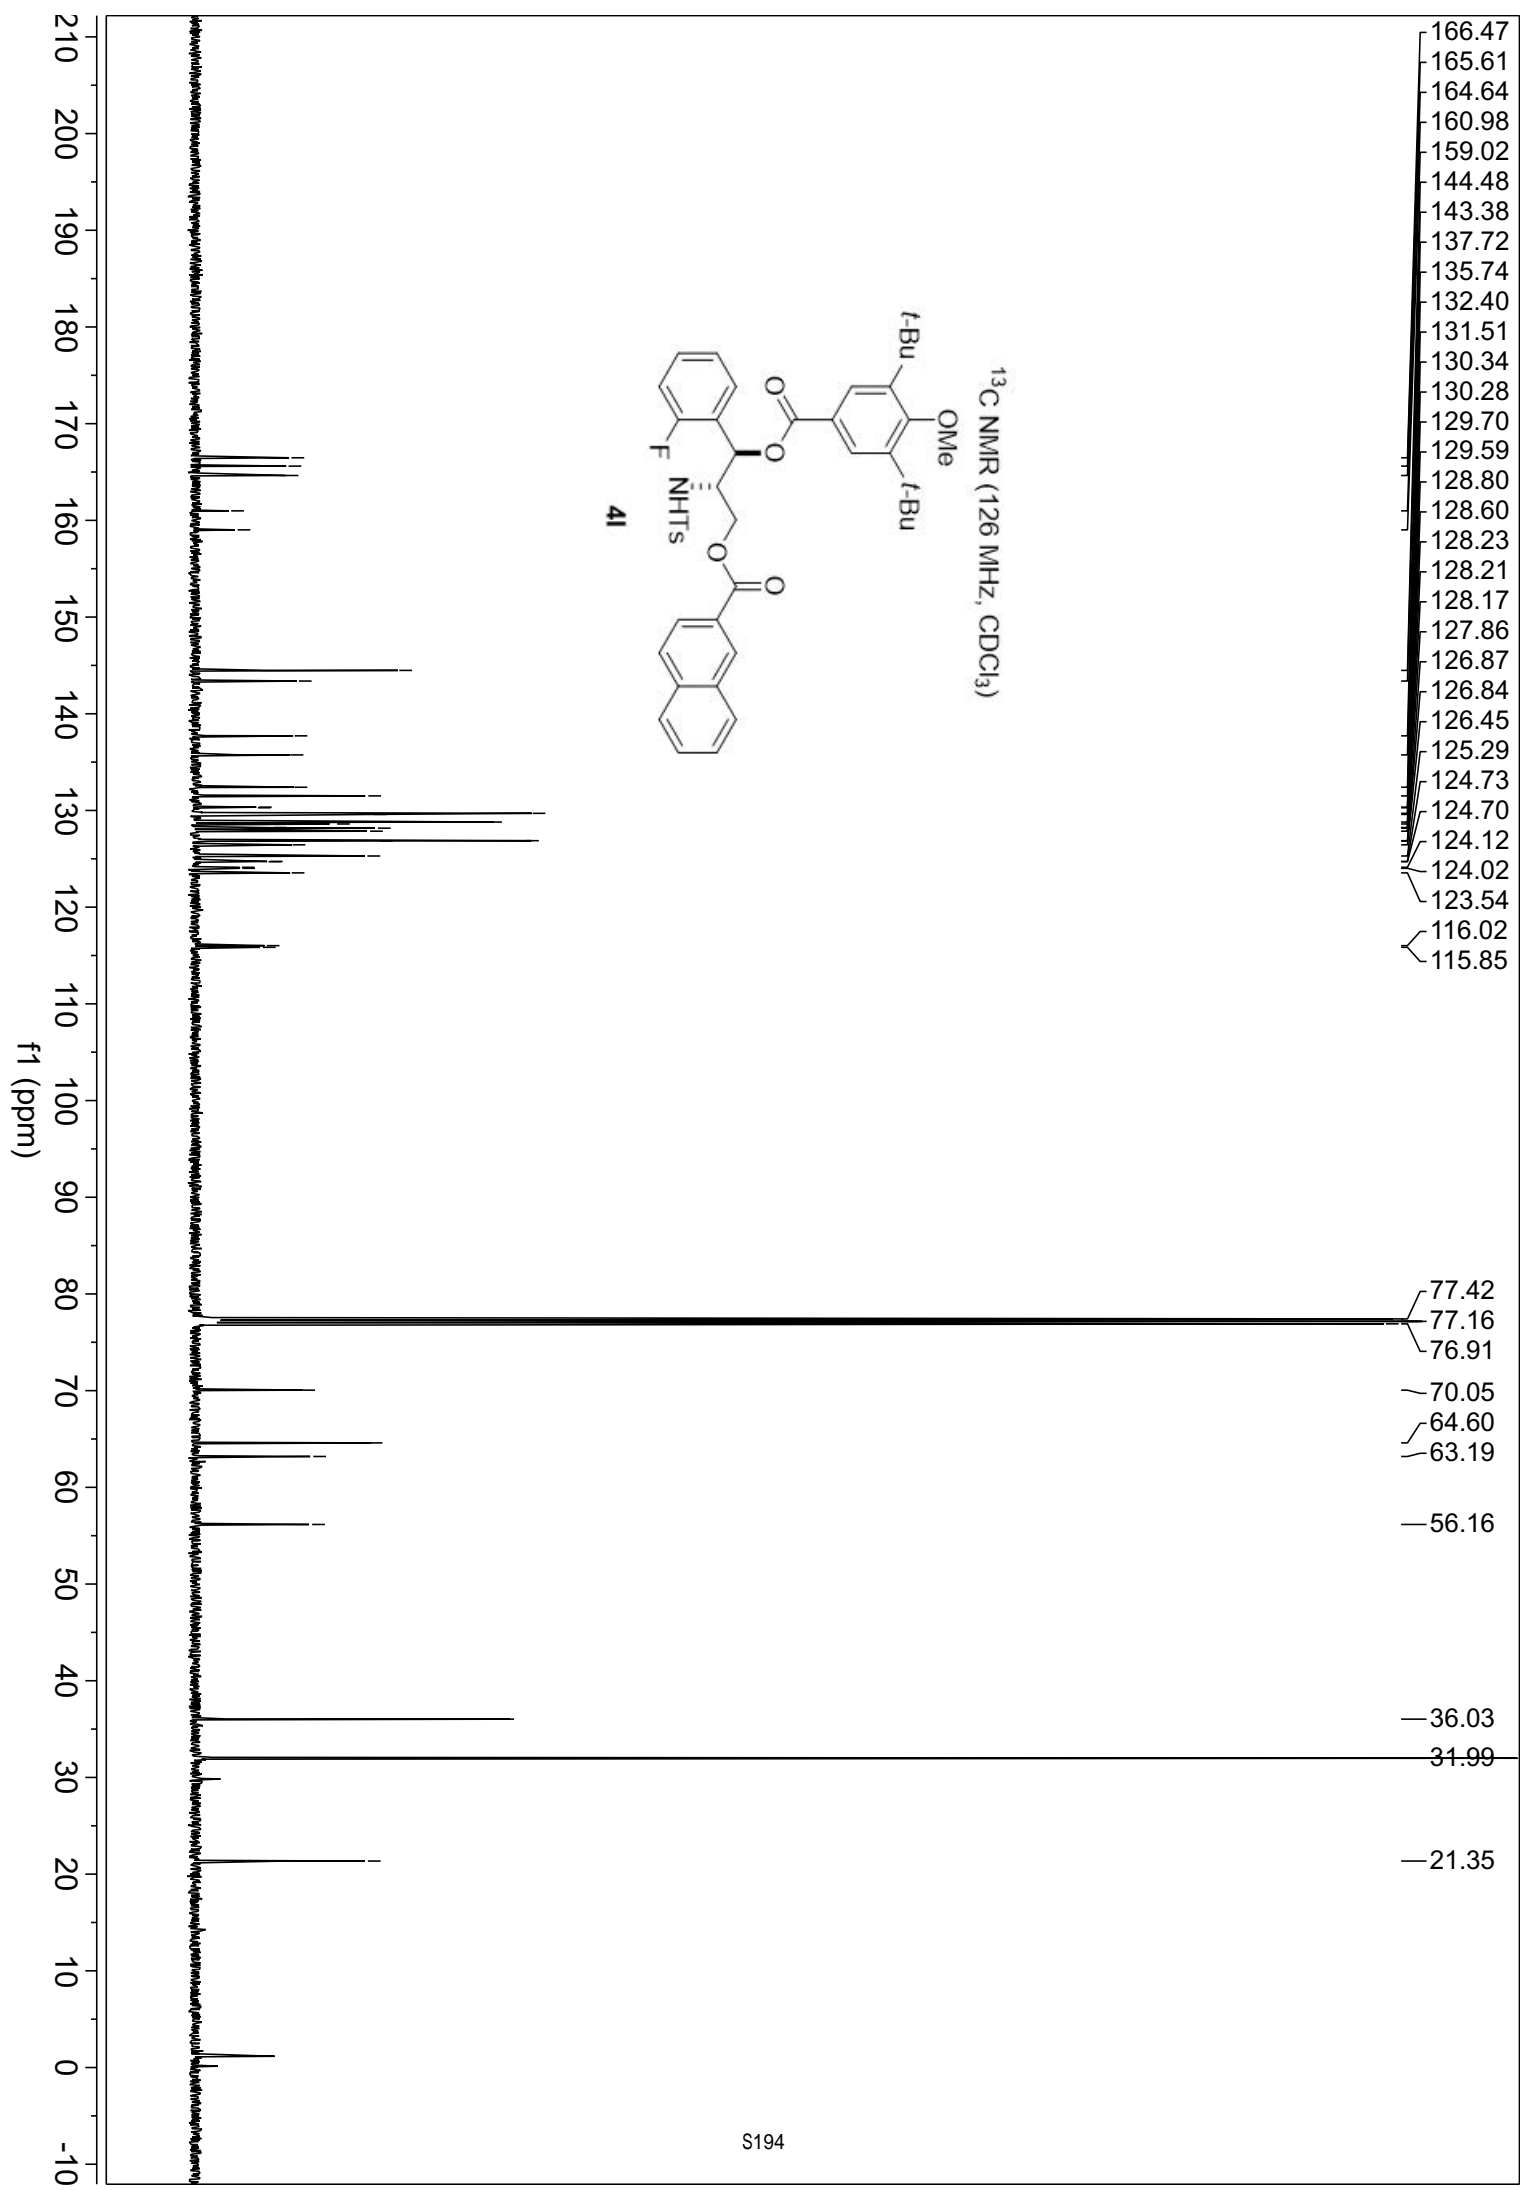

— -116.22

<sup>19</sup>F NMR (471 MHz, CDCl<sub>3</sub>)

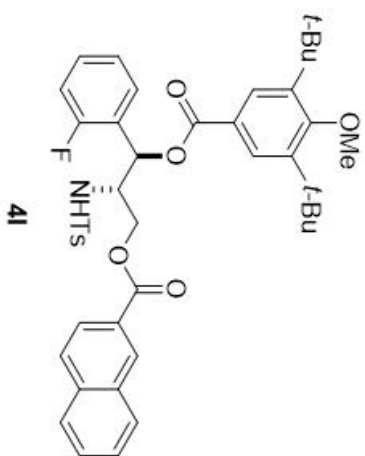

20 10 0 -10 -20 -30 -40 -50 -60 -70 -80 -90 -100 -110 -120 -130 -140 -150 -160 -170 -180 -190 -200 -210 -220  
f1 (ppm)

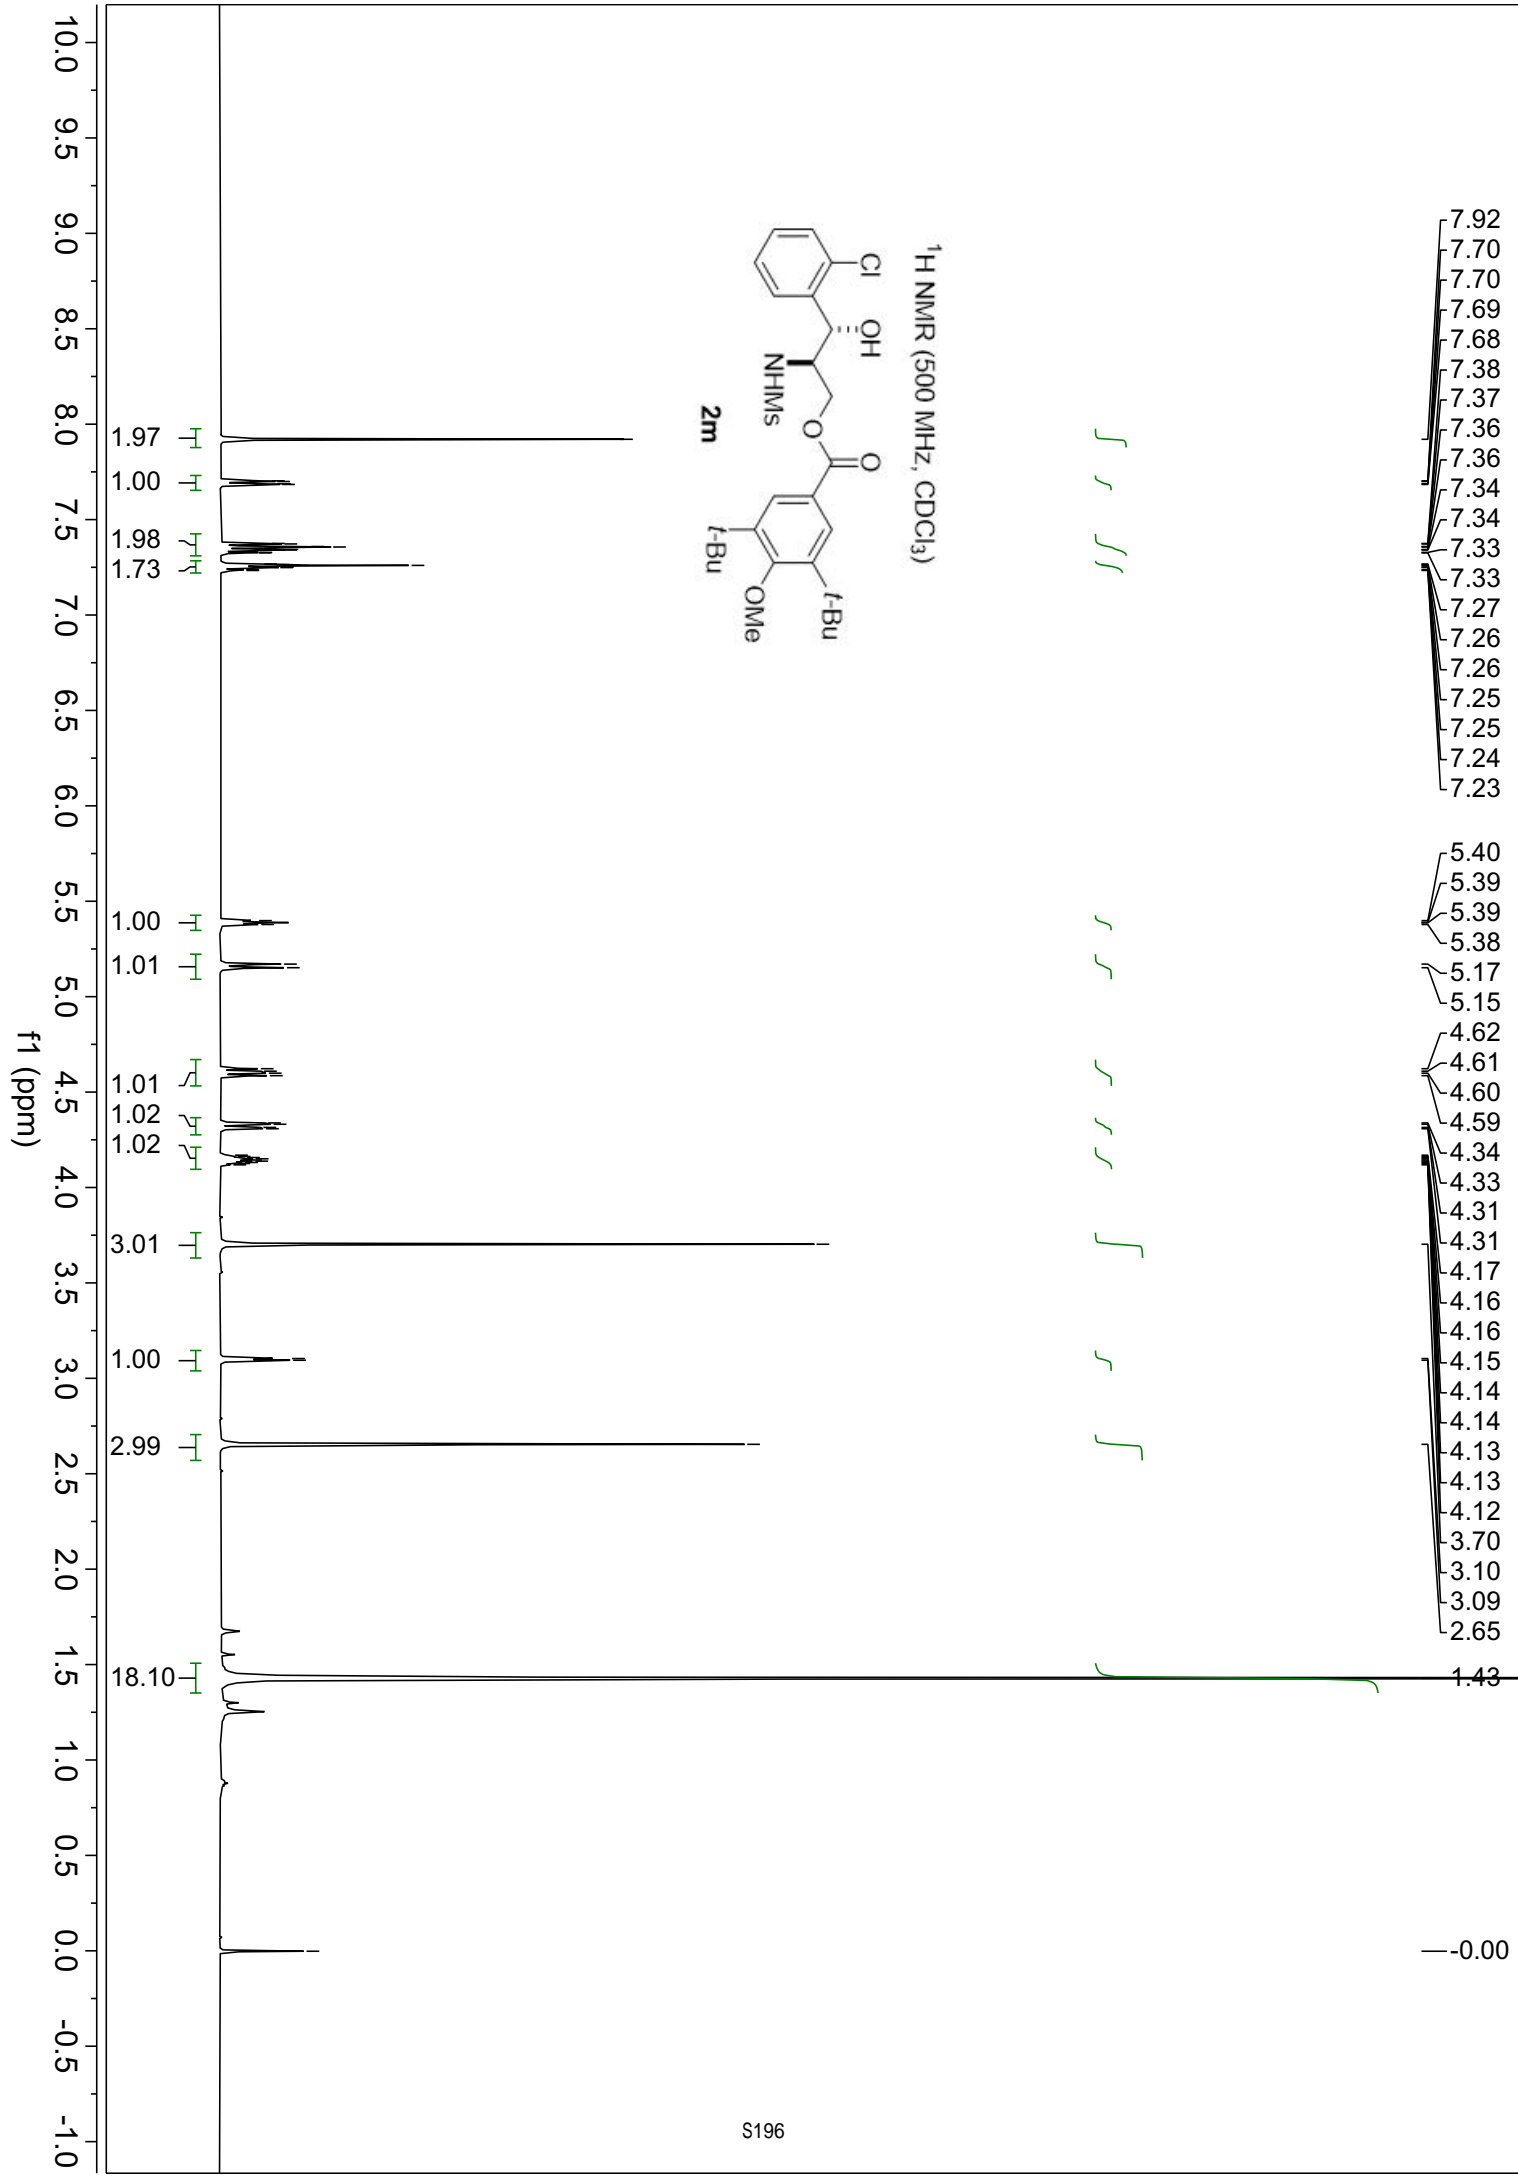

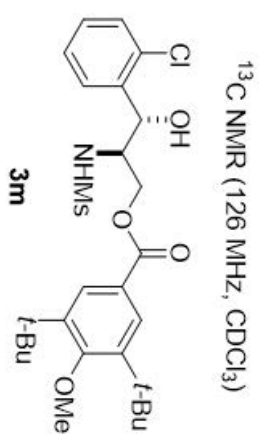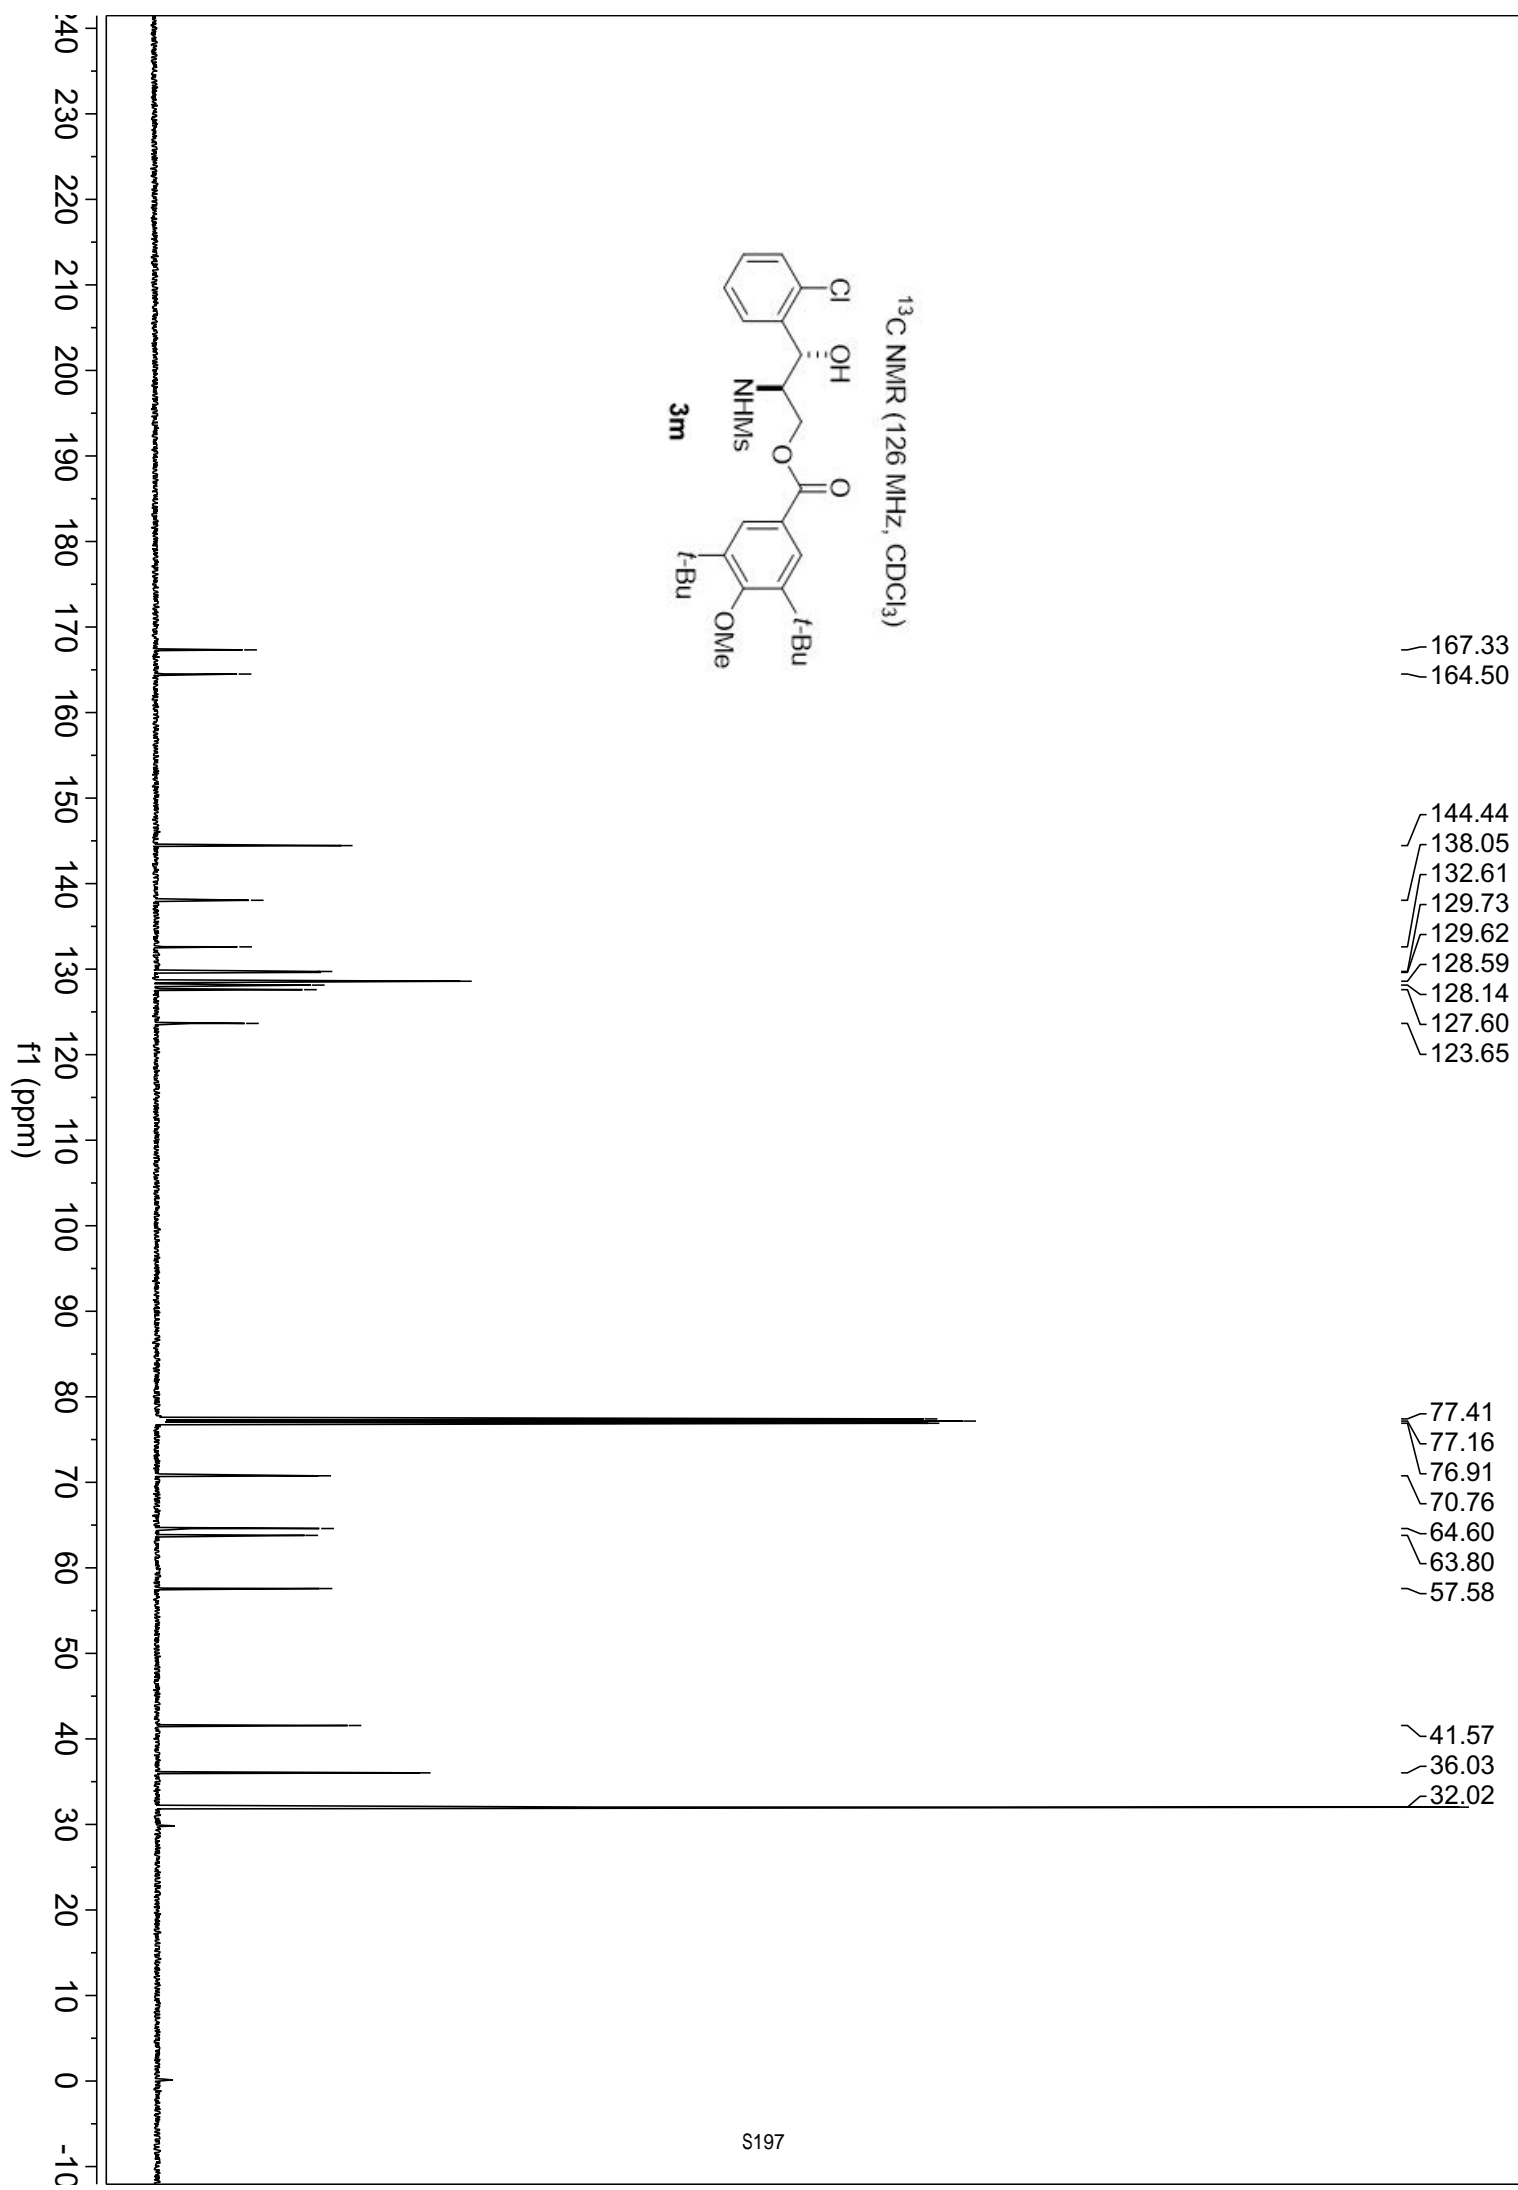

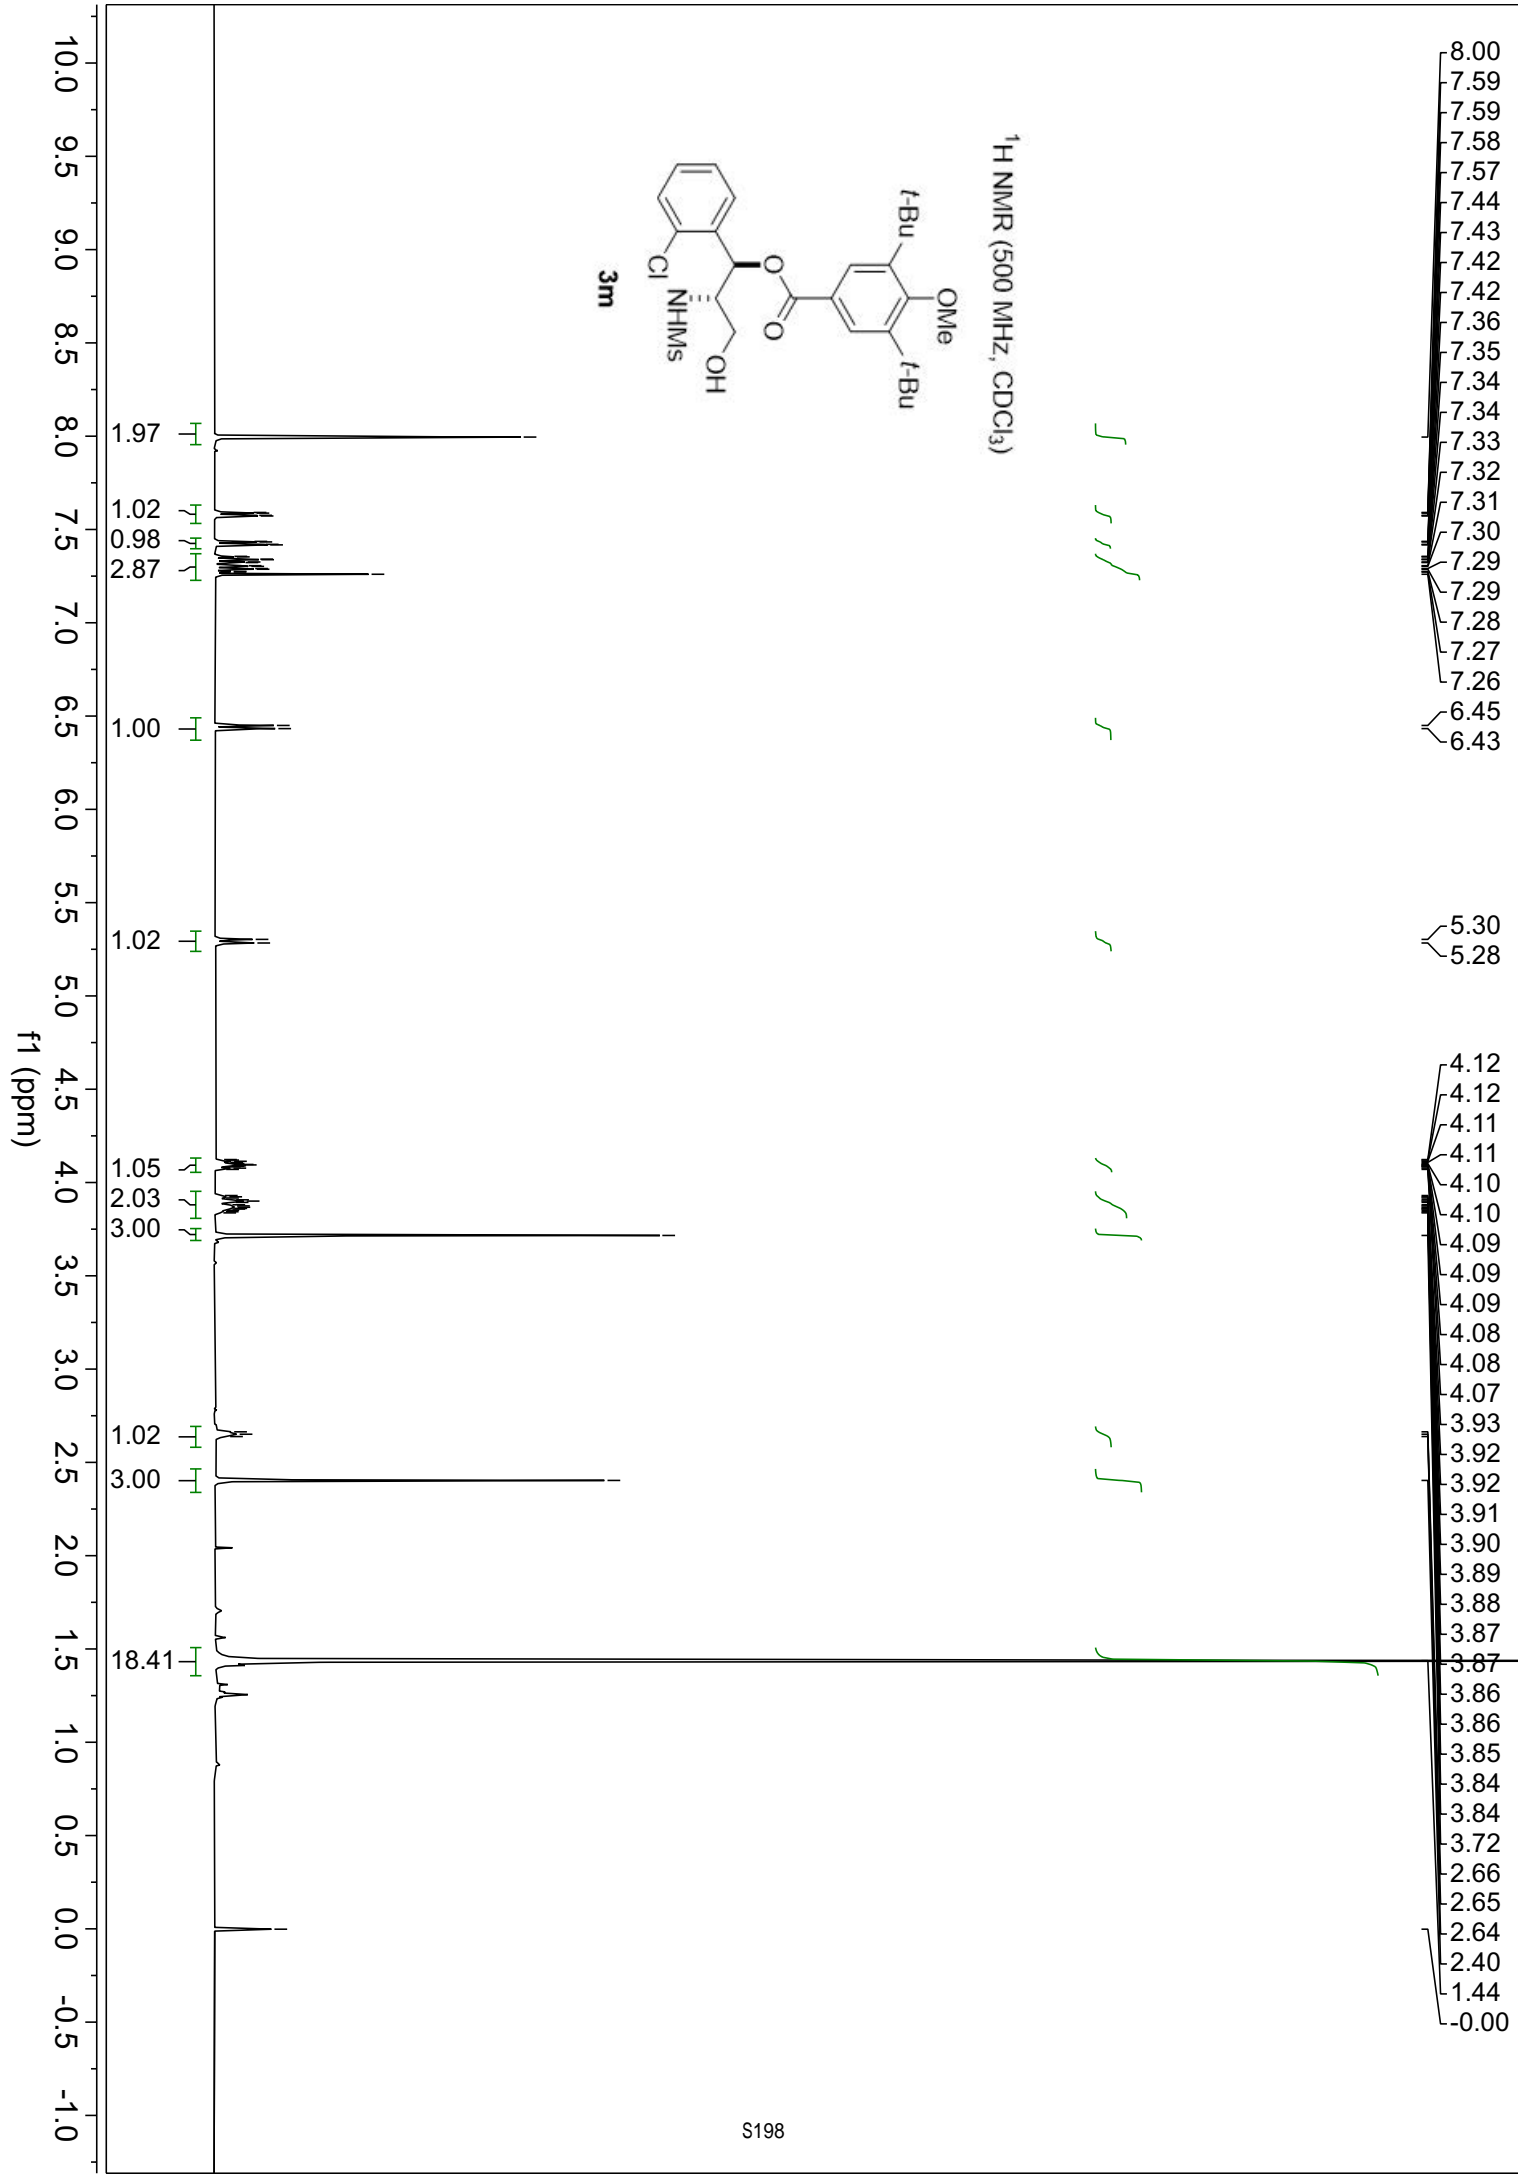

<sup>13</sup>C NMR (126 MHz, CDCl<sub>3</sub>)

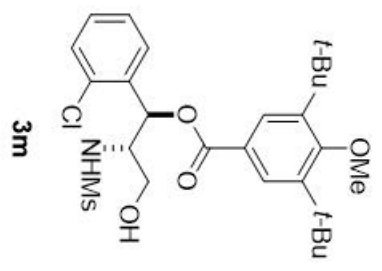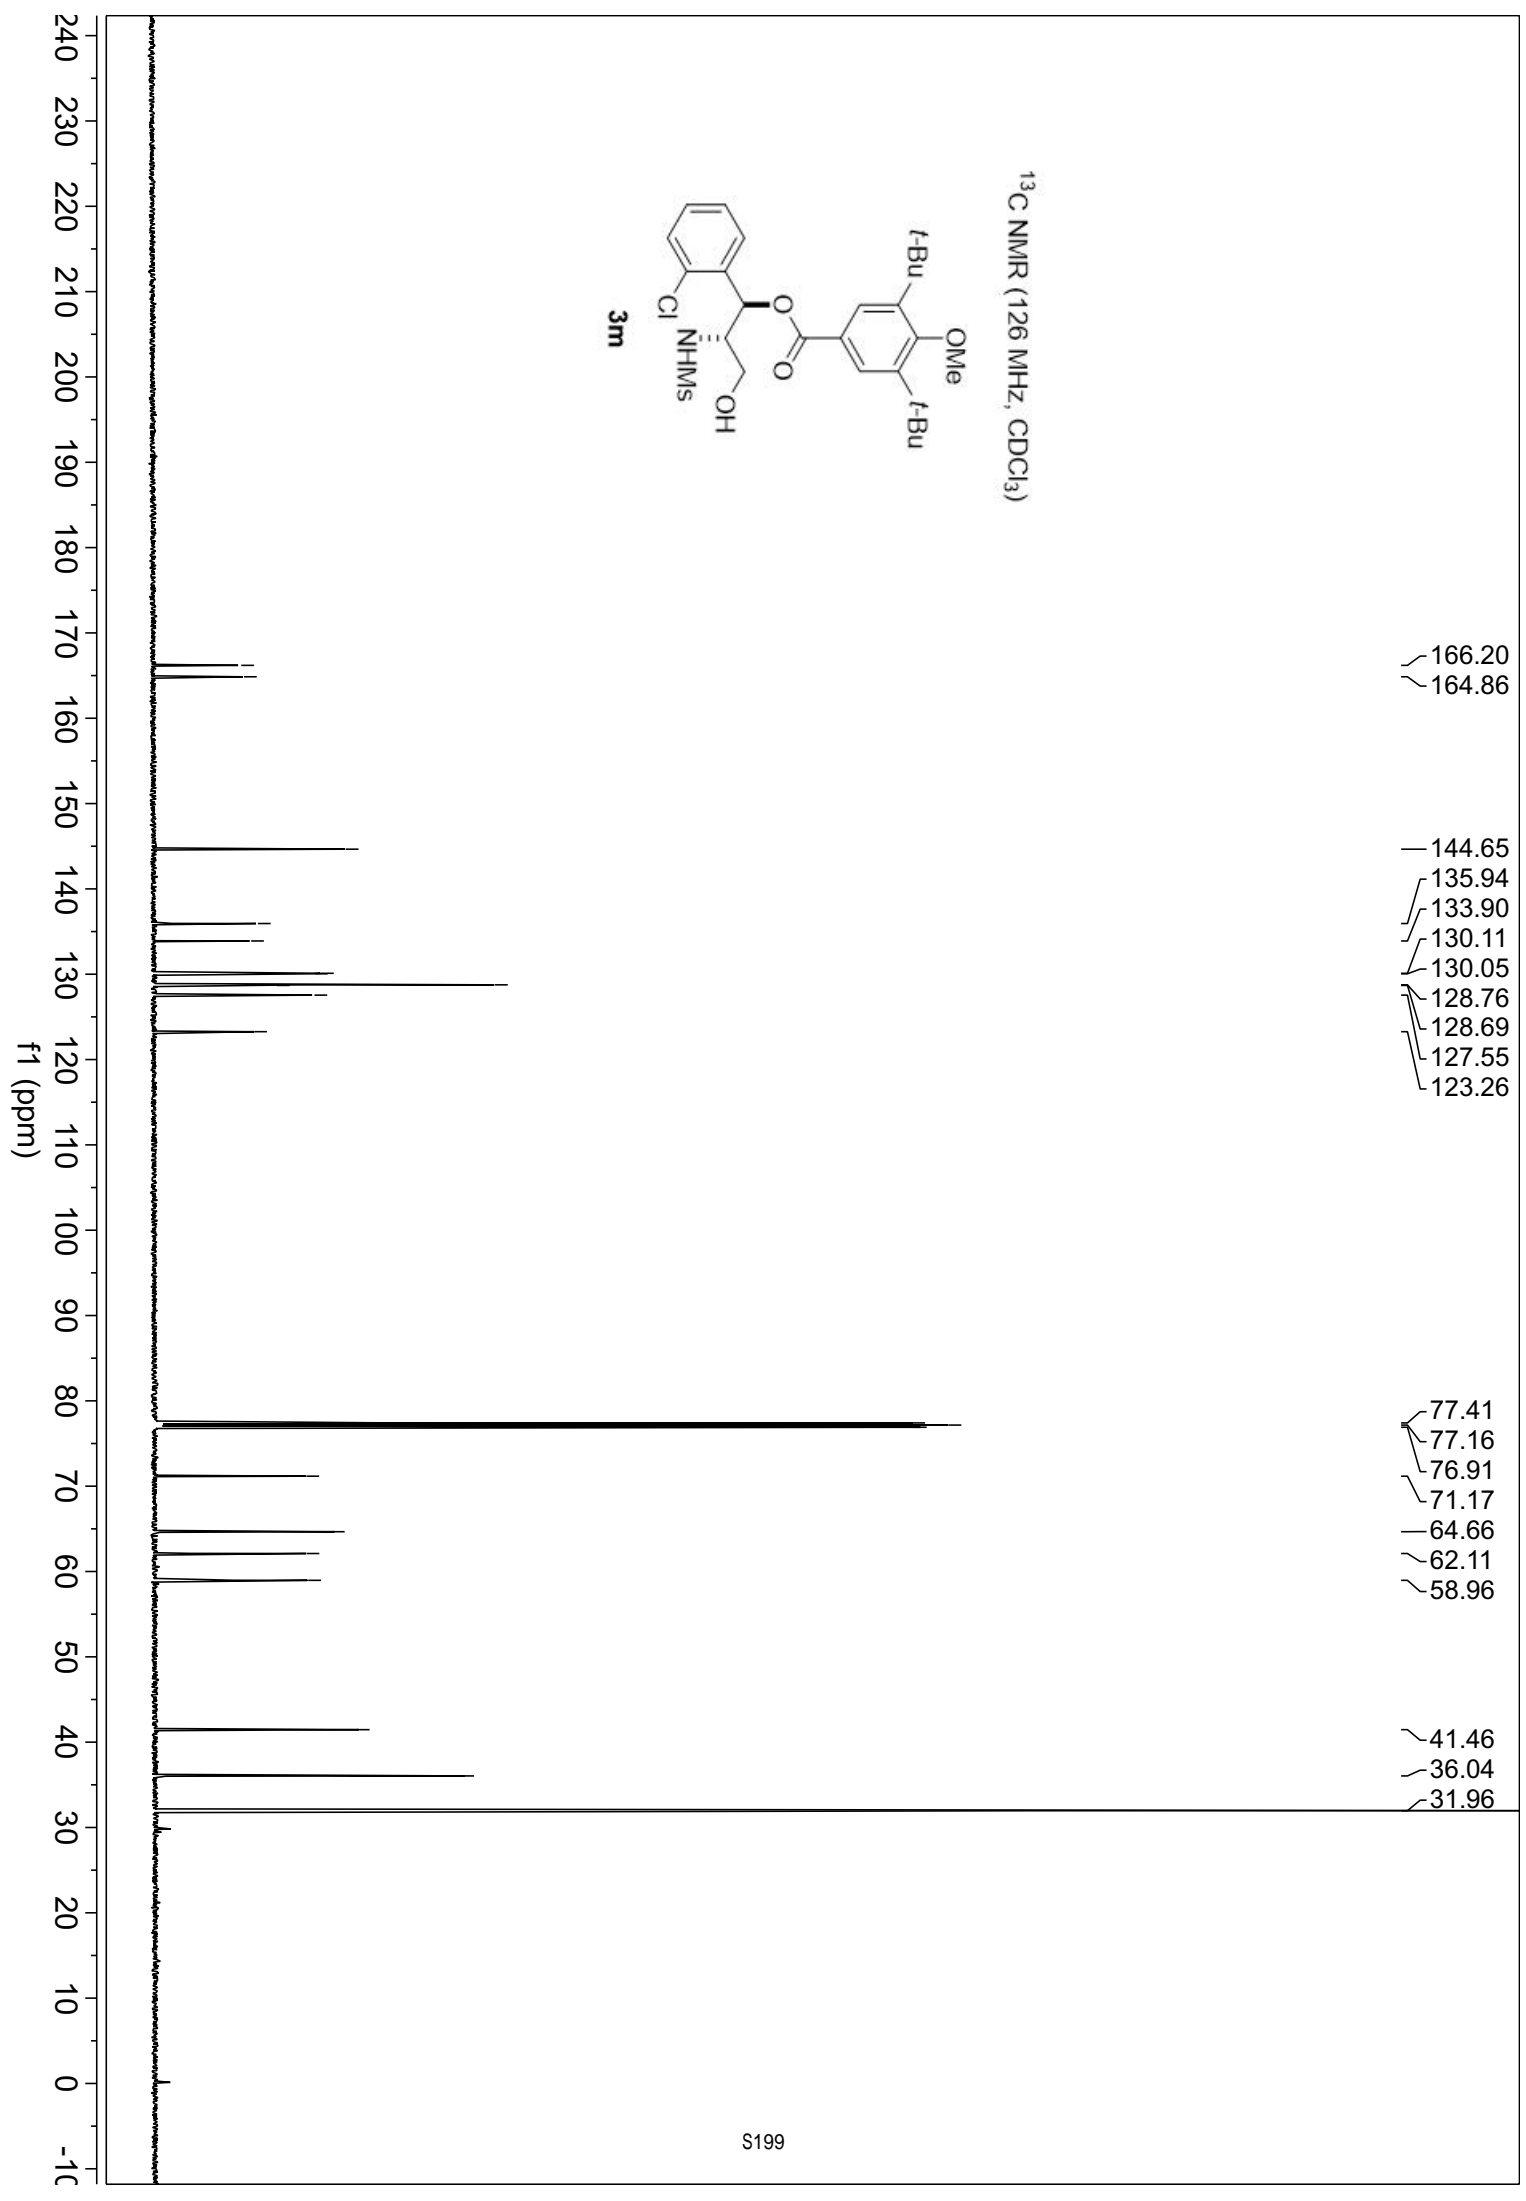

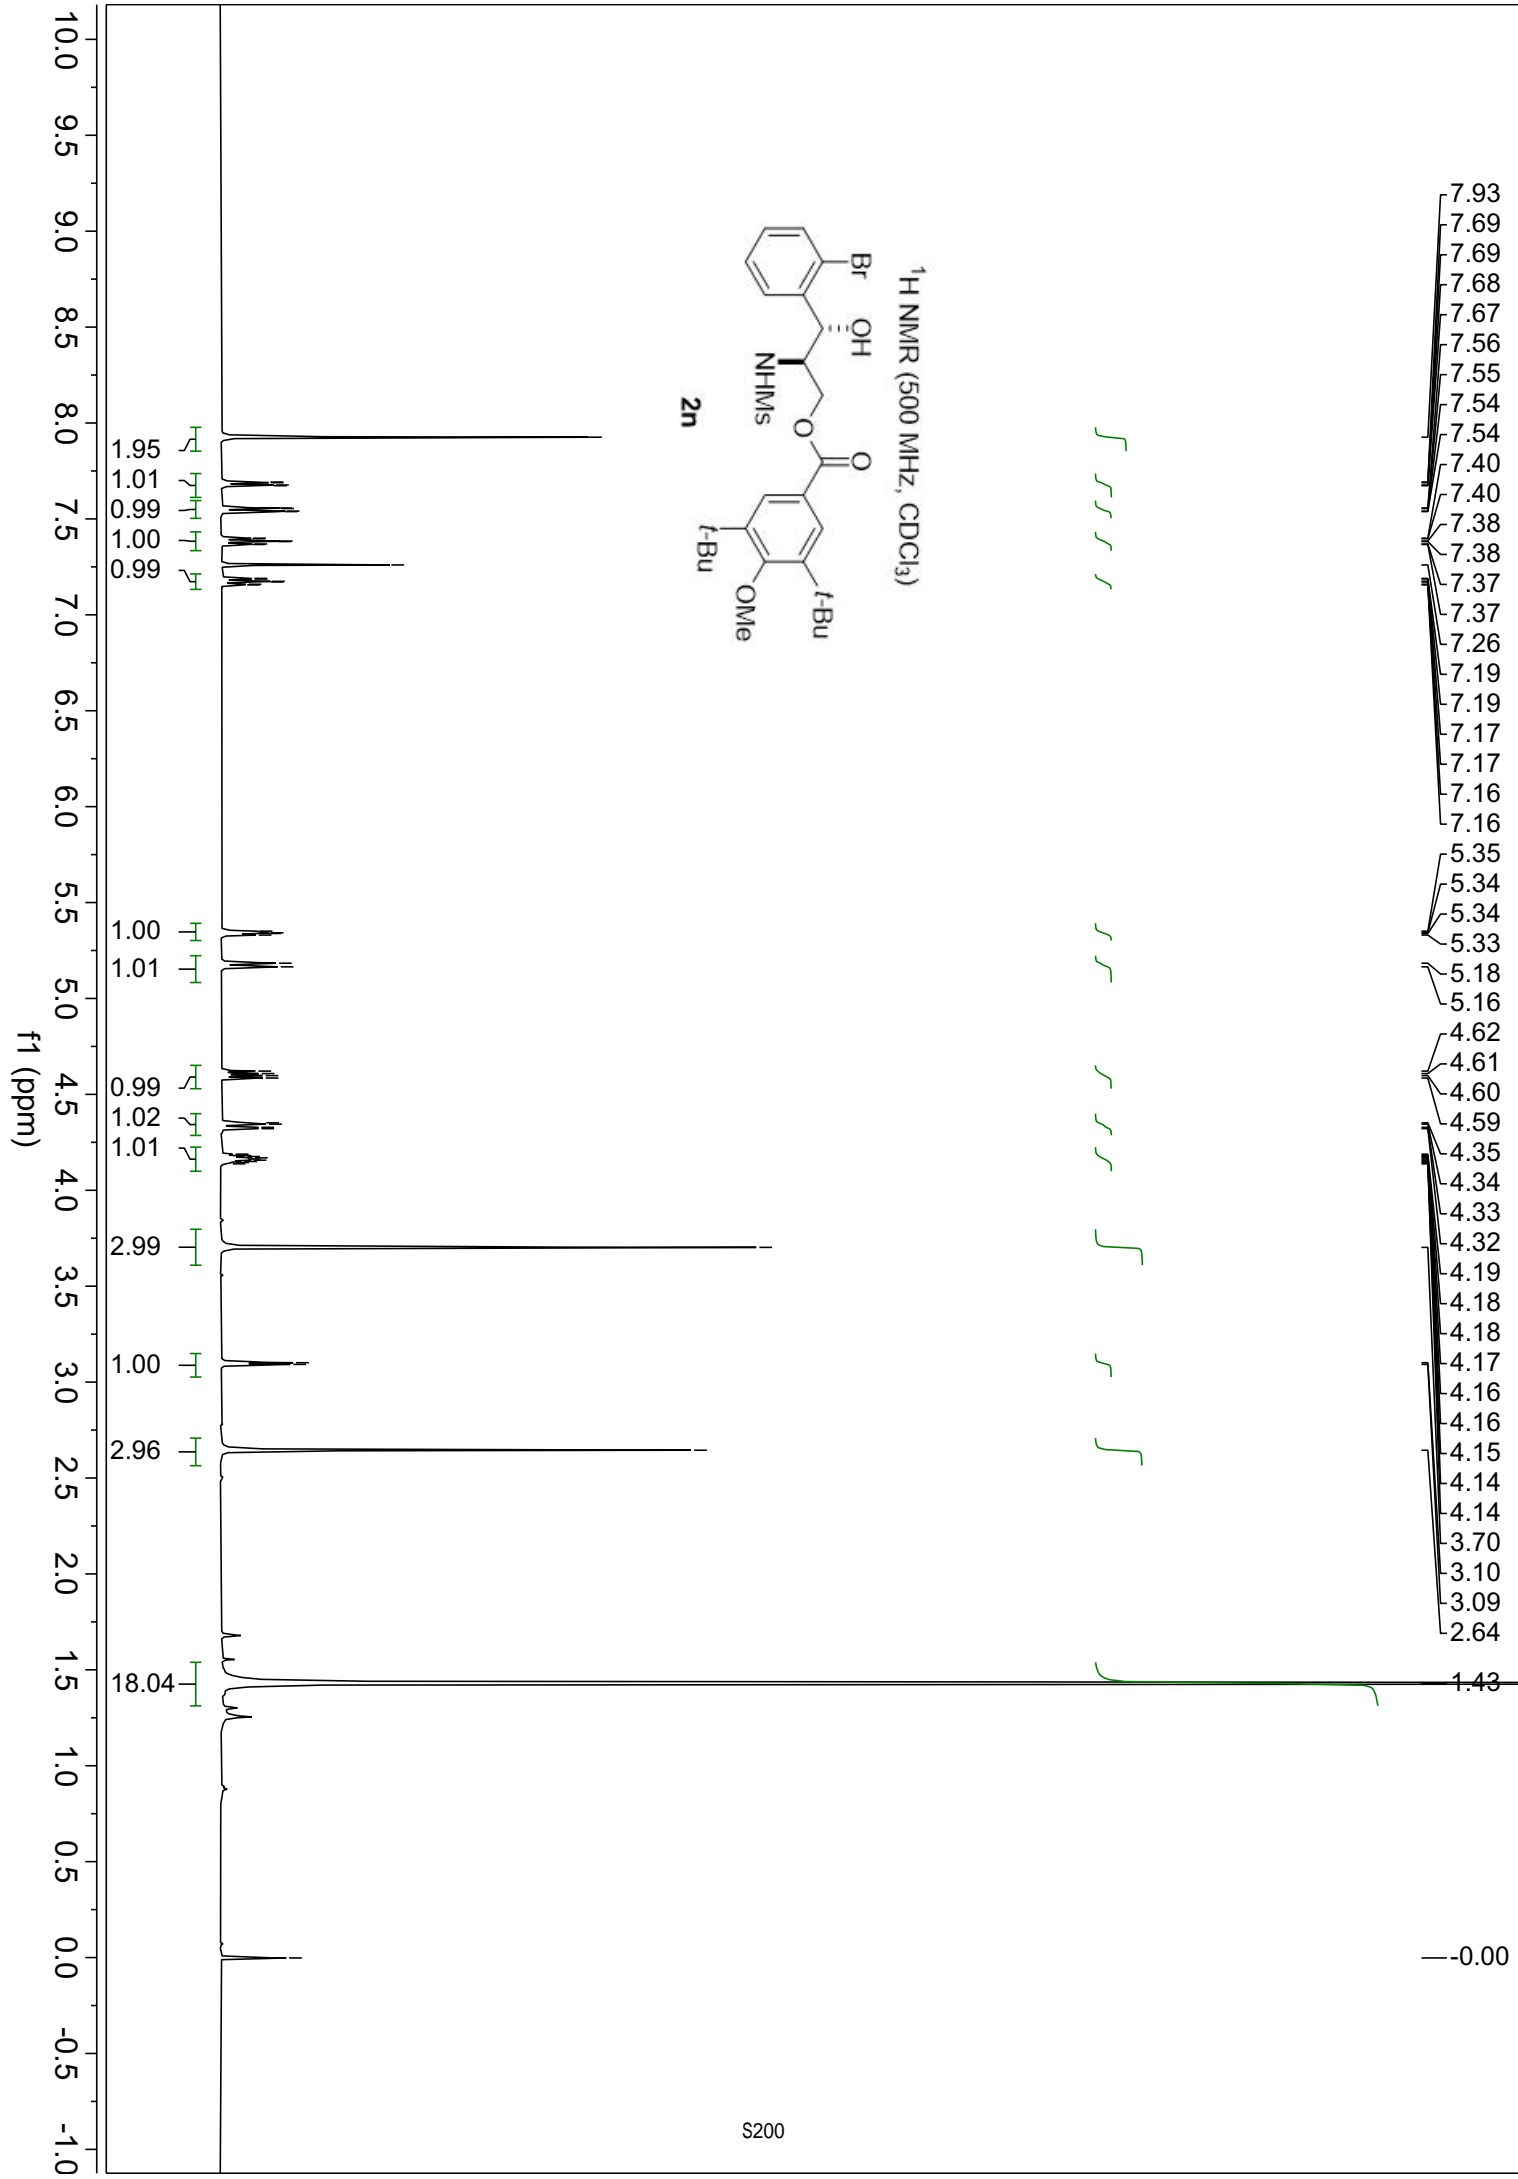



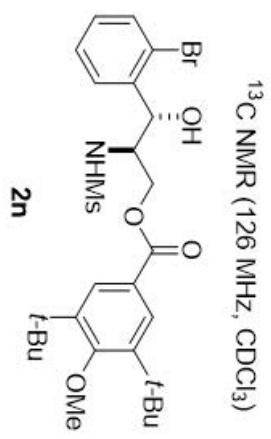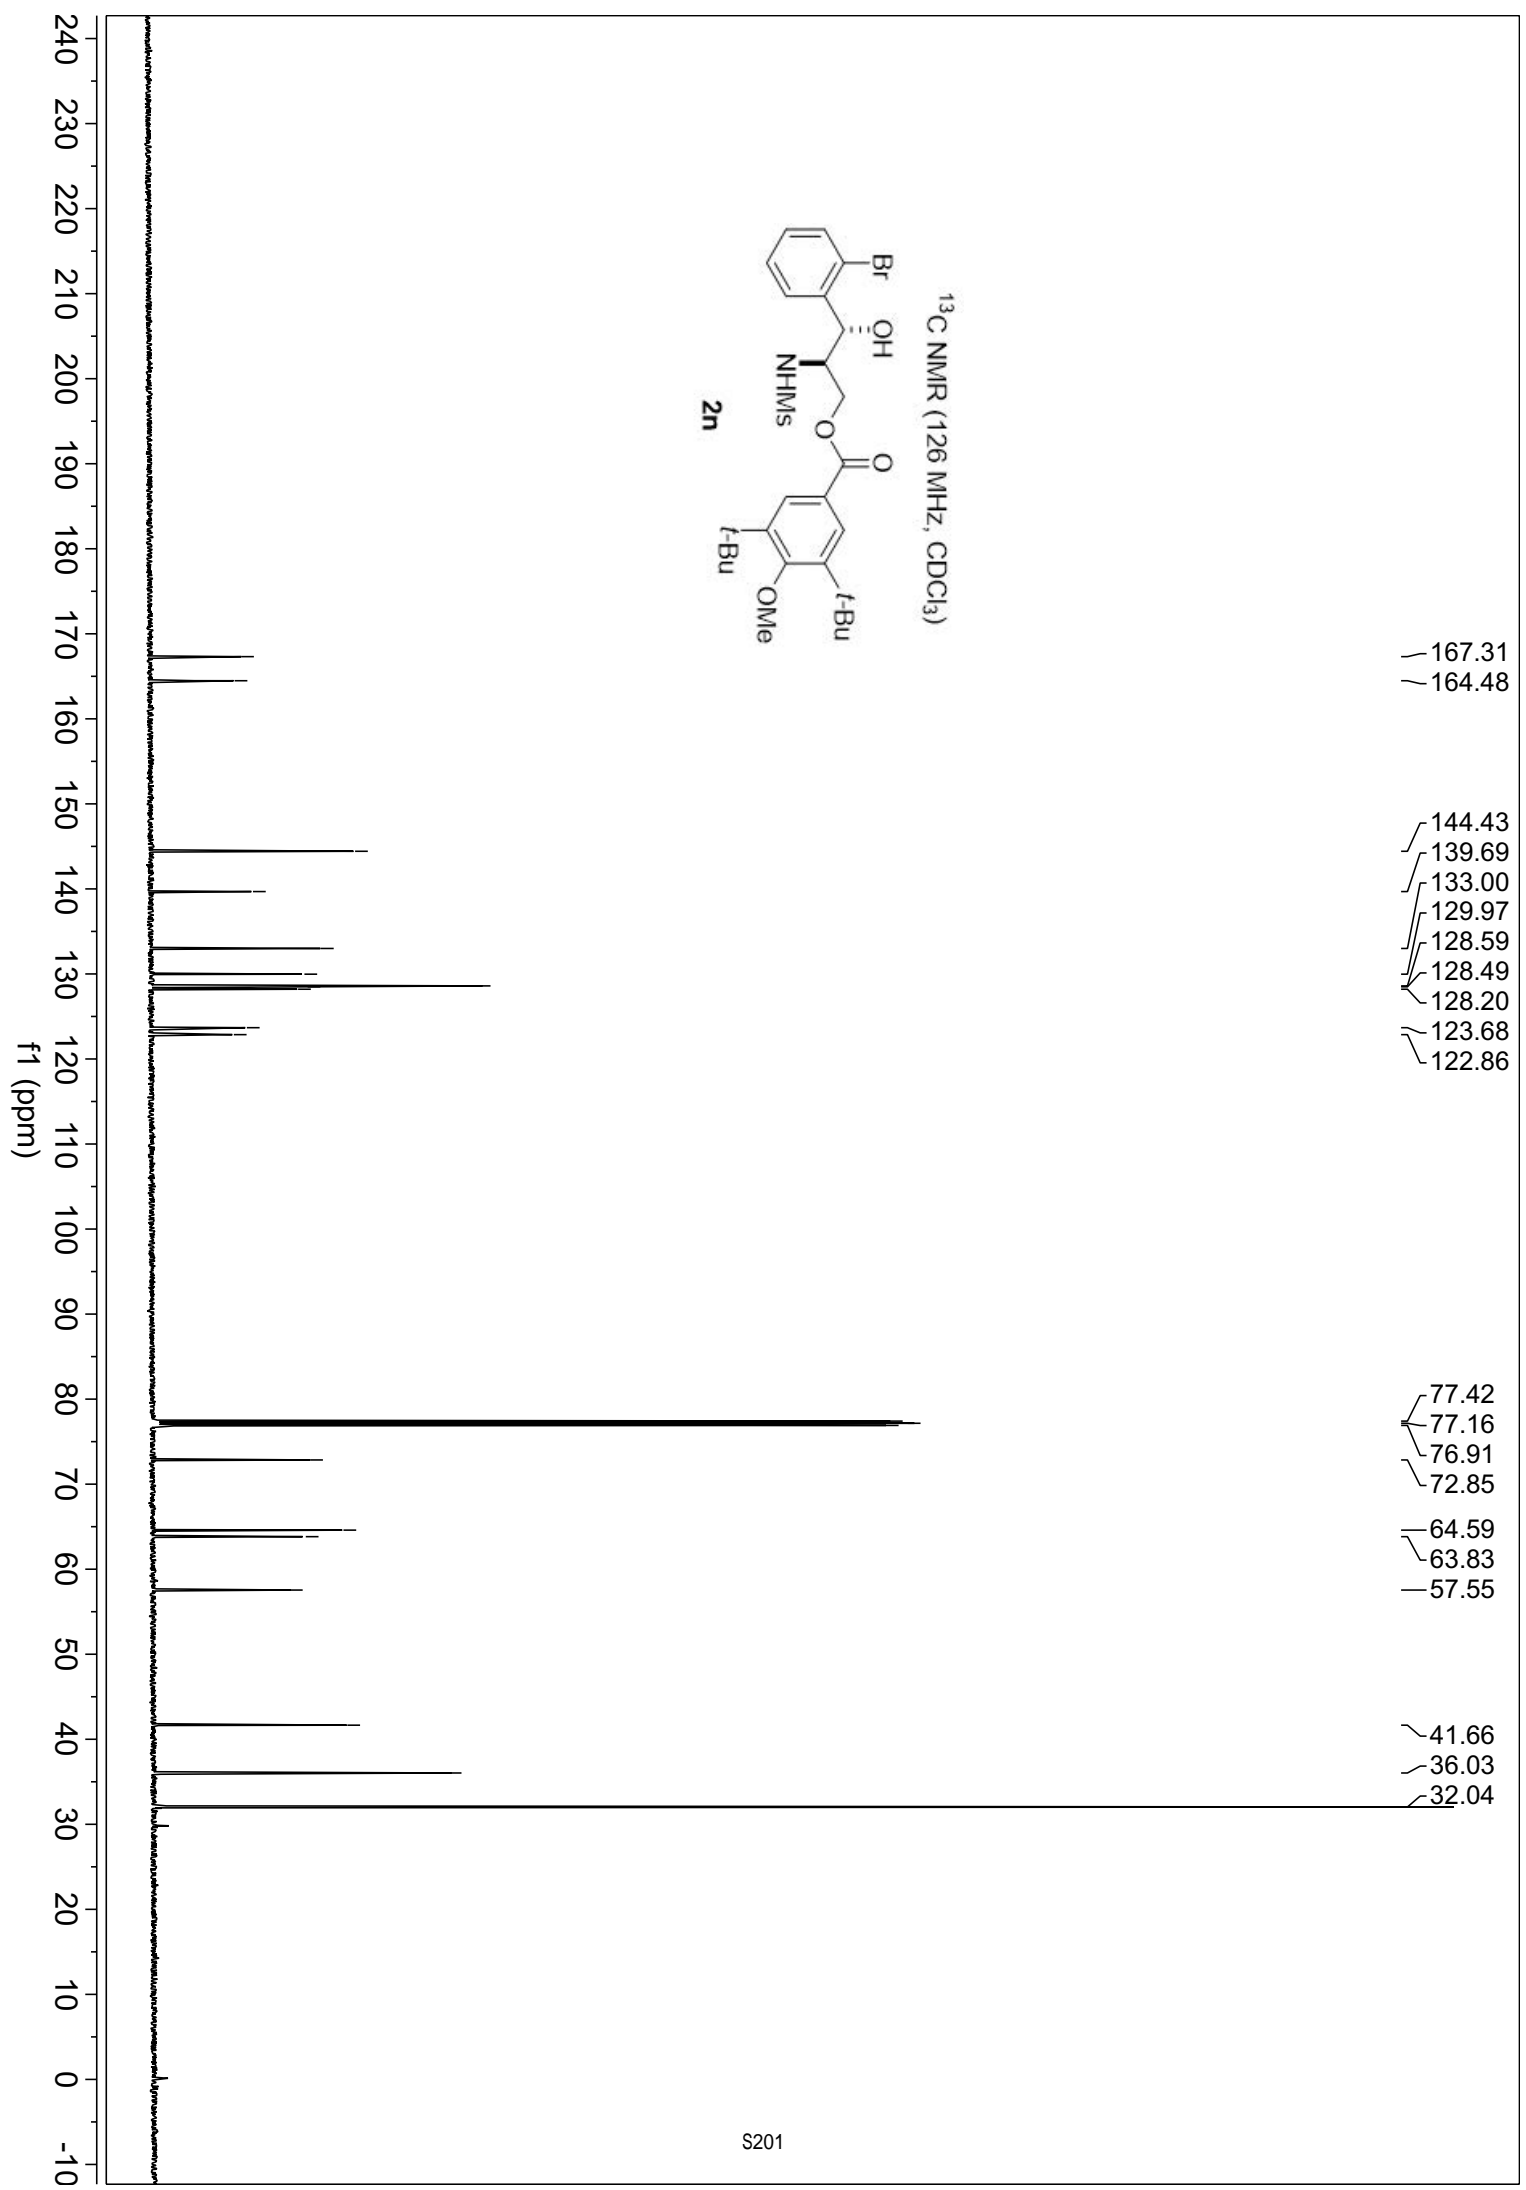

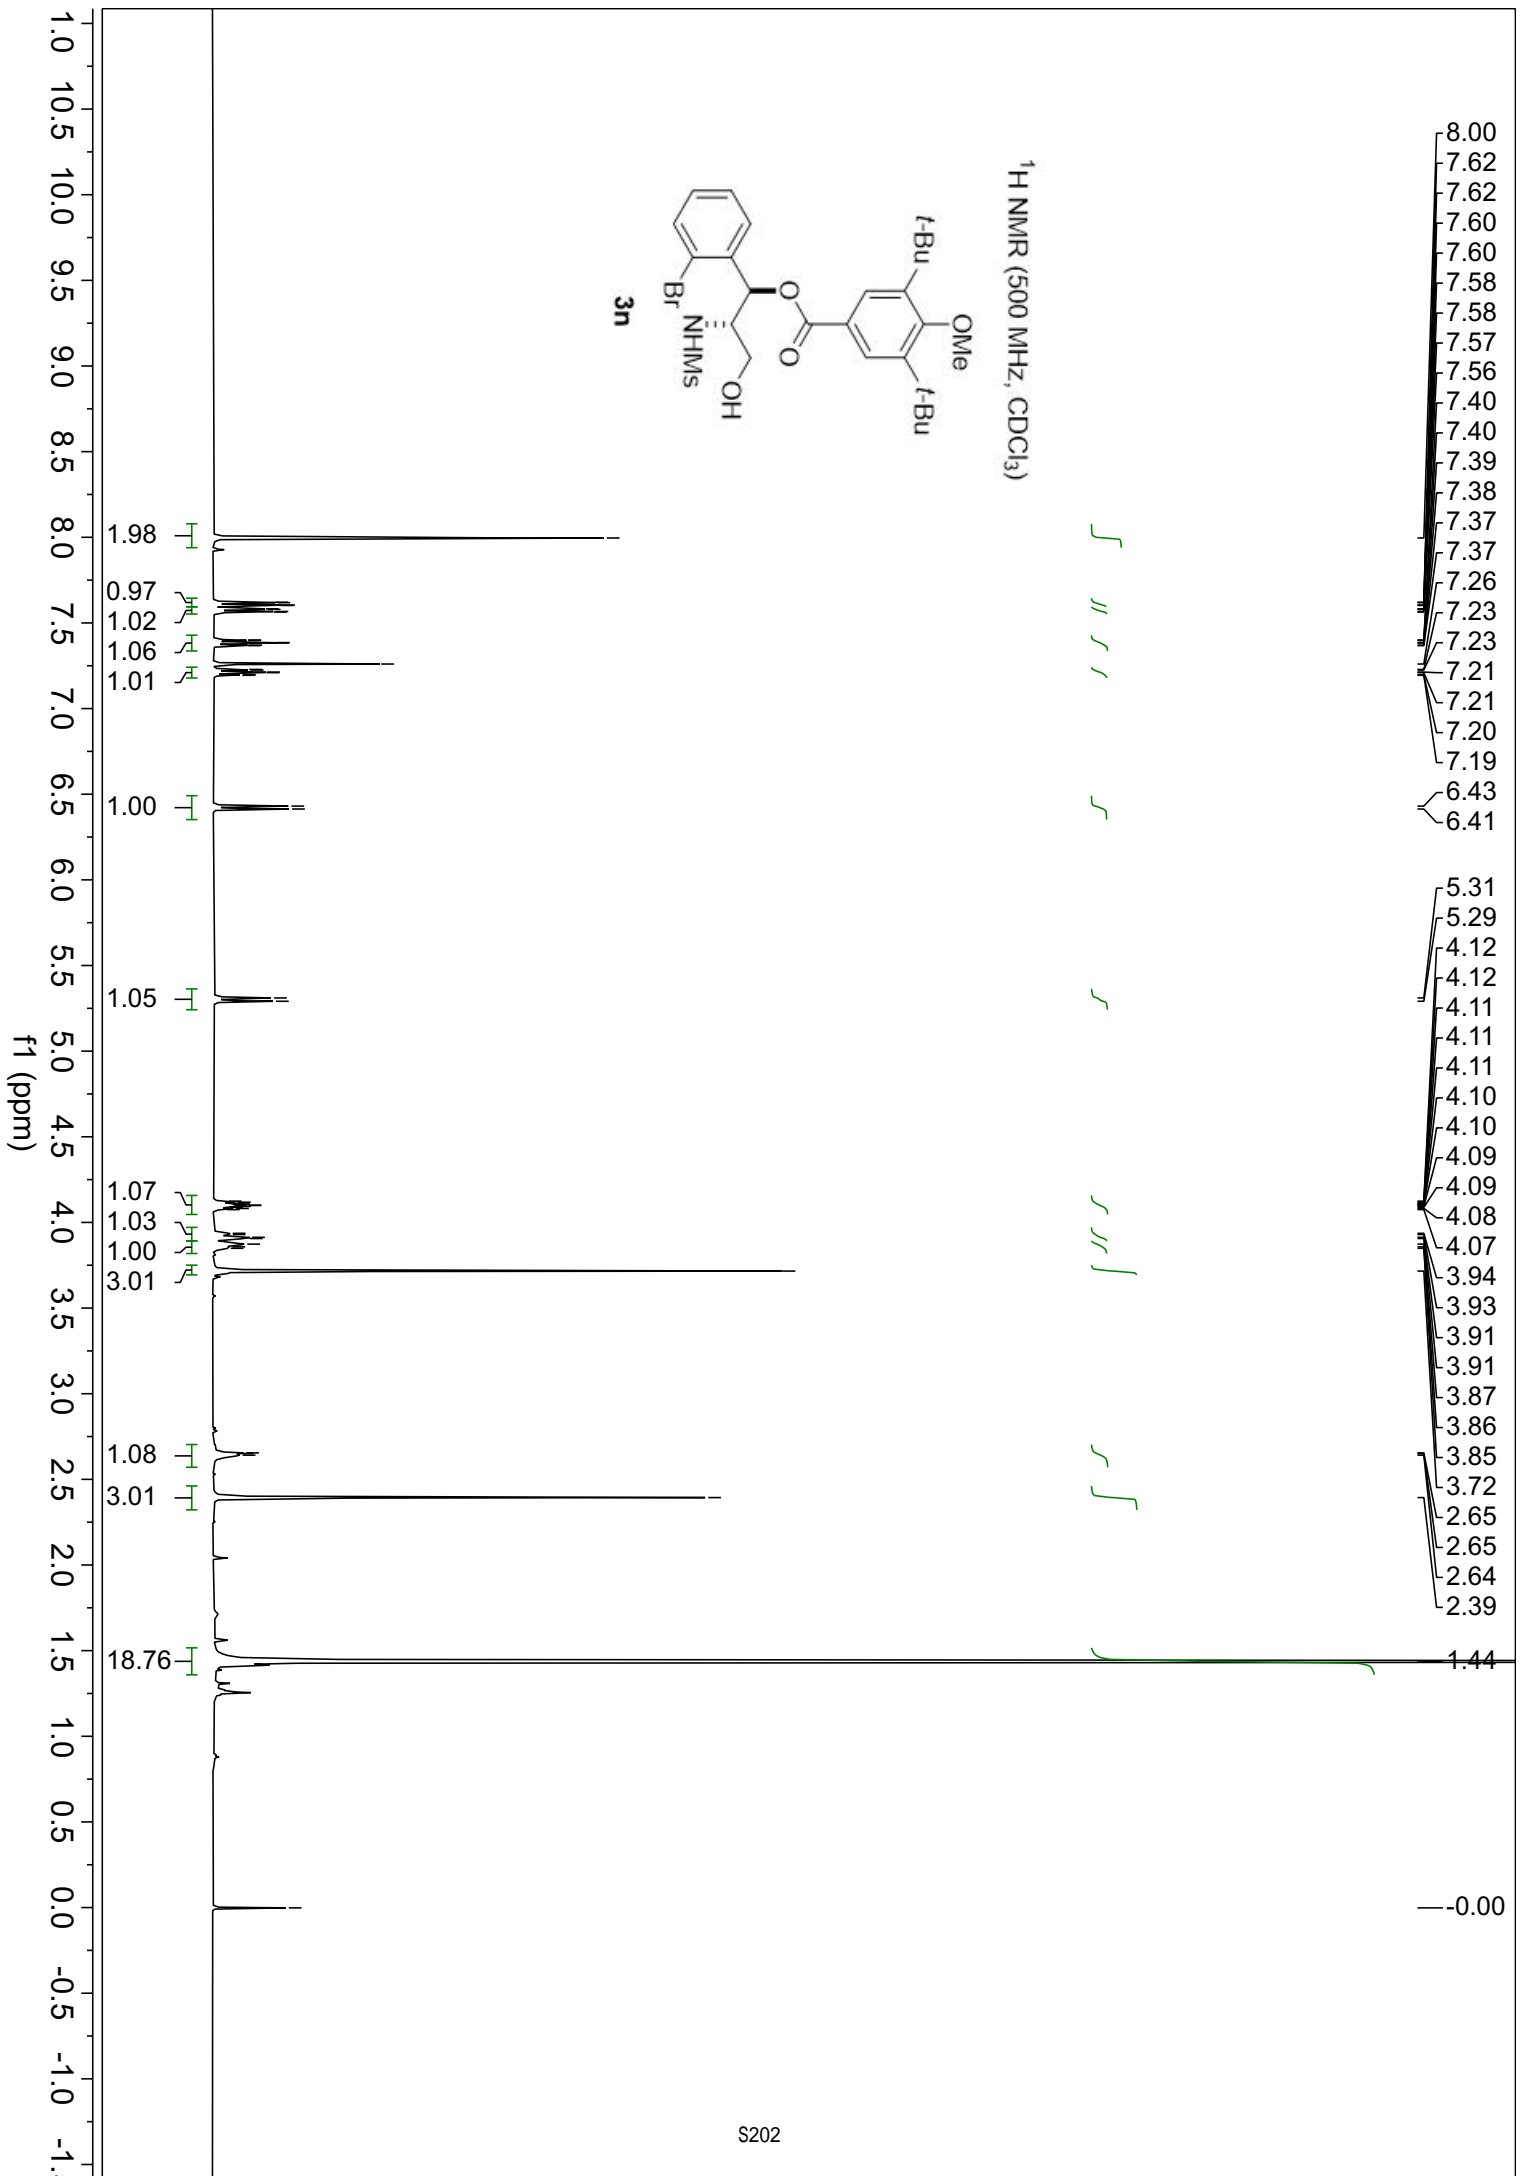

<sup>13</sup>C NMR (126 MHz, CDCl<sub>3</sub>)

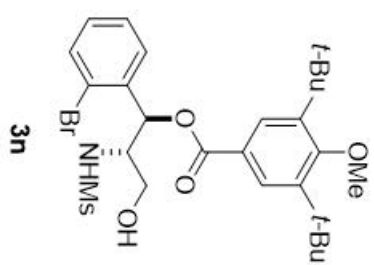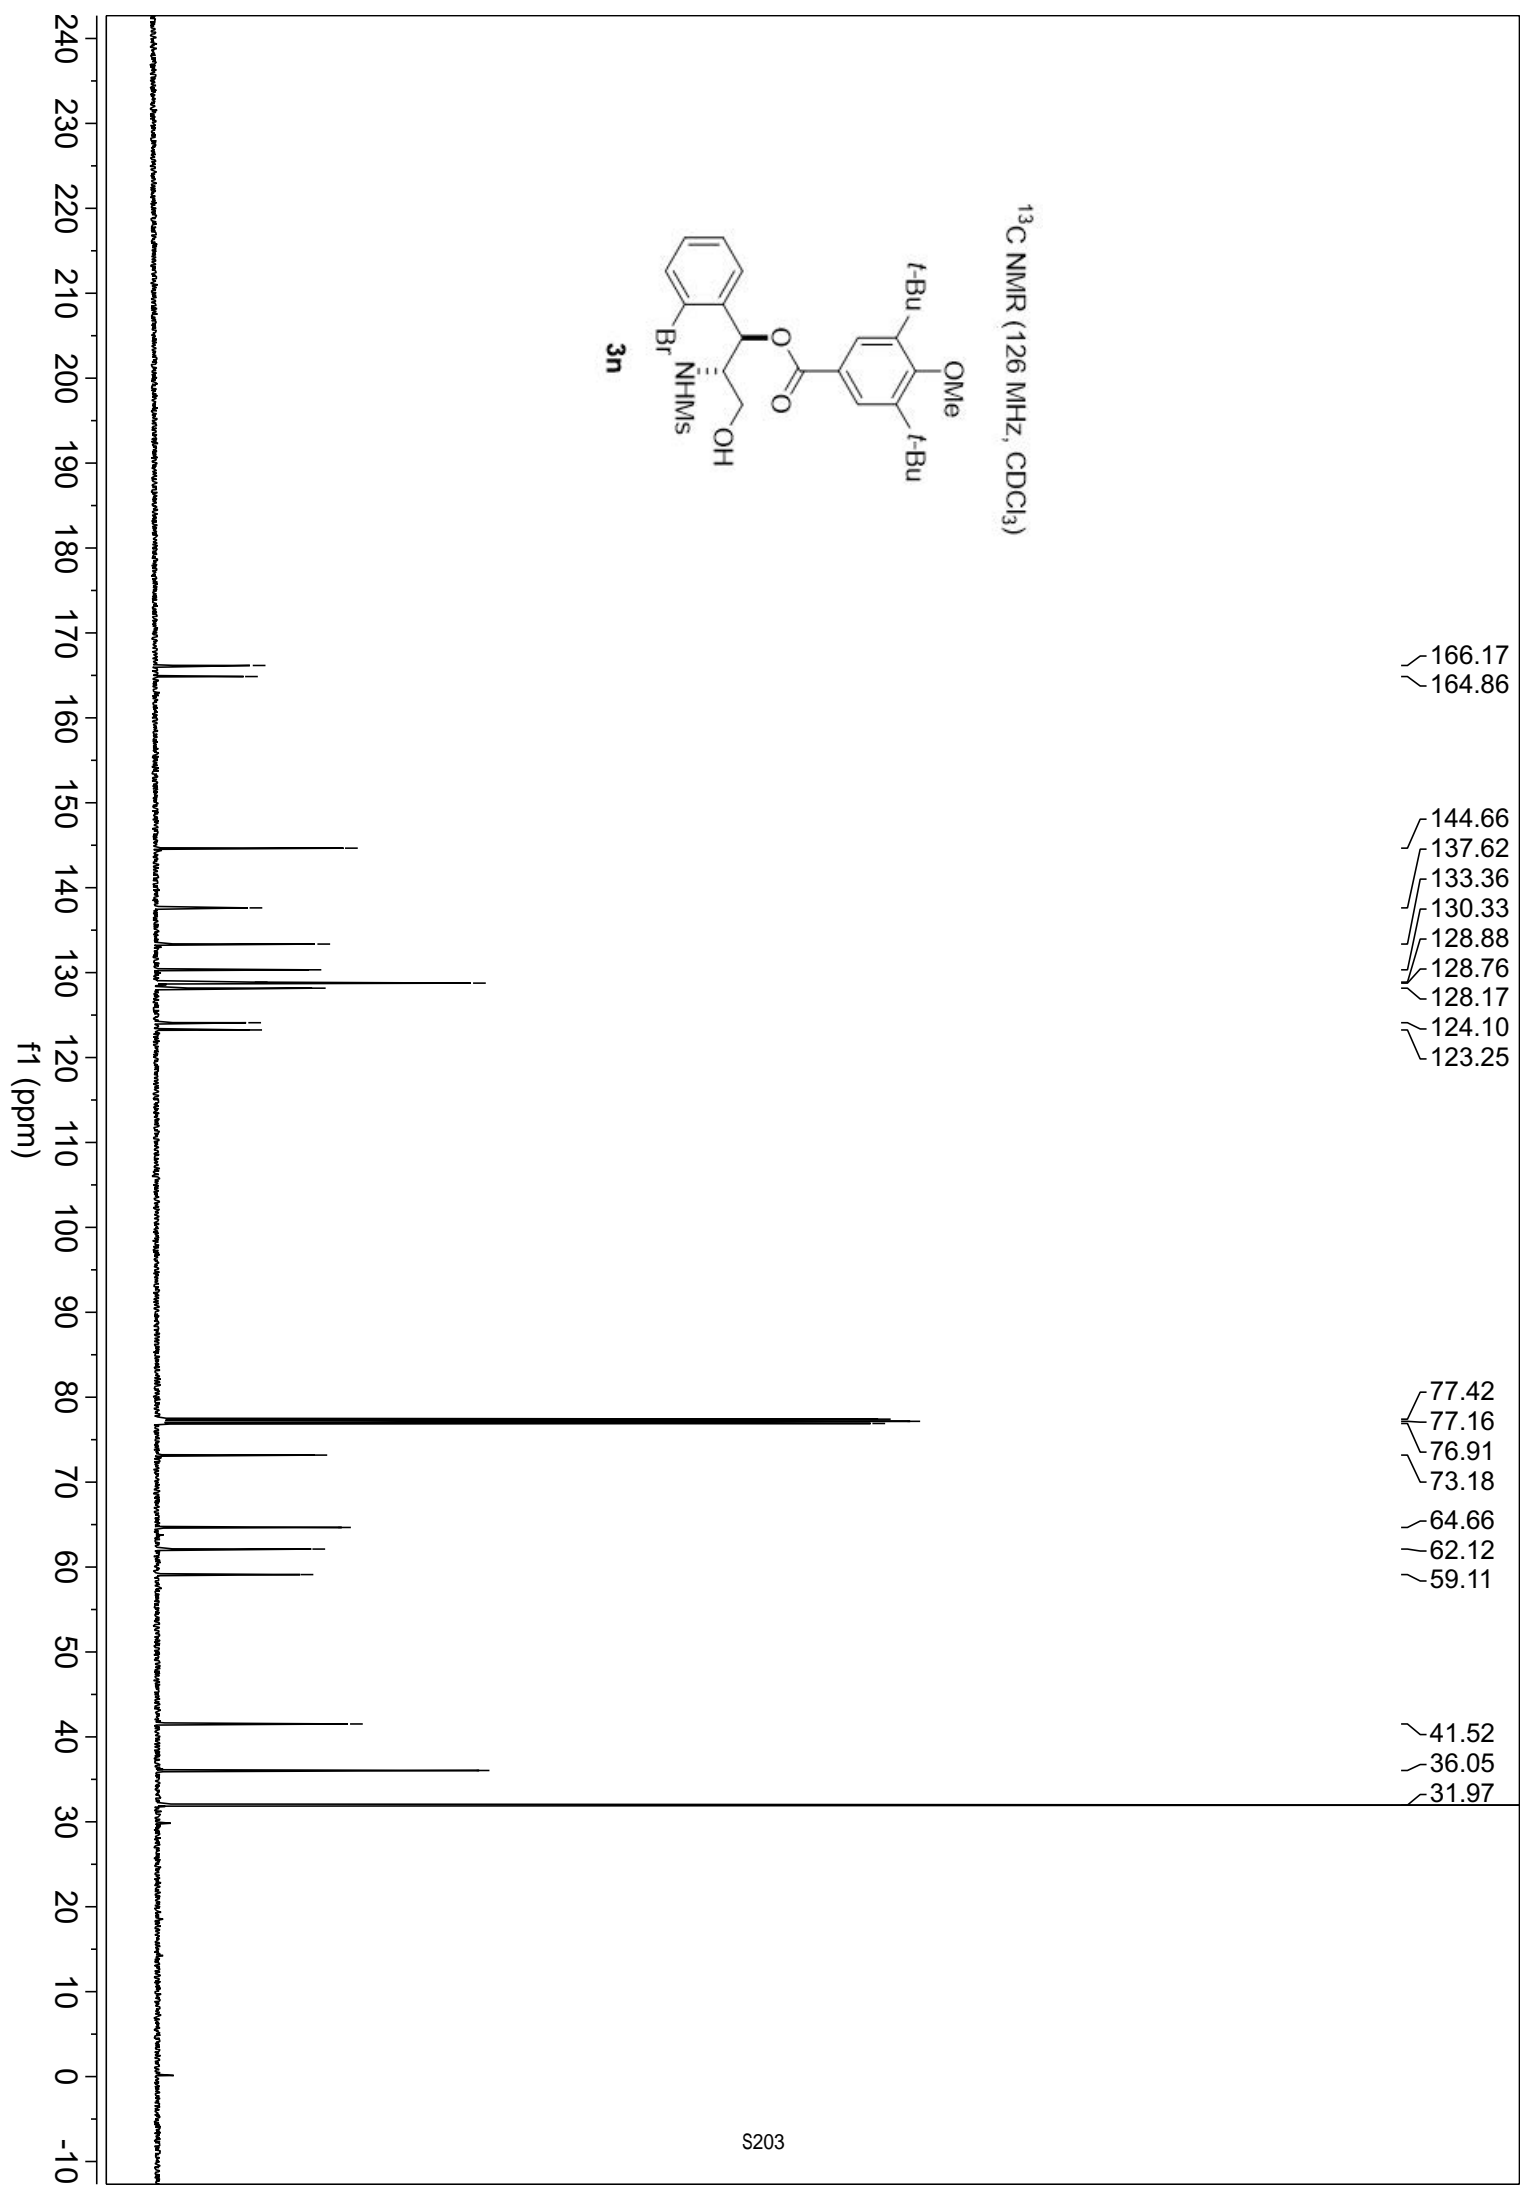

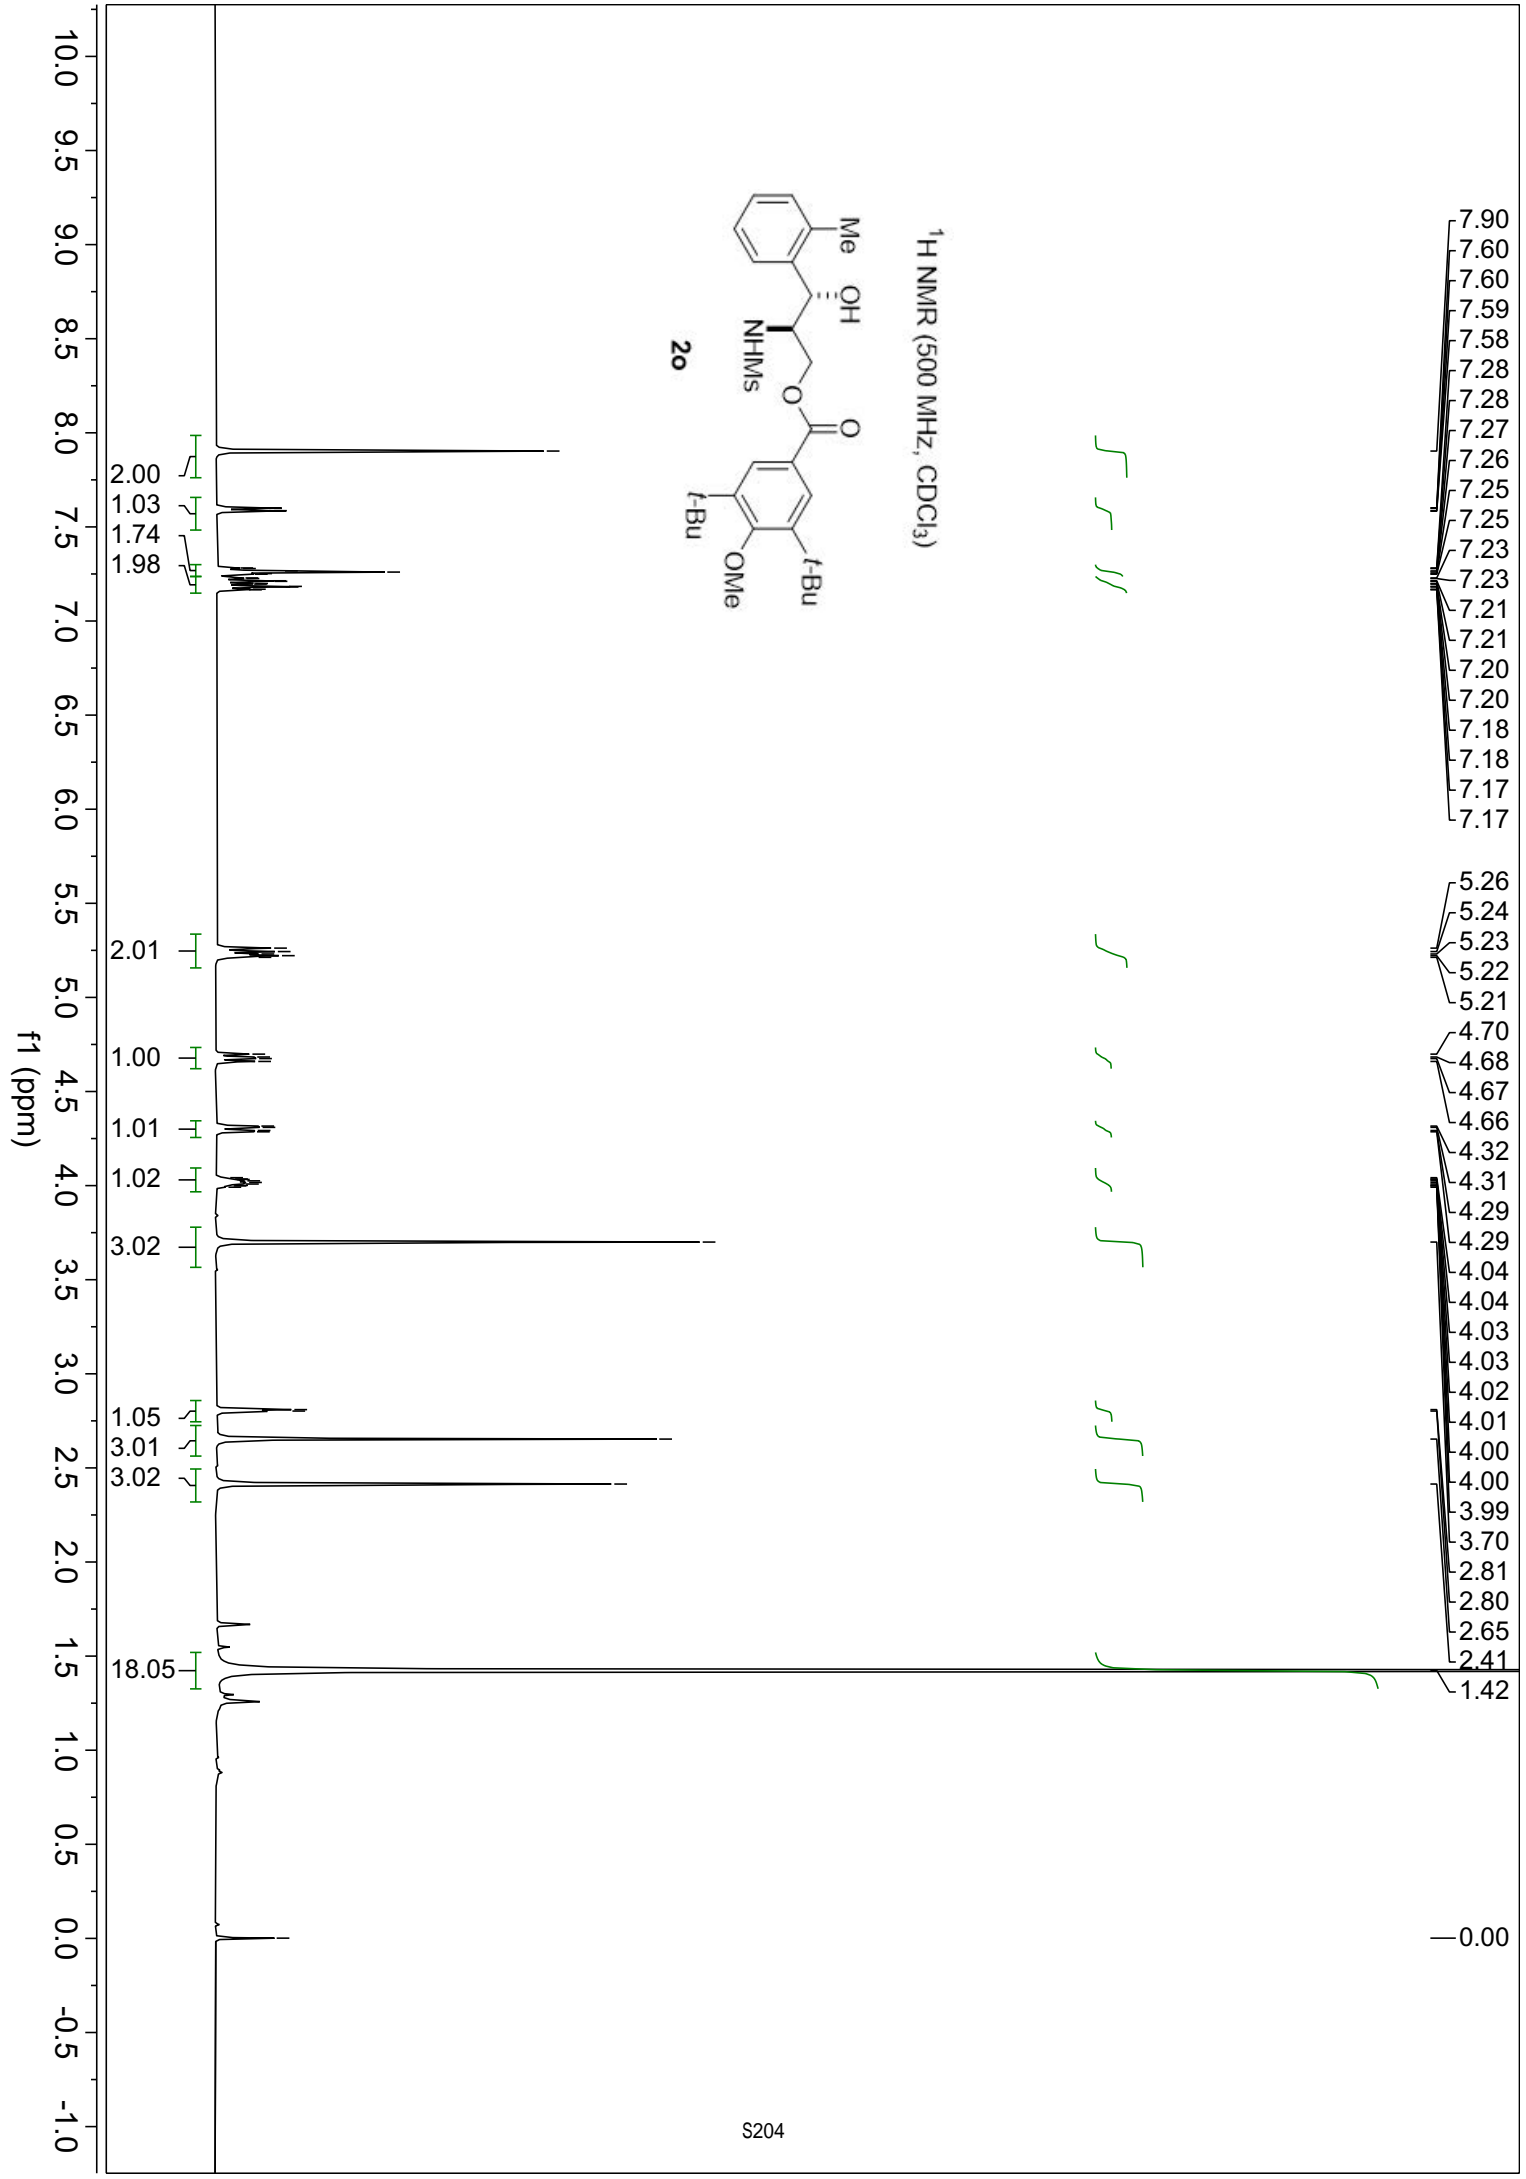

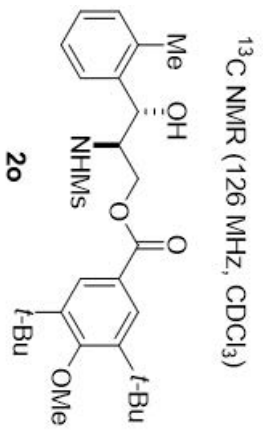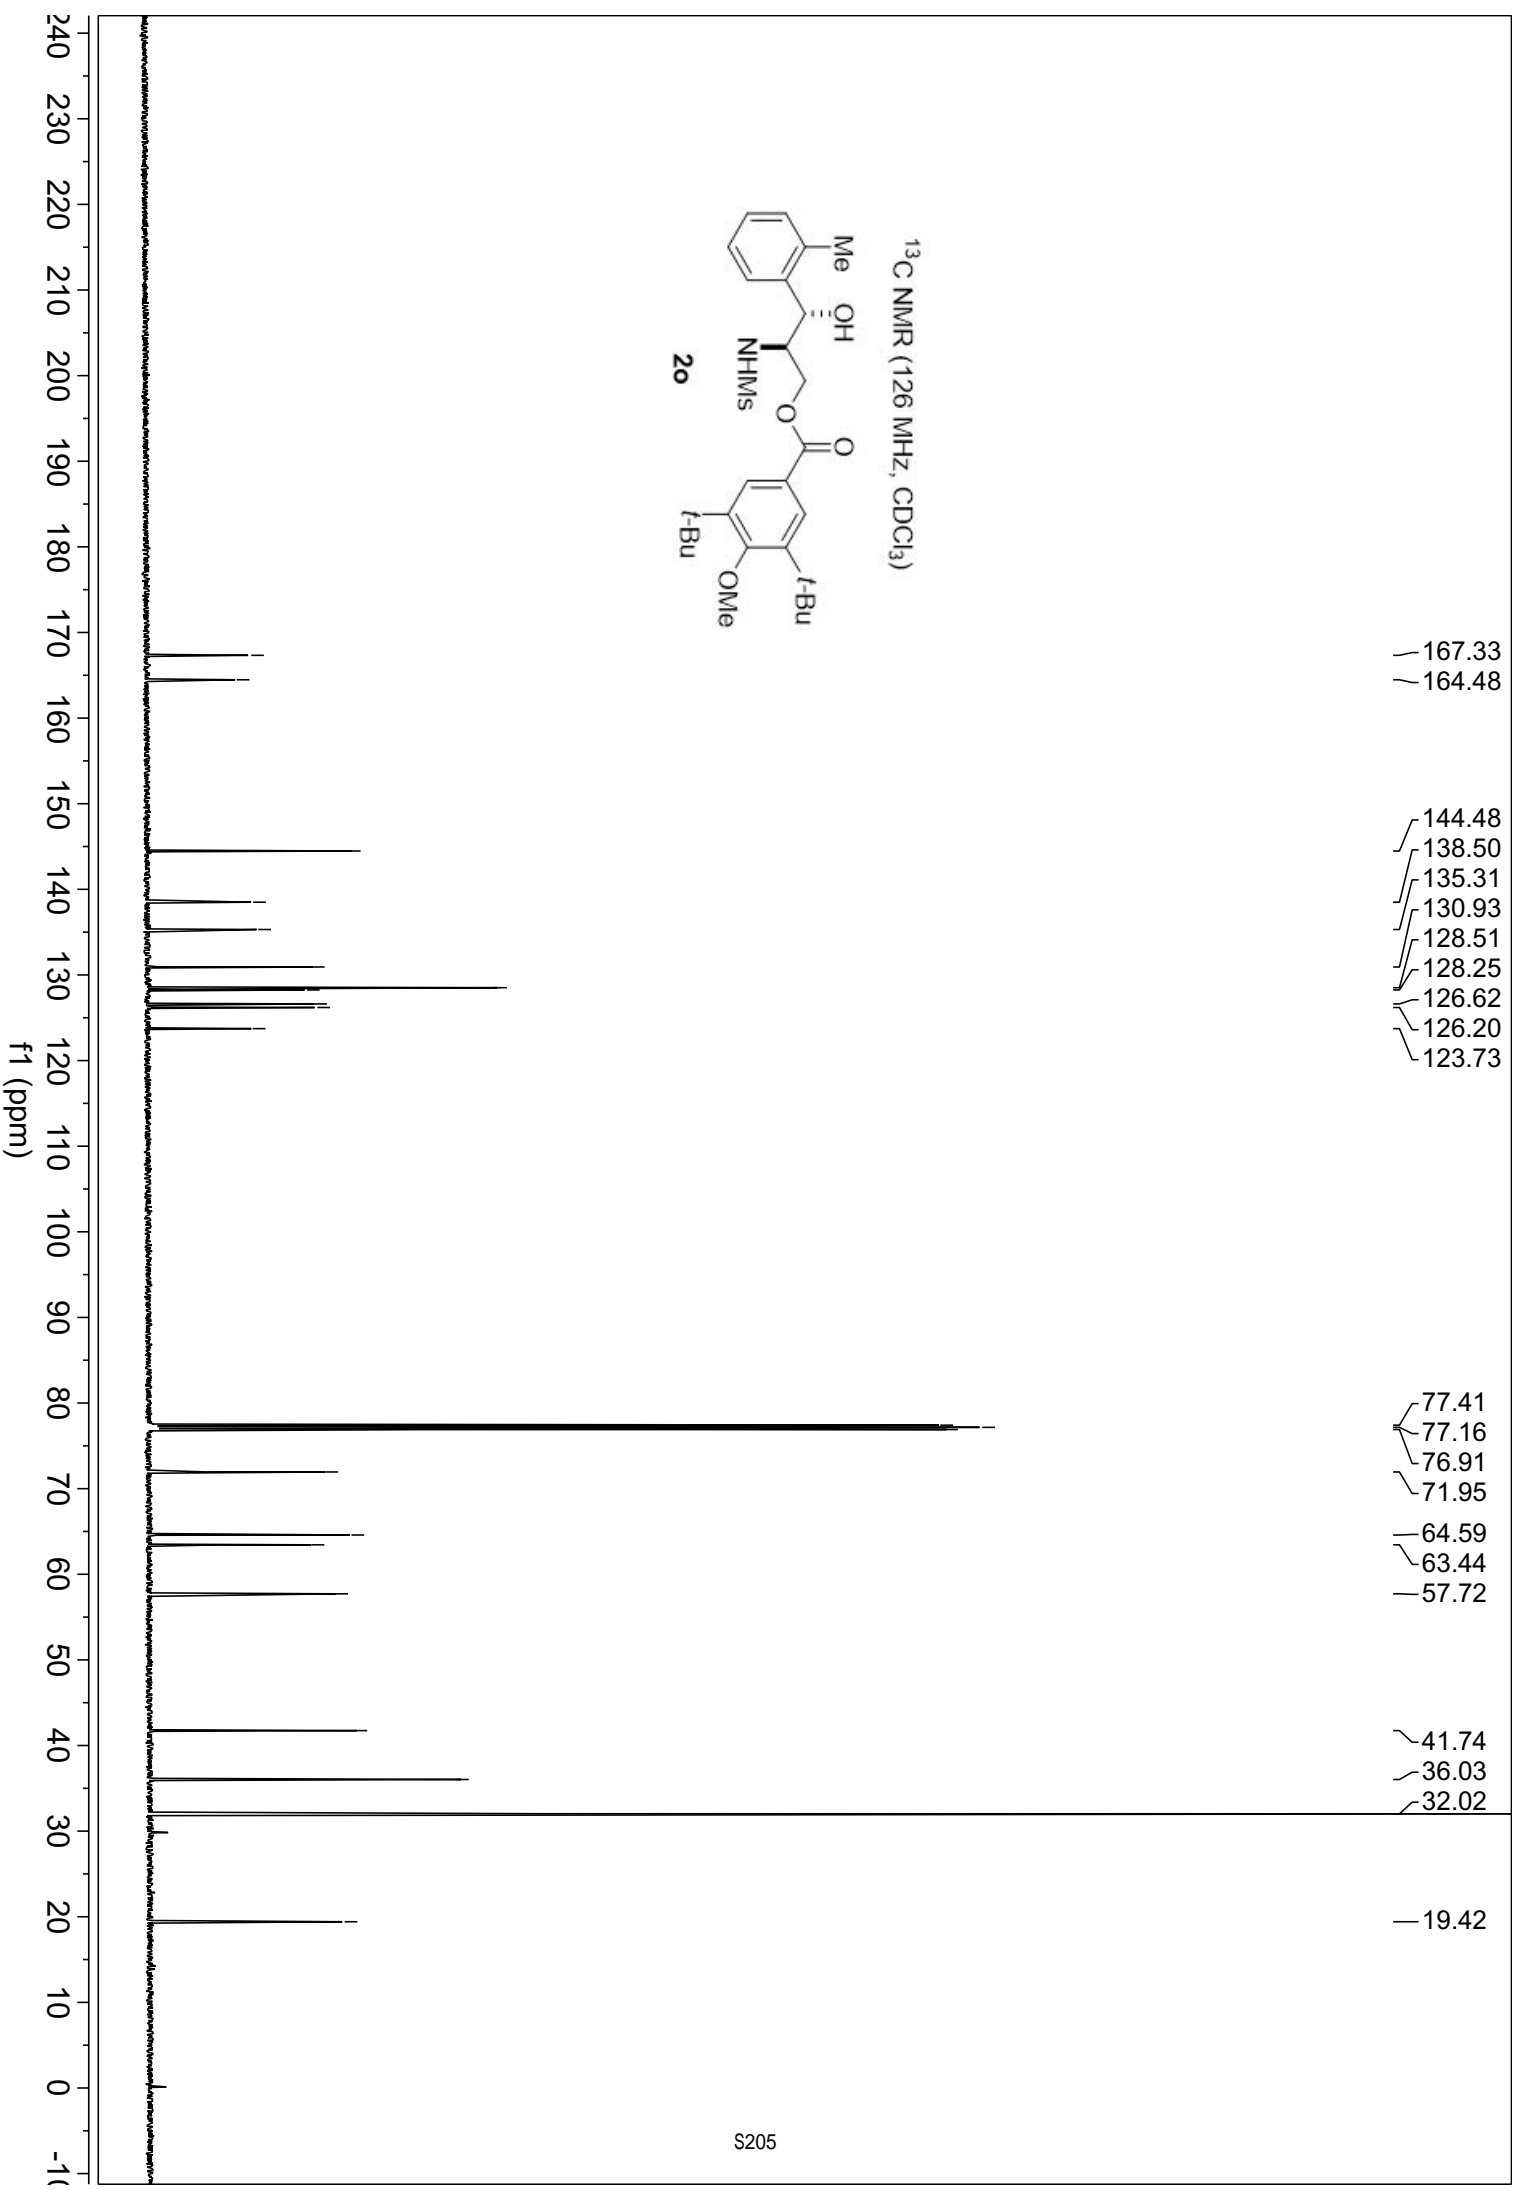

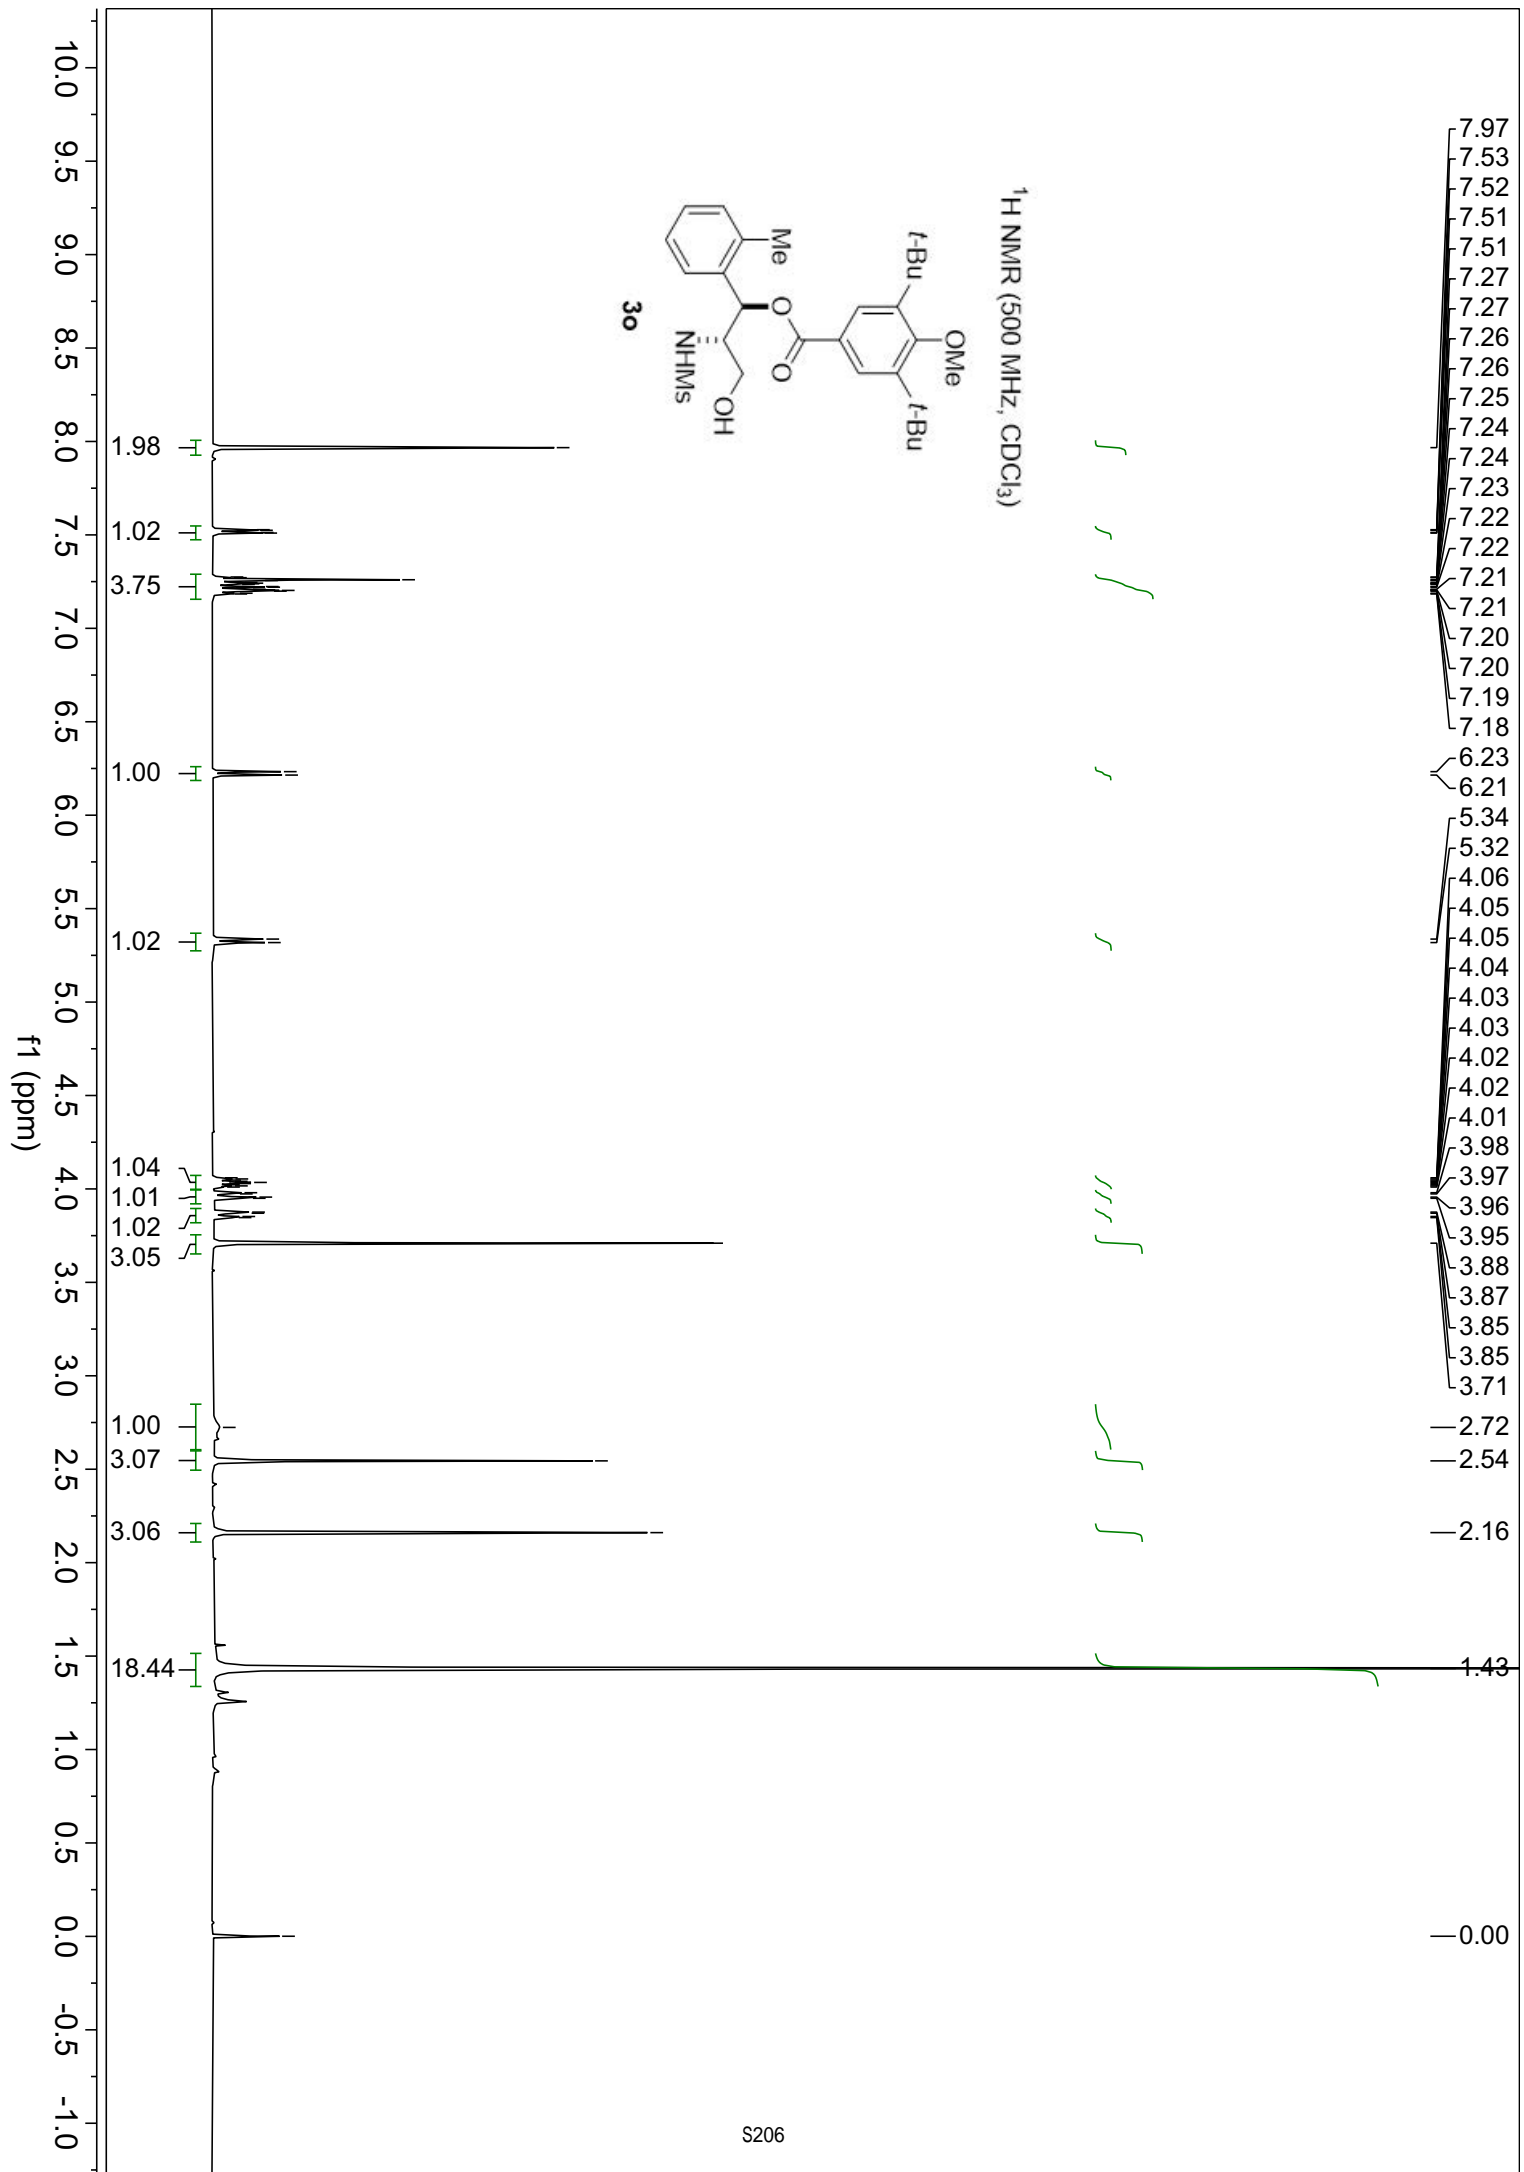

<sup>13</sup>C NMR (126 MHz, CDCl<sub>3</sub>)

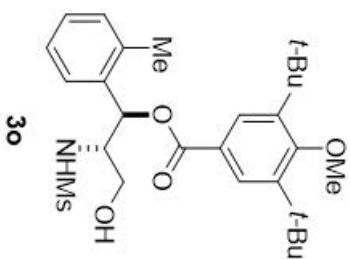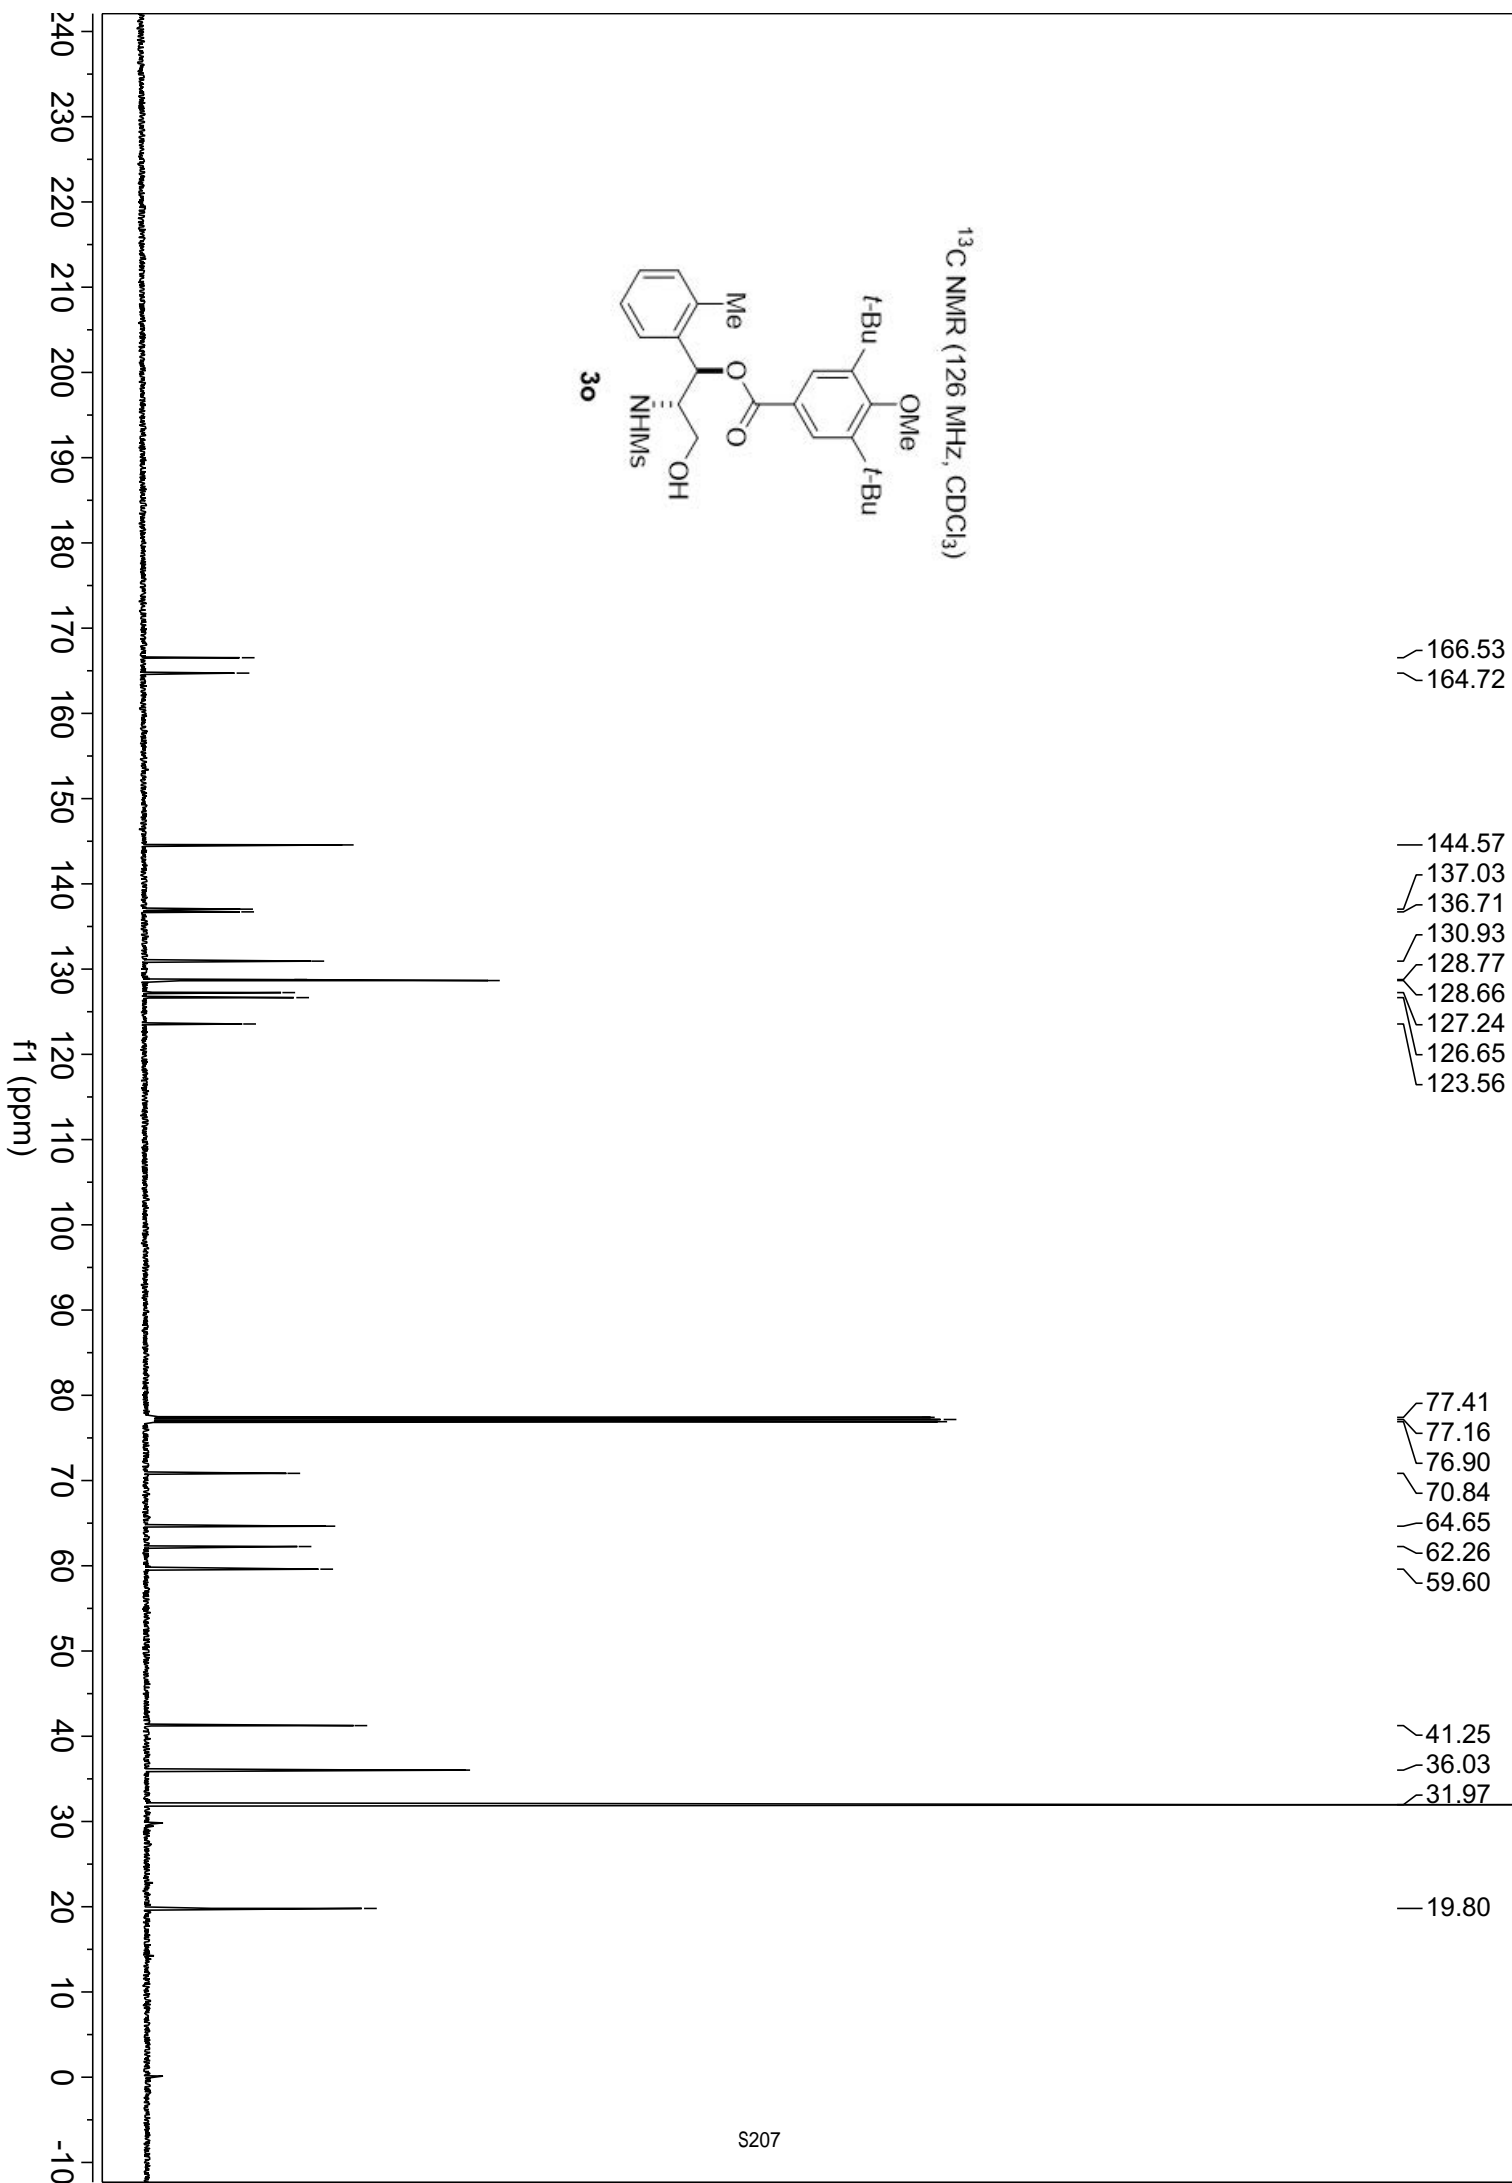

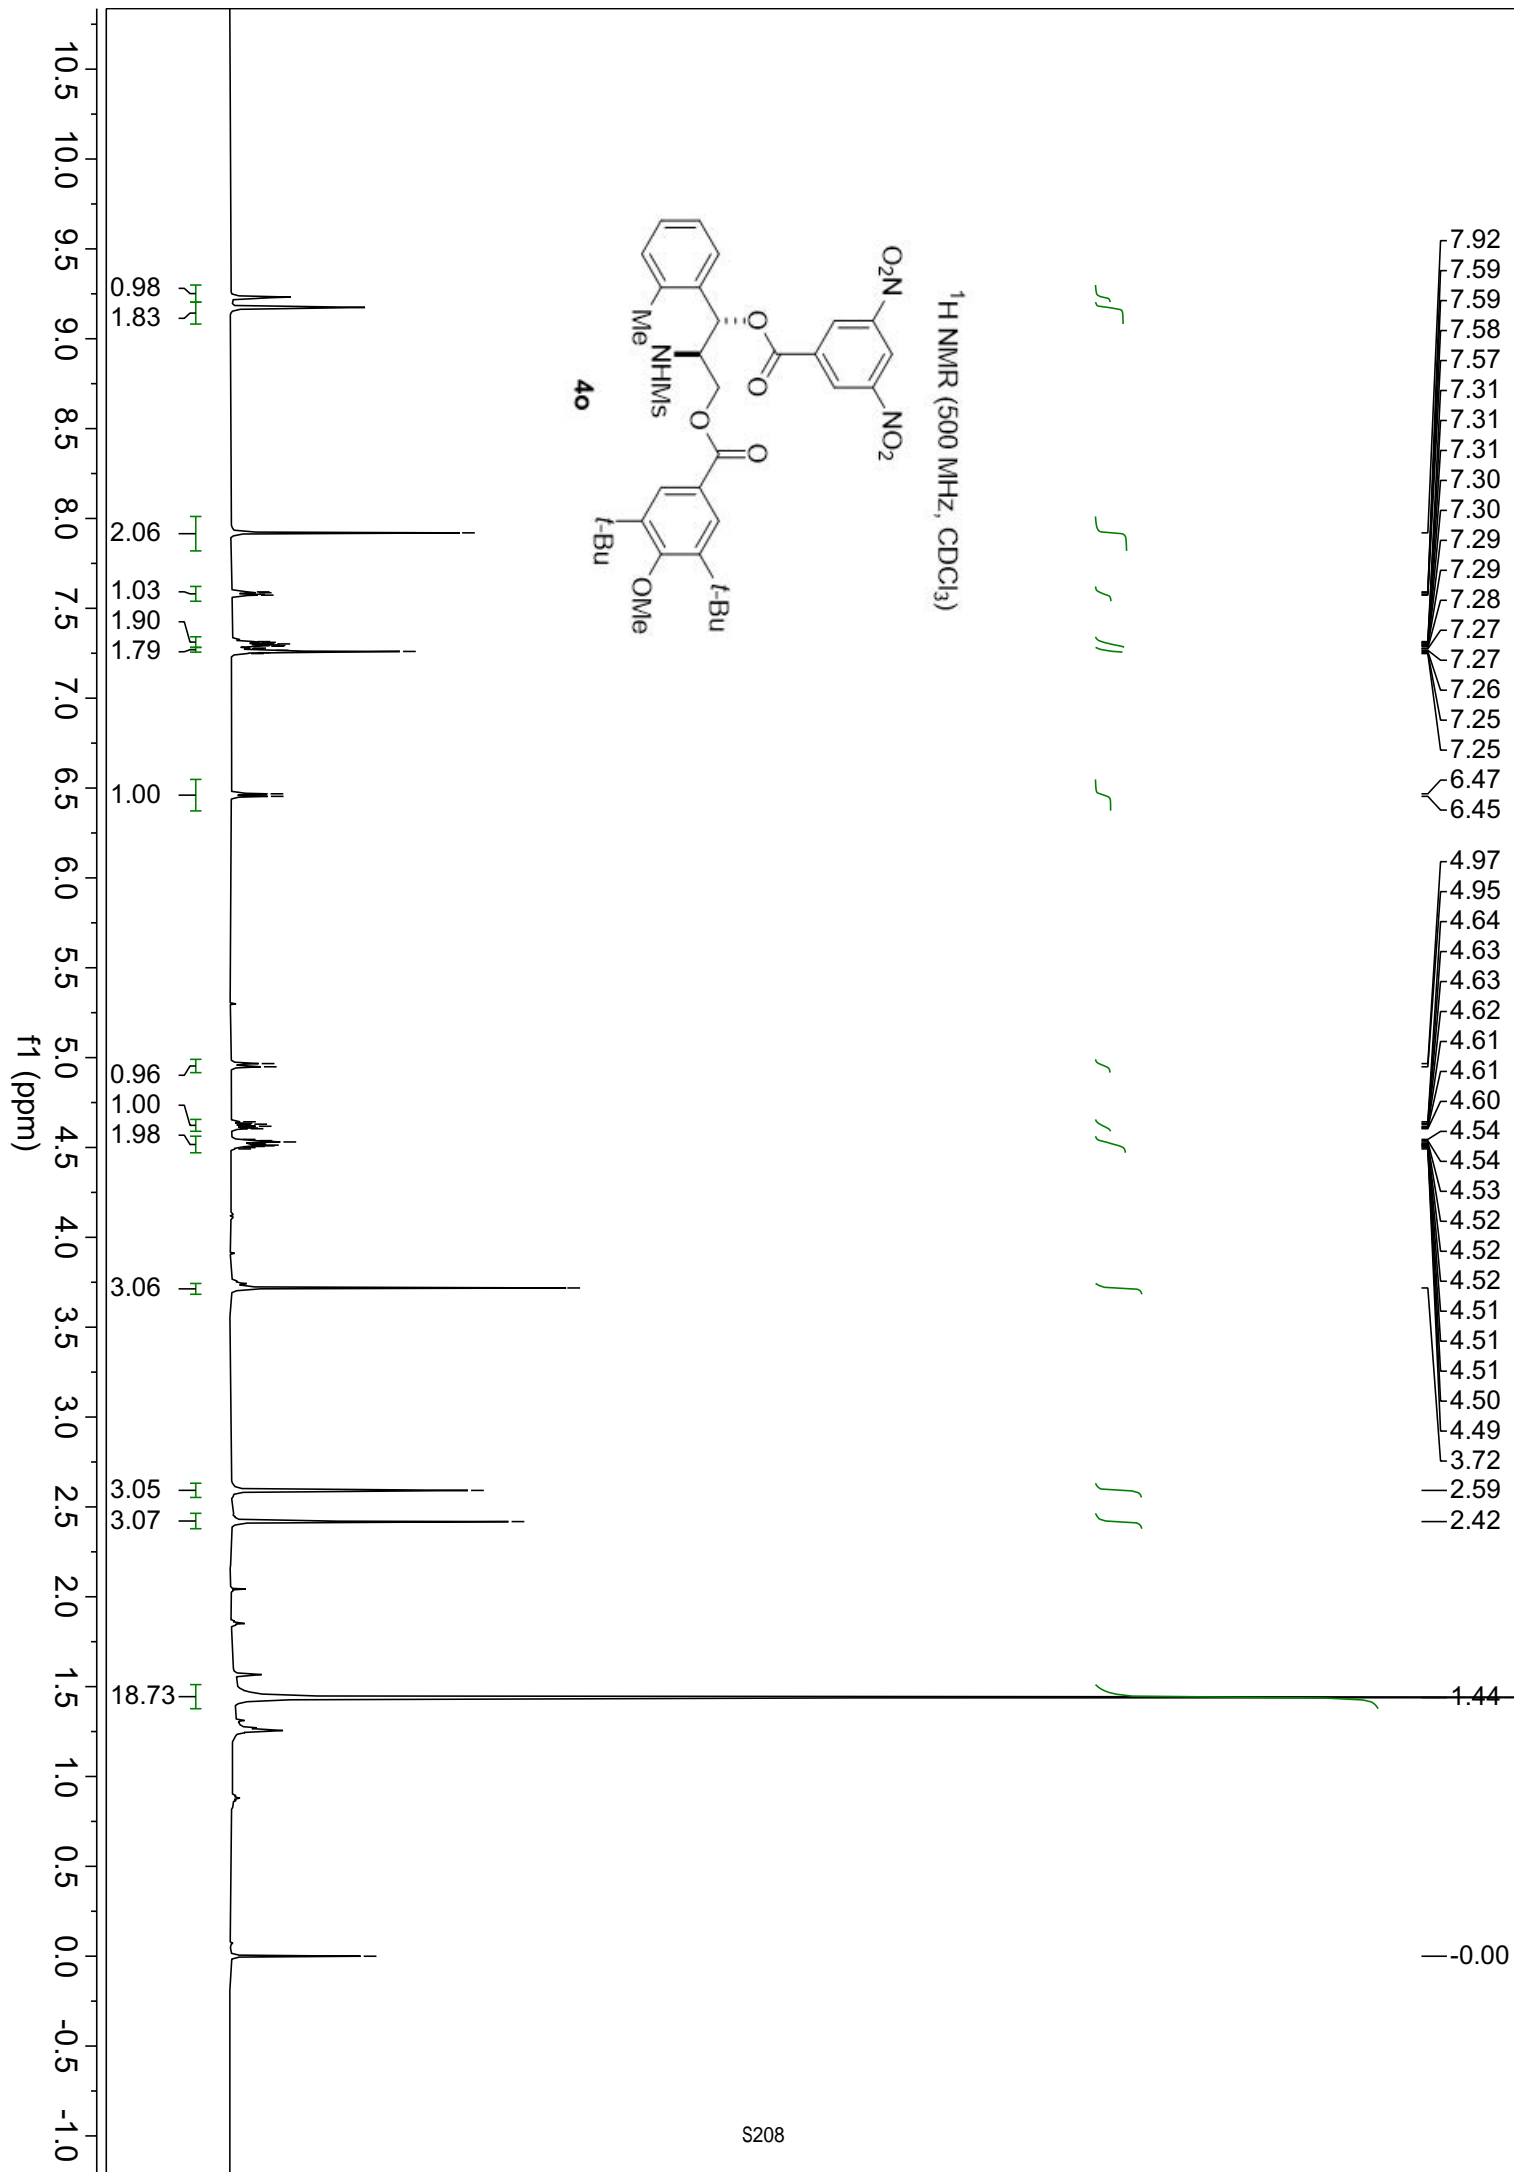



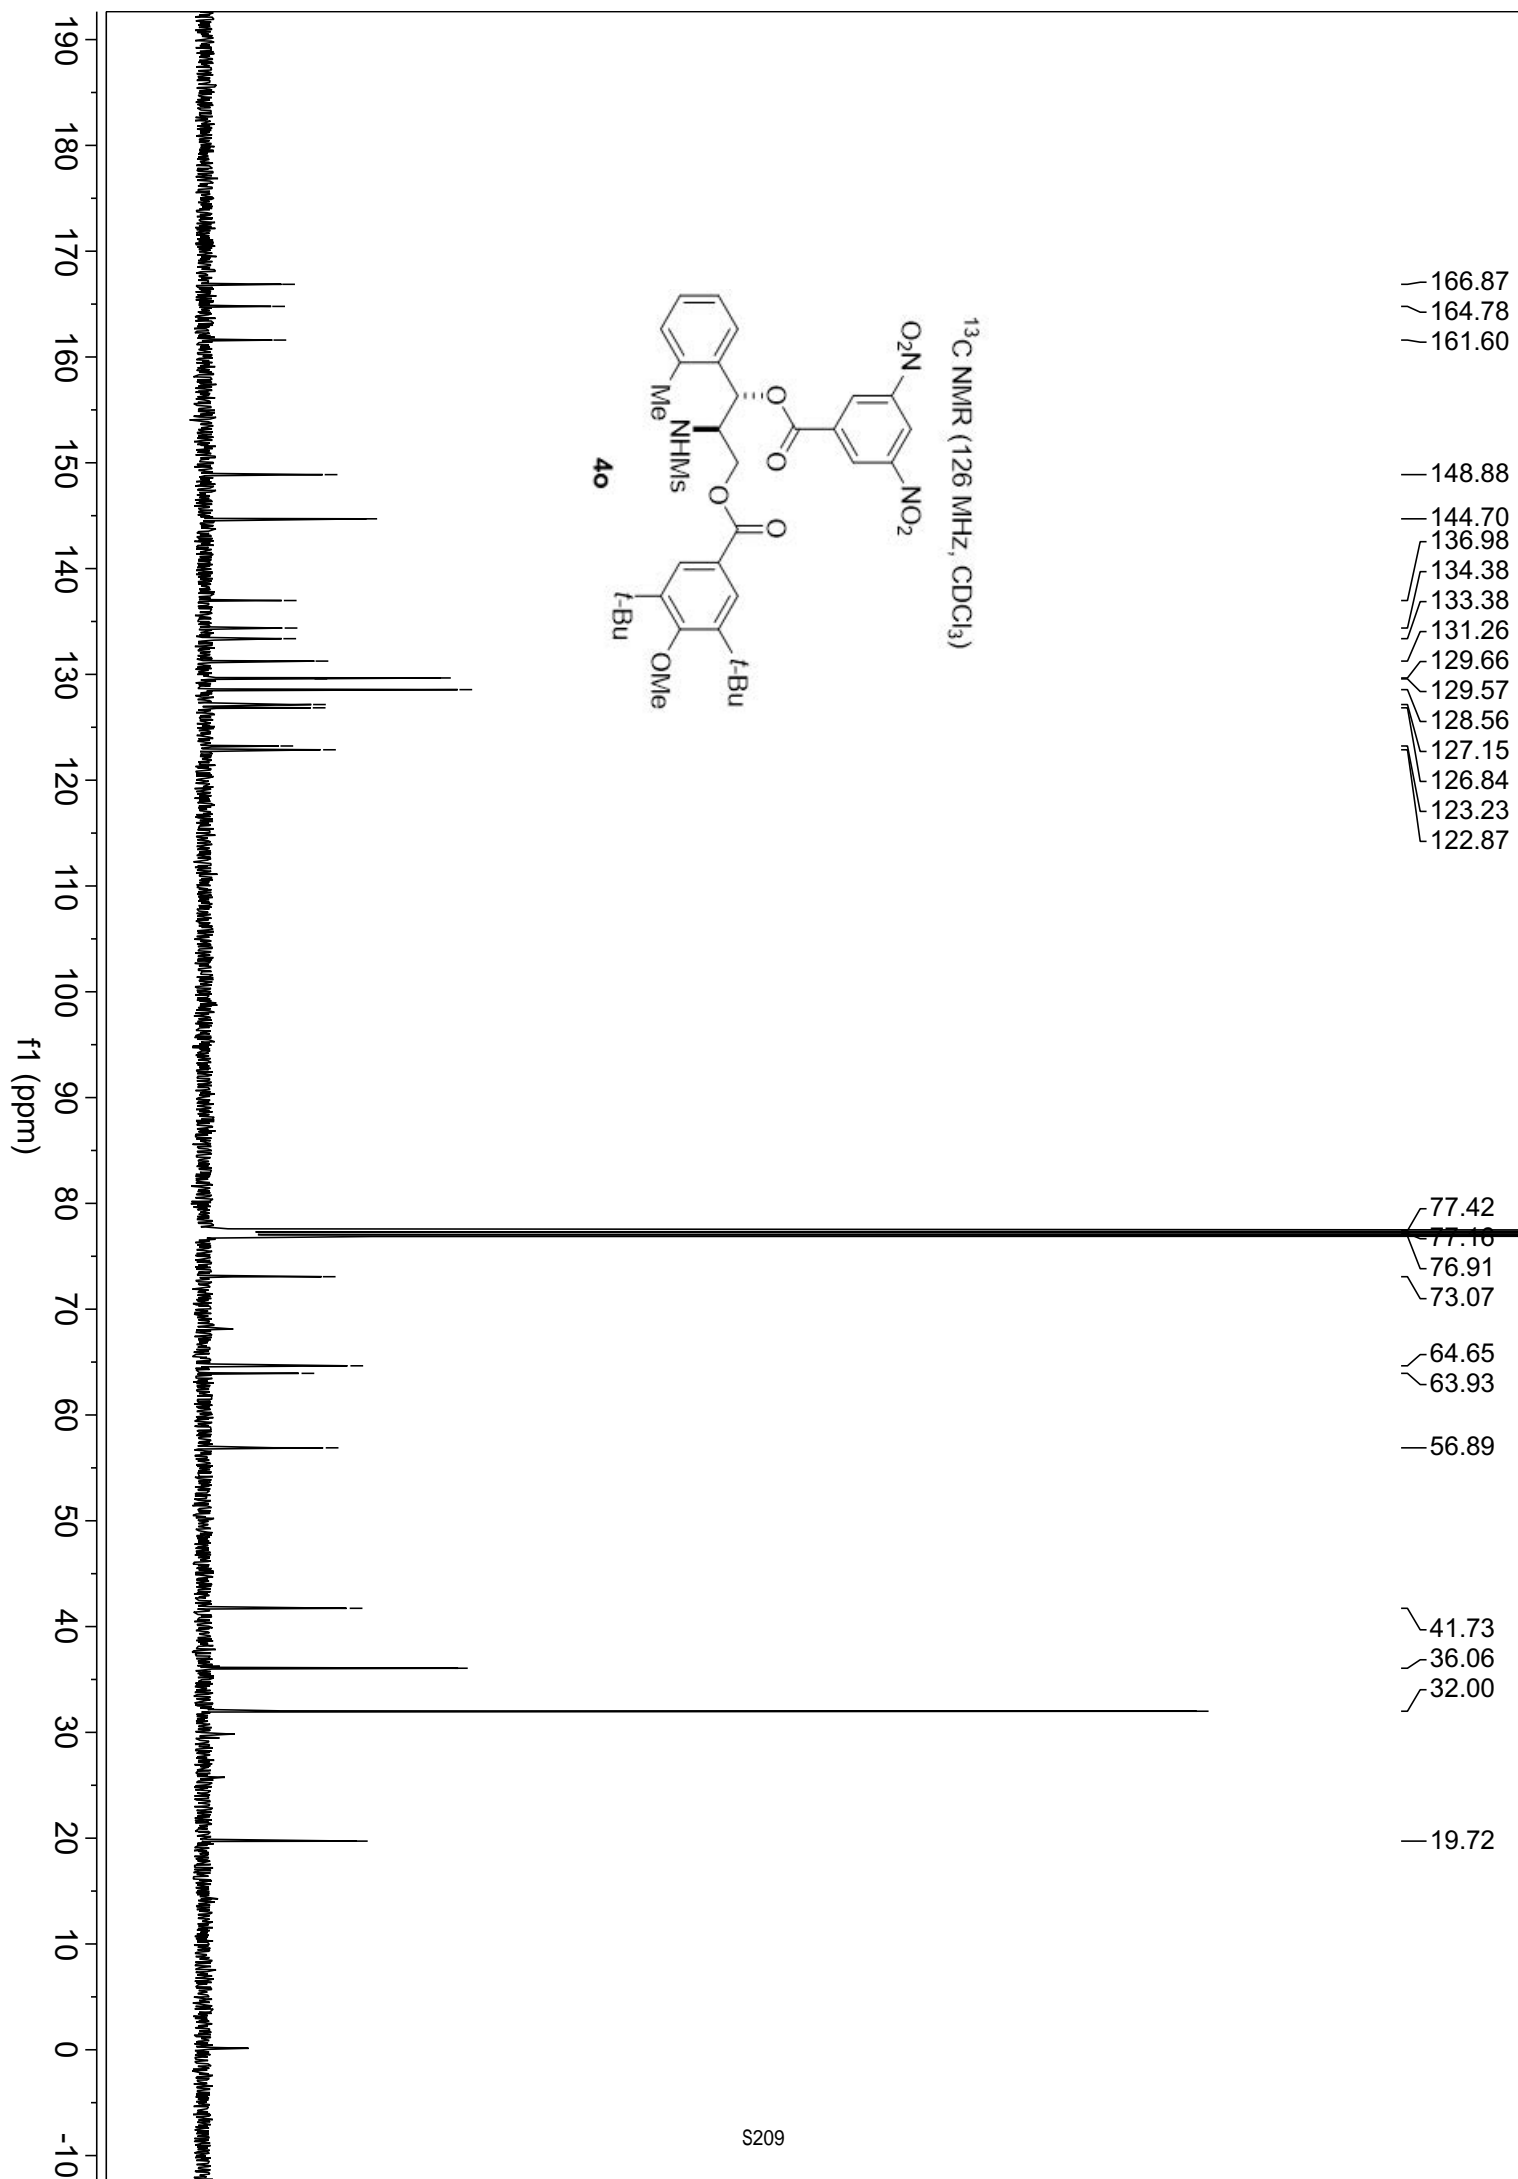

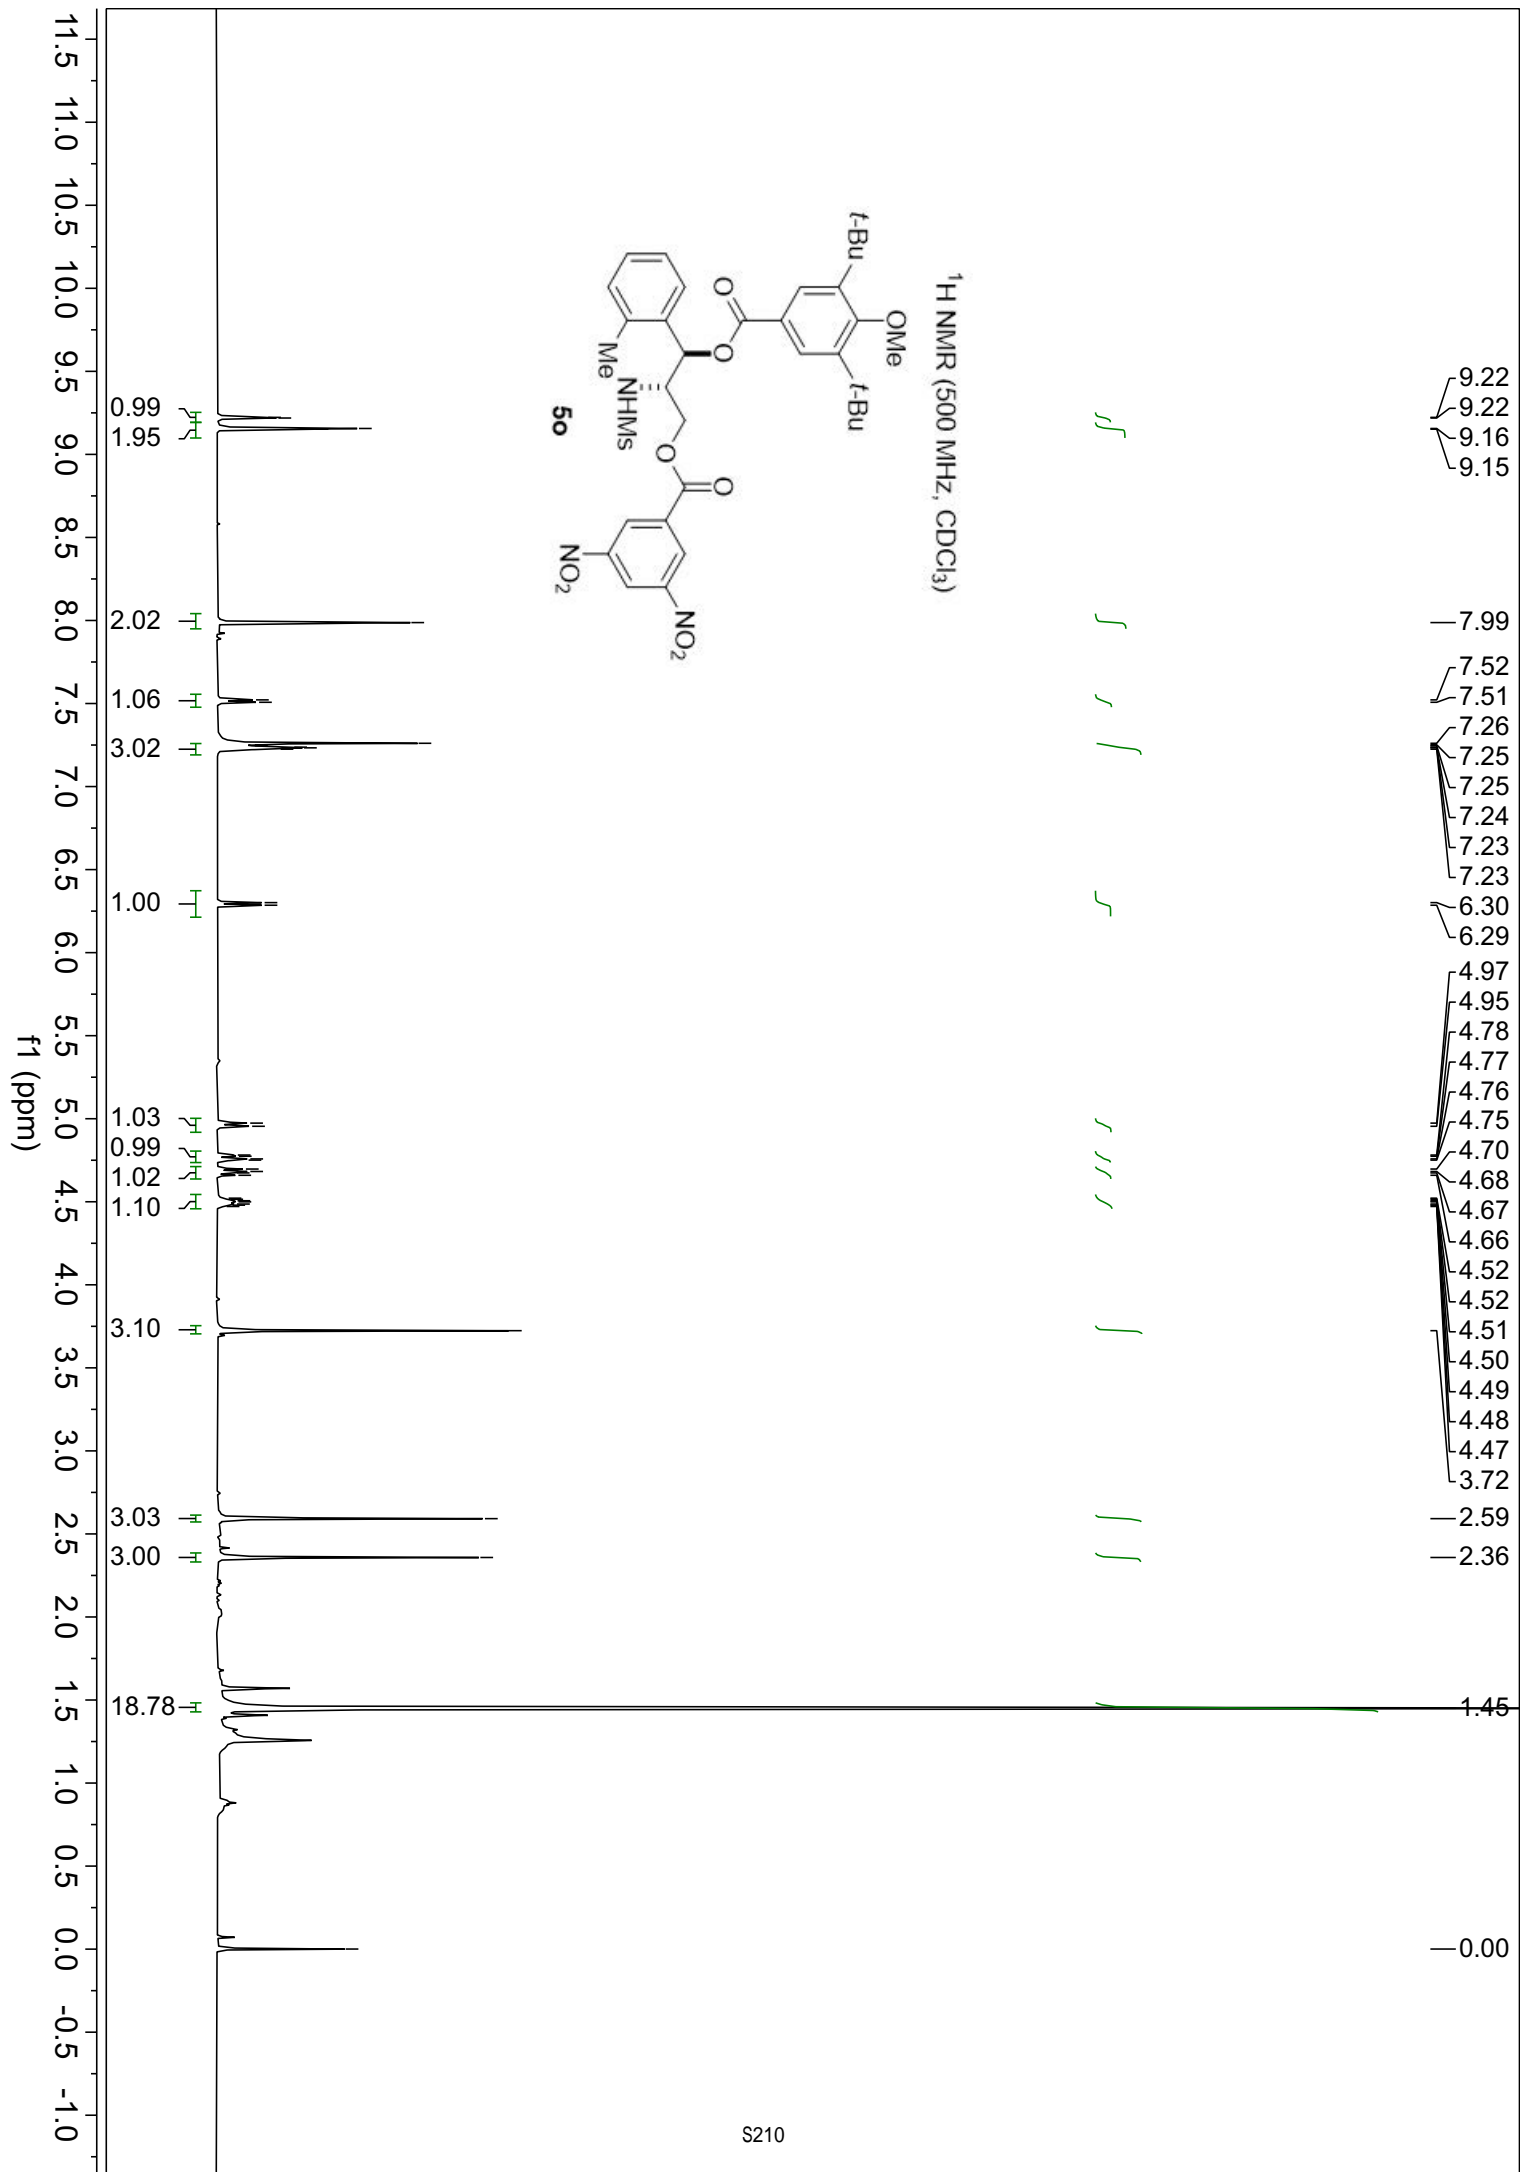

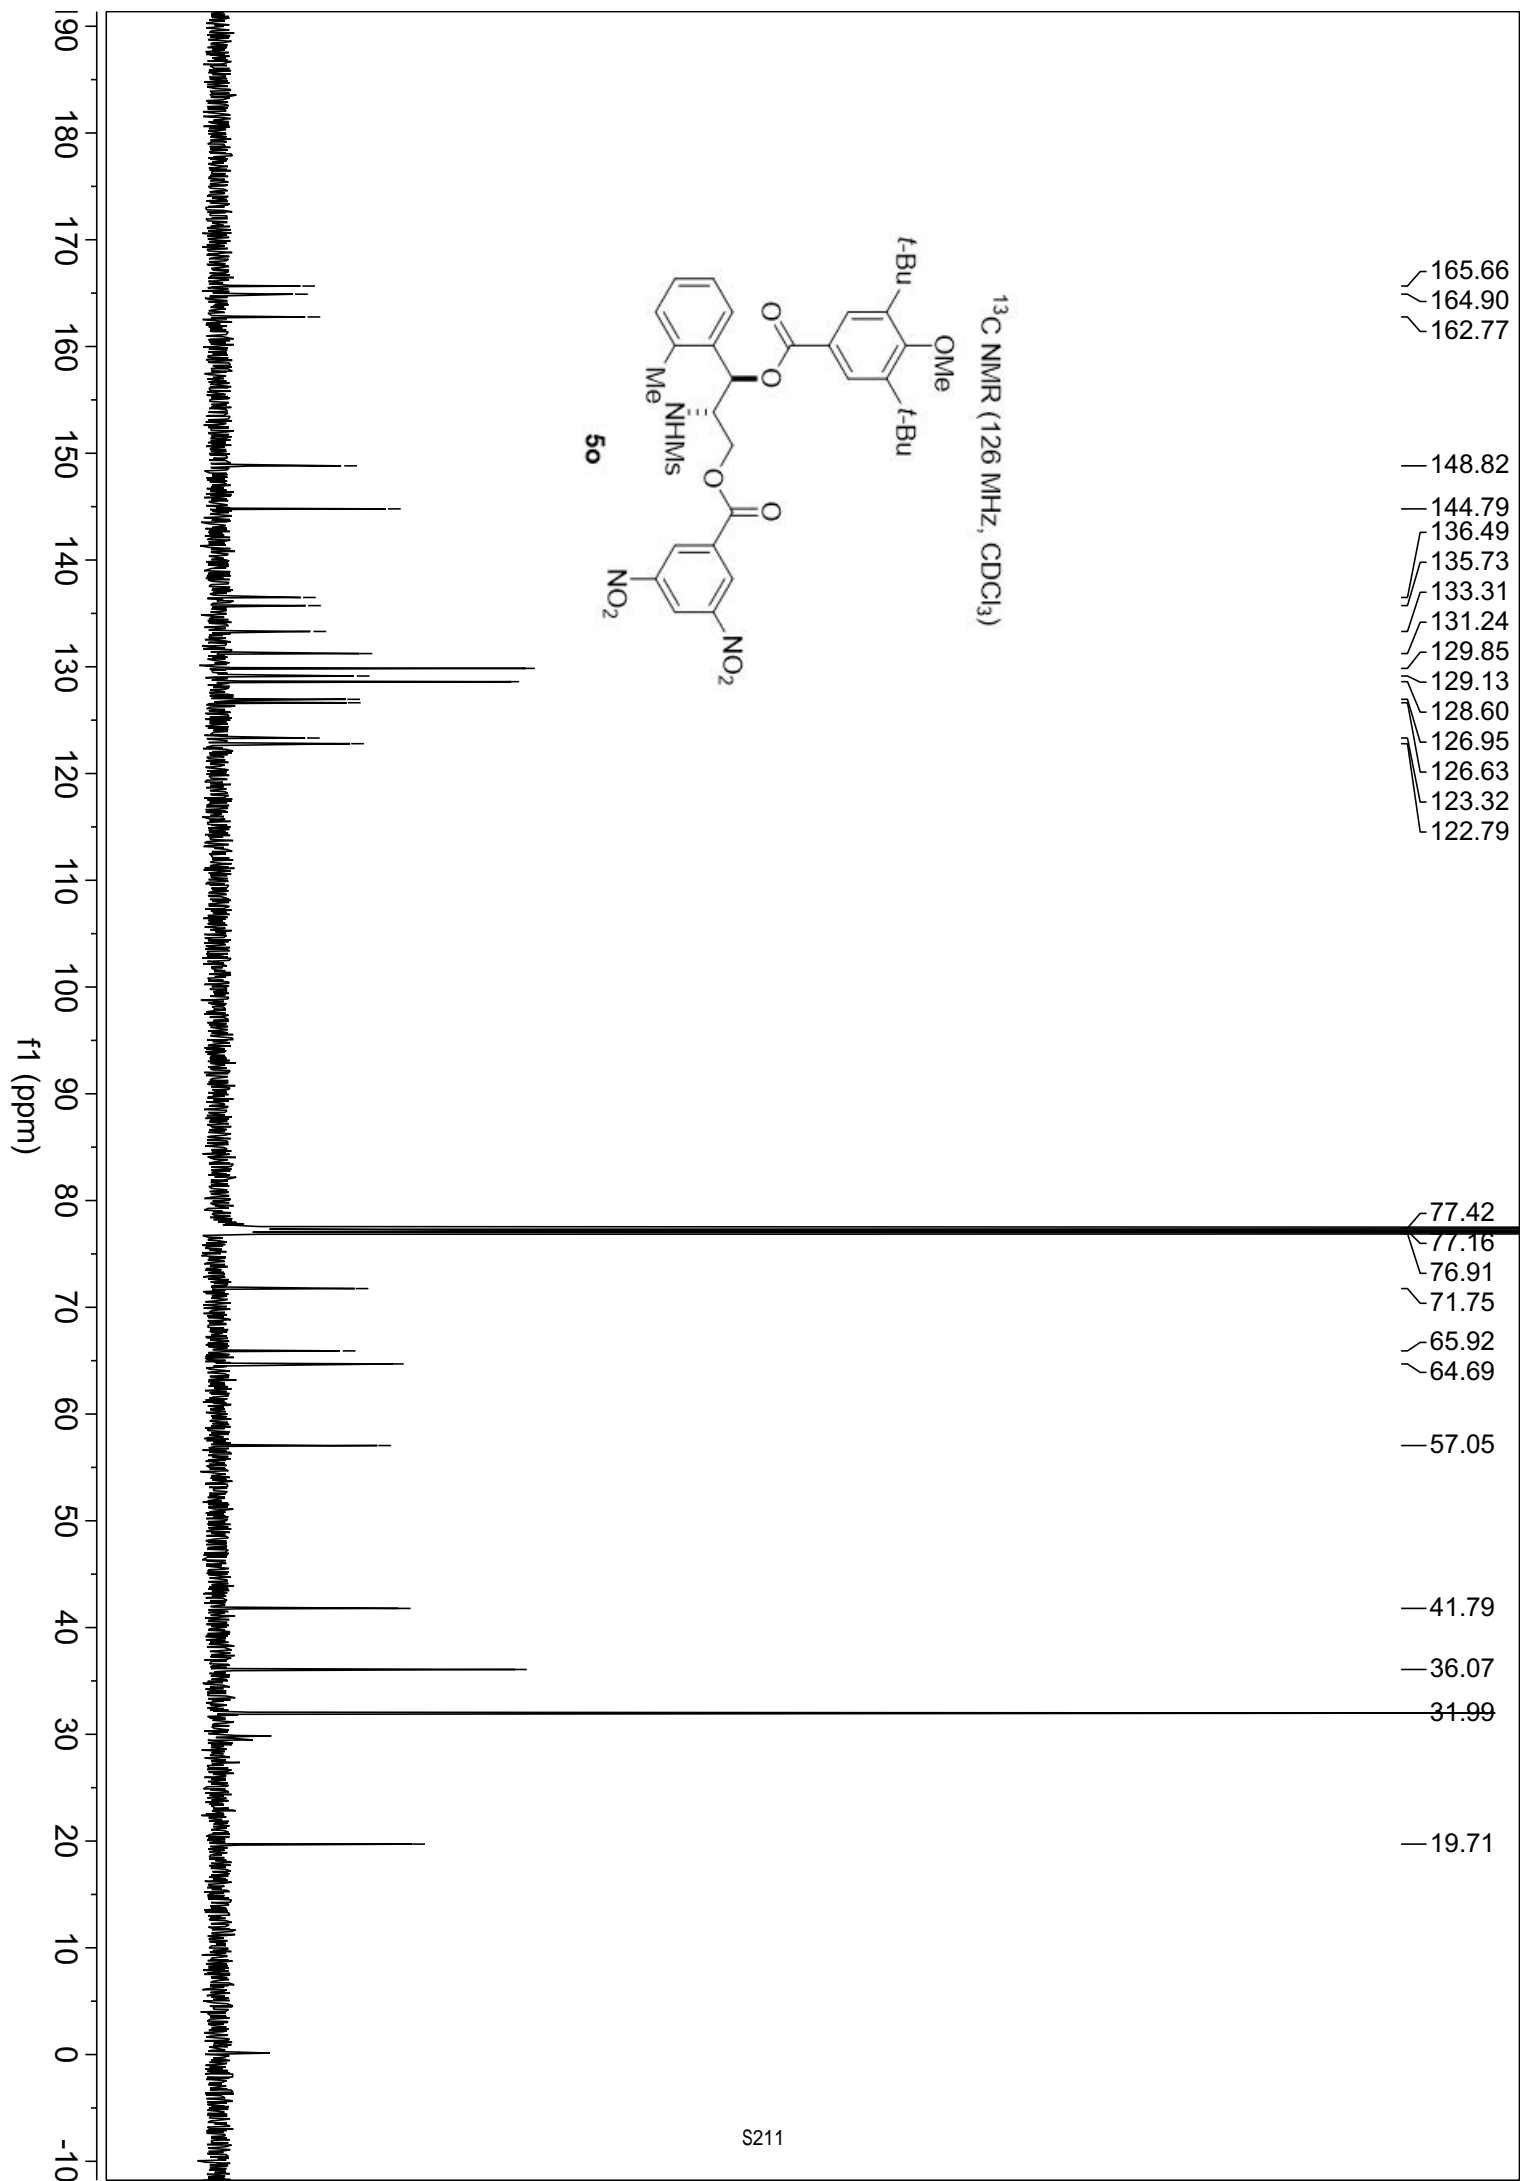

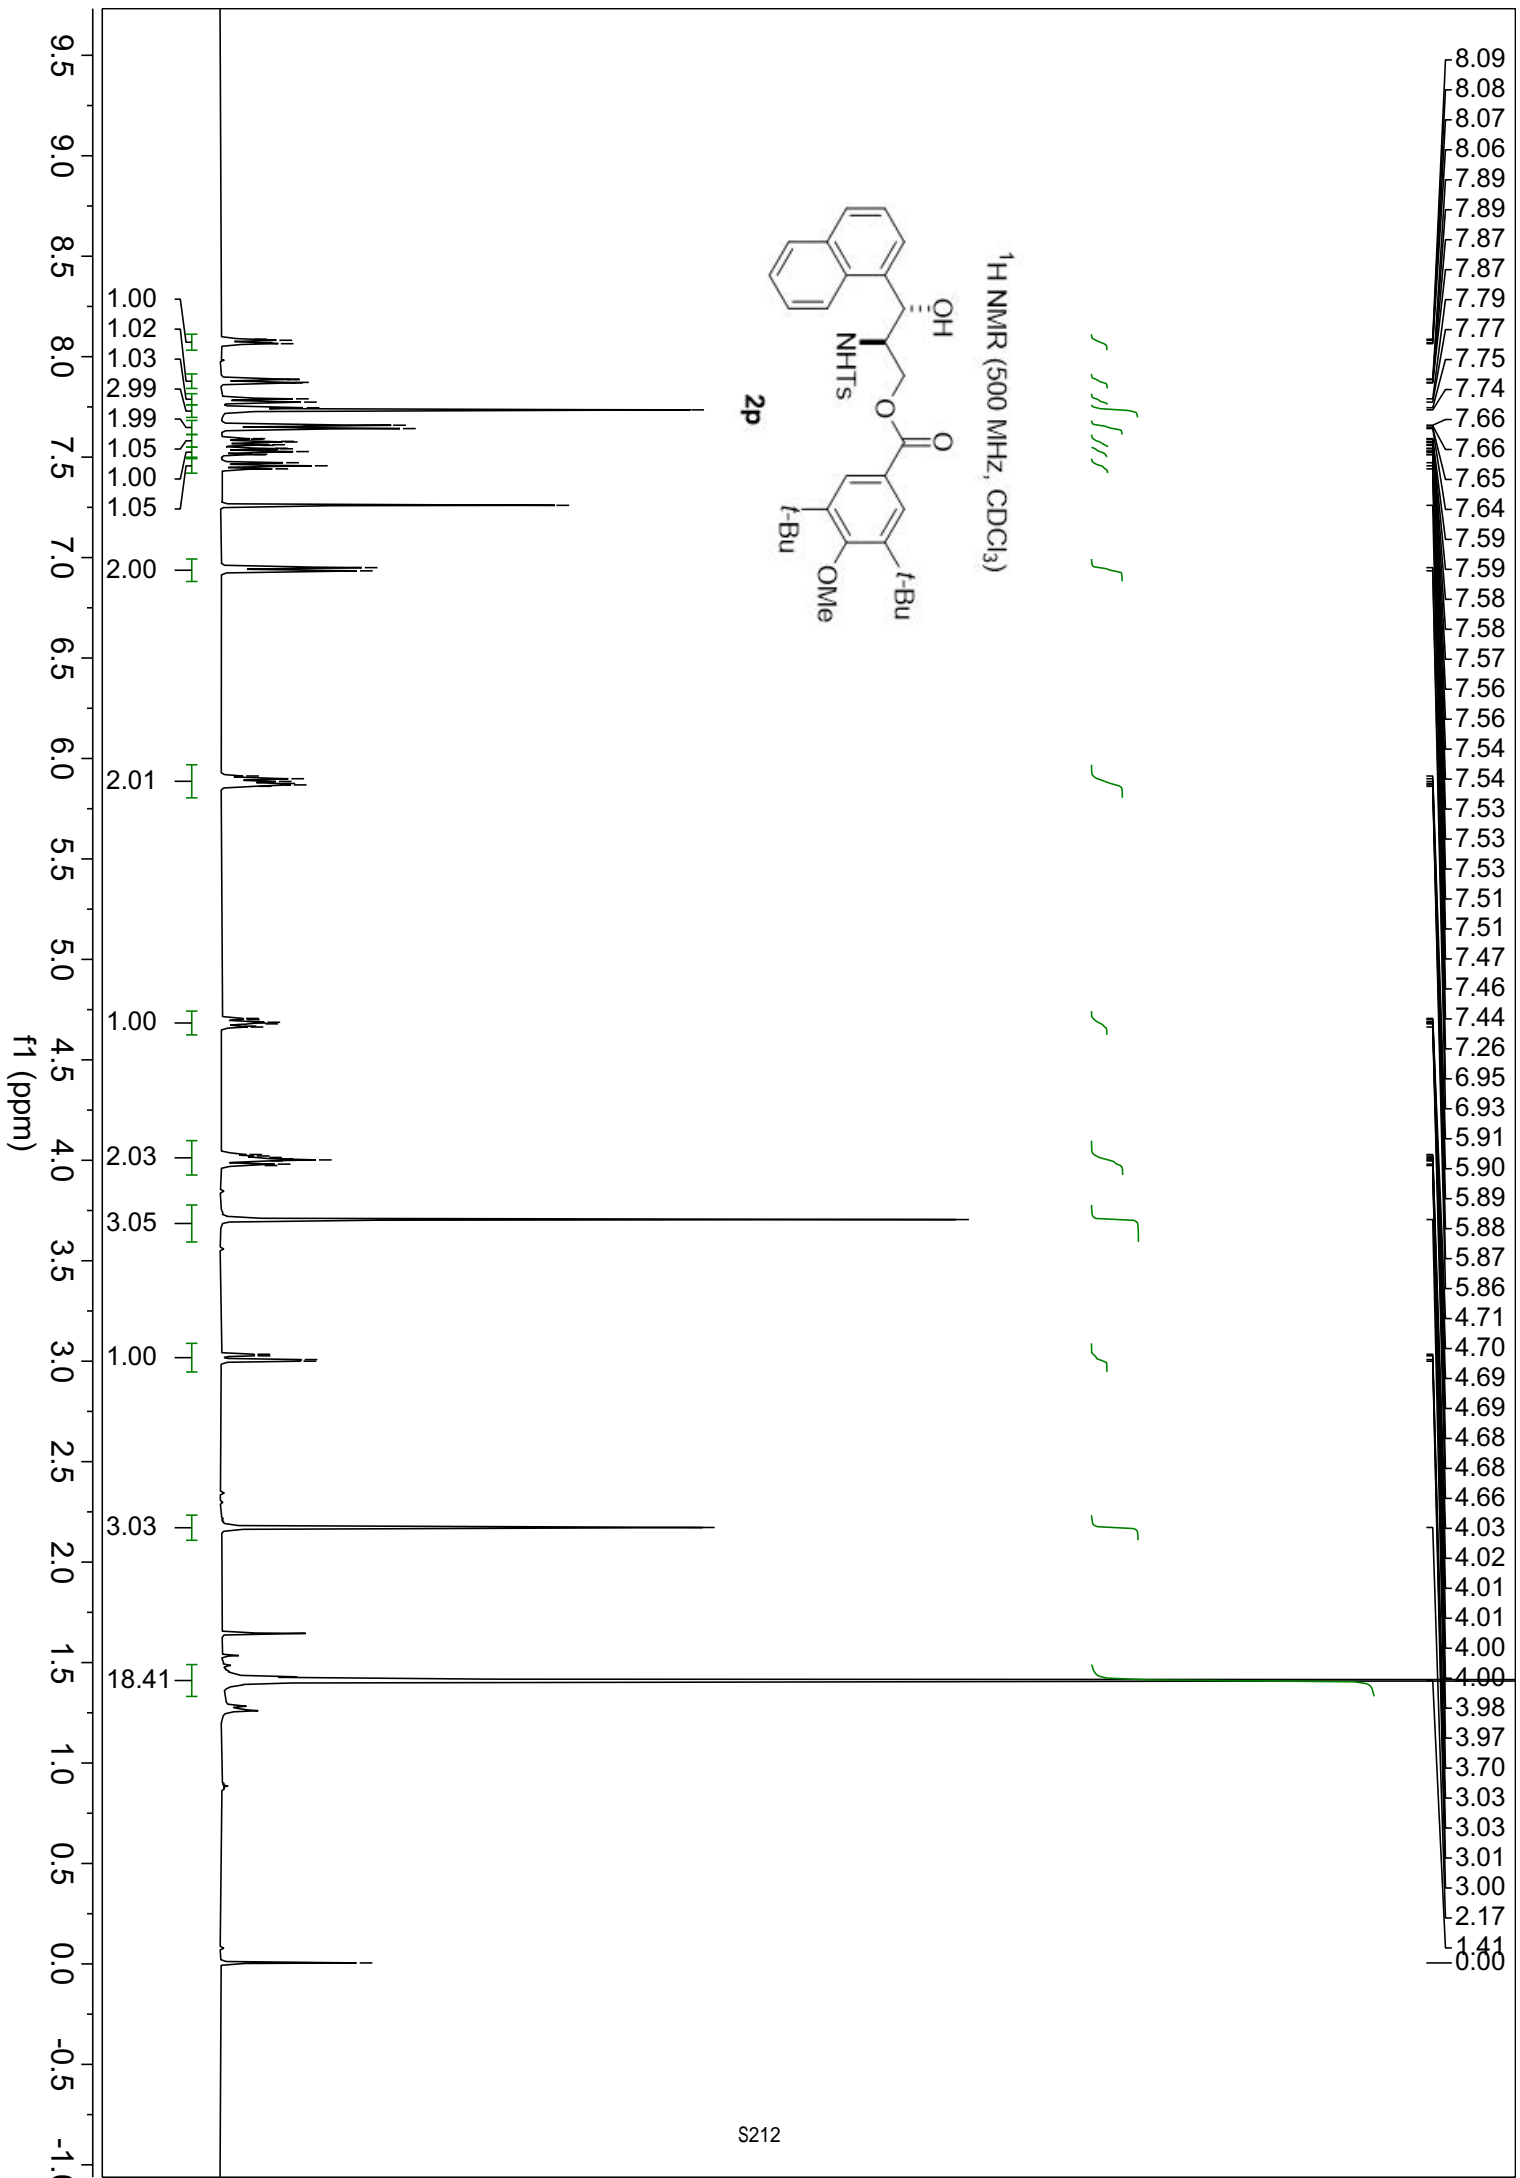

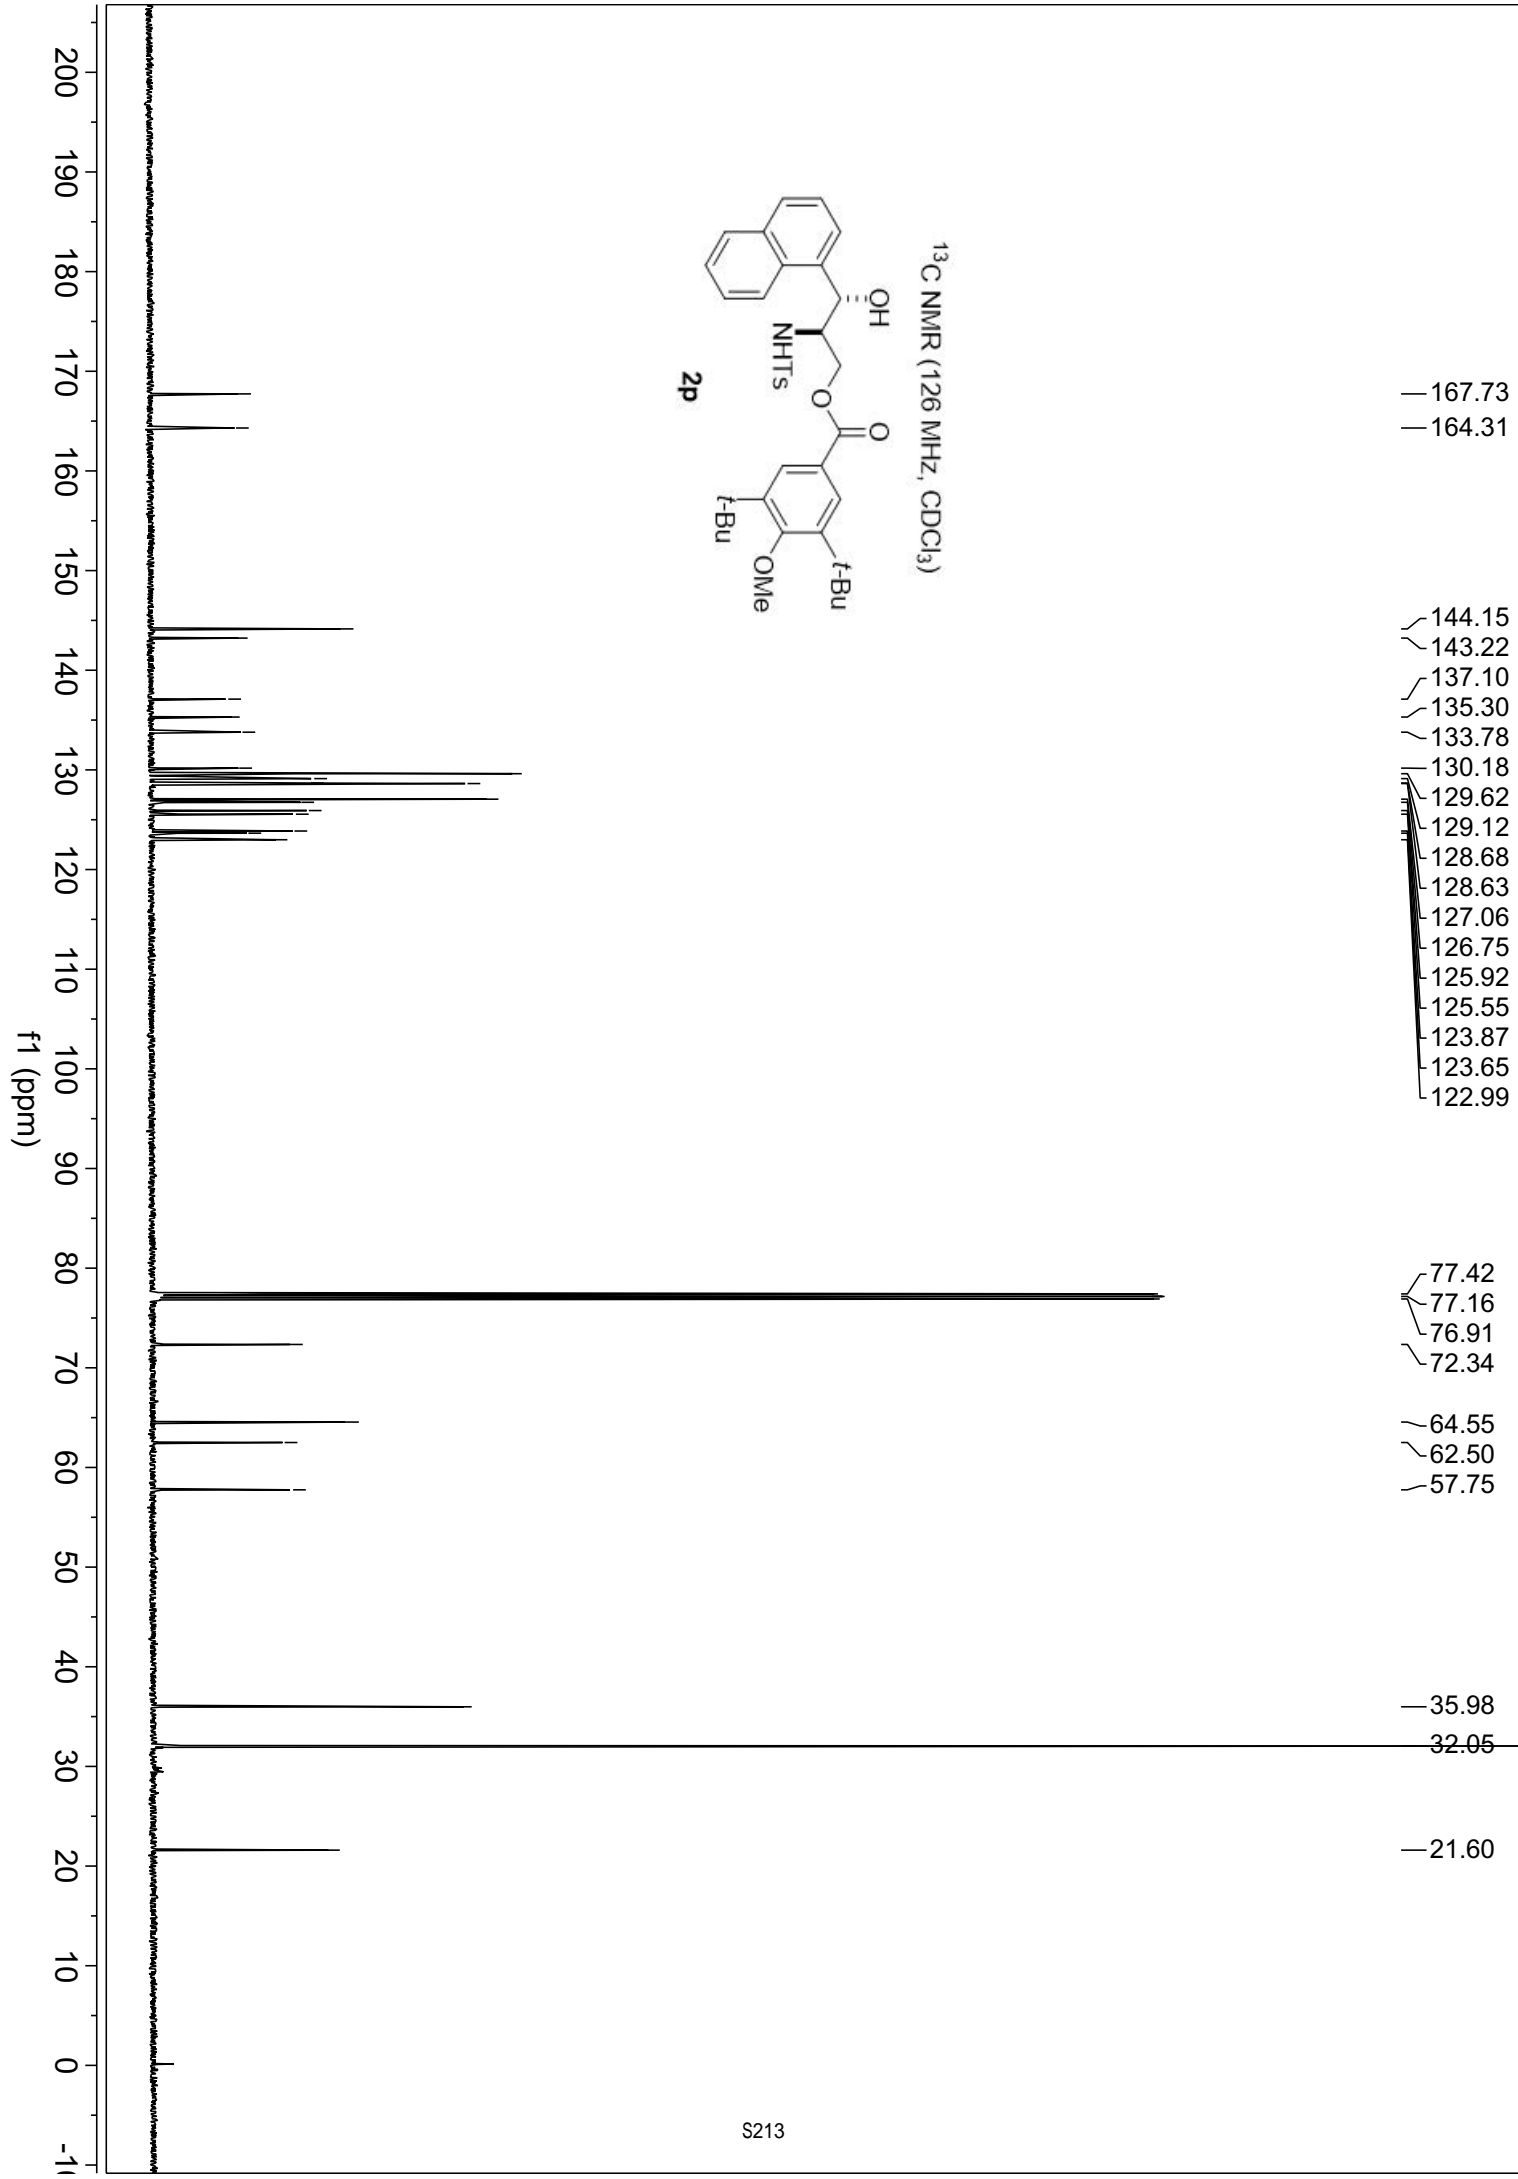

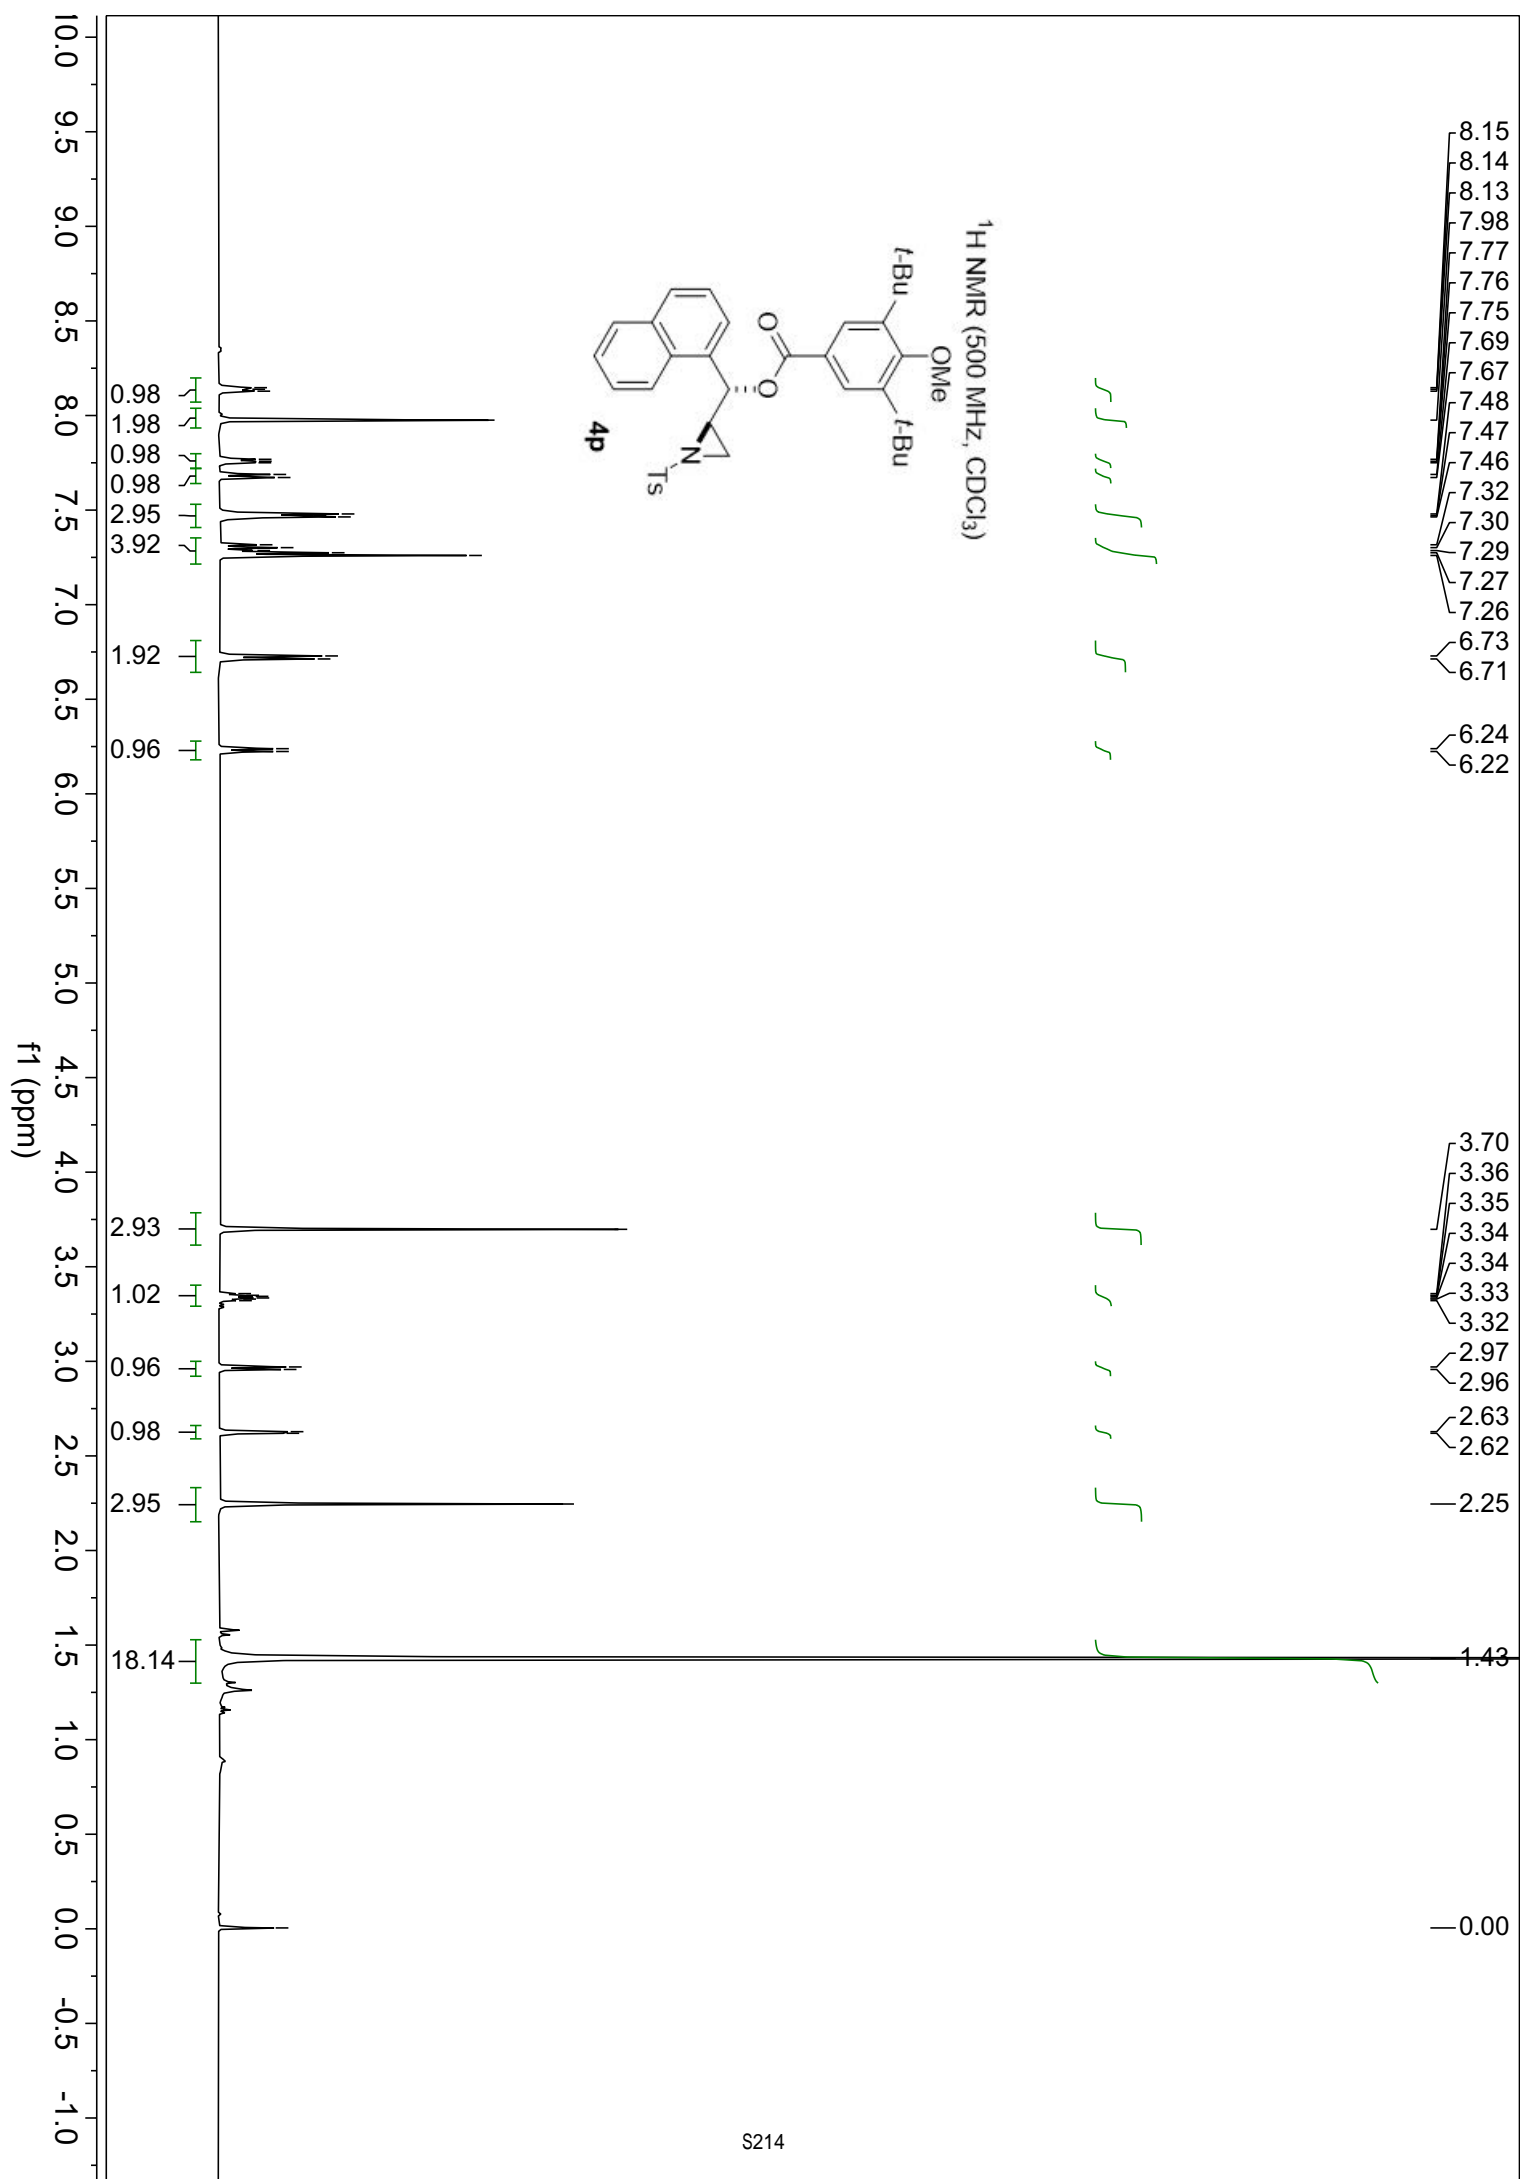

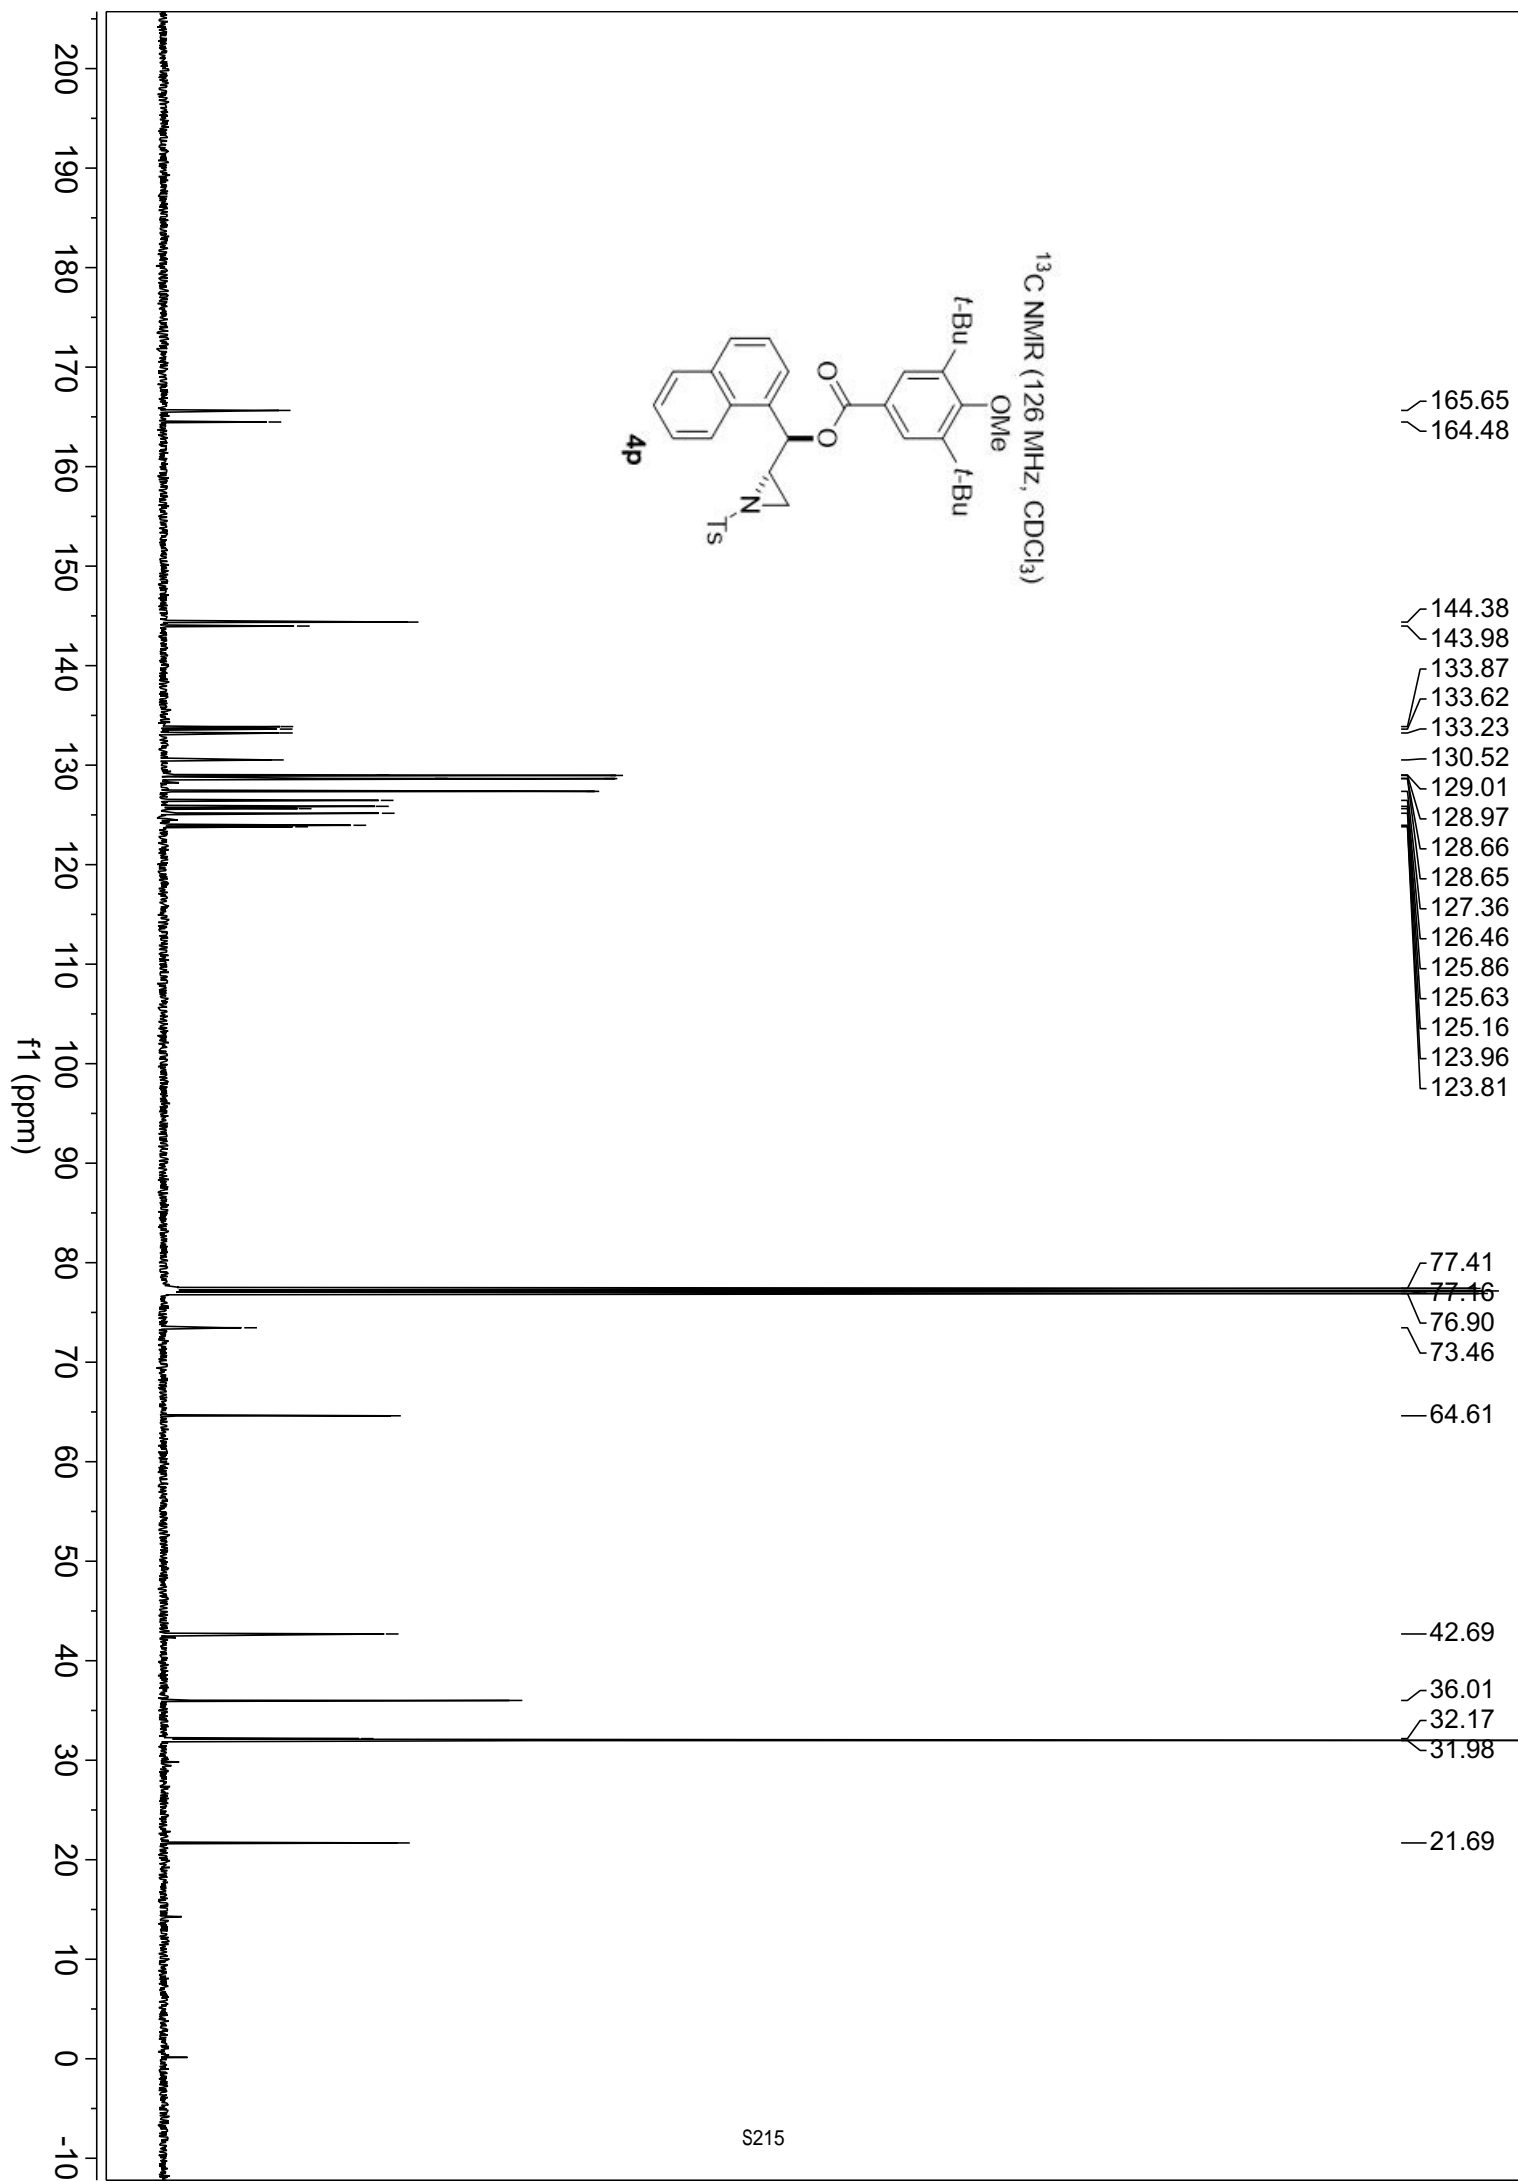

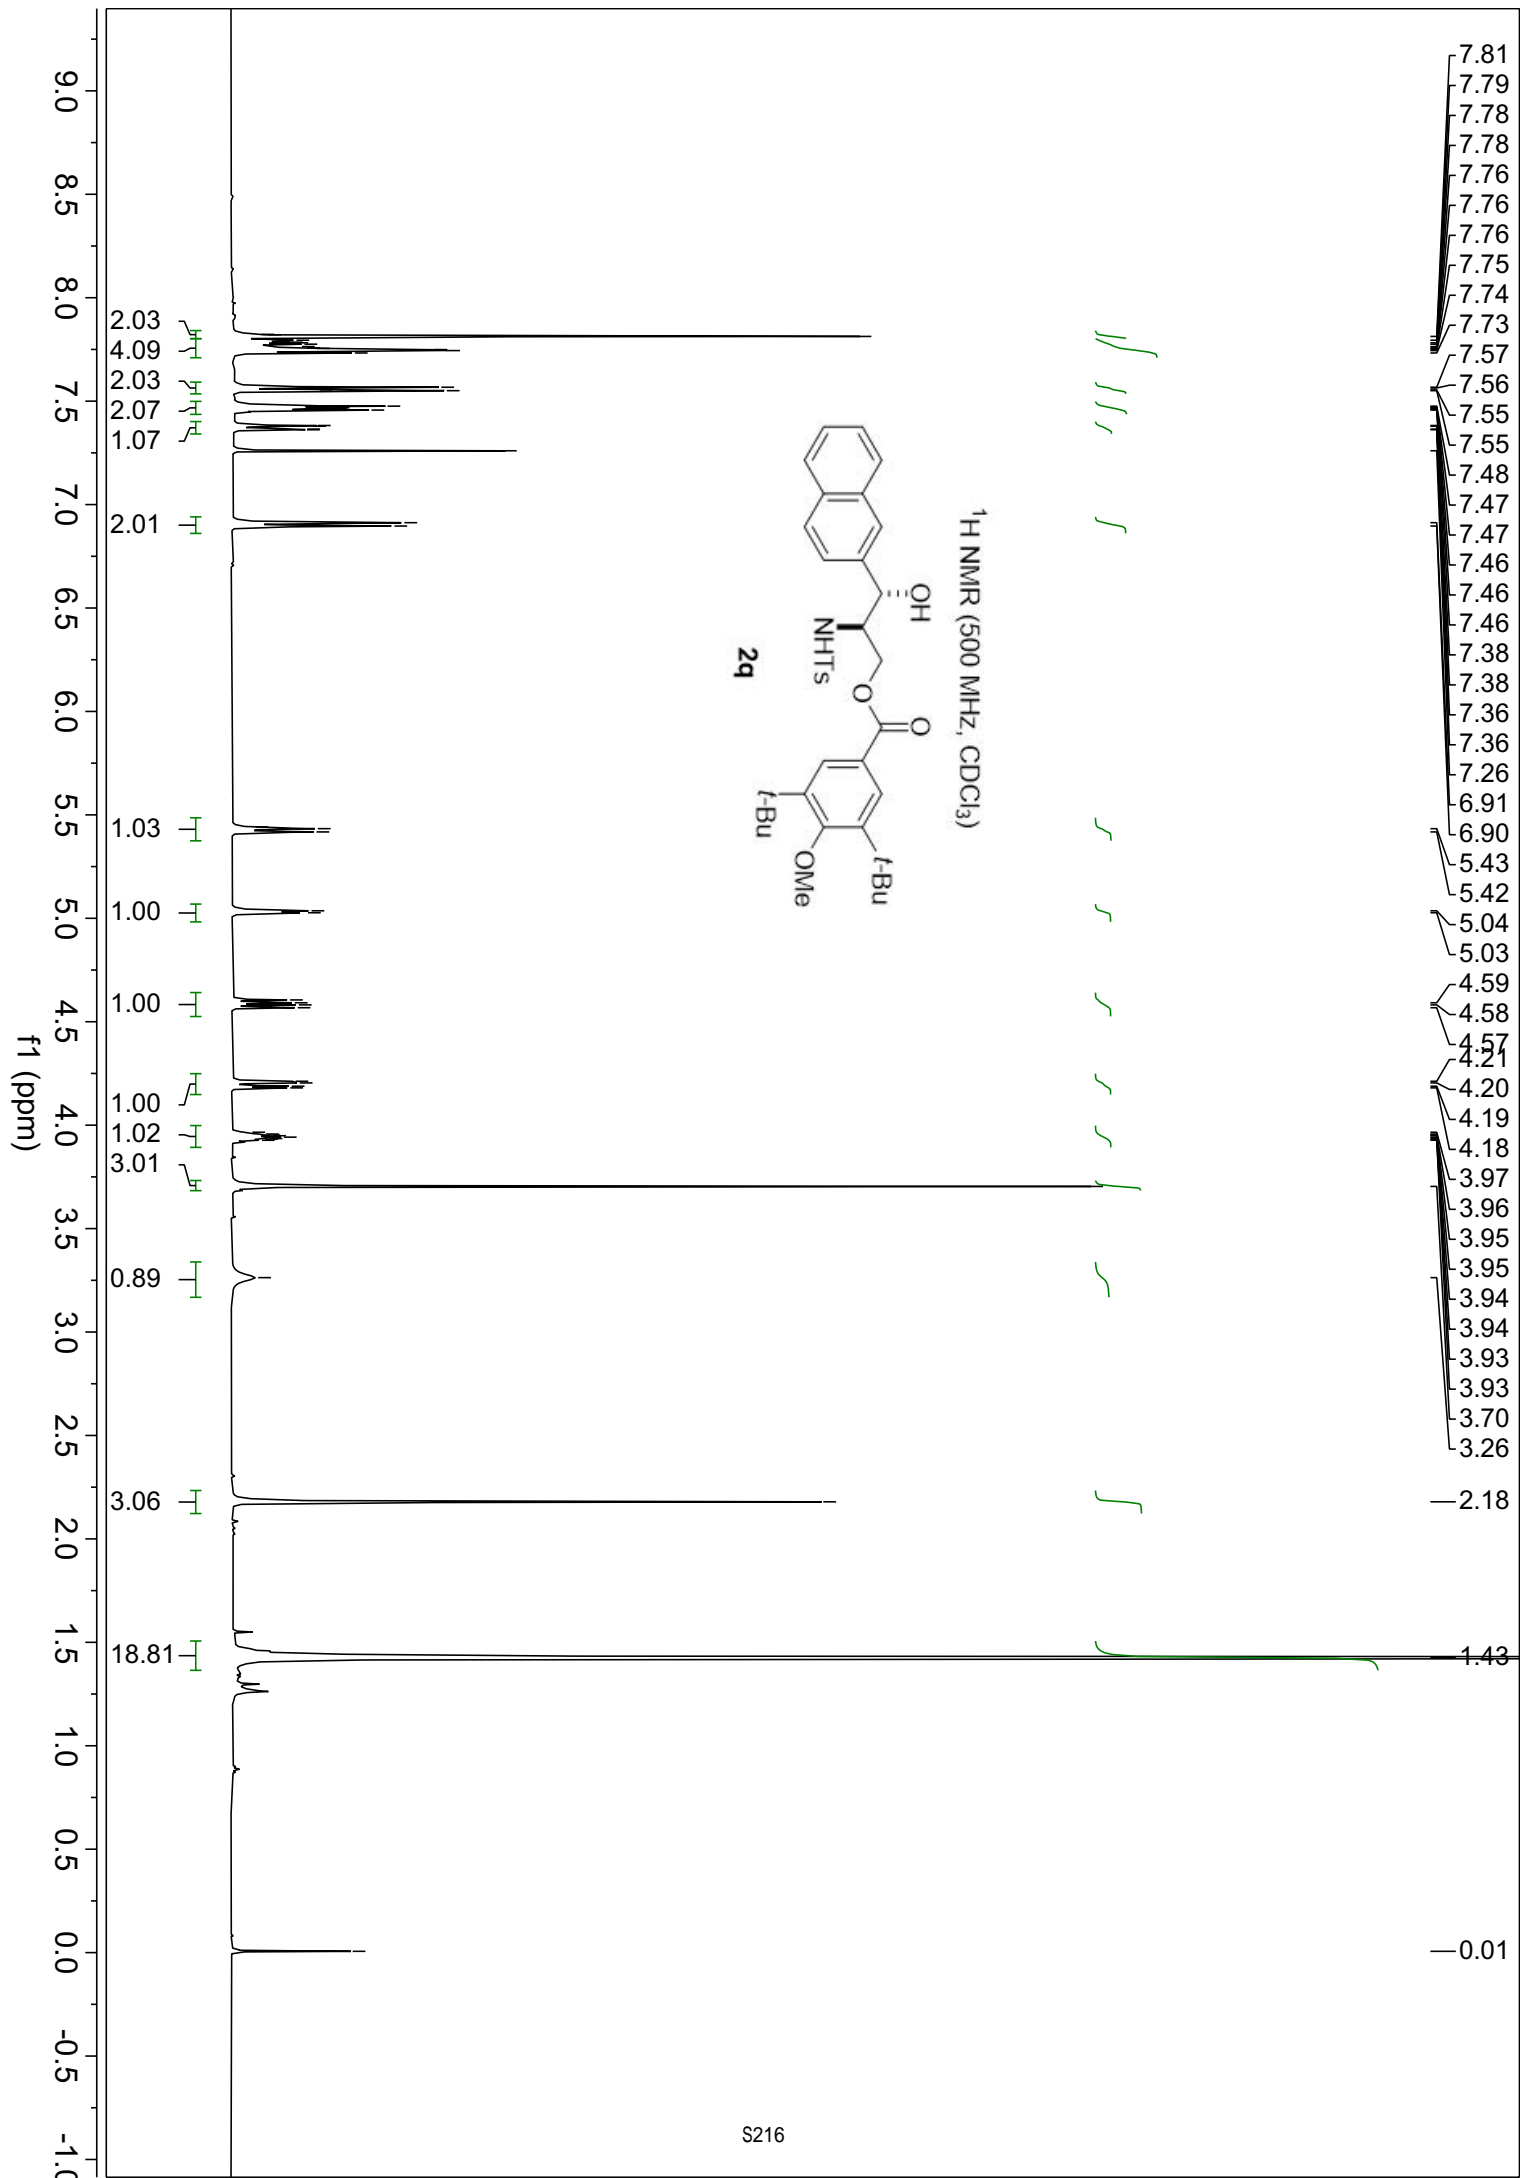



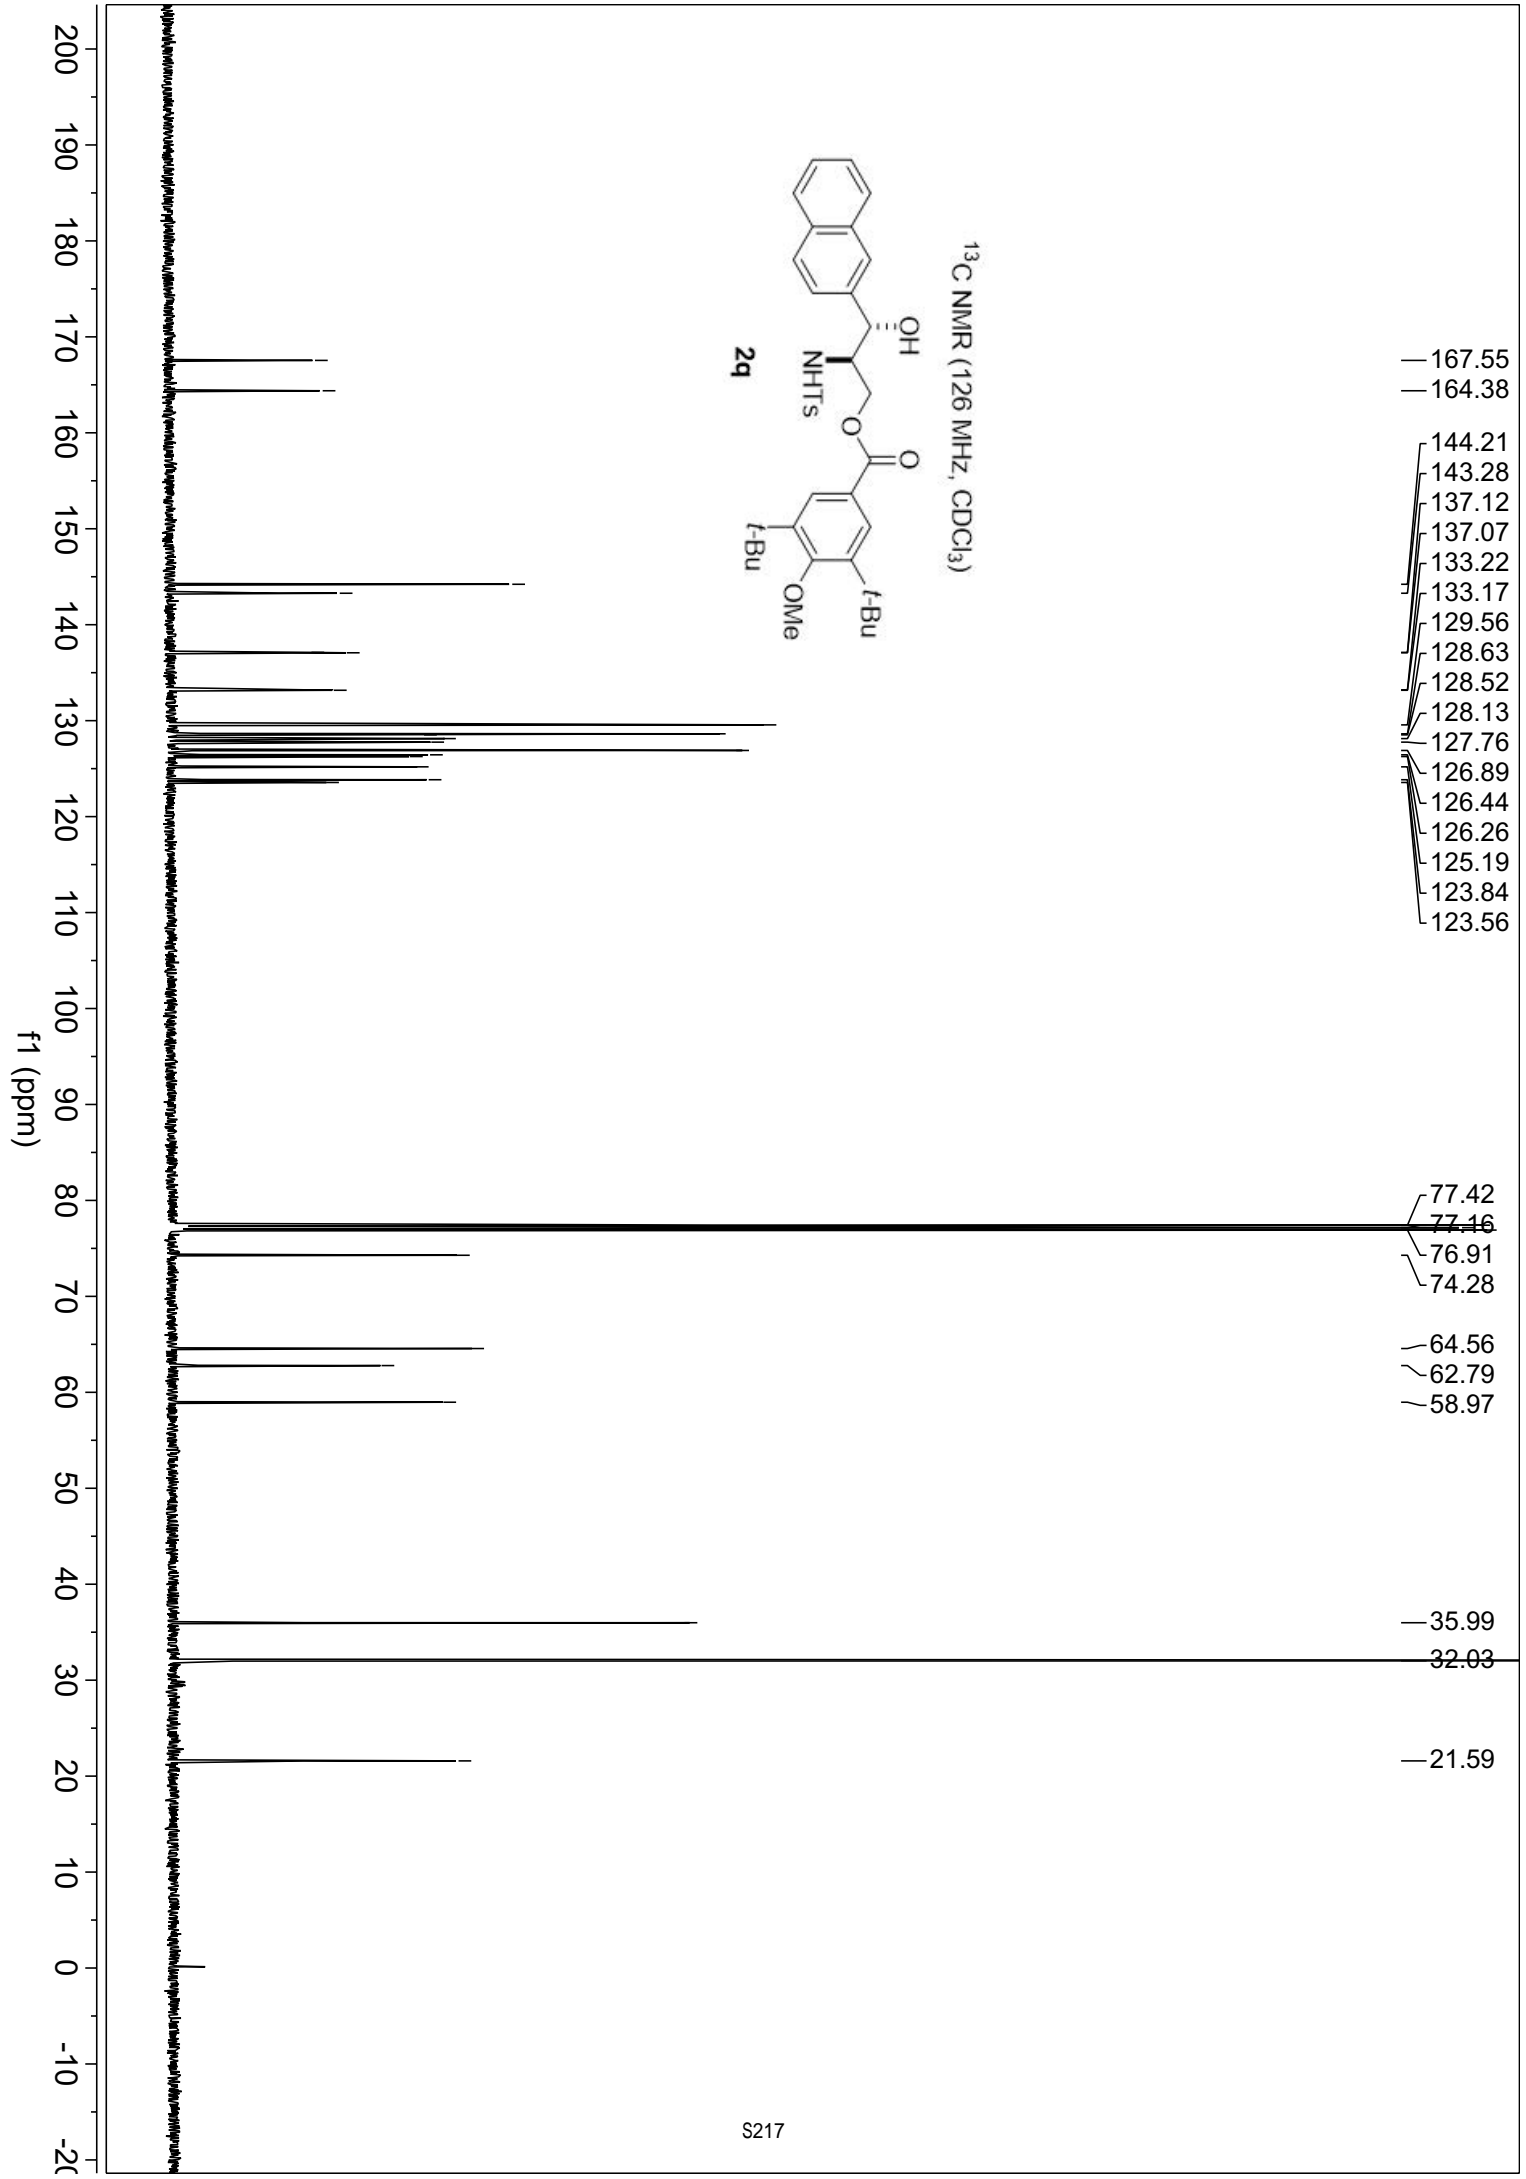

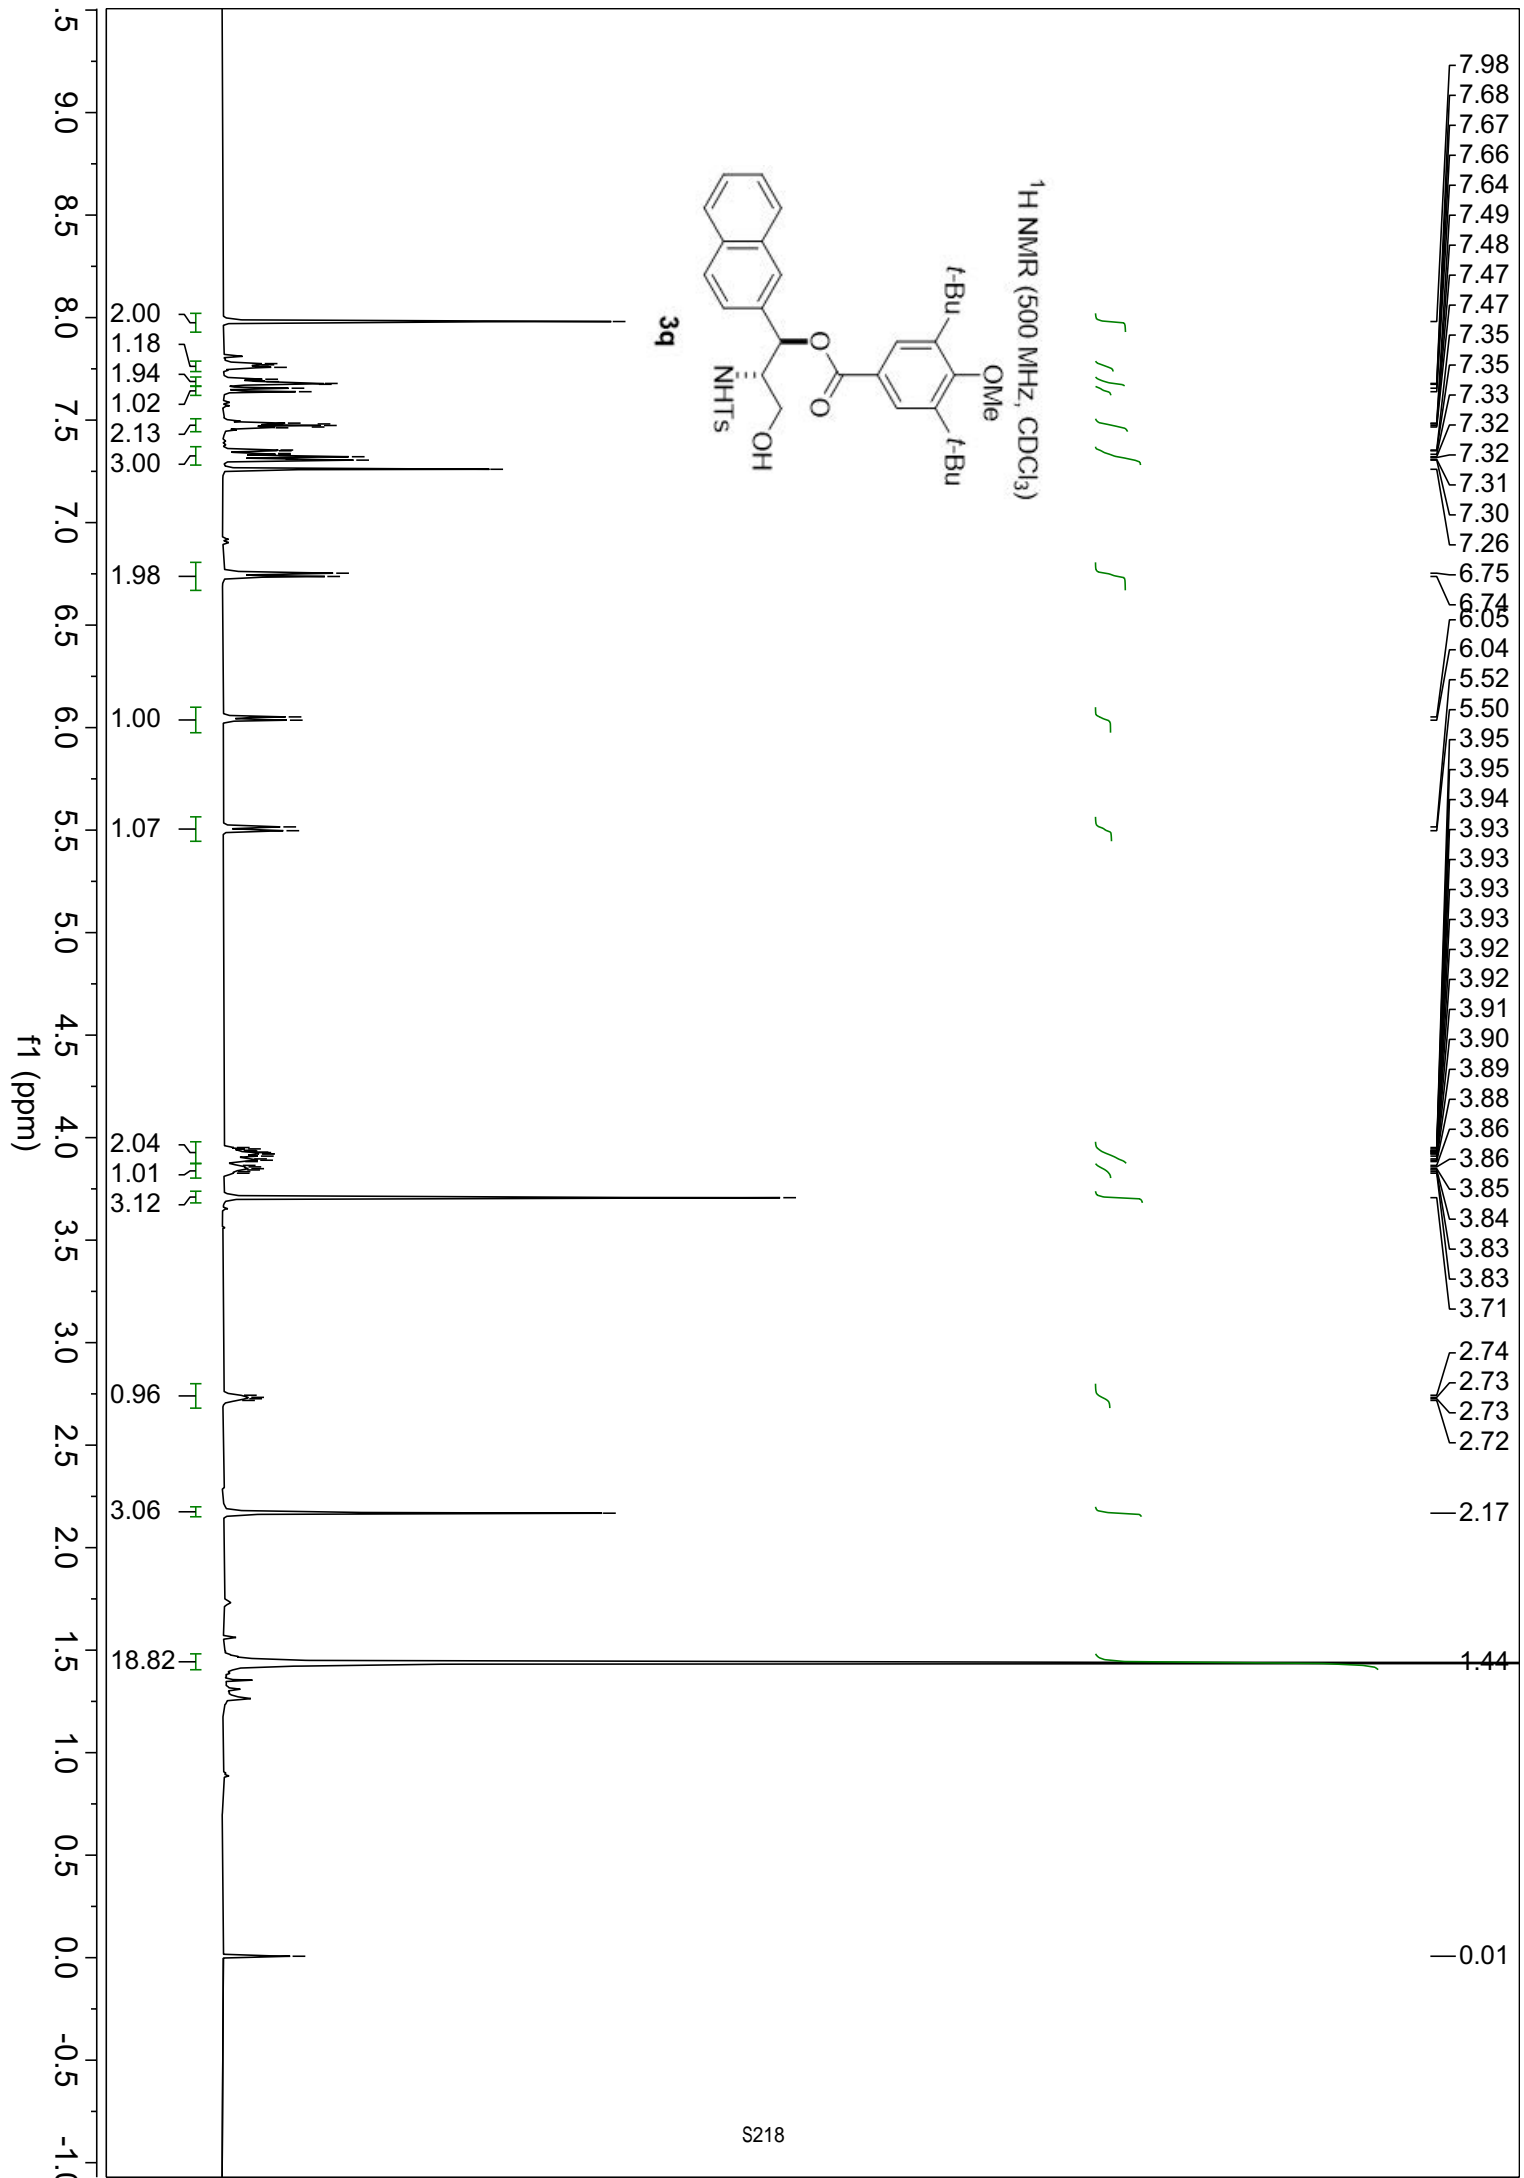

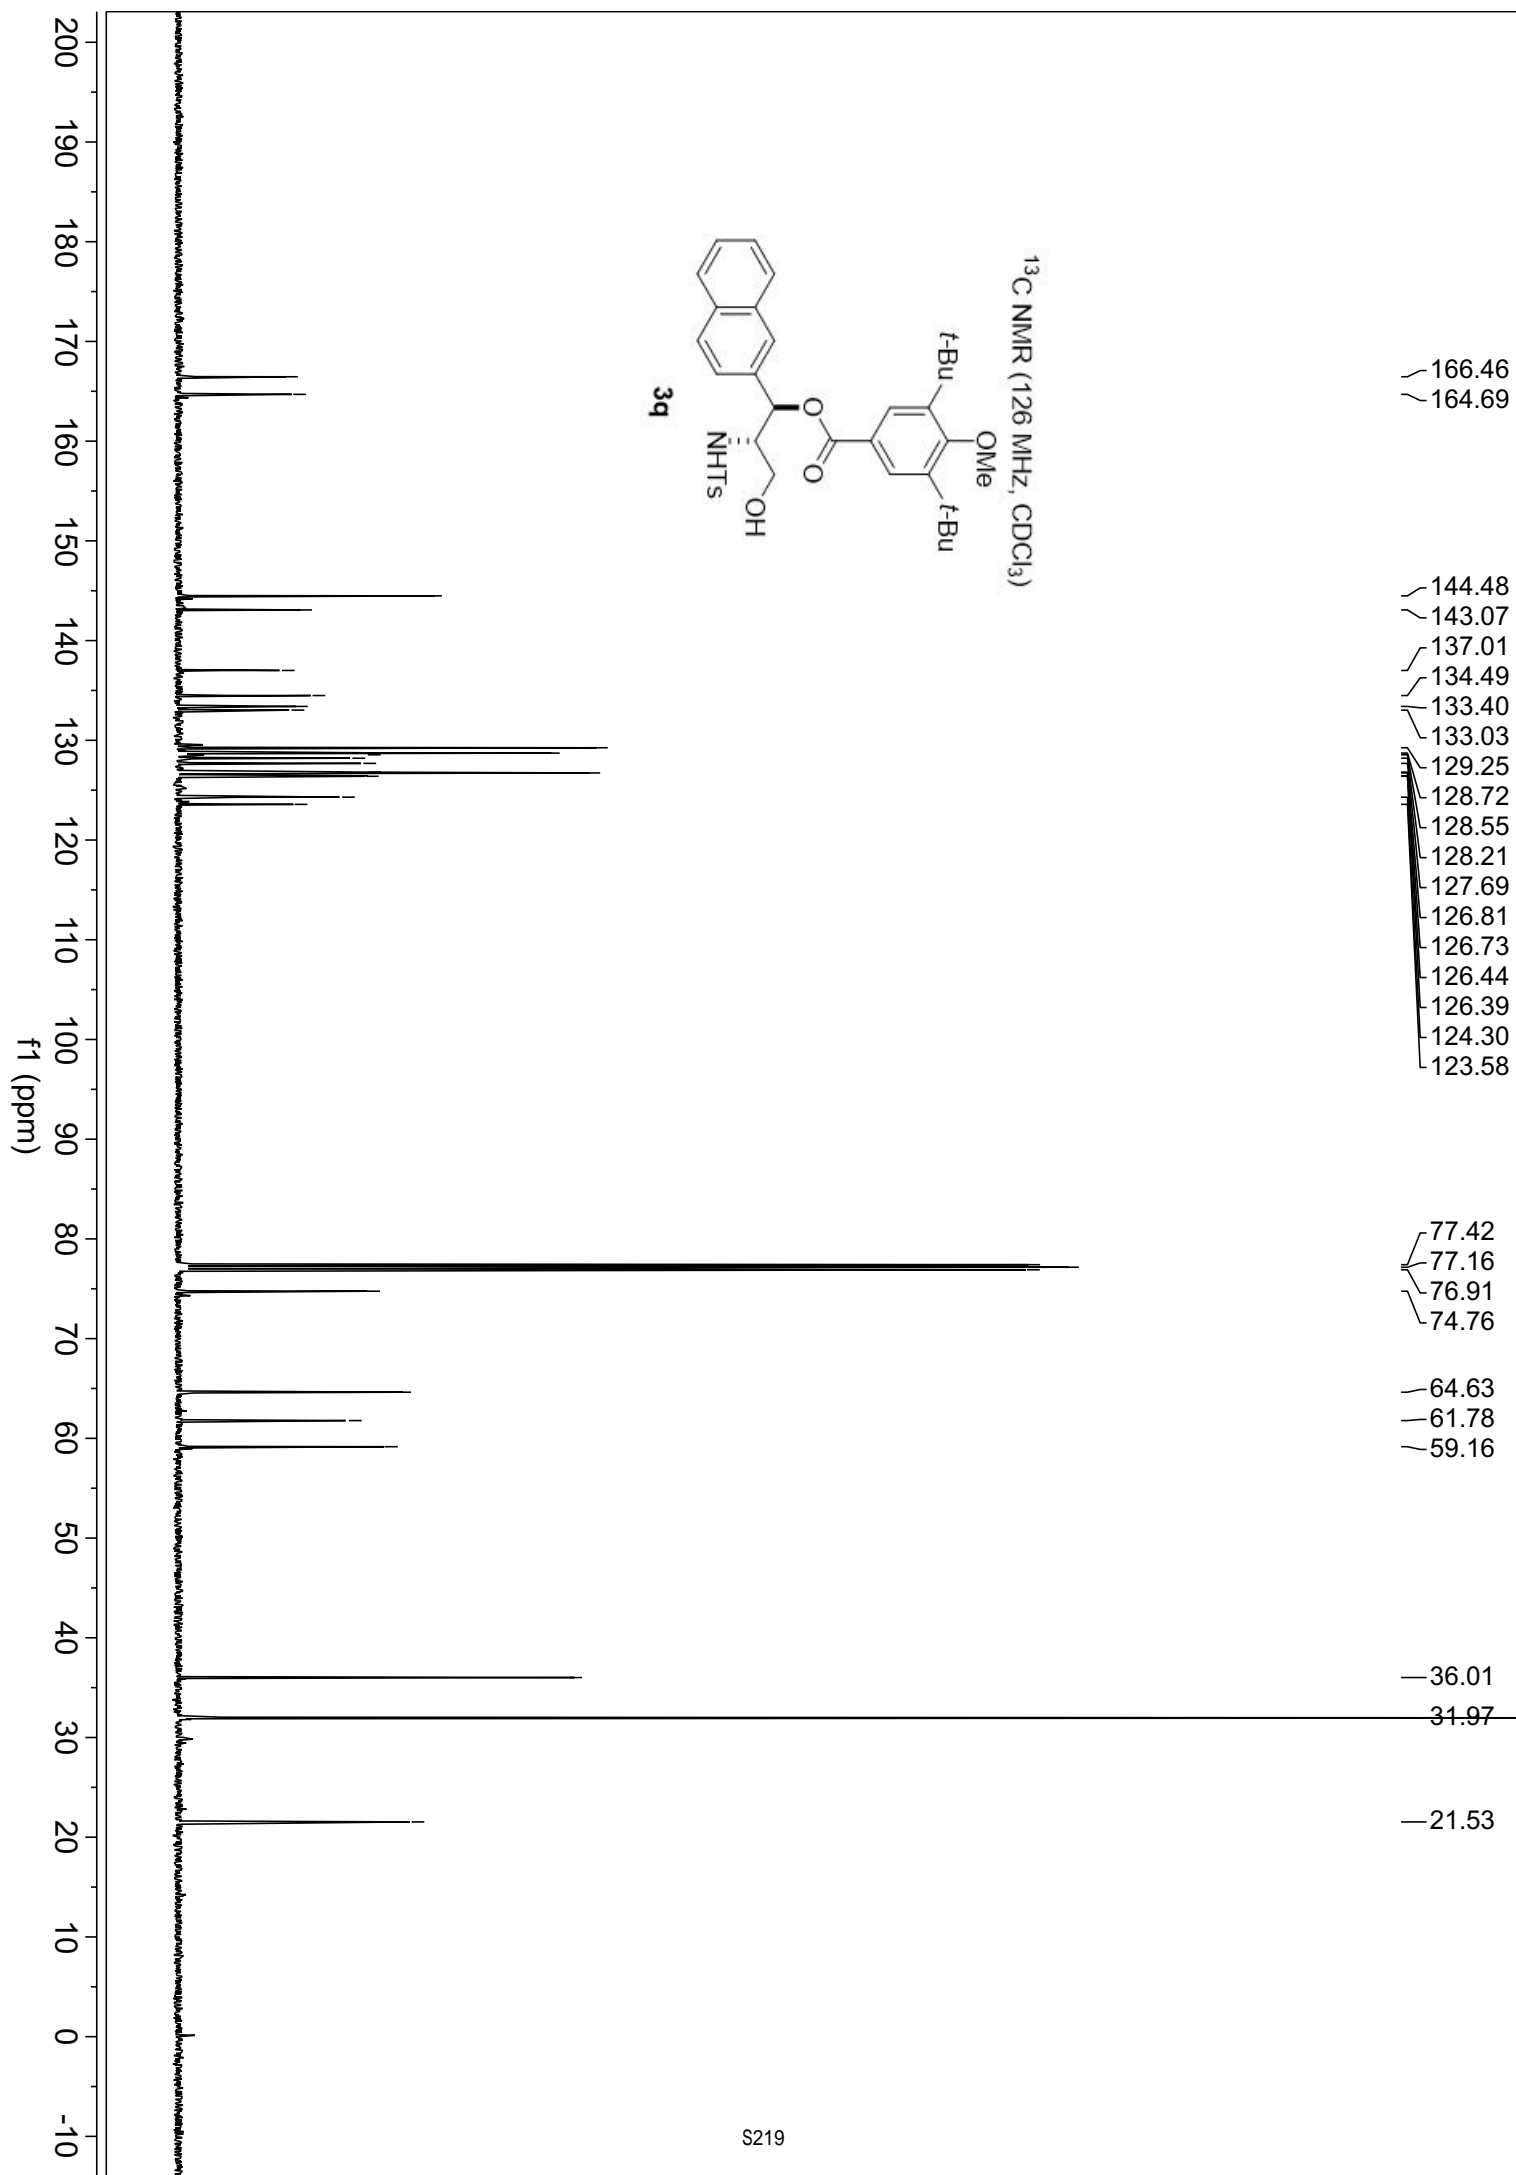

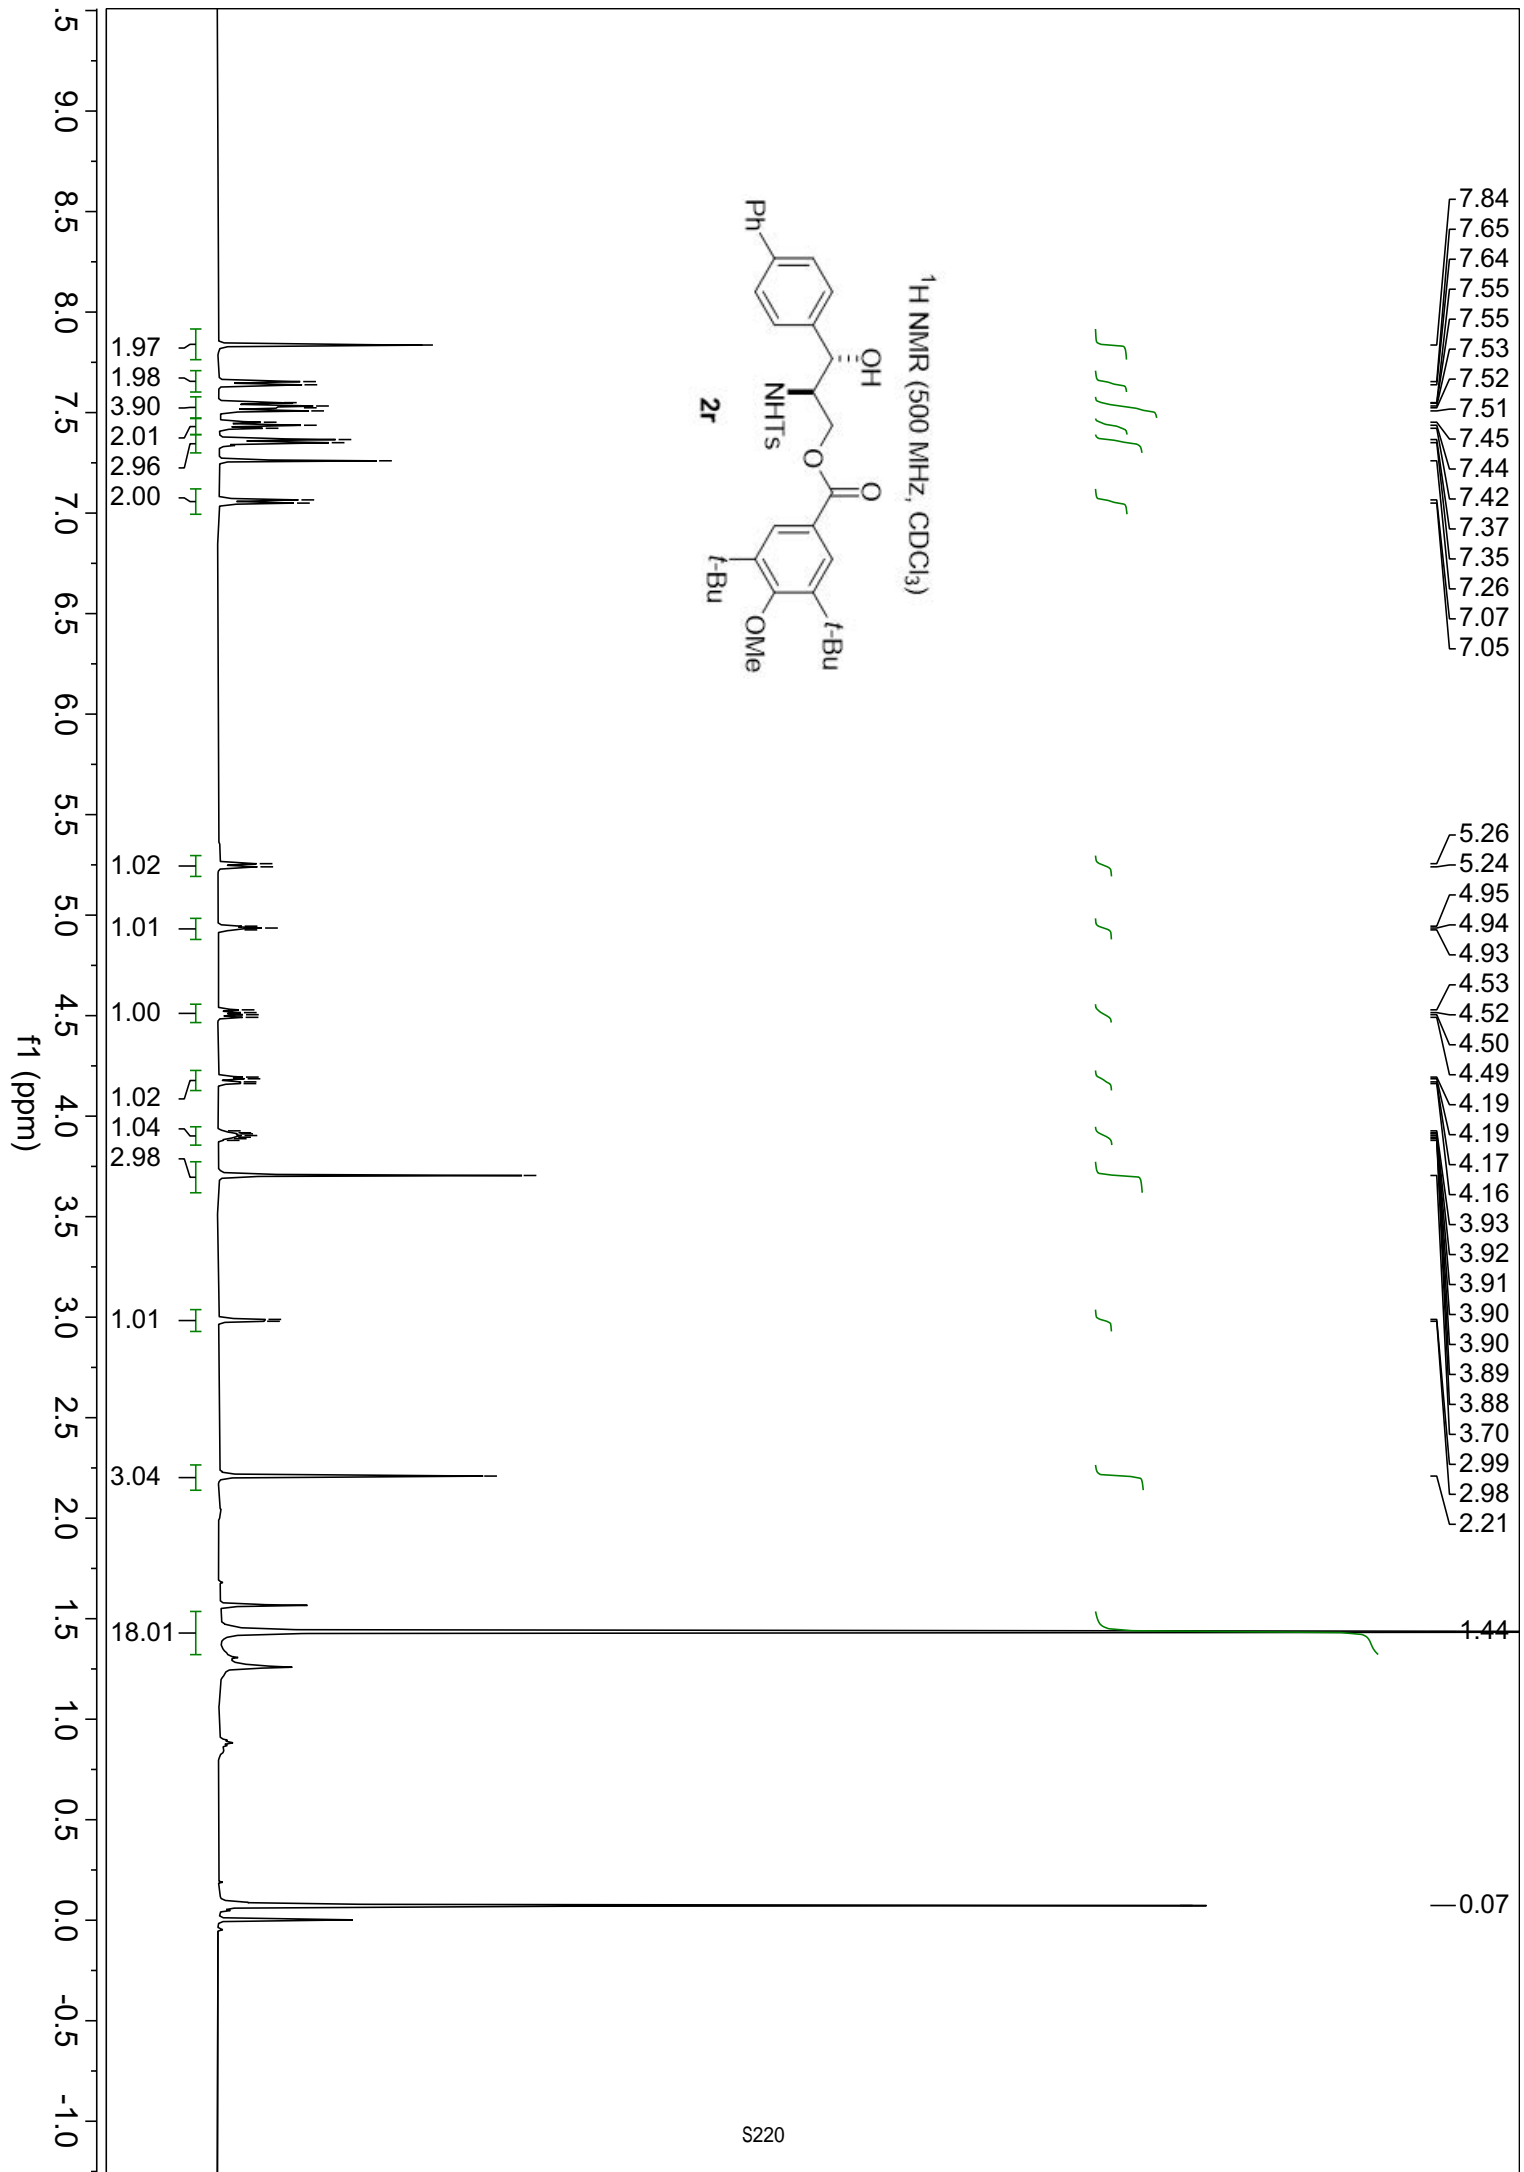

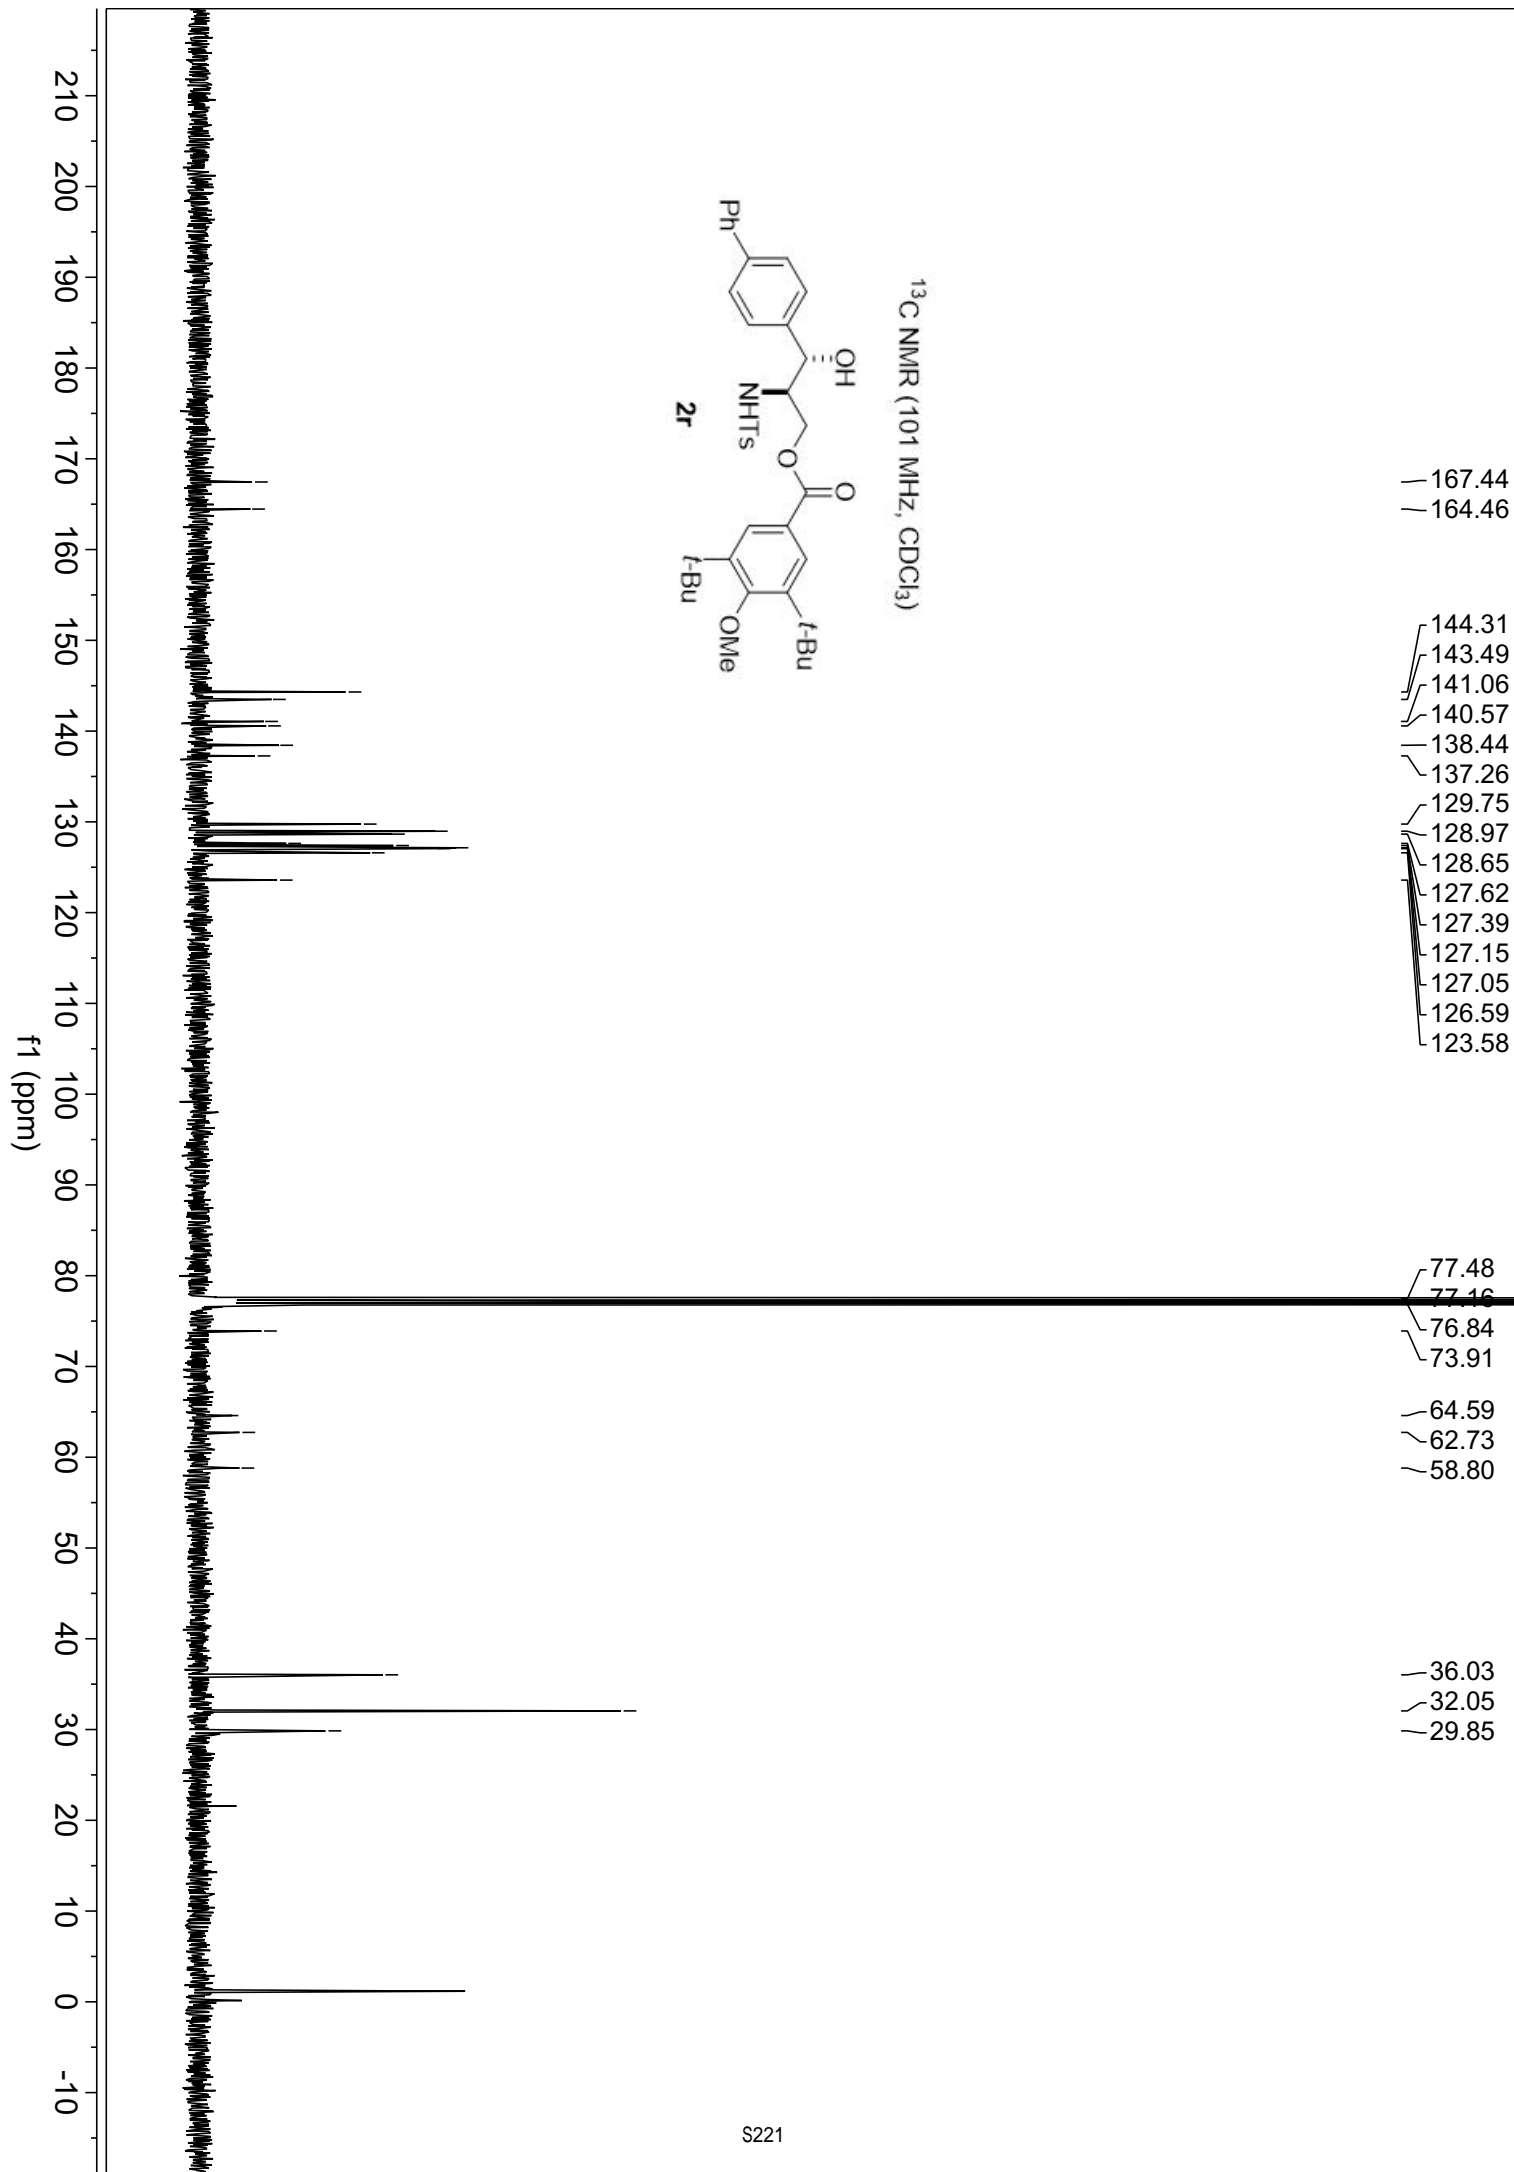

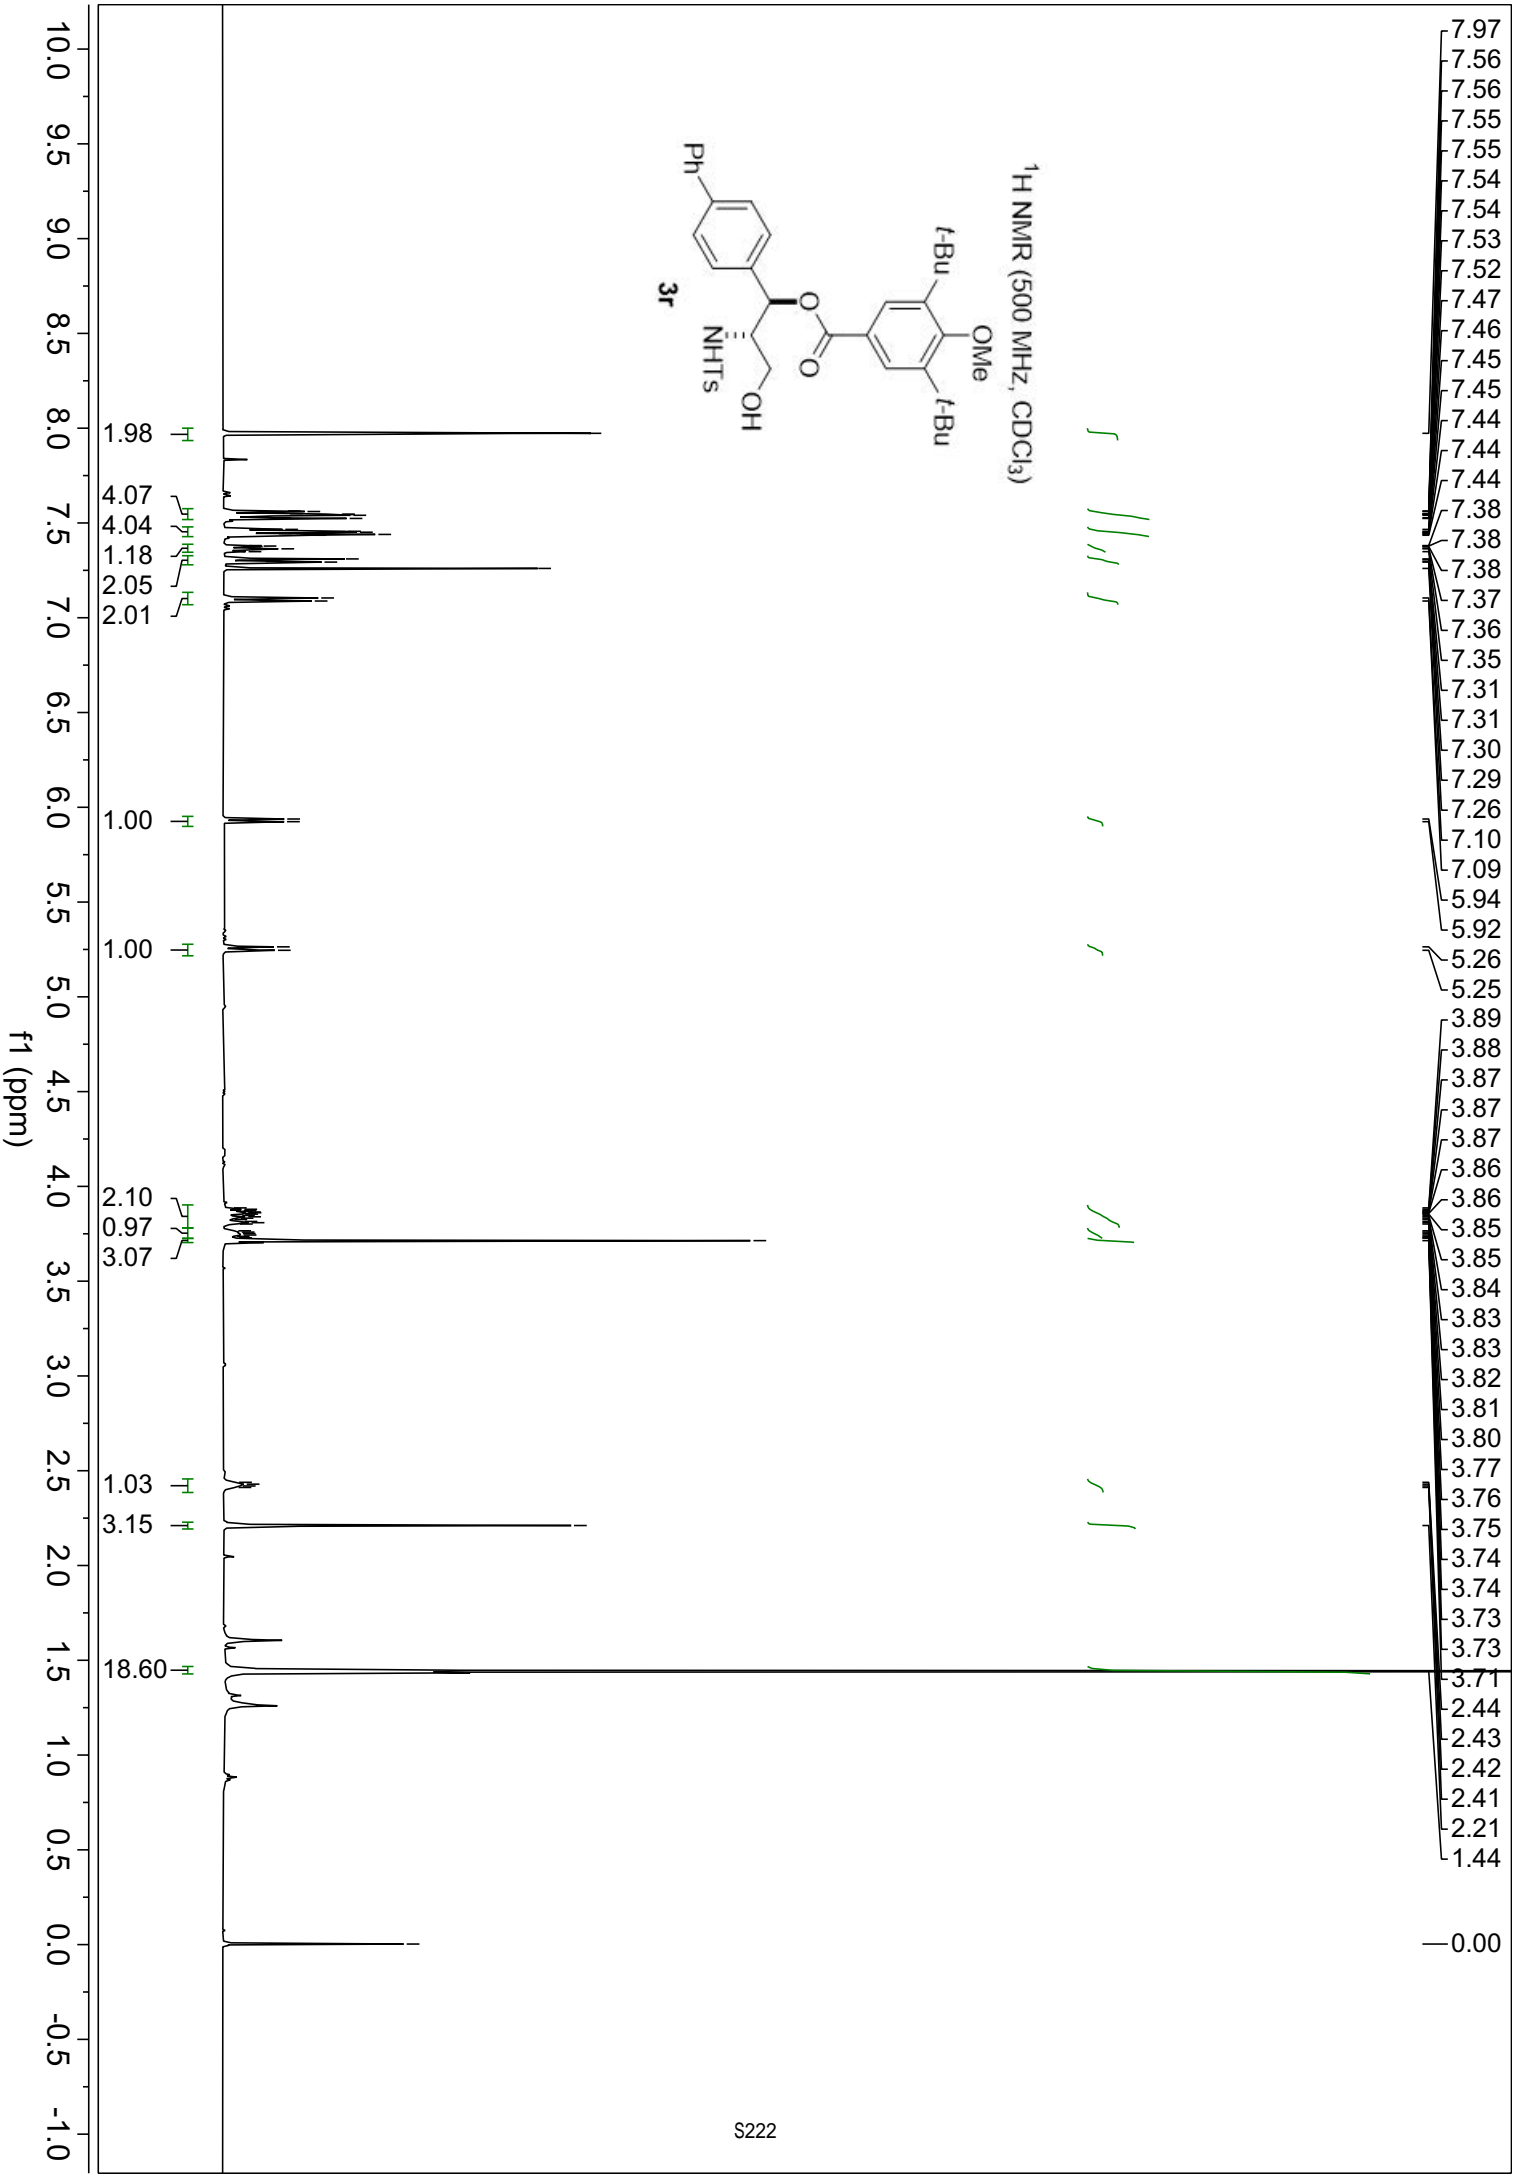

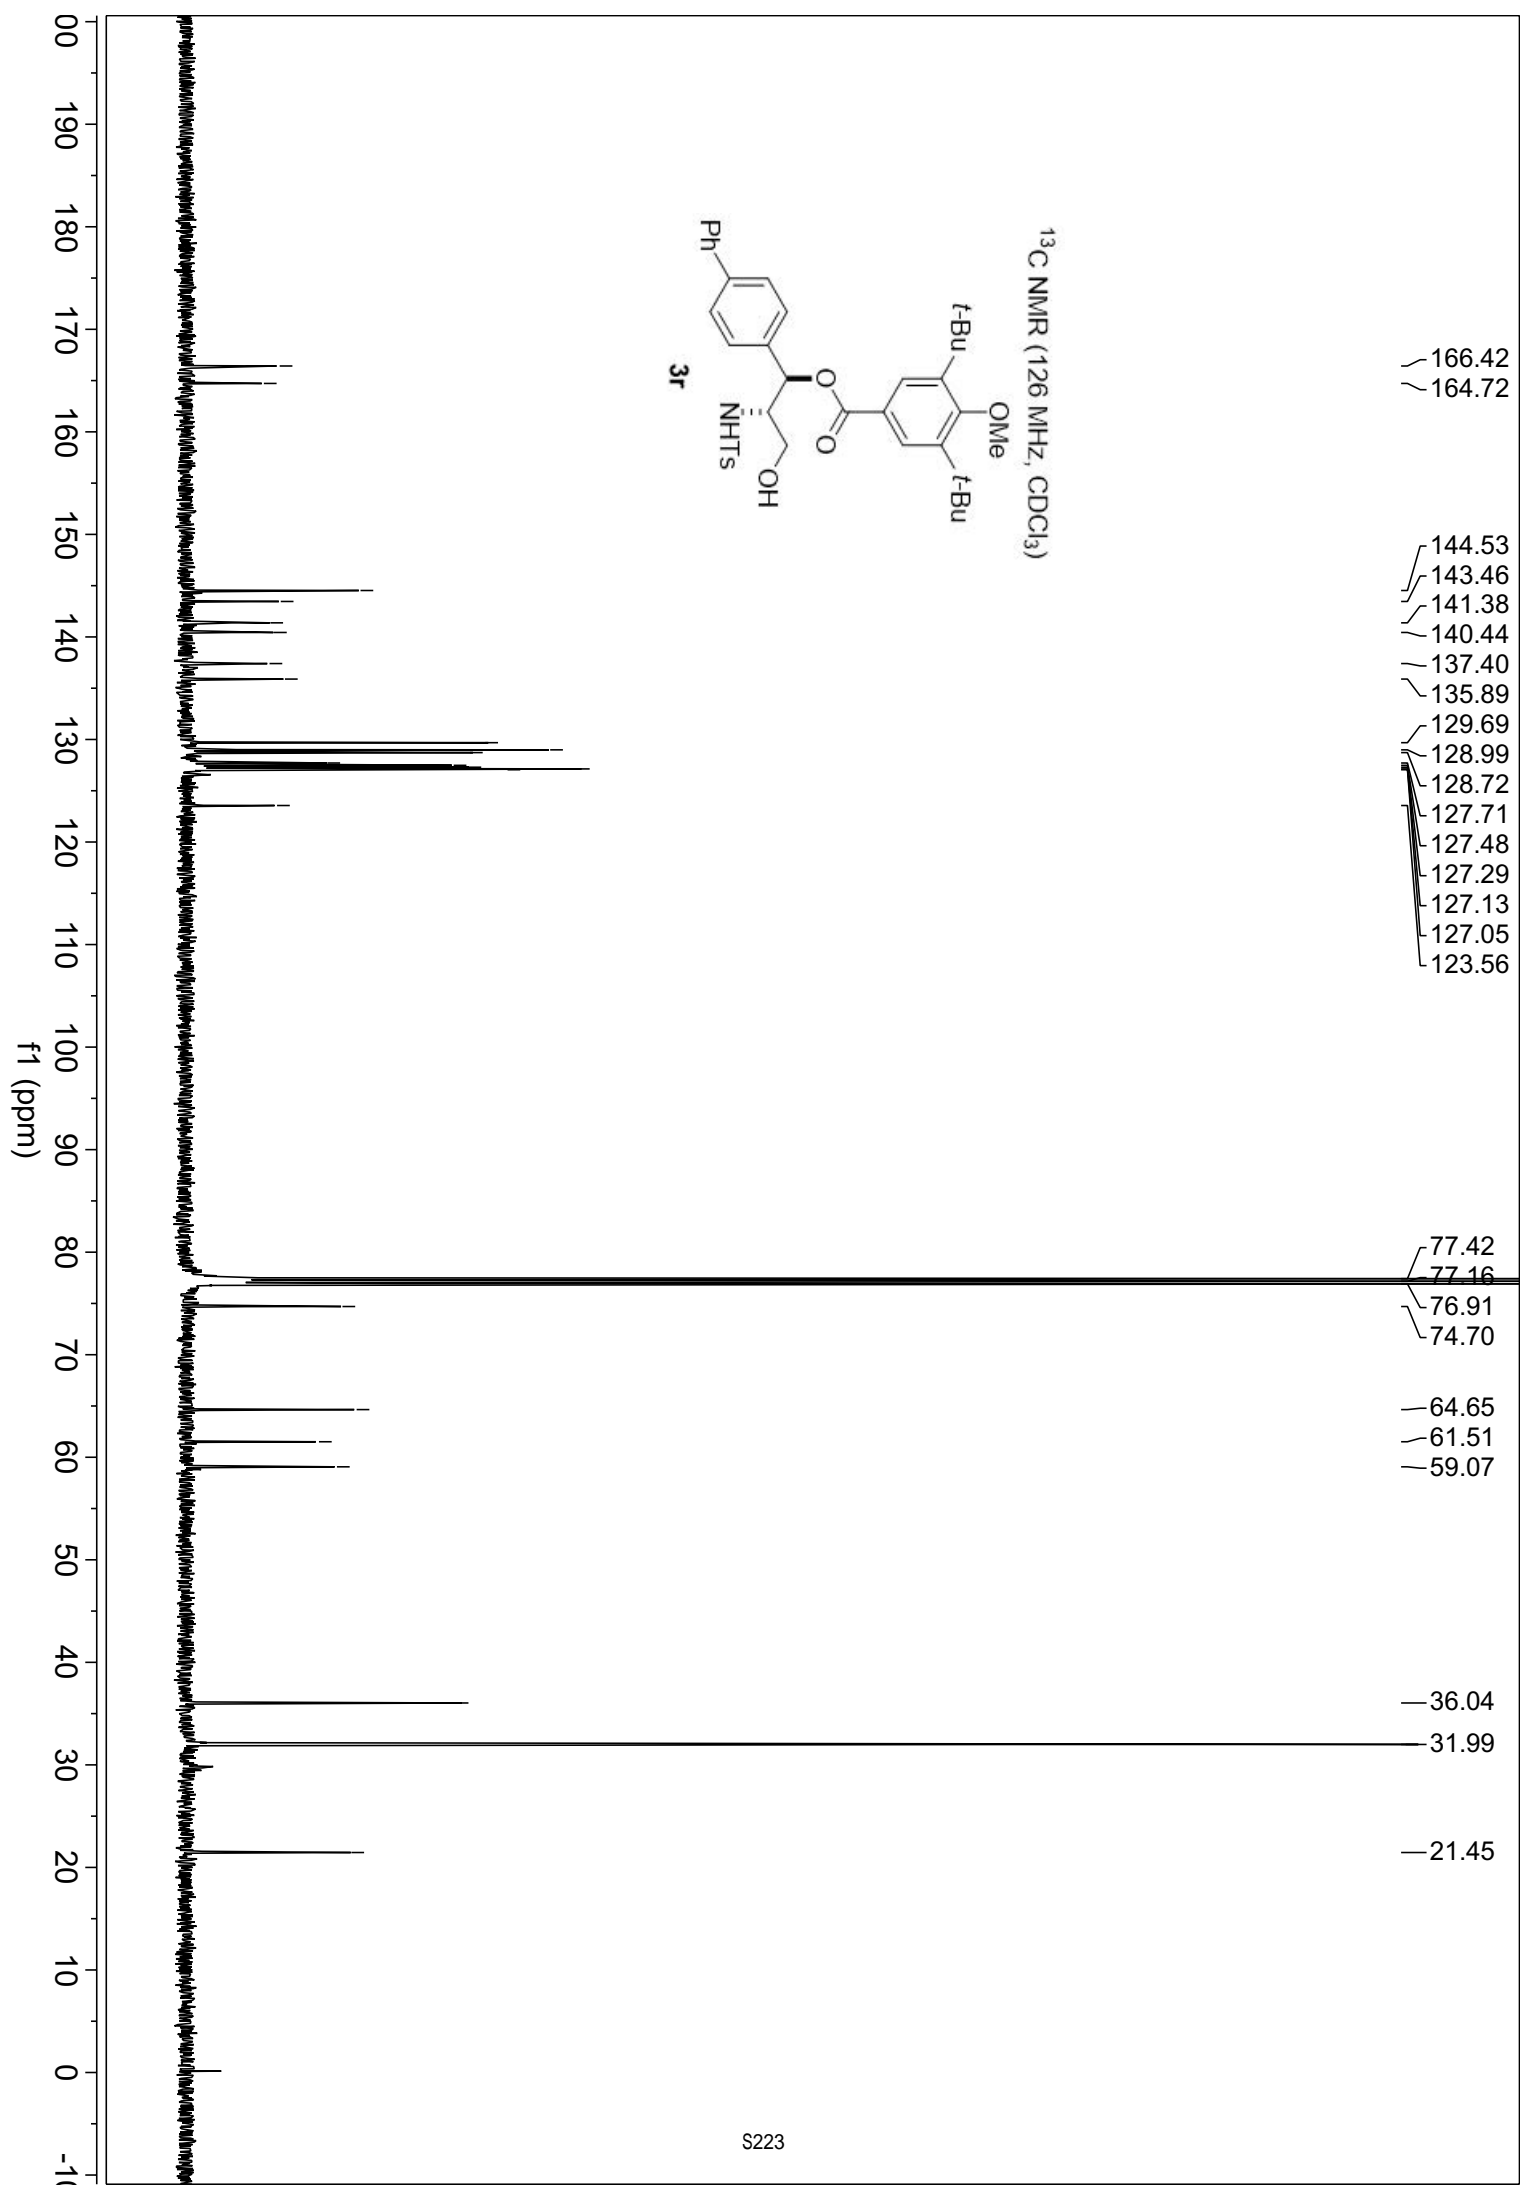

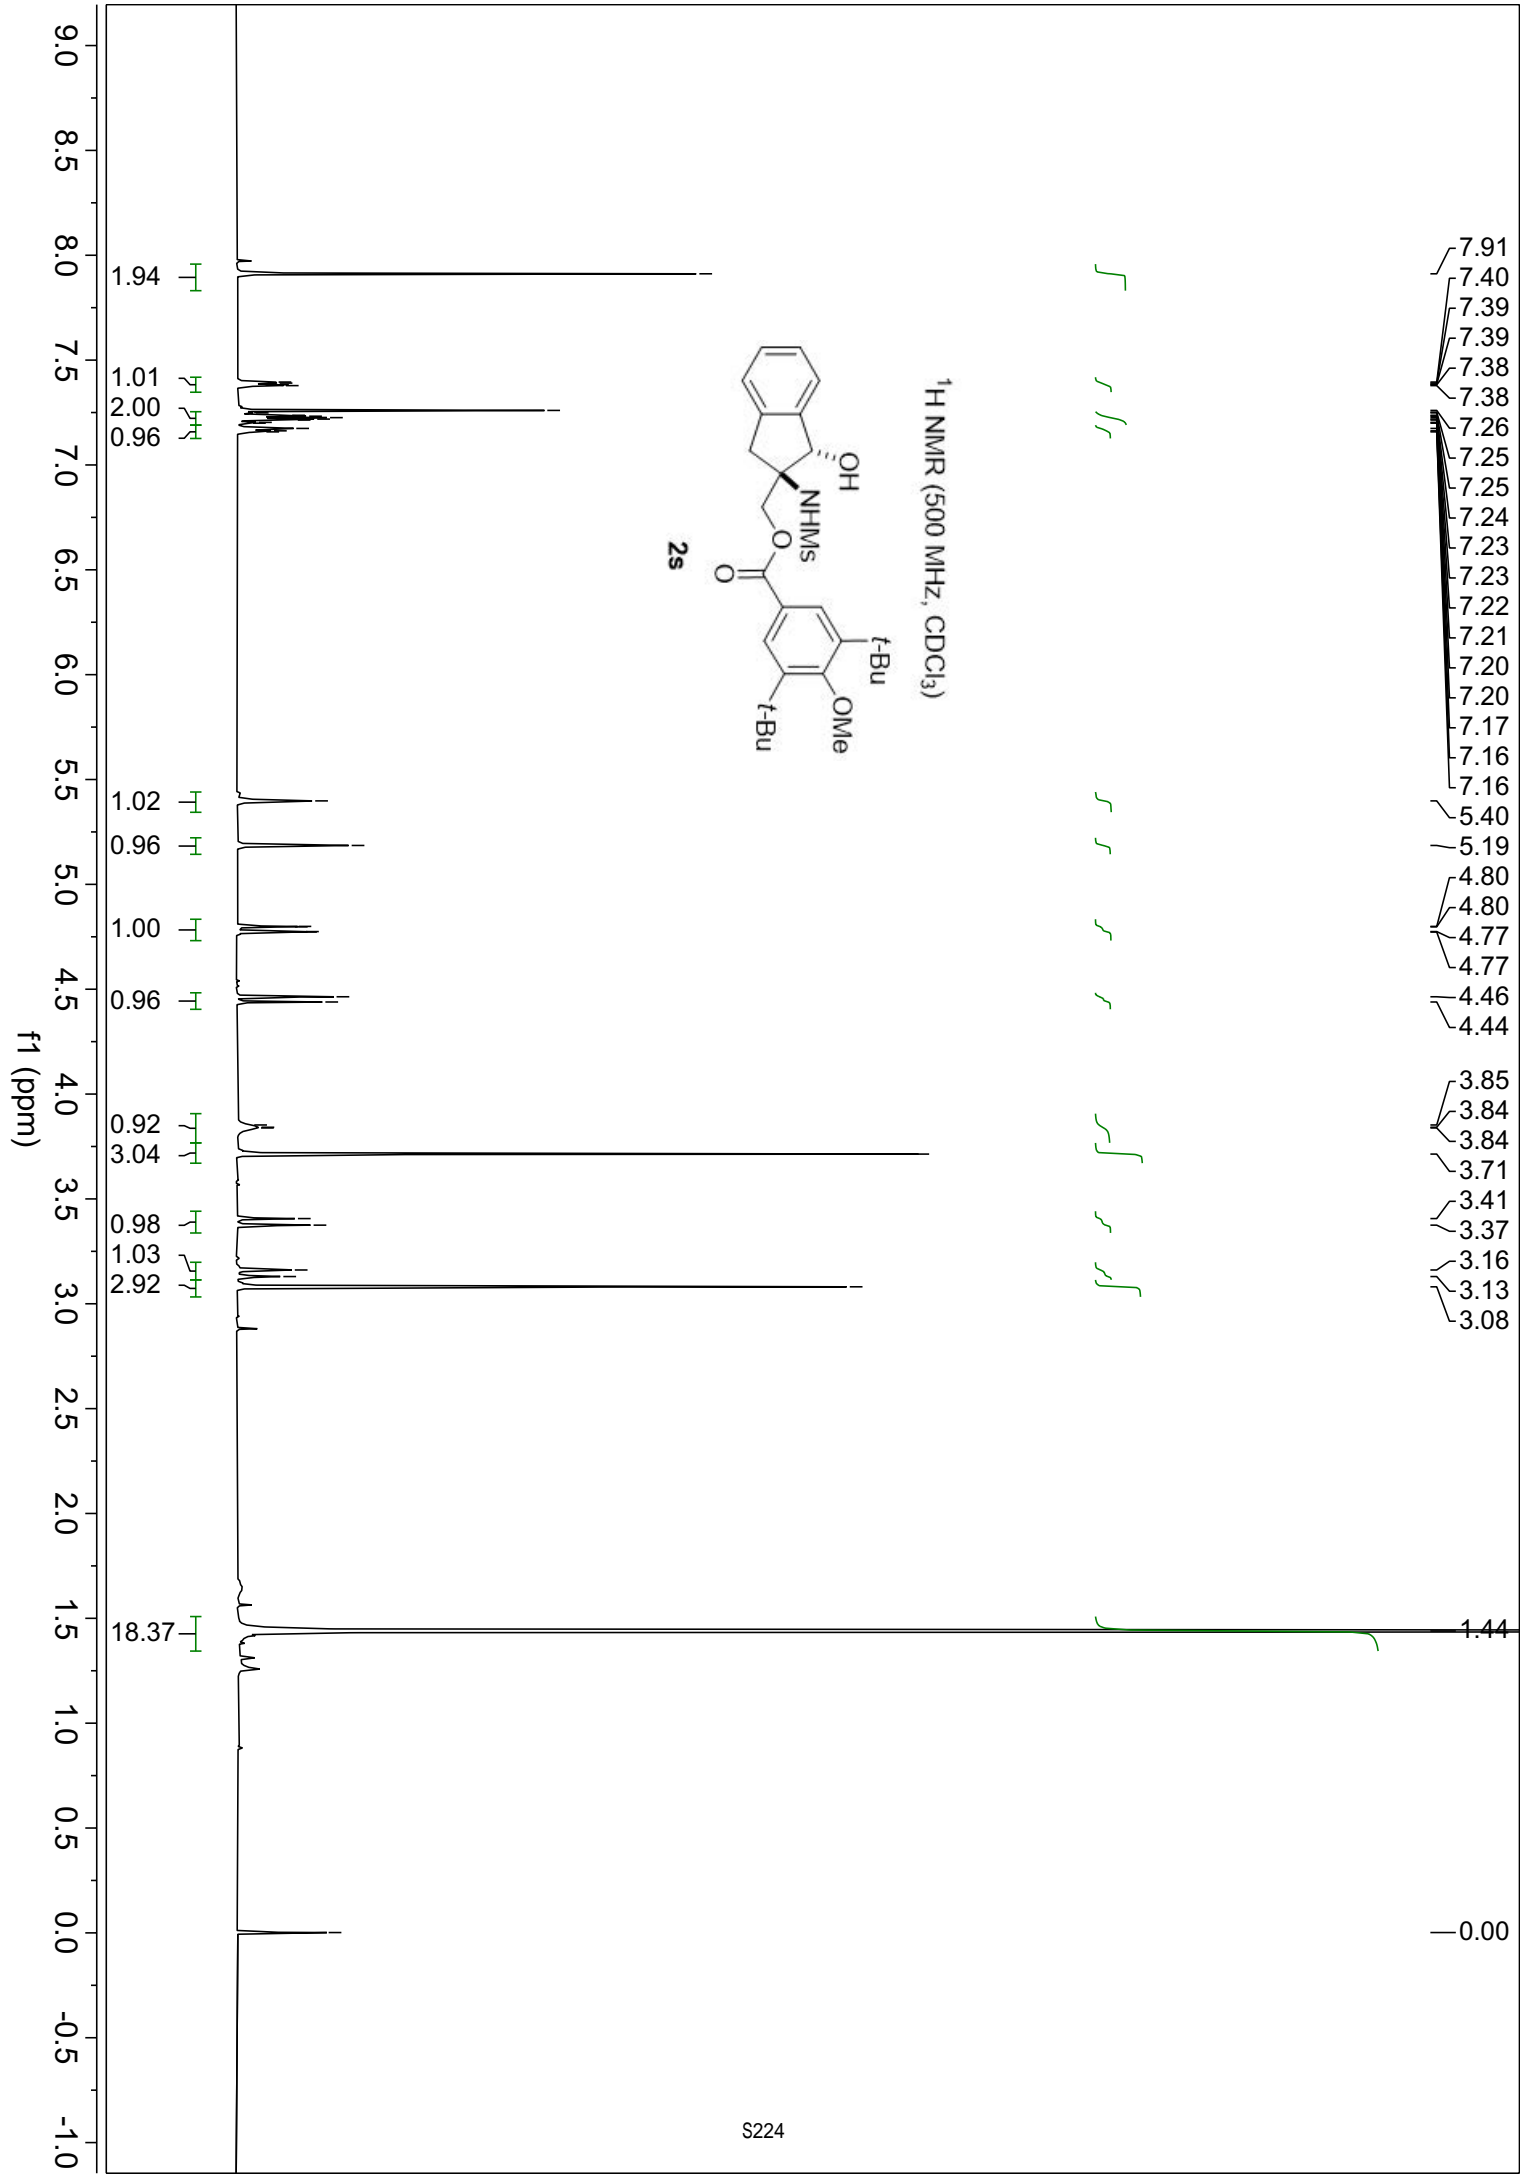



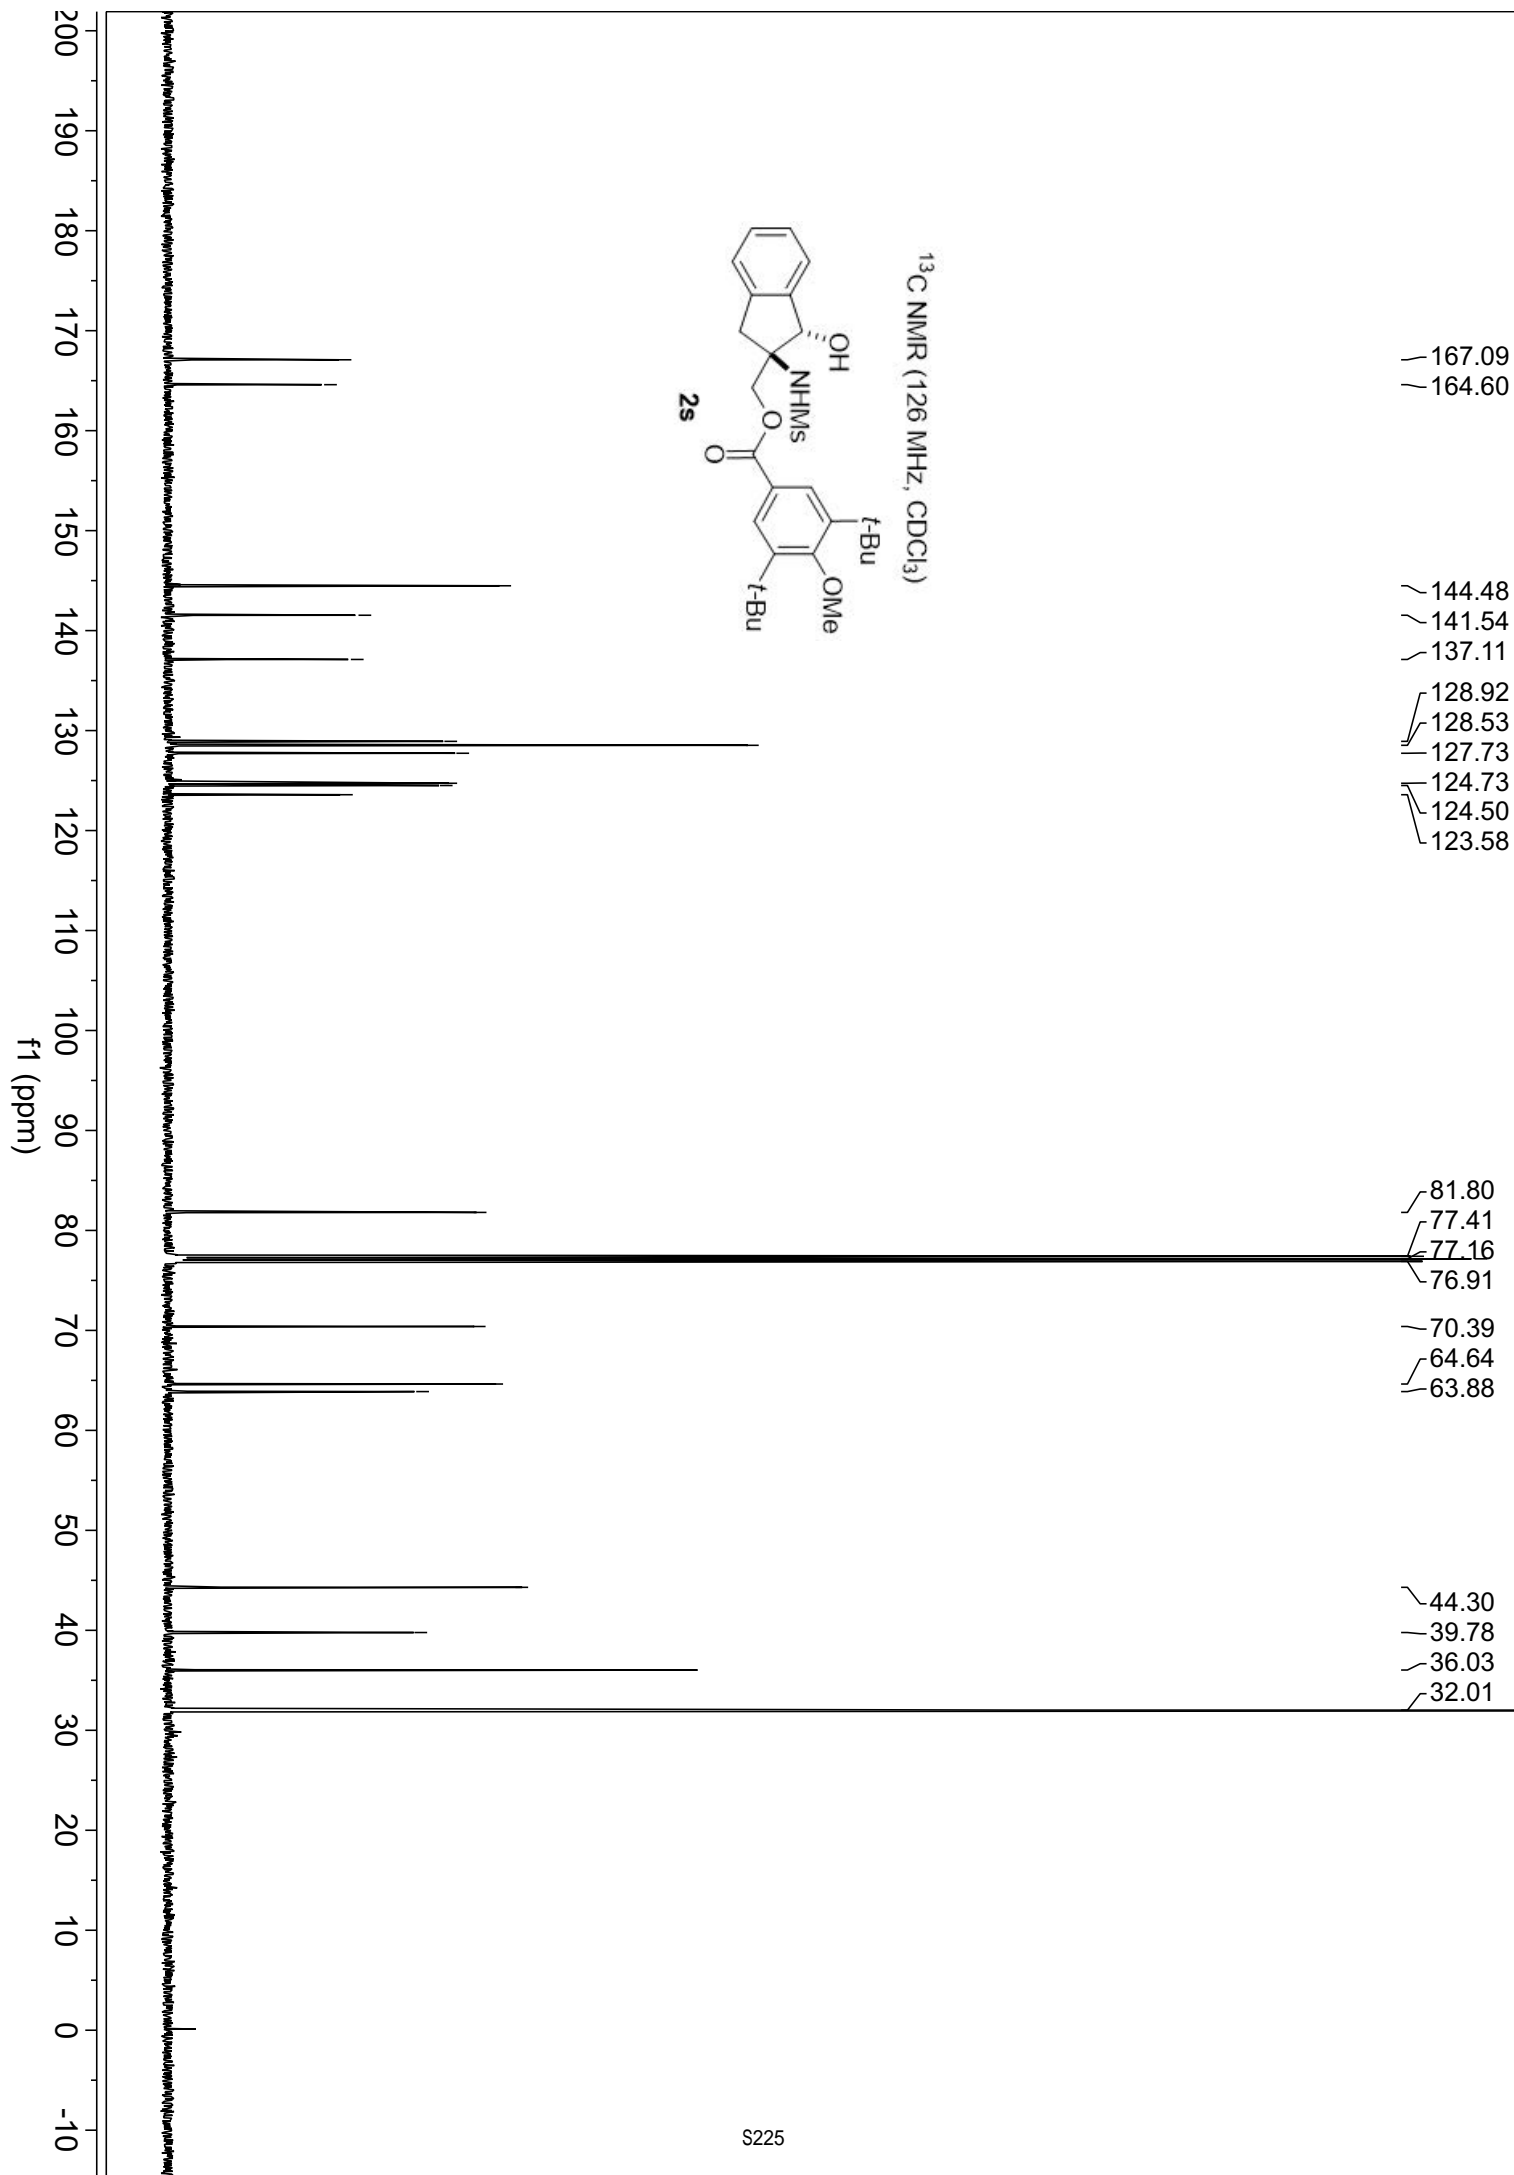

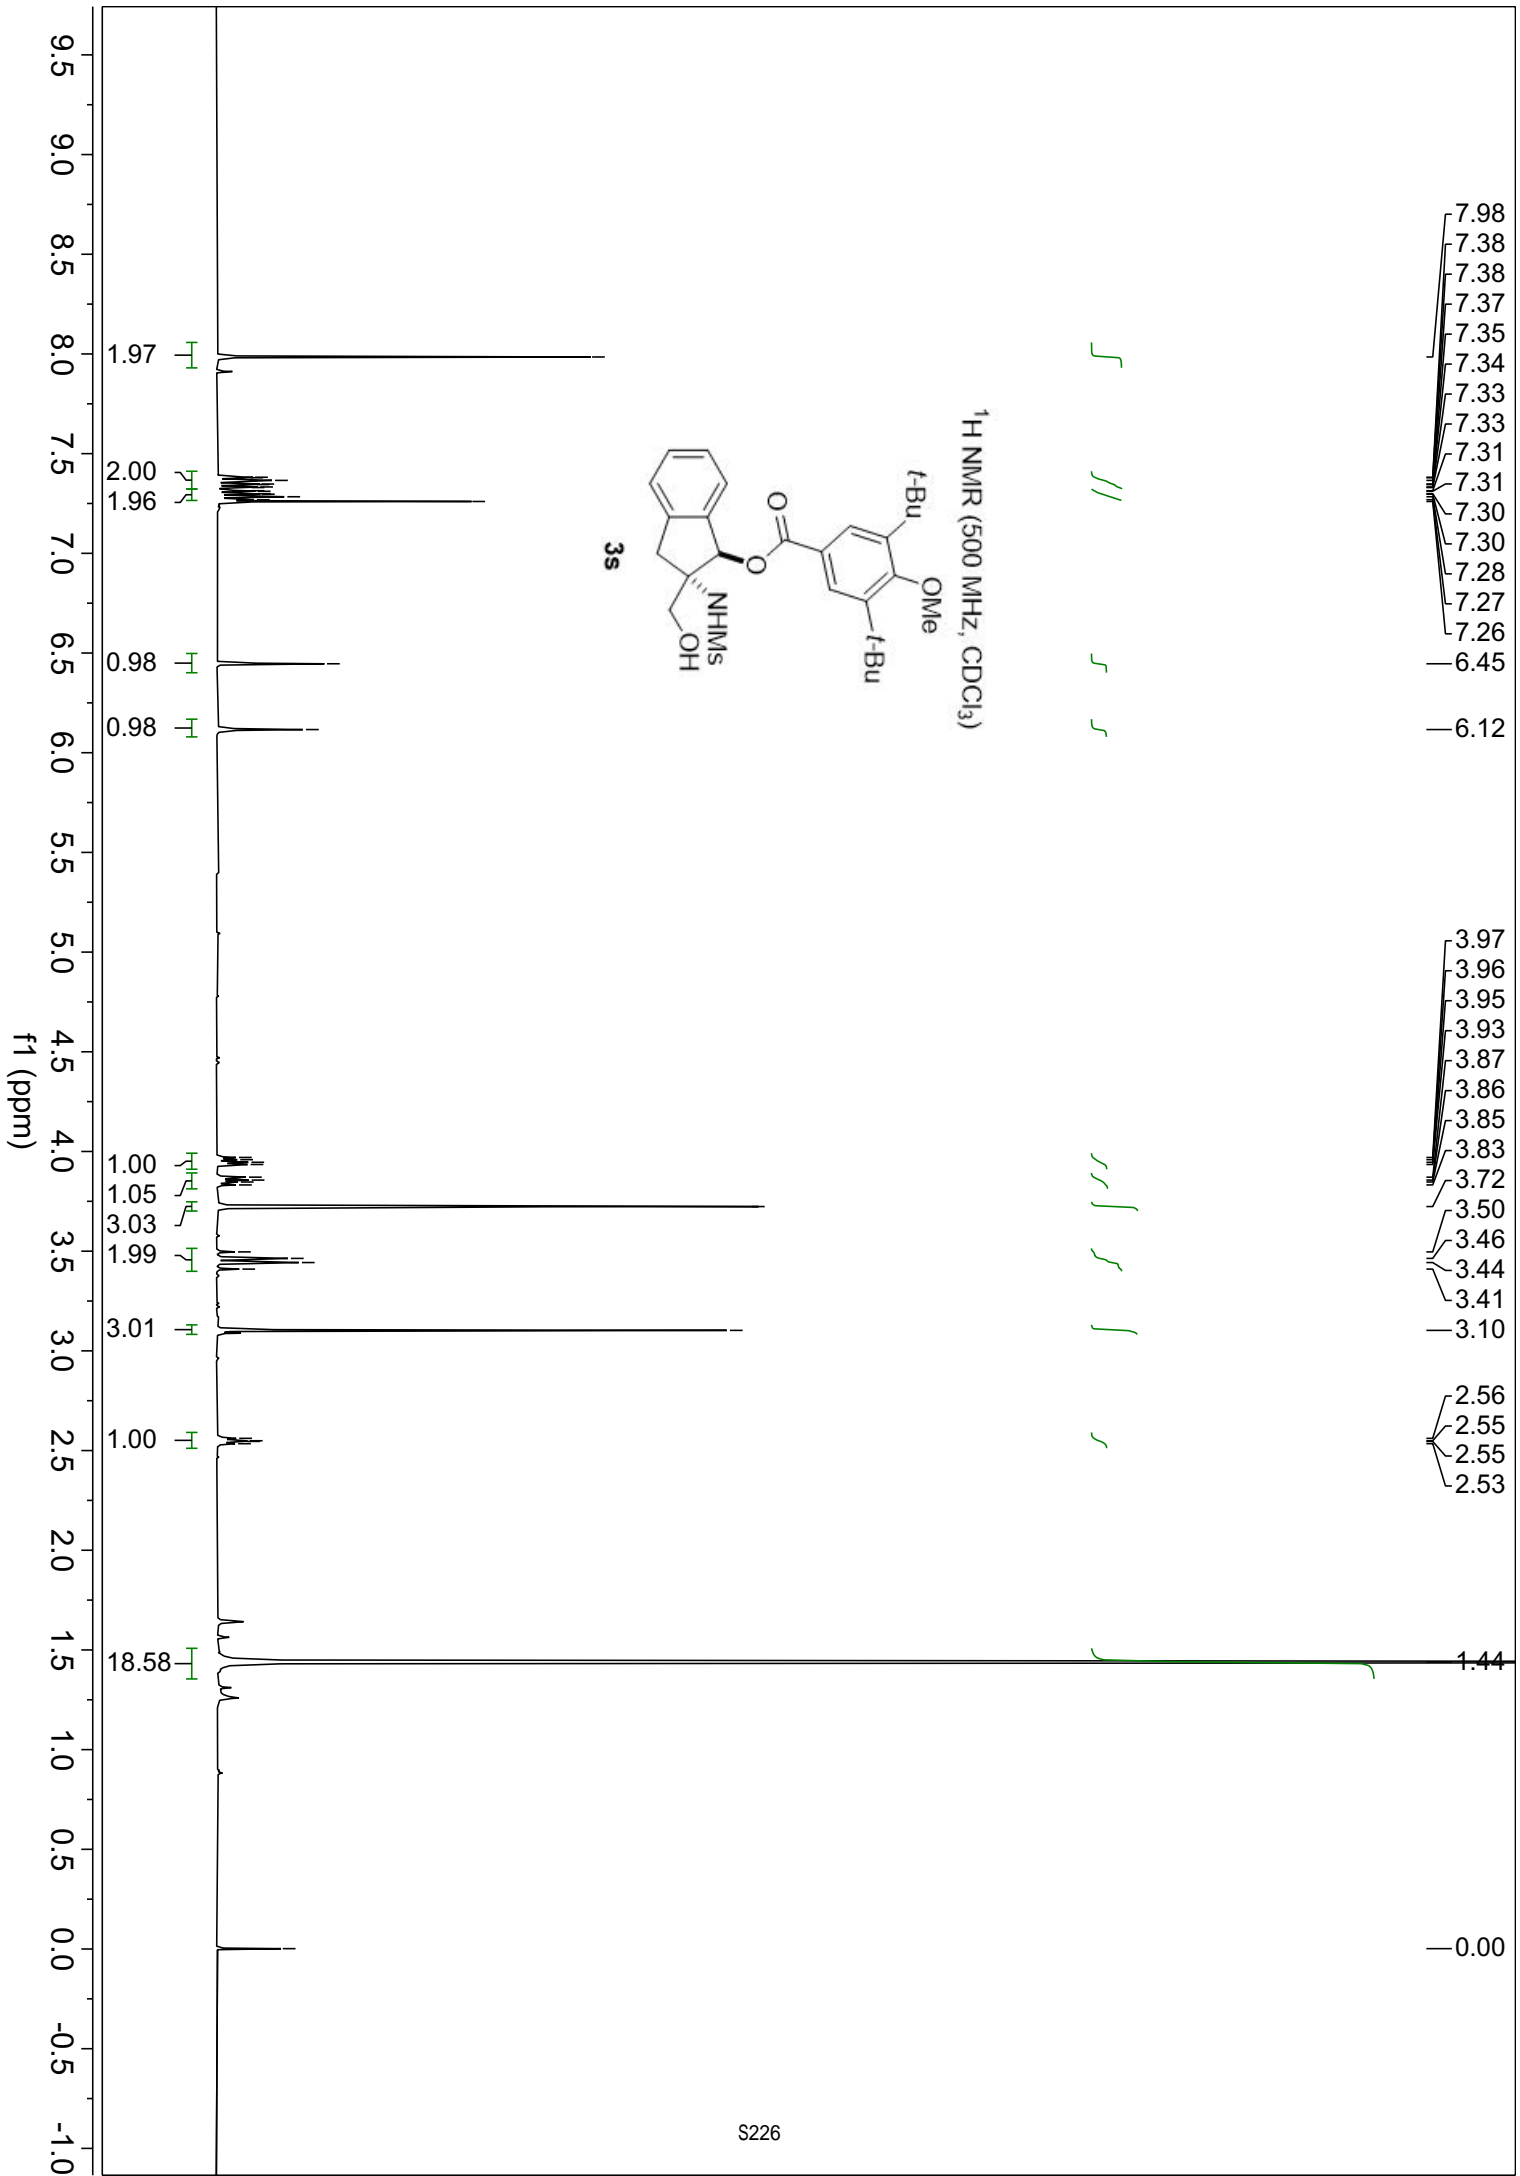

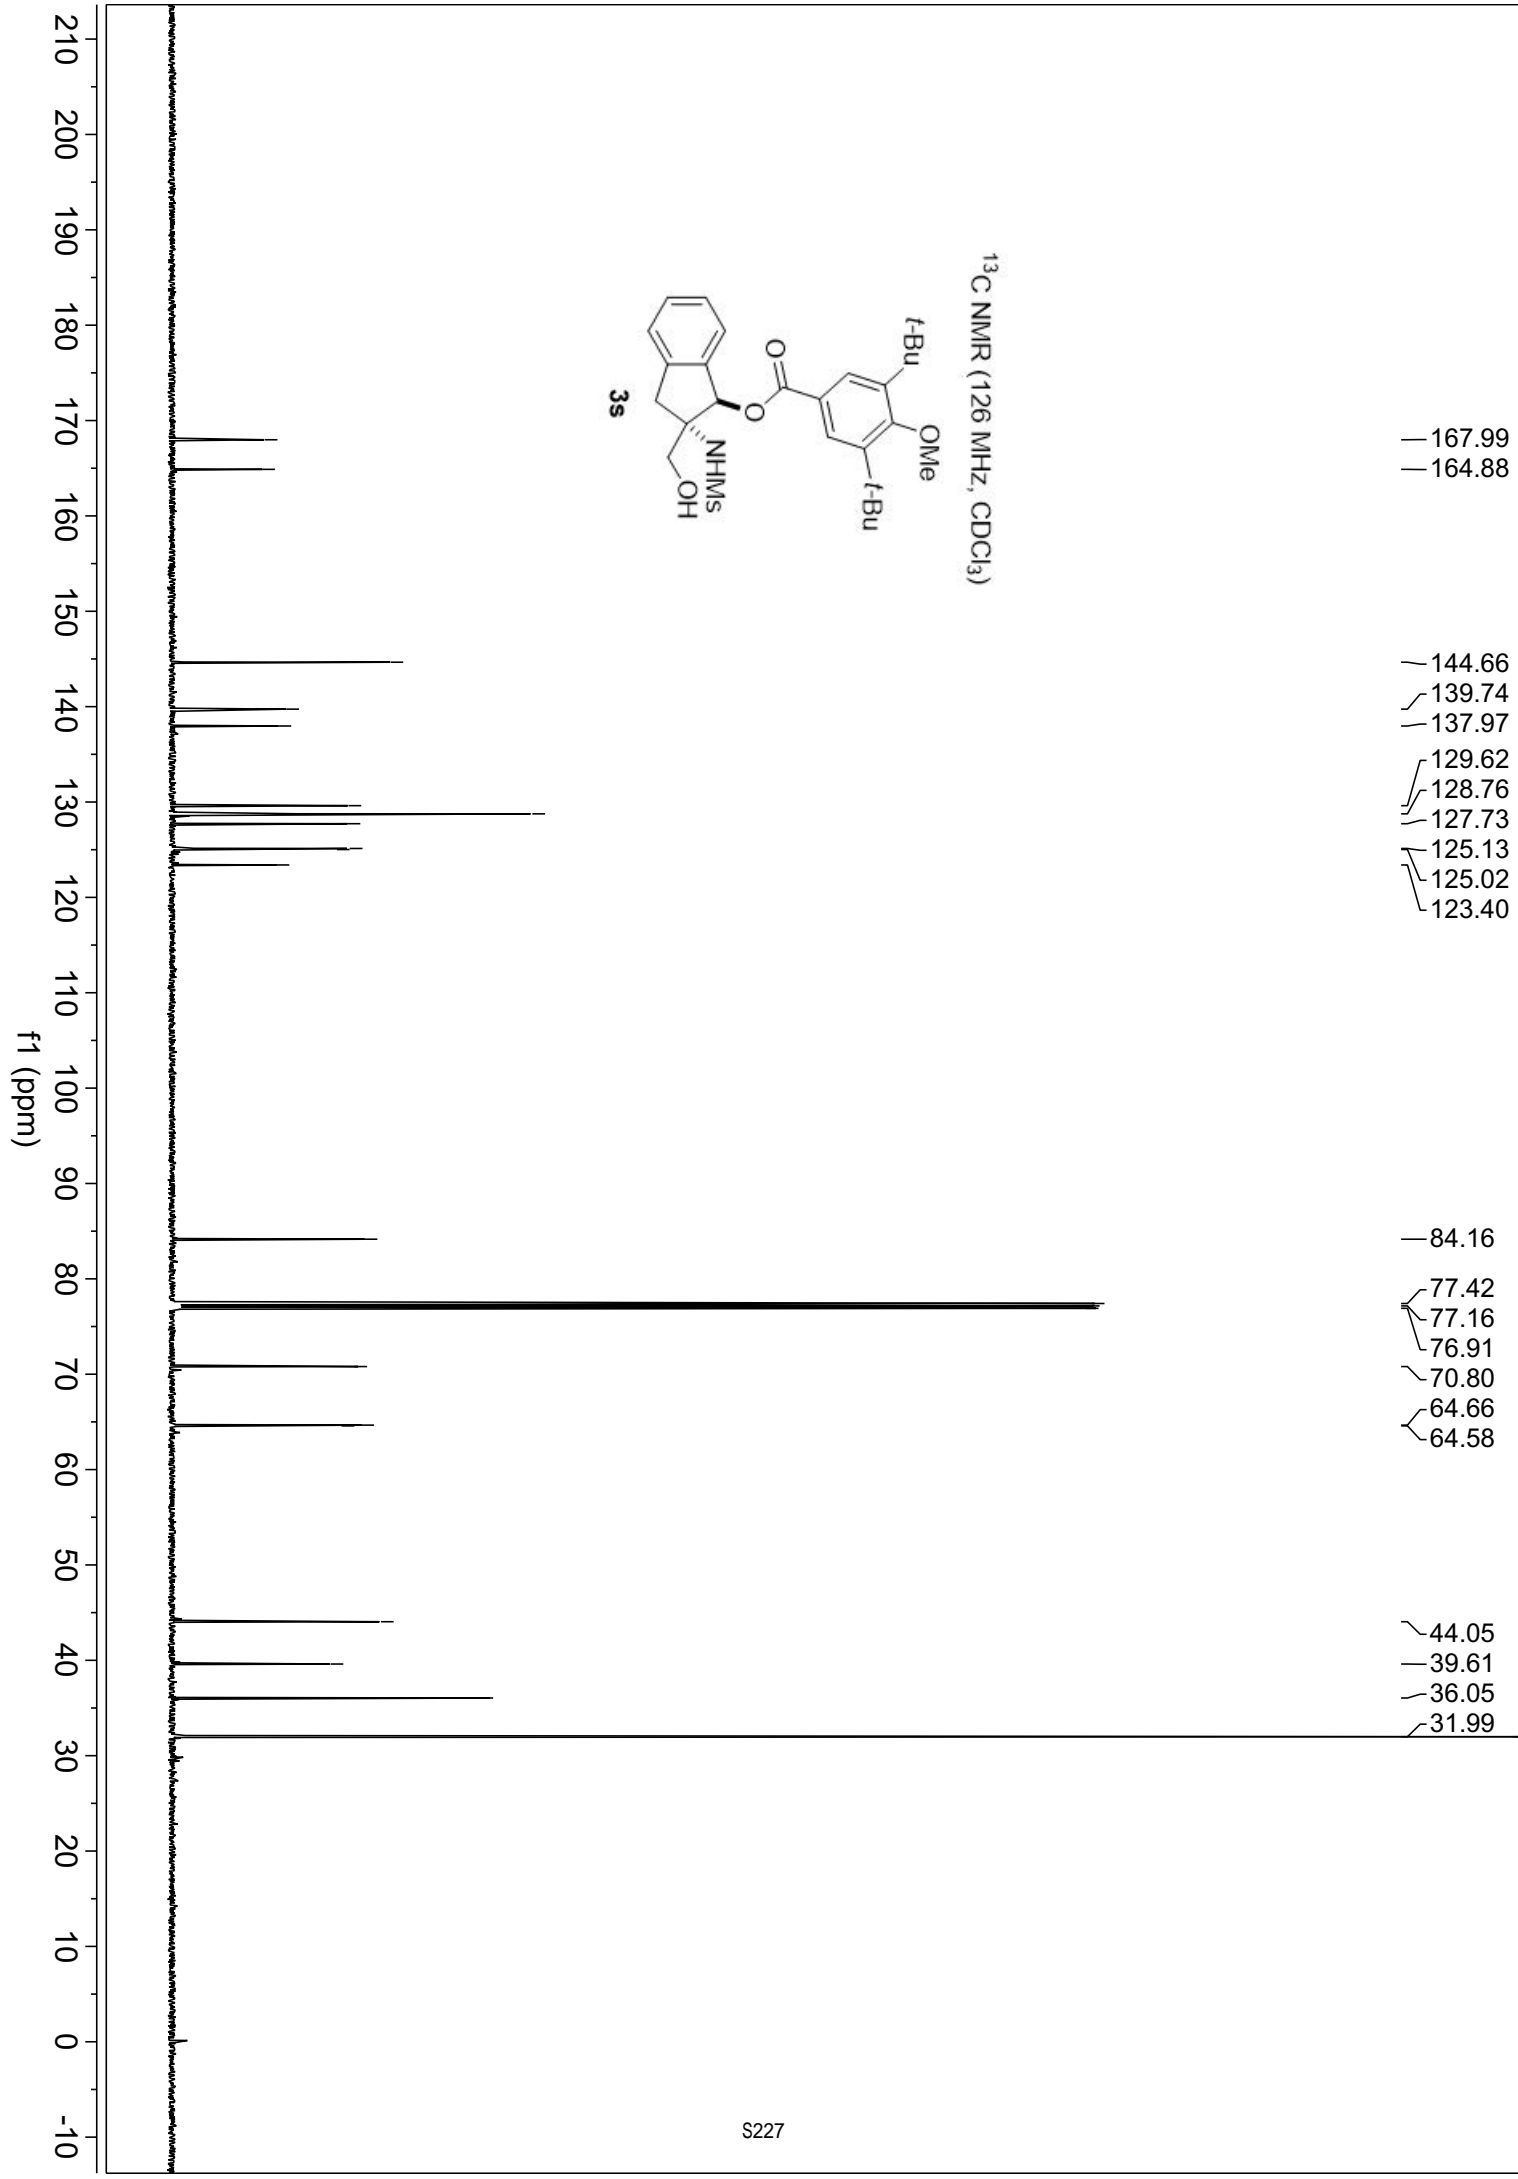

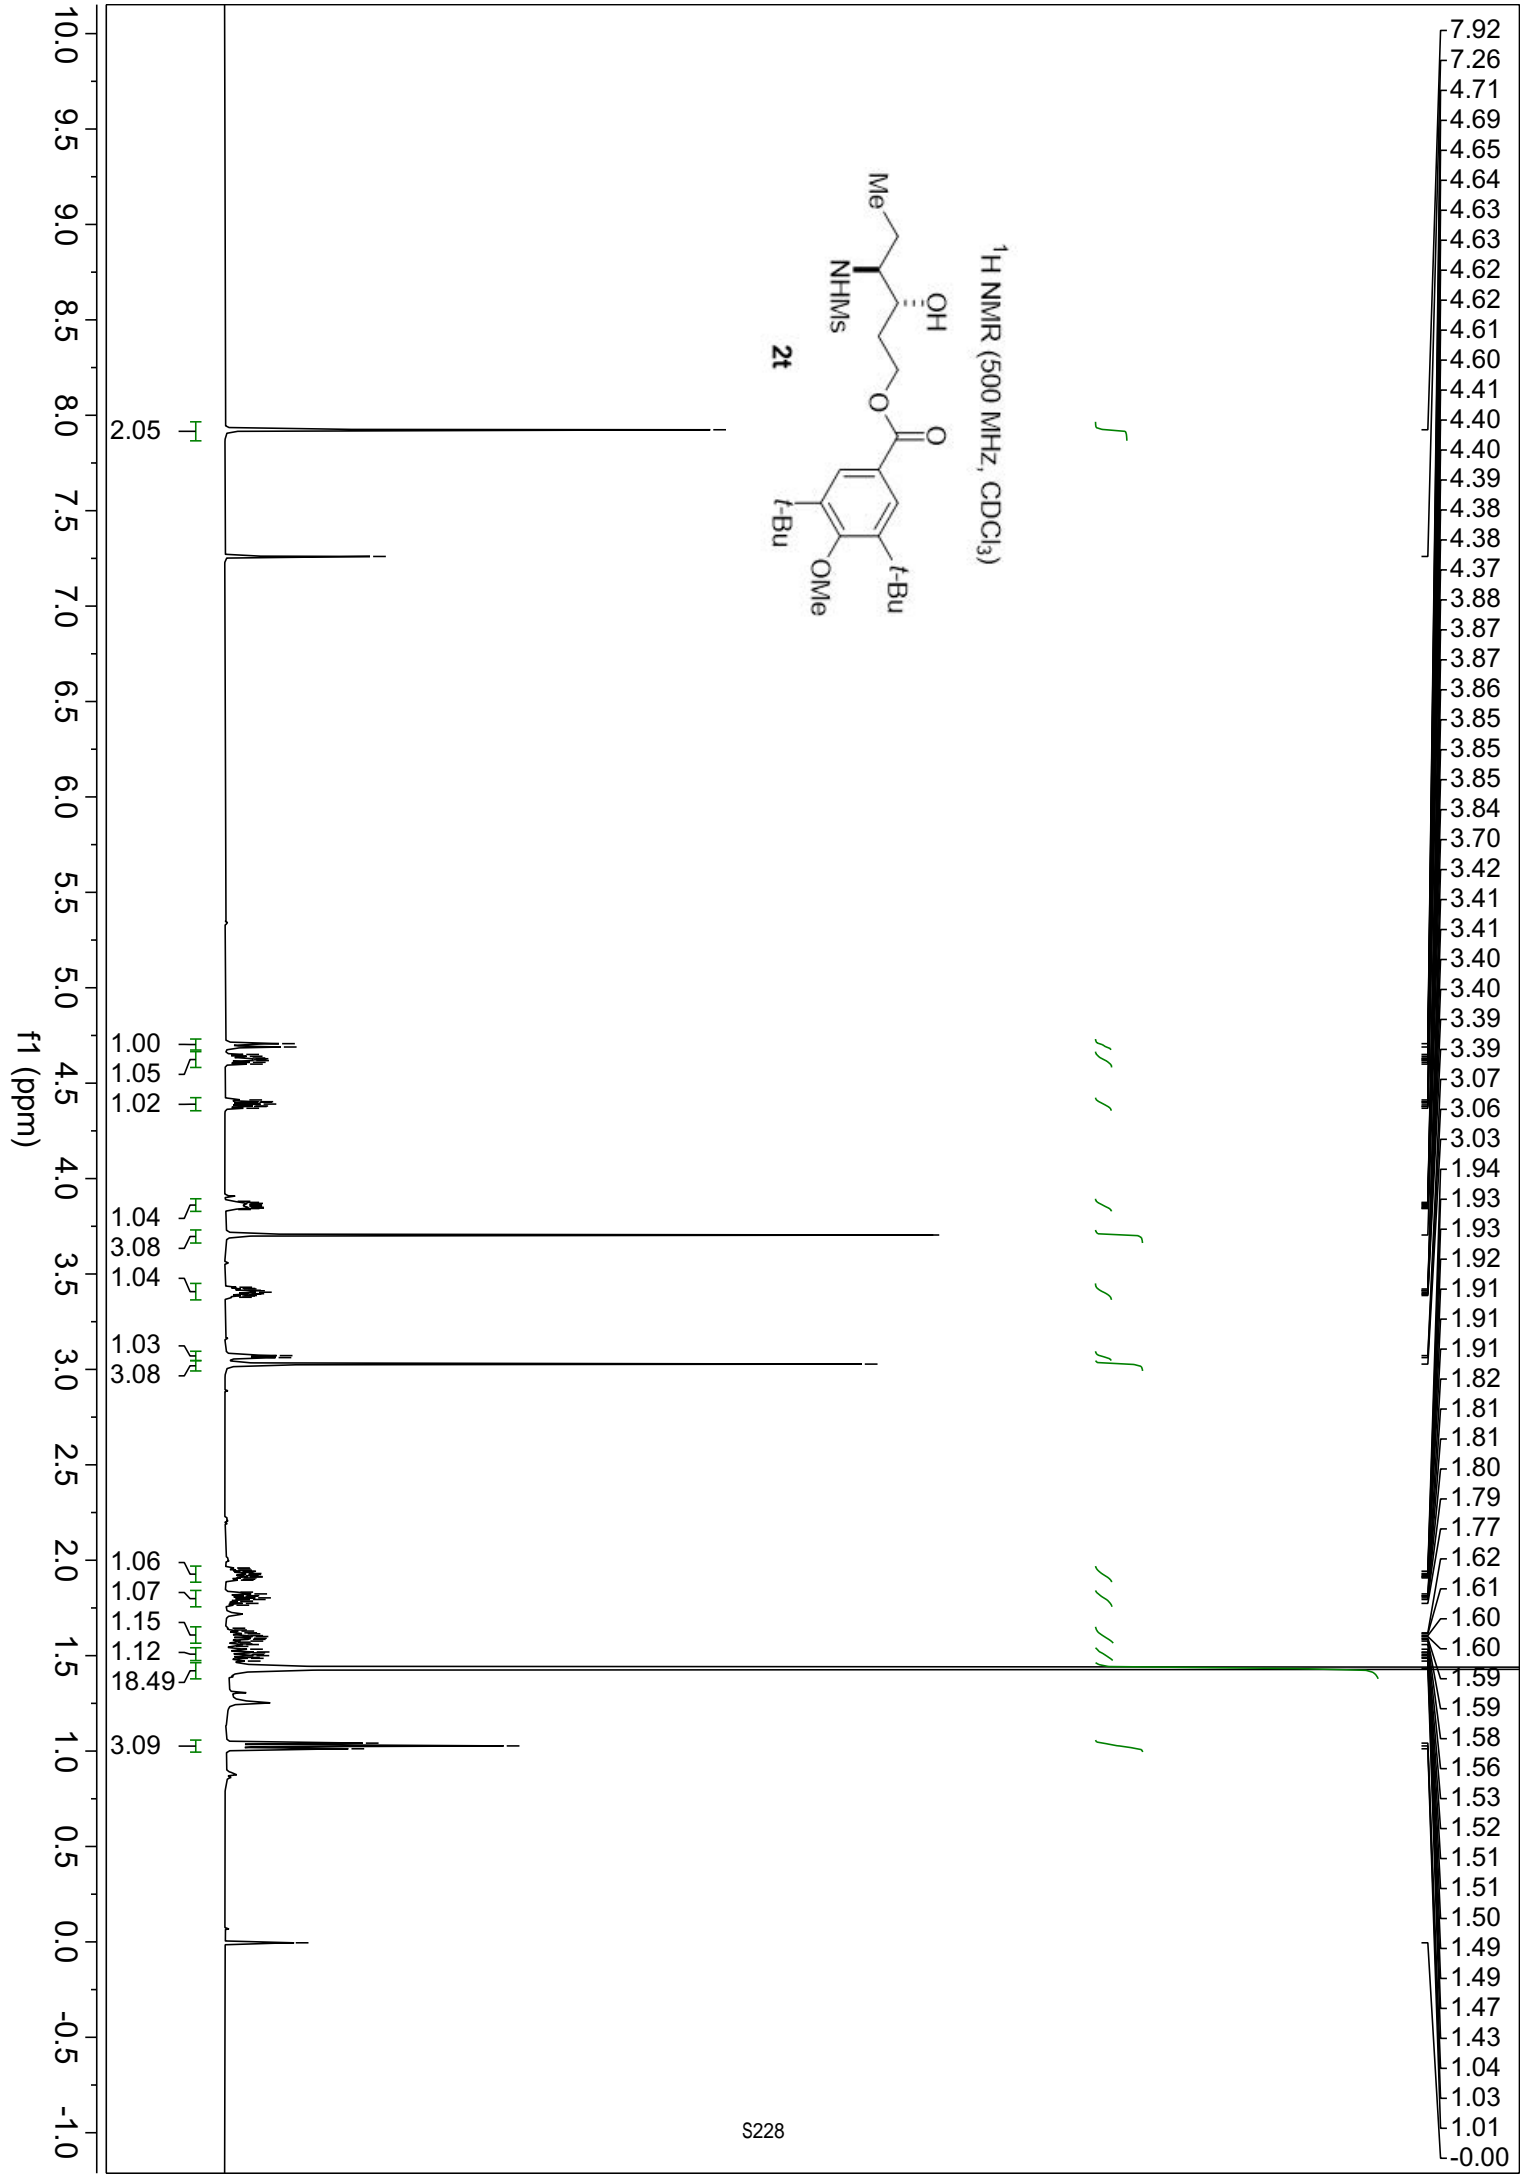

<sup>13</sup>C NMR (126 MHz, CDCl<sub>3</sub>)

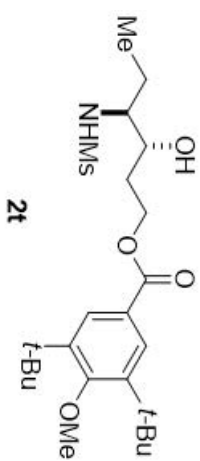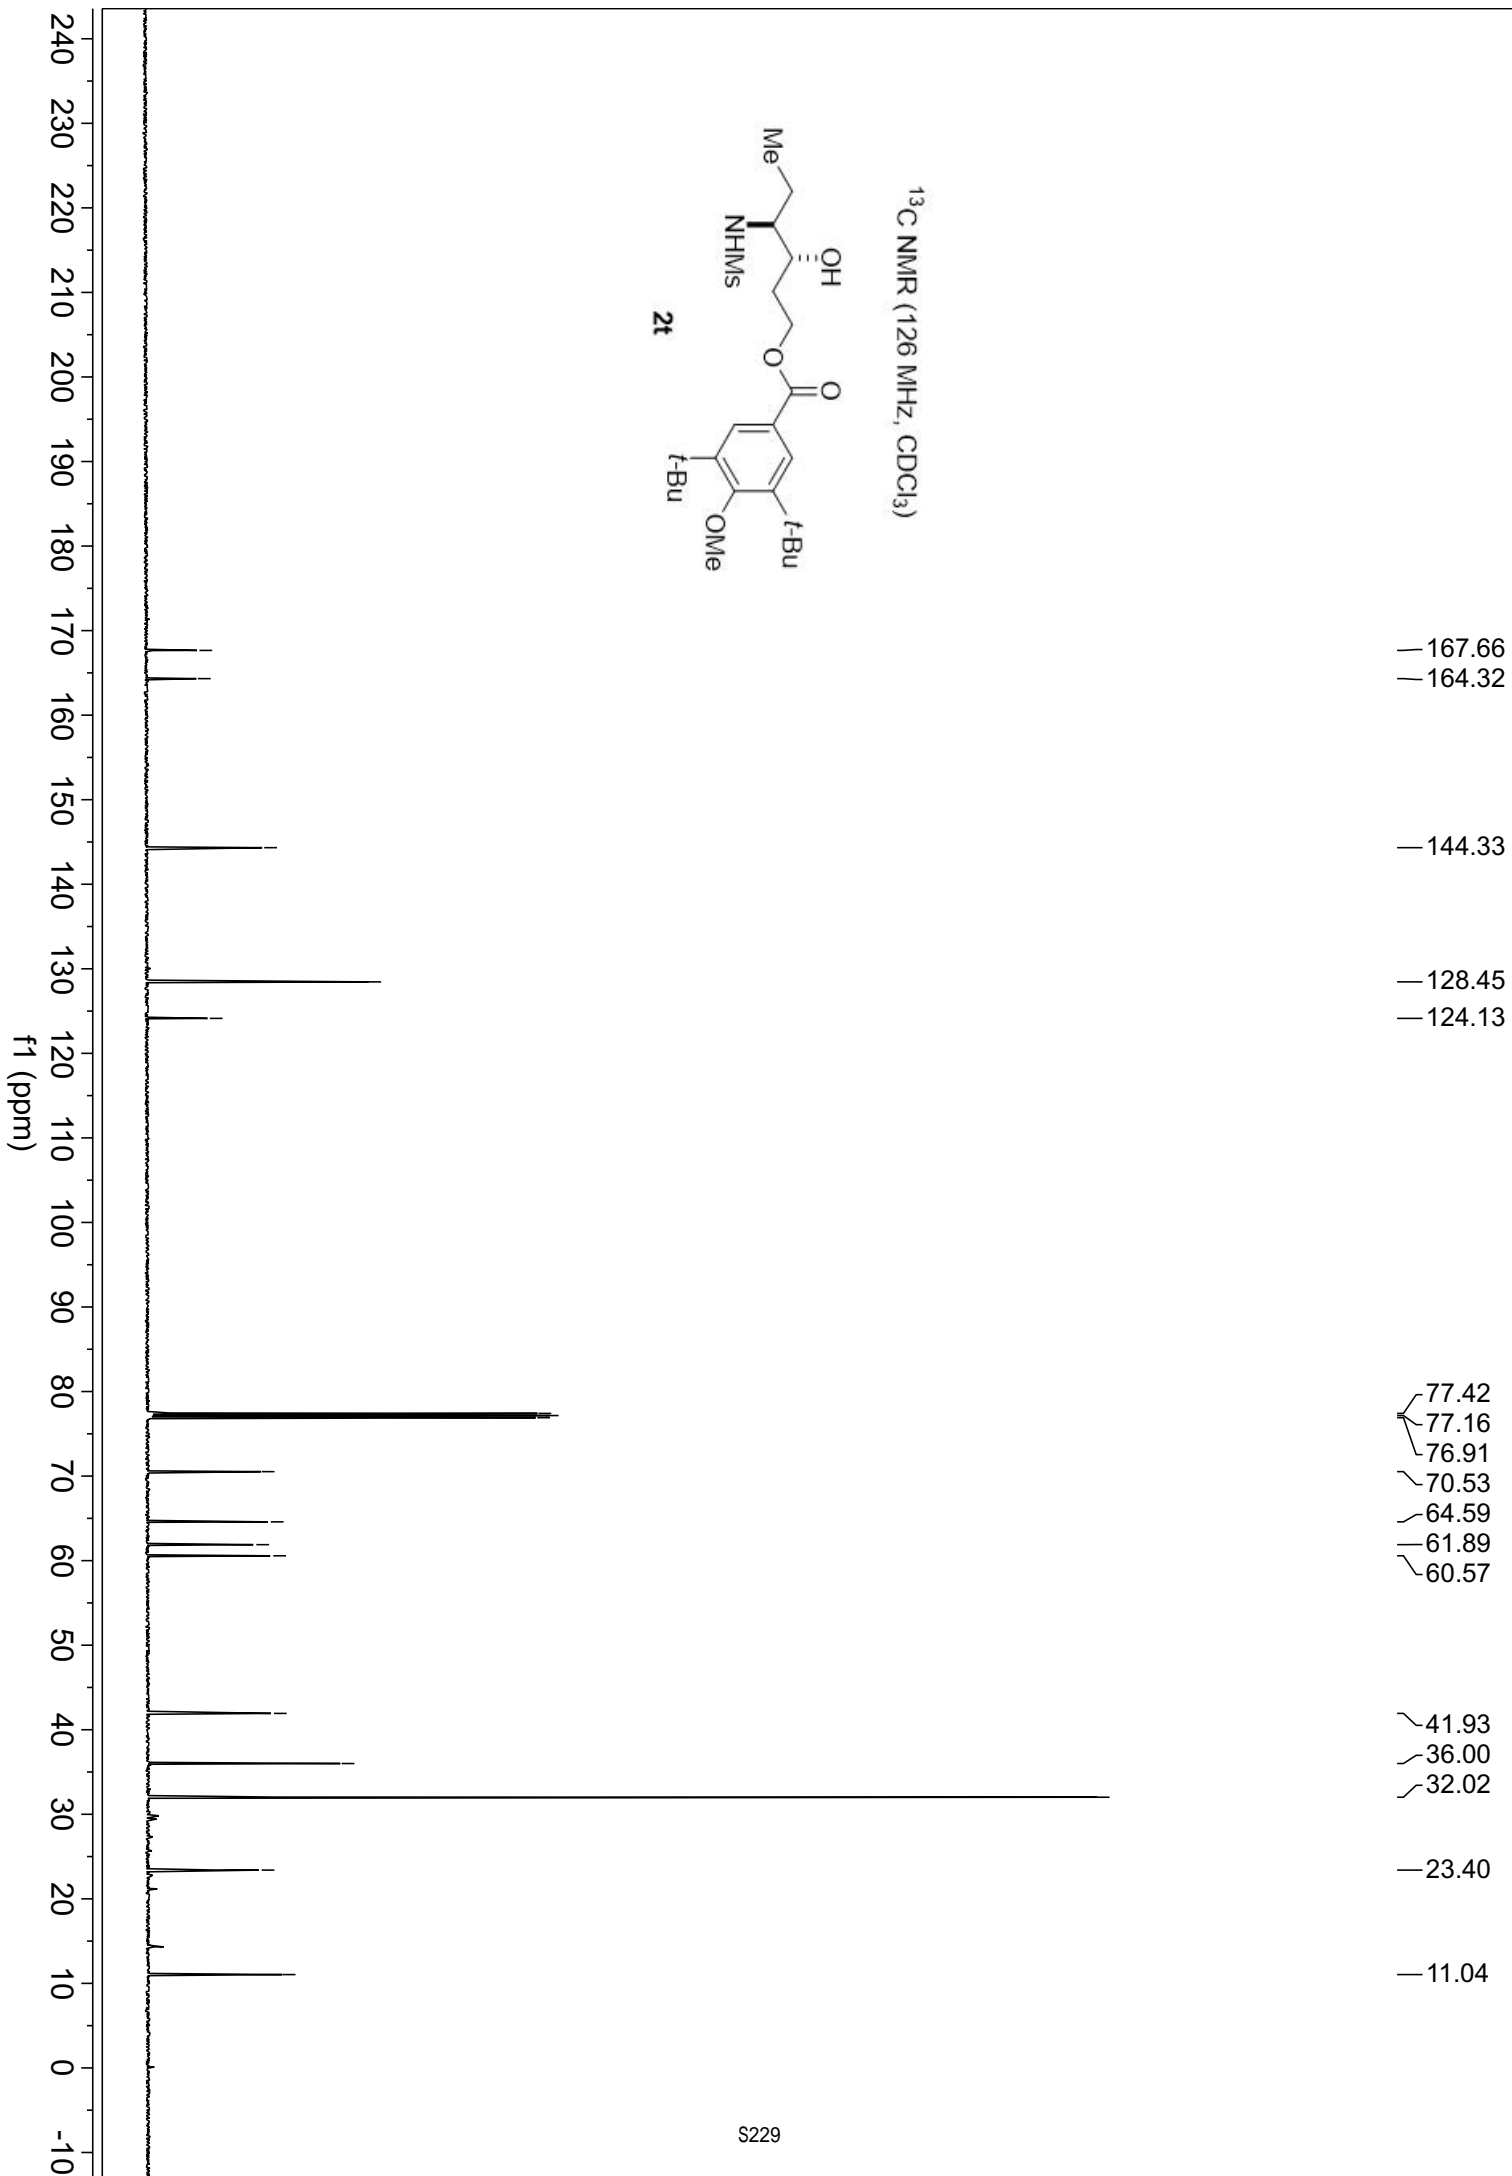

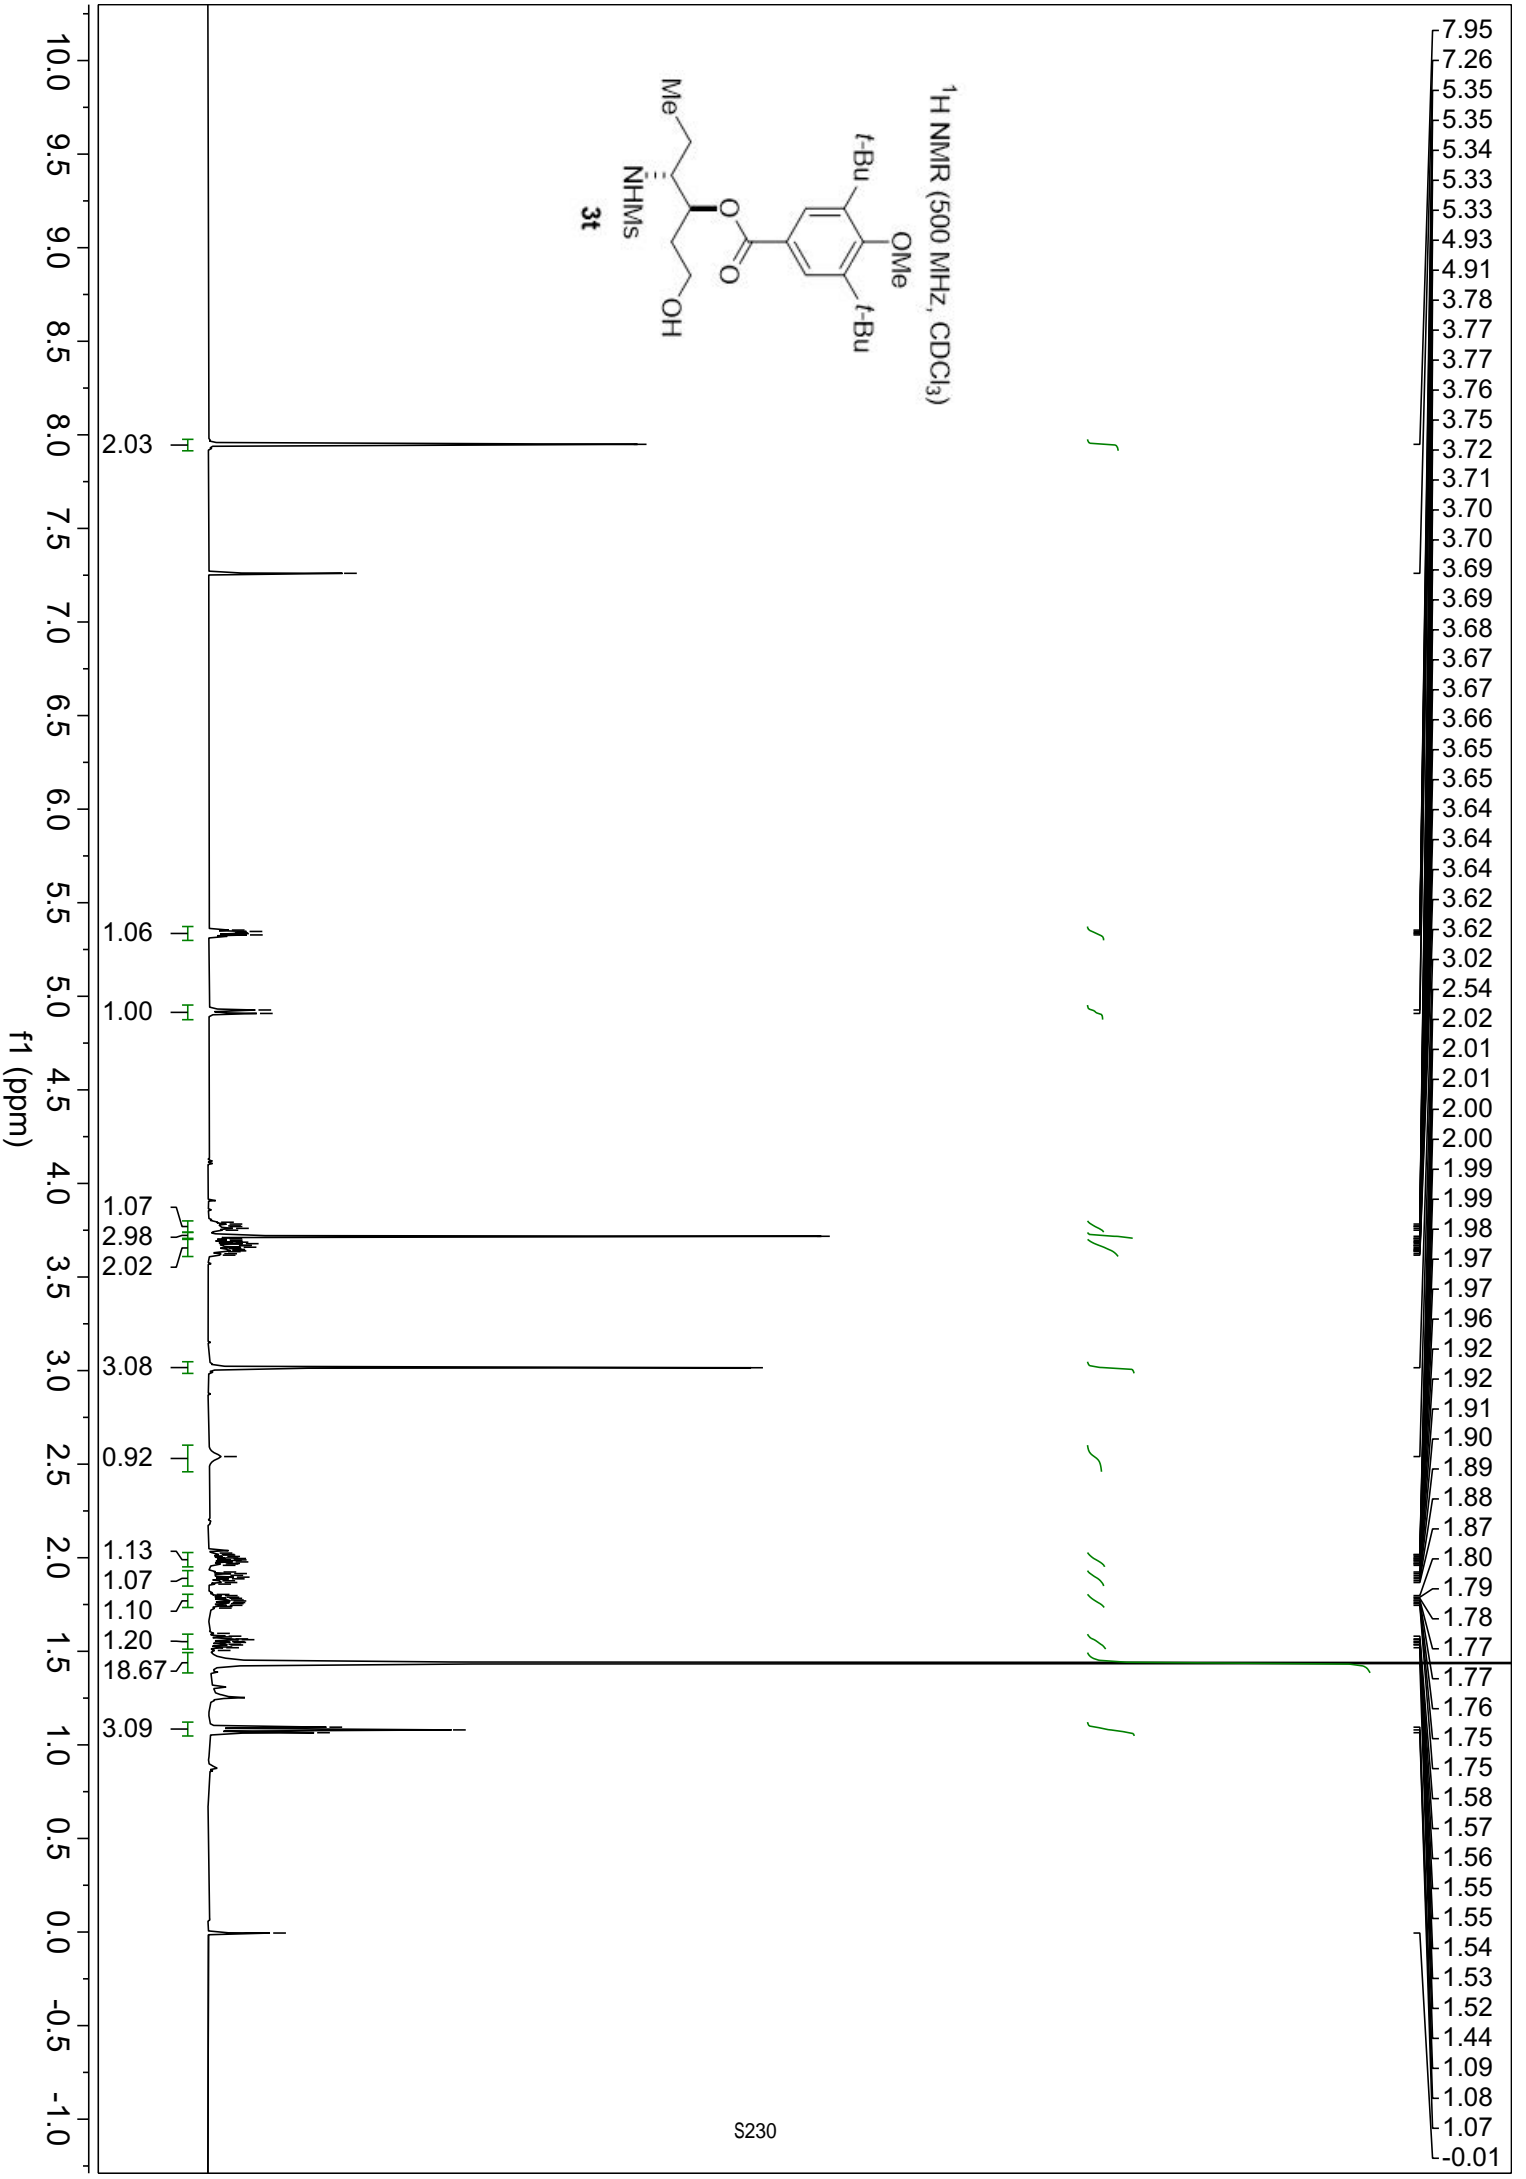

<sup>13</sup>C NMR (126 MHz, CDCl<sub>3</sub>)

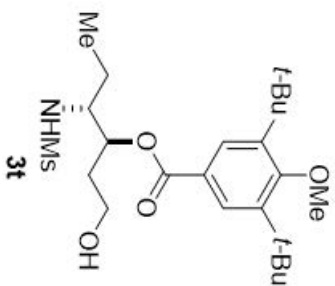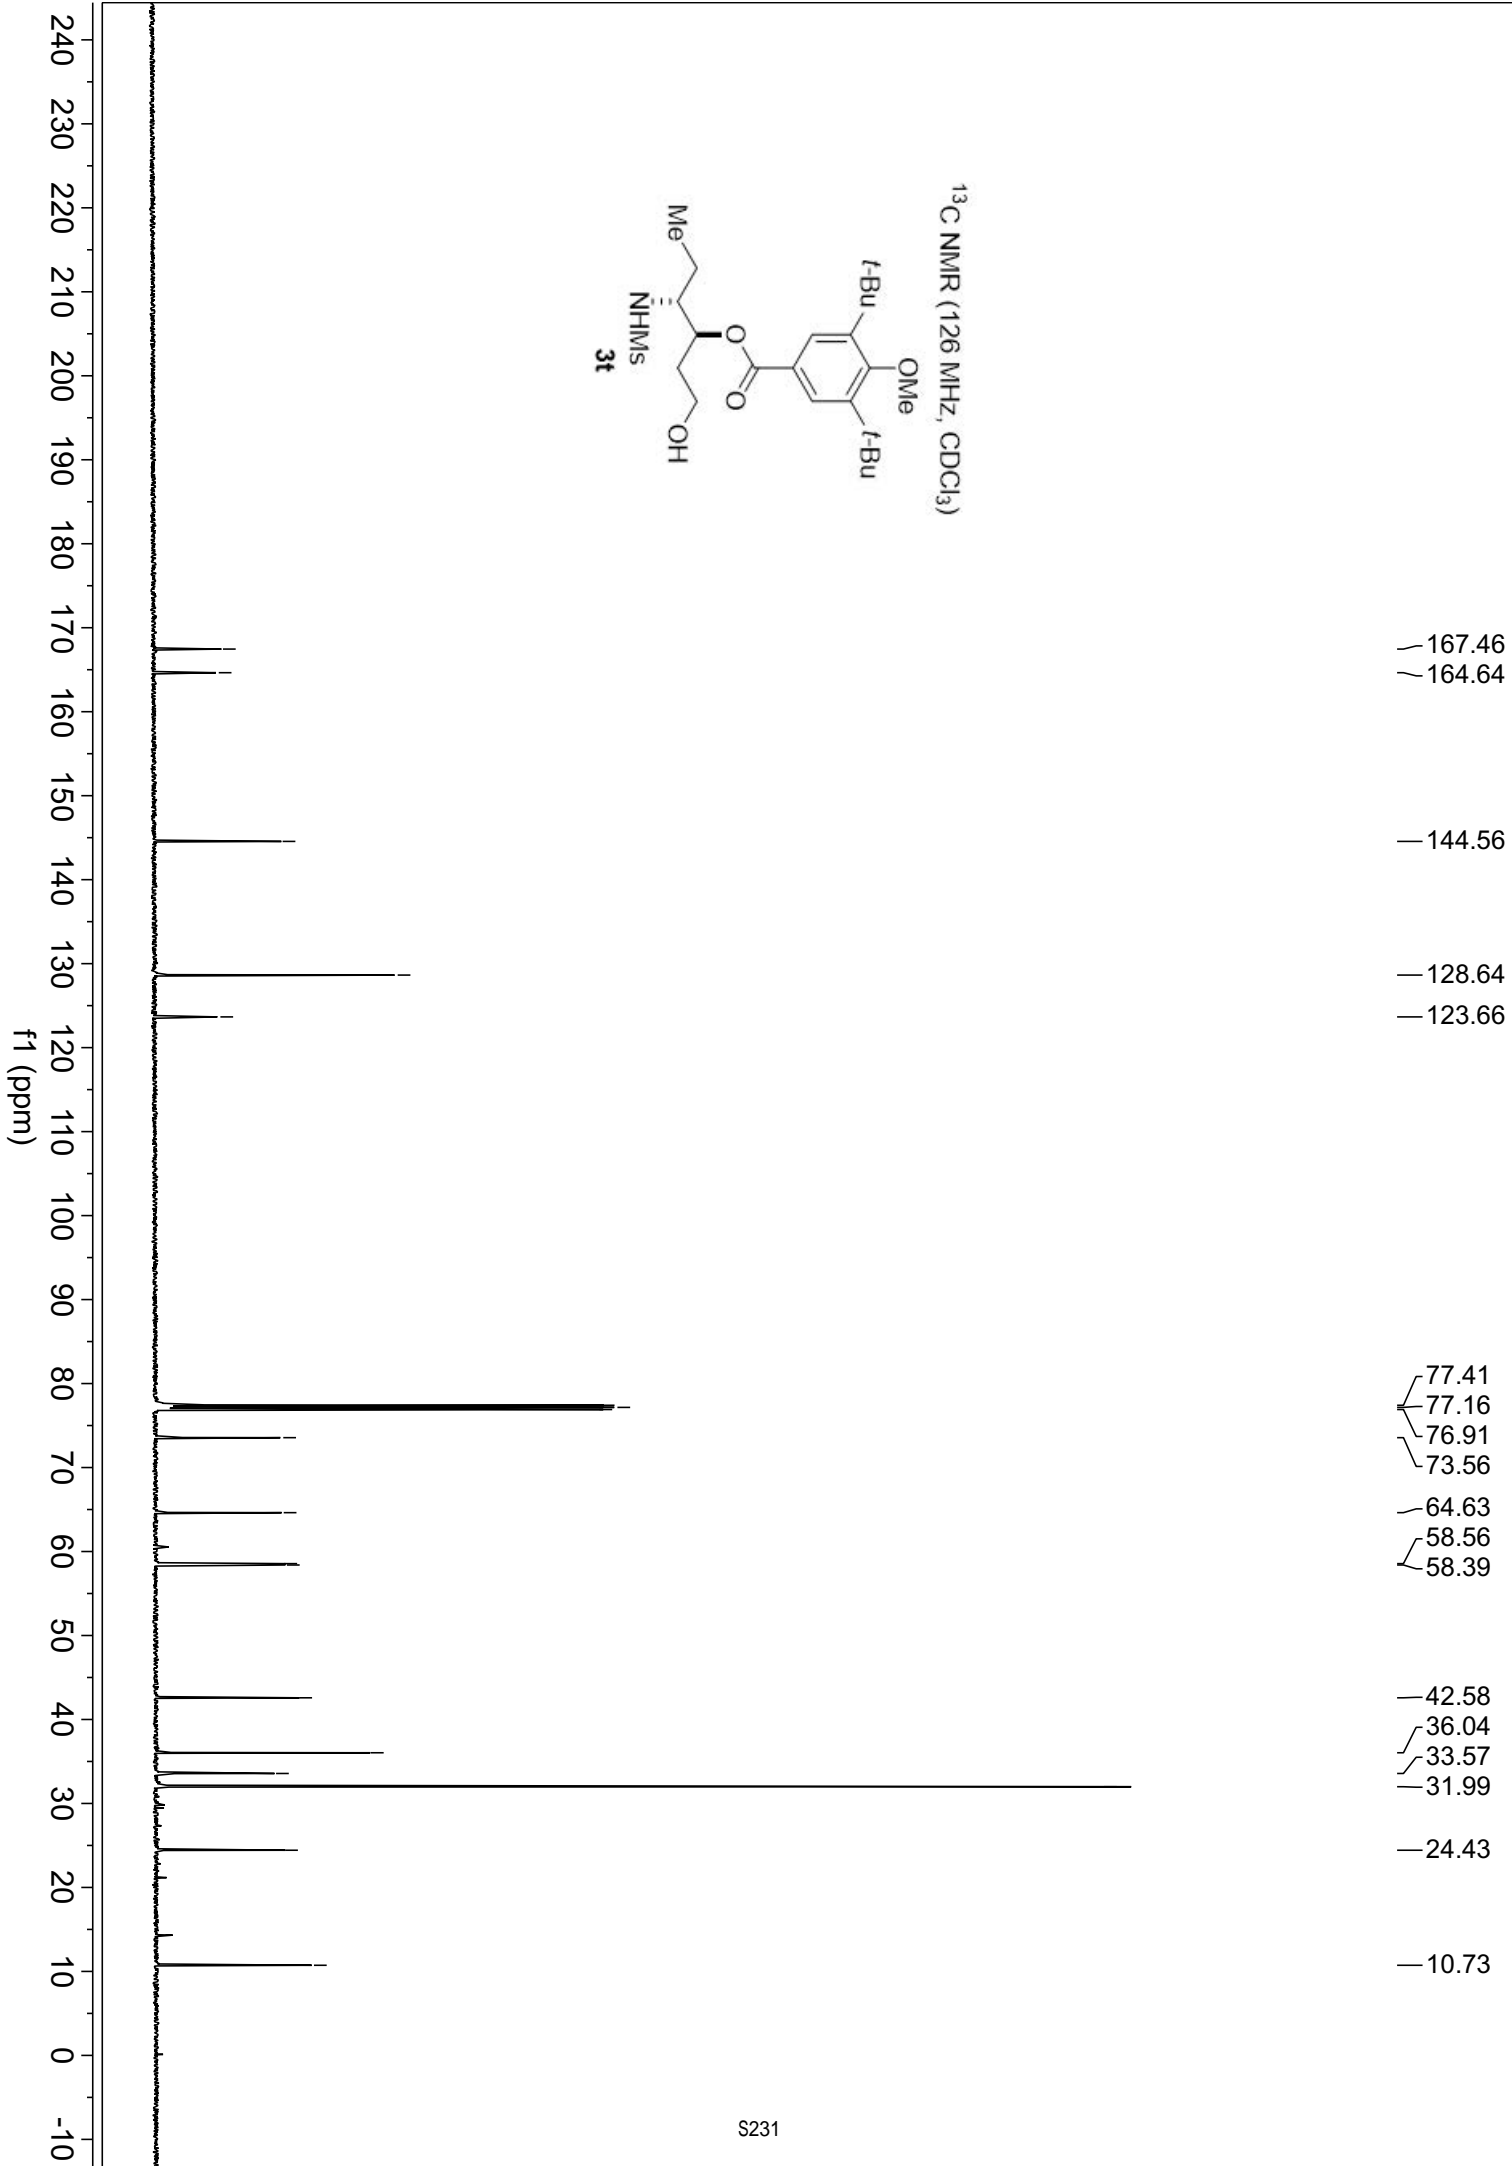

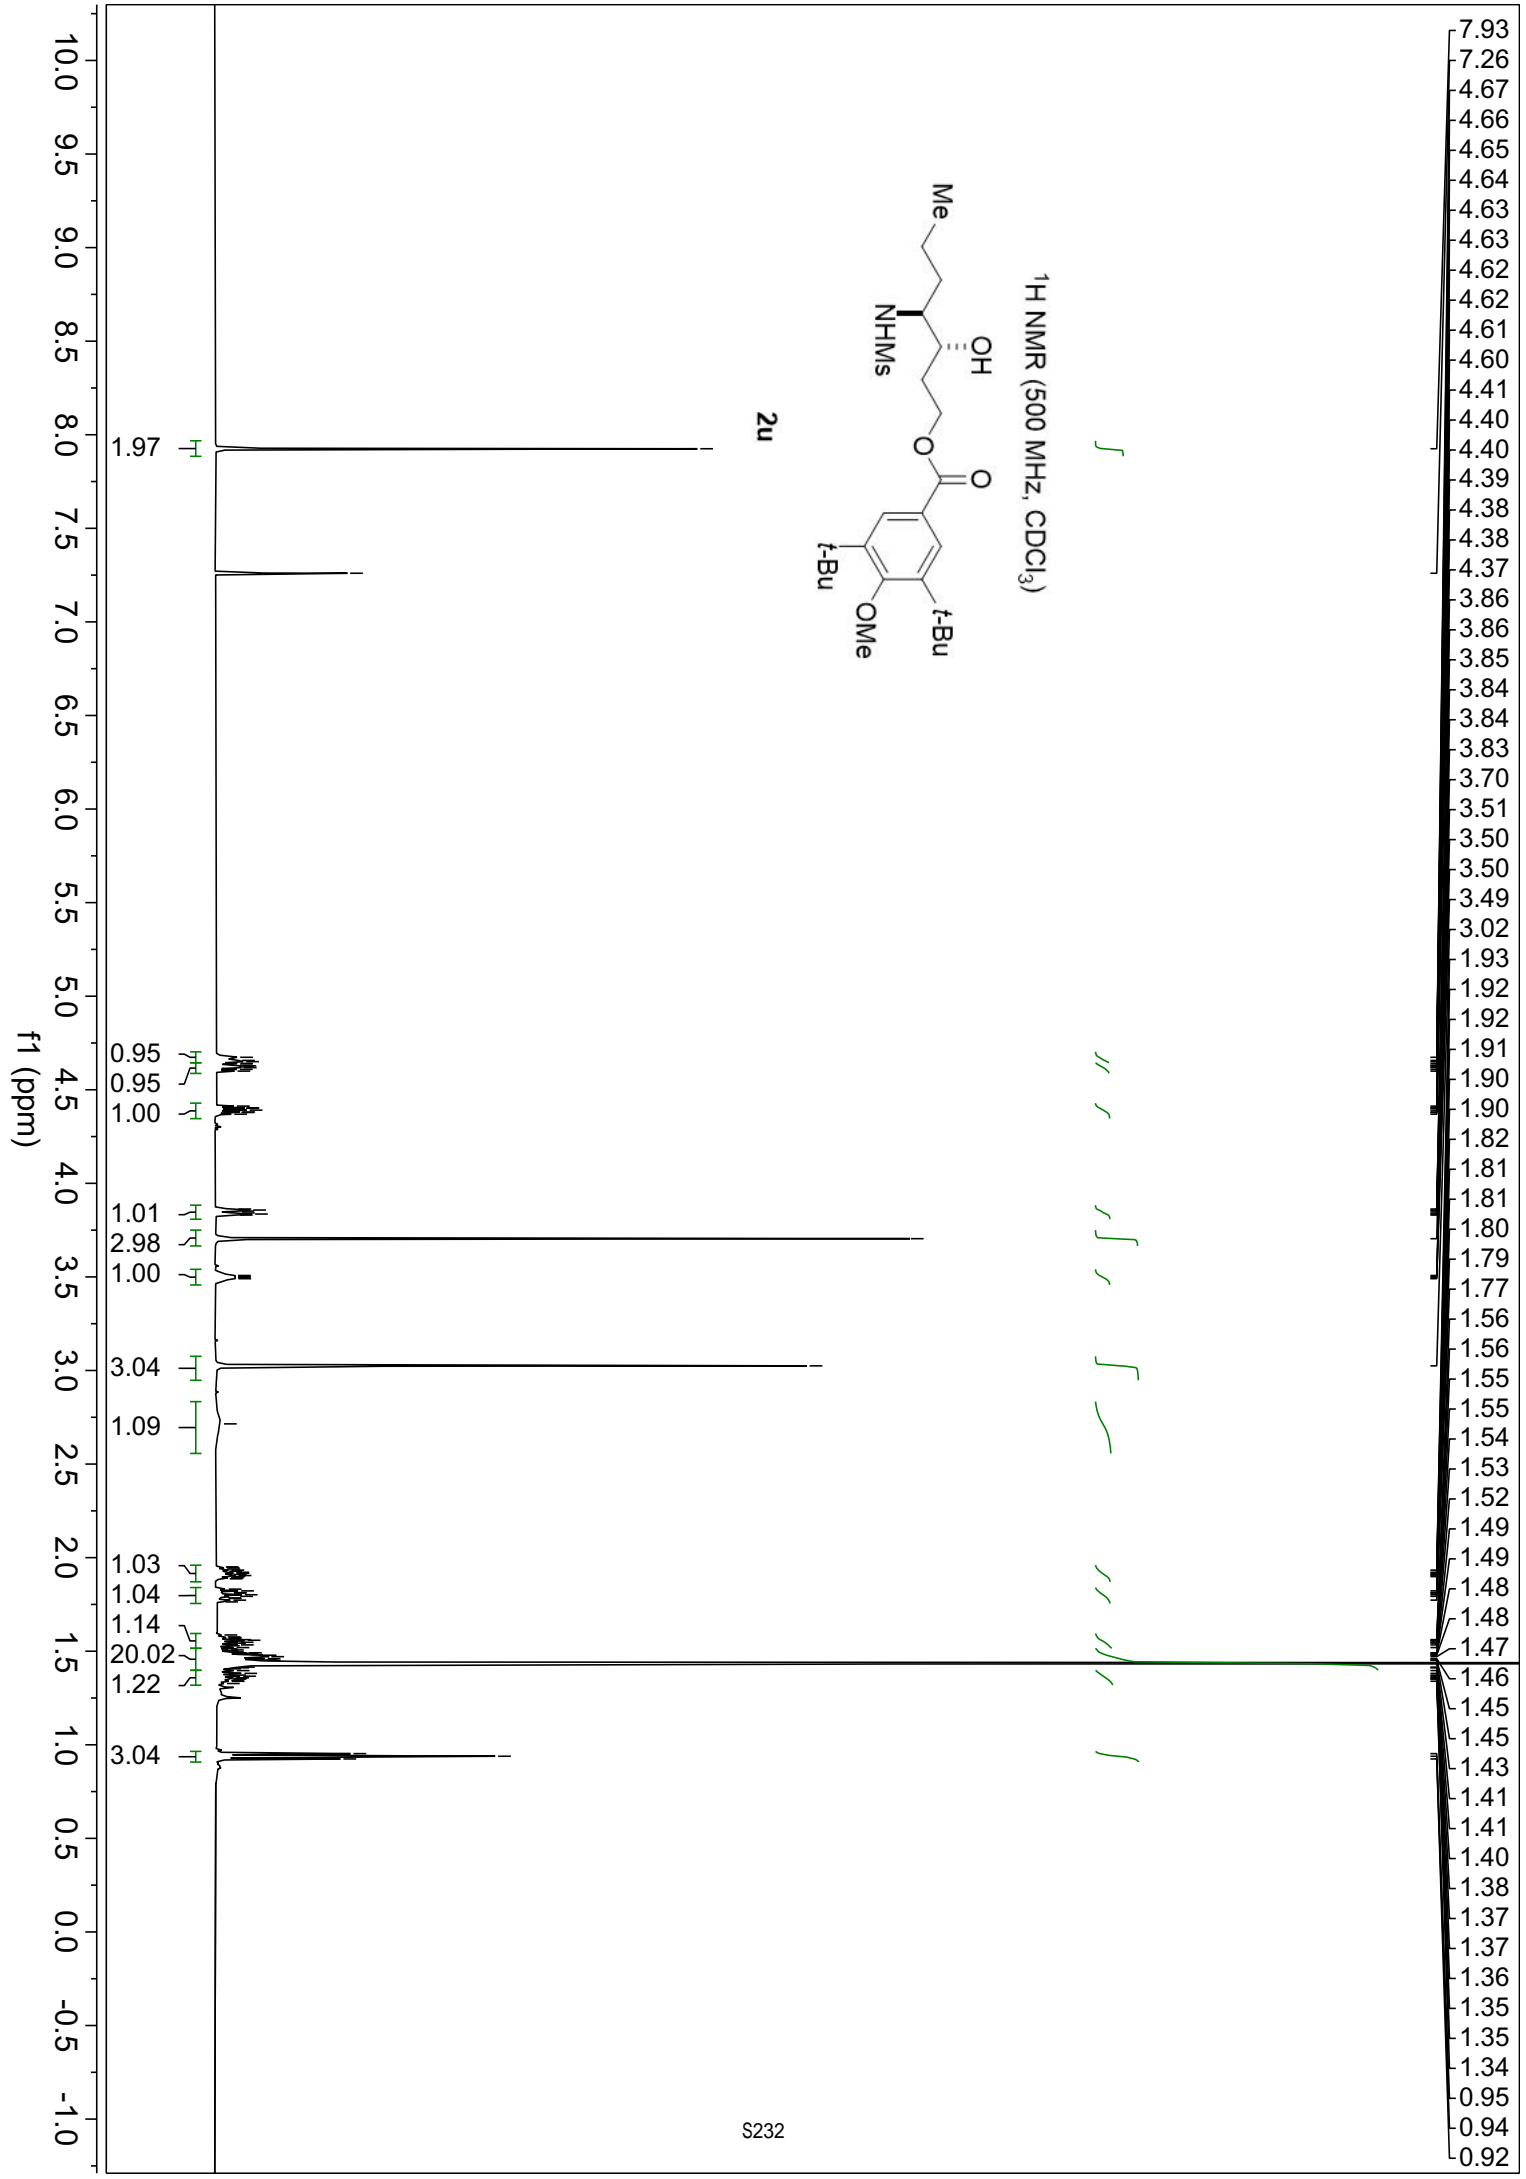



<sup>13</sup>C NMR (126 MHz, CDCl<sub>3</sub>)

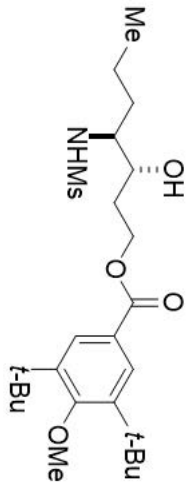

2u

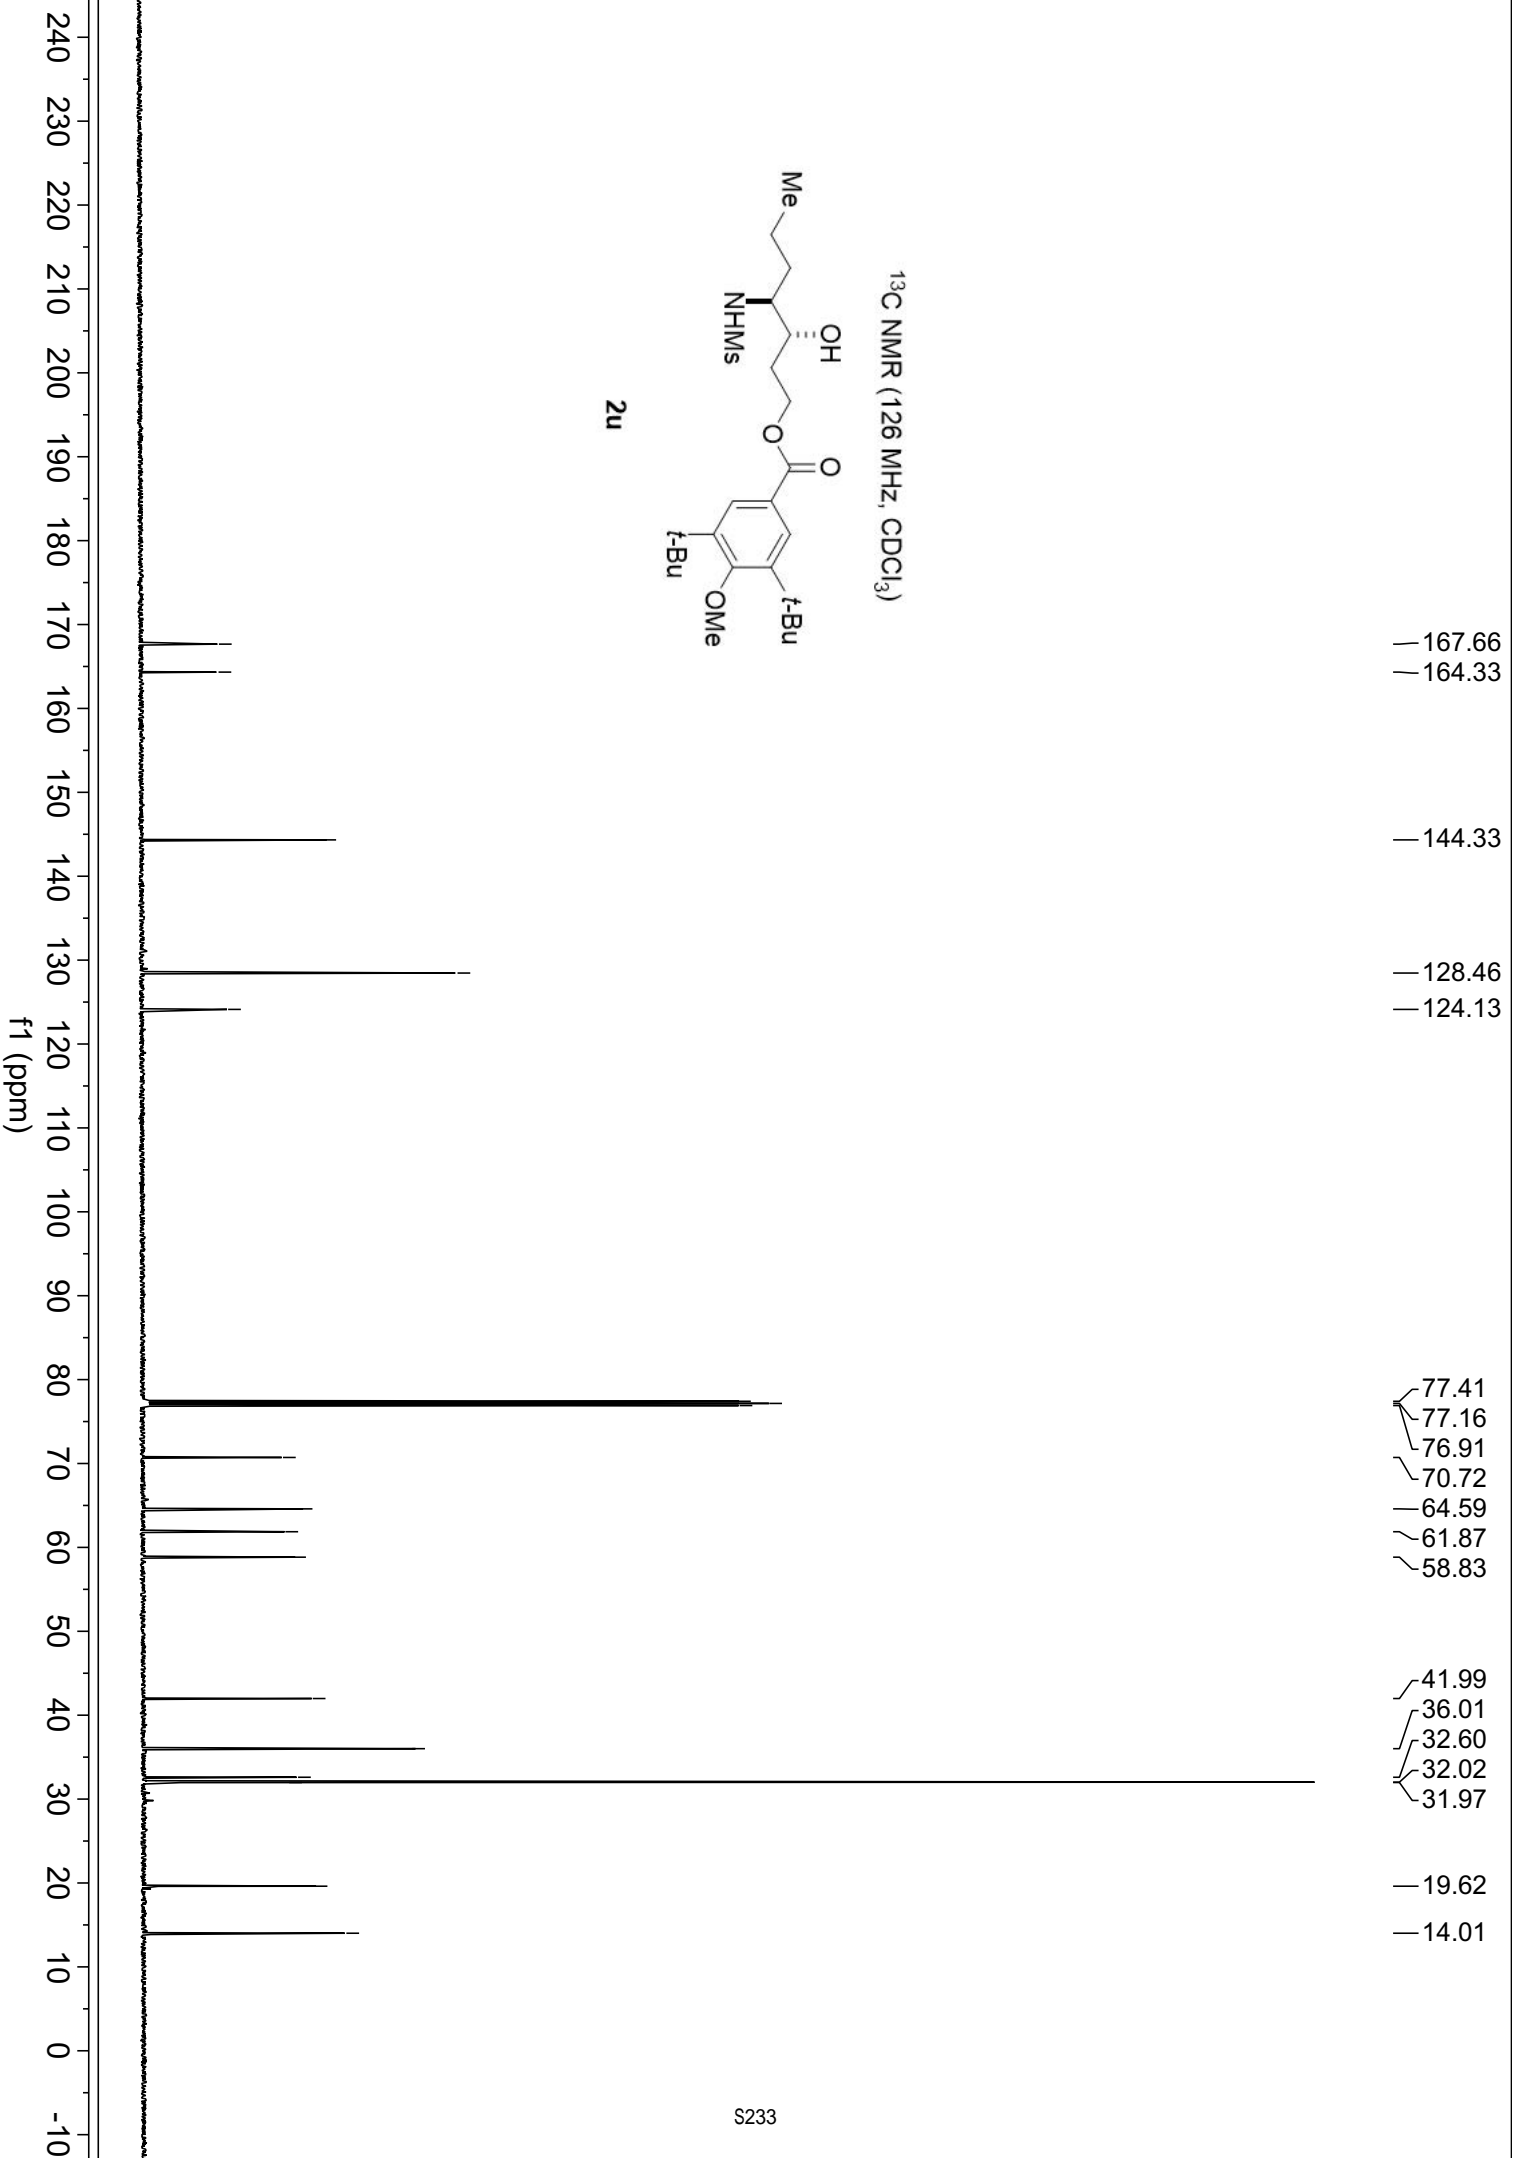

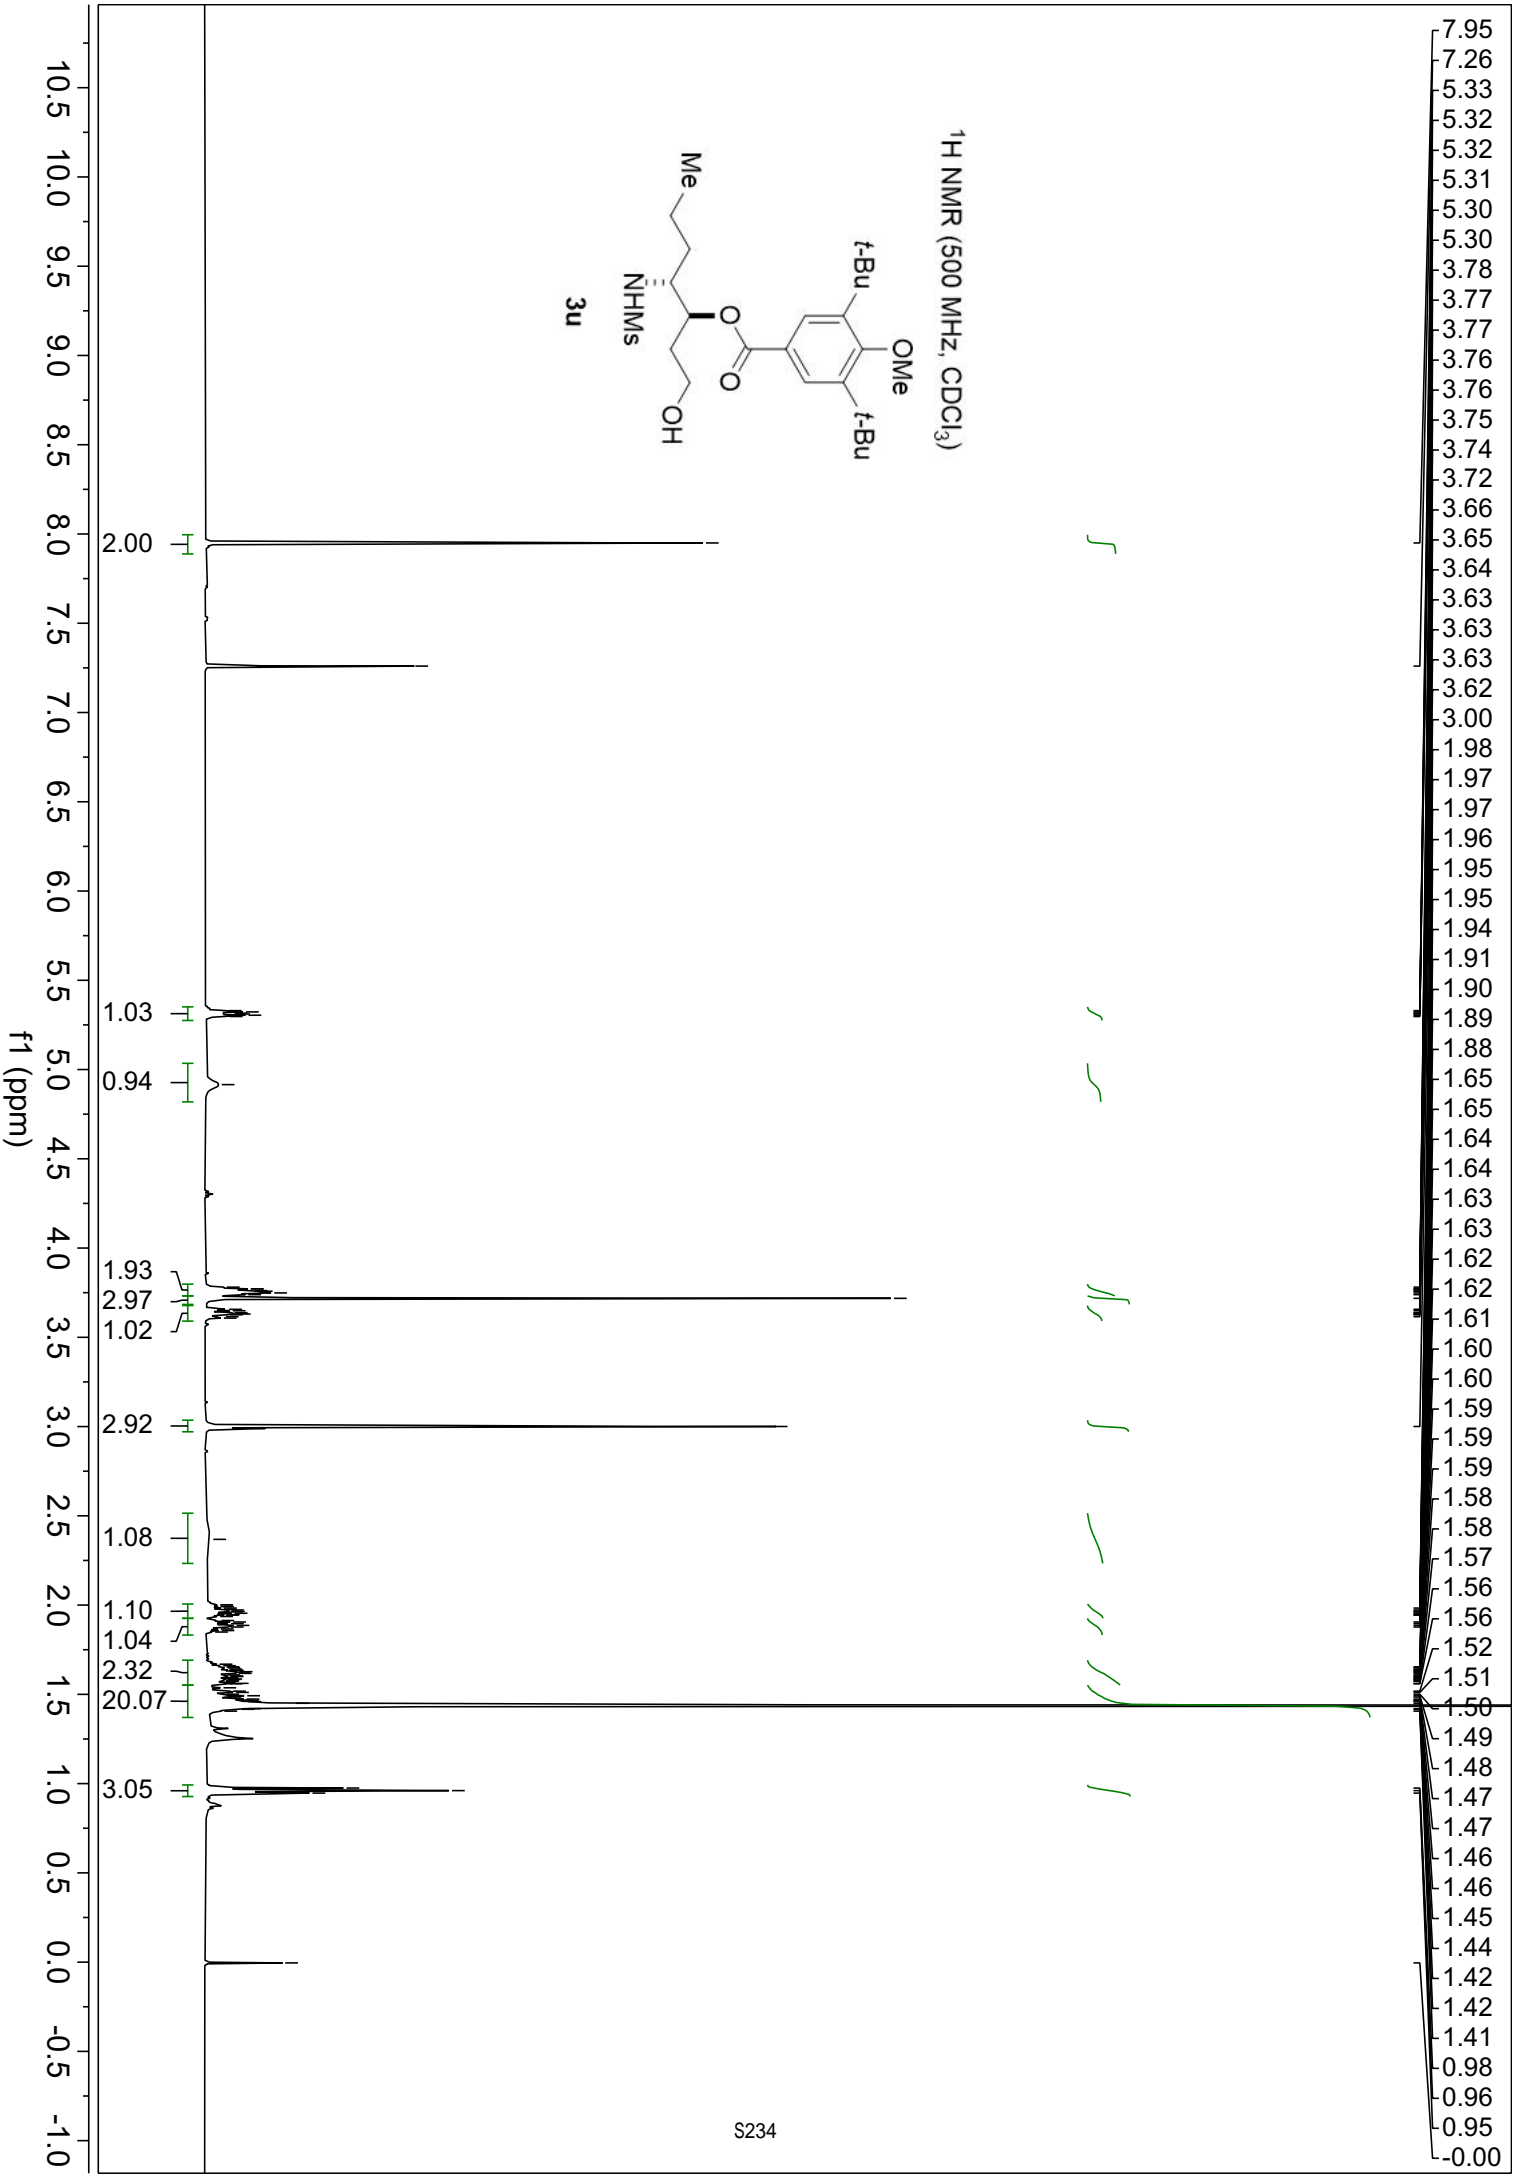

<sup>13</sup>C NMR (126 MHz, CDCl<sub>3</sub>)

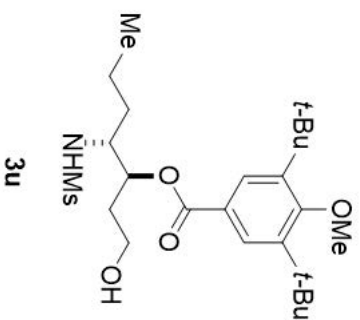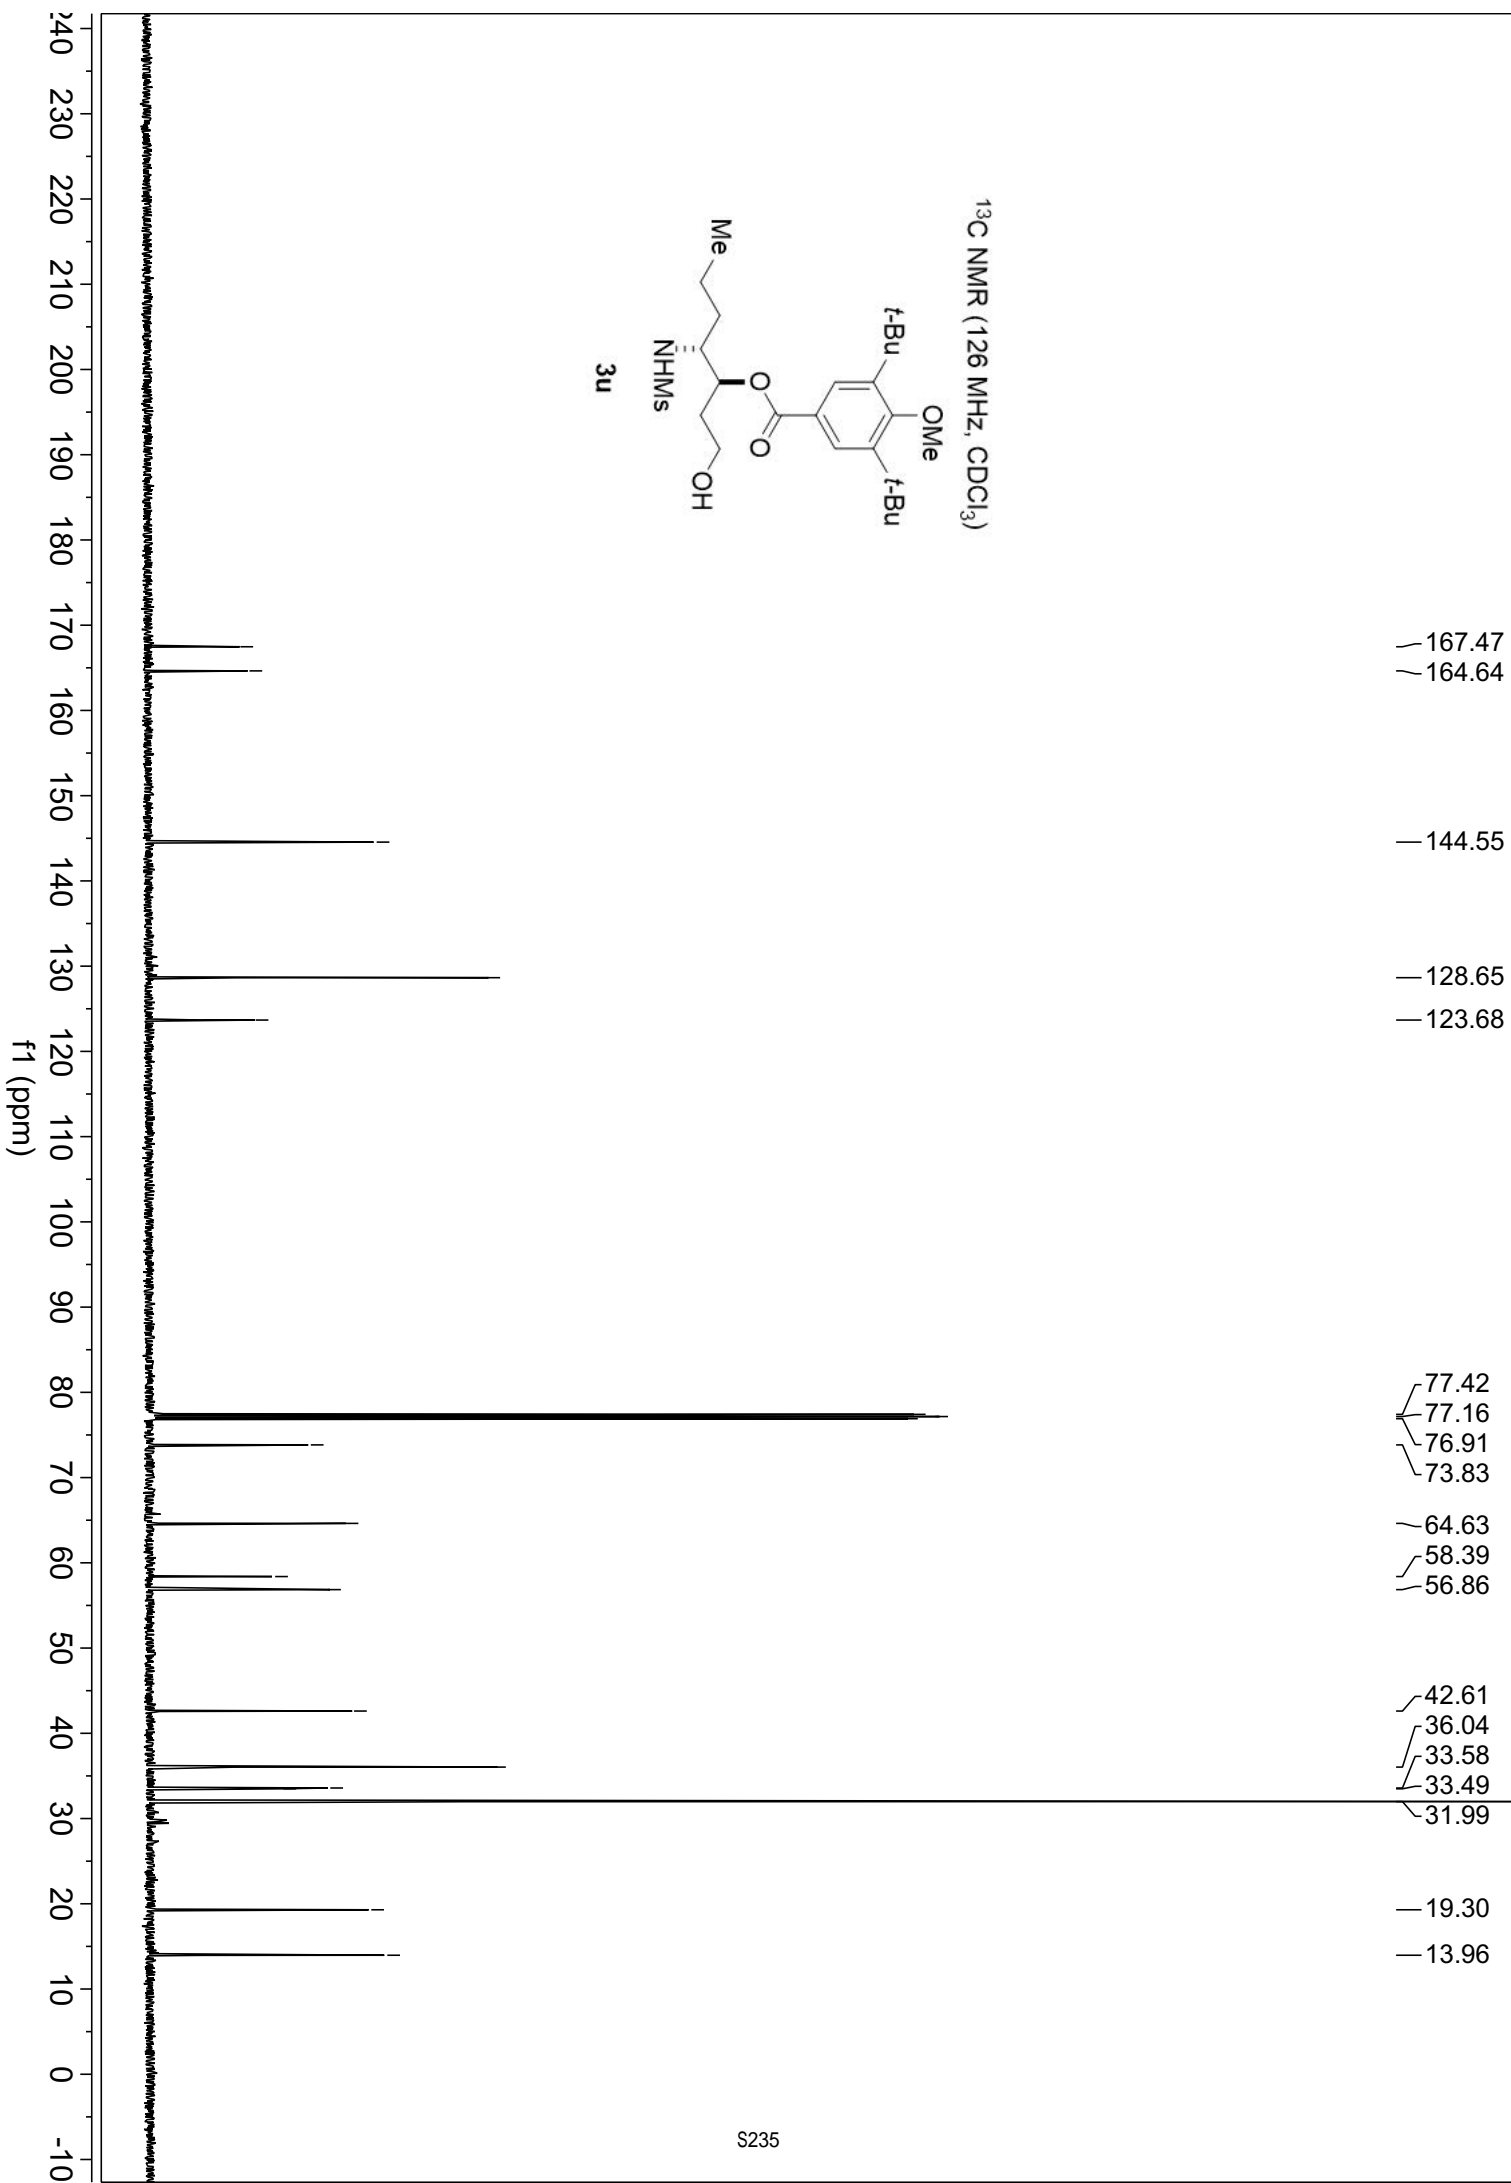

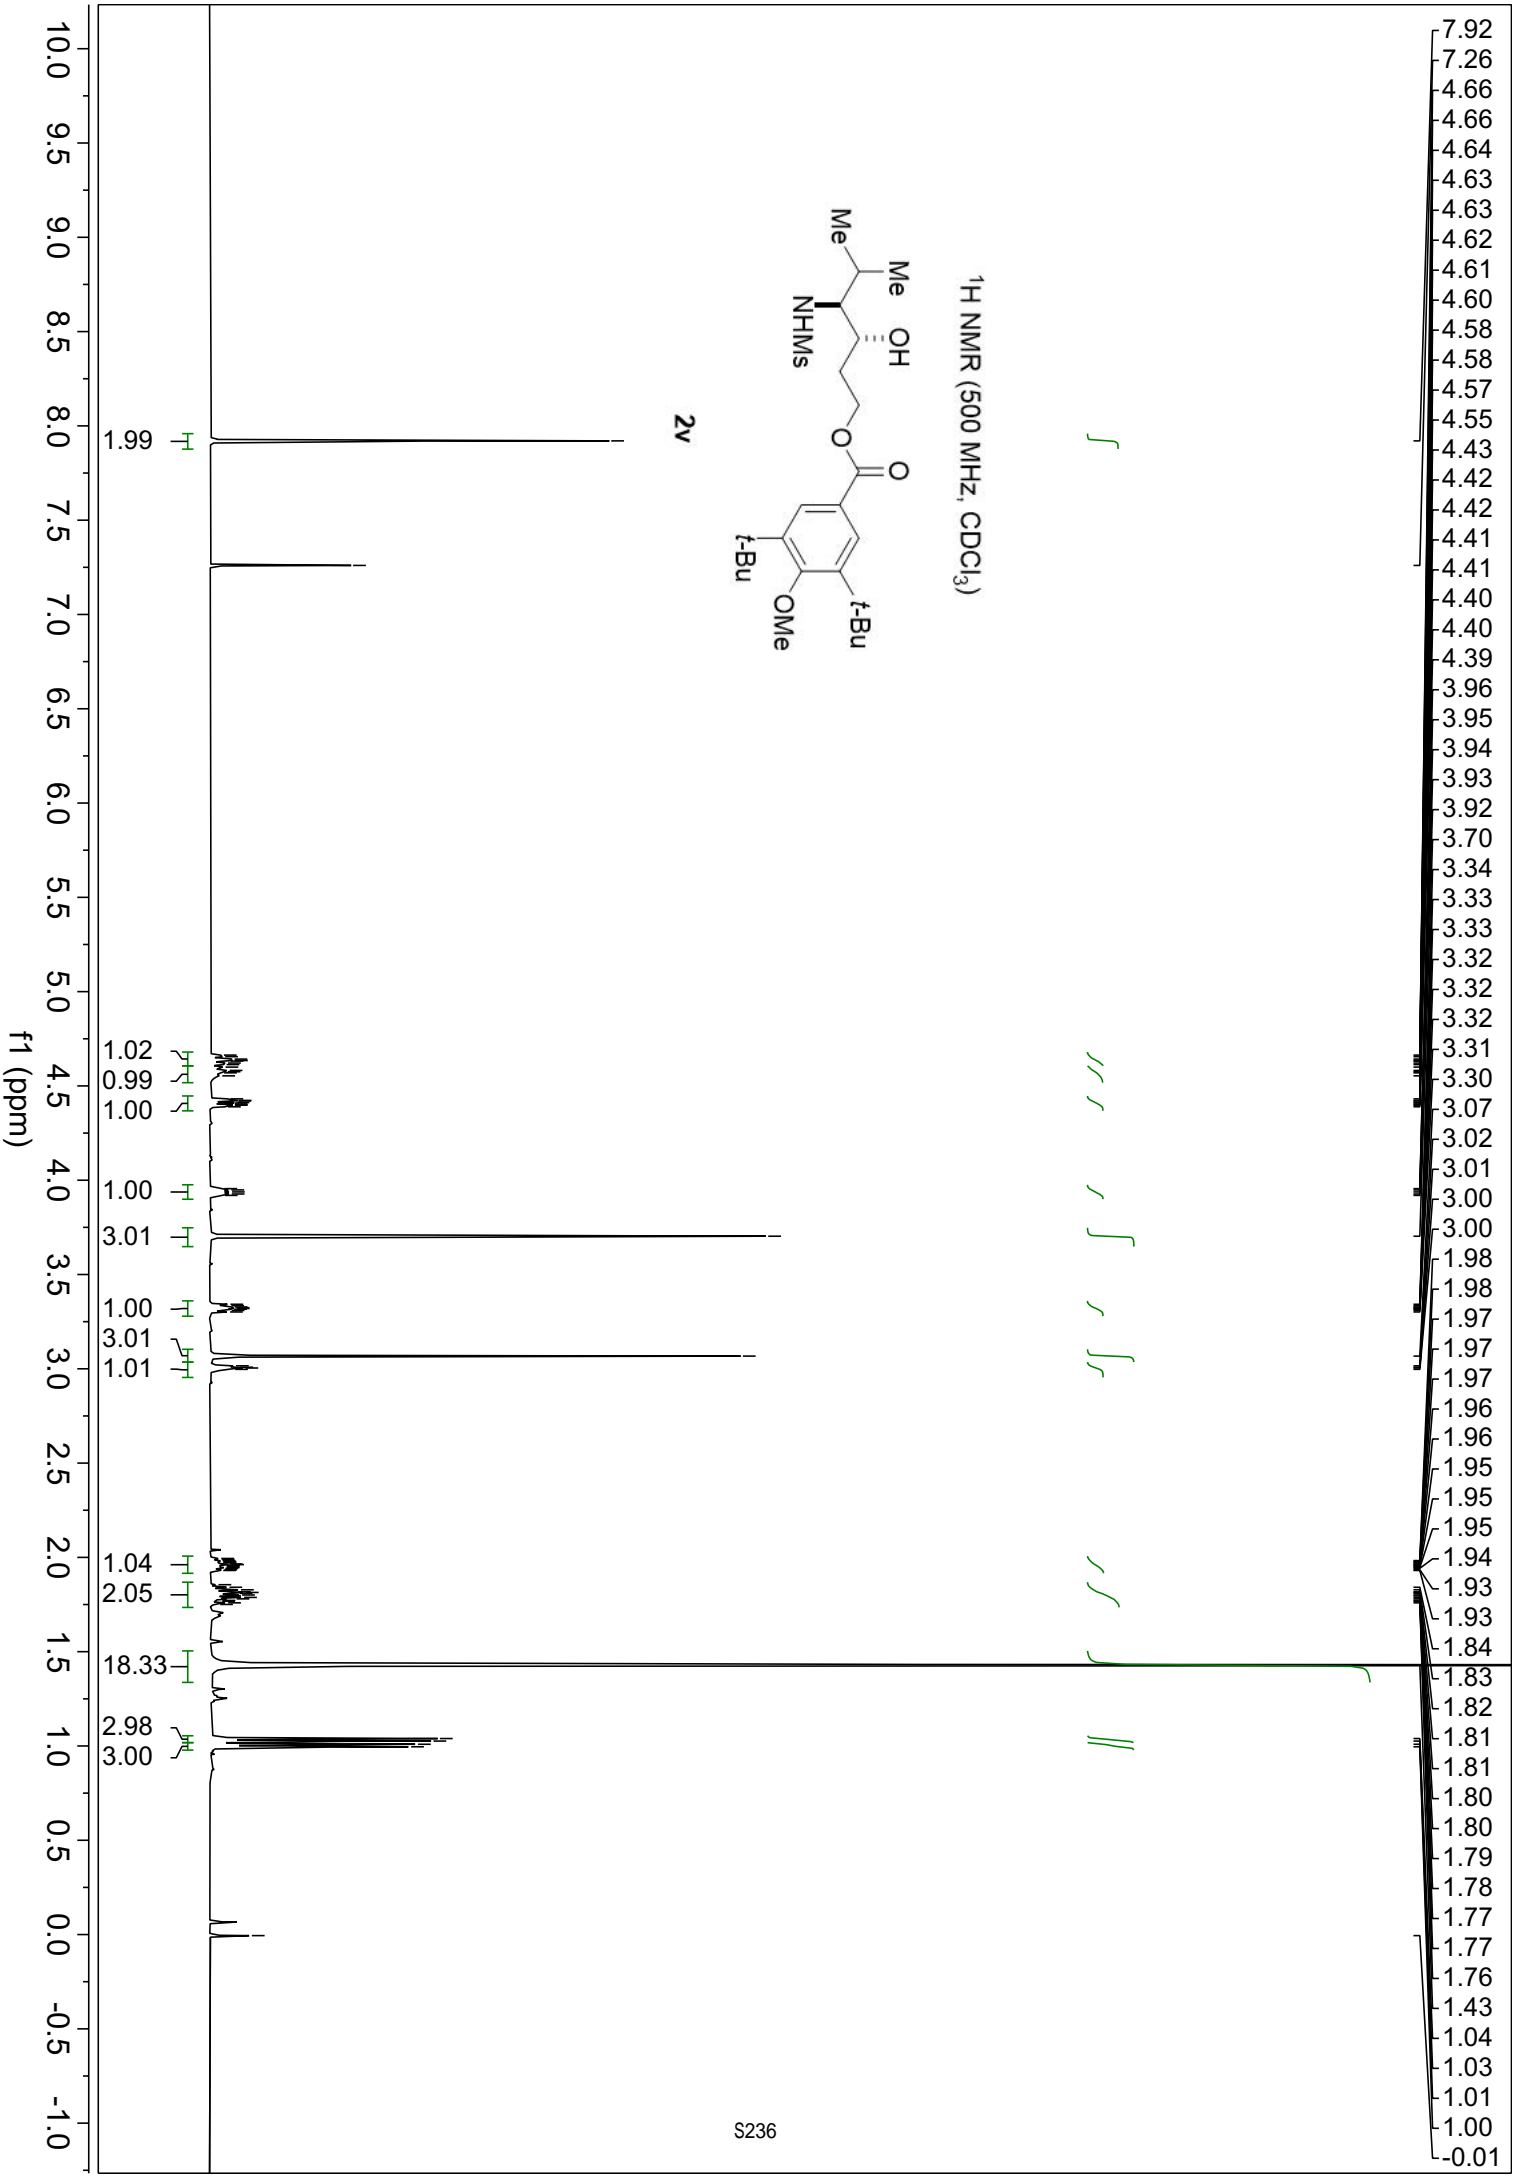

$^{13}\text{C}$  NMR (126 MHz,  $\text{CDCl}_3$ )

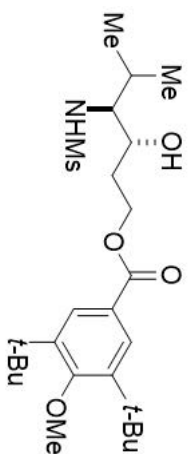

2v

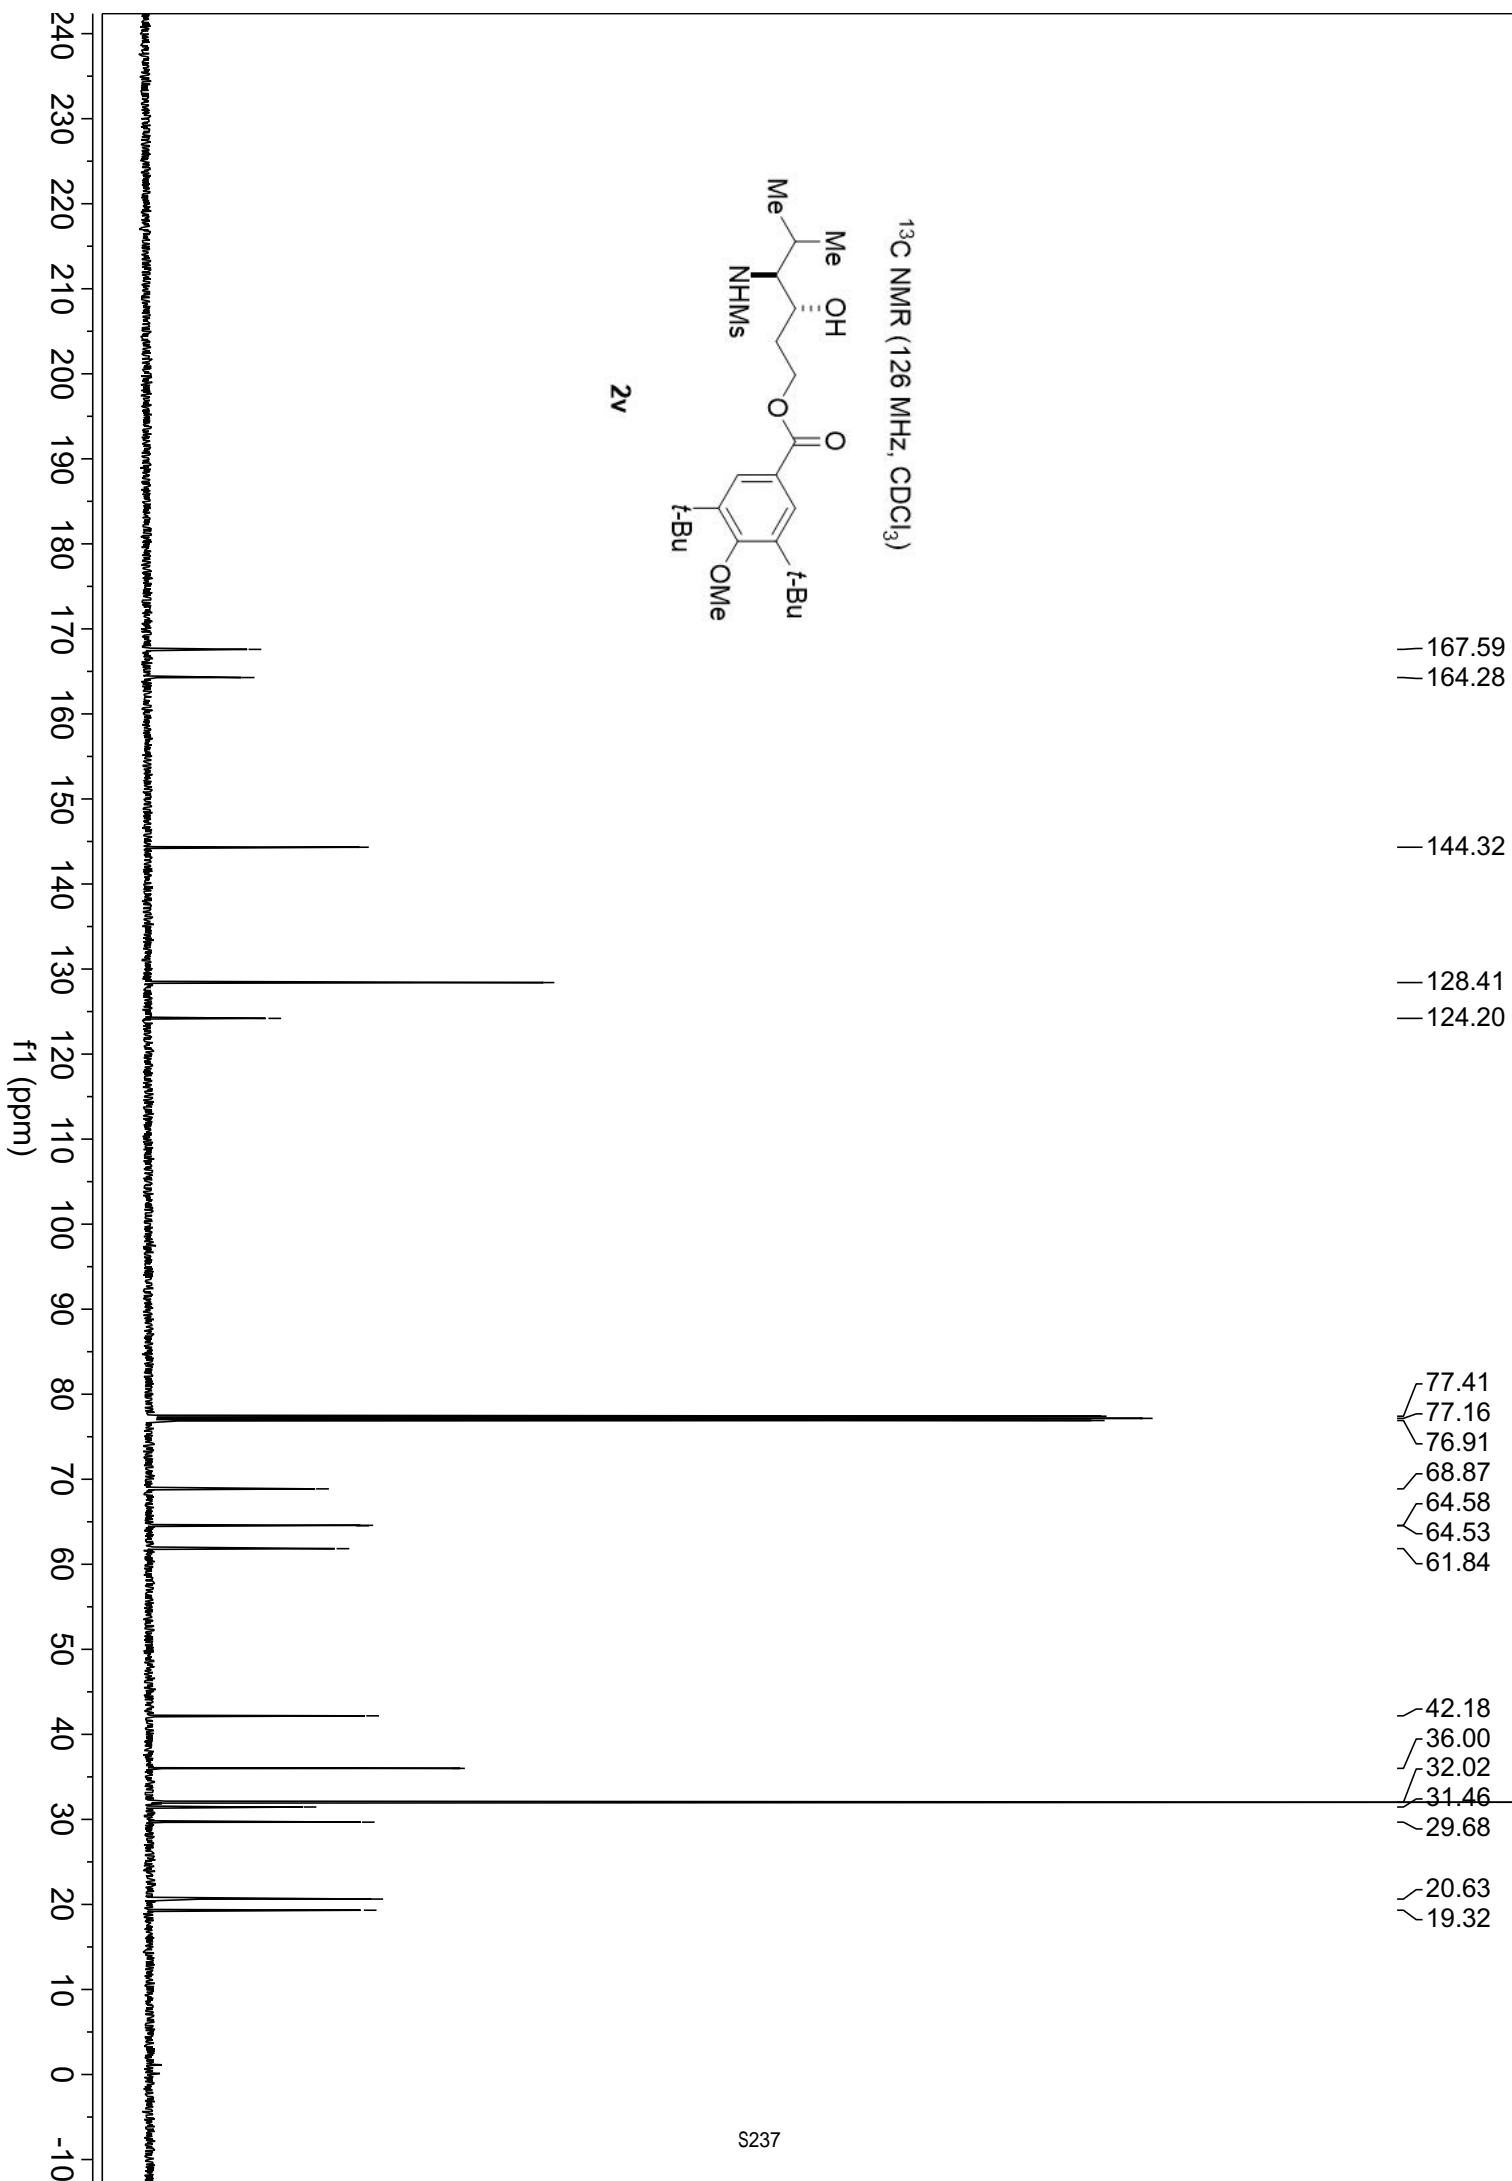

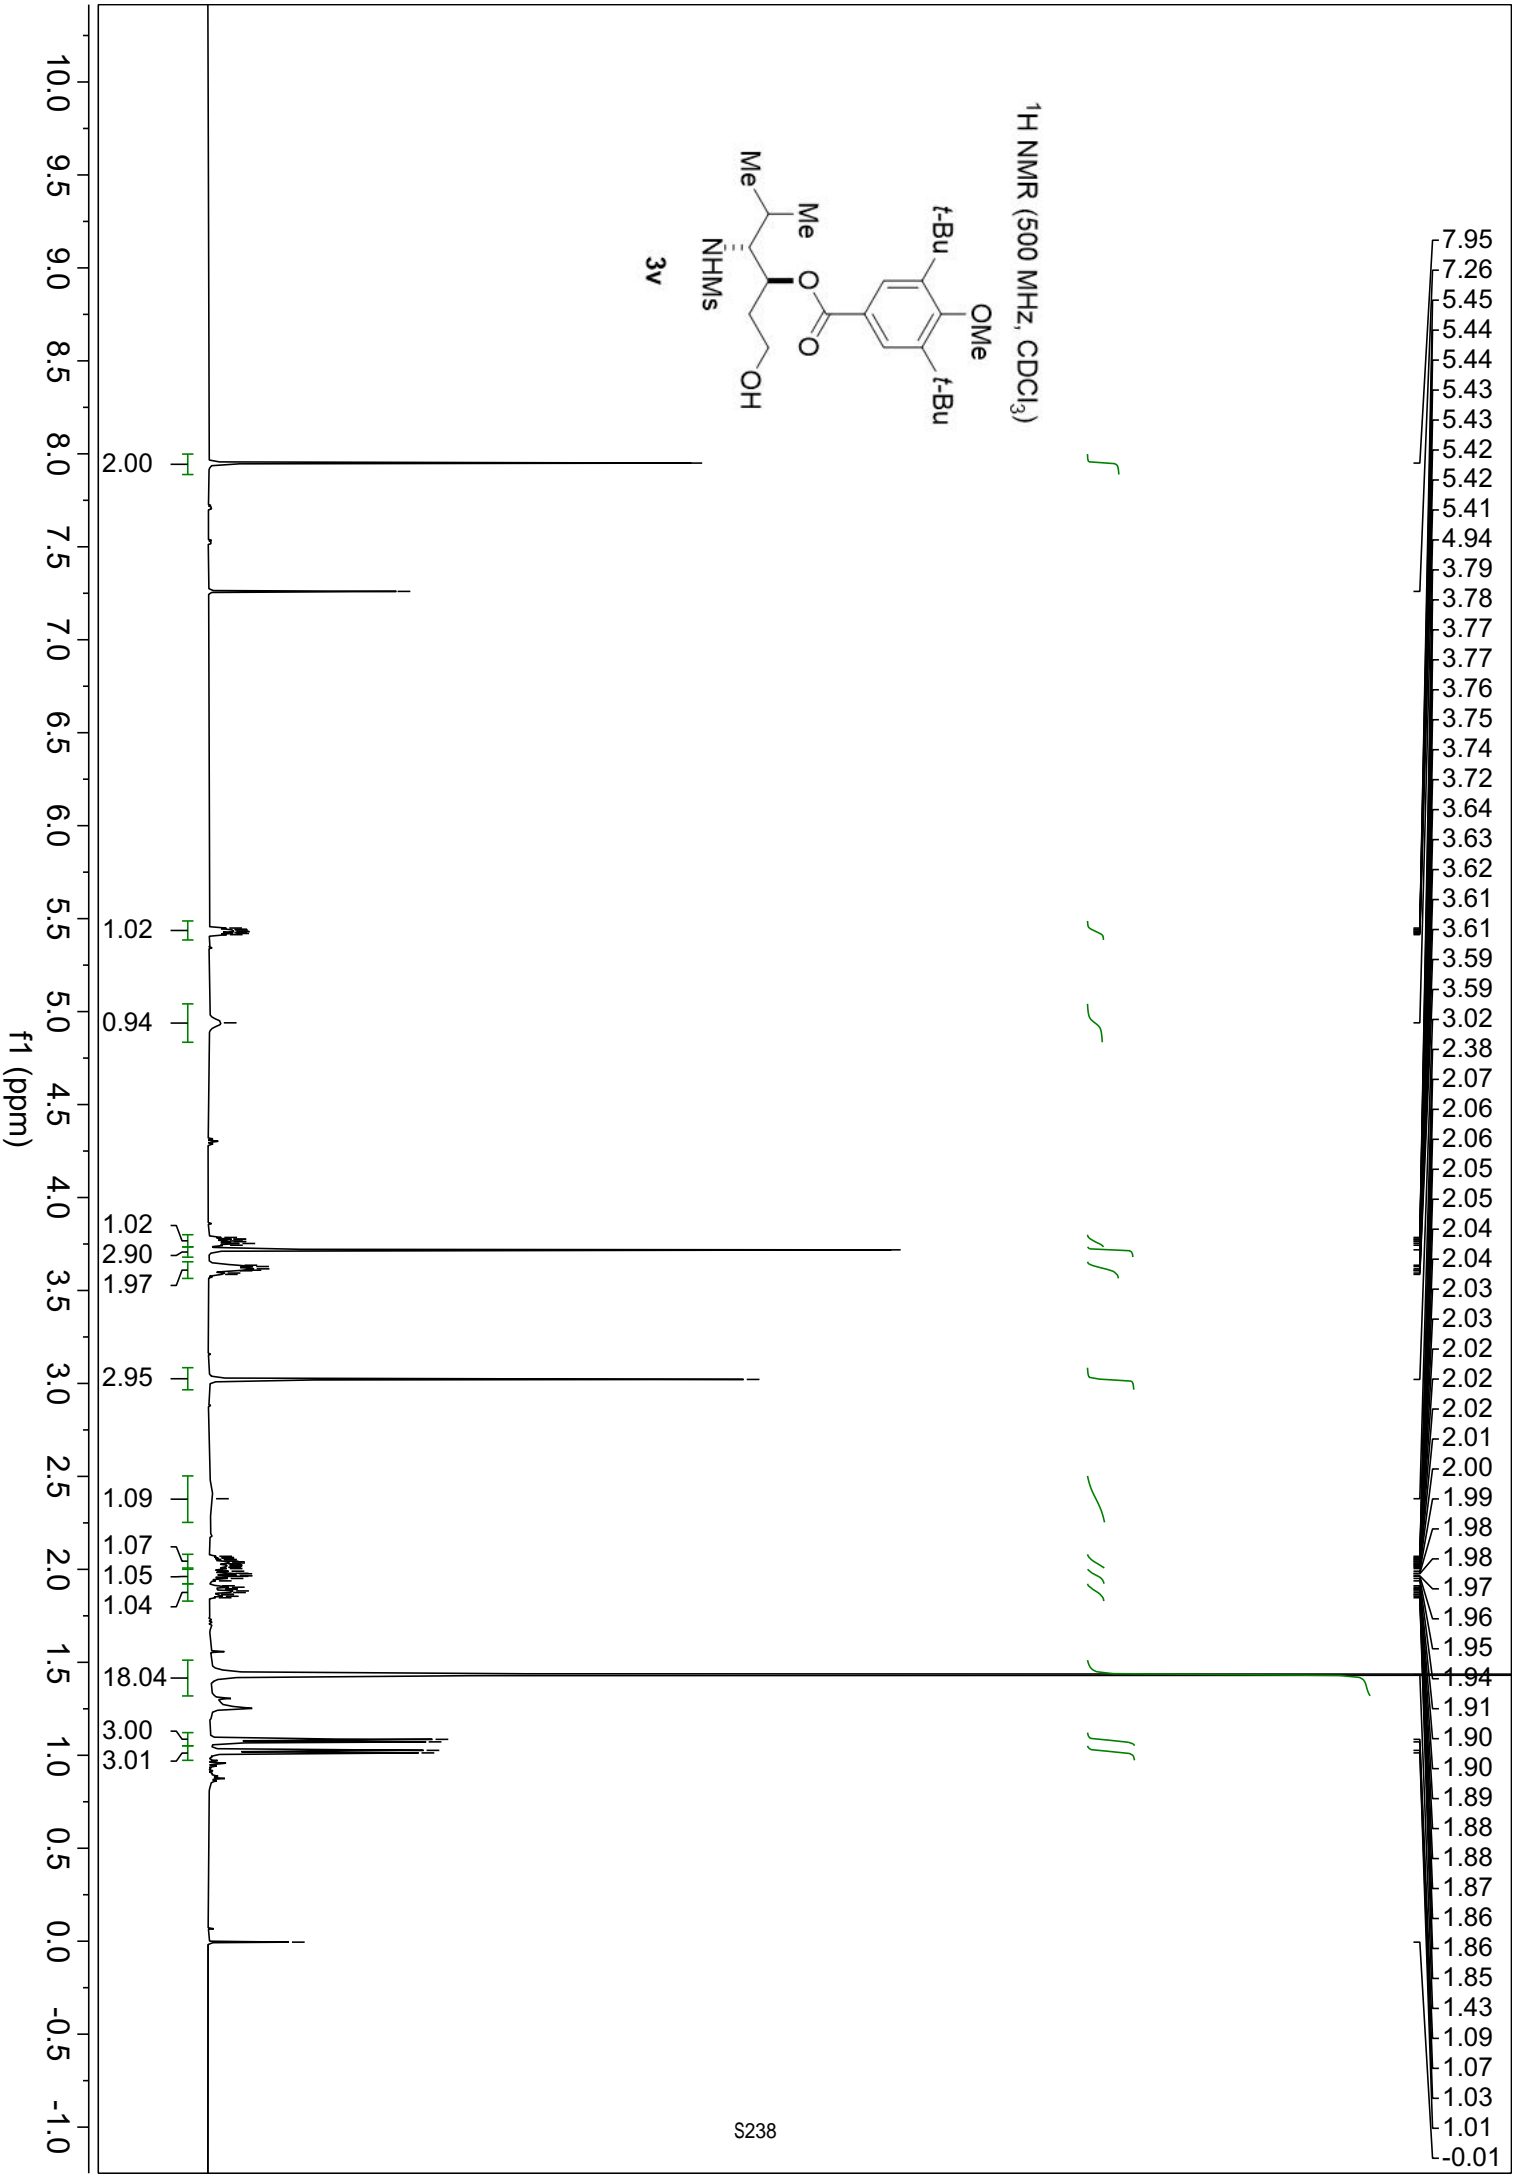

<sup>13</sup>C NMR (126 MHz, CDCl<sub>3</sub>)

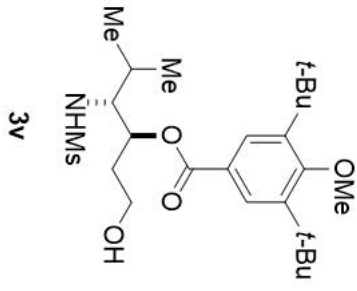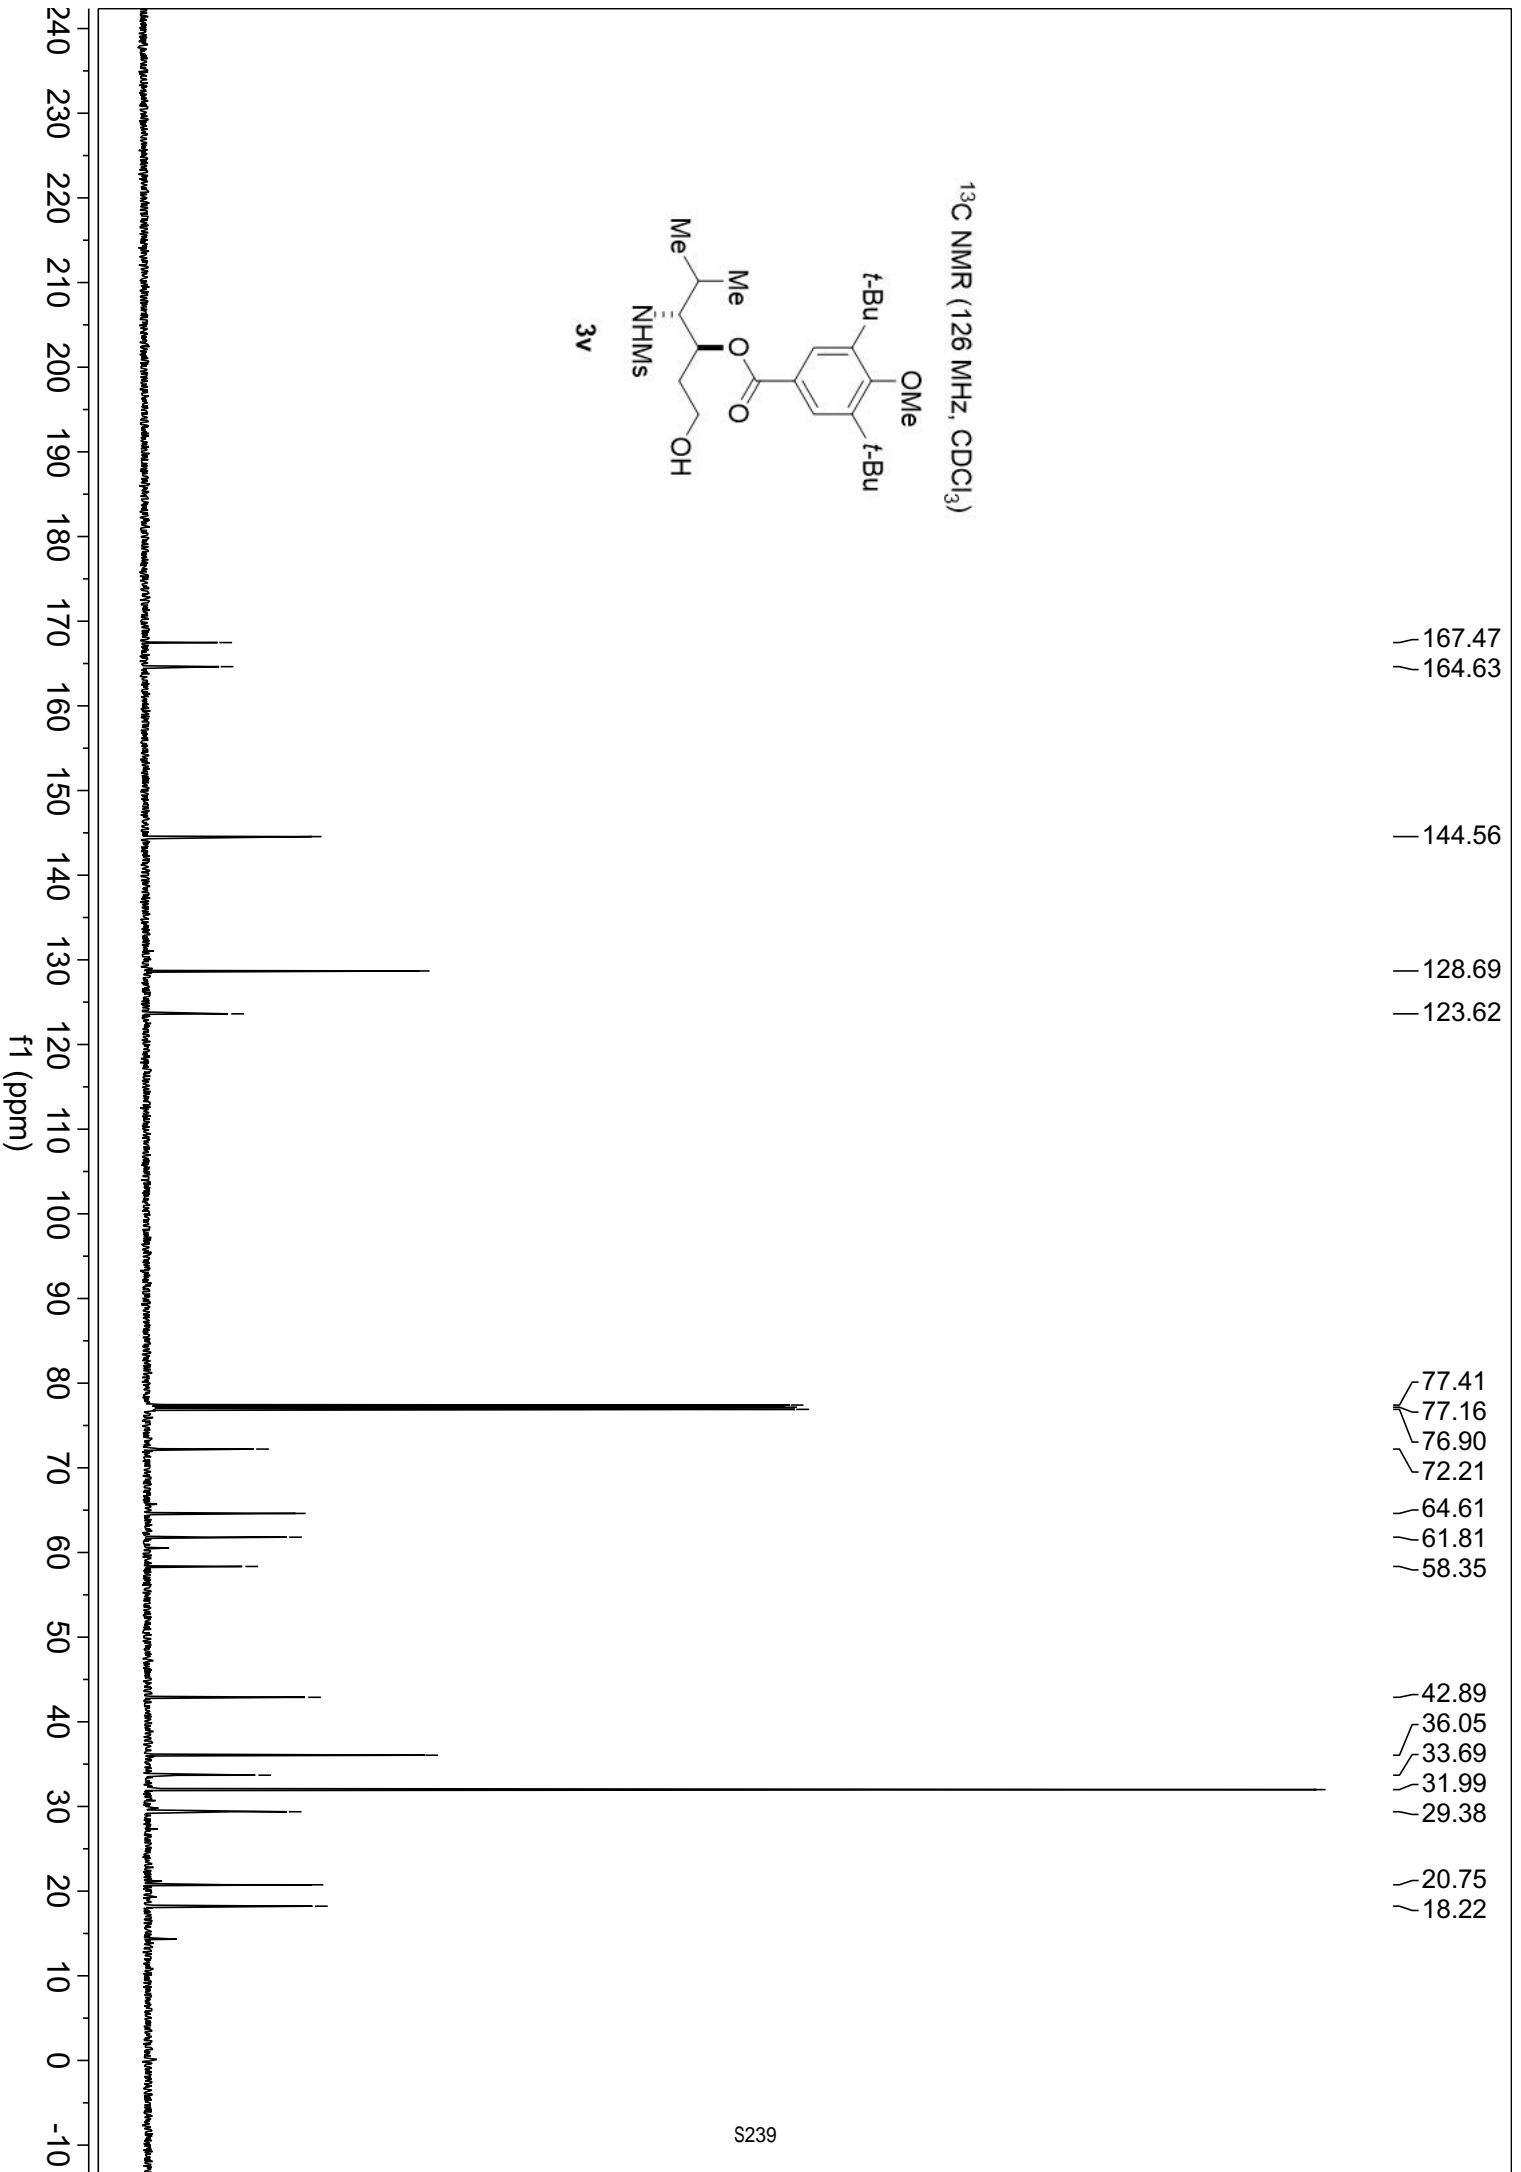

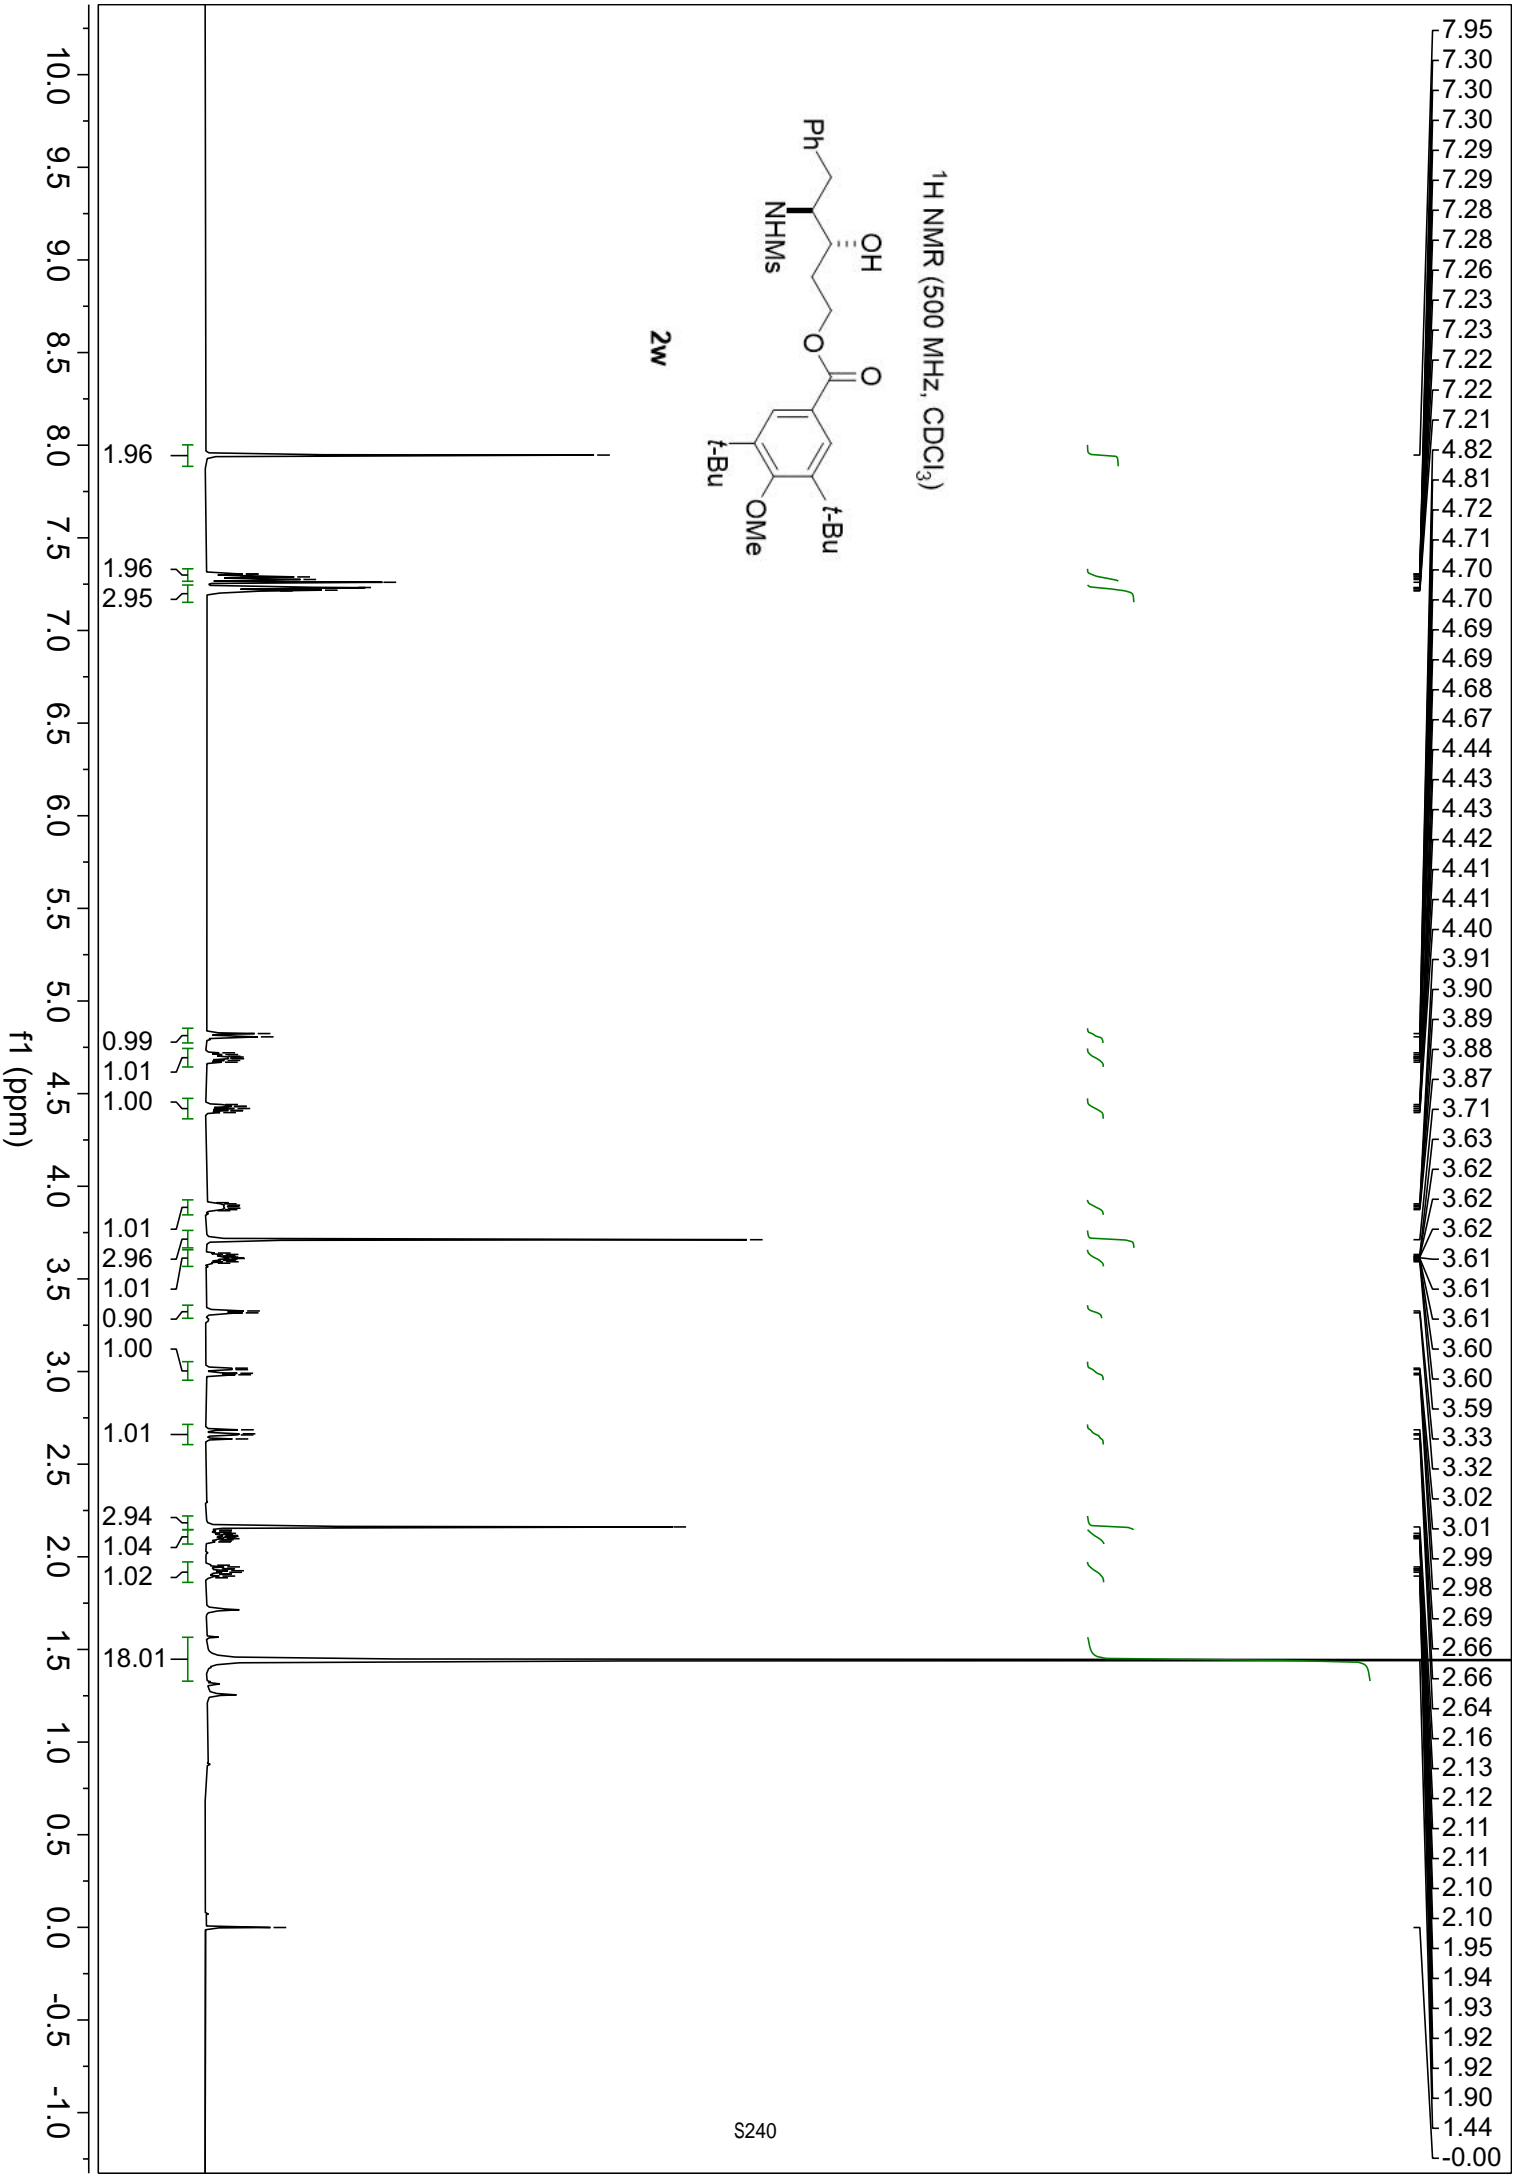



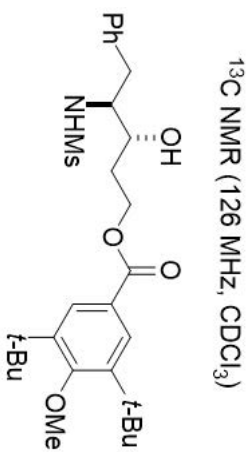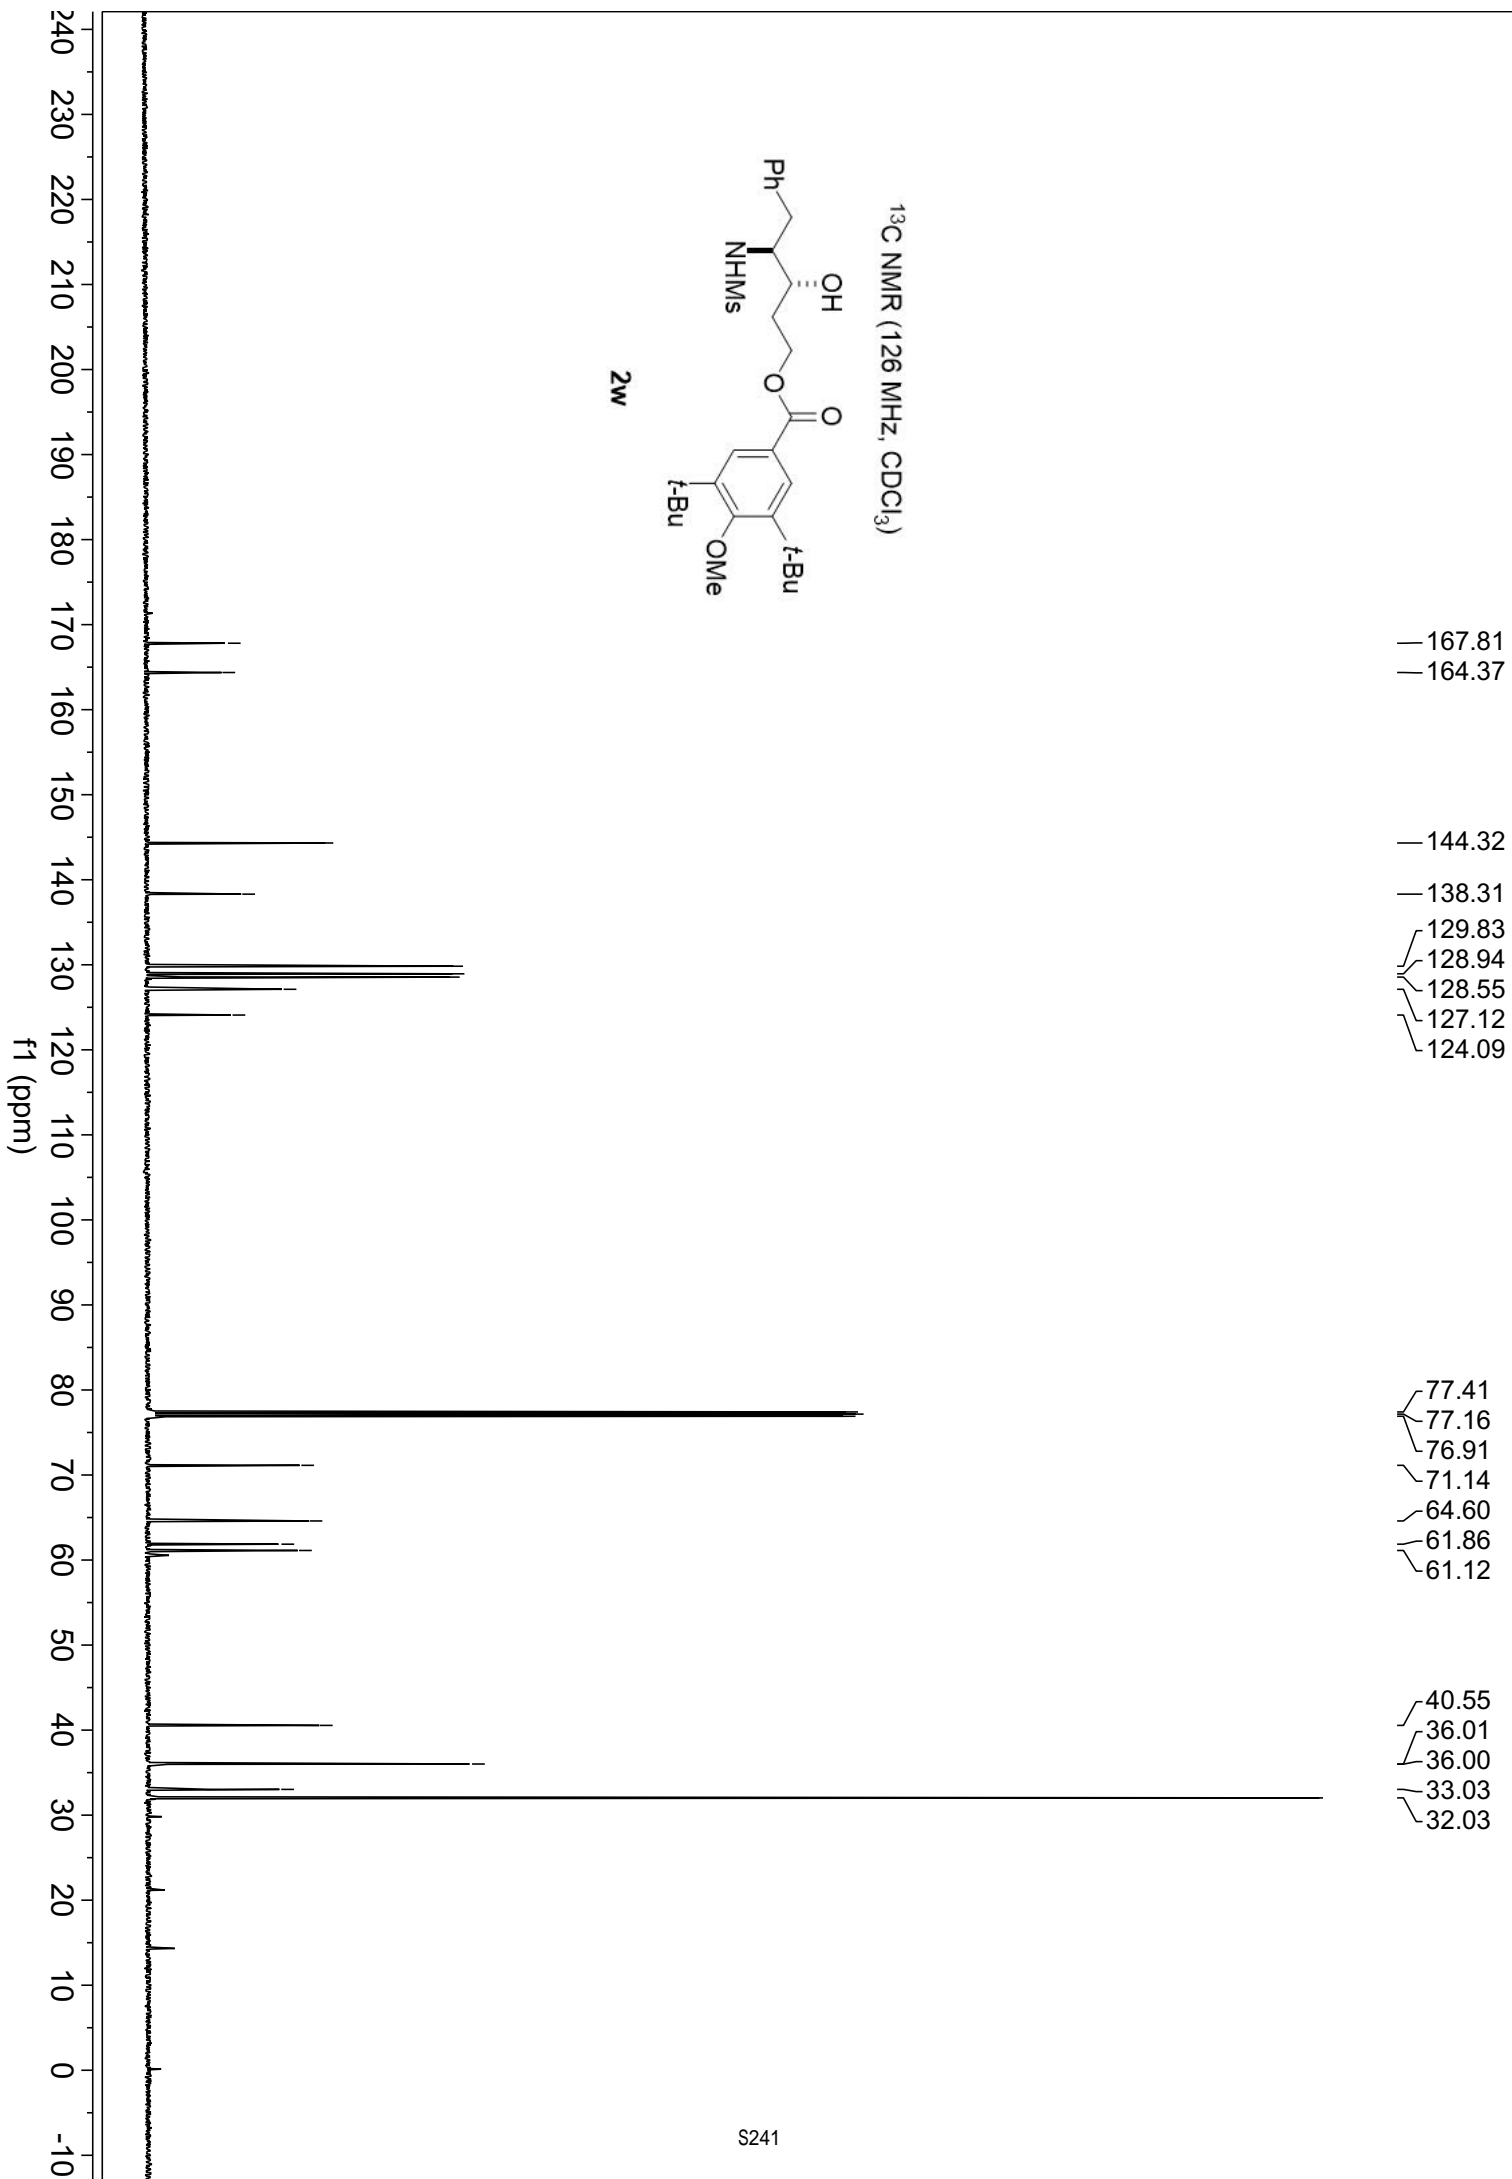

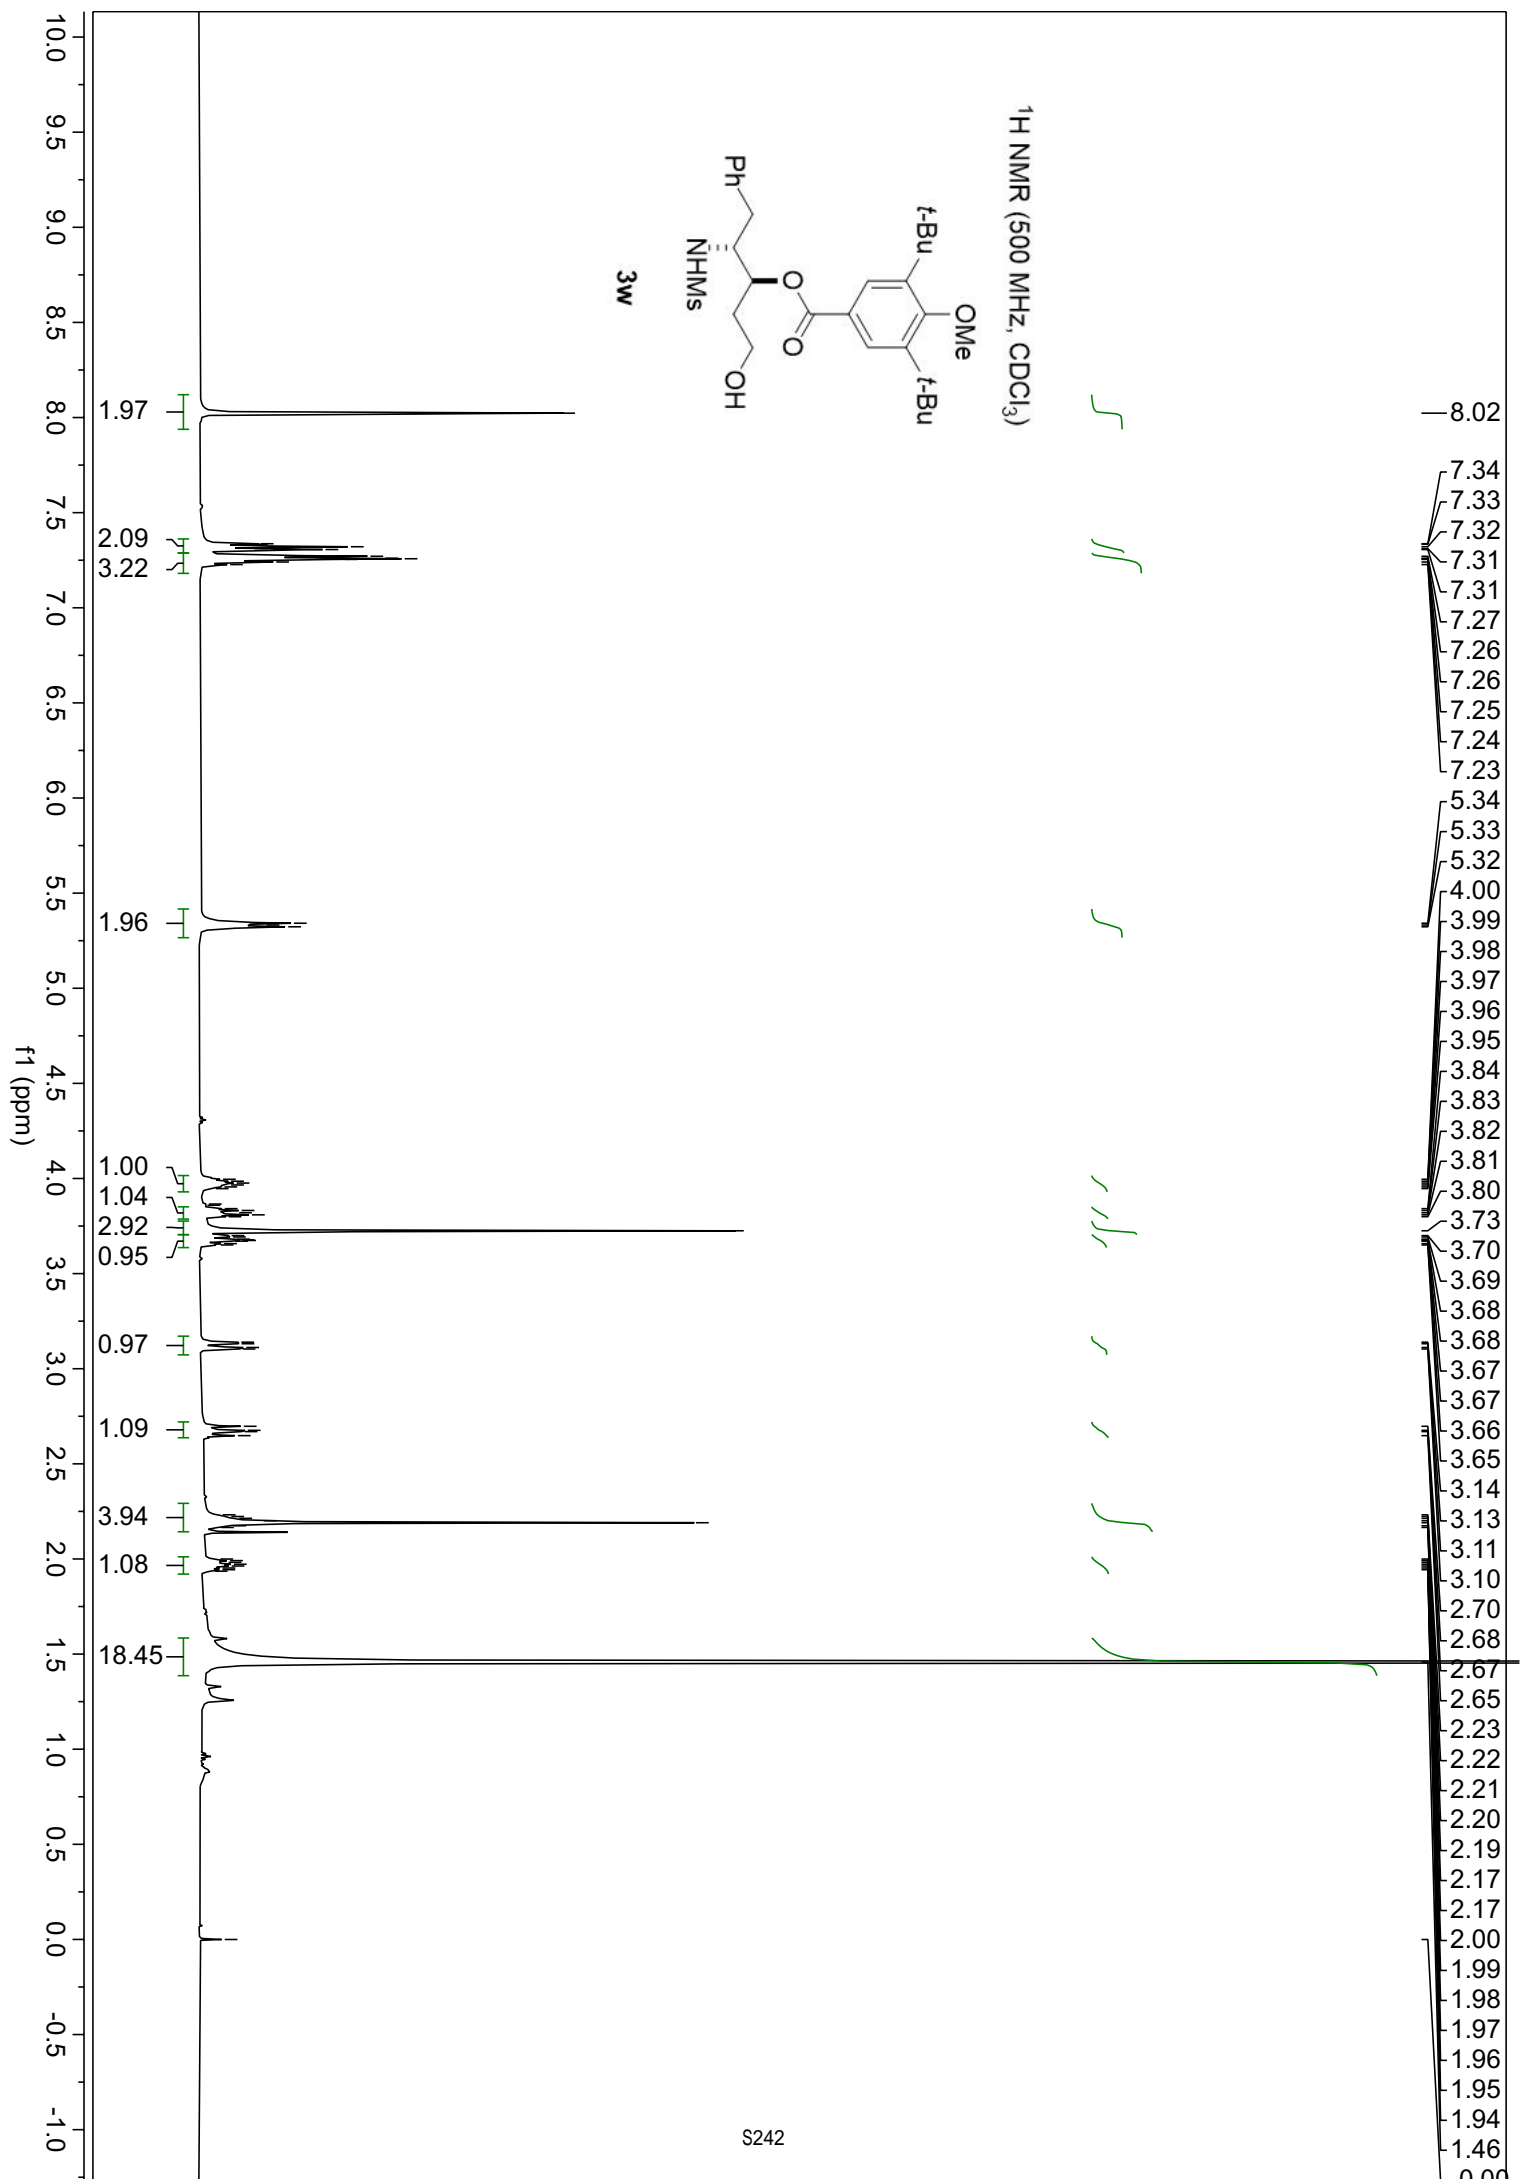

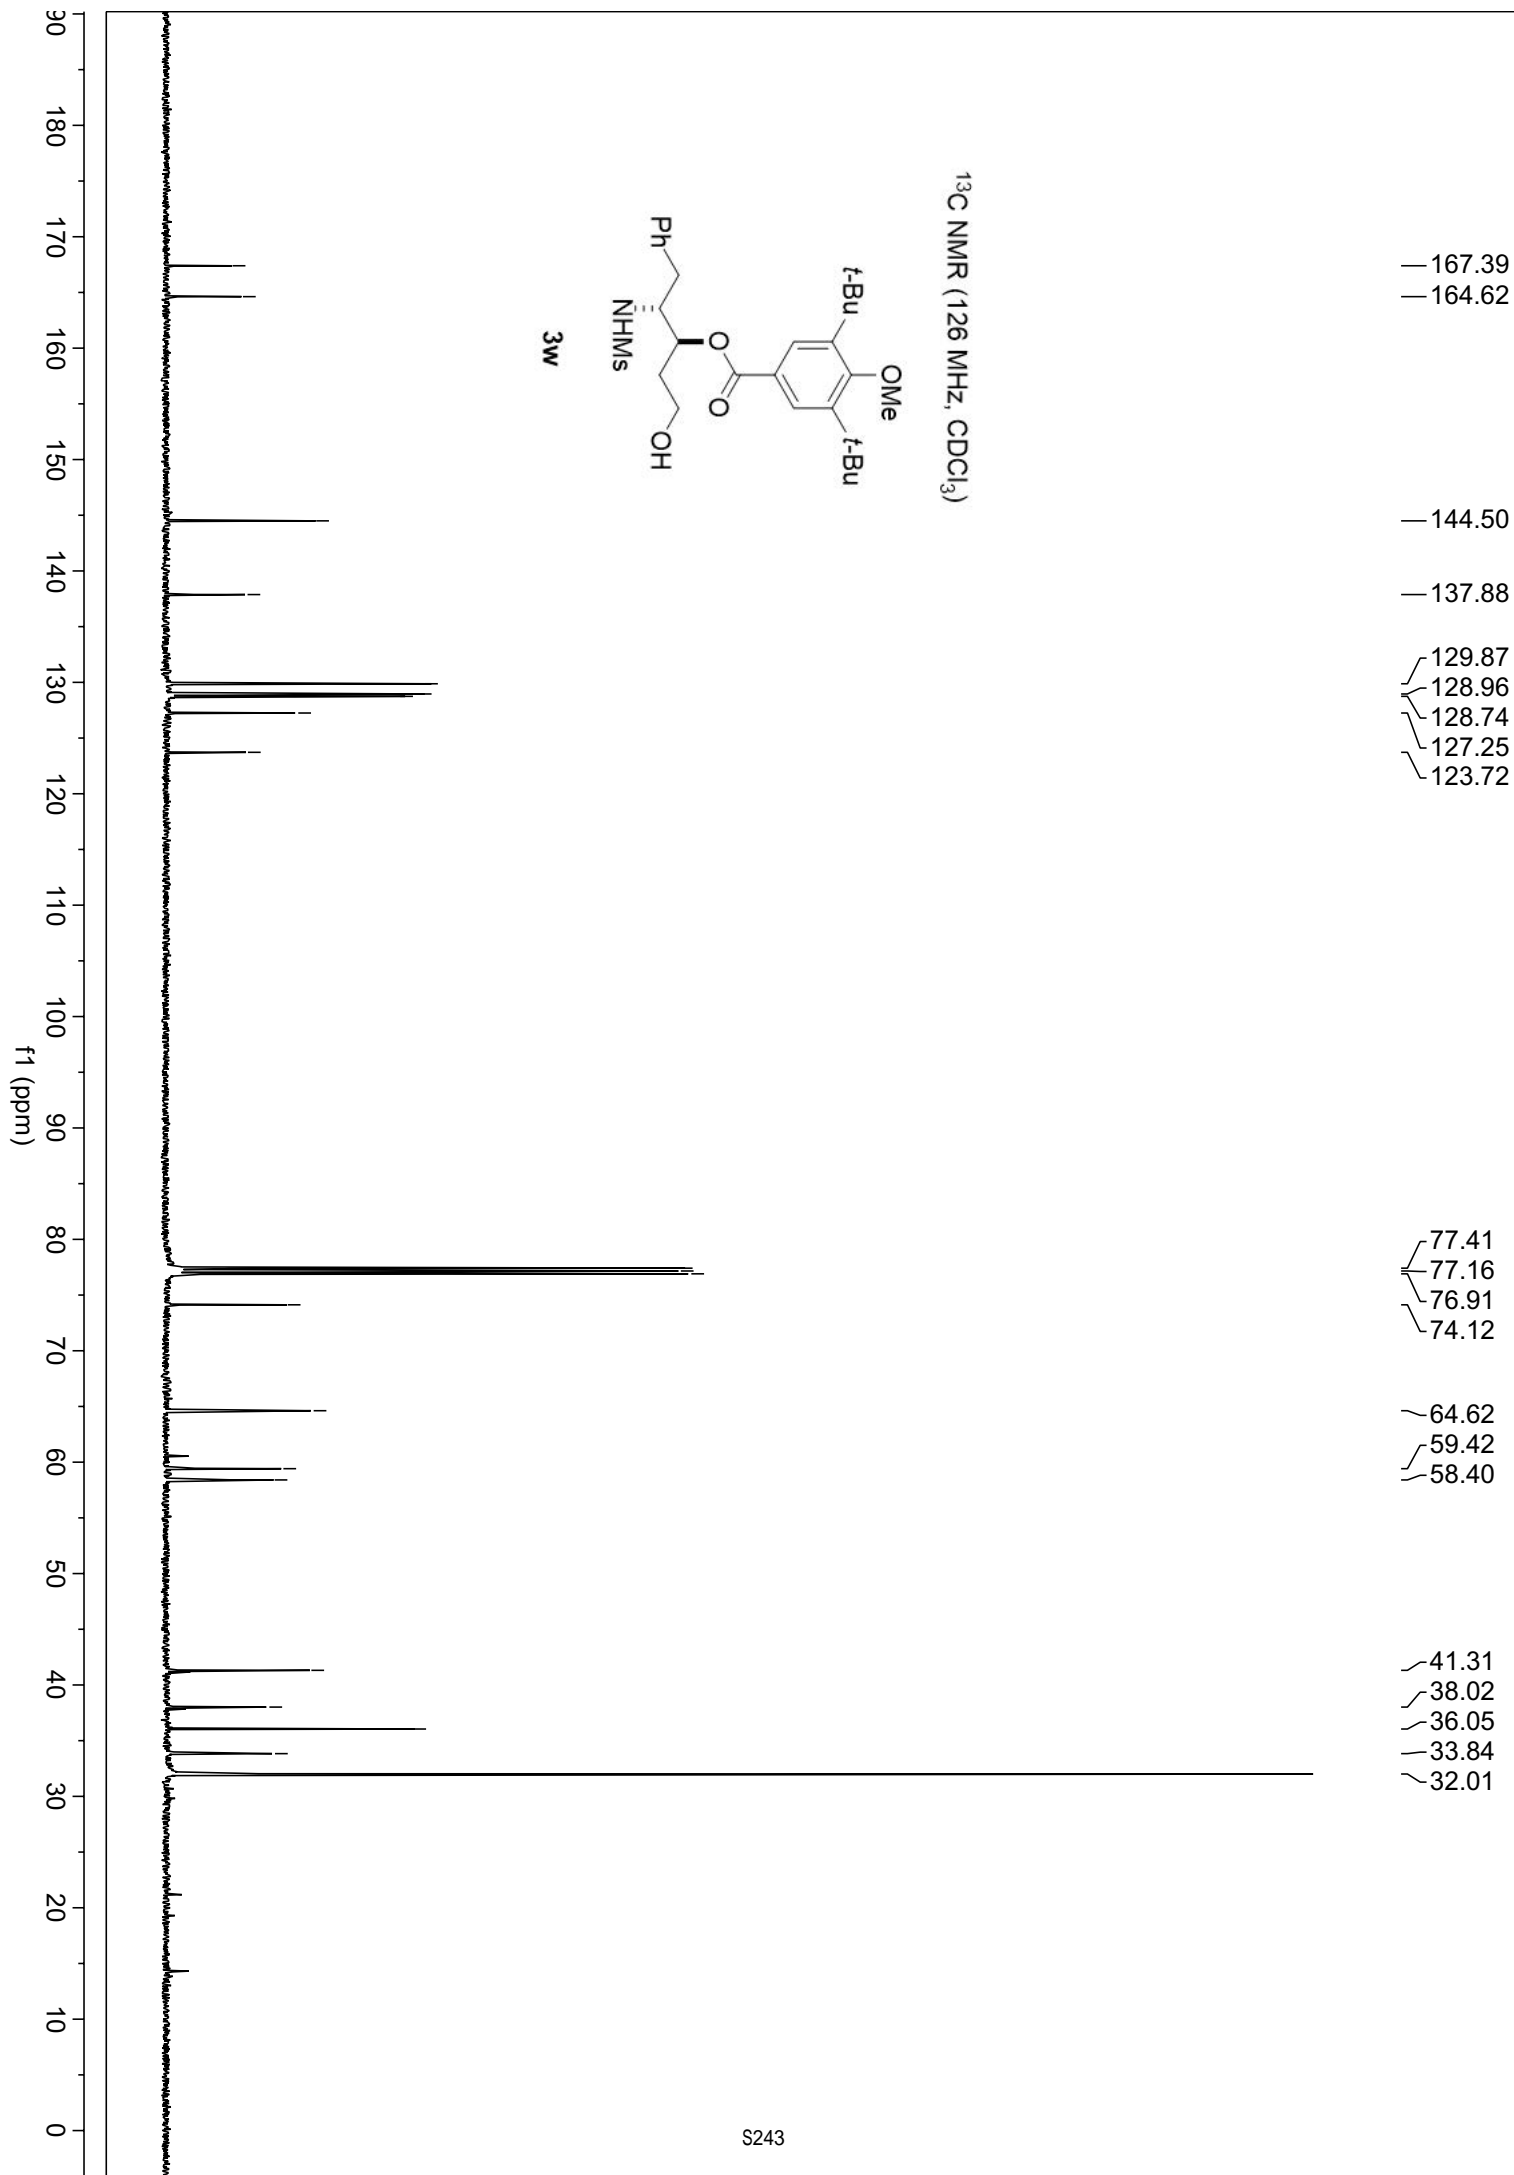

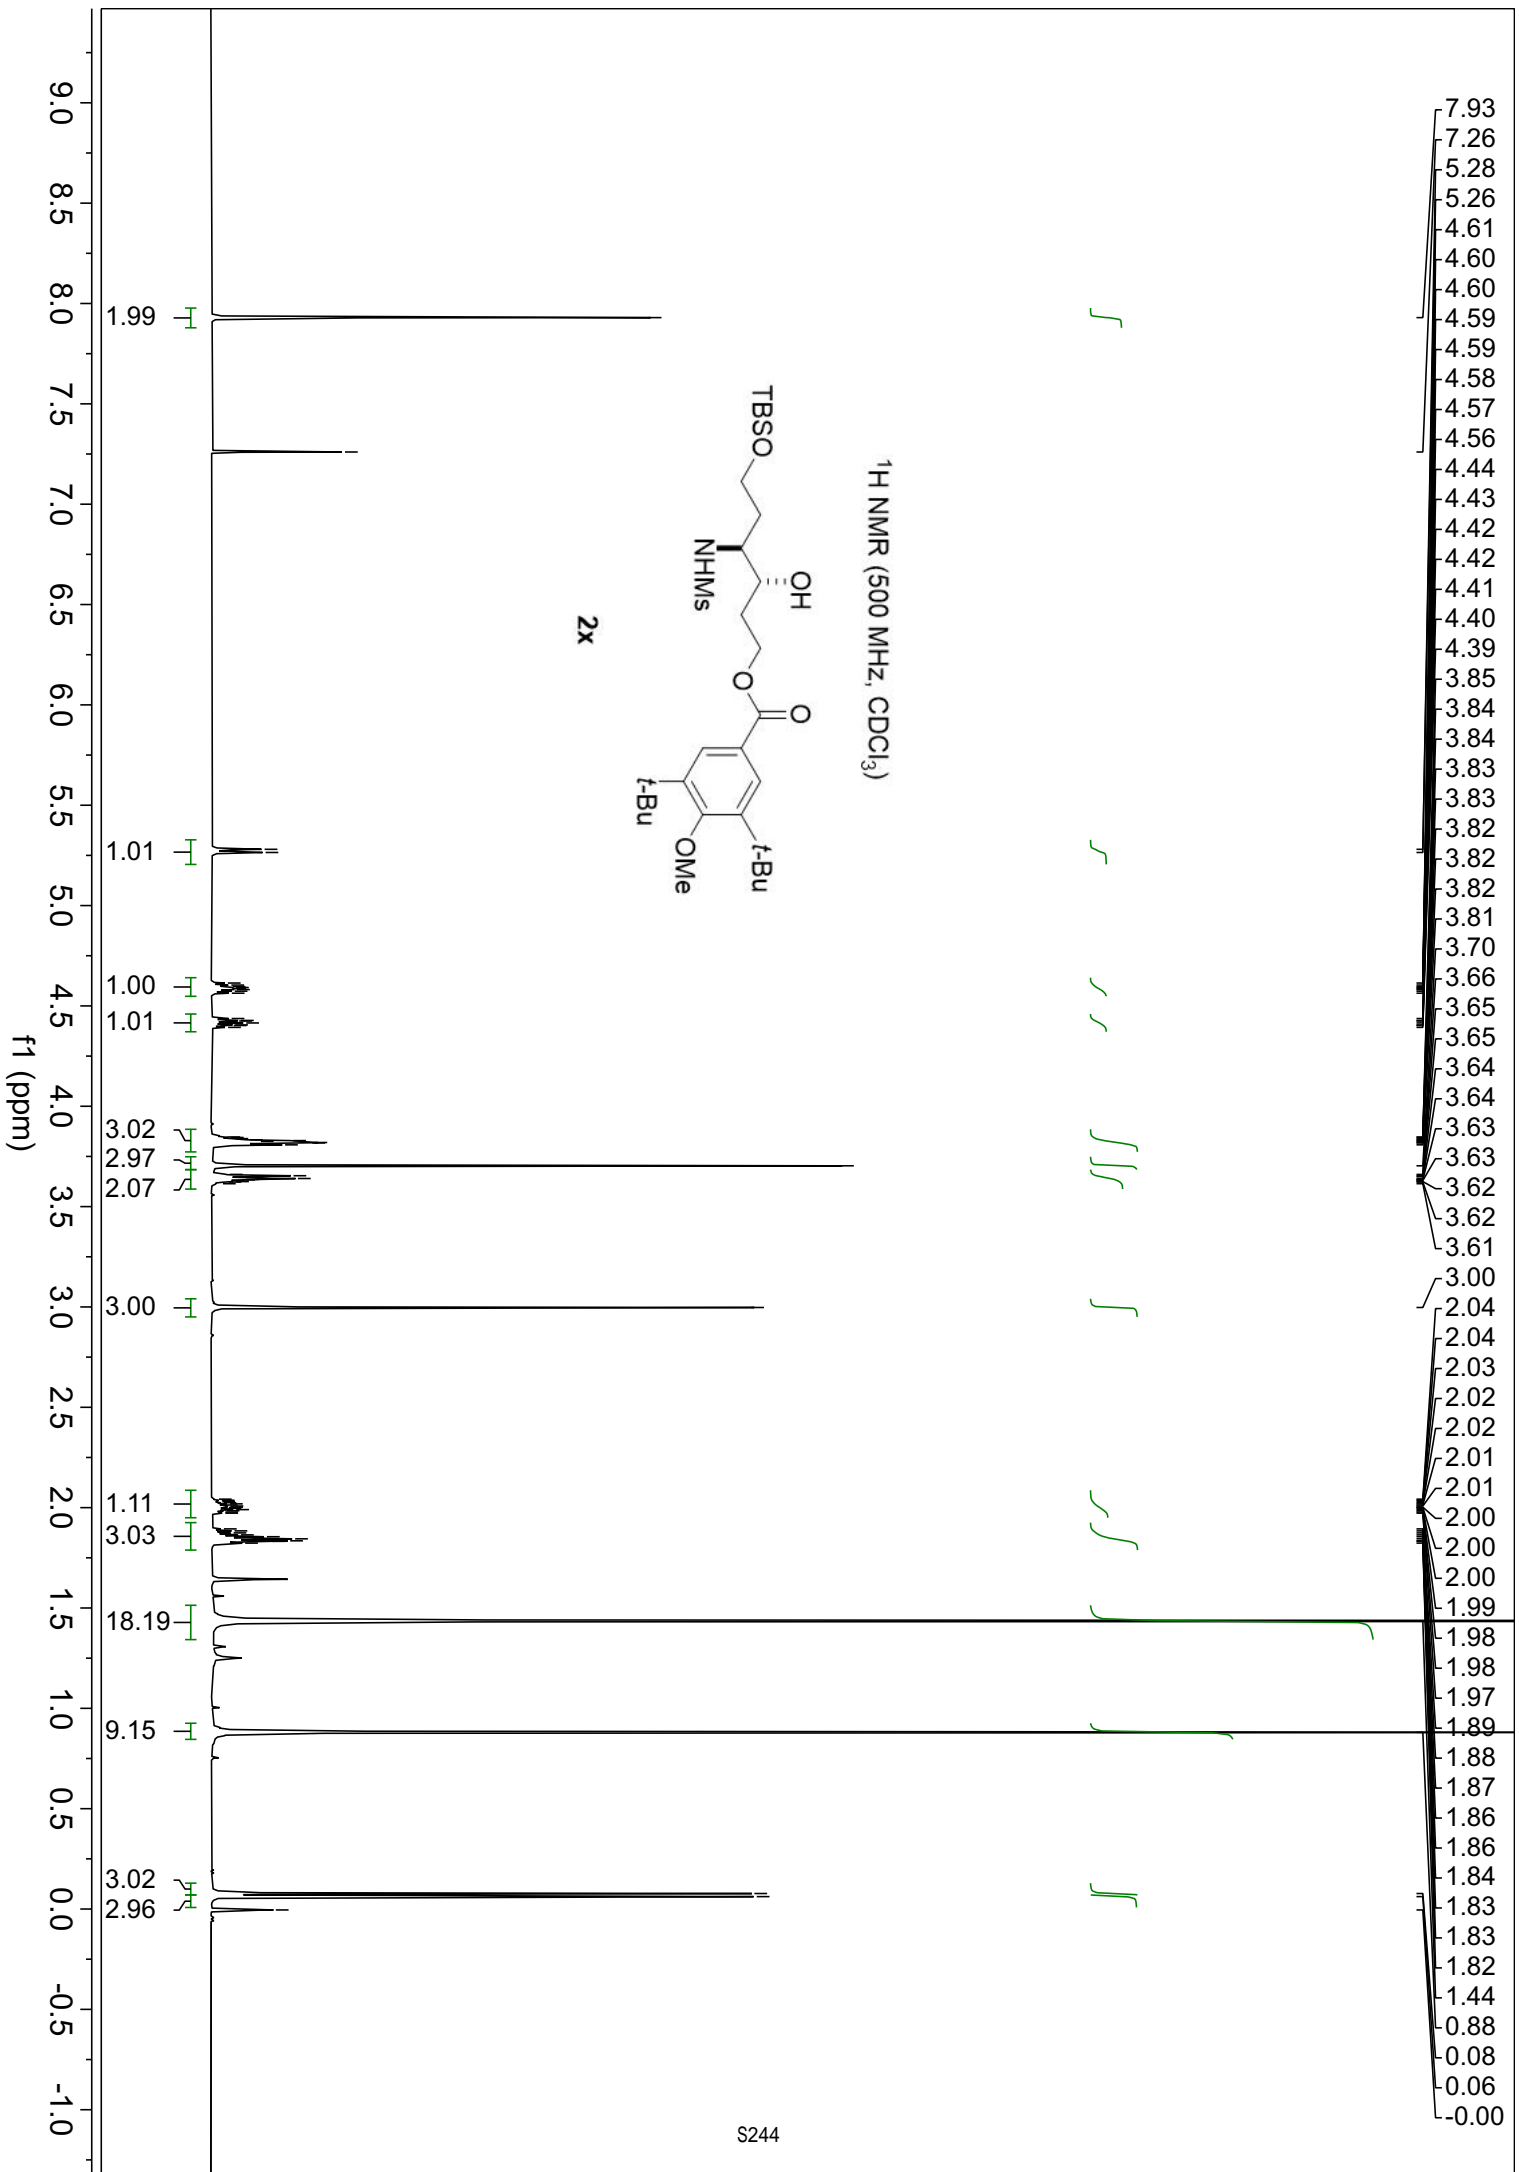

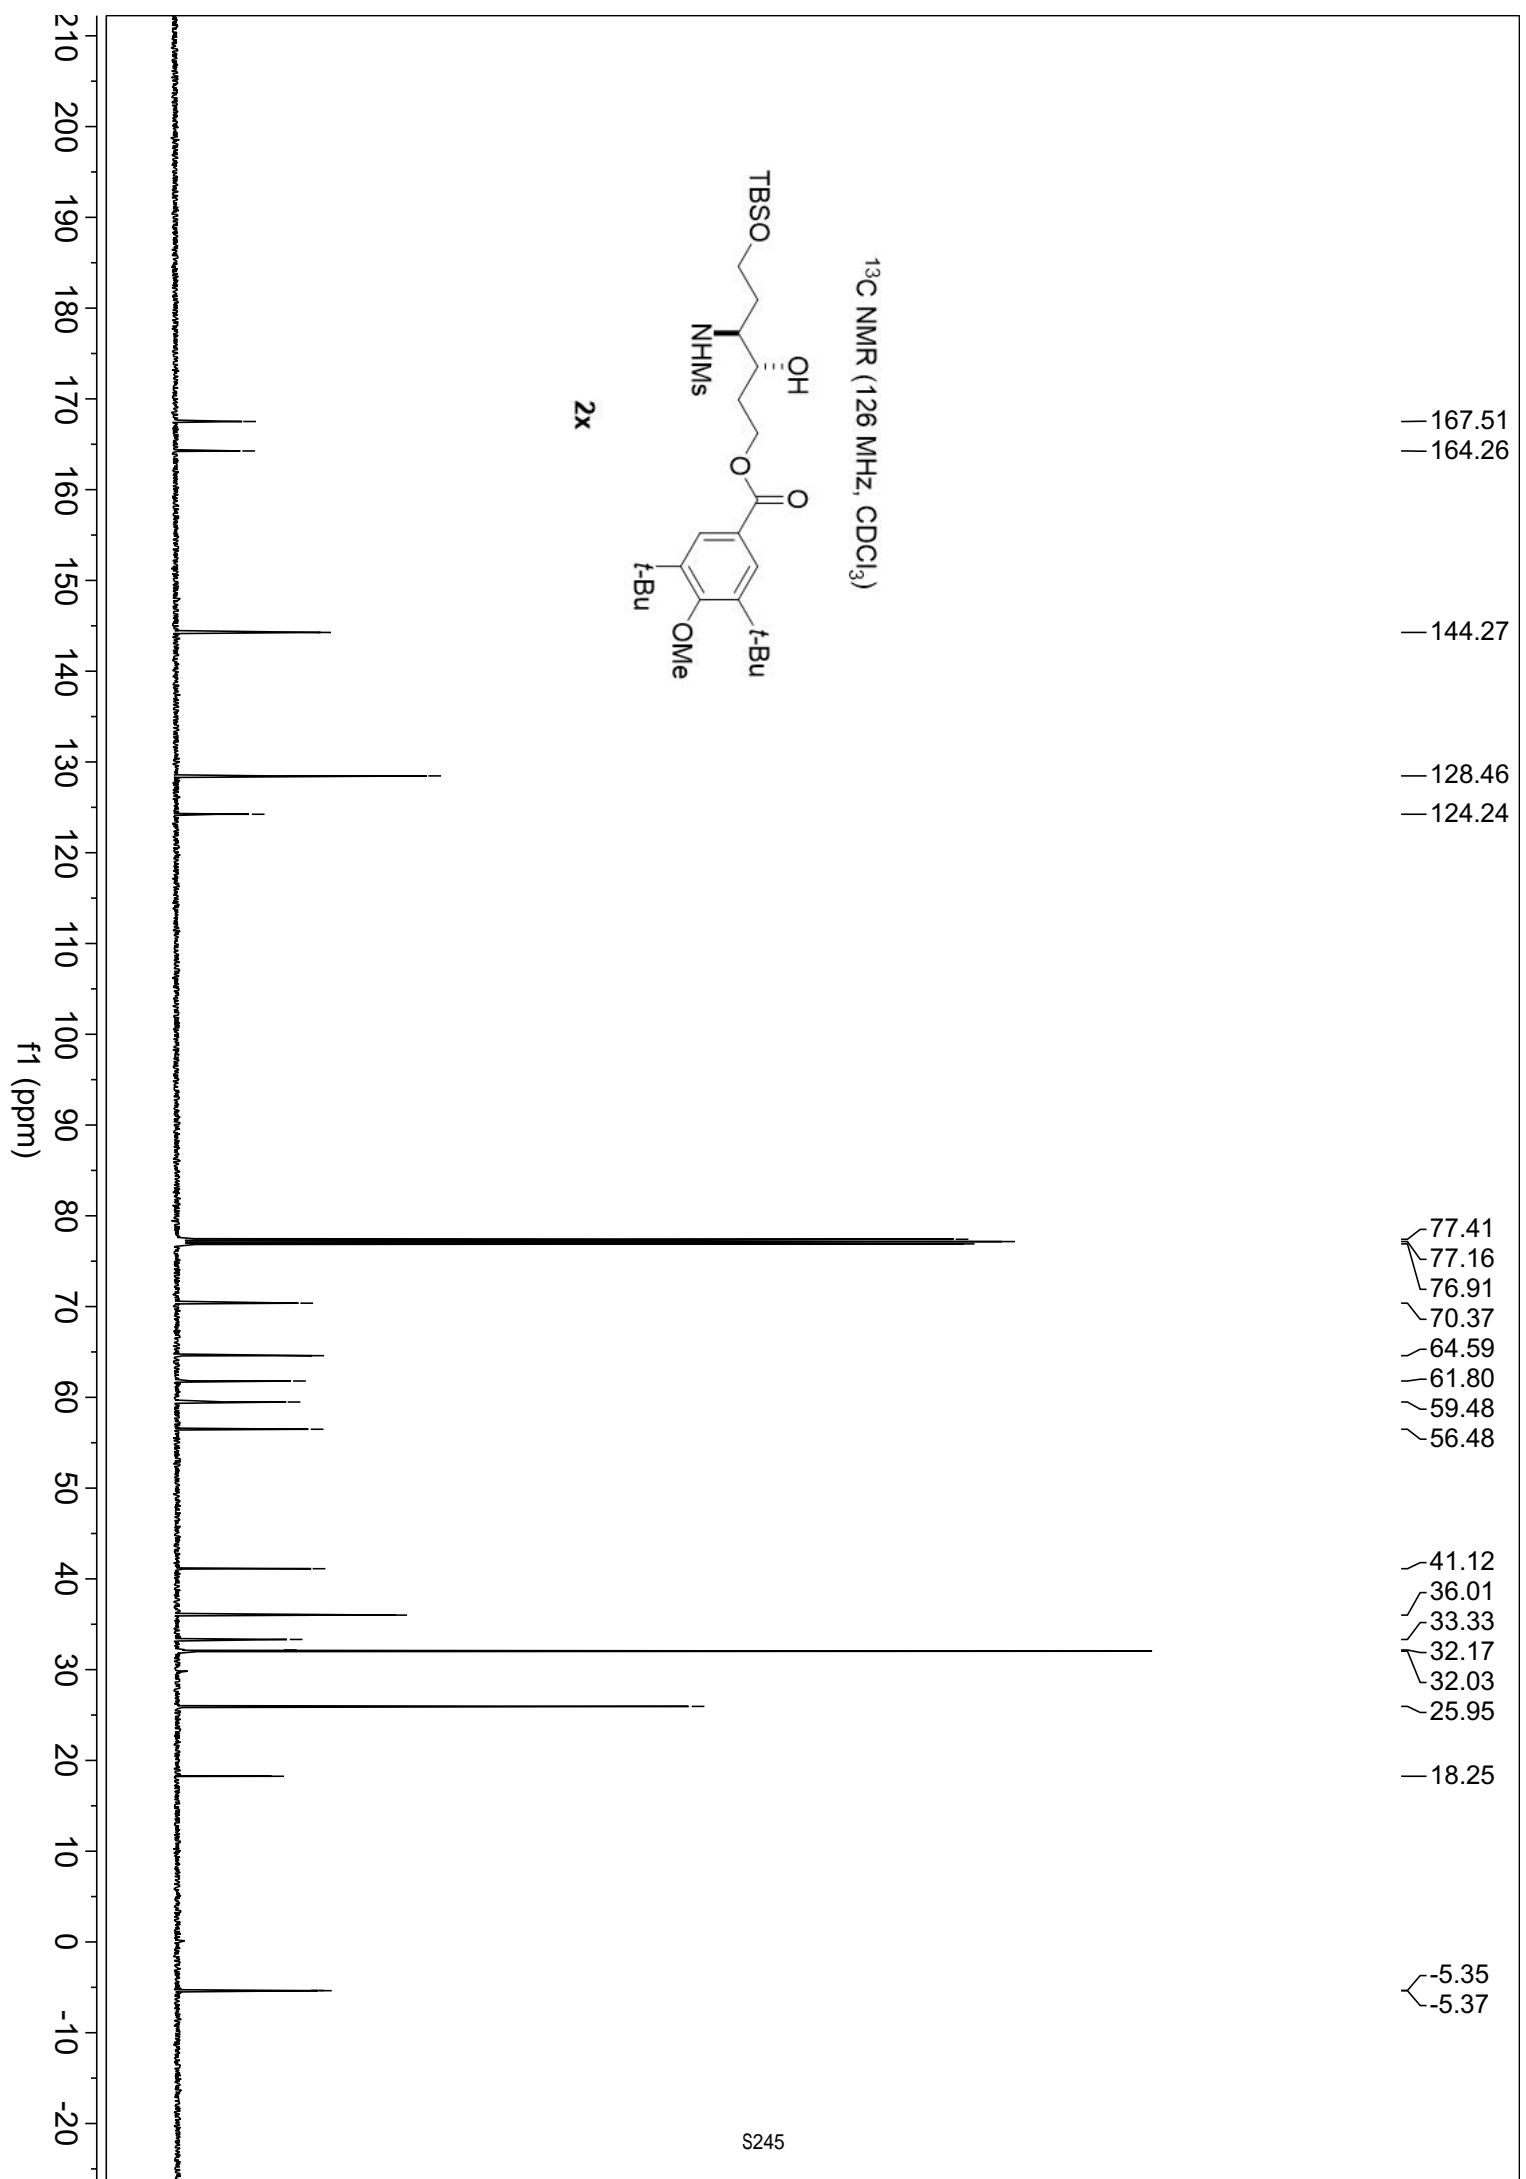

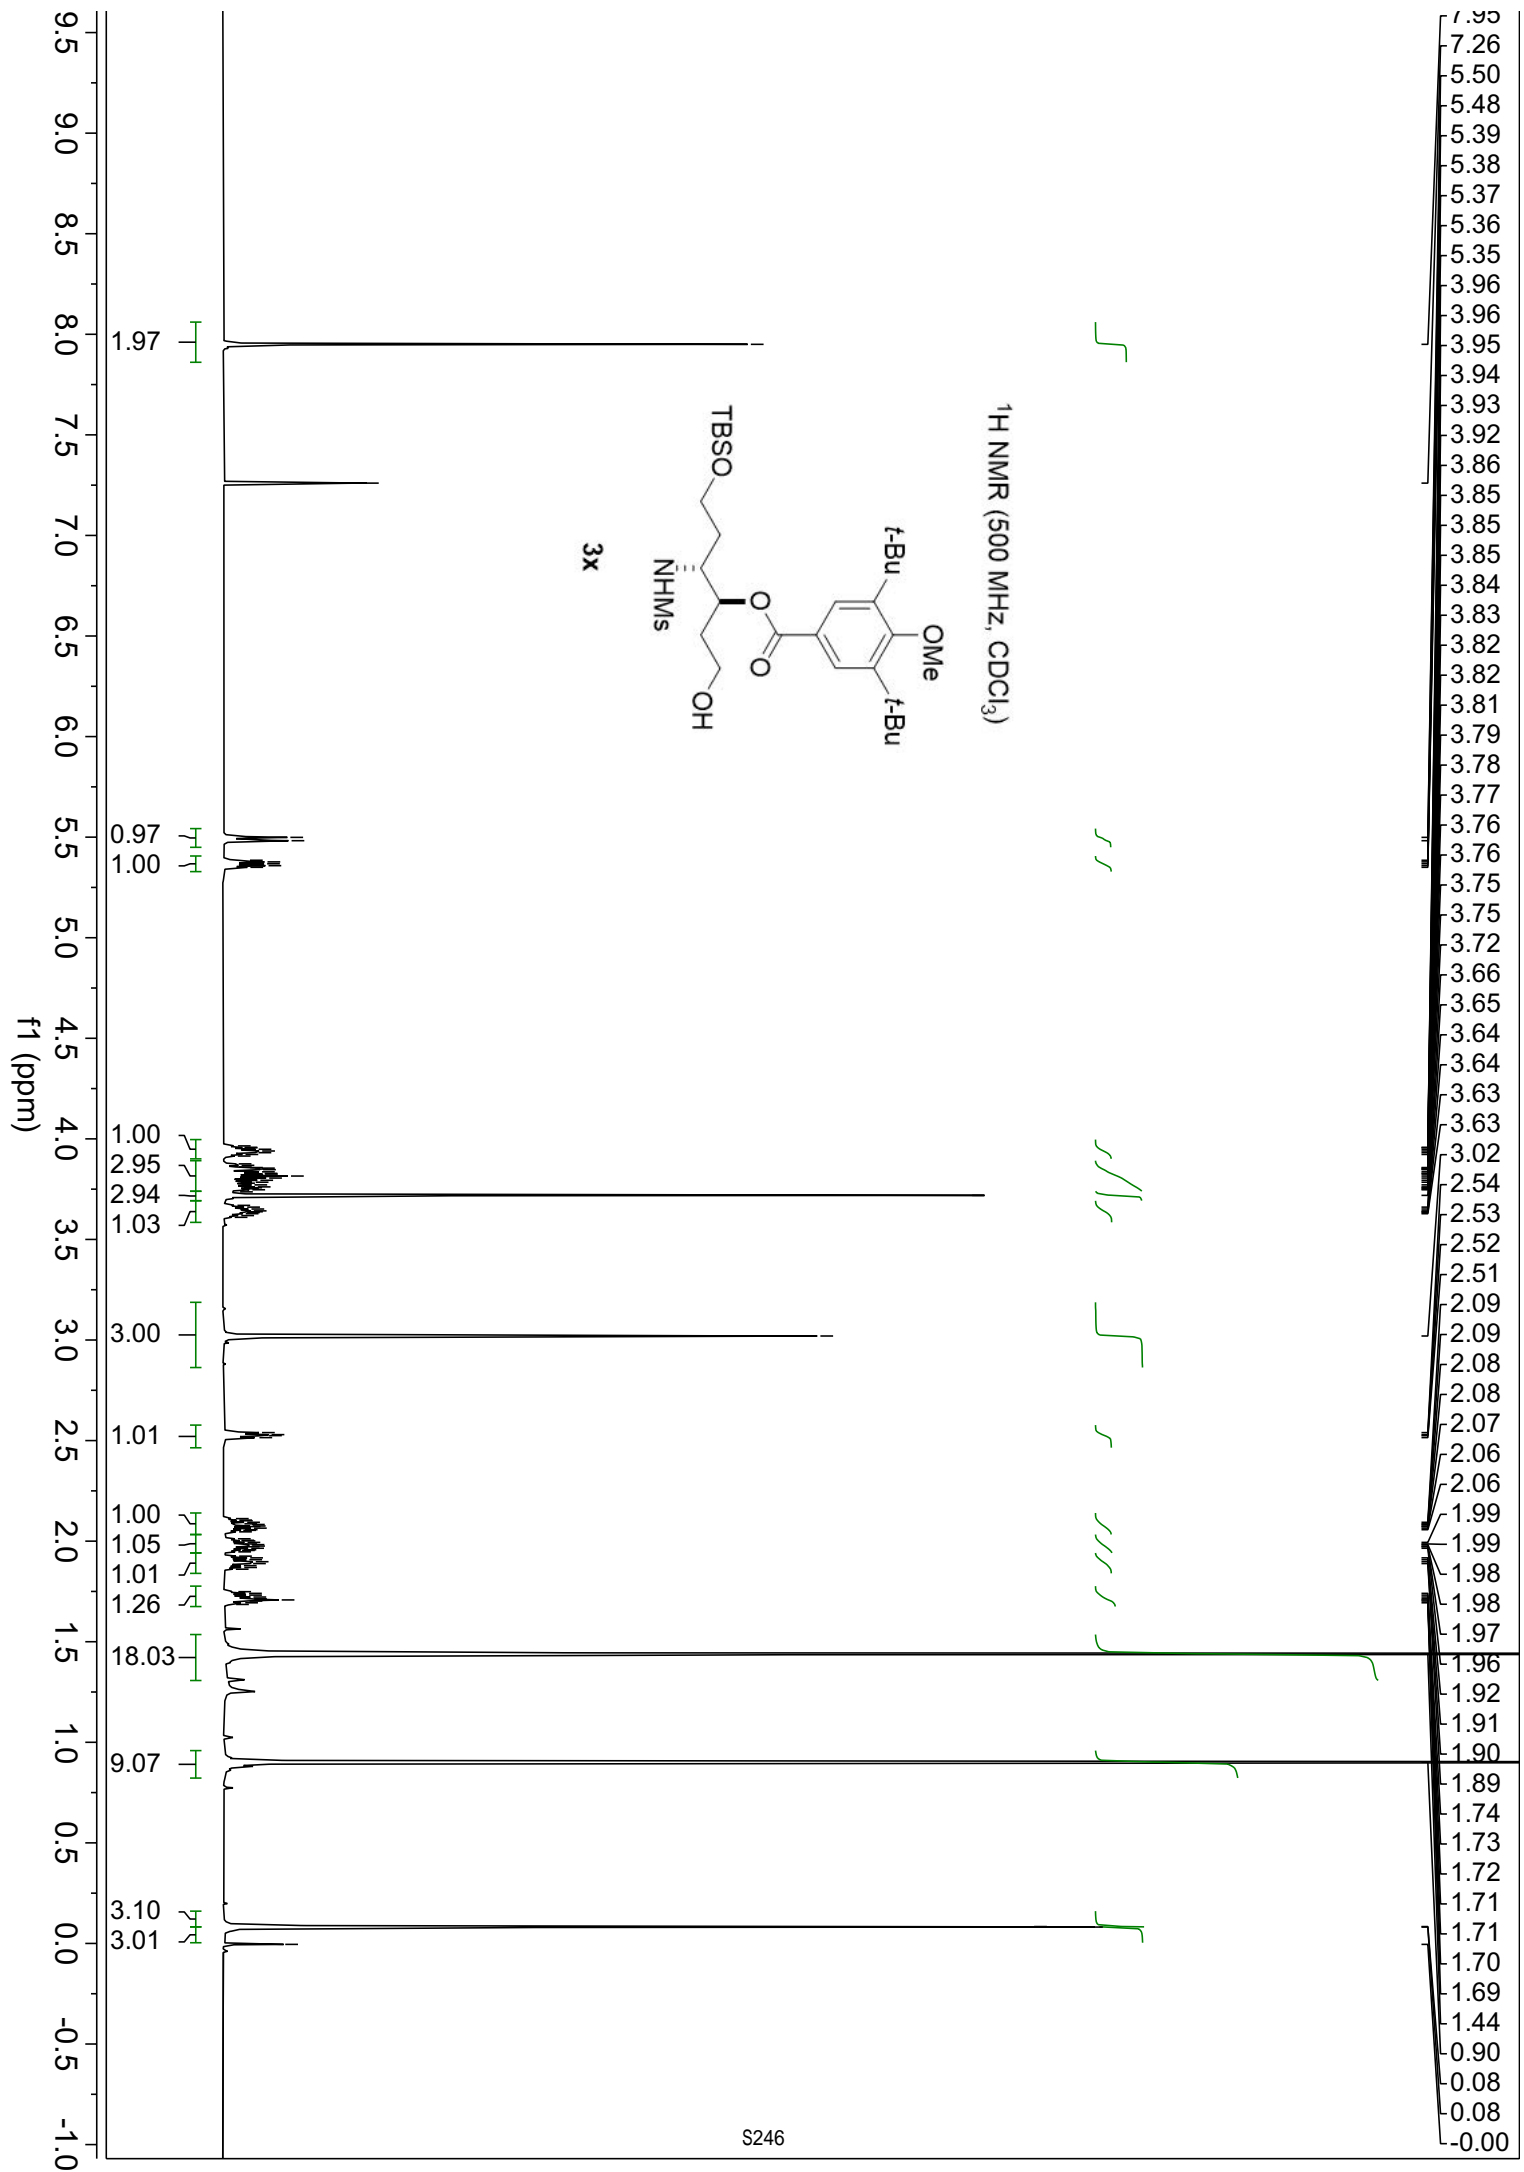

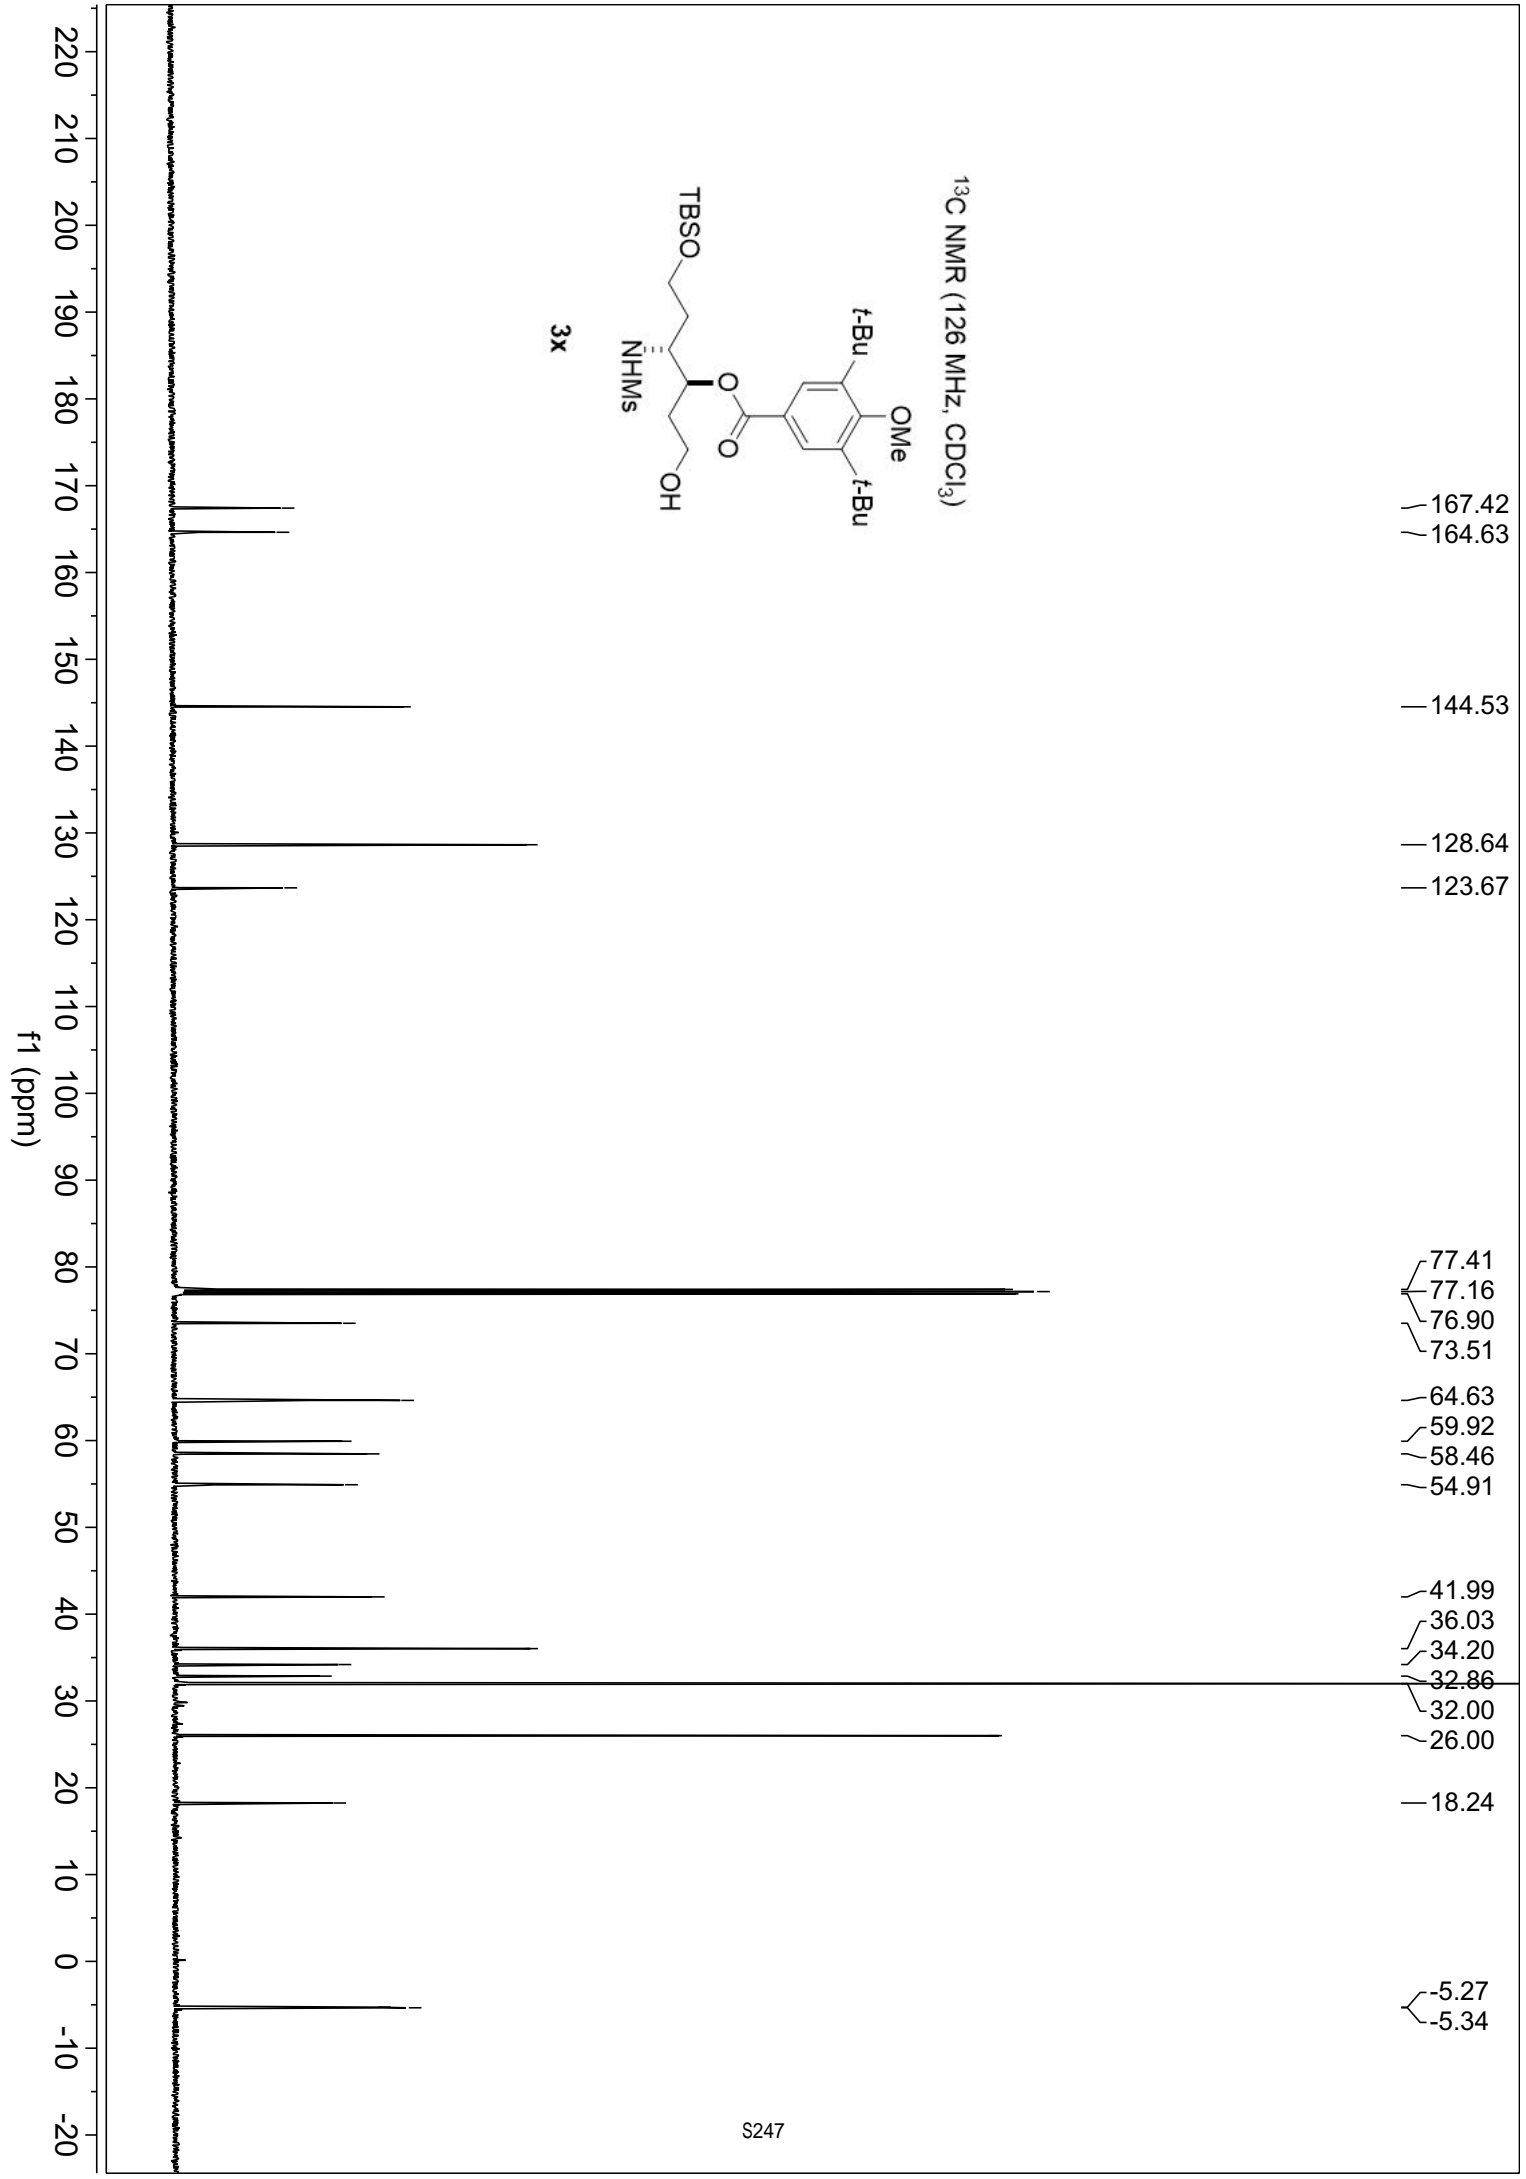

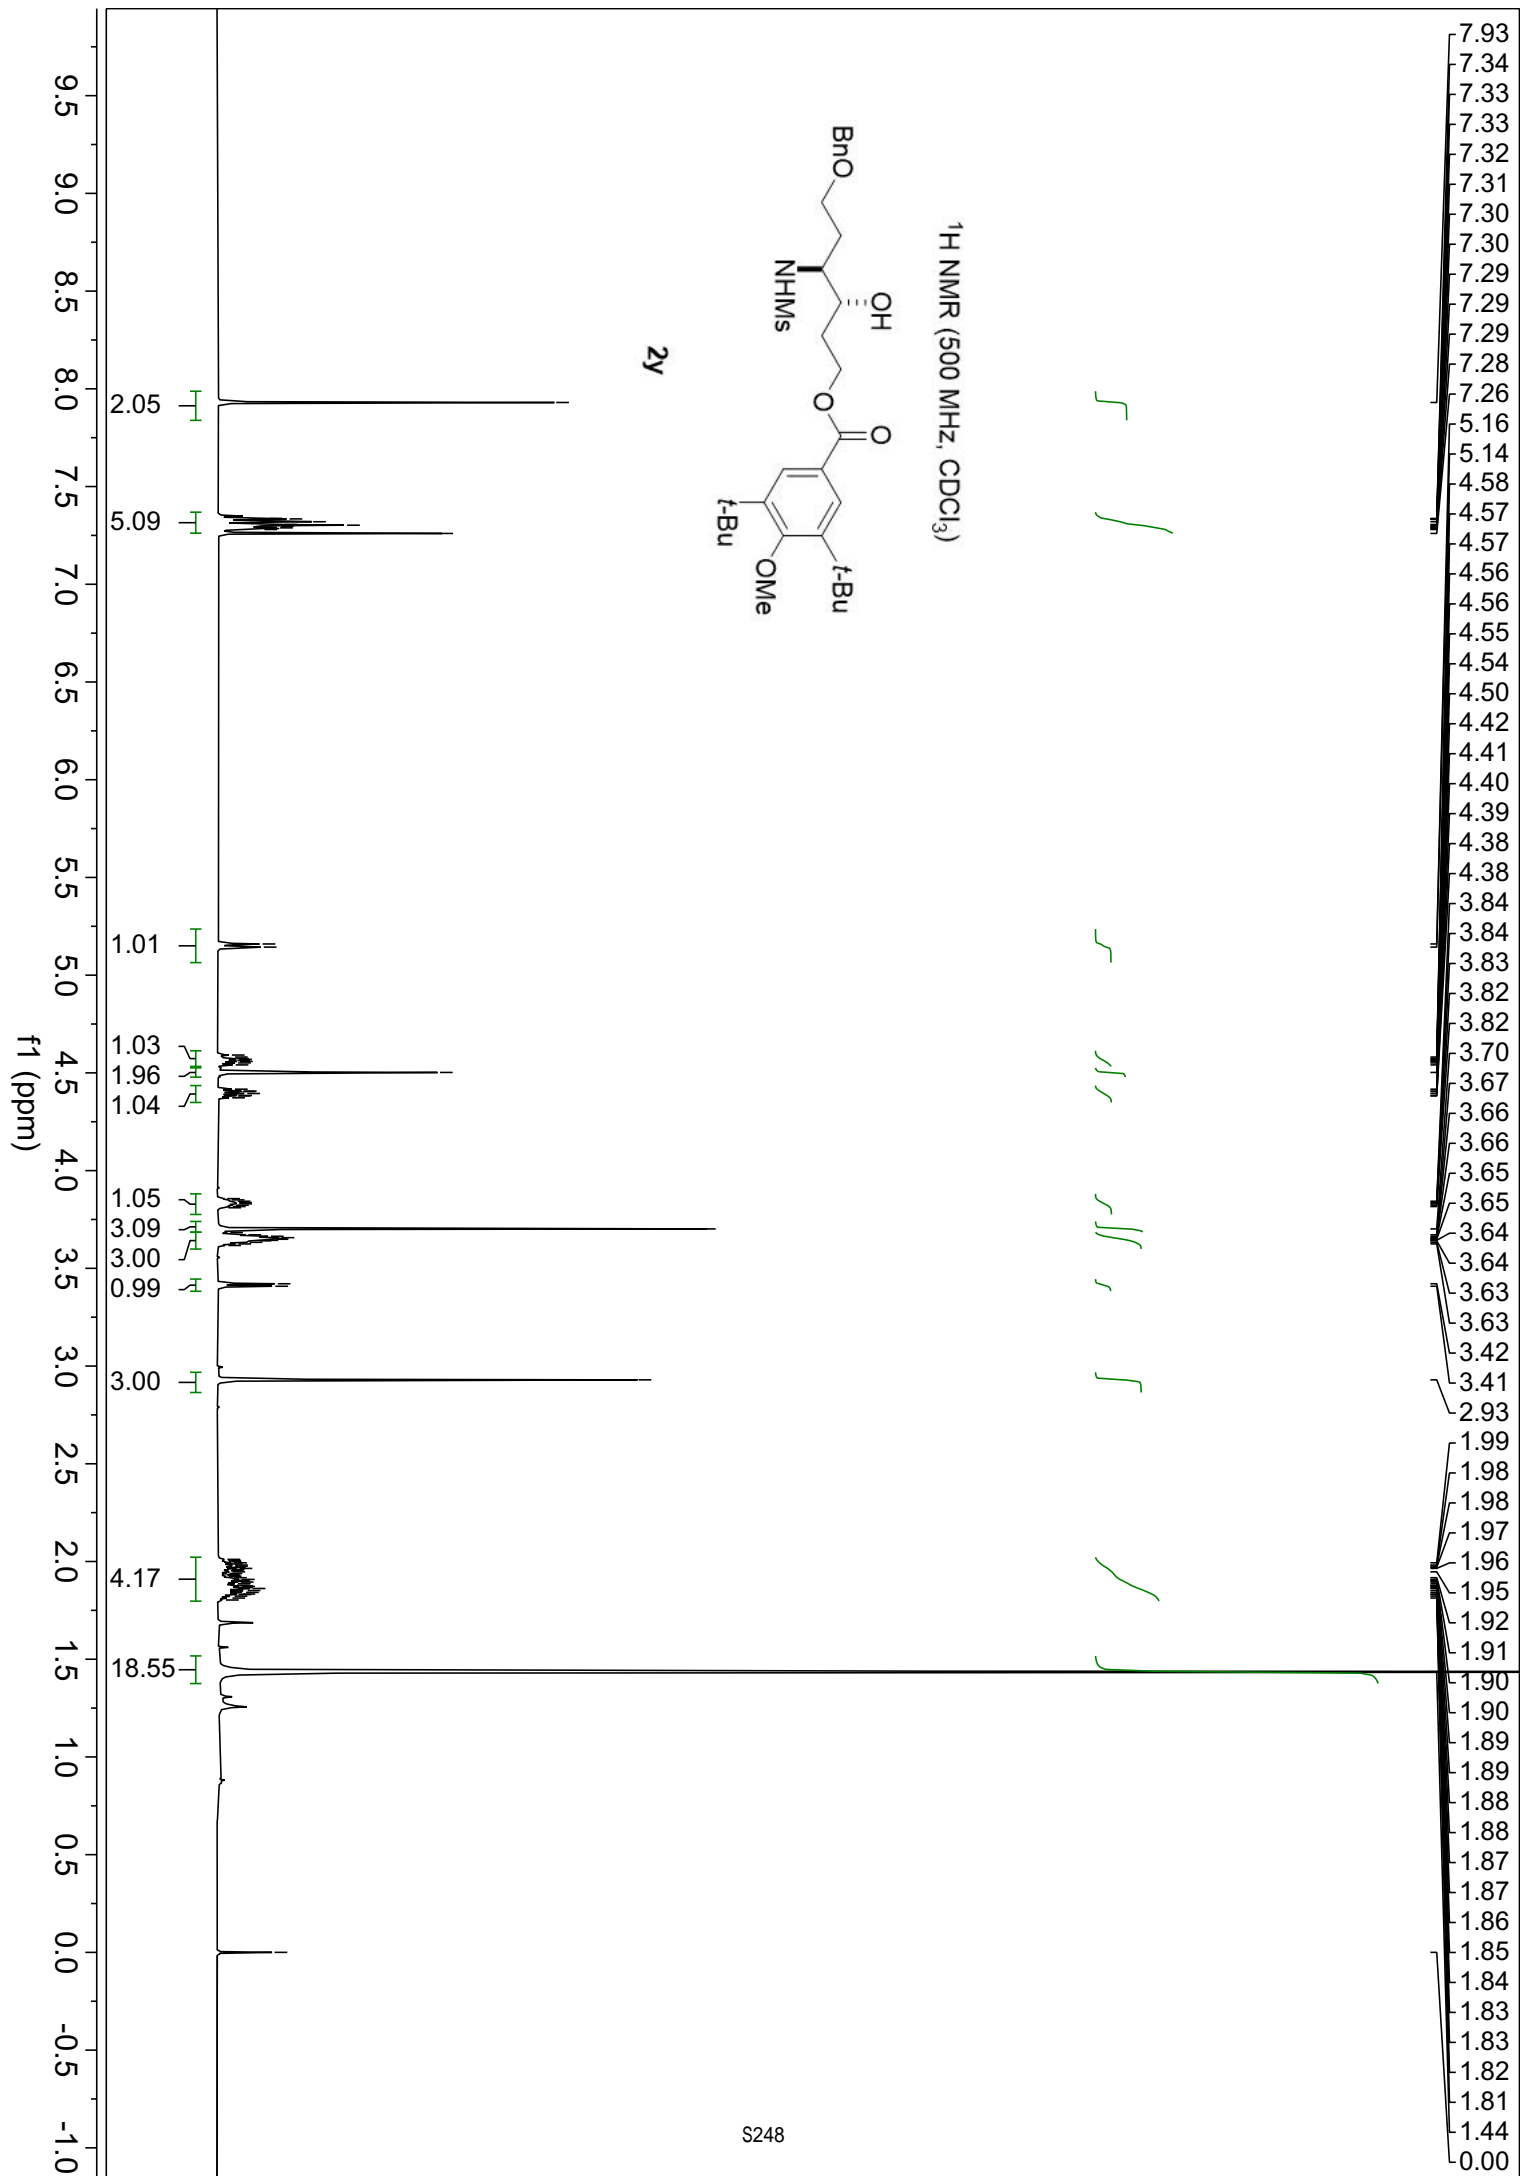



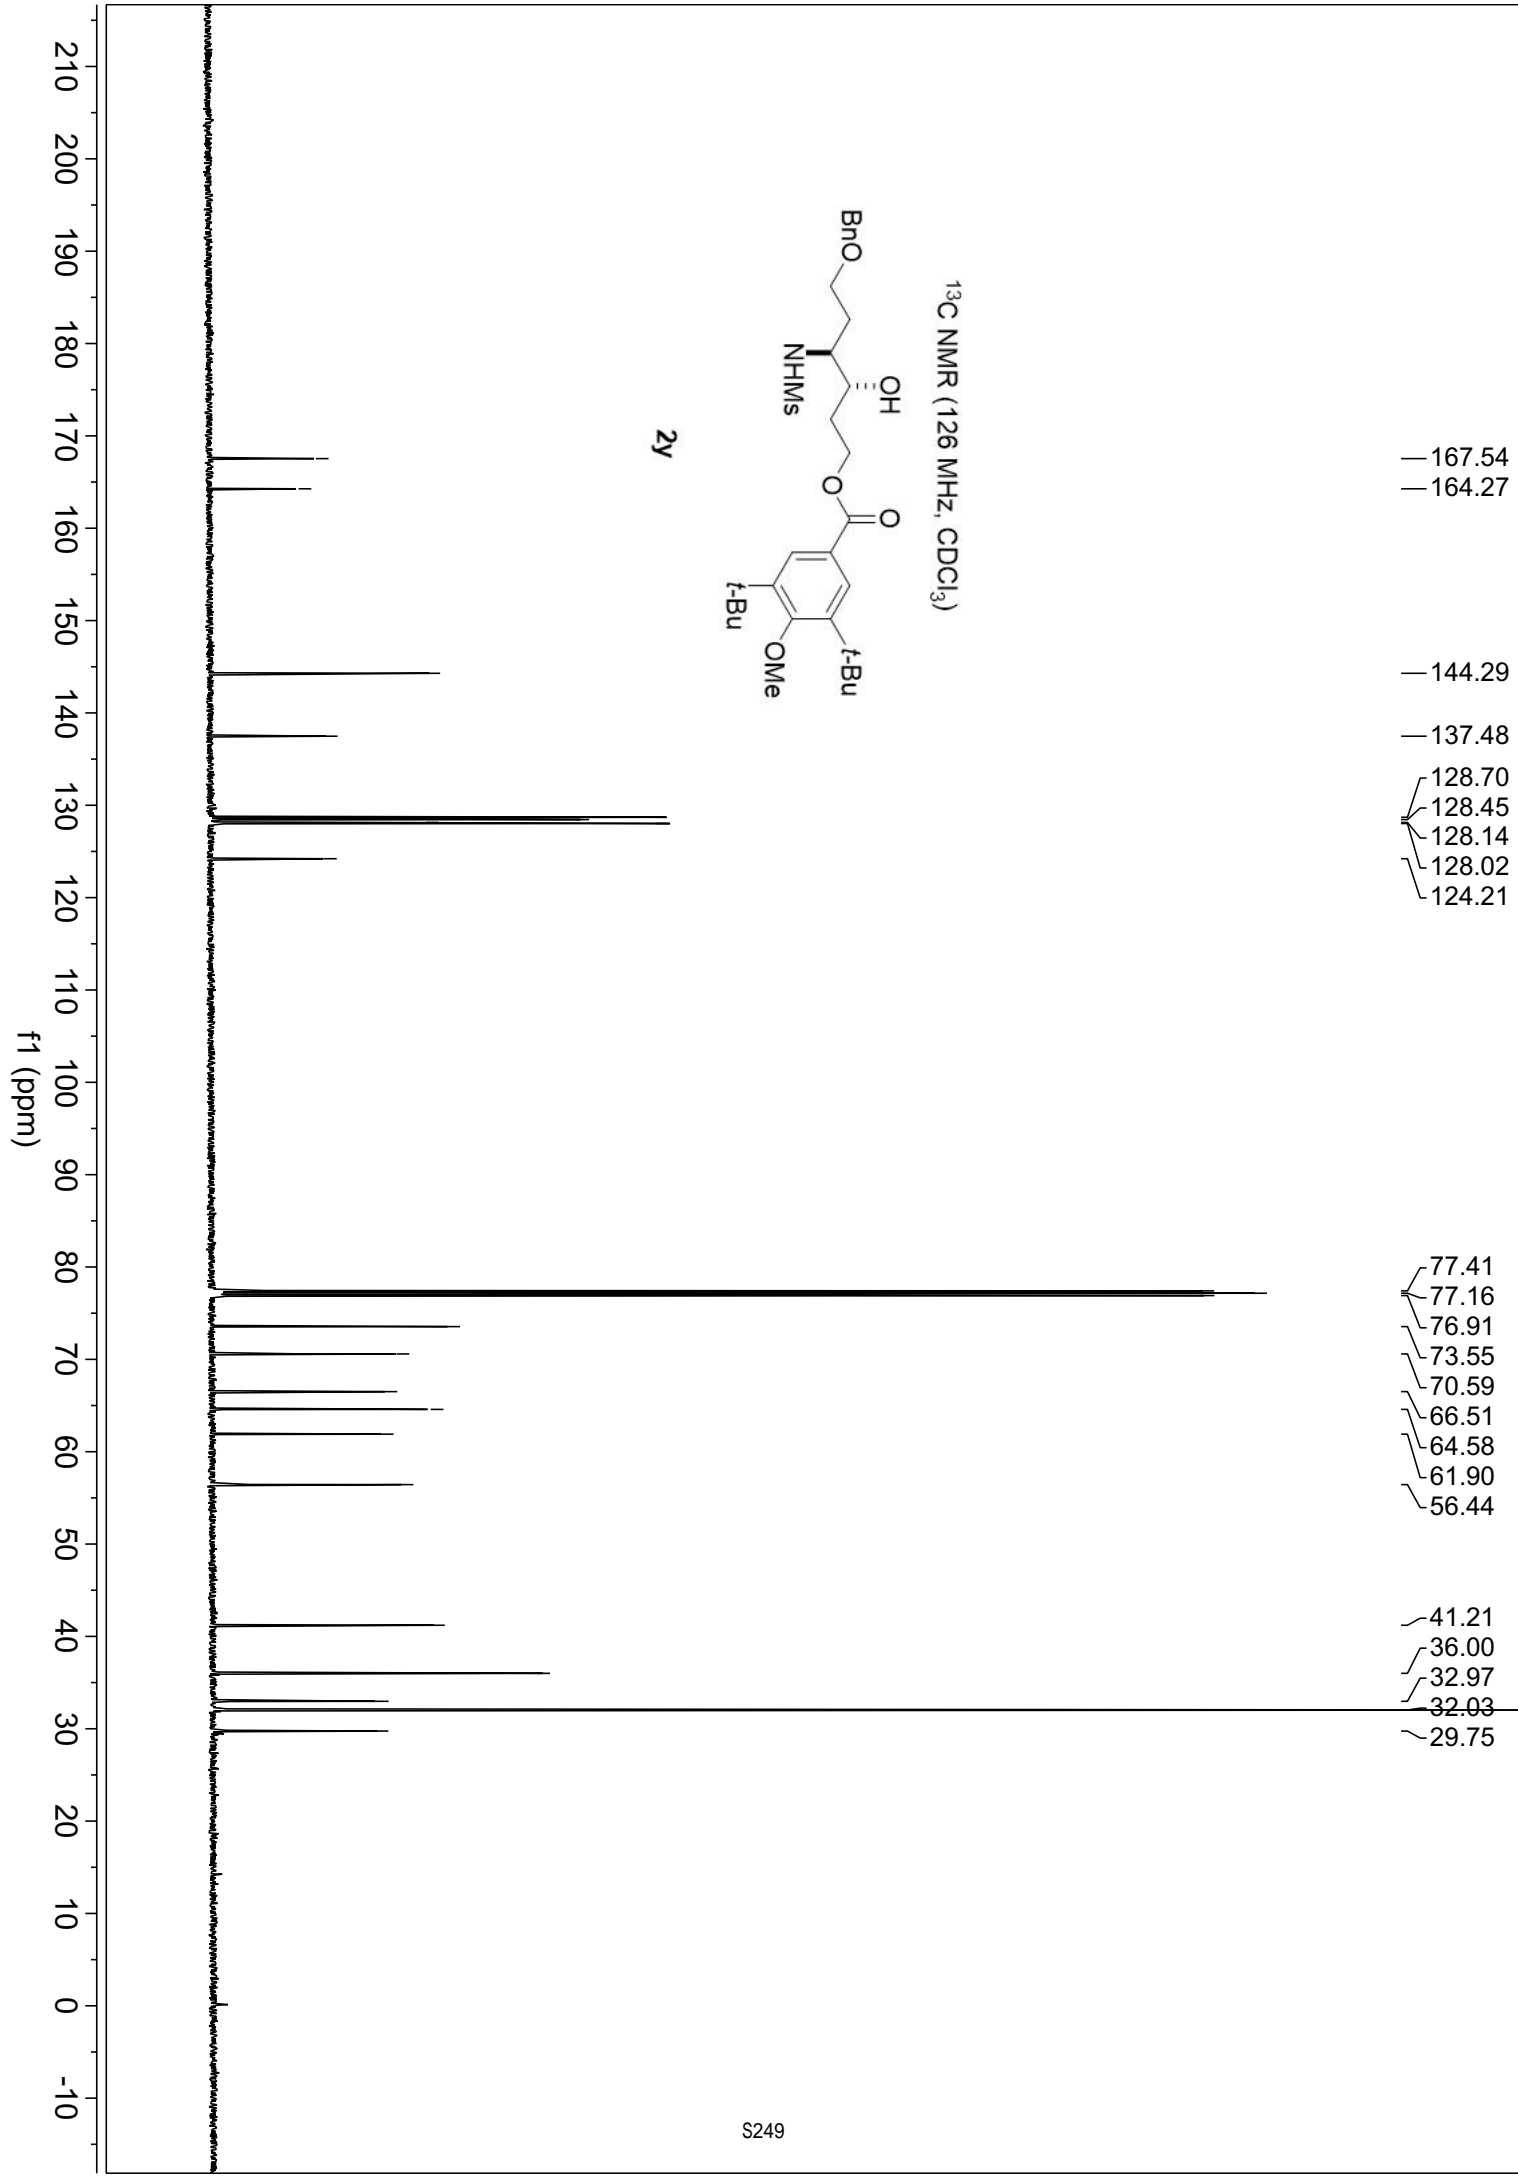

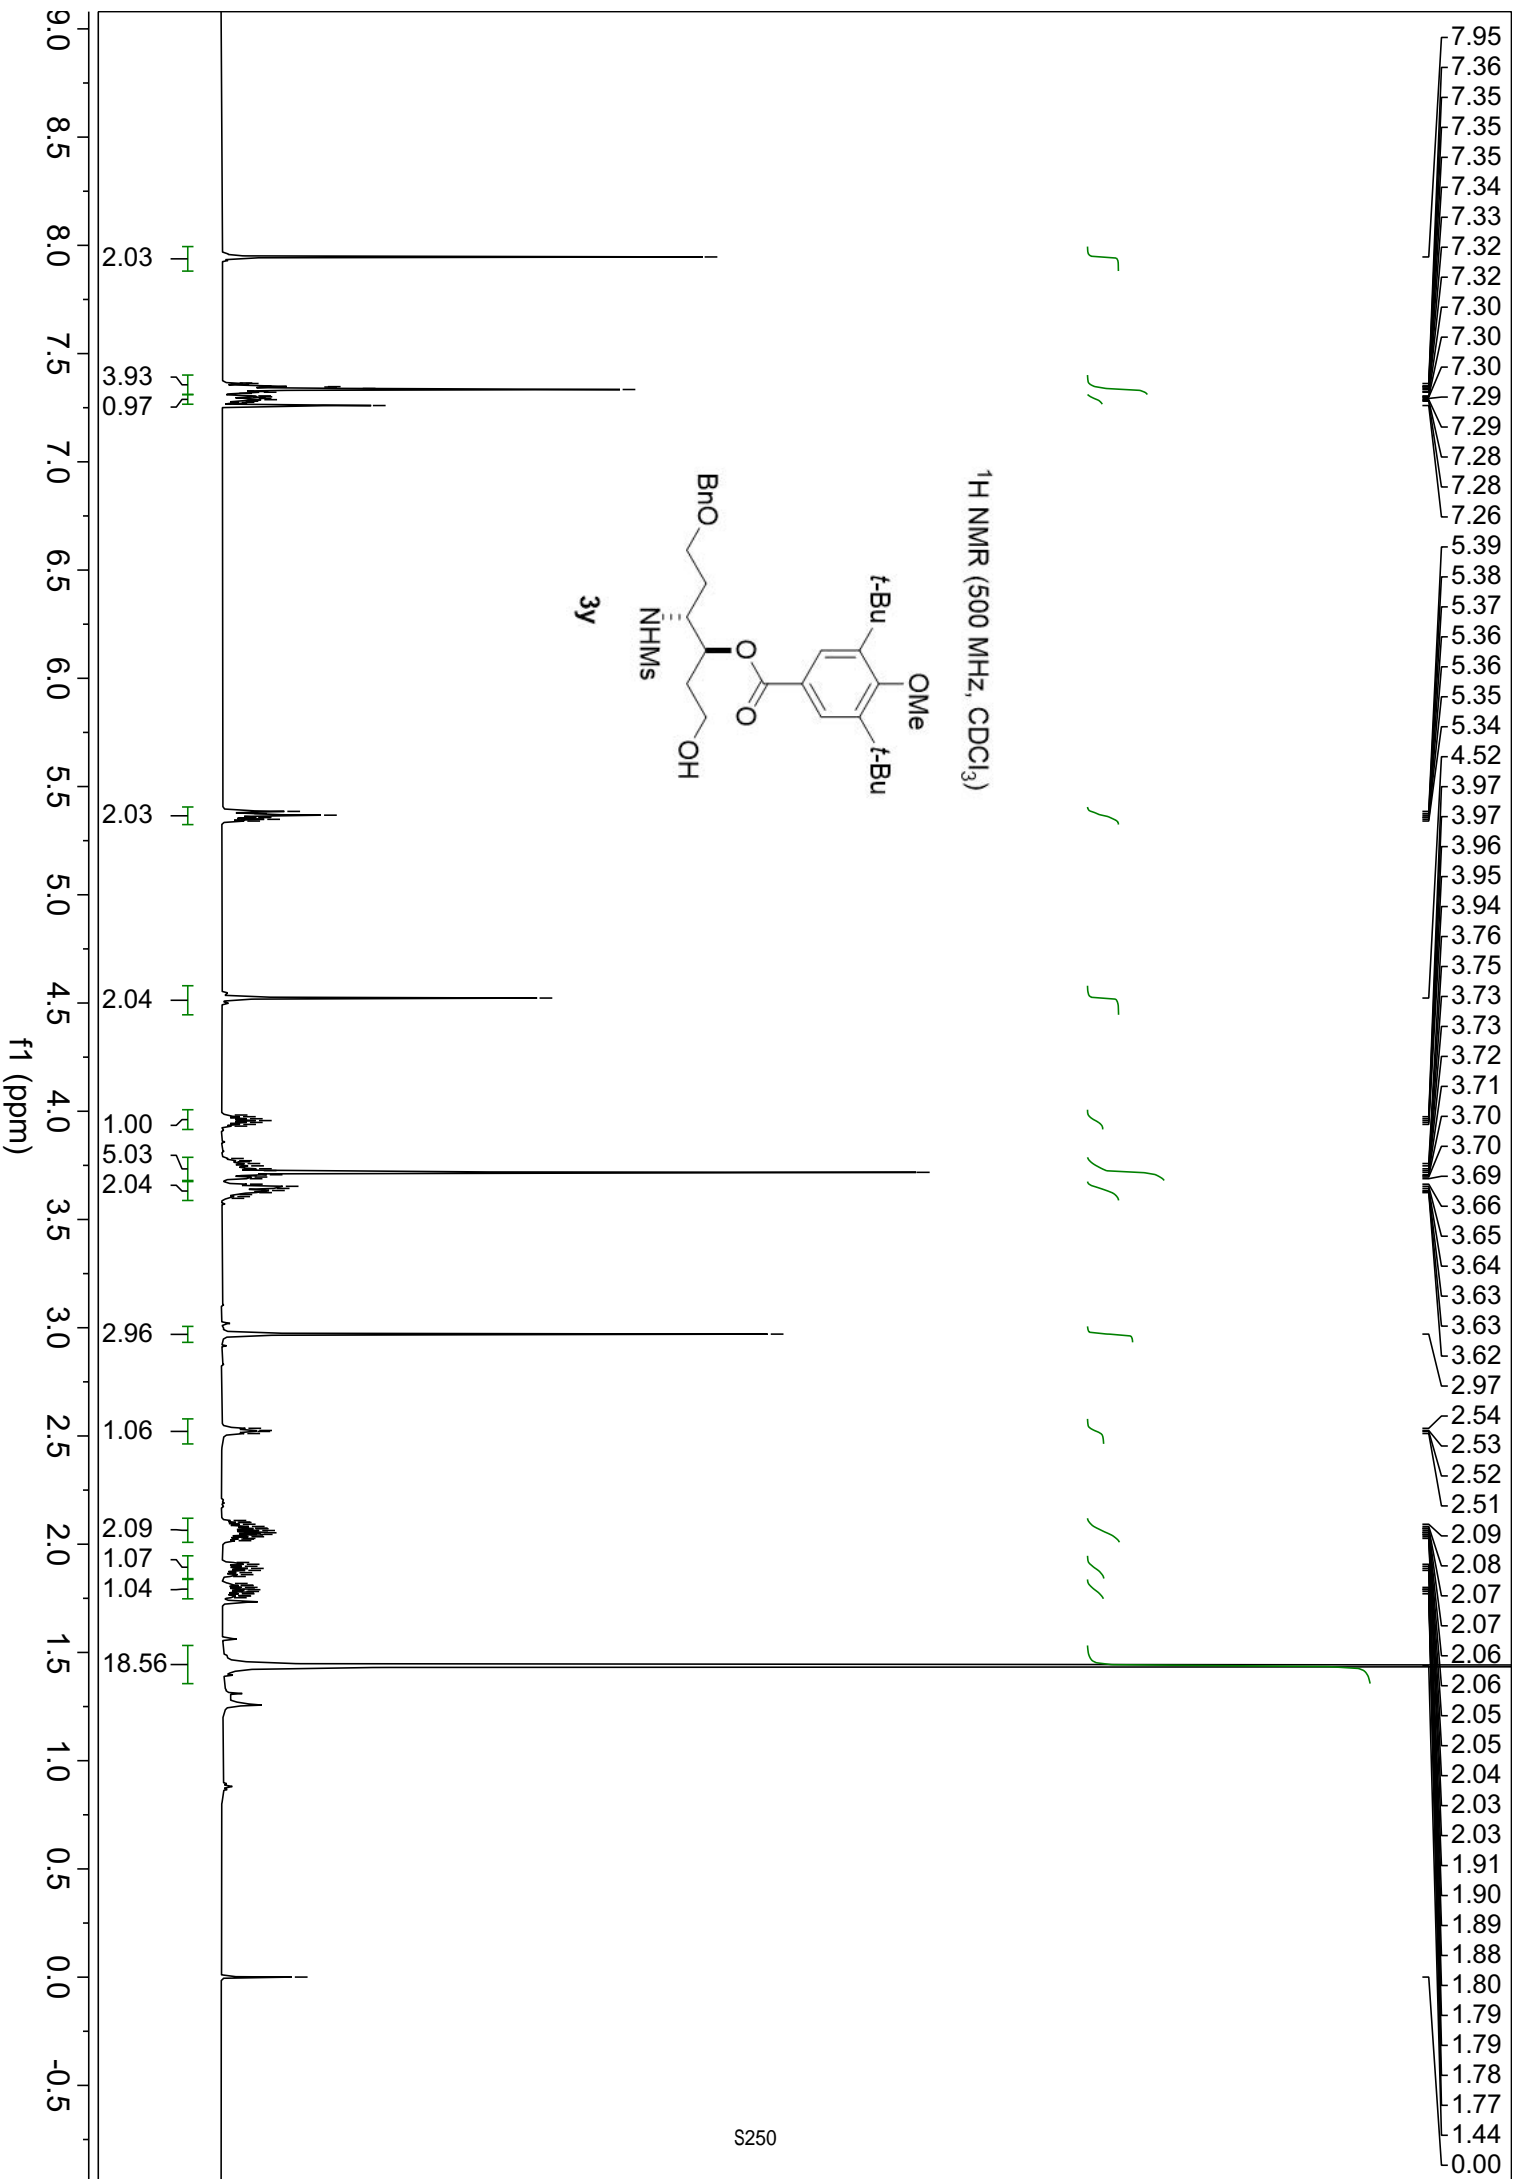

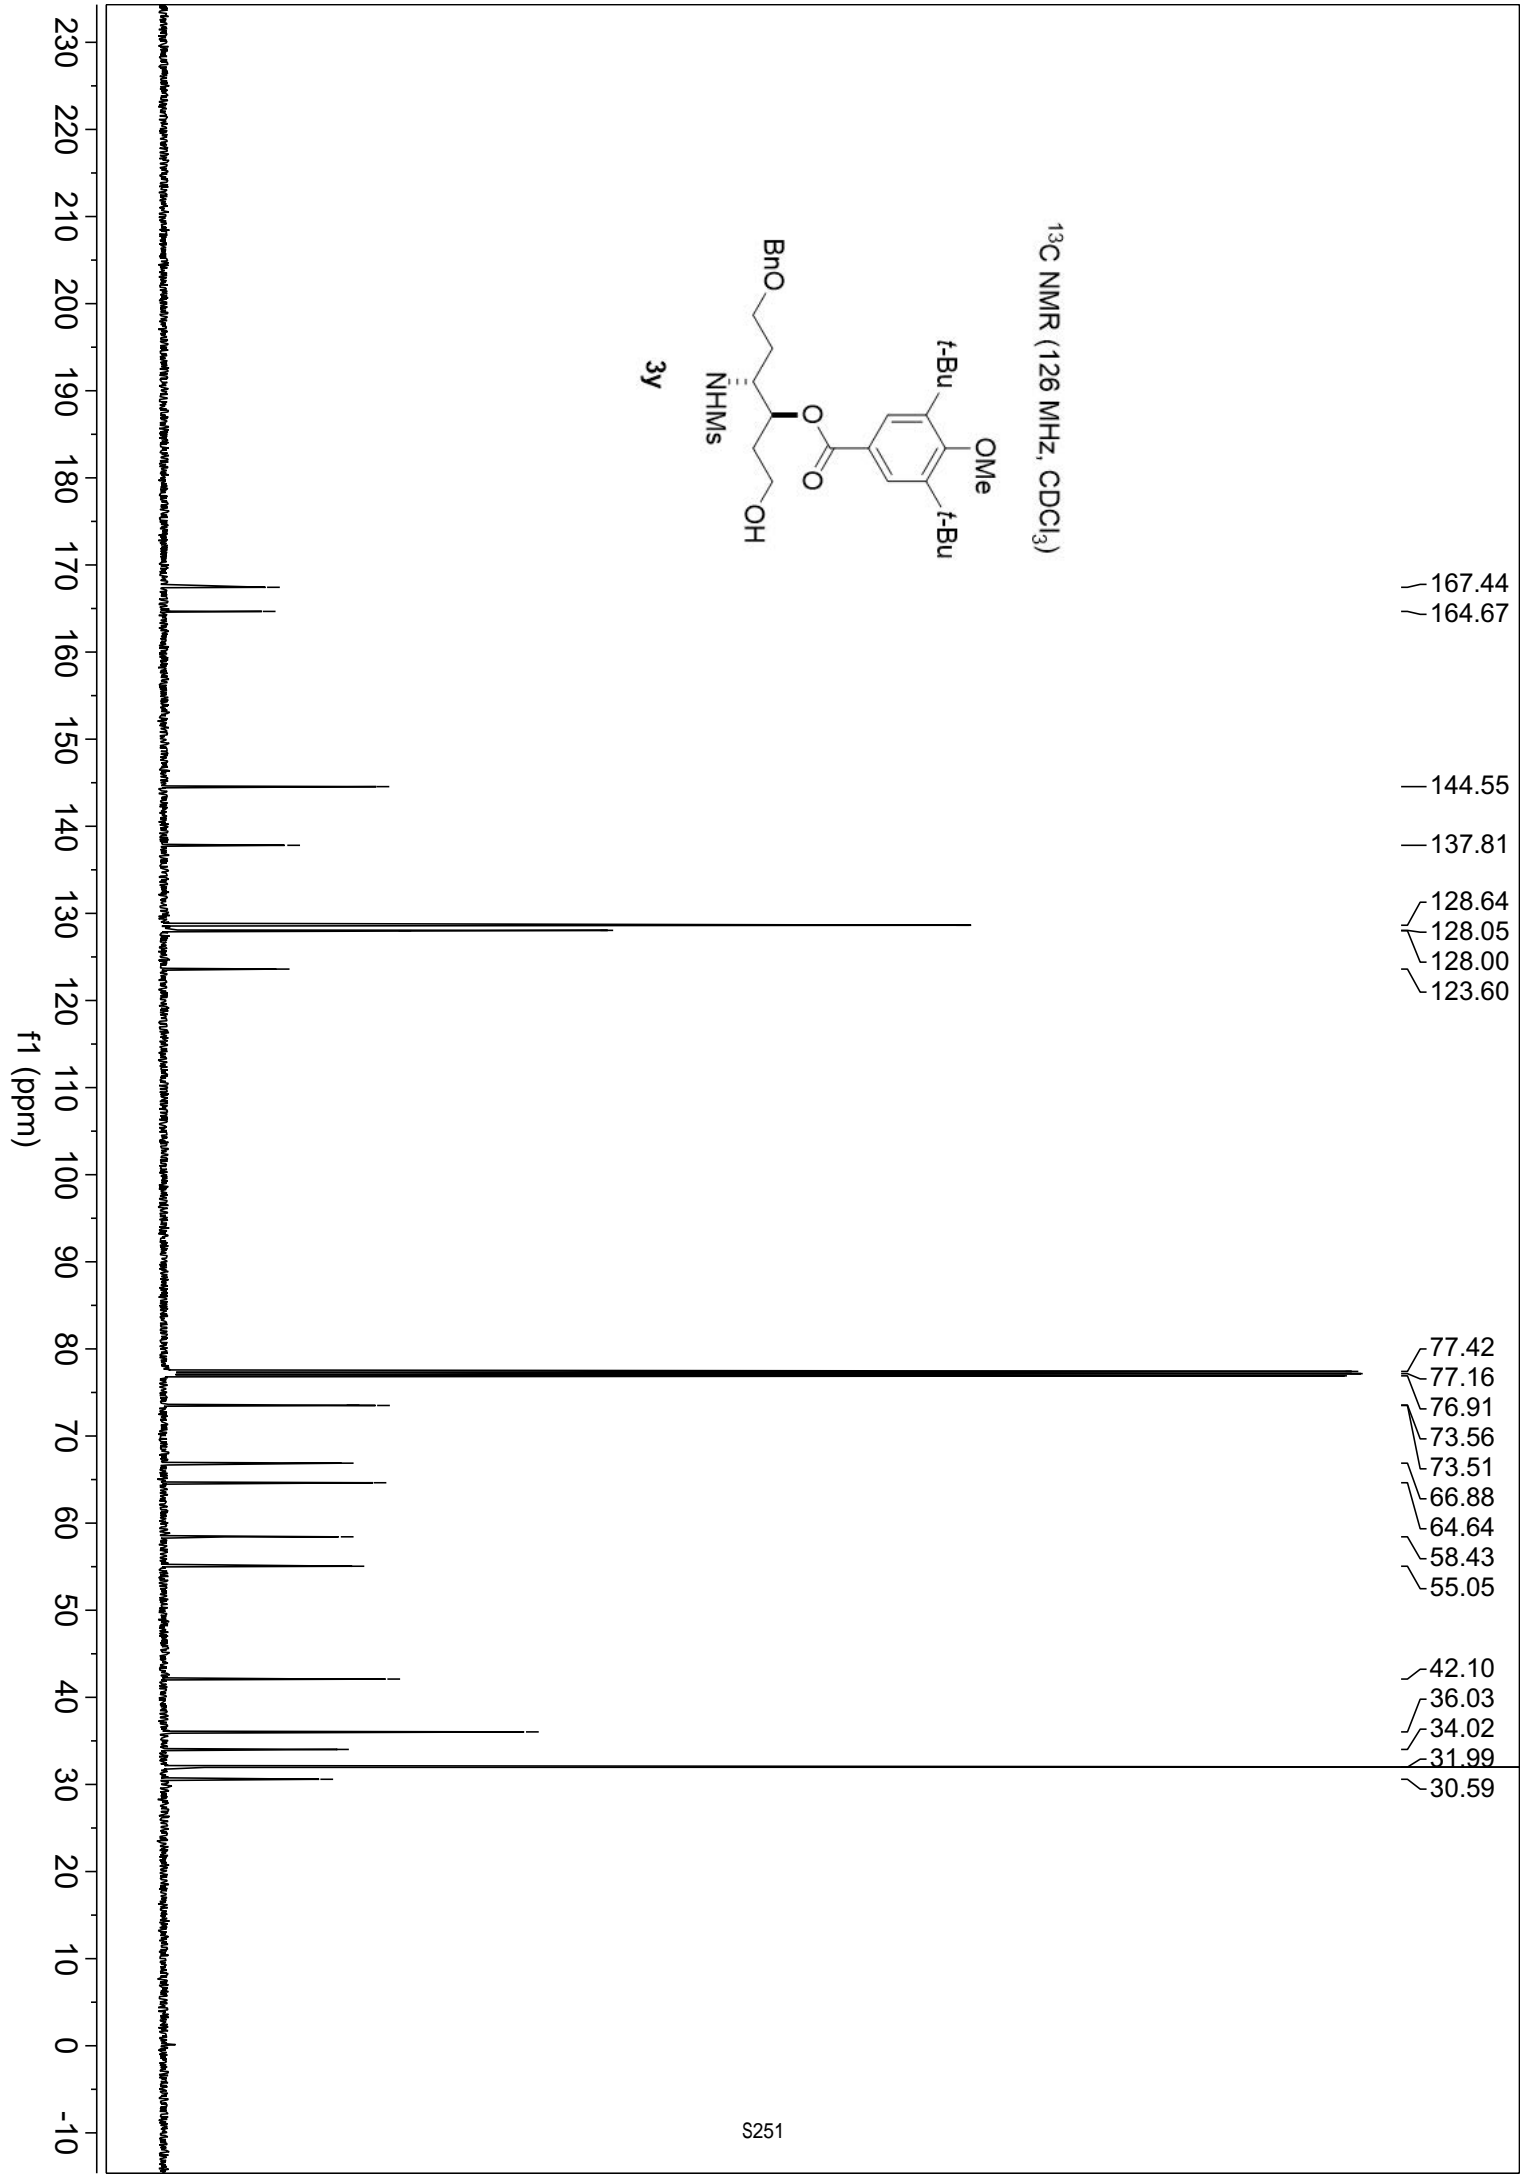

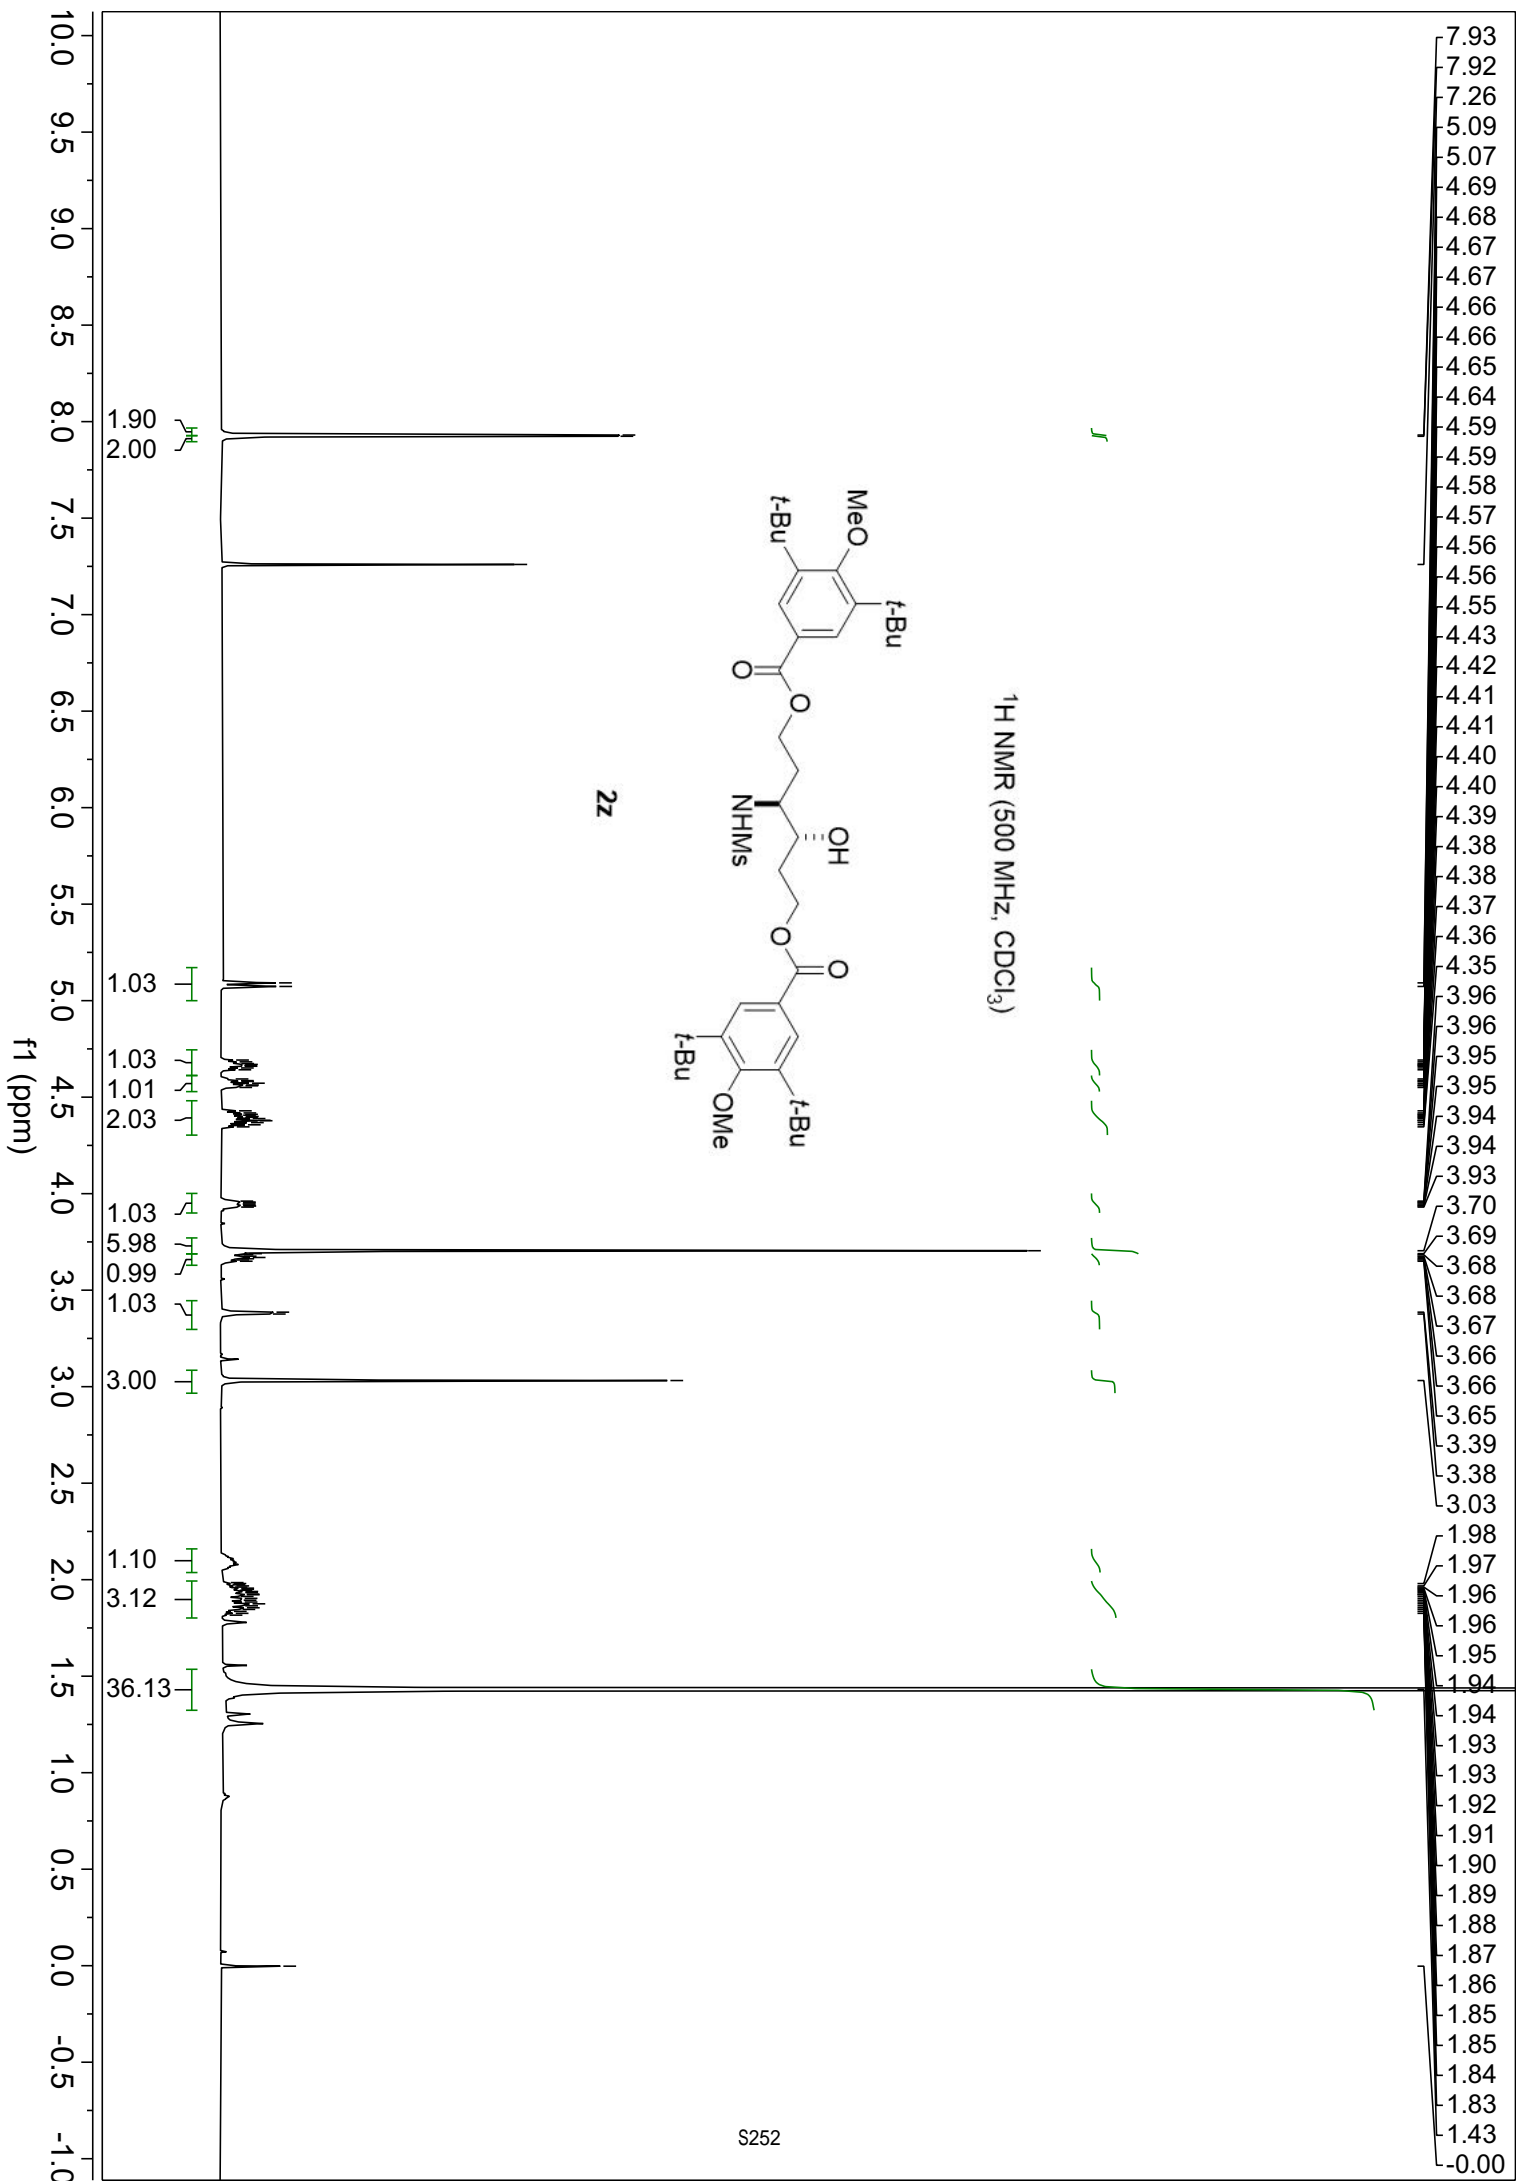

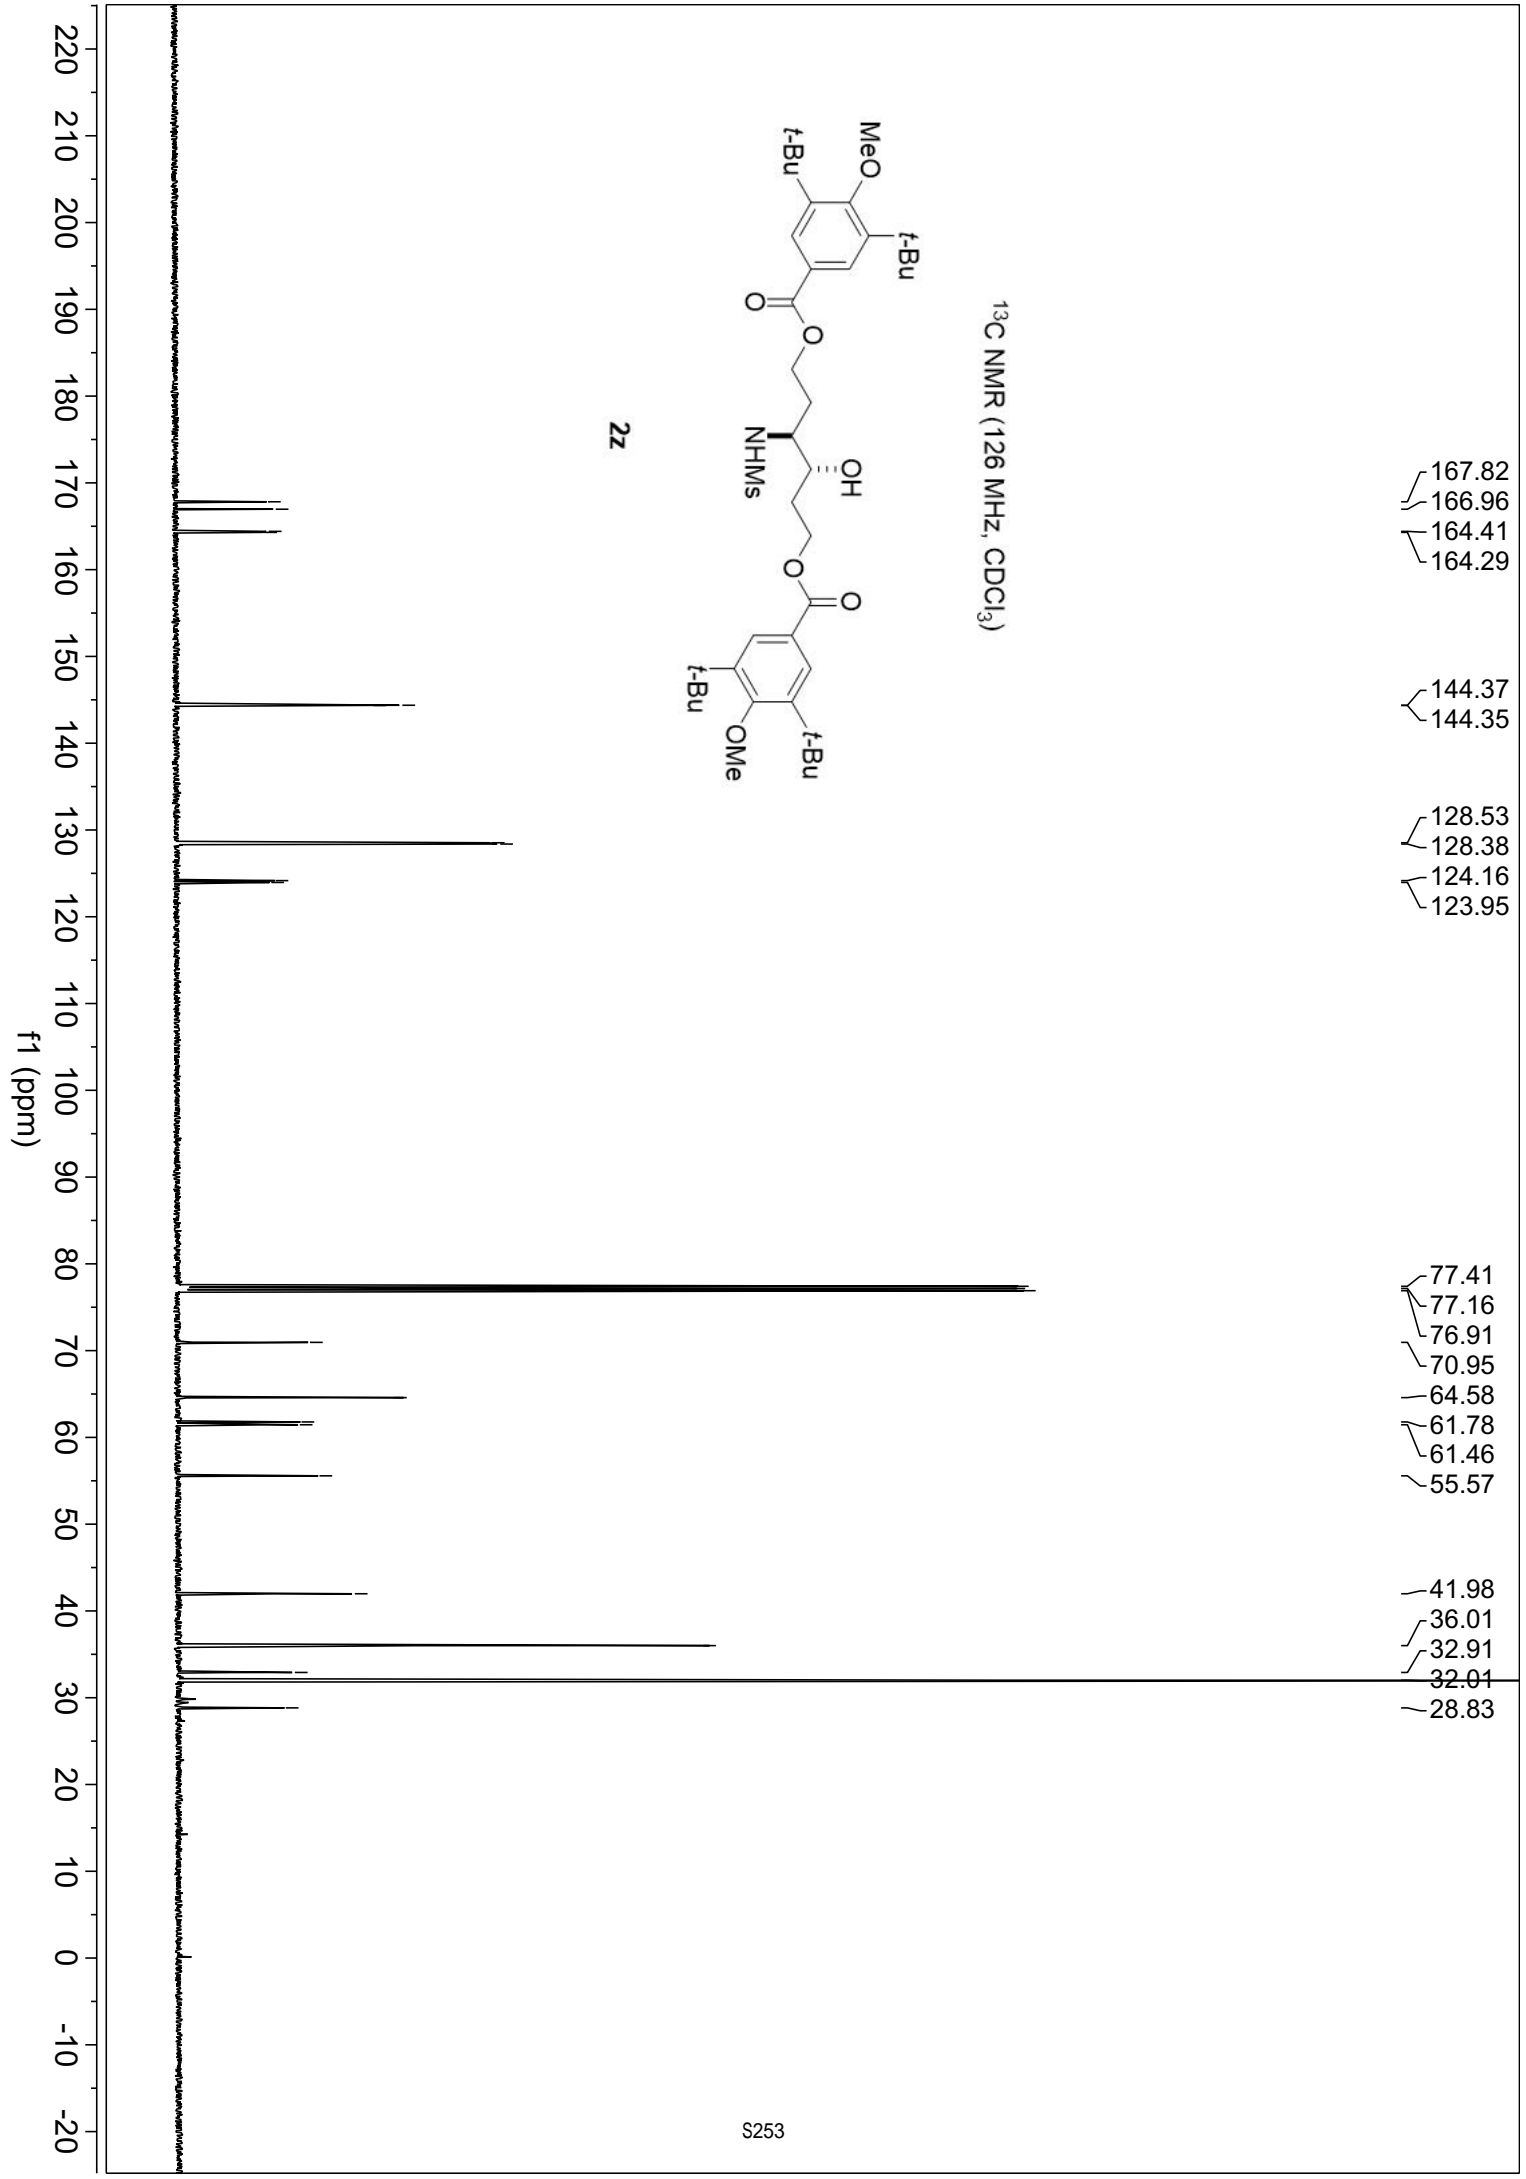

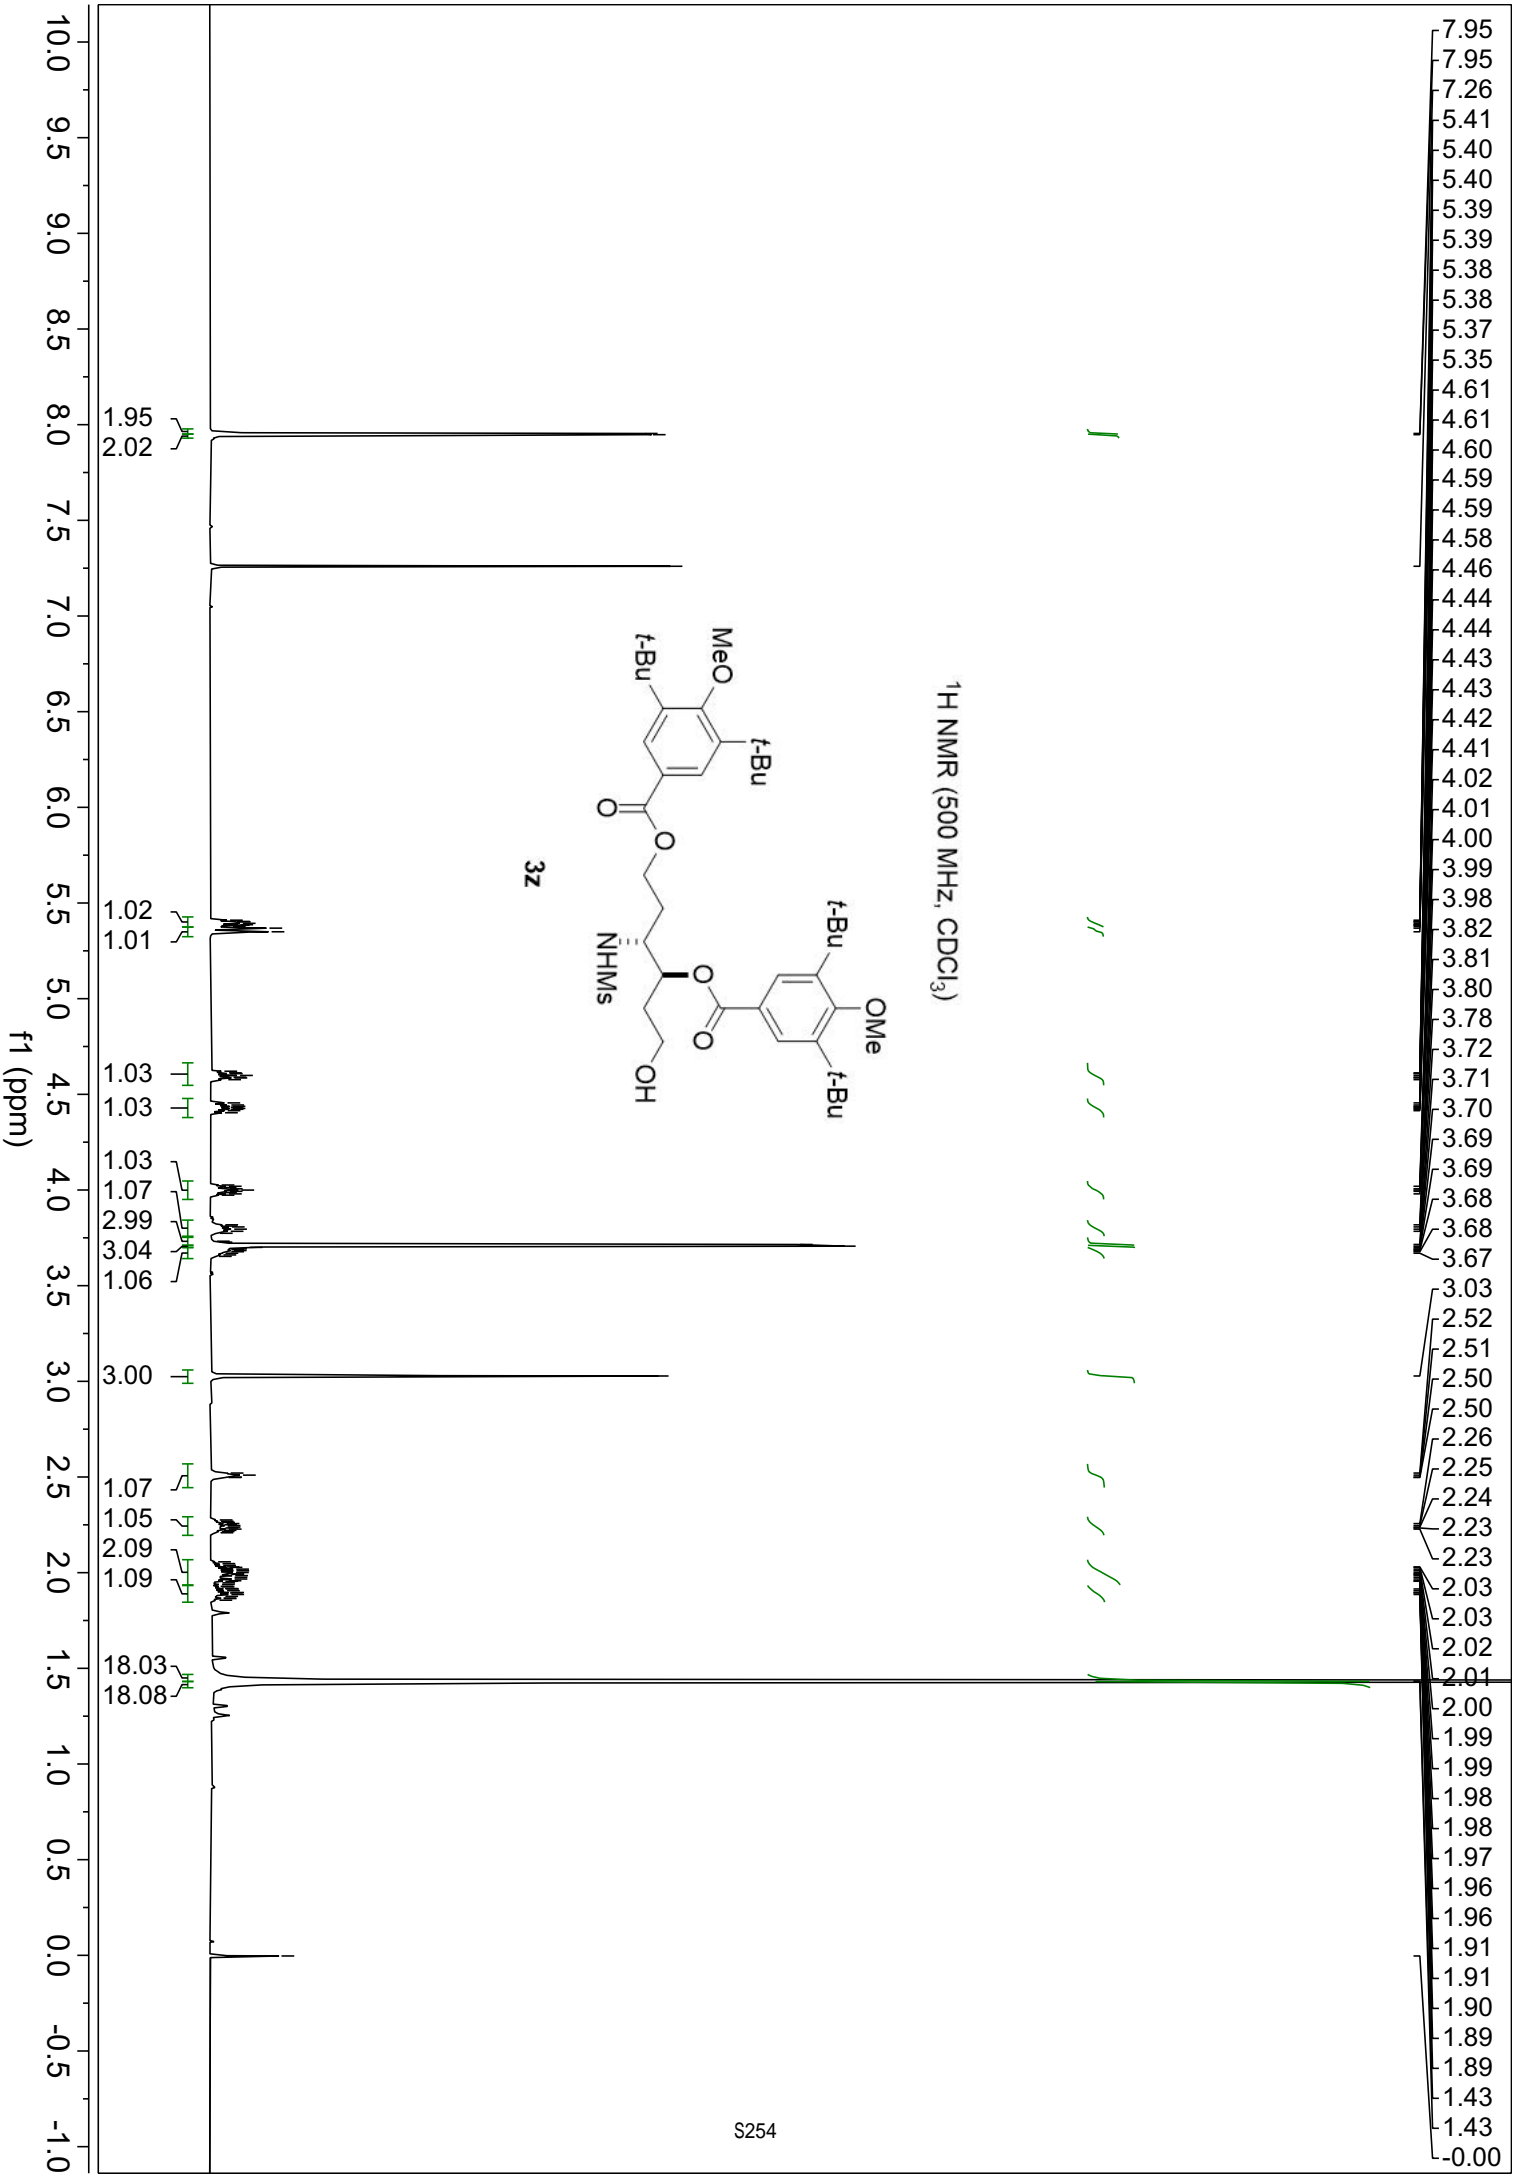

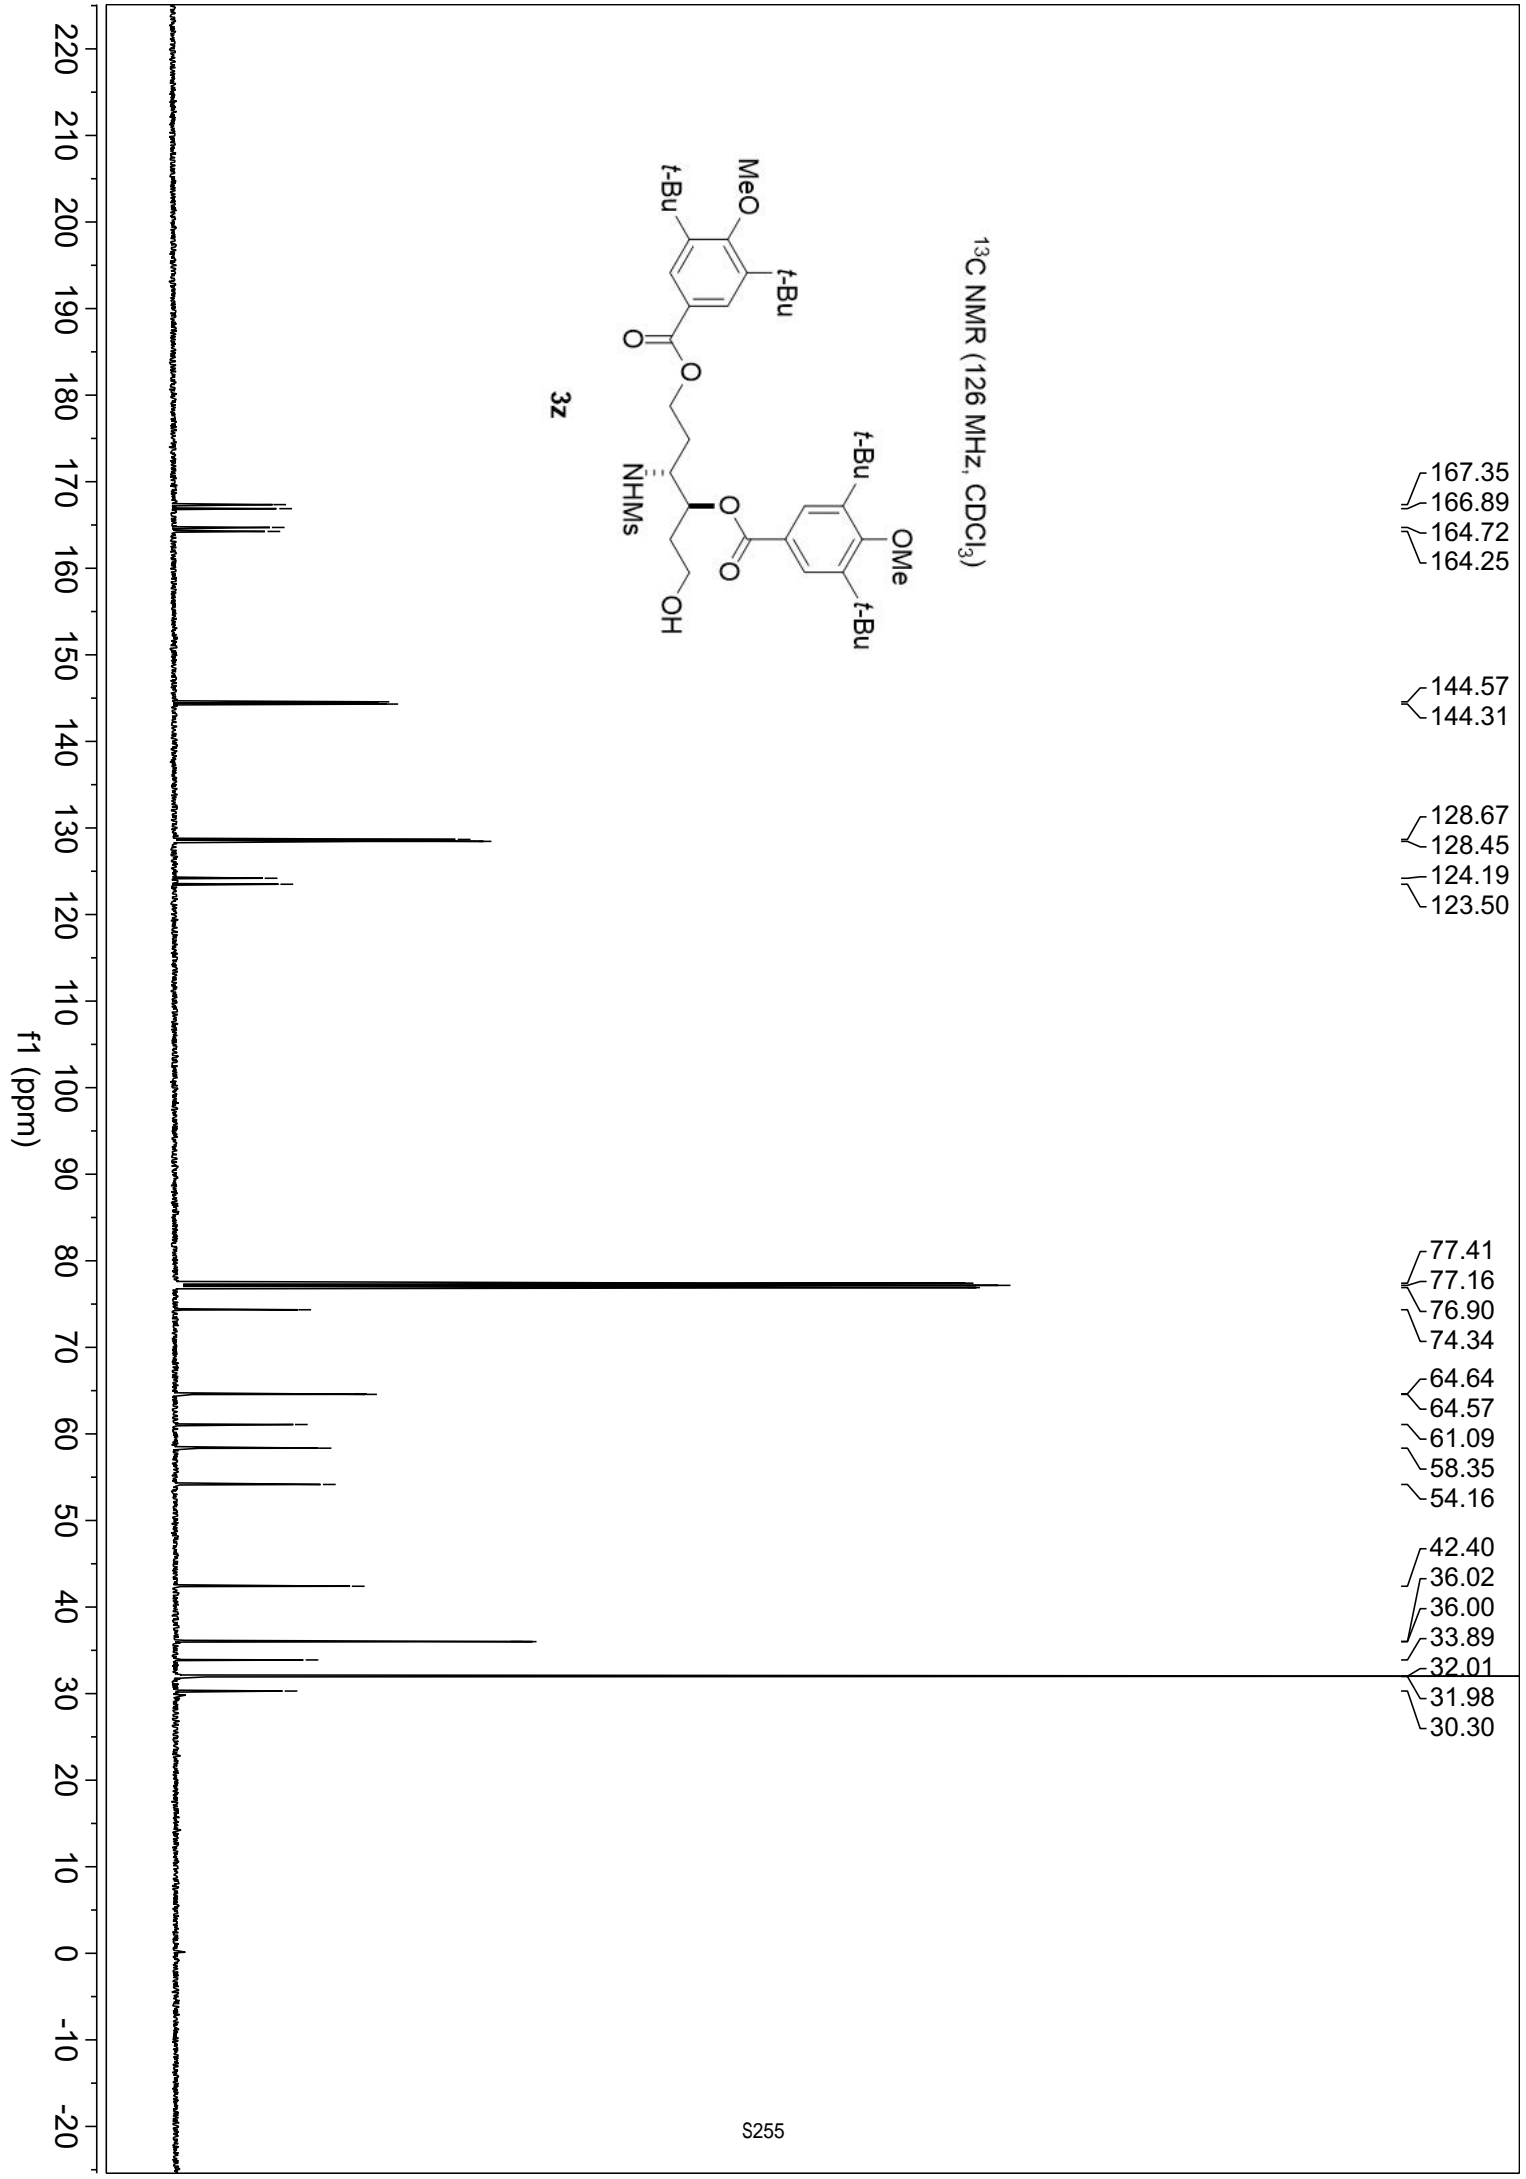

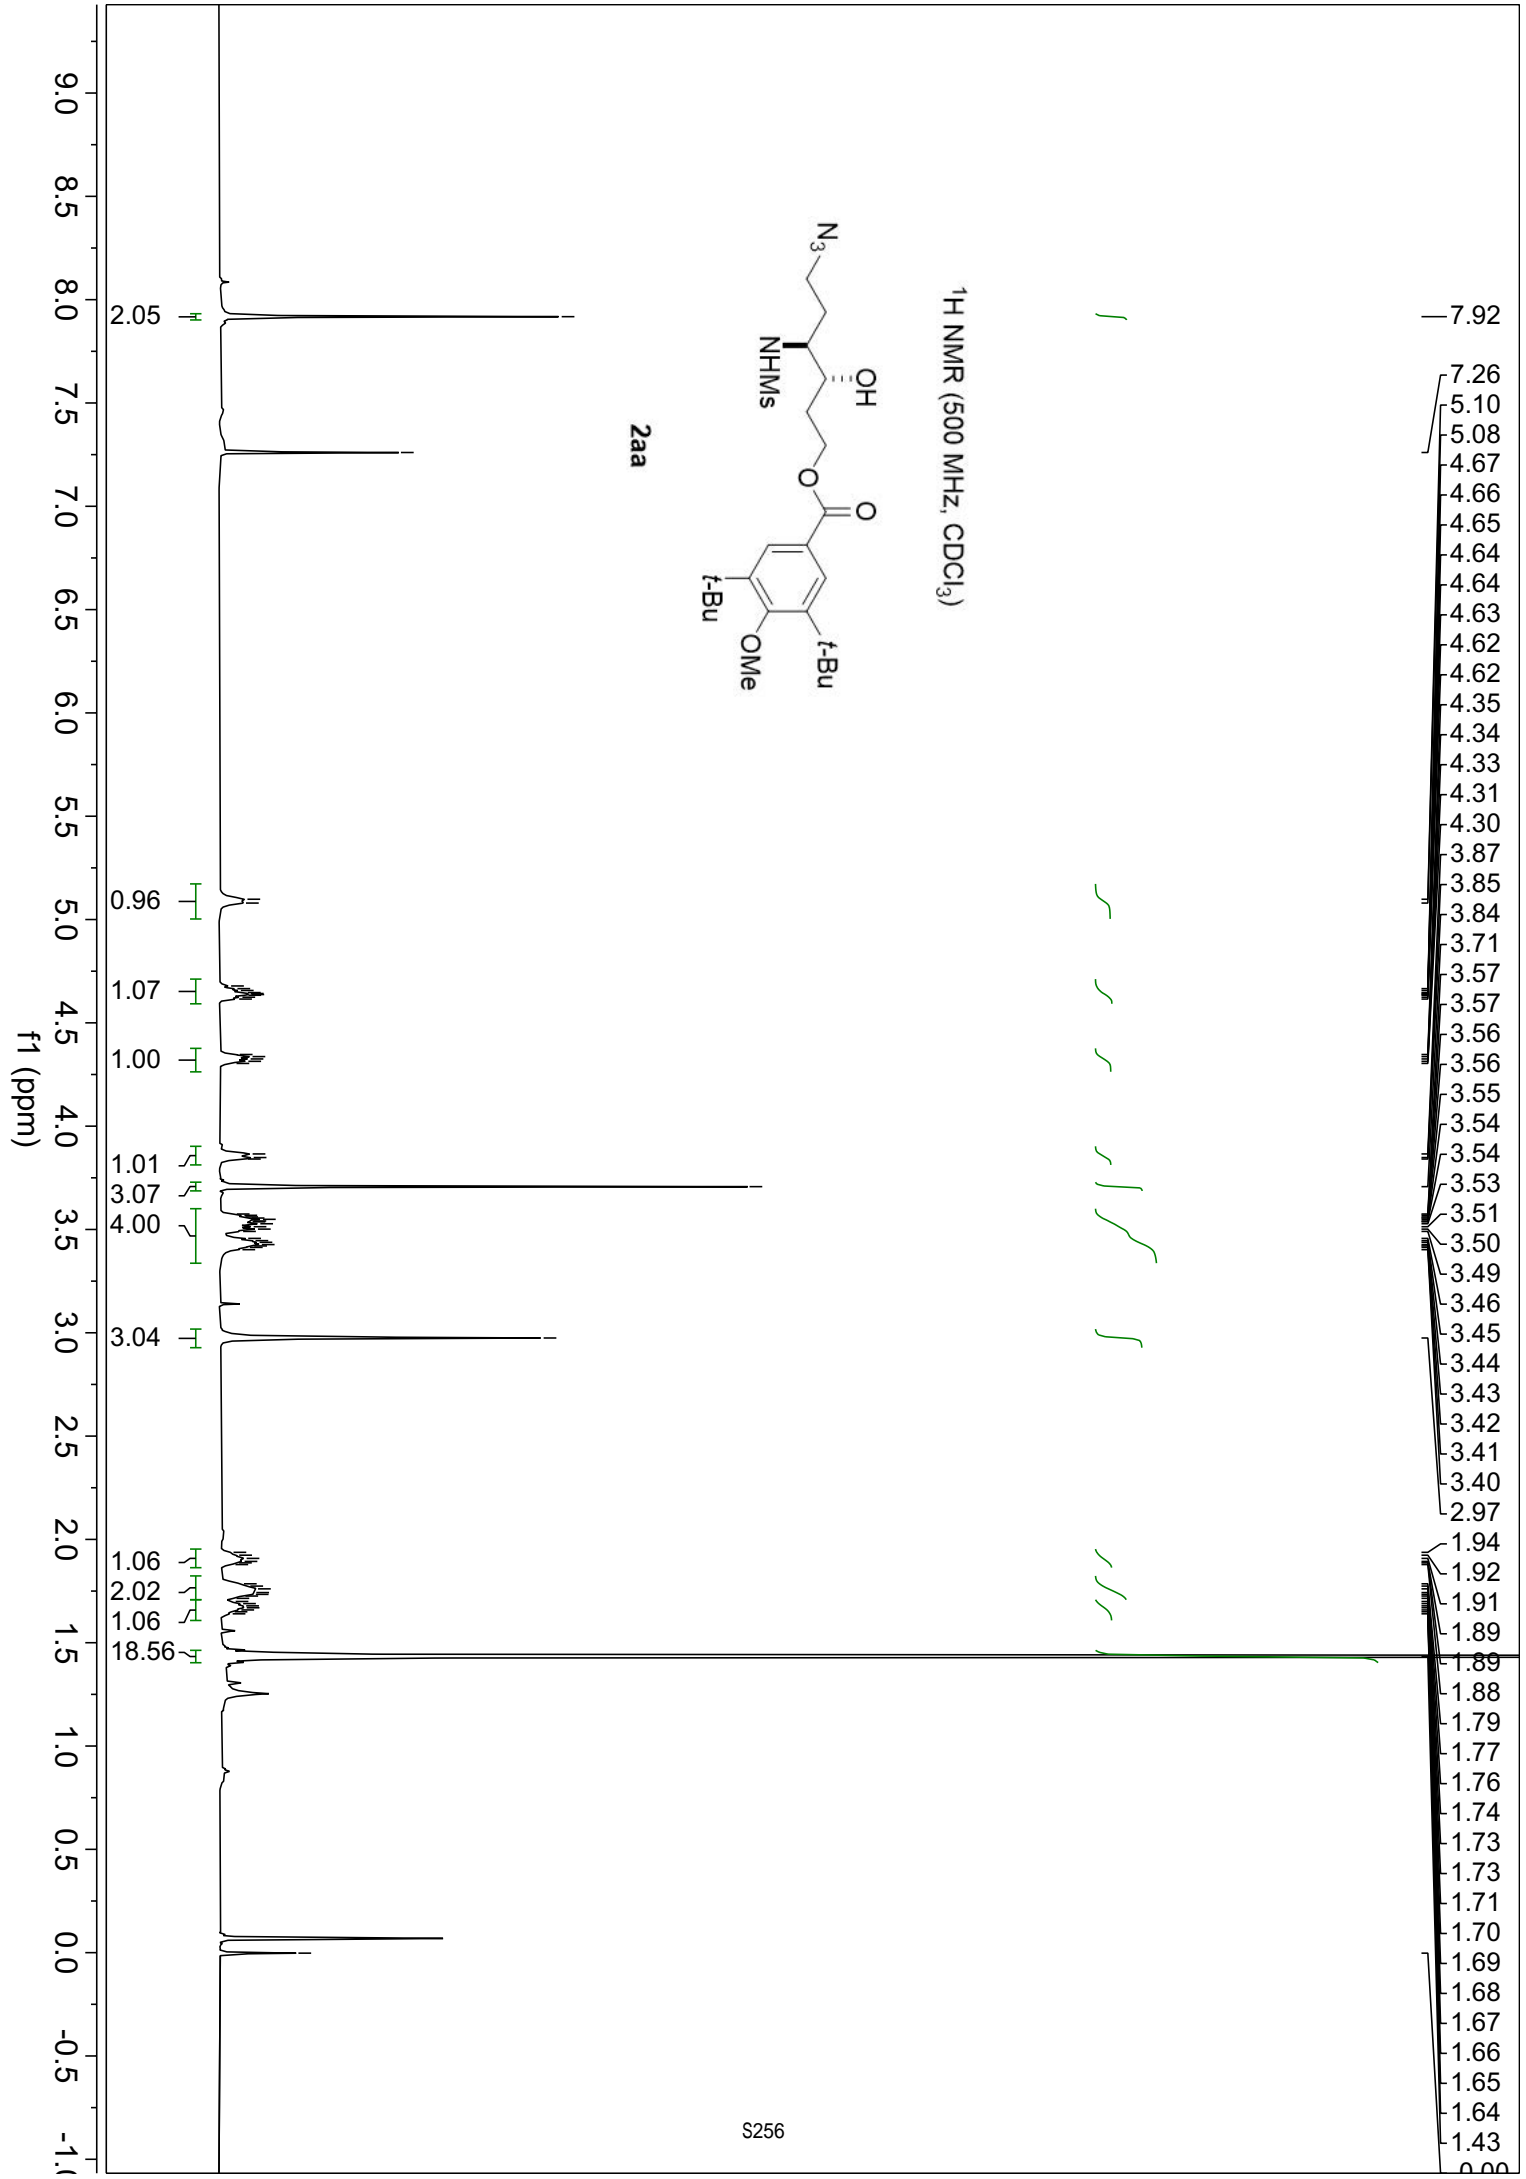



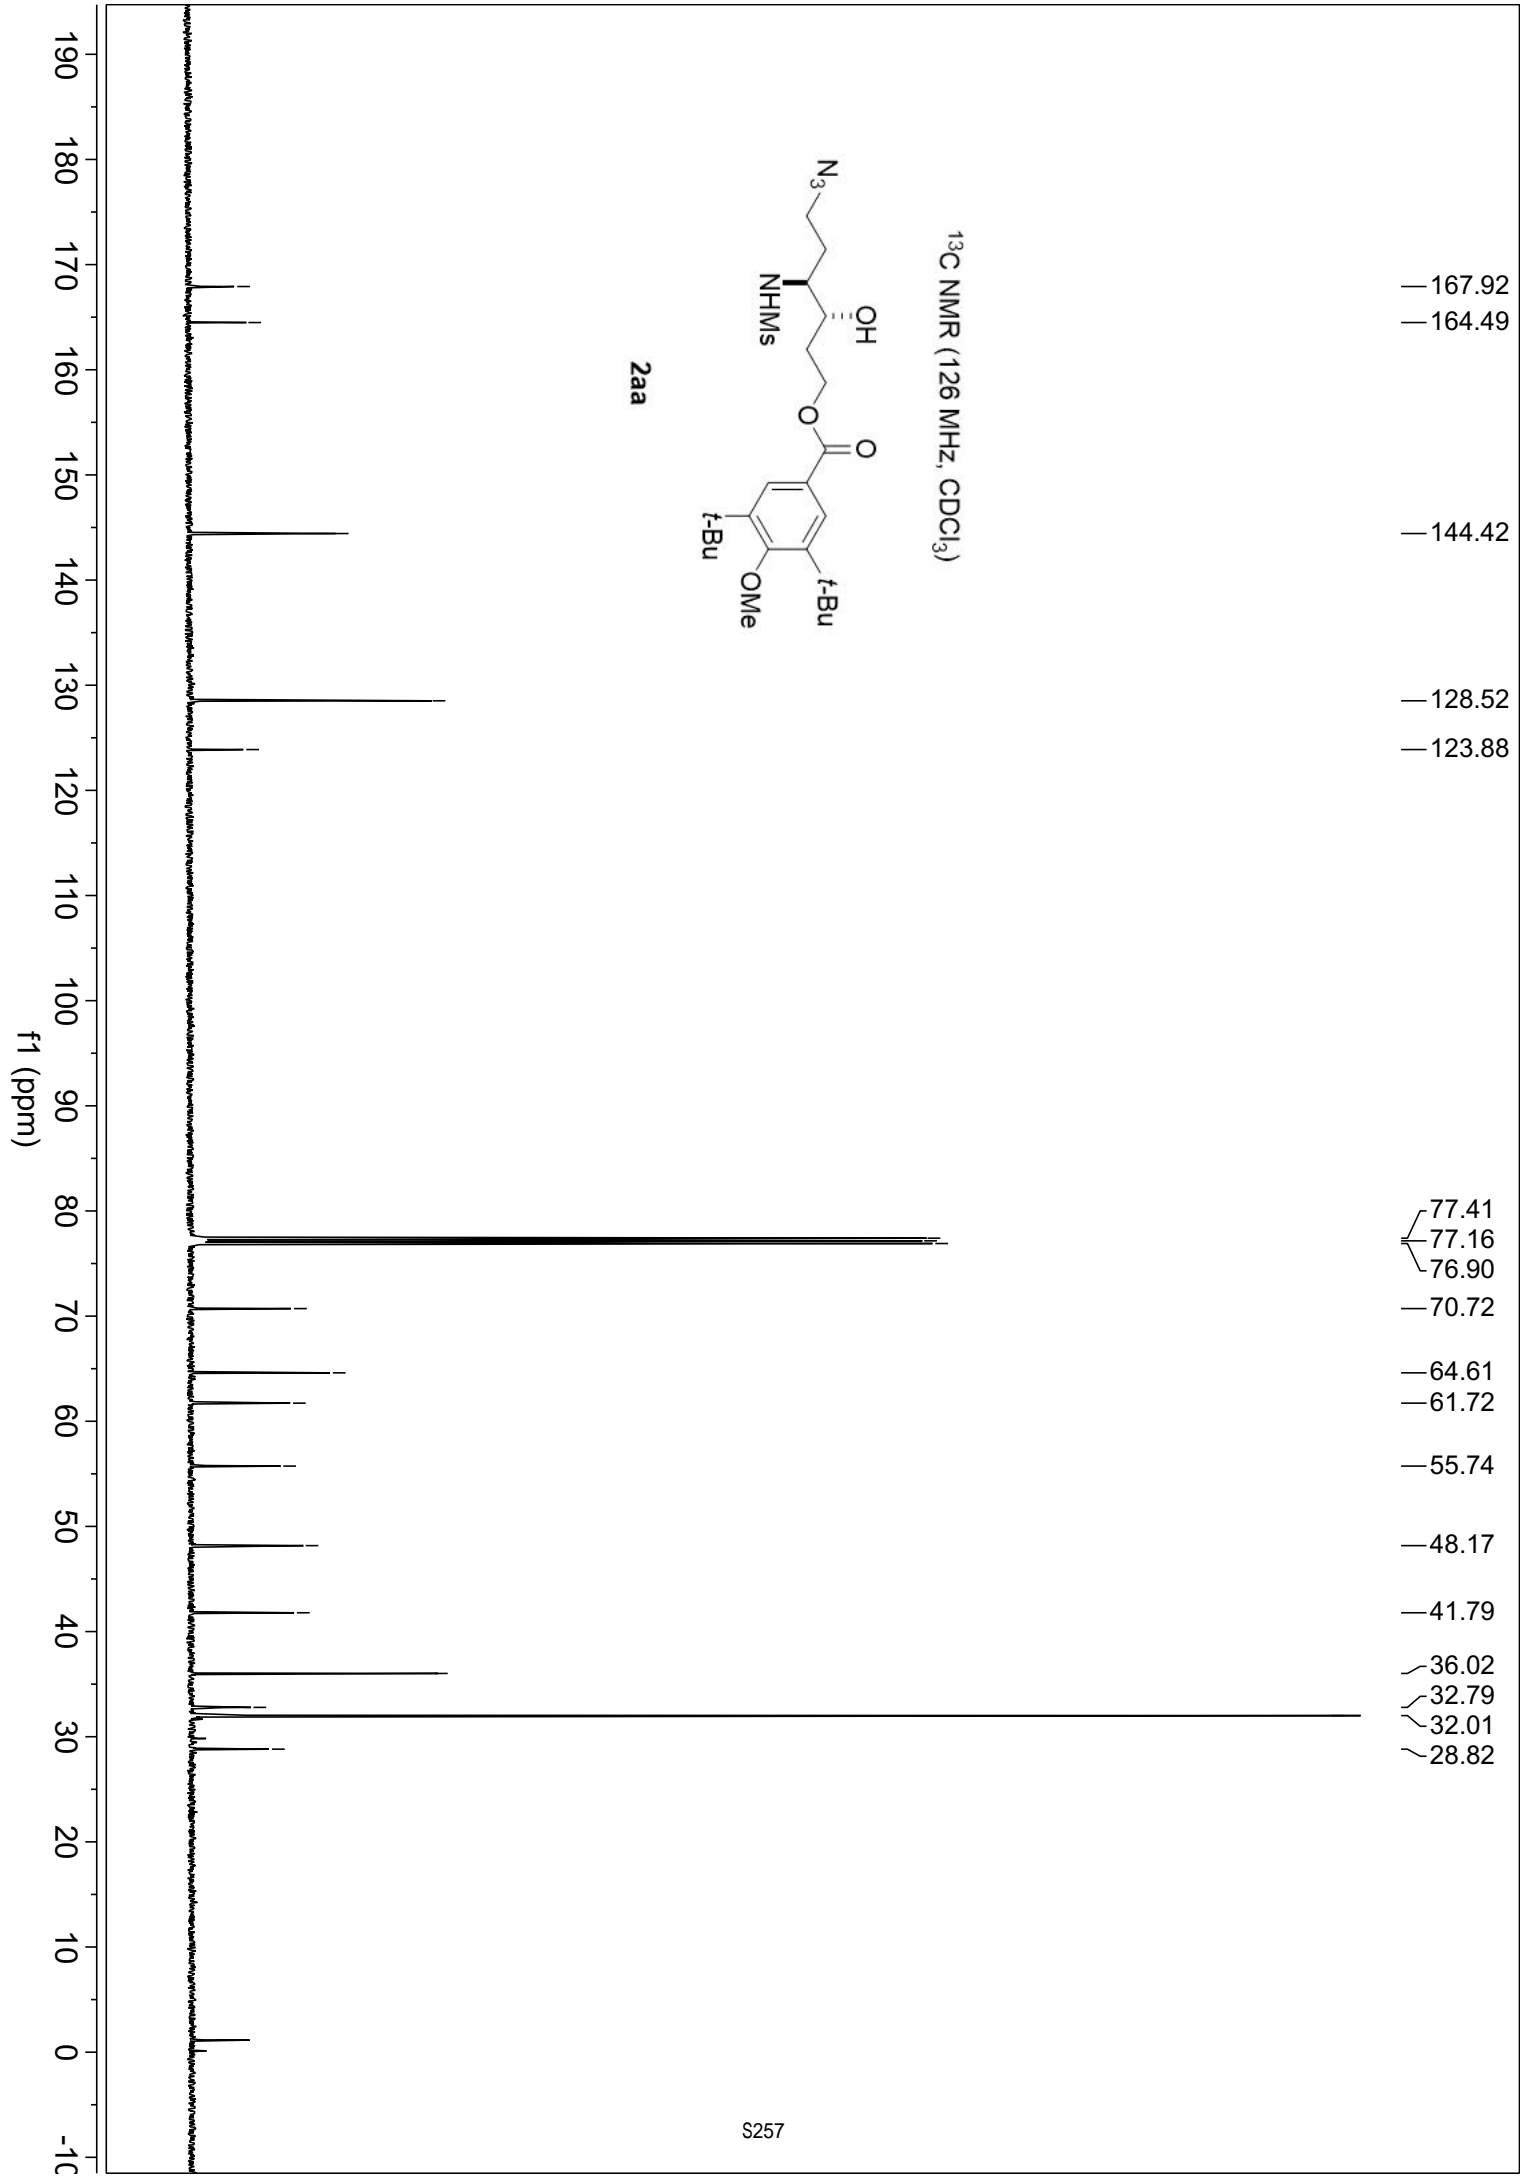

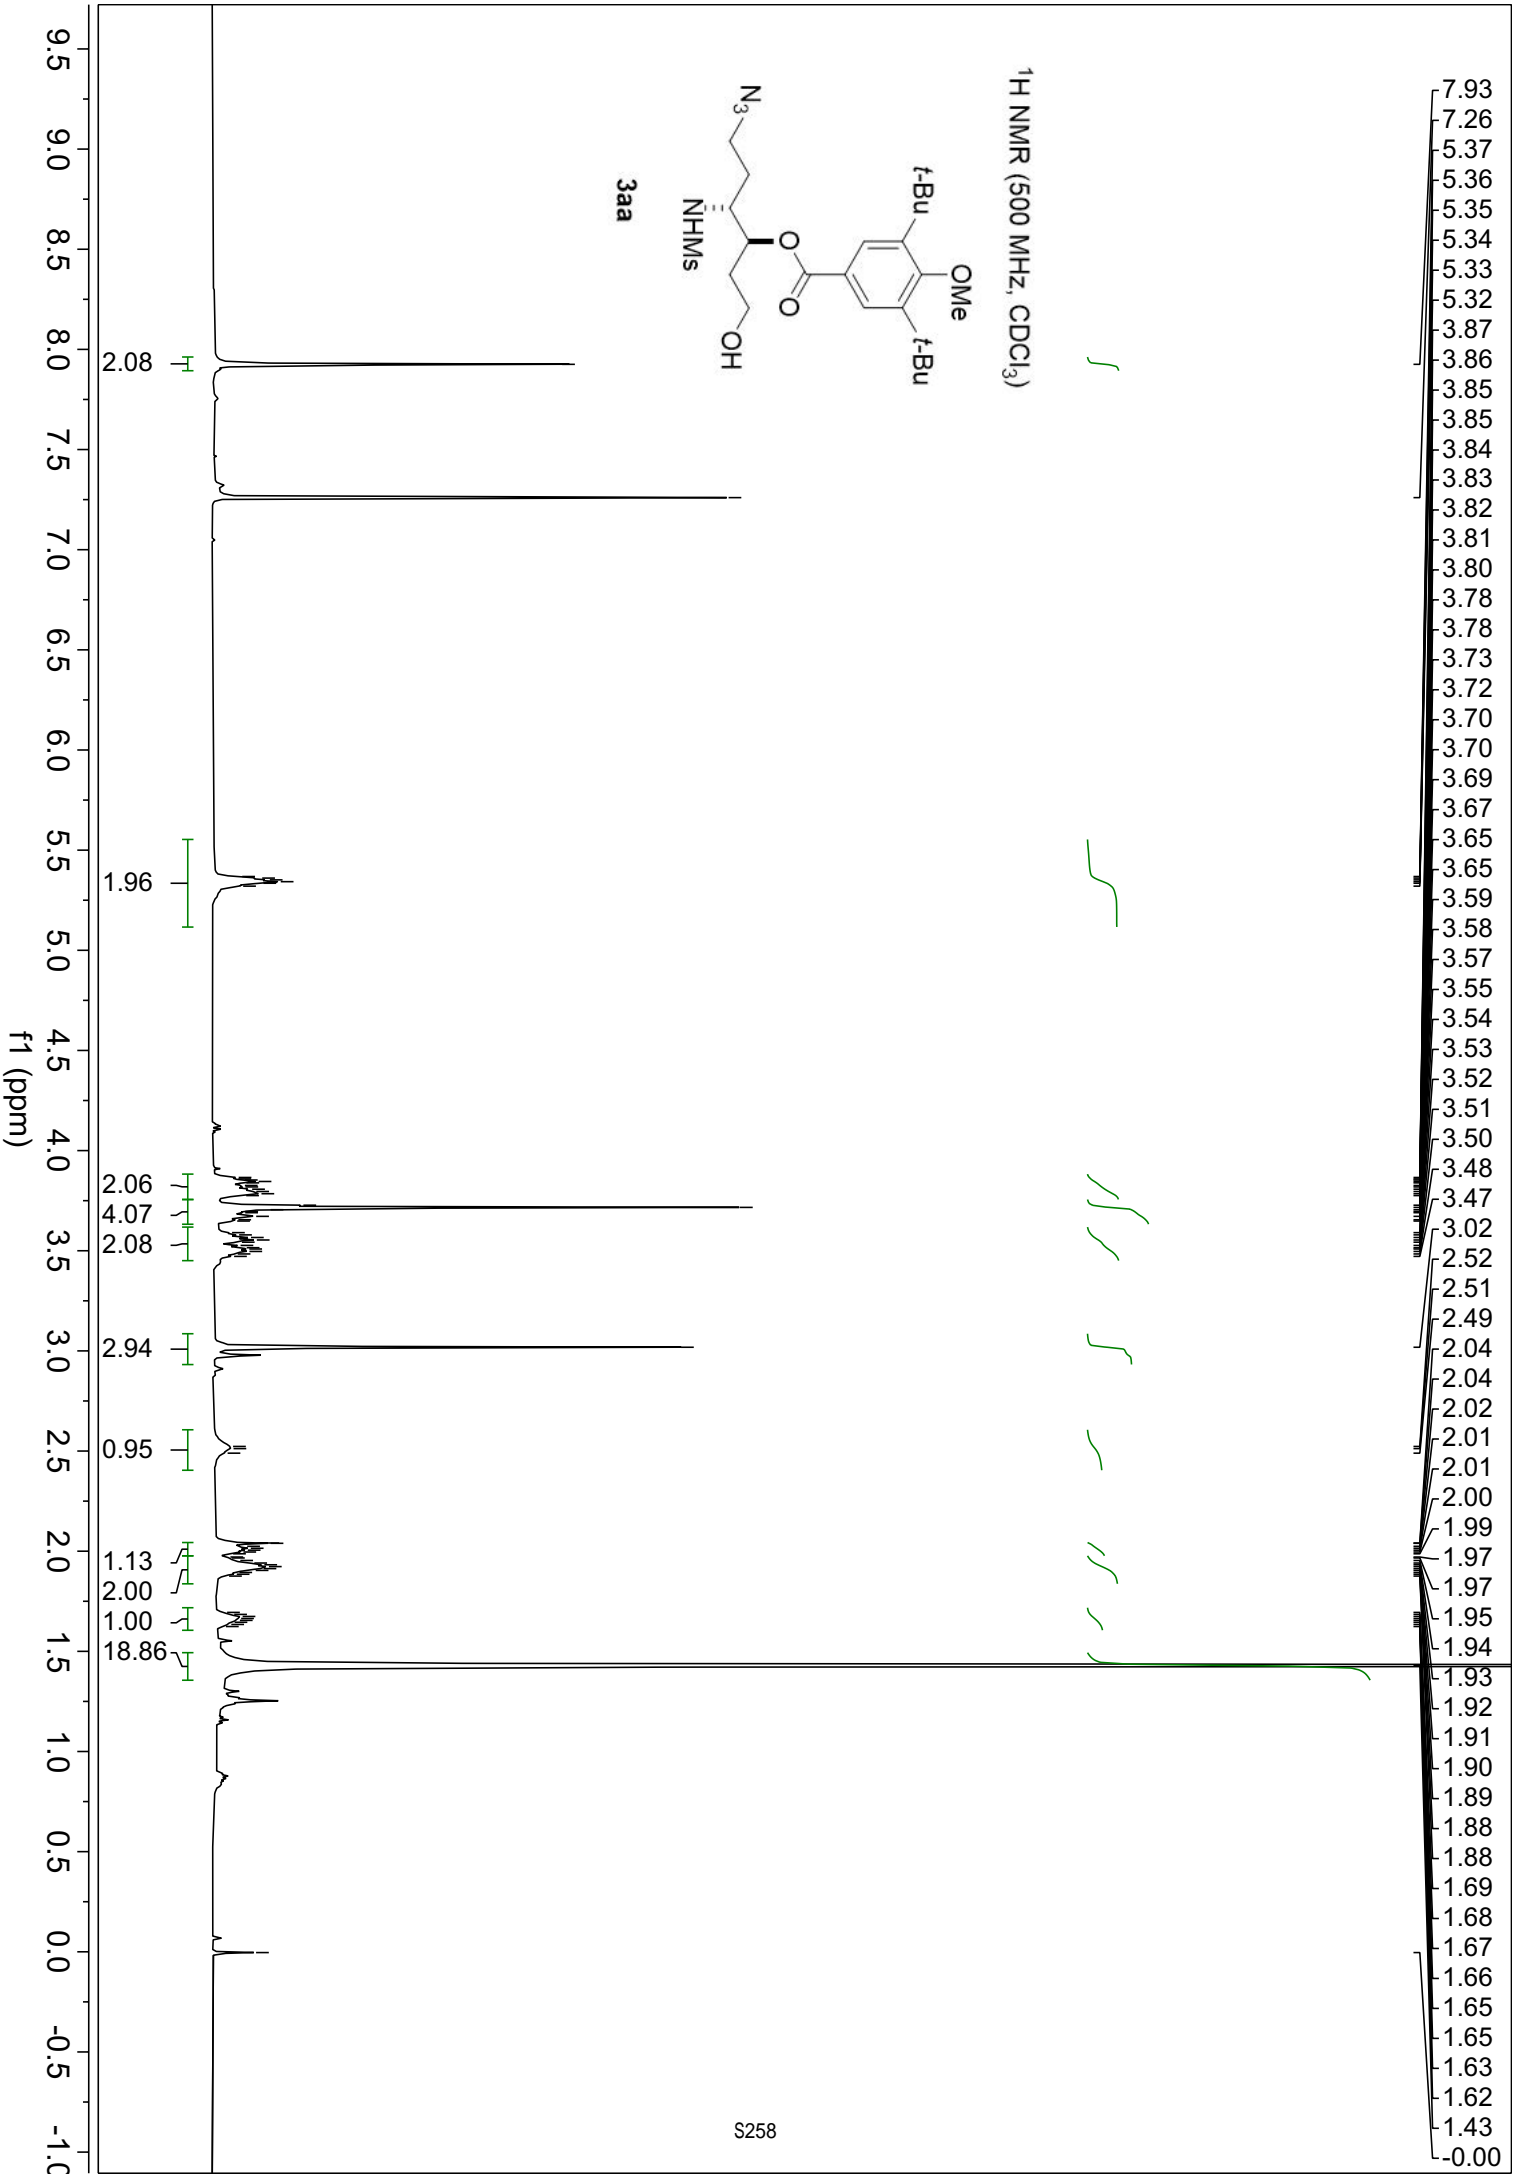

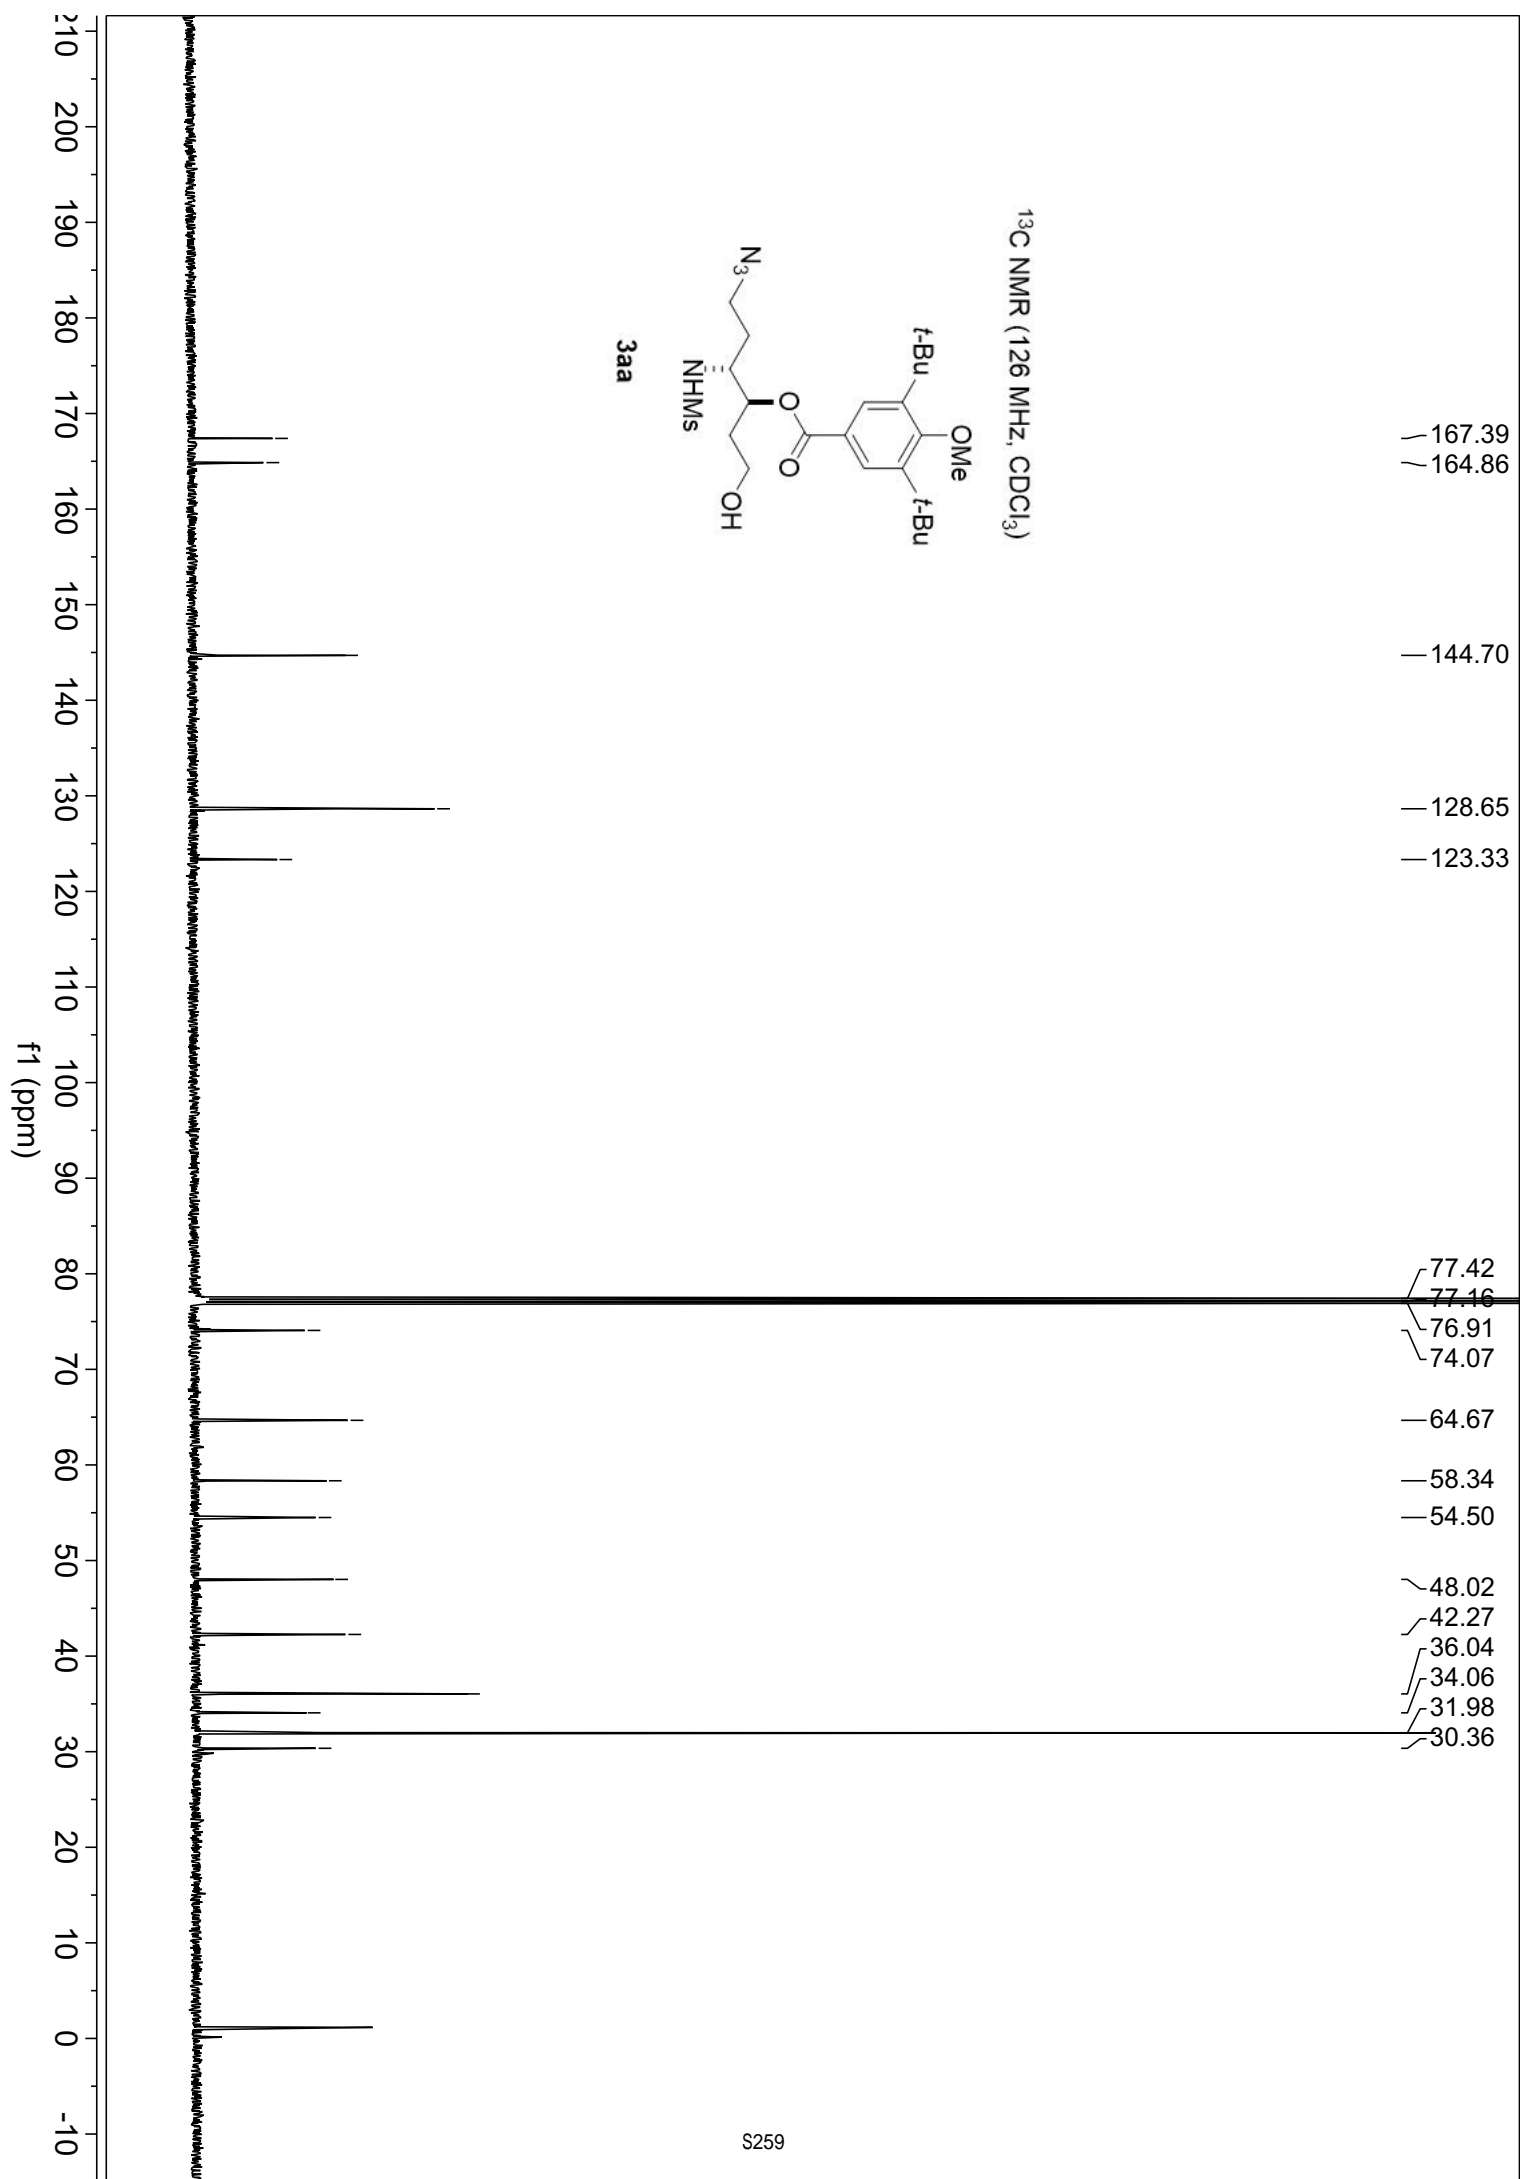

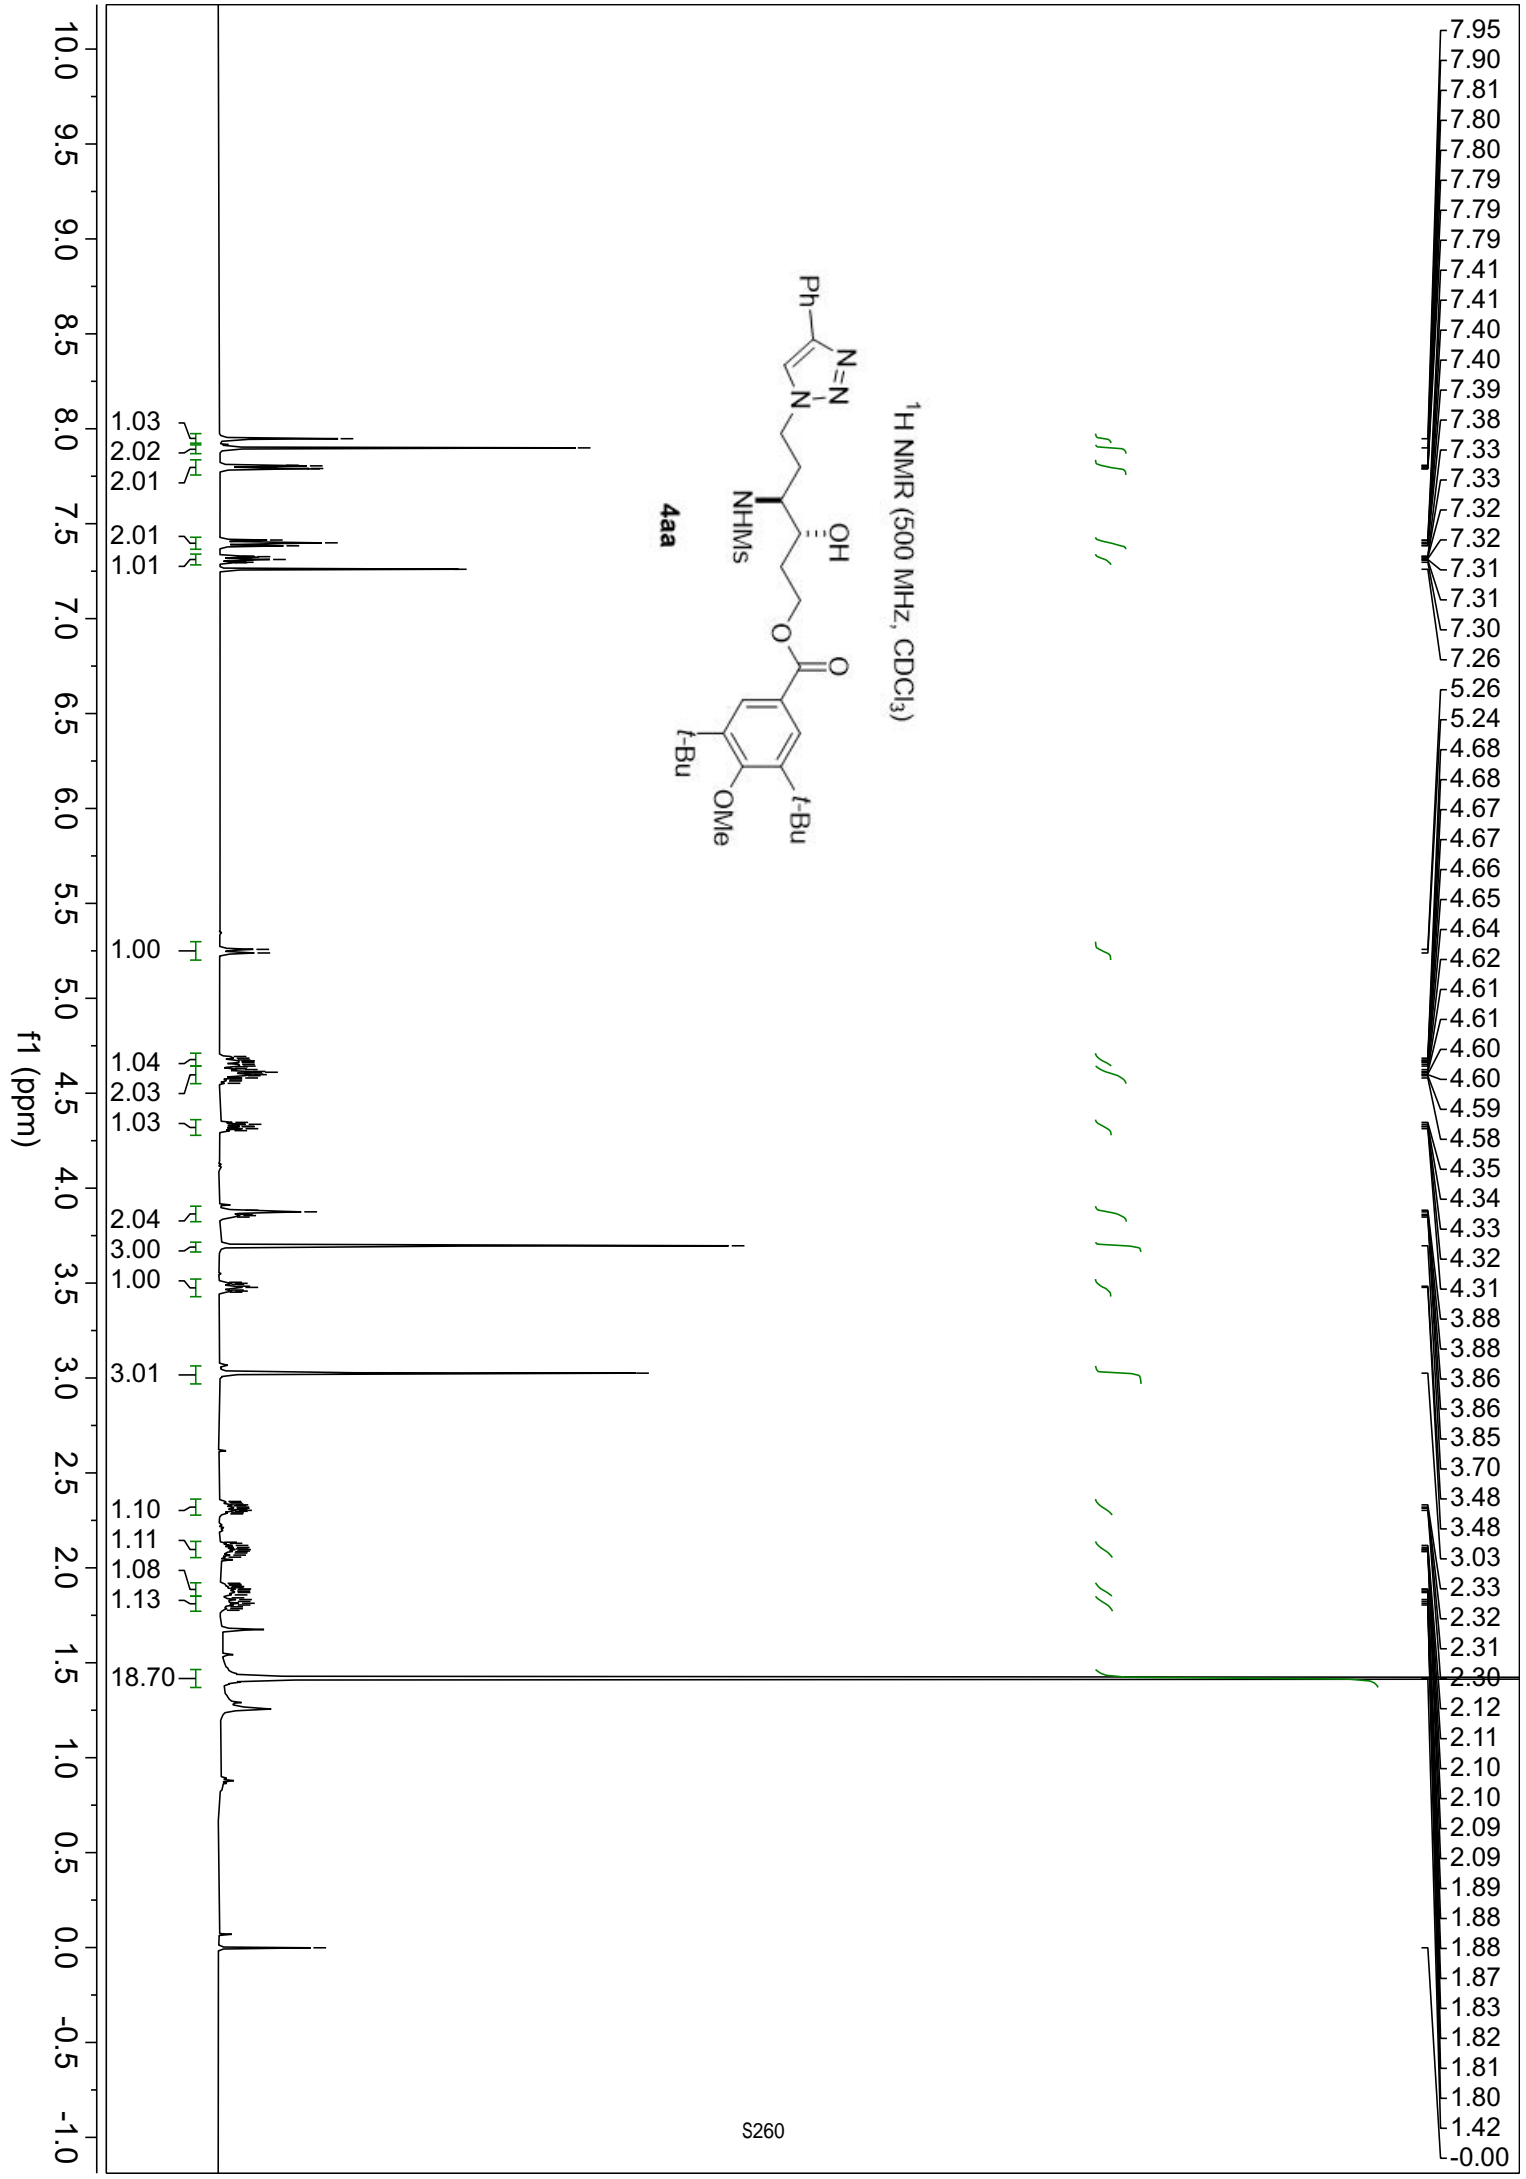

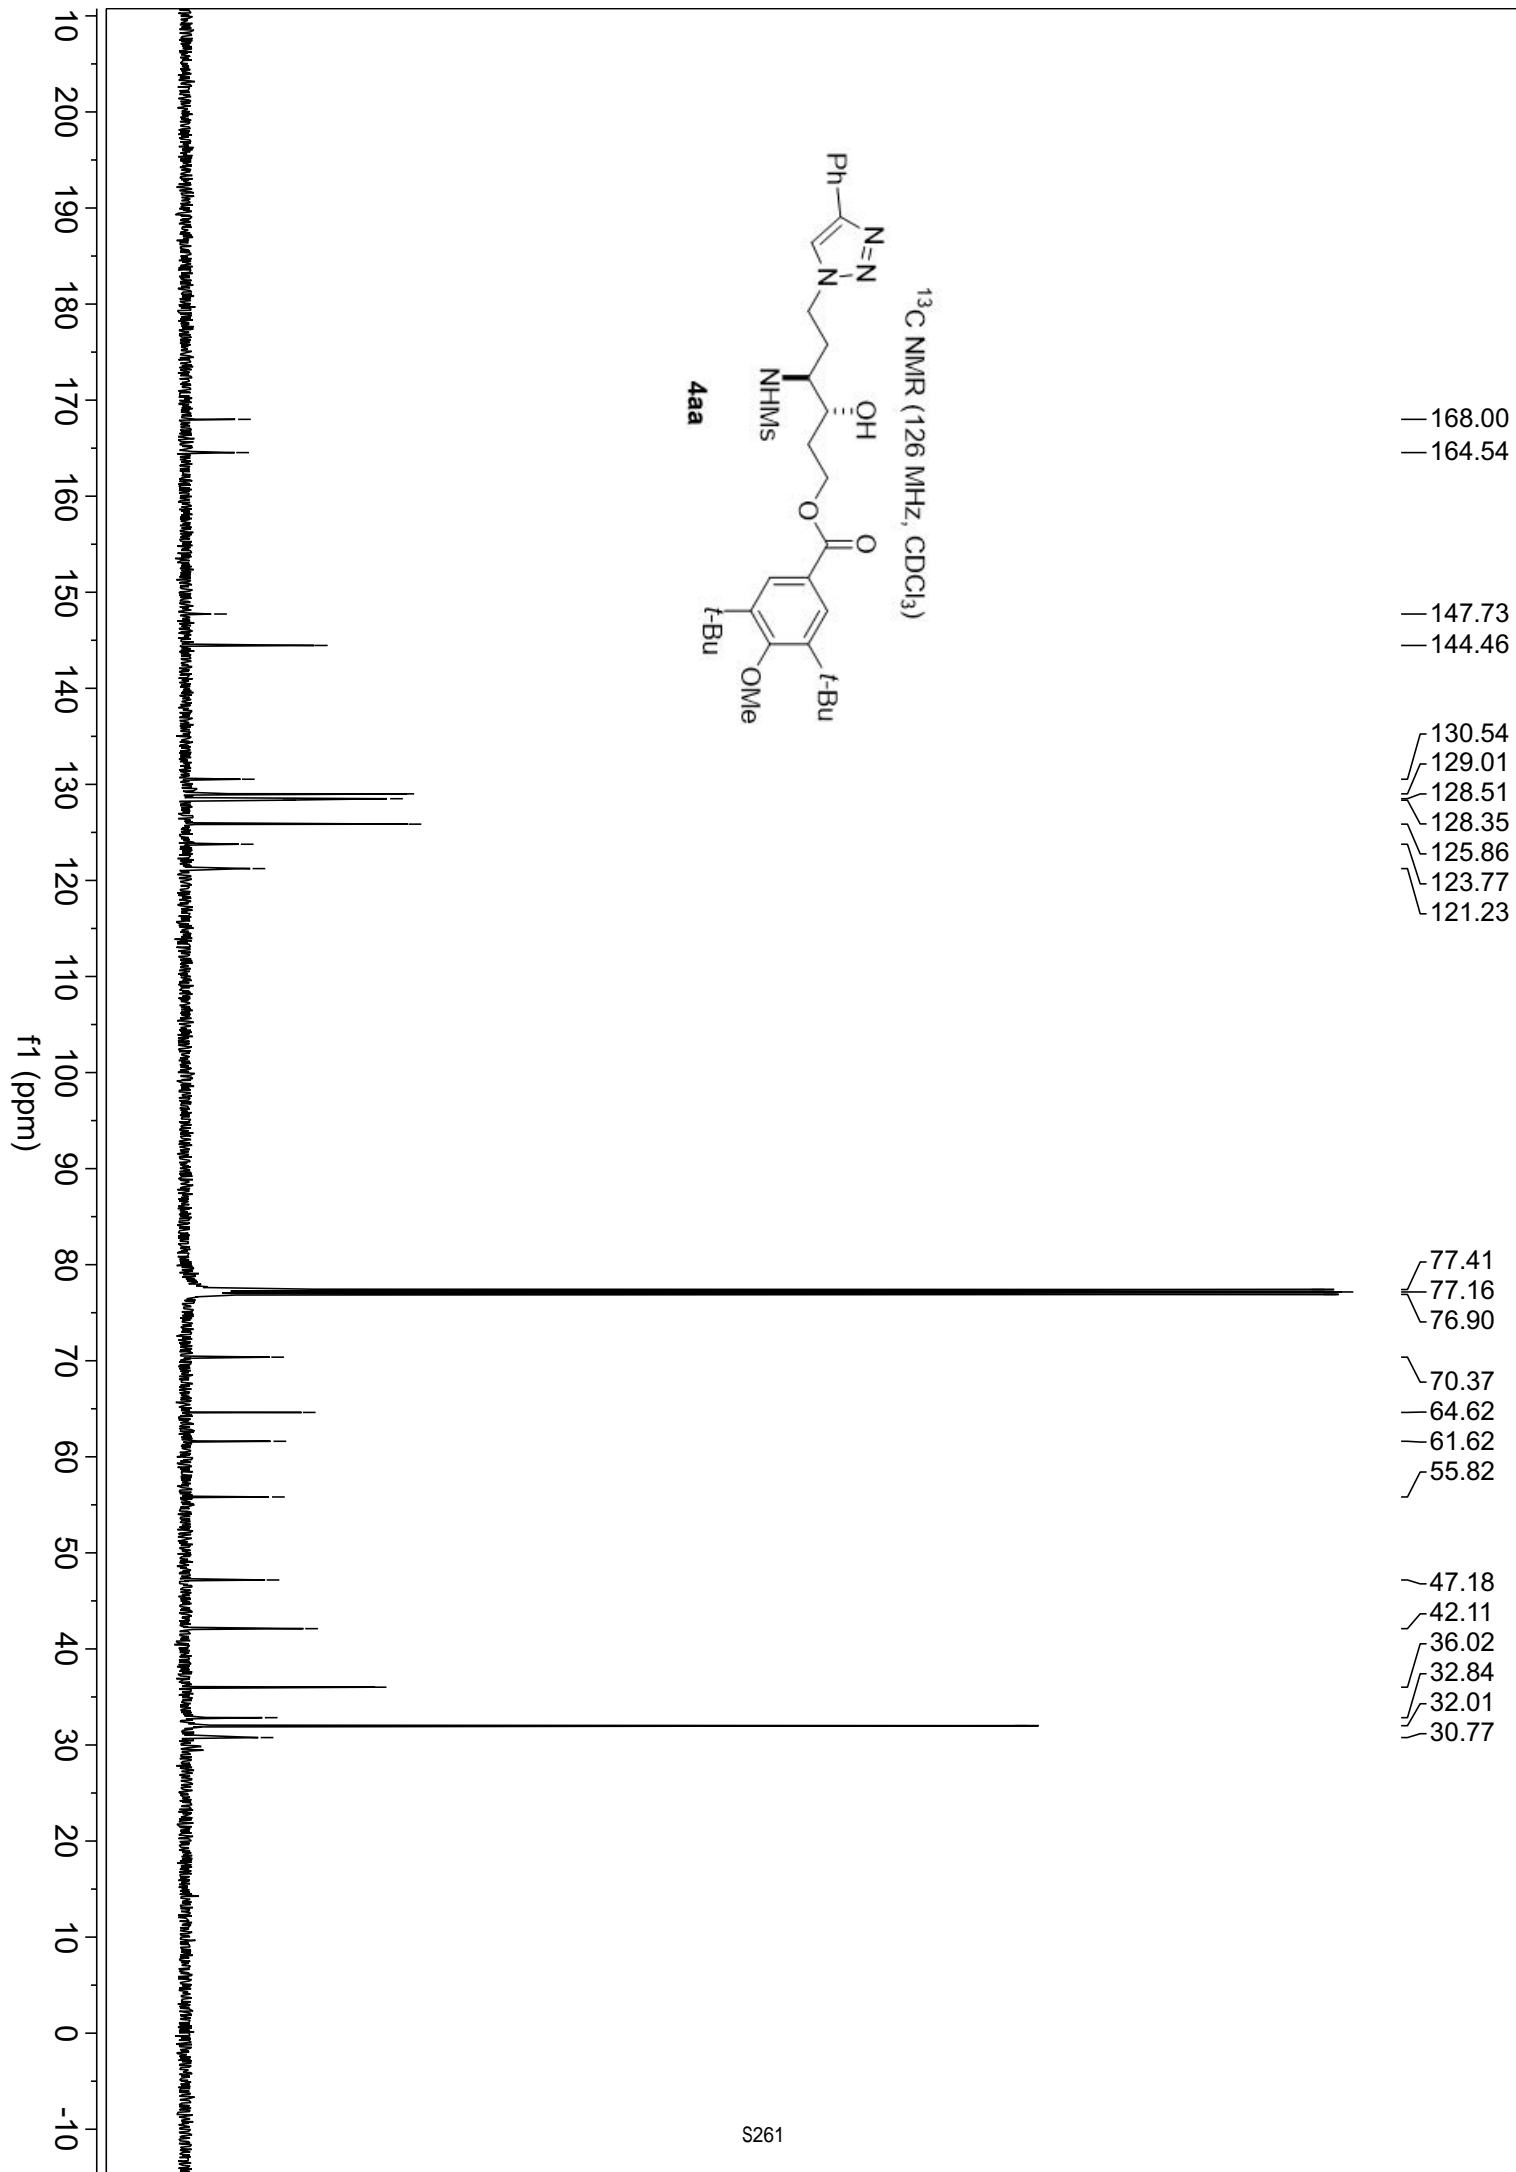

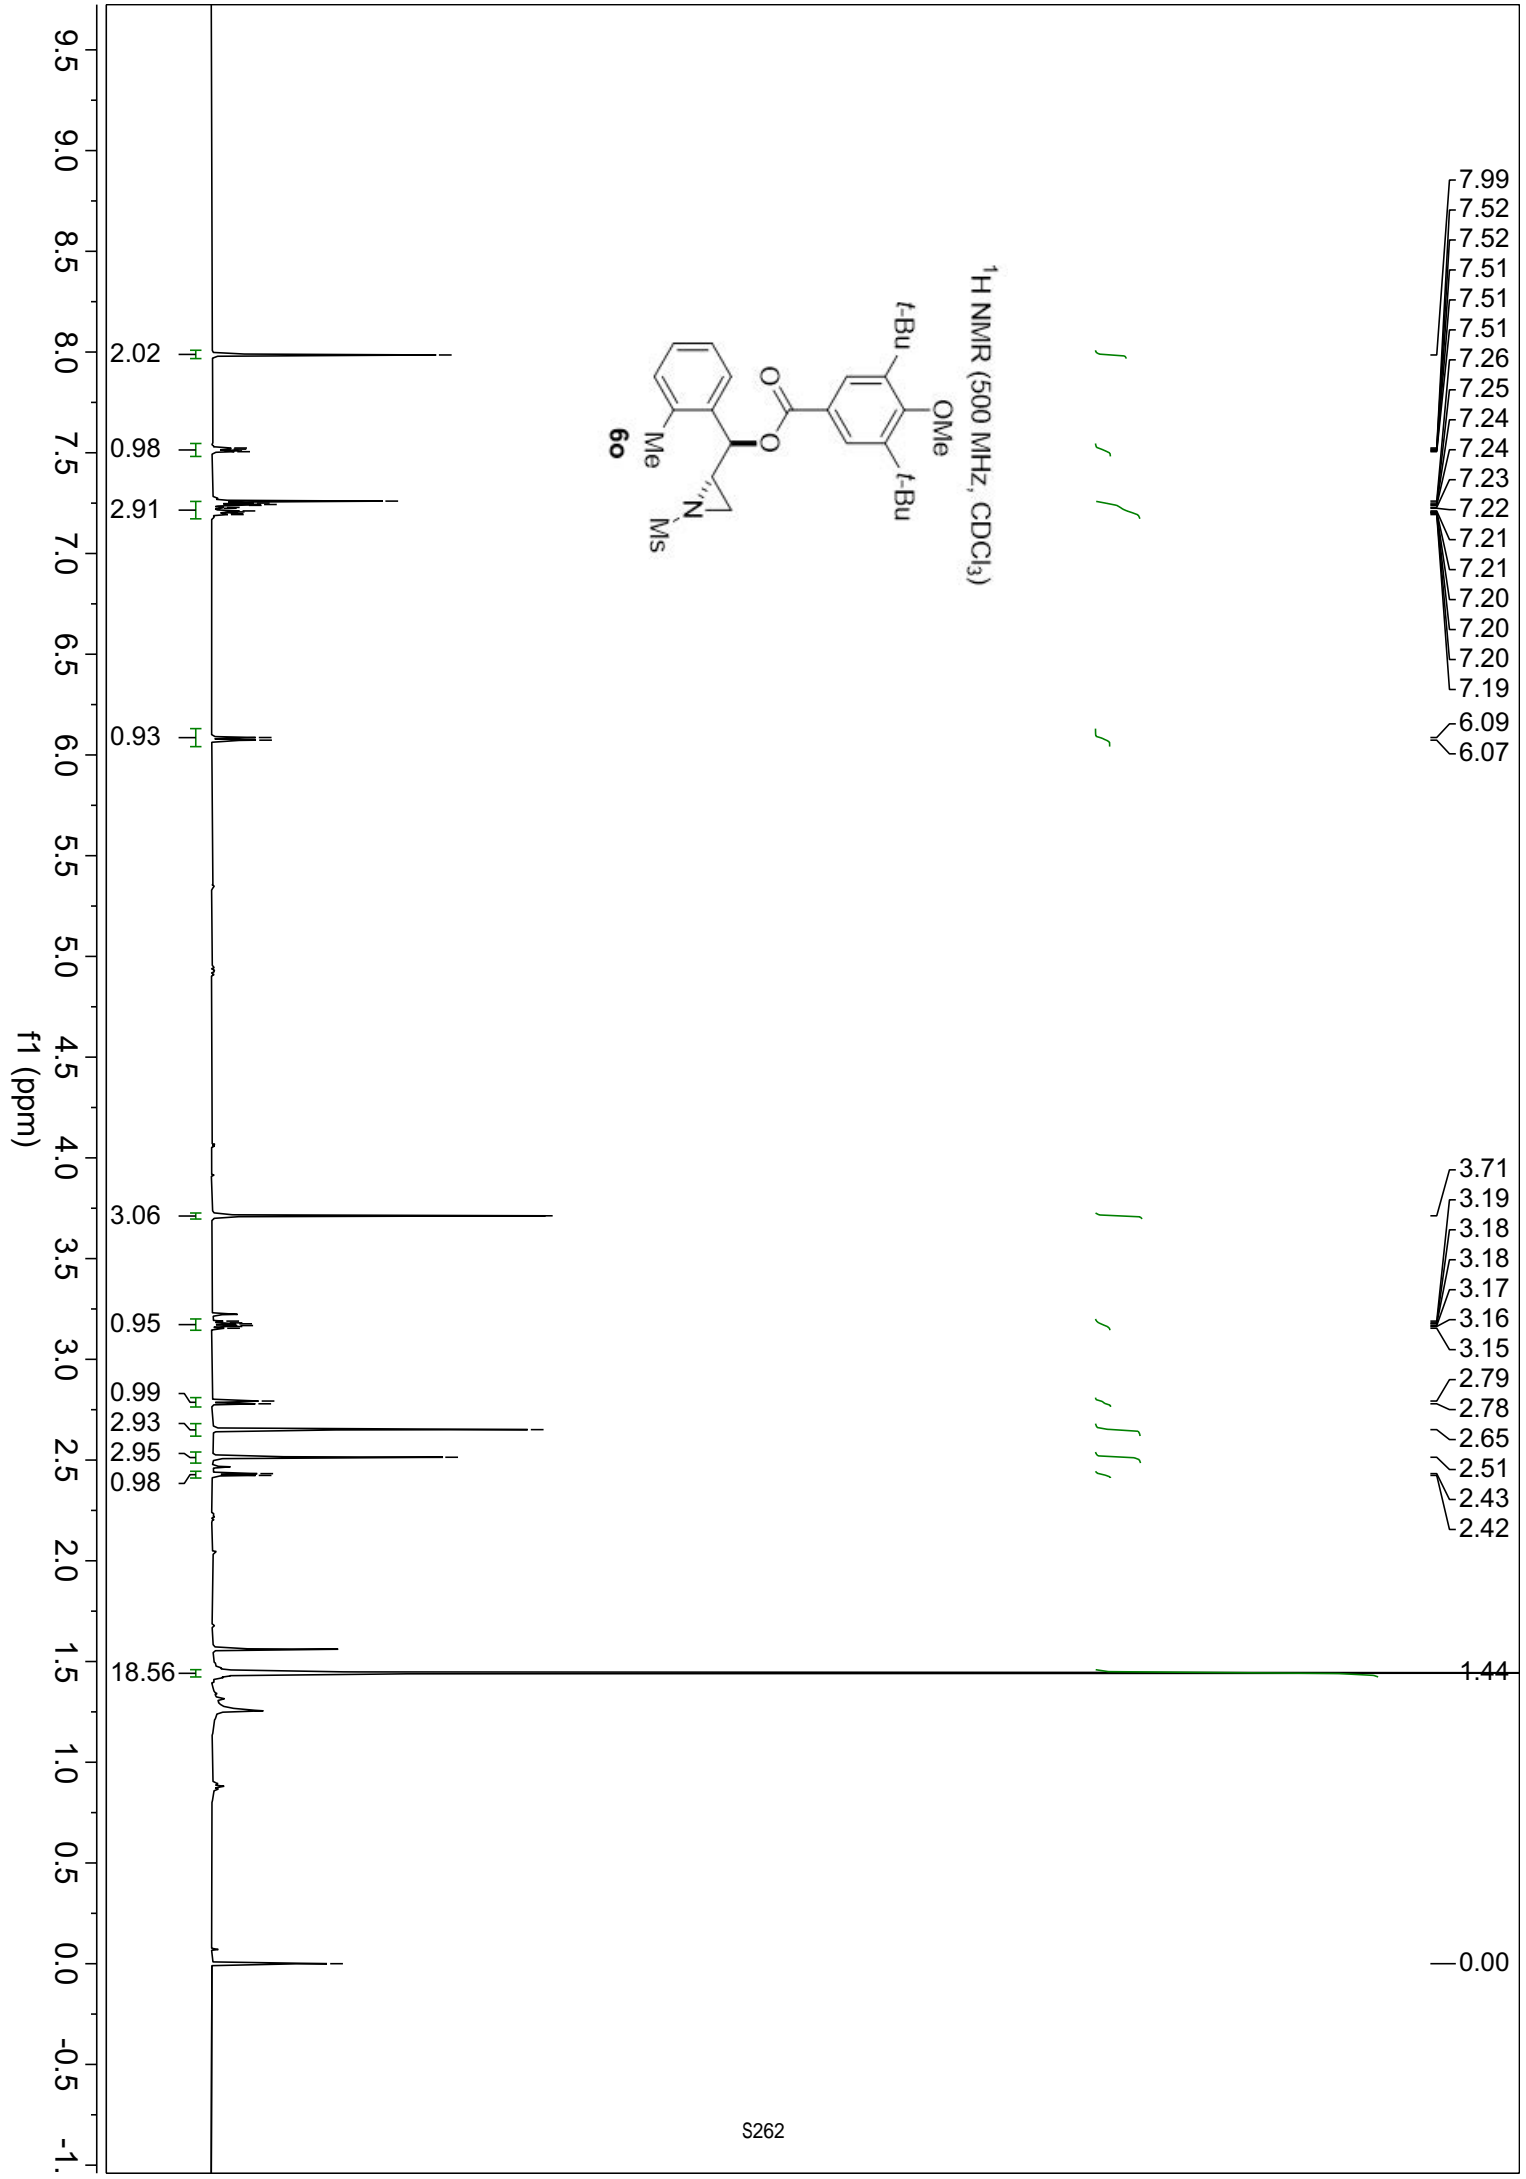

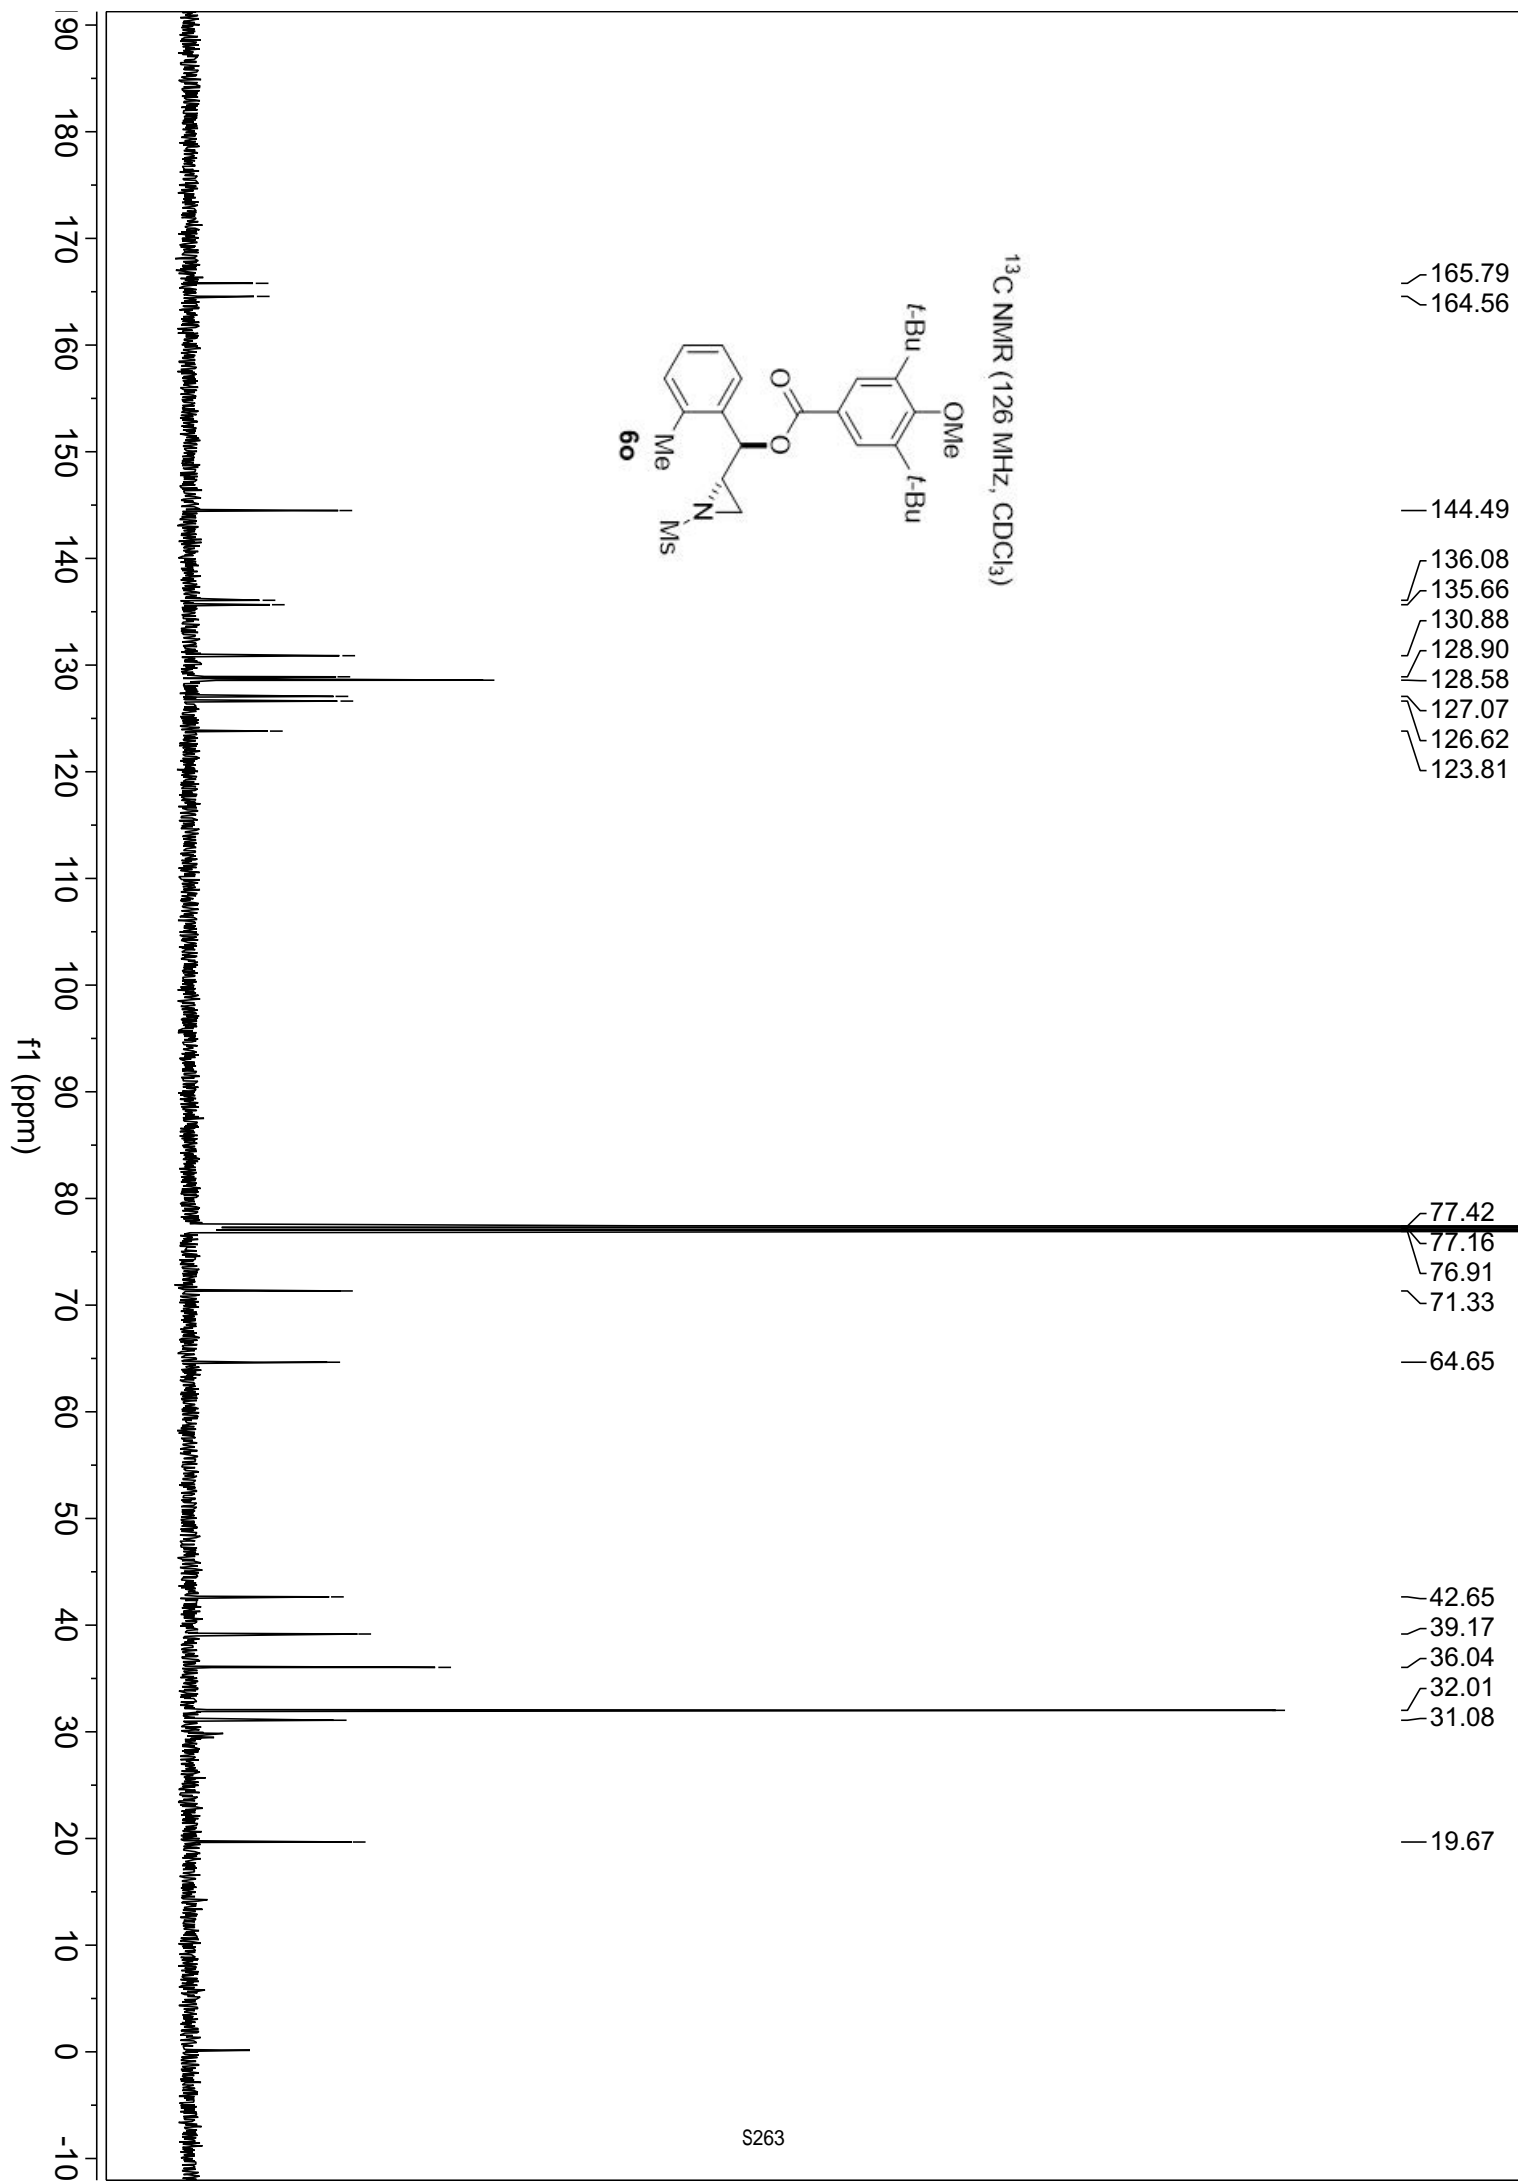

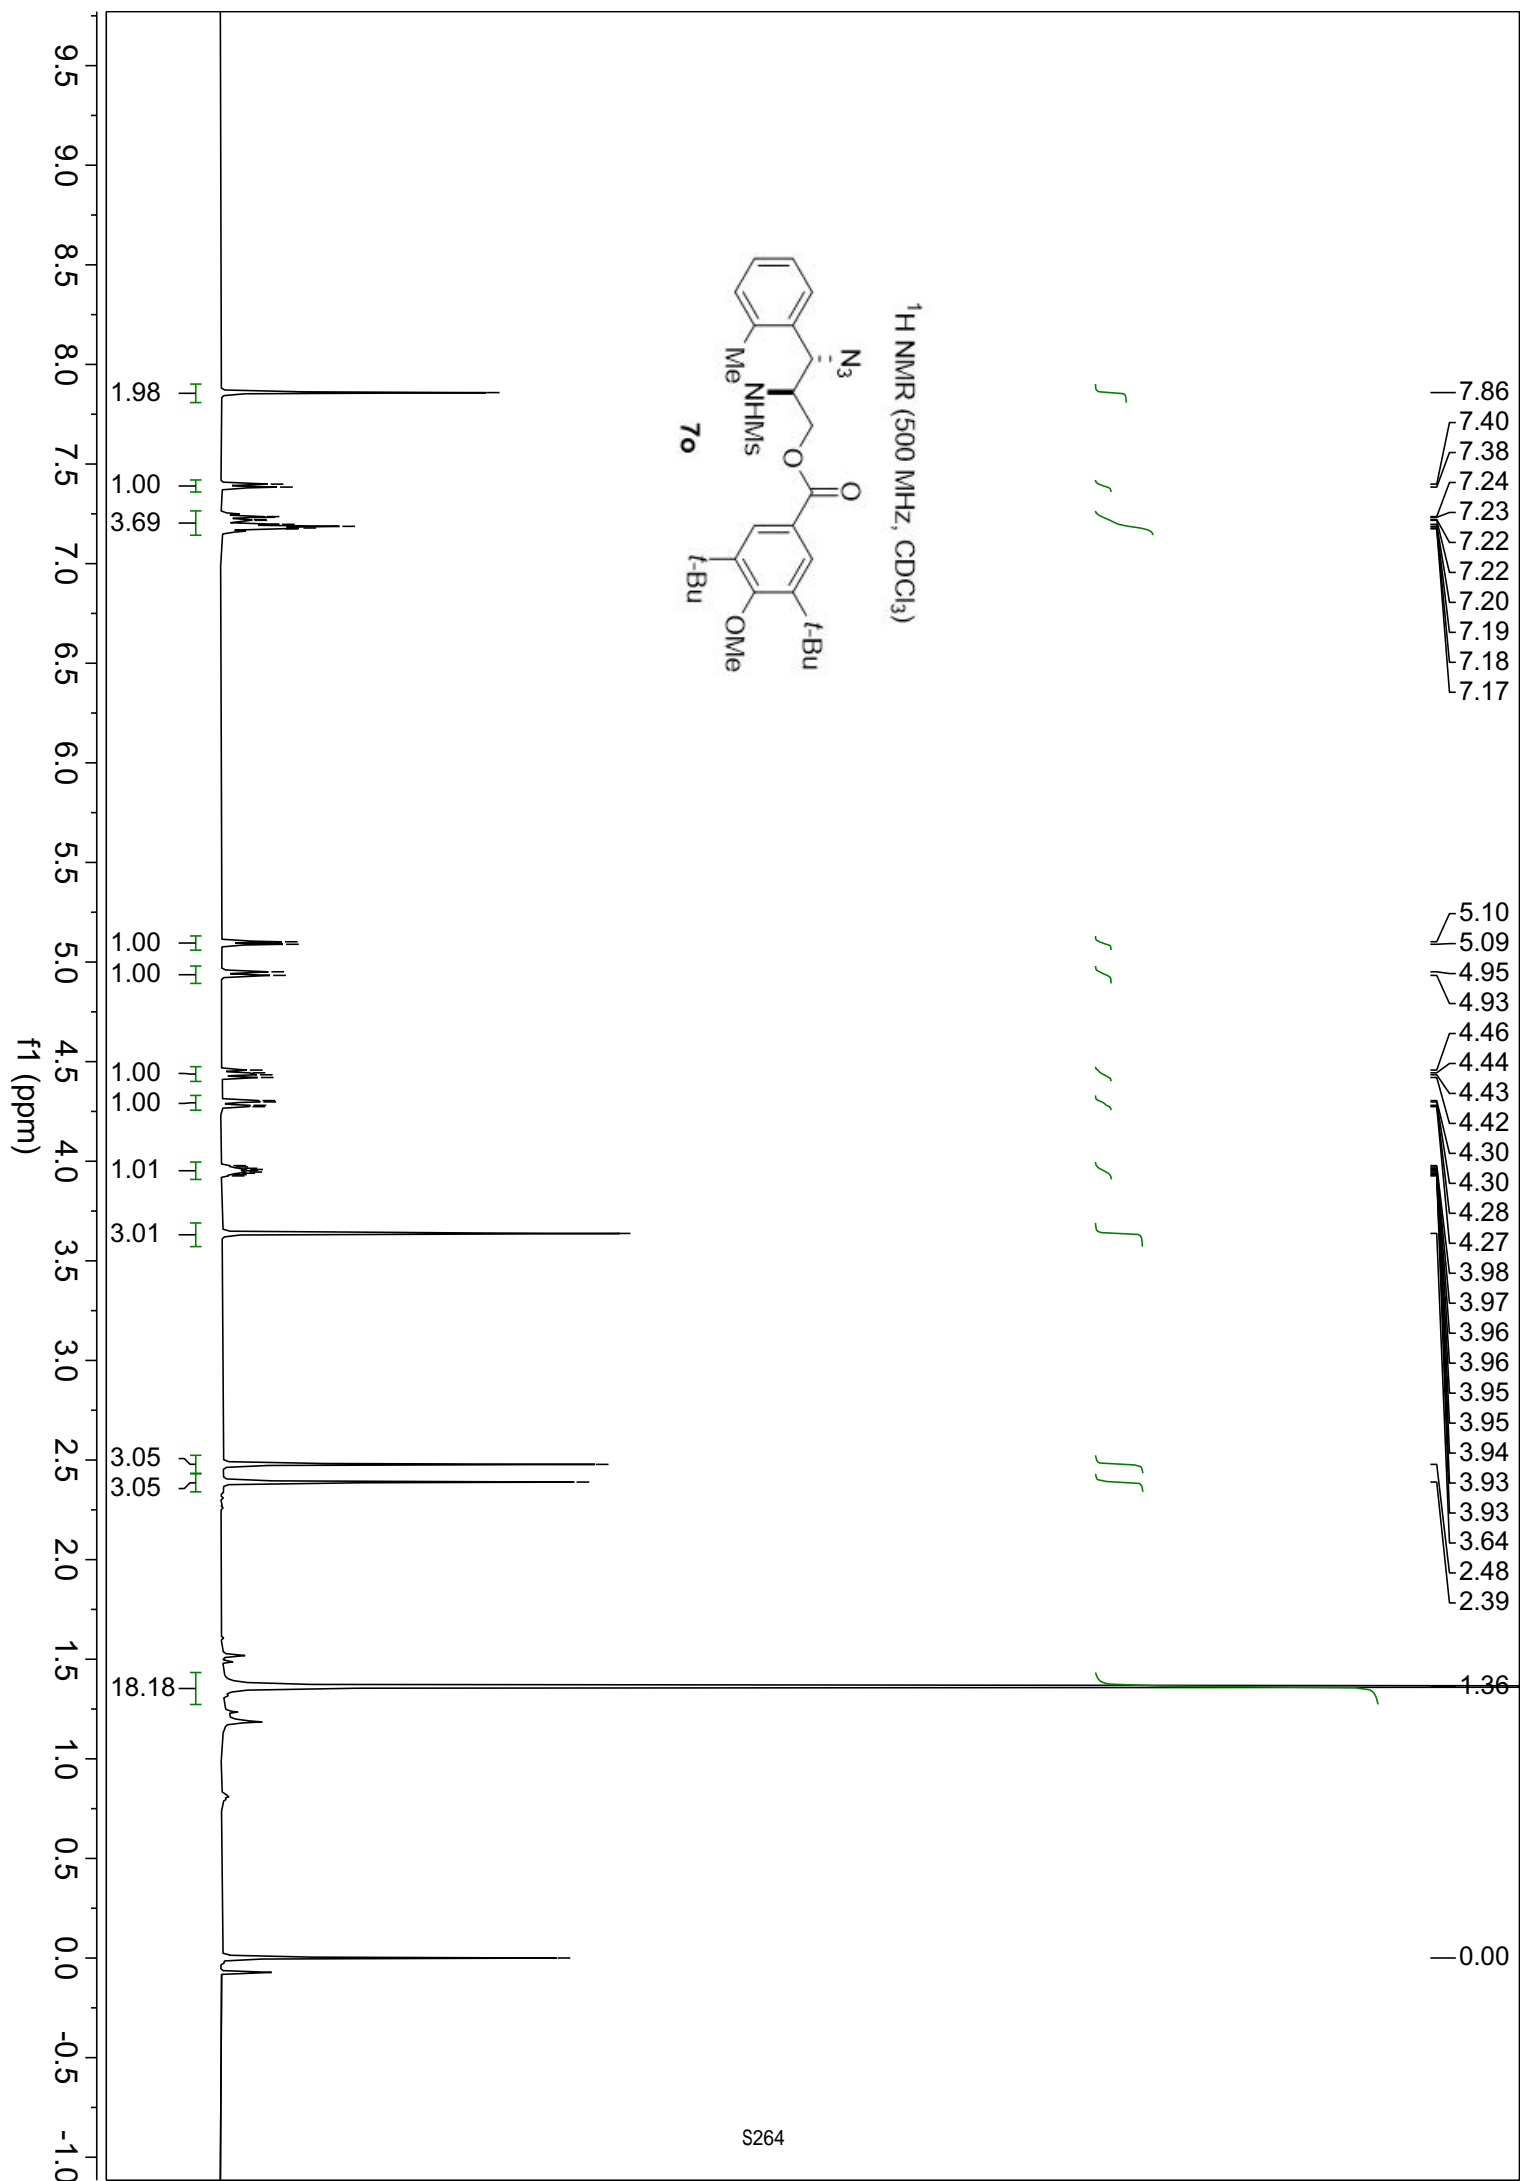



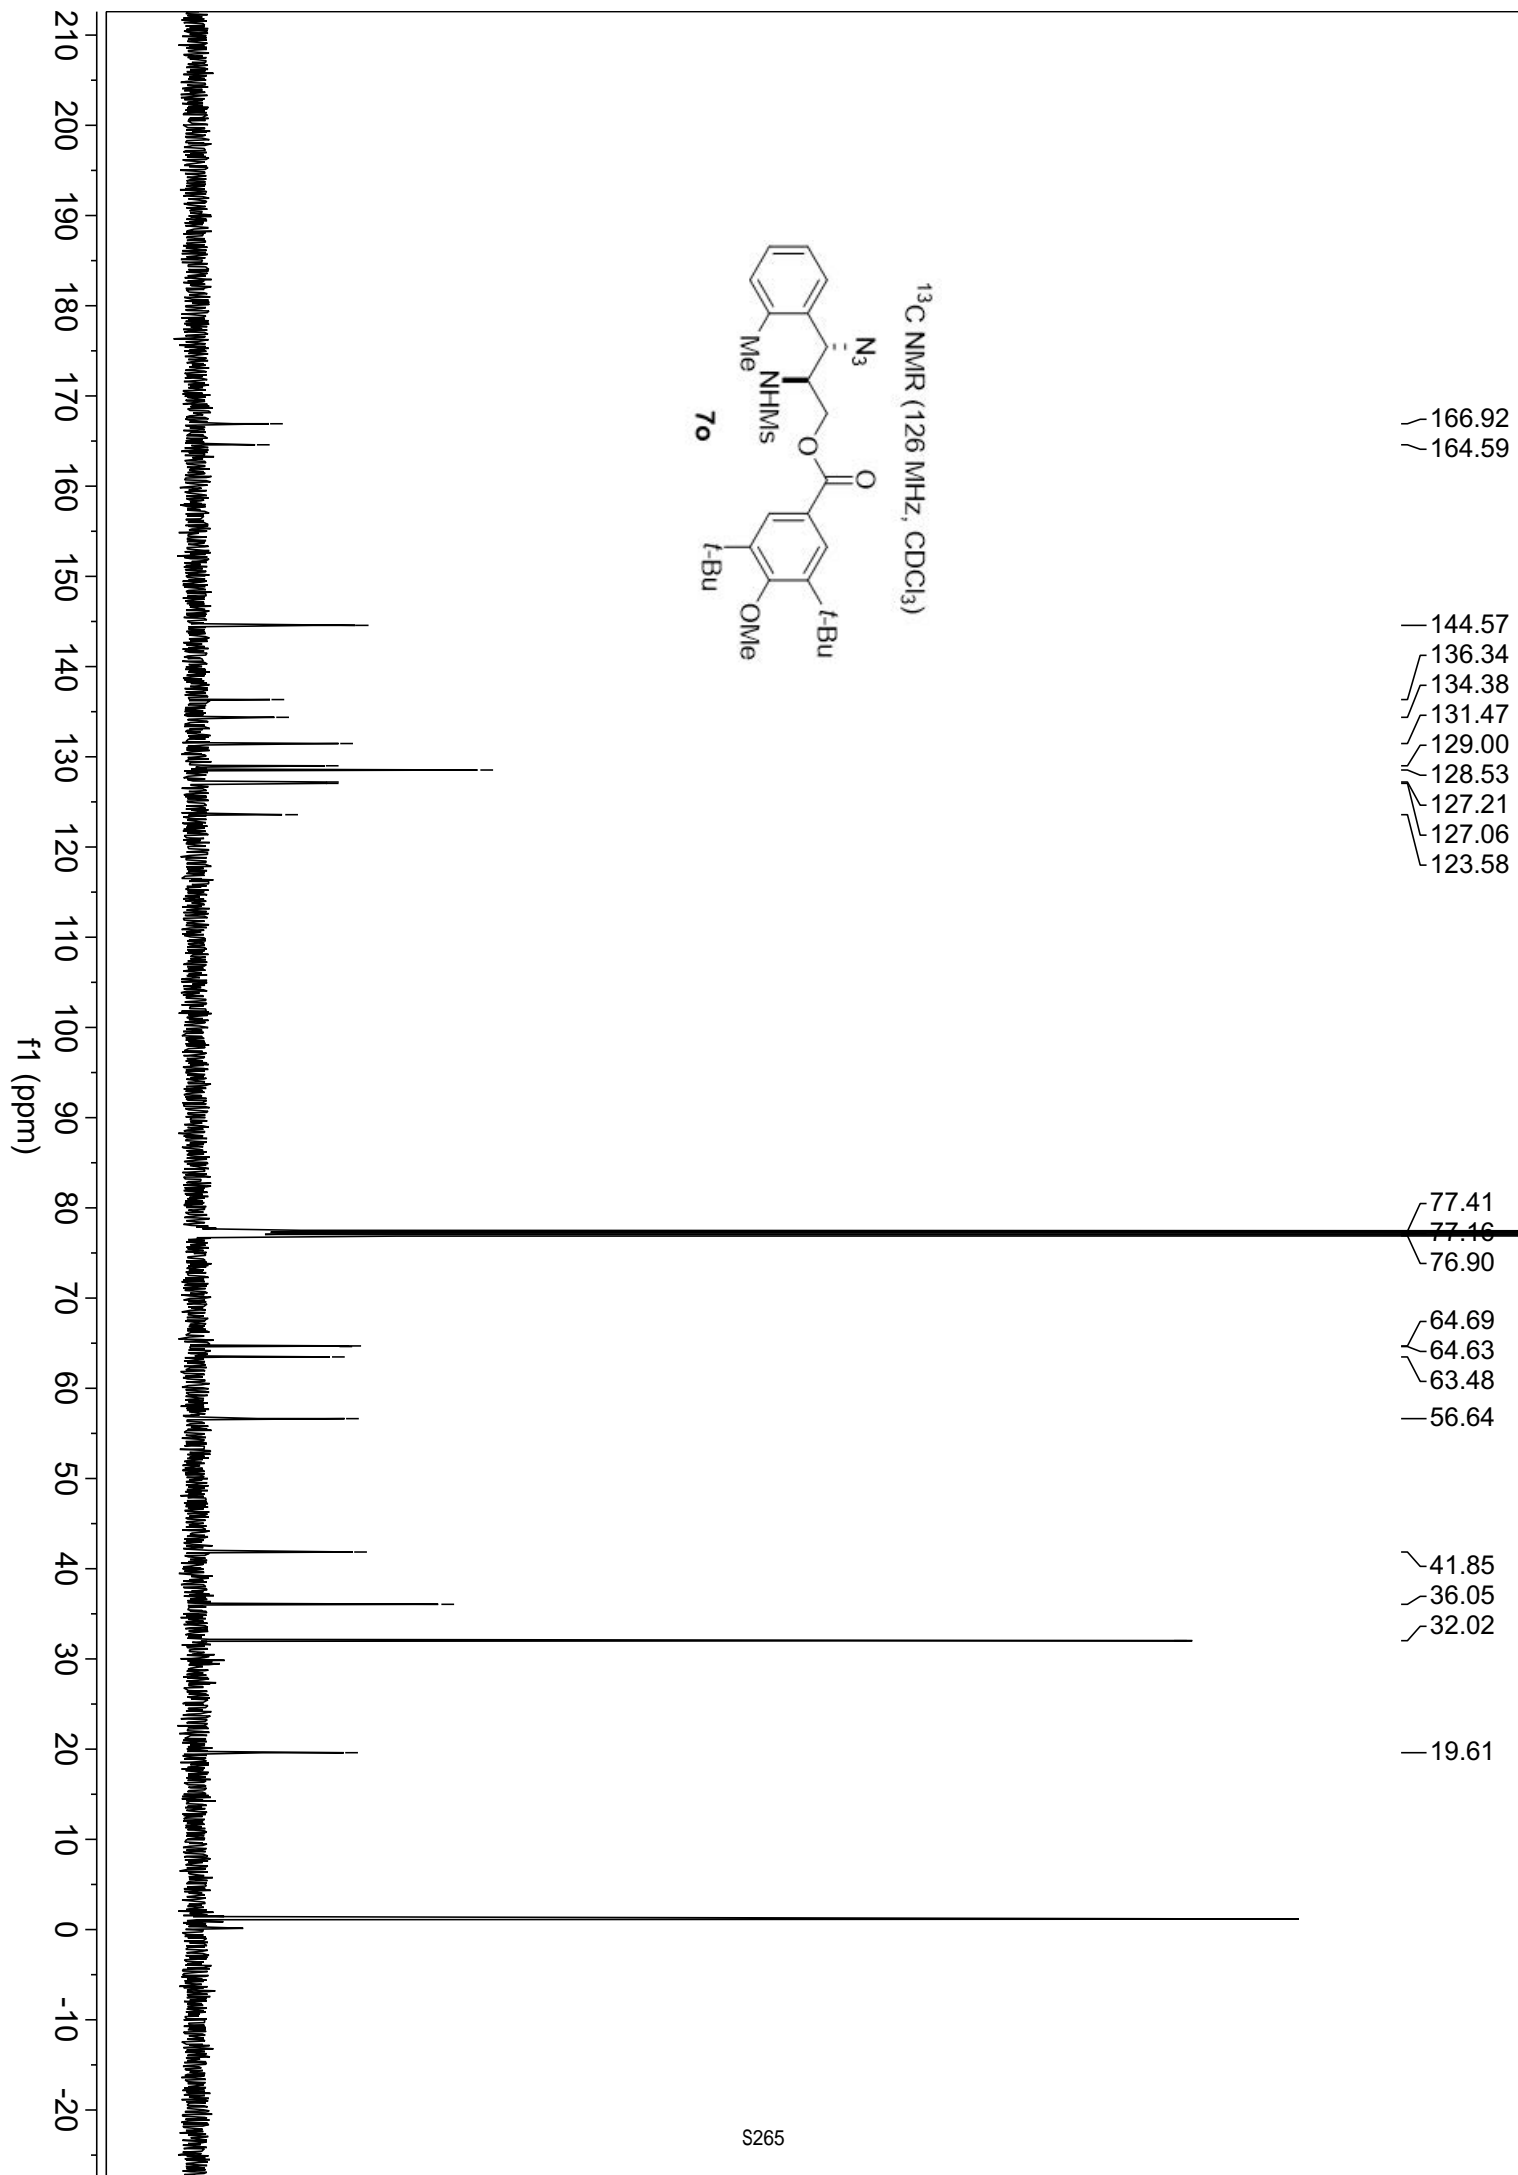

Compound **2a**:

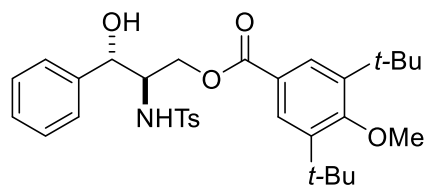

Chiralpak IC, *i*PrOH/Hexane = 20/80, 1.0 mL/min

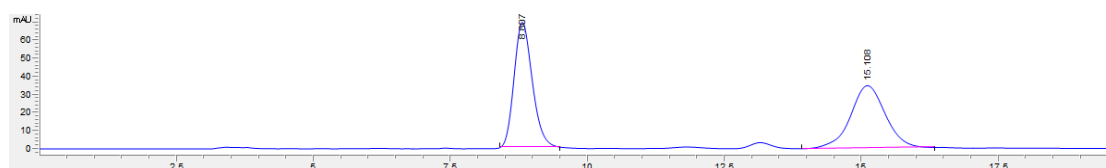

| Peak # | RetTime [min] | Type | Width [min] | Area [mAU*s] | Height [mAU] | Area %  |
|--------|---------------|------|-------------|--------------|--------------|---------|
| 1      | 8.807         | MM R | 0.3829      | 1602.85986   | 69.76615     | 50.9008 |
| 2      | 15.108        | BB   | 0.6772      | 1546.12769   | 34.87431     | 49.0992 |

Totals :                                  3148.98755    104.64046

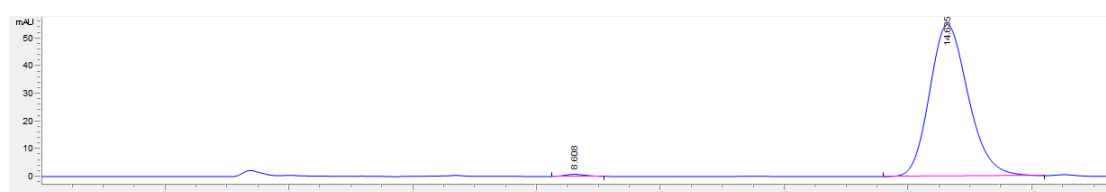

| Peak # | RetTime [min] | Type | Width [min] | Area [mAU*s] | Height [mAU] | Area %  |
|--------|---------------|------|-------------|--------------|--------------|---------|
| 1      | 8.608         | MM R | 0.4018      | 19.05537     | 7.90332e-1   | 0.7967  |
| 2      | 14.635        | BB   | 0.6700      | 2372.72900   | 54.70846     | 99.2033 |

Totals :                                  2391.78437    55.49879

Compound **3a**:

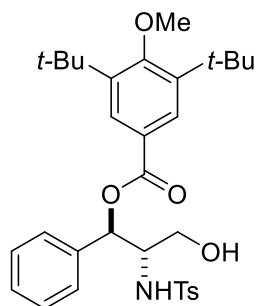

Chiralpak IA, *i*PrOH/Hexane = 20/80, 1.0 mL/min

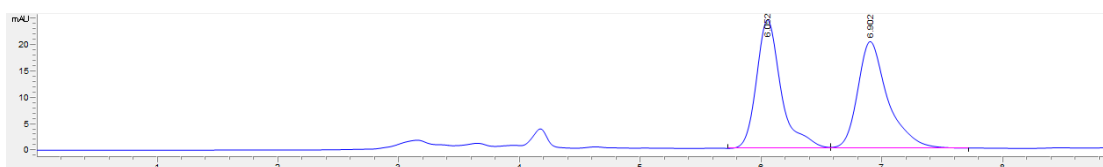

| Peak #   | RetTime [min] | Type | Width [min] | Area [mAU*s] | Height [mAU] | Area %  |
|----------|---------------|------|-------------|--------------|--------------|---------|
| 1        | 6.052         | BV   | 0.2153      | 341.97998    | 24.14239     | 49.6136 |
| 2        | 6.902         | VB   | 0.2561      | 347.30679    | 20.04868     | 50.3864 |
| Totals : |               |      |             | 689.28677    | 44.19106     |         |

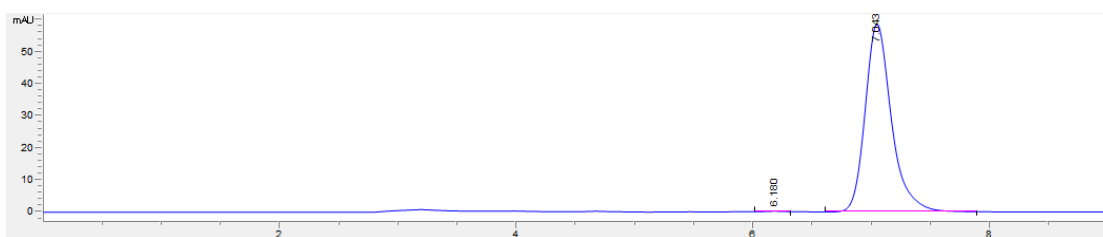

| Peak #   | RetTime [min] | Type | Width [min] | Area [mAU*s] | Height [mAU] | Area %  |
|----------|---------------|------|-------------|--------------|--------------|---------|
| 1        | 6.180         | MM R | 0.1700      | 1.45771      | 1.42940e-1   | 0.1603  |
| 2        | 7.043         | MF R | 0.2579      | 907.68402    | 58.66216     | 99.8397 |
| Totals : |               |      |             | 909.14173    | 58.80510     |         |

Compound **2b**:

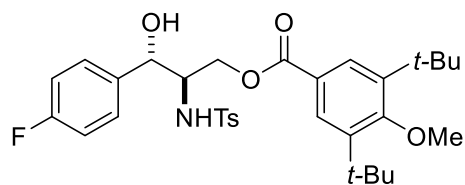

Chiralpak IC, *i*PrOH/Hexane = 20/80, 1.0 mL/min

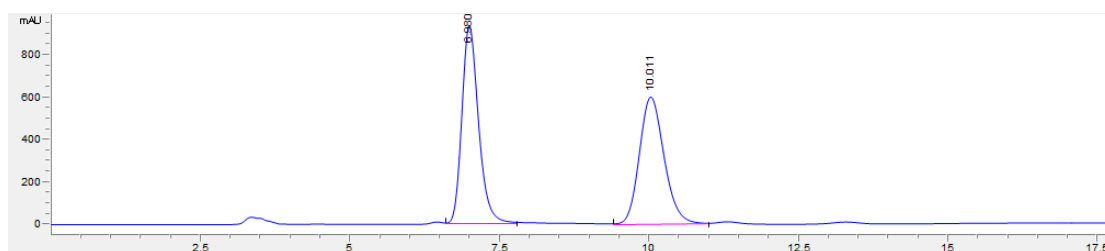

| Peak # | RetTime [min] | Type | Width [min] | Area [mAU*s] | Height [mAU] | Area %  |
|--------|---------------|------|-------------|--------------|--------------|---------|
| 1      | 6.980         | FM R | 0.3261      | 1.84061e4    | 940.71783    | 50.8784 |
| 2      | 10.011        | MM R | 0.4873      | 1.77706e4    | 607.75818    | 49.1216 |

Totals : 3.61767e4 1548.47601

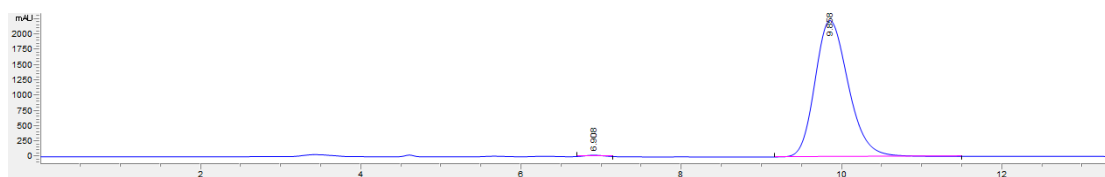

| Peak # | RetTime [min] | Type | Width [min] | Area [mAU*s] | Height [mAU] | Area %  |
|--------|---------------|------|-------------|--------------|--------------|---------|
| 1      | 6.908         | MM R | 0.2603      | 358.21182    | 22.93793     | 0.5482  |
| 2      | 9.858         | MM R | 0.4839      | 6.49835e4    | 2238.01416   | 99.4518 |

Totals : 6.53417e4 2260.95209

Compound **3b**:

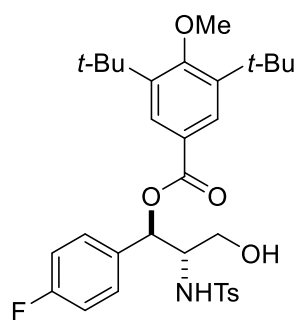

Chiralpak IA, *i*PrOH/Hexane = 20/80, 1.0 mL/min

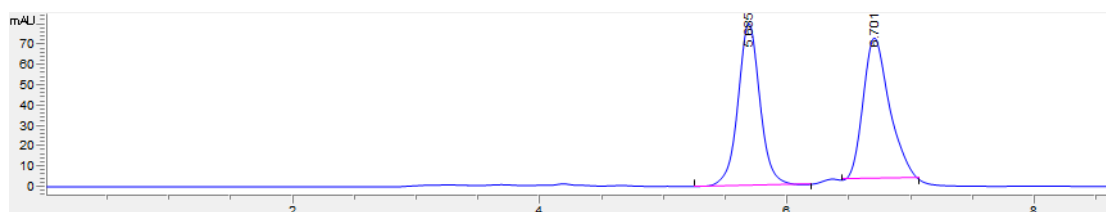

| Peak # | RetTime [min] | Type | Width [min] | Area [mAU*s] | Height [mAU] | Area %  |
|--------|---------------|------|-------------|--------------|--------------|---------|
| 1      | 5.685         | MM   | 0.2065      | 998.49133    | 80.59957     | 49.0684 |
| 2      | 6.701         | MM   | 0.2463      | 1036.40369   | 70.13245     | 50.9316 |

Totals : 2034.89502 150.73202

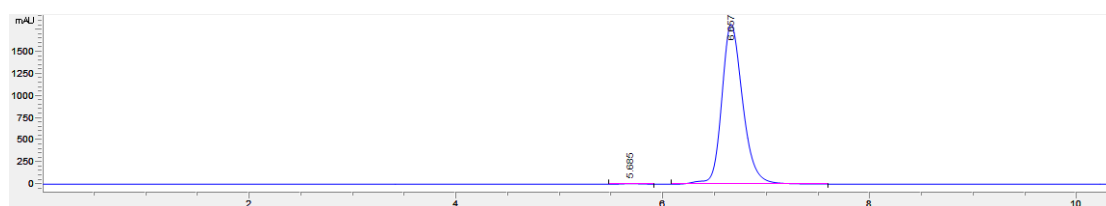

| Peak # | RetTime [min] | Type | Width [min] | Area [mAU*s] | Height [mAU] | Area %  |
|--------|---------------|------|-------------|--------------|--------------|---------|
| 1      | 5.685         | MM R | 0.2113      | 89.34837     | 7.04694      | 0.3461  |
| 2      | 6.657         | MF R | 0.2357      | 2.57269e4    | 1819.35278   | 99.6539 |

Totals : 2.58162e4 1826.39972

Compound **2c**:

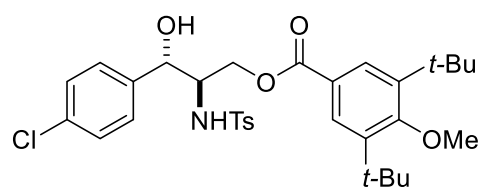

Chiralpak IC, *i*PrOH/Hexane = 20/80, 1.0 mL/min

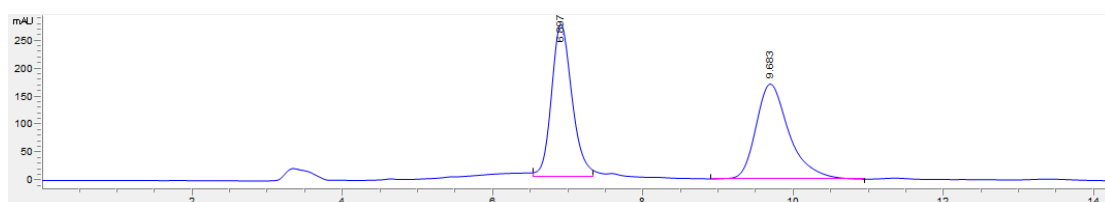

| Peak # | RetTime [min] | Type | Width [min] | Area [mAU*s] | Height [mAU] | Area %  |
|--------|---------------|------|-------------|--------------|--------------|---------|
| 1      | 6.897         | MM R | 0.3165      | 5213.65869   | 274.55743    | 49.3348 |
| 2      | 9.683         | MF R | 0.5196      | 5354.25537   | 171.73506    | 50.6652 |

Totals : 1.05679e4 446.29250

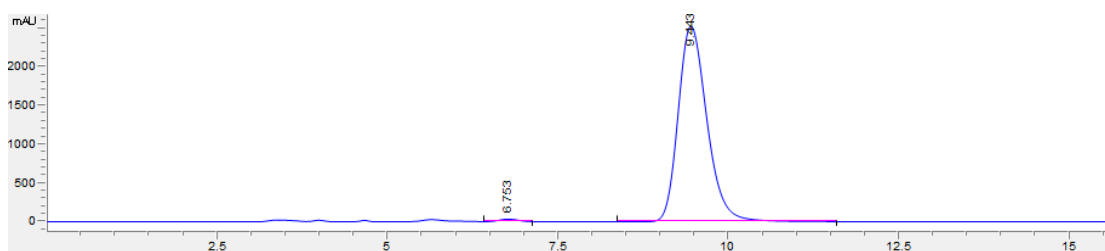

| Peak # | RetTime [min] | Type | Width [min] | Area [mAU*s] | Height [mAU] | Area %  |
|--------|---------------|------|-------------|--------------|--------------|---------|
| 1      | 6.753         | MF R | 0.3461      | 684.64111    | 32.96690     | 0.9056  |
| 2      | 9.443         | MF R | 0.4899      | 7.49177e4    | 2548.73877   | 99.0944 |

Totals : 7.56023e4 2581.70567

Compound **3c**:

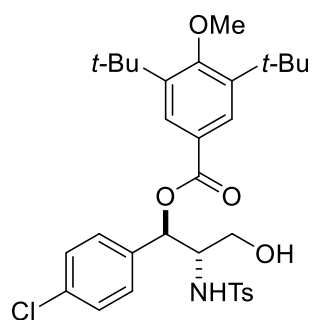

Chiralpak IA, *i*PrOH/Hexane = 20/80, 1.0 mL/min

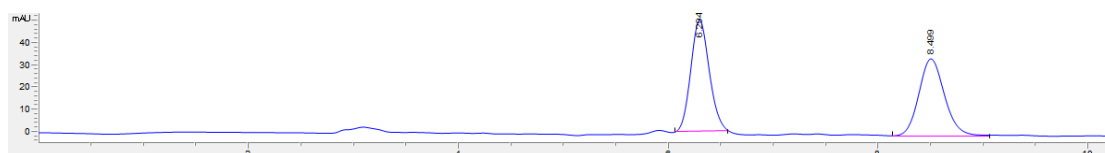

| Peak # | RetTime [min] | Type | Width [min] | Area [mAU*s] | Height [mAU] | Area %  |
|--------|---------------|------|-------------|--------------|--------------|---------|
| 1      | 6.294         | MM R | 0.2049      | 621.72211    | 50.57968     | 50.6350 |
| 2      | 8.499         | MM R | 0.2880      | 606.12854    | 35.07695     | 49.3650 |

Totals : 1227.85065 85.65664

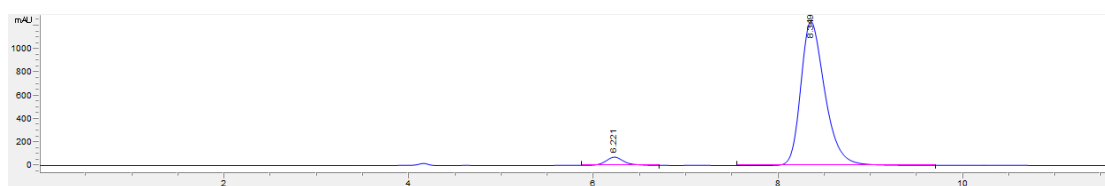

| Peak # | RetTime [min] | Type | Width [min] | Area [mAU*s] | Height [mAU] | Area %  |
|--------|---------------|------|-------------|--------------|--------------|---------|
| 1      | 6.221         | MM R | 0.2321      | 983.17719    | 70.58511     | 4.2390  |
| 2      | 8.349         | BB   | 0.2774      | 2.22104e4    | 1226.01746   | 95.7610 |

Totals : 2.31935e4 1296.60256

Compound **2d**:

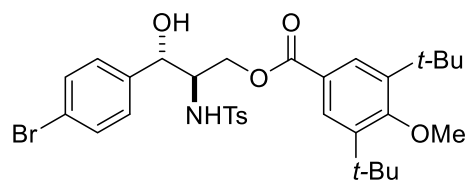

Chiralpak IC, *i*PrOH/Hexane = 20/80, 1.0 mL/min

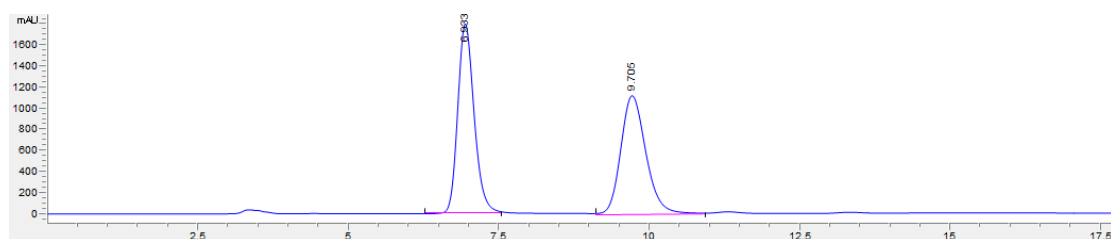

| Peak # | RetTime [min] | Type | Width [min] | Area [mAU*s] | Height [mAU] | Area %  |
|--------|---------------|------|-------------|--------------|--------------|---------|
| 1      | 6.933         | MF R | 0.3166      | 3.41847e4    | 1799.46143   | 50.5877 |
| 2      | 9.705         | MM R | 0.4908      | 3.33905e4    | 1133.92578   | 49.4123 |

Totals : 6.75751e4 2933.38721

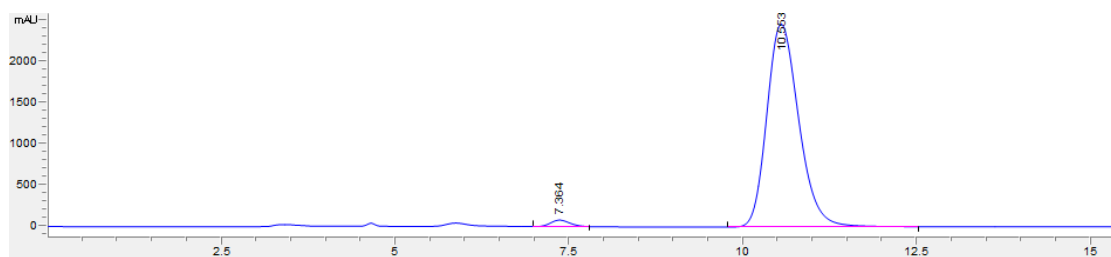

| Peak # | RetTime [min] | Type | Width [min] | Area [mAU*s] | Height [mAU] | Area %  |
|--------|---------------|------|-------------|--------------|--------------|---------|
| 1      | 7.364         | MM R | 0.3415      | 1696.73621   | 82.80674     | 2.1070  |
| 2      | 10.553        | MF R | 0.5331      | 7.88306e4    | 2464.54736   | 97.8930 |

Totals : 8.05273e4 2547.35410



Compound **3d**:

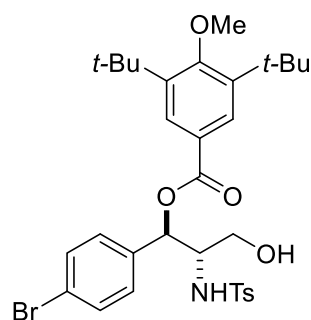

Chiralpak IA, *i*PrOH/Hexane = 20/80, 1.0 mL/min

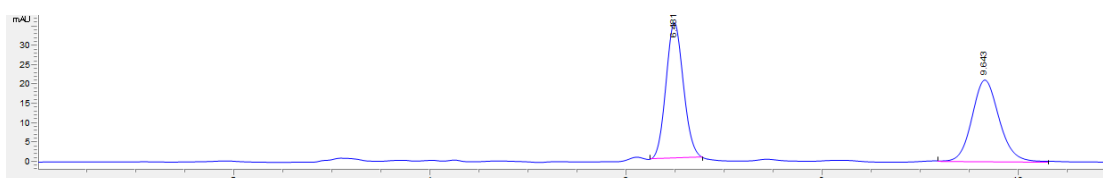

| Peak # | RetTime [min] | Type | Width [min] | Area [mAU*s] | Height [mAU] | Area %  |
|--------|---------------|------|-------------|--------------|--------------|---------|
| 1      | 6.481         | MM R | 0.2047      | 434.26111    | 35.36588     | 50.5117 |
| 2      | 9.643         | MM R | 0.3298      | 425.46191    | 21.50341     | 49.4883 |

Totals :                                  859.72302     56.86929

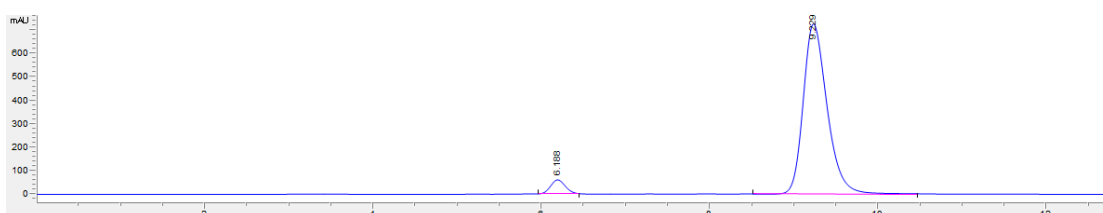

| Peak # | RetTime [min] | Type | Width [min] | Area [mAU*s] | Height [mAU] | Area %  |
|--------|---------------|------|-------------|--------------|--------------|---------|
| 1      | 6.188         | MM R | 0.2034      | 729.94379    | 59.82199     | 4.7940  |
| 2      | 9.229         | MF R | 0.3325      | 1.44961e4    | 726.58221    | 95.2060 |

Totals :                                  1.52261e4     786.40421

Compound **2e**:

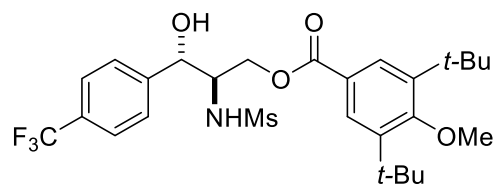

Chiralpak IC, *i*PrOH/Hexane = 20/80, 1.0 mL/min

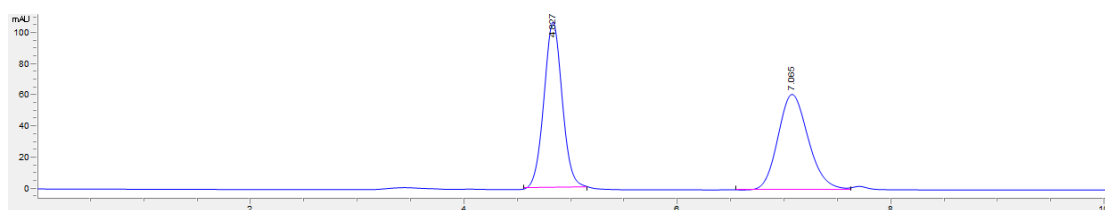

| Peak # | RetTime [min] | Type | Width [min] | Area [mAU*s] | Height [mAU] | Area %  |
|--------|---------------|------|-------------|--------------|--------------|---------|
| 1      | 4.827         | MM R | 0.1971      | 1250.79077   | 105.76311    | 50.7677 |
| 2      | 7.065         | FM R | 0.3309      | 1212.96191   | 61.09485     | 49.2323 |

Totals : 2463.75269 166.85796

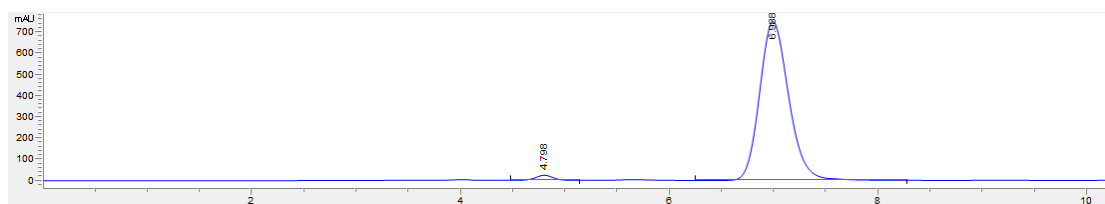

| Peak # | RetTime [min] | Type | Width [min] | Area [mAU*s] | Height [mAU] | Area %  |
|--------|---------------|------|-------------|--------------|--------------|---------|
| 1      | 4.798         | MF R | 0.1960      | 281.86700    | 23.96583     | 1.9013  |
| 2      | 6.988         | MF R | 0.3235      | 1.45428e4    | 749.24493    | 98.0987 |

Totals : 1.48247e4 773.21076

Compound **3e**:

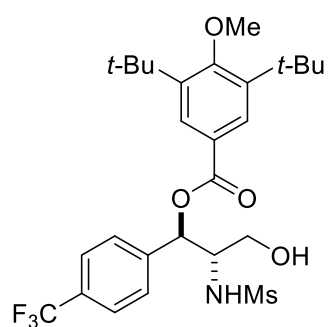

Chiralpak IA, *i*PrOH/Hexane = 20/80, 1.0 mL/min

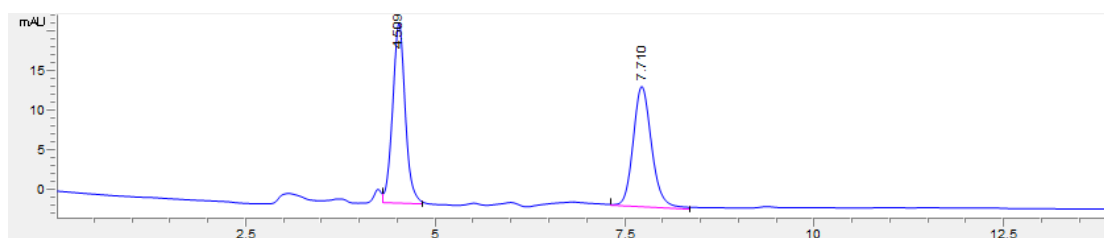

| Peak #   | RetTime [min] | Type | Width [min] | Area [mAU*s] | Height [mAU] | Area %  |
|----------|---------------|------|-------------|--------------|--------------|---------|
| 1        | 4.509         | MF R | 0.1939      | 264.78845    | 22.75652     | 50.3960 |
| 2        | 7.710         | MM R | 0.2856      | 260.62708    | 15.20796     | 49.6040 |
| Totals : |               |      |             | 525.41553    | 37.96447     |         |

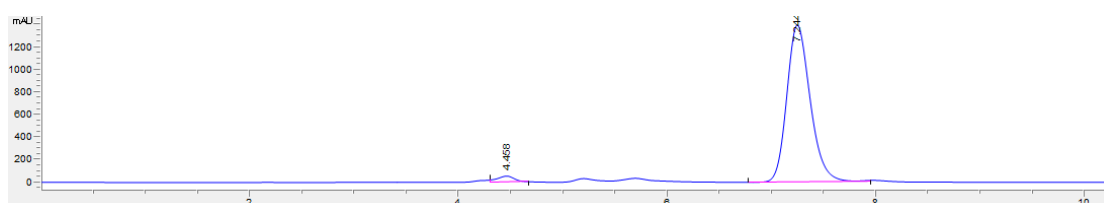

| Peak #   | RetTime [min] | Type | Width [min] | Area [mAU*s] | Height [mAU] | Area %  |
|----------|---------------|------|-------------|--------------|--------------|---------|
| 1        | 4.458         | MF R | 0.1979      | 656.07269    | 55.26131     | 2.8734  |
| 2        | 7.244         | MM R | 0.2621      | 2.21768e4    | 1410.46582   | 97.1266 |
| Totals : |               |      |             | 2.28328e4    | 1465.72713   |         |

Compound **2f**:

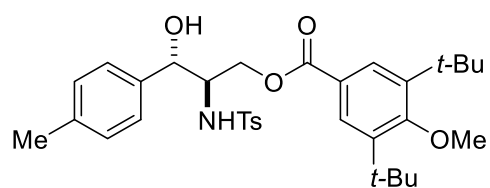

Chiralpak IC, *i*PrOH/Hexane = 20/80, 1.0 mL/min

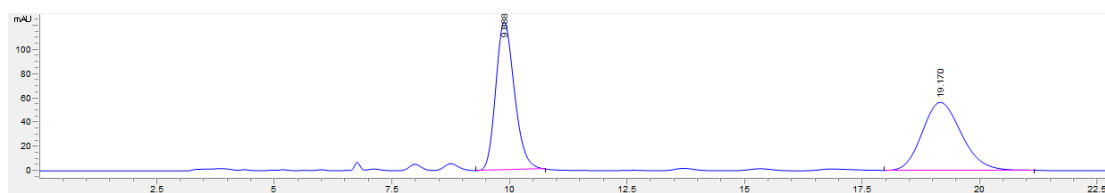

| Peak # | RetTime [min] | Type | Width [min] | Area [mAU*s] | Height [mAU] | Area %  |
|--------|---------------|------|-------------|--------------|--------------|---------|
| 1      | 9.888         | MM R | 0.4626      | 3401.70117   | 122.56147    | 50.9065 |
| 2      | 19.170        | MF R | 0.9723      | 3280.55762   | 56.23174     | 49.0935 |

Totals : 6682.25879 178.79321

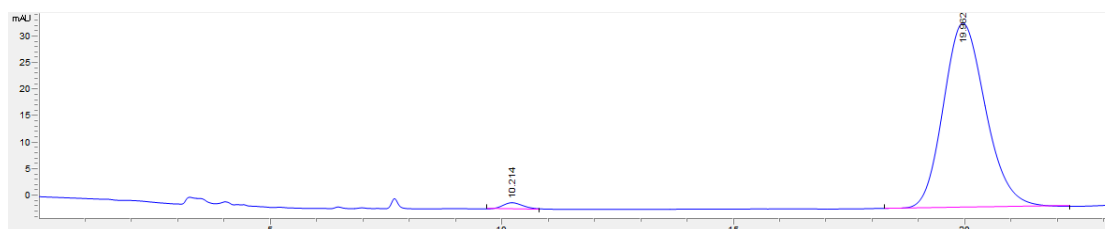

| Peak # | RetTime [min] | Type | Width [min] | Area [mAU*s] | Height [mAU] | Area %  |
|--------|---------------|------|-------------|--------------|--------------|---------|
| 1      | 10.214        | MF R | 0.5198      | 37.98239     | 1.21783      | 1.6891  |
| 2      | 19.962        | FM R | 1.0581      | 2210.63550   | 34.82085     | 98.3109 |

Totals : 2248.61789 36.03868

Compound **3f**:

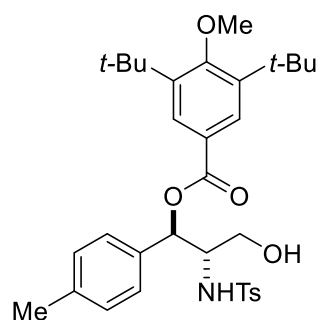

Chiralpak IA, *i*PrOH/Hexane = 20/80, 1.0 mL/min

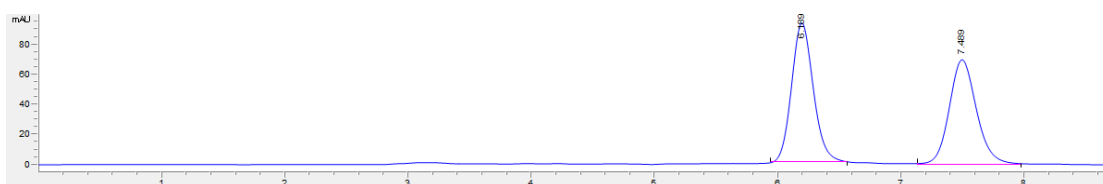

| Peak # | RetTime [min] | Type | Width [min] | Area [mAU*s] | Height [mAU] | Area %  |
|--------|---------------|------|-------------|--------------|--------------|---------|
| 1      | 6.189         | MM R | 0.2037      | 1140.98291   | 93.36403     | 50.9726 |
| 2      | 7.489         | MM R | 0.2589      | 1097.44055   | 70.64773     | 49.0274 |

Totals : 2238.42346 164.01176

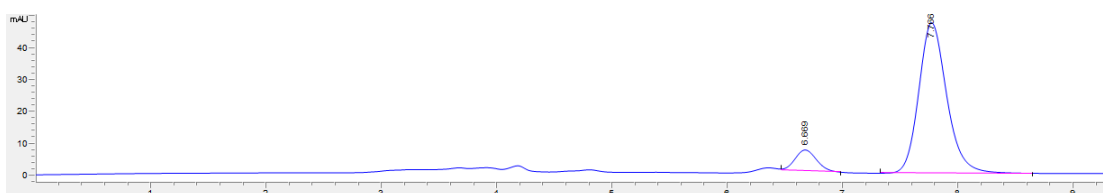

| Peak # | RetTime [min] | Type | Width [min] | Area [mAU*s] | Height [mAU] | Area %  |
|--------|---------------|------|-------------|--------------|--------------|---------|
| 1      | 6.669         | MM R | 0.2148      | 84.76167     | 6.57687      | 9.5695  |
| 2      | 7.766         | MF R | 0.2816      | 800.98346    | 47.40048     | 90.4305 |

Totals : 885.74513 53.97735

Compound **2g**:

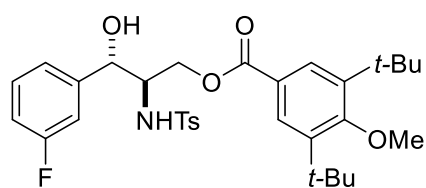

Chiralpak IC, *i*PrOH/Hexane = 20/80, 1.0 mL/min

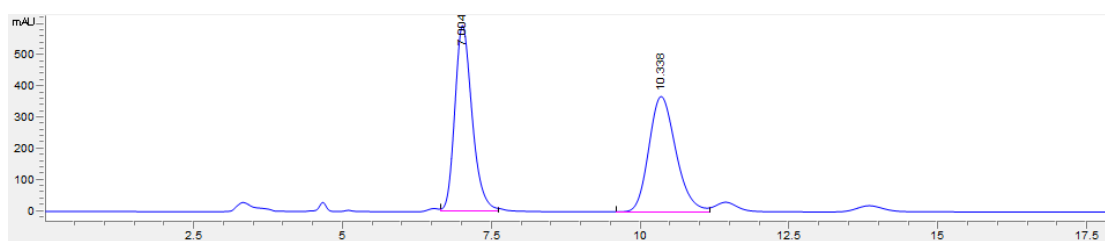

| Peak # | RetTime [min] | Type | Height [min] | Area [mAU*s] | Height [mAU] | Area %  |
|--------|---------------|------|--------------|--------------|--------------|---------|
| 1      | 7.004         | MF R | 0.3392       | 1.21819e4    | 598.59100    | 50.3257 |
| 2      | 10.338        | MF R | 0.5362       | 1.20242e4    | 373.76852    | 49.6743 |

Totals : 2.42061e4 972.35953

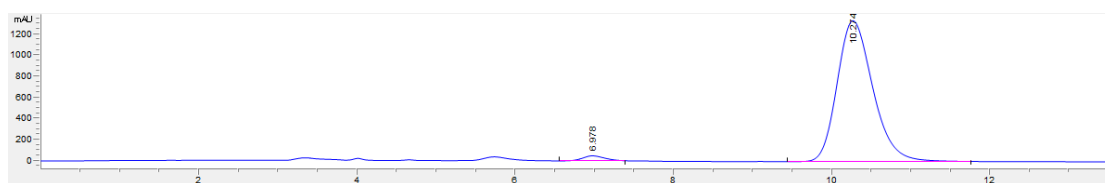

| Peak # | RetTime [min] | Type | Width [min] | Area [mAU*s] | Height [mAU] | Area %  |
|--------|---------------|------|-------------|--------------|--------------|---------|
| 1      | 6.978         | MF R | 0.3487      | 1039.46301   | 49.68423     | 2.4292  |
| 2      | 10.274        | MF R | 0.5236      | 4.17510e4    | 1328.88831   | 97.5708 |

Totals : 4.27904e4 1378.57253

Compound **3g**:

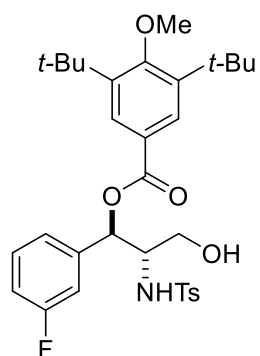

Chiralpak IA, *i*PrOH/Hexane = 20/80, 1.0 mL/min

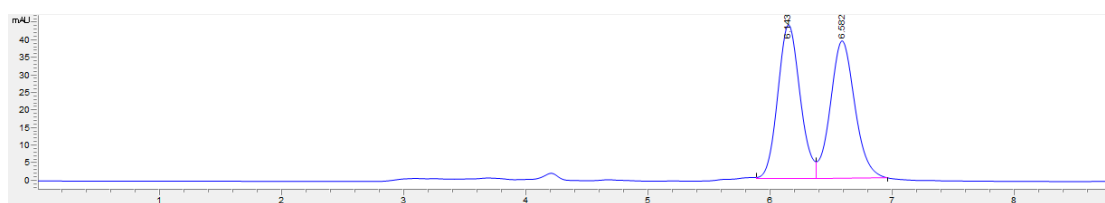

| Peak # | RetTime [min] | Type | Width [min] | Area [mAU*s] | Height [mAU] | Area %  |
|--------|---------------|------|-------------|--------------|--------------|---------|
| 1      | 6.143         | MF R | 0.2133      | 568.02673    | 44.38020     | 50.6849 |
| 2      | 6.582         | FM R | 0.2322      | 552.67633    | 39.66575     | 49.3151 |

Totals : 1120.70306 84.04596

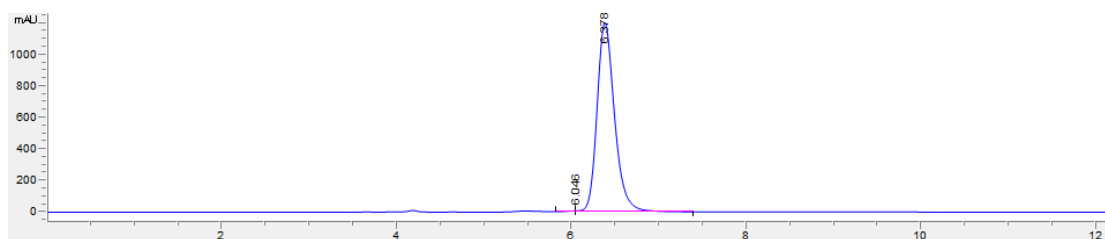

| Peak # | RetTime [min] | Type | Width [min] | Area [mAU*s] | Height [mAU] | Area %  |
|--------|---------------|------|-------------|--------------|--------------|---------|
| 1      | 6.046         | MF   | 0.1452      | 68.14751     | 7.82430      | 0.4044  |
| 2      | 6.378         | MF R | 0.2332      | 1.67829e4    | 1199.55737   | 99.5956 |

Totals : 1.68511e4 1207.38167

Compound **2h**:

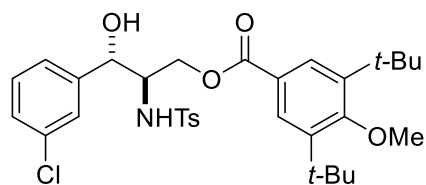

Chiralpak IC, *i*PrOH/Hexane = 20/80, 1.0 mL/min

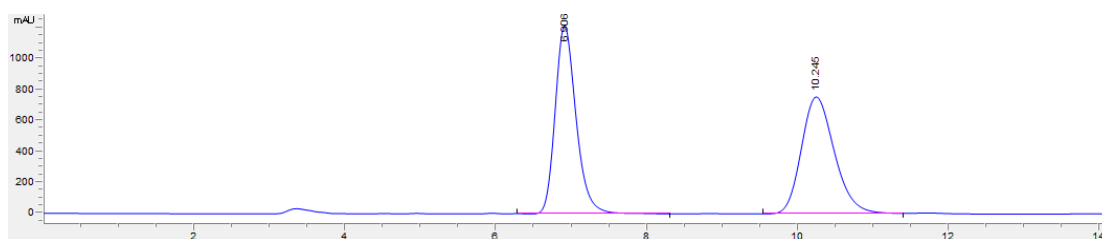

| Peak # | RetTime [min] | Type | Width [min] | Area [mAU*s] | Height [mAU] | Area %  |
|--------|---------------|------|-------------|--------------|--------------|---------|
| 1      | 6.906         | FM R | 0.3209      | 2.36341e4    | 1227.51721   | 50.2986 |
| 2      | 10.245        | MF R | 0.5103      | 2.33534e4    | 762.69672    | 49.7014 |

Totals : 4.69875e4 1990.21393

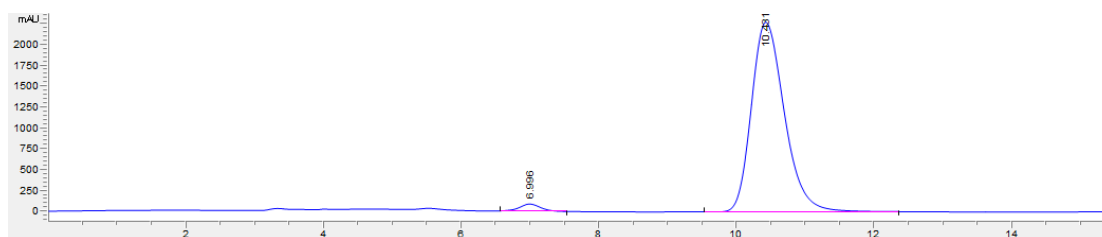

| Peak # | RetTime [min] | Type | Width [min] | Area [mAU*s] | Height [mAU] | Area %  |
|--------|---------------|------|-------------|--------------|--------------|---------|
| 1      | 6.996         | FM R | 0.3638      | 1898.31714   | 86.97021     | 2.4513  |
| 2      | 10.431        | MF R | 0.5561      | 7.55433e4    | 2263.94189   | 97.5487 |

Totals : 7.74416e4 2350.91210



Compound **3h**:

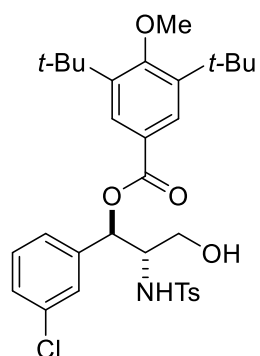

Chiralpak IA, *i*PrOH/Hexane = 20/80, 1.0 mL/min

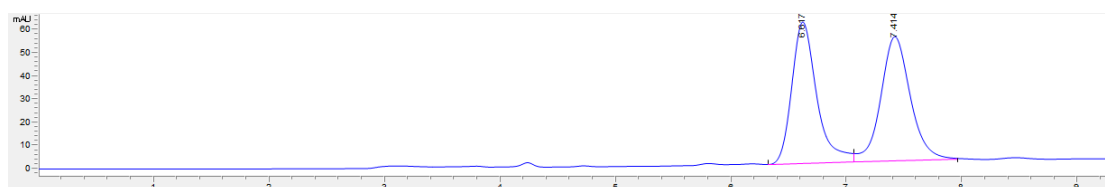

| Peak # | RetTime [min] | Type | Width [min] | Area [mAU*s] | Height [mAU] | Area %  |
|--------|---------------|------|-------------|--------------|--------------|---------|
| 1      | 6.617         | MF R | 0.2529      | 930.56903    | 61.33197     | 49.0254 |
| 2      | 7.414         | FM R | 0.2991      | 967.56915    | 53.92348     | 50.9746 |

Totals : 1898.13818 115.25546

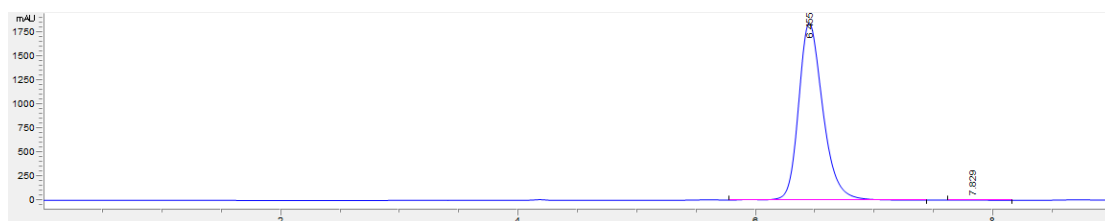

| Peak # | RetTime [min] | Type | Width [min] | Area [mAU*s] | Height [mAU] | Area %  |
|--------|---------------|------|-------------|--------------|--------------|---------|
| 1      | 6.455         | FM R | 0.2395      | 2.65726e4    | 1849.03894   | 99.9272 |
| 2      | 7.829         | FM R | 0.2238      | 19.36249     | 1.44171      | 0.0728  |

Totals : 2.65920e4 1850.48065

Compound **2i**:

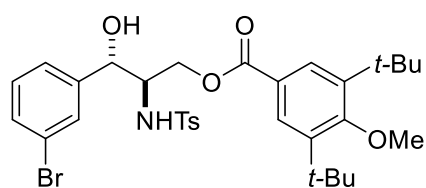

Chiralpak IC, *i*PrOH/Hexane = 20/80, 1.0 mL/min

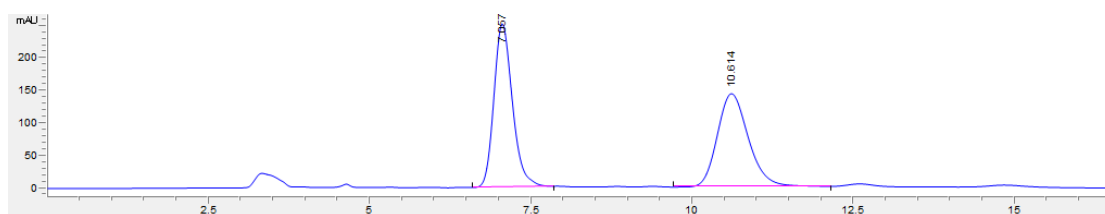

| Peak # | RetTime [min] | Type | Width [min] | Area [mAU*s] | Height [mAU] | Area %  |
|--------|---------------|------|-------------|--------------|--------------|---------|
| 1      | 7.057         | BB   | 0.3069      | 5042.11182   | 252.57060    | 50.6799 |
| 2      | 10.614        | MF R | 0.5660      | 4906.83545   | 144.49379    | 49.3201 |

Totals : 9948.94727 397.06439

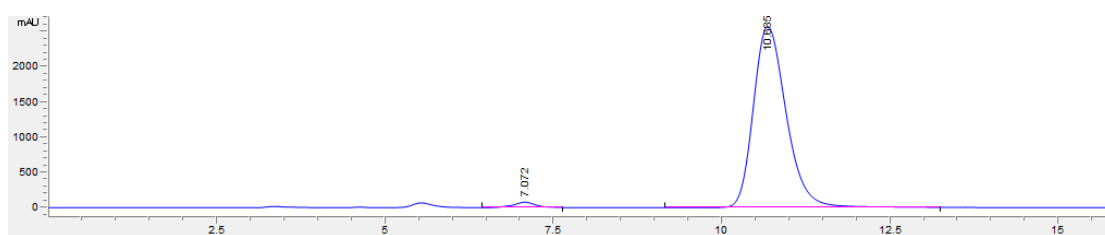

| Peak # | RetTime [min] | Type | Width [min] | Area [mAU*s] | Height [mAU] | Area %  |
|--------|---------------|------|-------------|--------------|--------------|---------|
| 1      | 7.072         | MF R | 0.3949      | 1861.54980   | 78.57459     | 2.0683  |
| 2      | 10.685        | FM R | 0.5683      | 8.81403e4    | 2585.04614   | 97.9317 |

Totals : 9.00018e4 2663.62074

Compound **3i**:

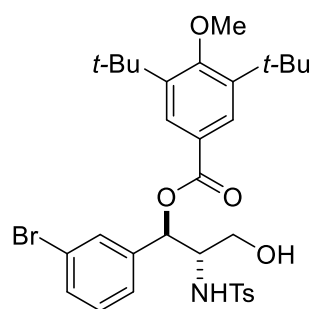

Chiralpak IA, *n*PrOH/Hexane = 20/80, 1.0 mL/min

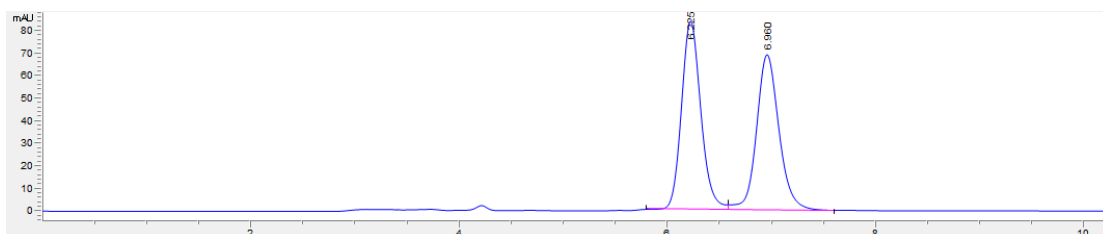

| Peak # | RetTime [min] | Type | Width [min] | Area [mAU*s] | Height [mAU] | Area %  |
|--------|---------------|------|-------------|--------------|--------------|---------|
| 1      | 6.225         | MF R | 0.2158      | 1077.43225   | 83.20871     | 50.9206 |
| 2      | 6.960         | FM R | 0.2519      | 1038.47302   | 68.70959     | 49.0794 |

Totals : 2115.90527 151.91830

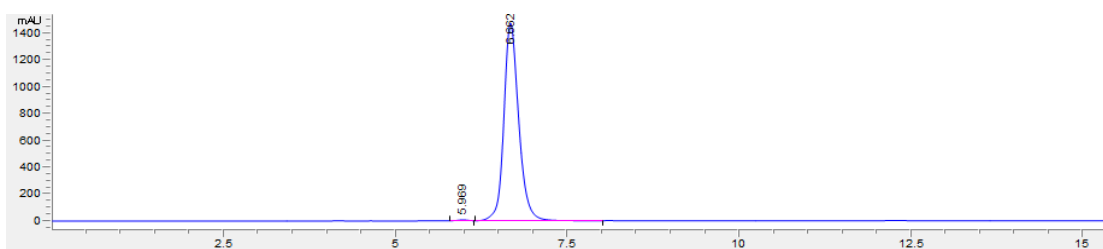

| Peak # | RetTime [min] | Type | Width [min] | Area [mAU*s] | Height [mAU] | Area %  |
|--------|---------------|------|-------------|--------------|--------------|---------|
| 1      | 5.969         | MM R | 0.1718      | 65.55153     | 6.36023      | 0.2957  |
| 2      | 6.662         | MF R | 0.2514      | 2.21025e4    | 1465.26880   | 99.7043 |

Totals : 2.21680e4 1471.62903

Compound **2j**:

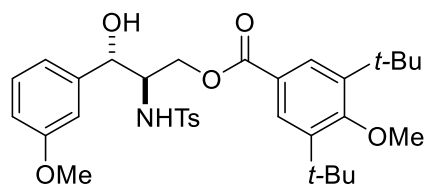

Chiralpak IA, *i*PrOH/Hexane = 20/80, 1.0 mL/min

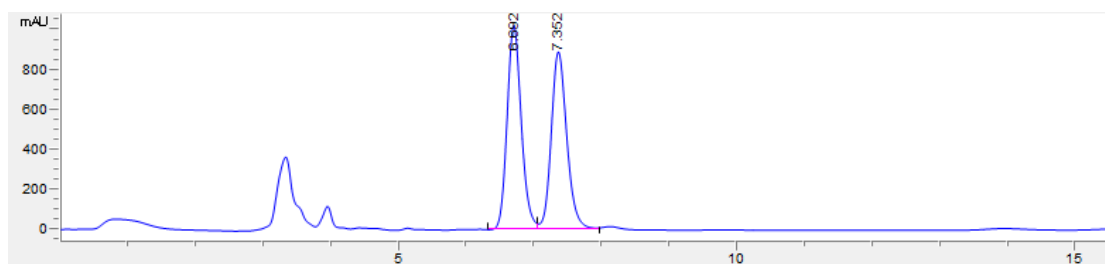

| Peak # | RetTime [min] | Type | Width [min] | Area [mAU*s] | Height [mAU] | Area %  |
|--------|---------------|------|-------------|--------------|--------------|---------|
| 1      | 6.692         | BV   | 0.2245      | 1.50280e4    | 1028.46094   | 50.9800 |
| 2      | 7.352         | MF R | 0.2688      | 1.44502e4    | 895.97119    | 49.0200 |

Totals : 2.94782e4 1924.43213

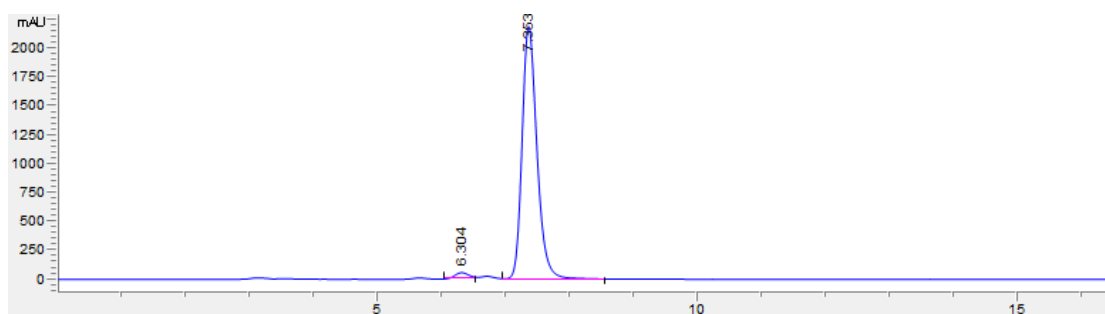

| Peak # | RetTime [min] | Type | Width [min] | Area [mAU*s] | Height [mAU] | Area %  |
|--------|---------------|------|-------------|--------------|--------------|---------|
| 1      | 6.304         | MF R | 0.2625      | 870.78845    | 55.29380     | 2.3937  |
| 2      | 7.563         | MF R | 0.2710      | 3.55076e4    | 2183.95093   | 97.6063 |

Totals : 3.63784e4 2239.24472

Compound **3j**:

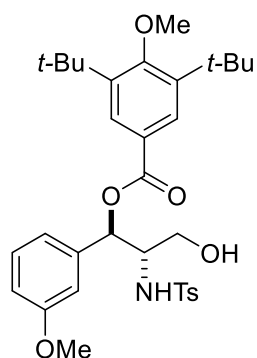

Chiralpak IA, *i*PrOH/Hexane = 20/80, 1.0 mL/min

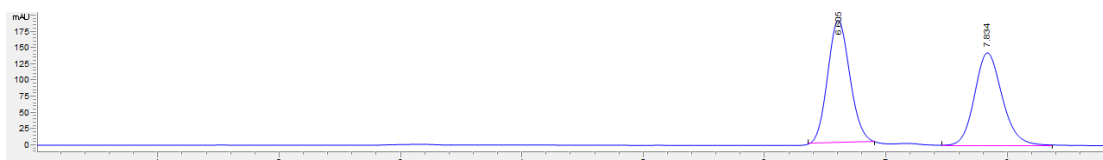

| Peak # | RetTime [min] | Type | Width [min] | Area [mAU*s] | Height [mAU] | Area %  |
|--------|---------------|------|-------------|--------------|--------------|---------|
| 1      | 6.605         | MM R | 0.2116      | 2426.36890   | 191.09245    | 50.6052 |
| 2      | 7.834         | MM R | 0.2703      | 2368.33276   | 146.01662    | 49.3948 |

Totals : 4794.70166 337.10907

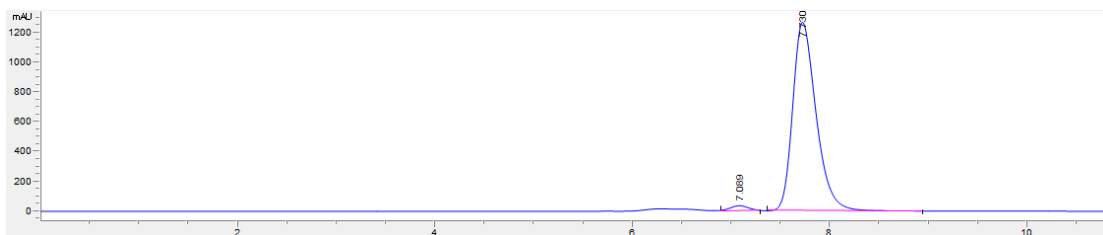

| Peak # | RetTime [min] | Type | Width [min] | Area [mAU*s] | Height [mAU] | Area %  |
|--------|---------------|------|-------------|--------------|--------------|---------|
| 1      | 7.089         | MM R | 0.2267      | 488.74039    | 35.92608     | 2.2775  |
| 2      | 7.730         | MF R | 0.2744      | 2.09704e4    | 1273.89612   | 97.7225 |

Totals : 2.14592e4 1309.82220

Compound **2k**:

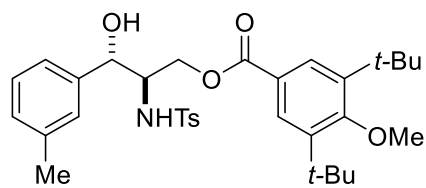

Chiralpak IC, *i*PrOH/Hexane = 20/80, 1.0 mL/min

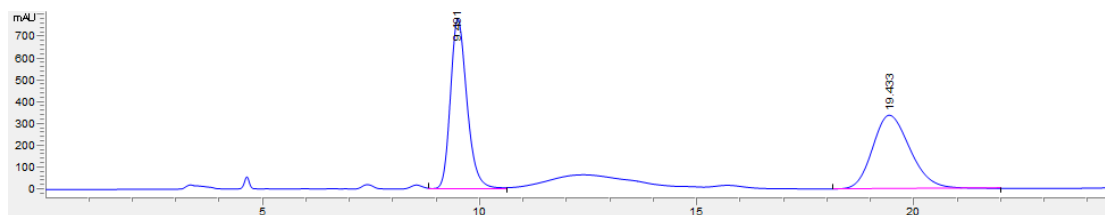

| Peak # | RetTime [min] | Type | Width [min] | Area [mAU*s] | Height [mAU] | Area %  |
|--------|---------------|------|-------------|--------------|--------------|---------|
| 1      | 9.491         | FM R | 0.4437      | 2.06166e4    | 774.47723    | 50.5889 |
| 2      | 19.433        | BB   | 0.9333      | 2.01366e4    | 334.99646    | 49.4111 |

Totals : 4.07532e4 1109.47369

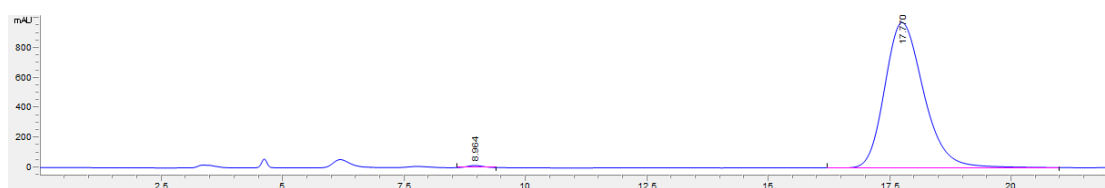

| Peak # | RetTime [min] | Type | Width [min] | Area [mAU*s] | Height [mAU] | Area %  |
|--------|---------------|------|-------------|--------------|--------------|---------|
| 1      | 8.964         | FM R | 0.4274      | 407.10434    | 15.87636     | 0.7395  |
| 2      | 17.770        | MF R | 0.9367      | 5.46457e4    | 972.26208    | 99.2605 |

Totals : 5.50528e4 988.13845

Compound **3k**:

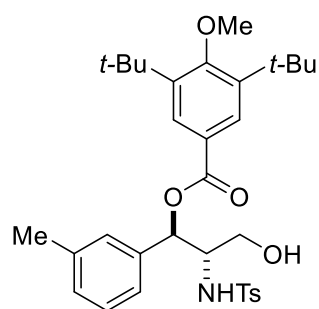

Chiralpak IA, *i*PrOH/Hexane = 20/80, 1.0 mL/min

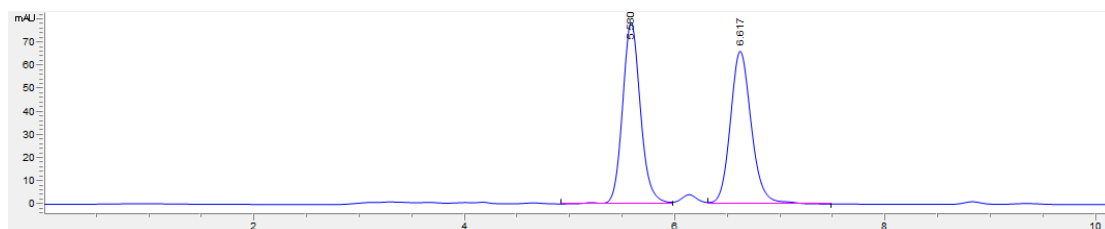

| Peak # | RetTime [min] | Type | Width [min] | Area [mAU*s] | Height [mAU] | Area %  |
|--------|---------------|------|-------------|--------------|--------------|---------|
| 1      | 5.580         | MF R | 0.1987      | 940.54169    | 78.90387     | 50.2820 |
| 2      | 6.617         | MF R | 0.2331      | 929.99109    | 66.48647     | 49.7180 |

Totals :                      1870.53278    145.39034

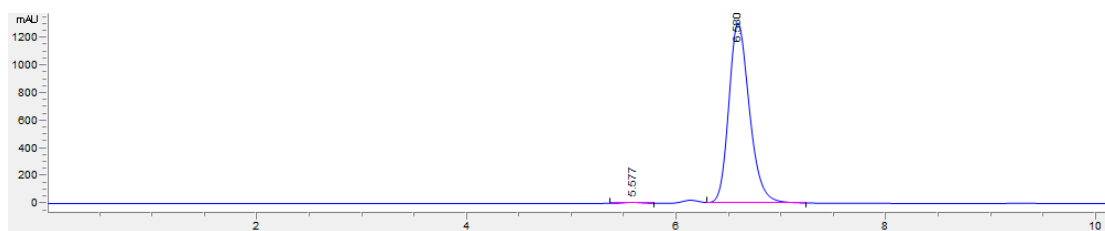

| Peak # | RetTime [min] | Type | Width [min] | Area [mAU*s] | Height [mAU] | Area %  |
|--------|---------------|------|-------------|--------------|--------------|---------|
| 1      | 5.577         | MM R | 0.2099      | 97.20322     | 7.71810      | 0.5433  |
| 2      | 6.580         | MM R | 0.2272      | 1.77937e4    | 1305.50049   | 99.4567 |

Totals :                      1.78909e4    1313.21858

Compound **2I**:

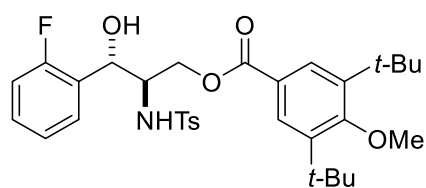

Chiralpak IC, *i*PrOH/Hexane = 20/80, 1.0 mL/min

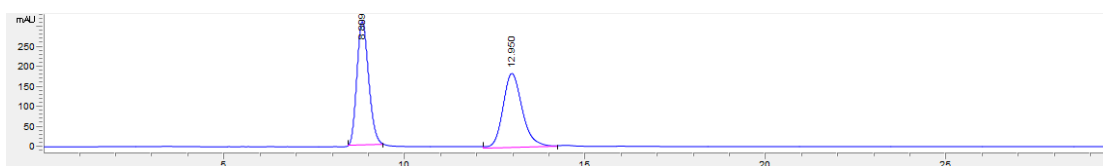

| Peak # | RetTime [min] | Type | Width [min] | Area [mAU*s] | Height [mAU] | Area %  |
|--------|---------------|------|-------------|--------------|--------------|---------|
| 1      | 8.809         | MM R | 0.3797      | 7114.92236   | 312.30789    | 50.6328 |
| 2      | 12.950        | MM R | 0.6205      | 6937.06934   | 186.33340    | 49.3672 |

Totals : 1.40520e4 498.64130

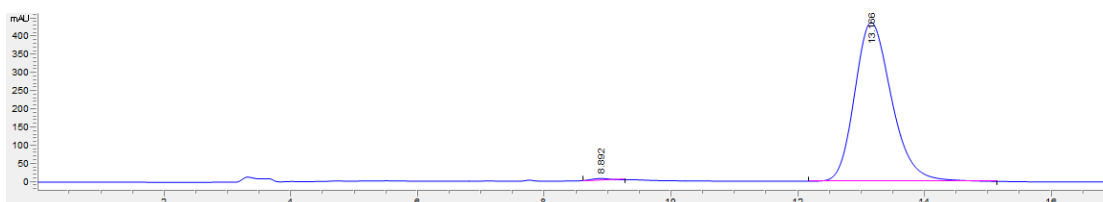

| Peak # | RetTime [min] | Type | Width [min] | Area [mAU*s] | Height [mAU] | Area %  |
|--------|---------------|------|-------------|--------------|--------------|---------|
| 1      | 8.892         | MM R | 0.3654      | 121.12026    | 5.52434      | 0.6728  |
| 2      | 13.166        | MF R | 0.6777      | 1.78822e4    | 439.76587    | 99.3272 |

Totals : 1.80033e4 445.29021



Compound 4I:

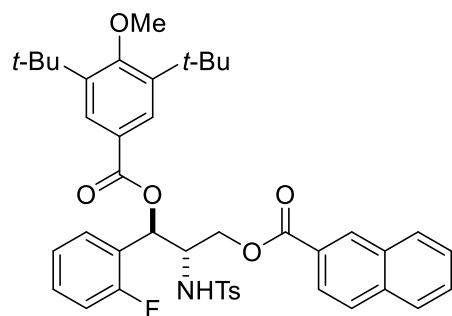

Chiralpak IA, *i*PrOH/Hexane = 20/80, 1.0 mL/min

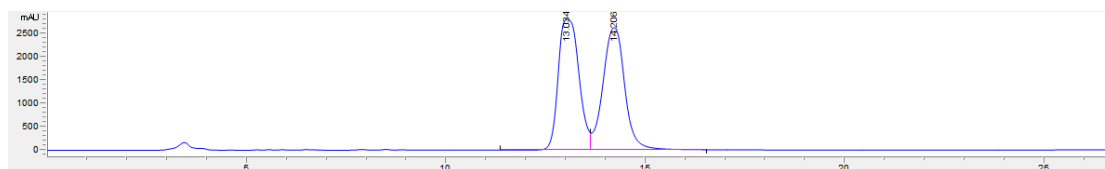

| Peak # | RetTime [min] | Type | Width [min] | Area [mAU*s] | Height [mAU] | Area %  |
|--------|---------------|------|-------------|--------------|--------------|---------|
| 1      | 13.034        | BV   | 0.5710      | 1.01662e5    | 2803.70239   | 50.4099 |
| 2      | 14.206        | MF R | 0.6352      | 1.00008e5    | 2624.11060   | 49.5901 |

Totals : 2.01670e5 5427.81299

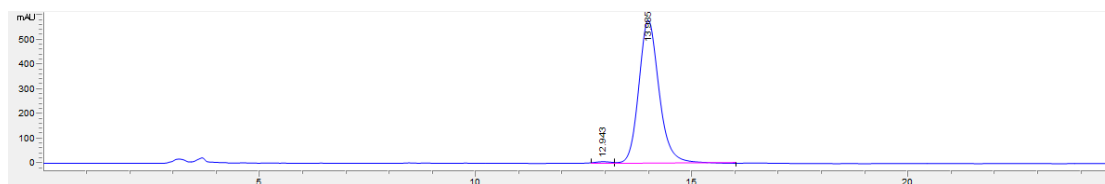

| Peak # | RetTime [min] | Type | Width [min] | Area [mAU*s] | Height [mAU] | Area %  |
|--------|---------------|------|-------------|--------------|--------------|---------|
| 1      | 12.943        | FM R | 0.4254      | 182.38812    | 7.14600      | 0.9468  |
| 2      | 13.985        | MF R | 0.5465      | 1.90816e4    | 581.93658    | 99.0532 |

Totals : 1.92640e4 589.08258

Compound **2m**:

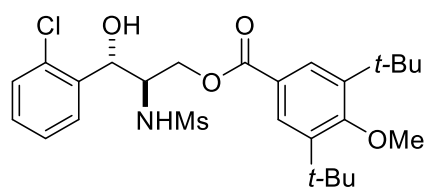

Chiralpak IC, *i*PrOH/Hexane = 20/80, 1.0 mL/min

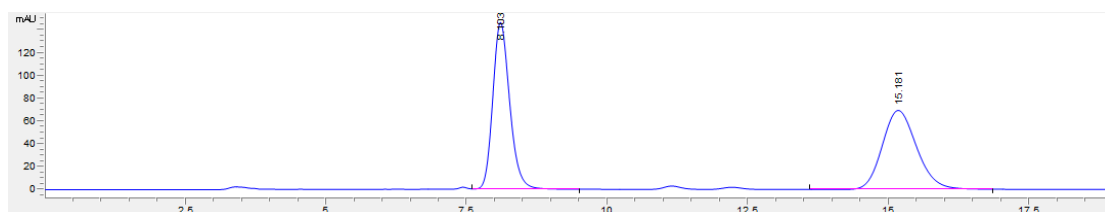

| Peak # | RetTime [min] | Type | Width [min] | Area [mAU*s] | Height [mAU] | Area %  |
|--------|---------------|------|-------------|--------------|--------------|---------|
| 1      | 8.103         | FM R | 0.3488      | 3070.26880   | 146.69075    | 50.7465 |
| 2      | 15.181        | MF R | 0.7141      | 2979.93359   | 69.55104     | 49.2535 |

Totals : 6050.20239 216.24179

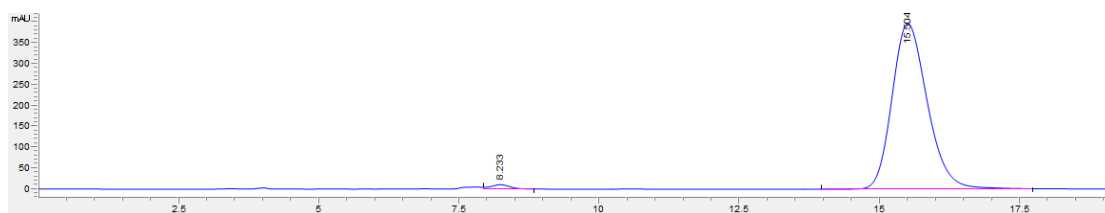

| Peak # | RetTime [min] | Type | Width [min] | Area [mAU*s] | Height [mAU] | Area %  |
|--------|---------------|------|-------------|--------------|--------------|---------|
| 1      | 8.233         | MF R | 0.4053      | 256.79465    | 10.56109     | 1.4457  |
| 2      | 15.504        | MF R | 0.7284      | 1.75053e4    | 400.56296    | 98.5543 |

Totals : 1.77621e4 411.12404

Compound **3m**:

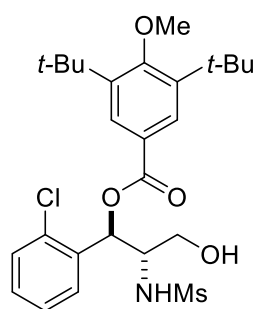

Chiralpak IA, *i*PrOH/Hexane = 20/80, 1.0 mL/min

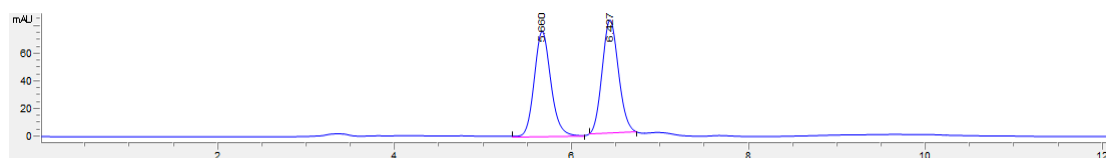

| Peak # | RetTime [min] | Type | Width [min] | Area [mAU*s] | Height [mAU] | Area %  |
|--------|---------------|------|-------------|--------------|--------------|---------|
| 1      | 5.660         | MF R | 0.2211      | 1020.05554   | 76.88001     | 49.0170 |
| 2      | 6.427         | MM R | 0.2142      | 1060.96912   | 82.53582     | 50.9830 |

Totals :                              2081.02466   159.41583

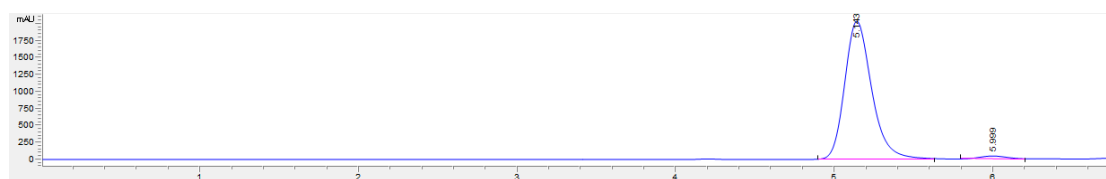

| Peak # | RetTime [min] | Type | Width [min] | Area [mAU*s] | Height [mAU] | Area %  |
|--------|---------------|------|-------------|--------------|--------------|---------|
| 1      | 5.143         | MM R | 0.1967      | 2.40345e4    | 2035.98572   | 97.6923 |
| 2      | 5.999         | MF R | 0.2077      | 567.75433    | 45.56978     | 2.3077  |

Totals :                              2.46023e4   2081.55550

Compound **2n**:

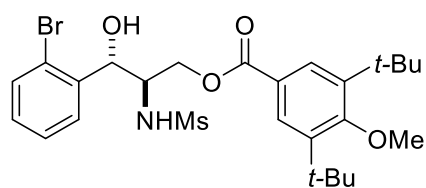

Chiralpak IC, *i*PrOH/Hexane = 20/80, 1.0 mL/min

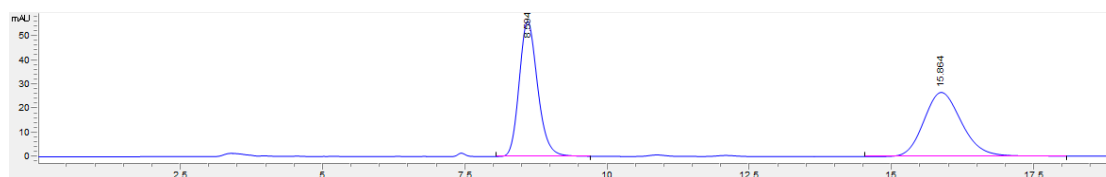

| Peak # | RetTime [min] | Type | Width [min] | Area [mAU*s] | Height [mAU] | Area %  |
|--------|---------------|------|-------------|--------------|--------------|---------|
| 1      | 8.594         | MF R | 0.3749      | 1266.56946   | 56.30074     | 50.7811 |
| 2      | 15.864        | BB   | 0.7134      | 1227.60376   | 26.64956     | 49.2189 |

Totals : 2494.17322 82.95030

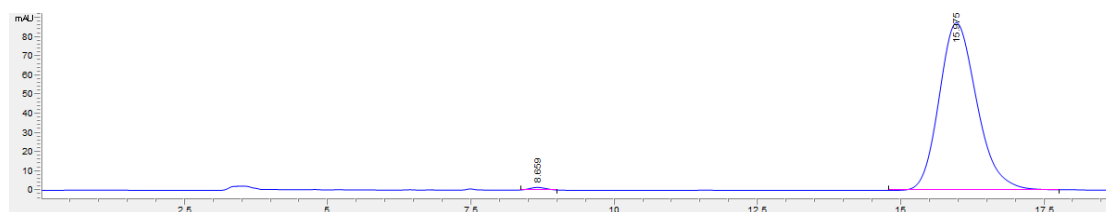

| Peak # | RetTime [min] | Type | Width [min] | Area [mAU*s] | Height [mAU] | Area %  |
|--------|---------------|------|-------------|--------------|--------------|---------|
| 1      | 8.659         | MM R | 0.3127      | 24.06032     | 1.28252      | 0.5972  |
| 2      | 15.975        | BB   | 0.7044      | 4005.05396   | 87.76820     | 99.4028 |

Totals : 4029.11428 89.05072

Compound **3n**:

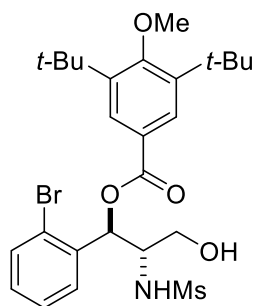

Chiralpak IA, *i*PrOH/Hexane = 20/80, 1.0 mL/min

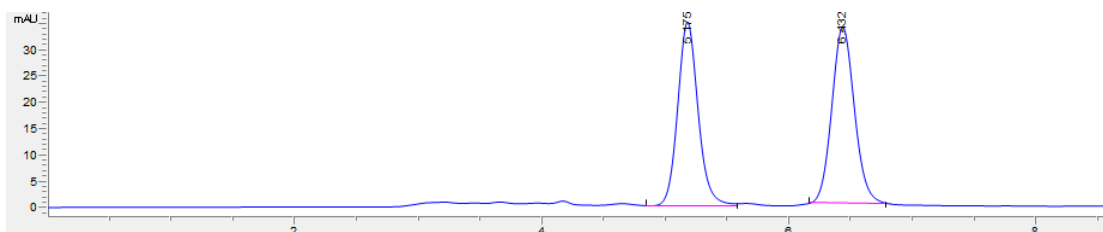

| Peak # | RetTime [min] | Type | Width [min] | Area [mAU*s] | Height [mAU] | Area %  |
|--------|---------------|------|-------------|--------------|--------------|---------|
| 1      | 5.175         | MM R | 0.1925      | 404.62036    | 35.03097     | 48.5722 |
| 2      | 6.432         | MM R | 0.2122      | 428.40790    | 33.64902     | 51.4278 |

Totals : 833.02826 68.67999

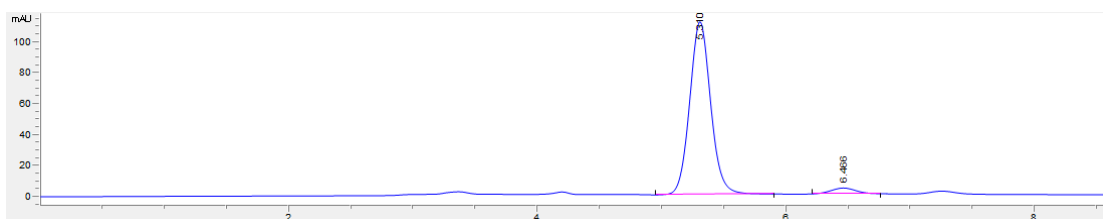

| Peak # | RetTime [min] | Type | Width [min] | Area [mAU*s] | Height [mAU] | Area %  |
|--------|---------------|------|-------------|--------------|--------------|---------|
| 1      | 5.310         | MF R | 0.1966      | 1315.28442   | 111.52897    | 95.5647 |
| 2      | 6.466         | FM R | 0.2540      | 61.04462     | 4.00505      | 4.4353  |

Totals : 1376.32905 115.53402

Compound **4o**:

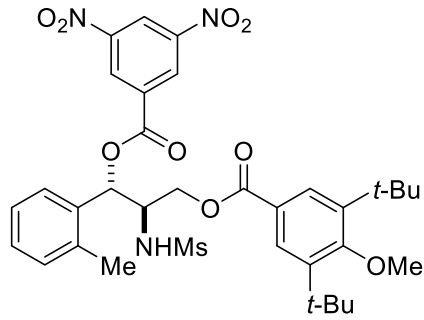

Chiralpak IA, *i*PrOH/Hexane = 20/80, 1.0 mL/min

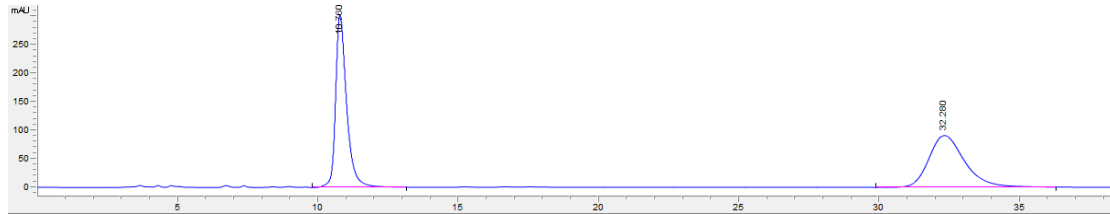

| Peak # | RetTime [min] | Type | Width [min] | Area [mAU*s] | Height [mAU] | Area %  |
|--------|---------------|------|-------------|--------------|--------------|---------|
| 1      | 10.760        | MF R | 0.4571      | 8347.69727   | 304.37473    | 50.5625 |
| 2      | 32.280        | MF R | 1.4873      | 8161.96143   | 91.46024     | 49.4375 |

Totals : 1.65097e4 395.83497

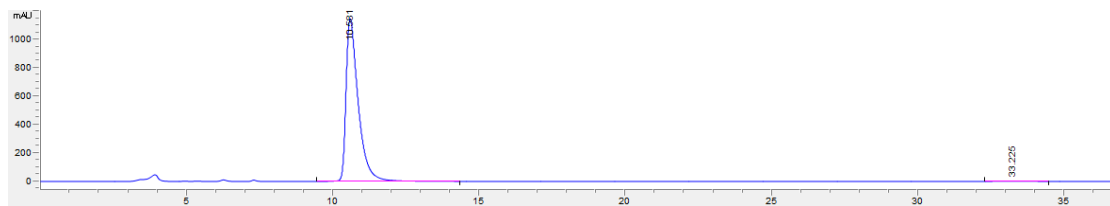

| Peak # | RetTime [min] | Type | Width [min] | Area [mAU*s] | Height [mAU] | Area %  |
|--------|---------------|------|-------------|--------------|--------------|---------|
| 1      | 10.581        | MF R | 0.4831      | 3.32119e4    | 1145.90369   | 99.4878 |
| 2      | 33.225        | FM R | 1.2760      | 170.97133    | 2.23324      | 0.5122  |

Totals : 3.33829e4 1148.13692

Compound **5o**:

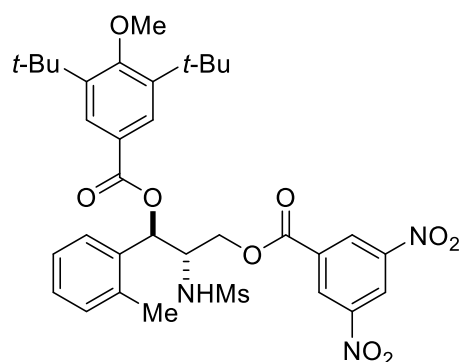

Chiralpak IA, *i*PrOH/Hexane = 20/80, 1.0 mL/min

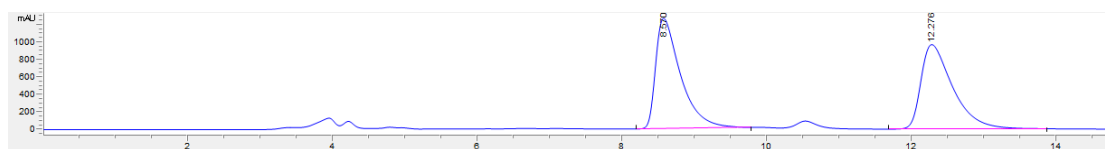

| Peak # | RetTime [min] | Type | Width [min] | Area [mAU*s] | Height [mAU] | Area %  |
|--------|---------------|------|-------------|--------------|--------------|---------|
| 1      | 8.570         | MM R | 0.3996      | 3.00759e4    | 1254.42603   | 50.3090 |
| 2      | 12.276        | MF R | 0.5145      | 2.97065e4    | 962.22491    | 49.6910 |

Totals : 5.97824e4 2216.65094

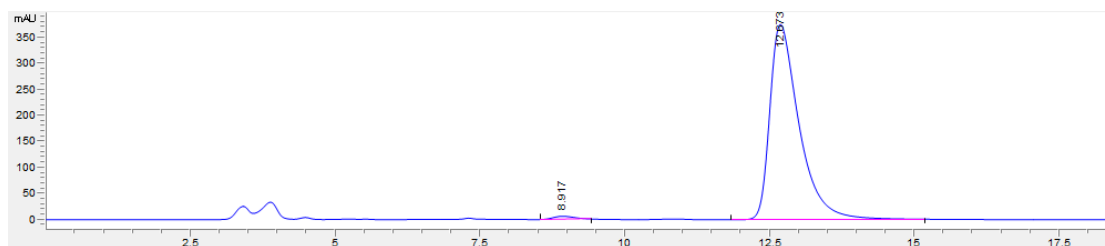

| Peak # | RetTime [min] | Type | Width [min] | Area [mAU*s] | Height [mAU] | Area %  |
|--------|---------------|------|-------------|--------------|--------------|---------|
| 1      | 8.917         | MM R | 0.4413      | 168.63042    | 6.36894      | 1.2446  |
| 2      | 12.673        | MF R | 0.5887      | 1.33809e4    | 378.84137    | 98.7554 |

Totals : 1.35495e4 385.21031

Compound **2p**:

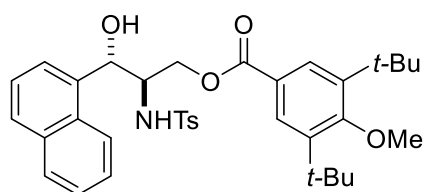

Chiralpak IA, *i*PrOH/Hexane = 20/80, 1.0 mL/min

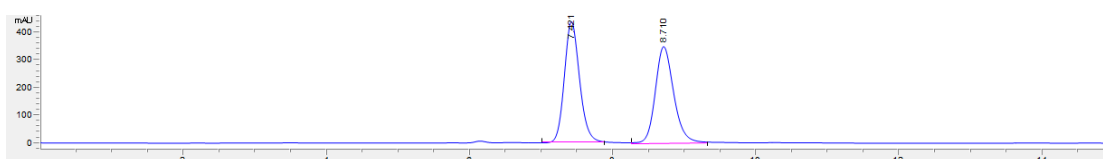

| Peak # | RetTime [min] | Type | Width [min] | Area [mAU*s] | Height [mAU] | Area %  |
|--------|---------------|------|-------------|--------------|--------------|---------|
| 1      | 7.421         | MM R | 0.2470      | 6491.74561   | 437.99408    | 50.2191 |
| 2      | 8.710         | MM R | 0.3045      | 6435.09814   | 352.27151    | 49.7809 |

Totals : 1.29268e4 790.26559

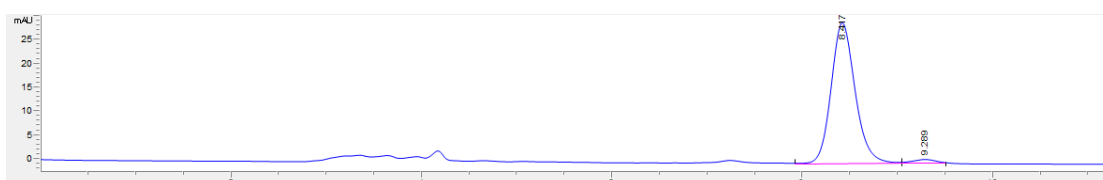

| Peak # | RetTime [min] | Type | Width [min] | Area [mAU*s] | Height [mAU] | Area %  |
|--------|---------------|------|-------------|--------------|--------------|---------|
| 1      | 8.417         | MF R | 0.2954      | 526.72211    | 29.71776     | 97.3330 |
| 2      | 9.289         | MF R | 0.2892      | 14.43257     | 8.31659e-1   | 2.6670  |

Totals : 541.15467 30.54942



Compound **4p**:

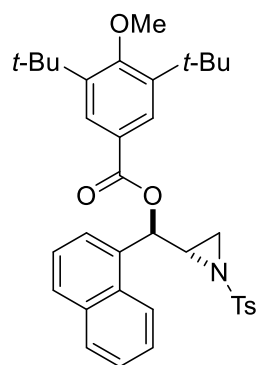

Chiralpak IC, *i*PrOH/Hexane = 20/80, 1.0 mL/min

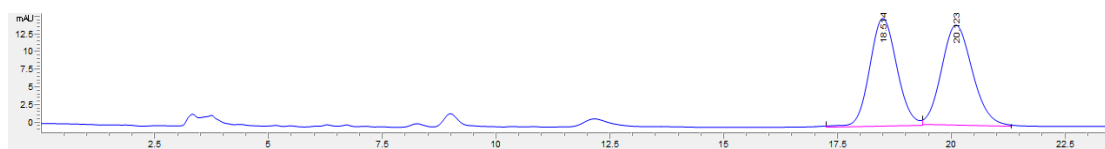

| Peak # | RetTime [min] | Type | Width [min] | Area [mAU*s] | Height [mAU] | Area %  |
|--------|---------------|------|-------------|--------------|--------------|---------|
| 1      | 18.514        | MM R | 0.7046      | 646.04968    | 15.28230     | 49.0601 |
| 2      | 20.123        | MM R | 0.7905      | 670.80396    | 14.14214     | 50.9399 |

Totals : 1316.85364 29.42443

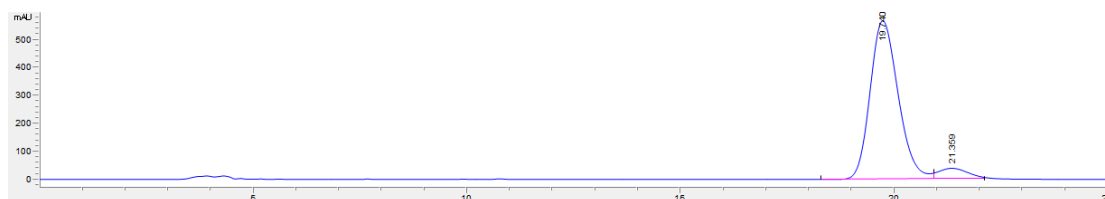

| Peak # | RetTime [min] | Type | Width [min] | Area [mAU*s] | Height [mAU] | Area %  |
|--------|---------------|------|-------------|--------------|--------------|---------|
| 1      | 19.740        | MF R | 0.7646      | 2.60845e4    | 568.60791    | 93.5076 |
| 2      | 21.359        | FM R | 0.7897      | 1811.08789   | 38.22164     | 6.4924  |

Totals : 2.78956e4 606.82955

Compound **2q**:

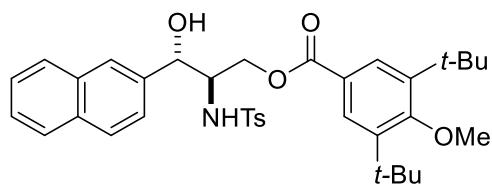

Chiralpak IC, *i*PrOH/Hexane = 20/80, 1.0 mL/min

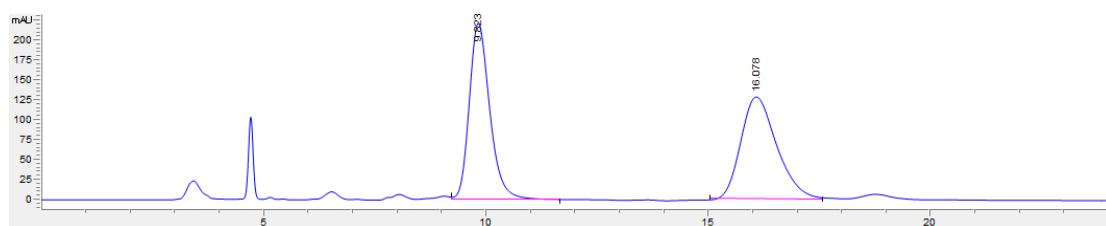

| Peak # | RetTime [min] | Type | Width [min] | Area [mAU*s] | Height [mAU] | Area %  |
|--------|---------------|------|-------------|--------------|--------------|---------|
| 1      | 9.823         | FM R | 0.5365      | 7127.71289   | 221.44101    | 49.6794 |
| 2      | 16.078        | MM R | 0.9394      | 7219.70410   | 128.08957    | 50.3206 |

Totals : 1.43474e4 349.53058

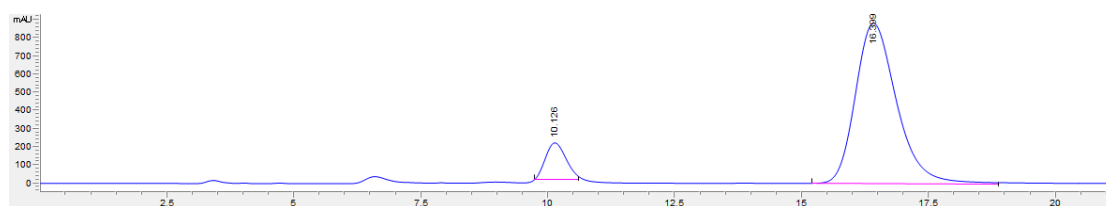

| Type # | RetTime [min] | Type | Width [min] | Area [mAU*s] | Height [mAU] | Area %  |
|--------|---------------|------|-------------|--------------|--------------|---------|
| 1      | 10.126        | MM R | 0.4748      | 5880.89746   | 206.41444    | 10.3270 |
| 2      | 16.399        | MM R | 0.9555      | 5.10658e4    | 890.70428    | 89.6730 |

Totals : 5.69467e4 1097.11873

Compound **3q**:

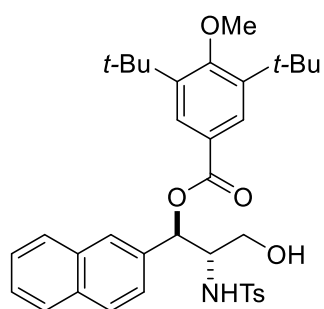

Chiralpak IA, *i*PrOH/Hexane = 20/80, 1.0 mL/min

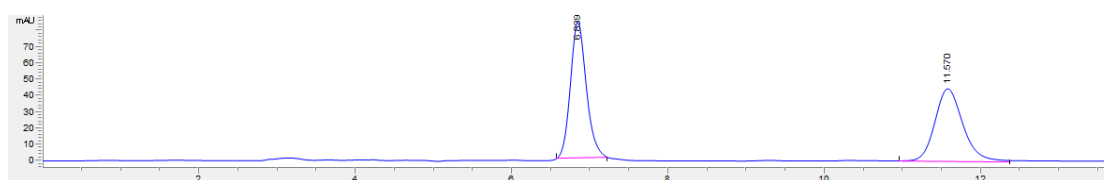

| Peak # | RetTime [min] | Type | Width [min] | Area [mAU*s] | Heigth [mAU] | Area %  |
|--------|---------------|------|-------------|--------------|--------------|---------|
| 1      | 6.839         | MM R | 0.2351      | 1175.52051   | 83.34734     | 50.8197 |
| 2      | 11.570        | MM R | 0.4230      | 1137.60083   | 44.82337     | 49.1803 |

Totals :                                          2313.12134    128.17071

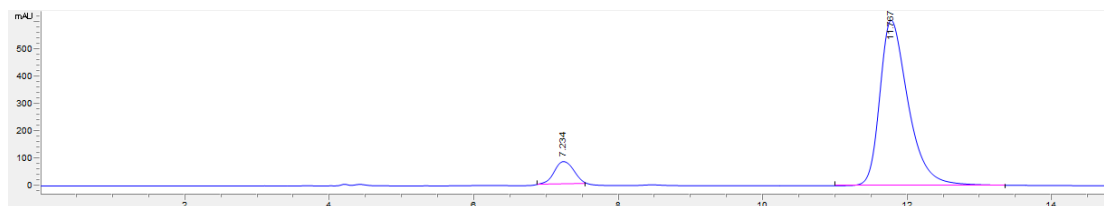

| Peak # | RetTime [min] | Type | Width [min] | Area [mAU*s] | Heigth [mAU] | Area %  |
|--------|---------------|------|-------------|--------------|--------------|---------|
| 1      | 7.234         | MM R | 0.3231      | 1629.07690   | 84.03812     | 8.9166  |
| 2      | 11.767        | FM R | 0.4572      | 1.66411e4    | 606.69489    | 91.0834 |

Totals :                                          1.82702e4    690.73300

Compound **2r**:

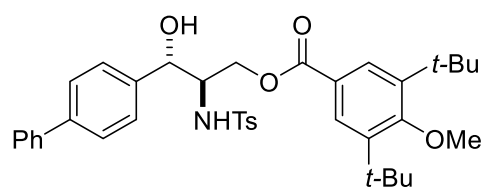

Chiralpak IC, *i*PrOH/Hexane = 20/80, 1.0 mL/min

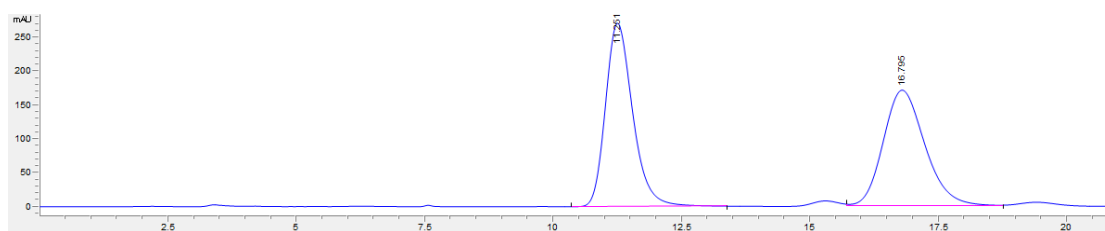

| Peak # | RetTime [min] | Type | Width [min] | Area [mAU*s] | Height [mAU] | Area %  |
|--------|---------------|------|-------------|--------------|--------------|---------|
| 1      | 11.251        | MF R | 0.6162      | 9989.28809   | 270.20178    | 50.4517 |
| 2      | 16.795        | MF R | 0.9539      | 9810.42578   | 171.40218    | 49.5483 |

Totals : 1.97997e4 441.60396

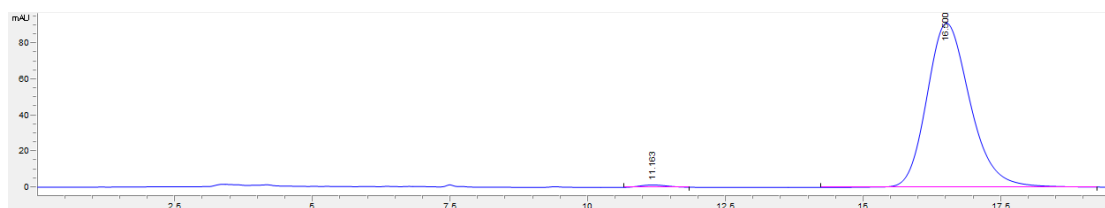

| Peak # | RetTime [min] | Type | Width [min] | Area [mAU*s] | Height [mAU] | Area %  |
|--------|---------------|------|-------------|--------------|--------------|---------|
| 1      | 11.163        | MM R | 0.6078      | 52.43101     | 1.43773      | 1.0311  |
| 2      | 16.500        | MF R | 0.9110      | 5032.43896   | 92.06938     | 98.9689 |

Totals : 5084.86998 93.50711

Compound **3r**:

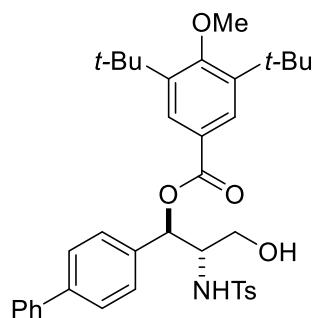

Chiralpak IA, *i*PrOH/Hexane = 20/80, 1.0 mL/min

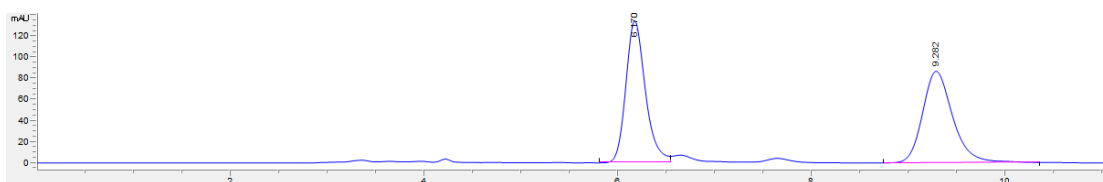

| Peak # | RetTime [min] | Type | Width [min] | Area [mAU*s] | Height [mAU] | Area %  |
|--------|---------------|------|-------------|--------------|--------------|---------|
| 1      | 6.170         | MF R | 0.2345      | 1893.07666   | 134.54764    | 50.3117 |
| 2      | 9.282         | BB   | 0.3296      | 1869.62354   | 86.68195     | 49.6883 |

Totals : 3762.70020 221.22958

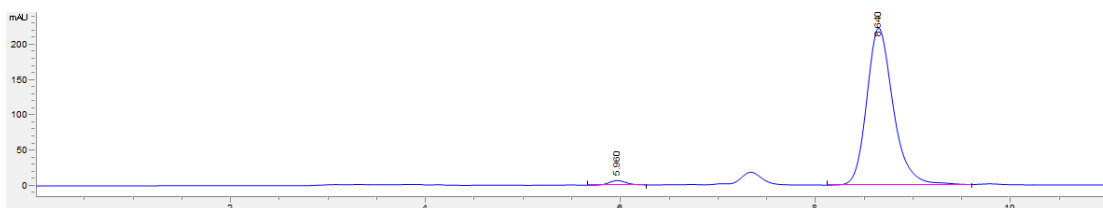

| Peak # | RetTime [min] | Type | Width [min] | Area [mAU*s] | Height [mAU] | Area %  |
|--------|---------------|------|-------------|--------------|--------------|---------|
| 1      | 5.960         | MF R | 0.2082      | 80.67686     | 6.45924      | 1.8758  |
| 2      | 8.640         | MF R | 0.3153      | 4220.21338   | 223.06403    | 98.1242 |

Totals : 4300.89024 229.52326

Compound **2s**:

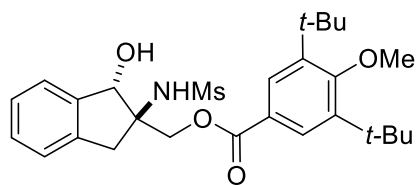

Chiralpak IA, *i*PrOH/Hexane = 20/80, 1.0 mL/min

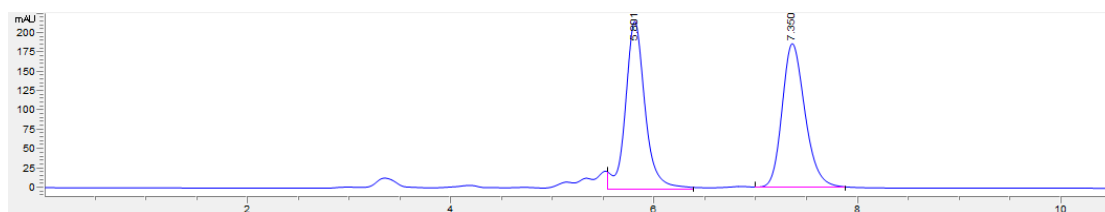

| Peak # | RetTime [min] | Type | Width [min] | Area [mAU*s] | Height [mAU] | Area %  |
|--------|---------------|------|-------------|--------------|--------------|---------|
| 1      | 5.801         | FM R | 0.2250      | 2938.46899   | 217.68880    | 49.9407 |
| 2      | 7.350         | MF R | 0.2633      | 2945.44775   | 186.47049    | 50.0593 |

Totals : 5883.91675 404.15929

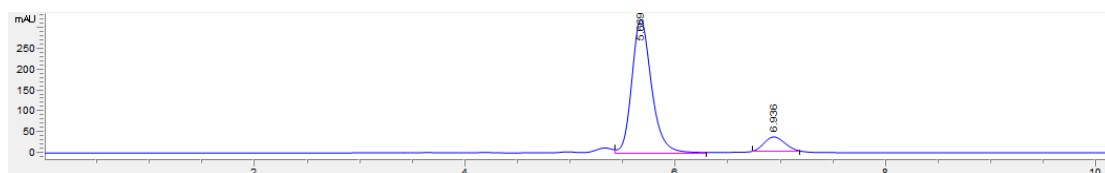

| Peak # | RetTime [min] | Type | Width [min] | Area [mAU*s] | Height [mAU] | Area %  |
|--------|---------------|------|-------------|--------------|--------------|---------|
| 1      | 5.669         | MF R | 0.2225      | 4280.12012   | 320.58472    | 89.9955 |
| 2      | 6.936         | MM R | 0.2290      | 475.80457    | 34.62359     | 10.0045 |

Totals : 4755.92468 355.20831

Compound **3s**:

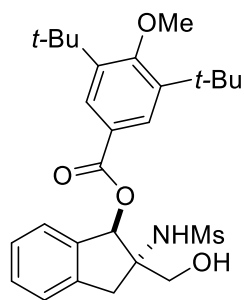

Chiralpak IC, *i*PrOH/Hexane = 20/80, 1.0 mL/min

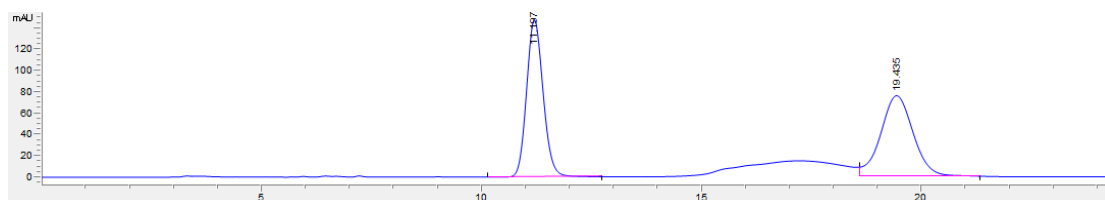

| Peak # | RetTime [min] | Type | Width [min] | Area [mAU*s] | Height [mAU] | Area %  |
|--------|---------------|------|-------------|--------------|--------------|---------|
| 1      | 11.197        | BB   | 0.4058      | 3853.24780   | 147.02486    | 49.3472 |
| 2      | 19.435        | MF R | 0.8671      | 3955.19971   | 76.02200     | 50.6528 |

Totals : 7808.44751 223.04685

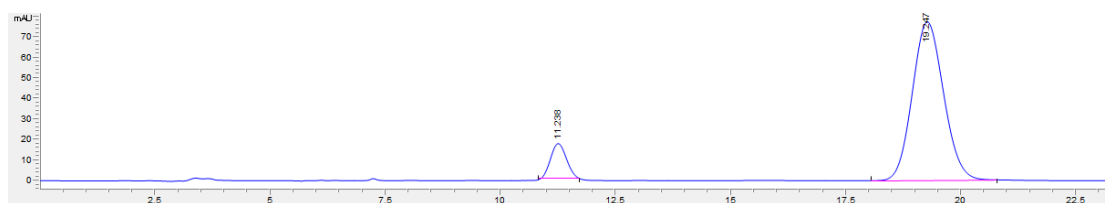

| Peak # | RetTime [min] | Type | Width [min] | Area [mAU*s] | Height [mAU] | Area %  |
|--------|---------------|------|-------------|--------------|--------------|---------|
| 1      | 11.238        | MM R | 0.4043      | 420.02600    | 17.31469     | 10.2048 |
| 2      | 19.247        | MF R | 0.7931      | 3695.93628   | 77.66958     | 89.7952 |

Totals : 4115.96228 94.98427

Compound **2t**:

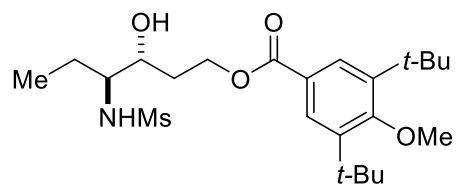

Chiralpak IC, *i*PrOH/Hexane = 20/80, 1.0 mL/min

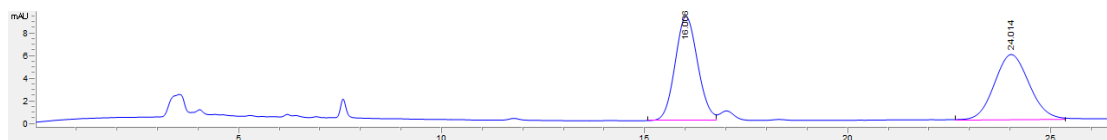

| Peak # | RetTime [min] | Type | Width [min] | Area [mAU*s] | Height [mAU] | Area %  |
|--------|---------------|------|-------------|--------------|--------------|---------|
| 1      | 16.006        | MF R | 0.6435      | 353.48953    | 9.15504      | 50.4364 |
| 2      | 24.014        | MM R | 1.0040      | 347.37305    | 5.76651      | 49.5636 |

Totals :                      700.86258    14.92156

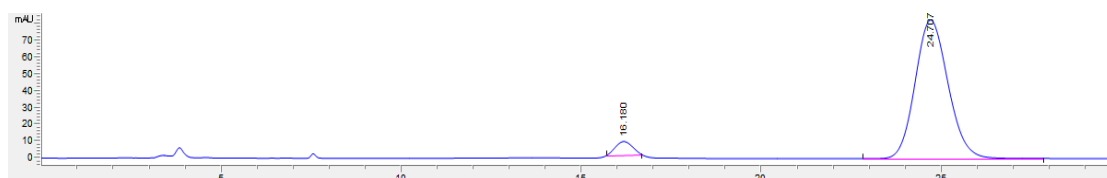

| Peak # | RetTime [min] | Type | Width [min] | Area [mAU*s] | Height [mAU] | Area %  |
|--------|---------------|------|-------------|--------------|--------------|---------|
| 1      | 16.180        | MM R | 0.5758      | 301.61484    | 8.73087      | 5.2490  |
| 2      | 24.707        | MM R | 1.0944      | 5444.52734   | 82.91692     | 94.7510 |

Totals :                      5746.14218    91.64779



Compound **3t**:

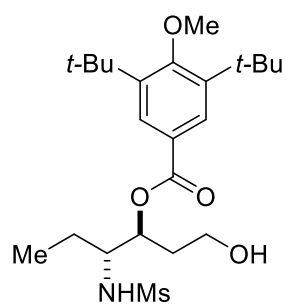

Chiralpak IC, *i*PrOH/Hexane = 20/80, 1.0 mL/min

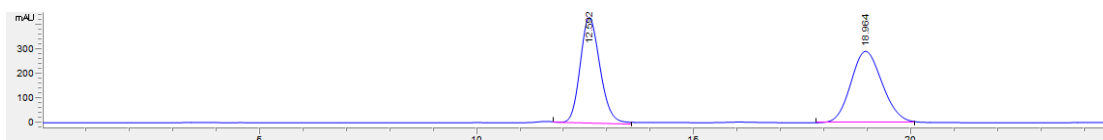

| Peak # | RetTime [min] | Type | Width [min] | Area [mAU*s] | Height [mAU] | Area %  |
|--------|---------------|------|-------------|--------------|--------------|---------|
| 1      | 12.592        | MM R | 0.5378      | 1.38896e4    | 430.42694    | 49.1300 |
| 2      | 18.964        | MM R | 0.8330      | 1.43815e4    | 287.73135    | 50.8700 |

Totals :                                      2.82711e4    718.15829

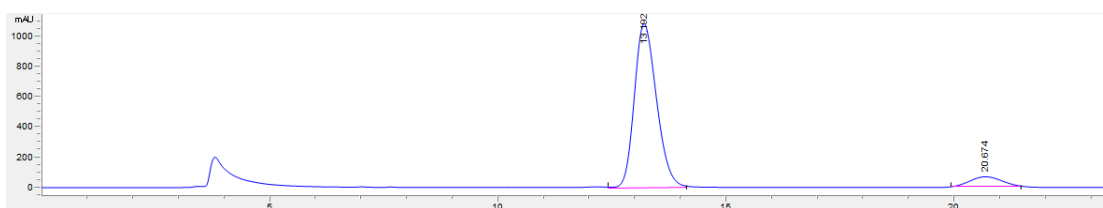

| Peak # | RetTime [min] | Type | Width [min] | Area [mAU*s] | Height [mAU] | Area %  |
|--------|---------------|------|-------------|--------------|--------------|---------|
| 1      | 13.192        | MM R | 0.5832      | 3.84365e4    | 1098.47729   | 92.8411 |
| 2      | 20.674        | MM R | 0.7775      | 2963.80273   | 63.52975     | 7.1589  |

Totals :                                      4.14003e4    1162.00705

Compound **2u**:

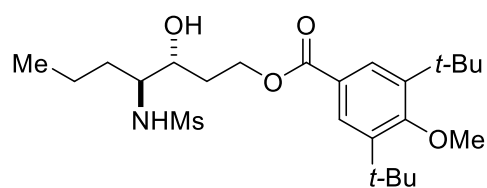

Chiralpak IC, *i*PrOH/Hexane = 20/80, 1.0 mL/min

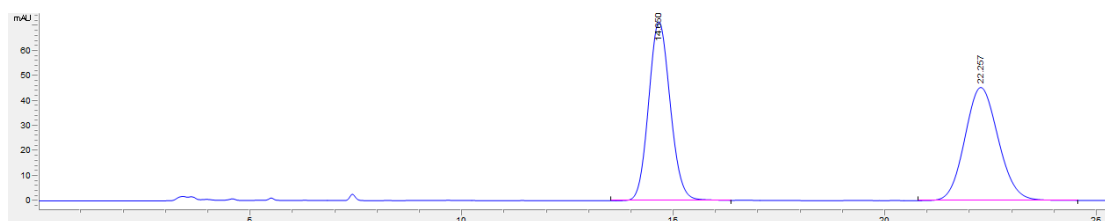

| Peak # | RetTime [min] | Type | Width [min] | Area [mAU*s] | Height [mAU] | Area %  |
|--------|---------------|------|-------------|--------------|--------------|---------|
| 1      | 14.650        | BB   | 0.5515      | 2525.97729   | 71.26984     | 50.5052 |
| 2      | 22.257        | MF R | 0.9148      | 2475.44141   | 45.09871     | 49.4948 |

Totals : 5001.41870 116.36856

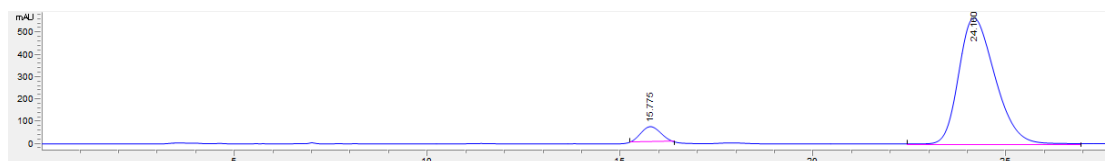

| Peak # | RetTime [min] | Type | Width [min] | Area [mAU*s] | Height [mAU] | Area %  |
|--------|---------------|------|-------------|--------------|--------------|---------|
| 1      | 15.775        | MM R | 0.5961      | 2483.02686   | 69.42413     | 6.1292  |
| 2      | 24.160        | MF R | 1.1155      | 3.80285e4    | 568.18994    | 93.8708 |

Totals : 4.05116e4 637.61407

Compound **3u**:

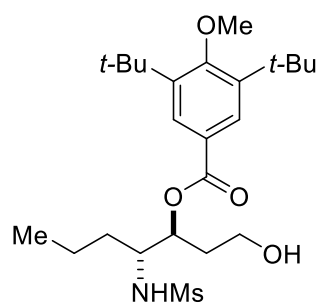

Chiralpak IC, *n*PrOH/Hexane = 20/80, 1.0 mL/min

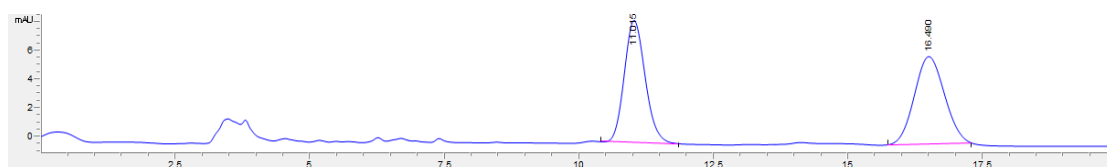

| Peak # | RetTime [min] | Type | Width [min] | Area [mAU*s] | Height [mAU] | Area %  |
|--------|---------------|------|-------------|--------------|--------------|---------|
| 1      | 11.015        | MM R | 0.4531      | 231.17279    | 8.50286      | 49.2019 |
| 2      | 16.490        | MM R | 0.6530      | 238.67239    | 6.09140      | 50.7981 |

Totals : 469.84518 14.59426

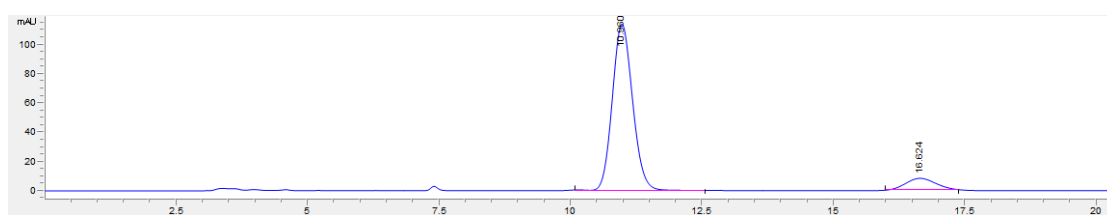

| Peak # | RetTime [min] | Type | Width [min] | Area [mAU*s] | Height [mAU] | Area %  |
|--------|---------------|------|-------------|--------------|--------------|---------|
| 1      | 10.960        | MM R | 0.4571      | 3123.55688   | 113.89382    | 90.4479 |
| 2      | 16.624        | MM R | 0.6770      | 329.87390    | 8.12067      | 9.5521  |

Totals : 3453.43079 122.01449

Compound **2v**:

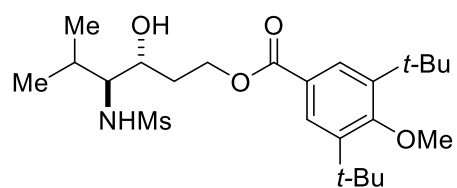

Chiralpak IC, *i*PrOH/Hexane = 20/80, 1.0 mL/min

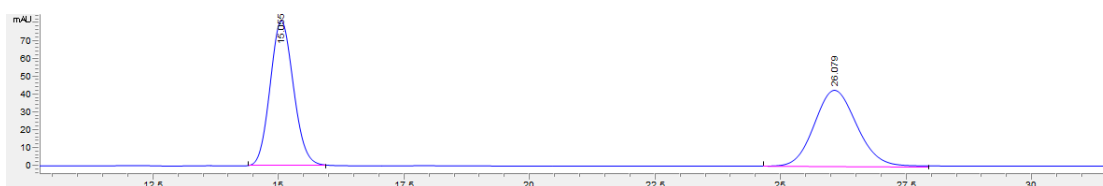

| Peak # | RetTime [min] | Type | Width [min] | Area [mAU*s] | Height [mAU] | Area %  |
|--------|---------------|------|-------------|--------------|--------------|---------|
| 1      | 15.055        | MM R | 0.5386      | 2603.18359   | 80.55975     | 50.1831 |
| 2      | 26.079        | MF R | 1.0087      | 2584.18896   | 42.70041     | 49.8169 |

Totals : 5187.37256 123.26016

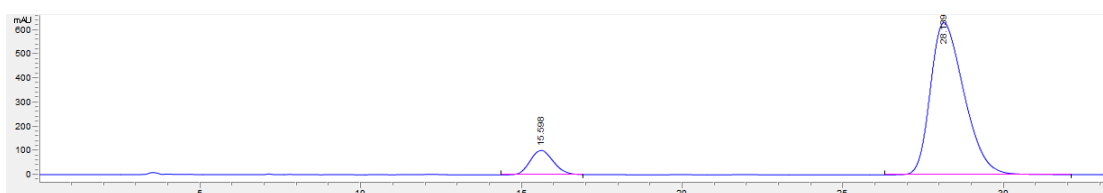

| Peak # | RetTime [min] | Type | Width [min] | Area [mAU*s] | Height [mAU] | Area %  |
|--------|---------------|------|-------------|--------------|--------------|---------|
| 1      | 15.598        | MF R | 0.8380      | 5054.88916   | 100.53133    | 9.9593  |
| 2      | 28.139        | MF R | 1.2115      | 4.57004e4    | 628.68848    | 90.0407 |

Totals : 5.07553e4 729.21981

Compound **3v**:

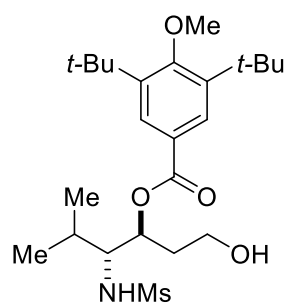

Chiralpak IA, *i*PrOH/Hexane = 20/80, 1.0 mL/min

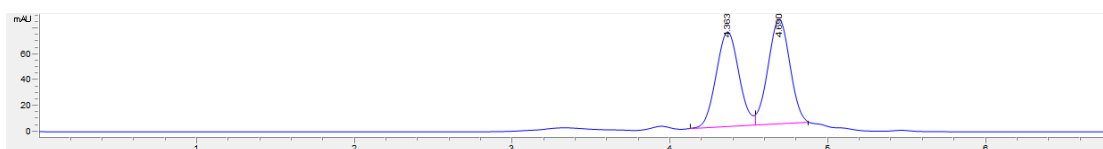

| Peak # | RetTime [min] | Type | Width [min] | Area [mAU*s] | Height [mAU] | Area %  |
|--------|---------------|------|-------------|--------------|--------------|---------|
| 1      | 4.363         | MF R | 0.1695      | 749.33148    | 73.70226     | 49.2007 |
| 2      | 4.690         | FM R | 0.1592      | 773.67914    | 80.97794     | 50.7993 |

Totals : 1523.01062 154.68019

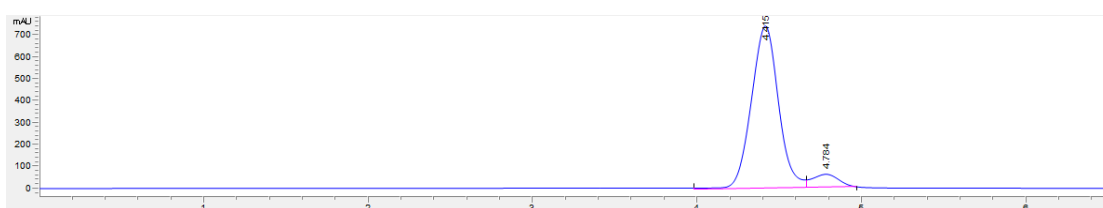

| Peak # | RetTime [min] | Type | Width [min] | Area [mAU*s] | Height [mAU] | Area %  |
|--------|---------------|------|-------------|--------------|--------------|---------|
| 1      | 4.415         | MF R | 0.1926      | 8631.96484   | 746.95996    | 92.9743 |
| 2      | 4.784         | FM R | 0.1811      | 652.27856    | 60.01554     | 7.0257  |

Totals : 9284.24341 806.97550

Compound **2w**:

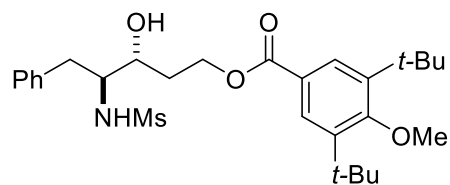

Chiralpak IA, *i*PrOH/Hexane = 20/80, 1.0 mL/min

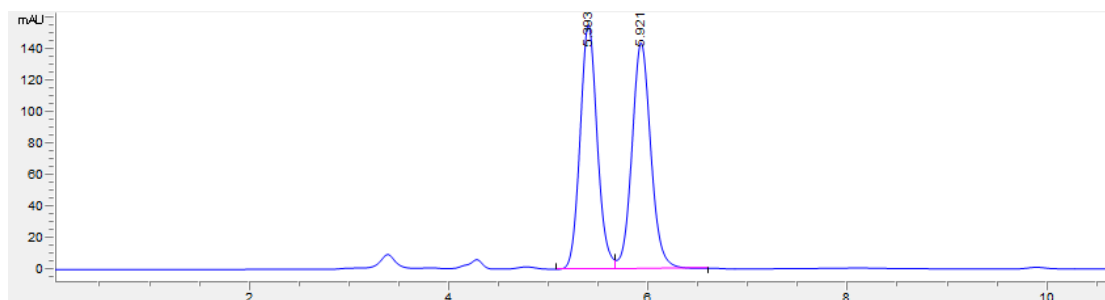

| Peak # | RetTime [min] | Type | Width [min] | Area [mAU*s] | Height [mAU] | Area %  |
|--------|---------------|------|-------------|--------------|--------------|---------|
| 1      | 5.393         | BV   | 0.1834      | 1854.53857   | 155.24379    | 49.5892 |
| 2      | 5.921         | VB   | 0.2012      | 1885.26501   | 143.53645    | 50.4108 |

Totals : 3739.80359 298.78024

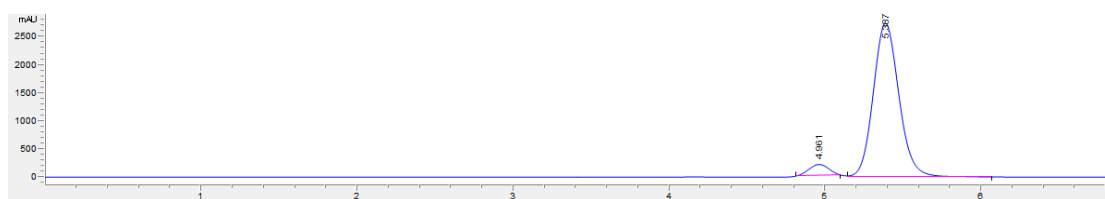

| Peak # | RetTime [min] | Type | Width [min] | Area [mAU*s] | Height [mAU] | Area %  |
|--------|---------------|------|-------------|--------------|--------------|---------|
| 1      | 4.961         | MM R | 0.1492      | 1805.76160   | 201.77519    | 5.3767  |
| 2      | 5.387         | MF R | 0.1921      | 3.17792e4    | 2757.42090   | 94.6233 |

Totals : 3.35850e4 2959.19609

Compound **3w**:

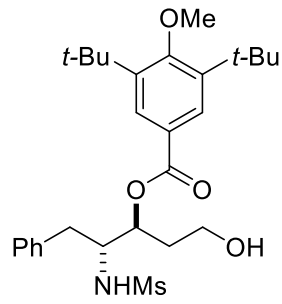

Chiralpak IA, *i*PrOH/Hexane = 08/92, 1.0 mL/min

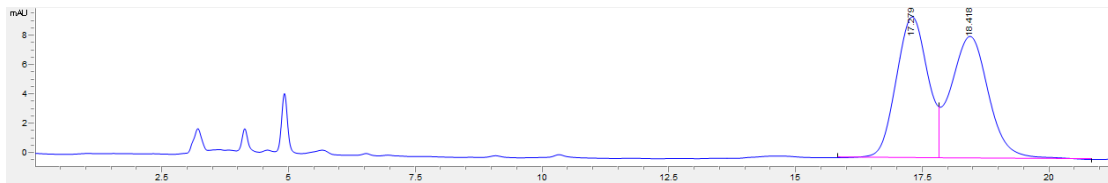

| Peak # | RetTime [min] | Type | Width [min] | Area [mAU*s] | Height [mAU] | Area %  |
|--------|---------------|------|-------------|--------------|--------------|---------|
| 1      | 17.279        | BV   | 0.6711      | 425.25073    | 9.70674      | 49.5792 |
| 2      | 18.418        | VB   | 0.7812      | 432.46973    | 8.39255      | 50.4208 |

Totals :                      857.72046    18.09929

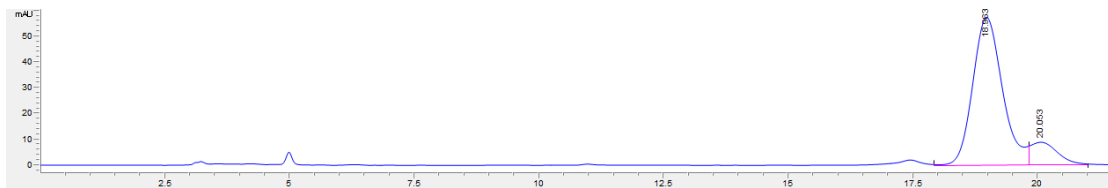

| Peak # | RetTime [min] | Type | Width [min] | Area [mAU*s] | Height [mAU] | Area %  |
|--------|---------------|------|-------------|--------------|--------------|---------|
| 1      | 18.963        | MF R | 0.6890      | 2366.46289   | 57.24720     | 89.8771 |
| 2      | 20.053        | FM R | 0.5454      | 266.53586    | 8.14544      | 10.1229 |

Totals :                      2632.99875    65.39263

Compound **2x**:

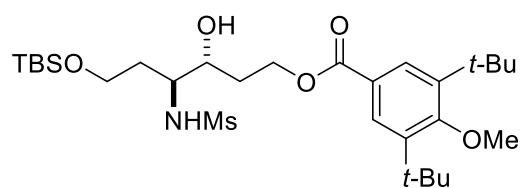

Chiralpak IC, *i*PrOH/Hexane = 20/80, 1.0 mL/min

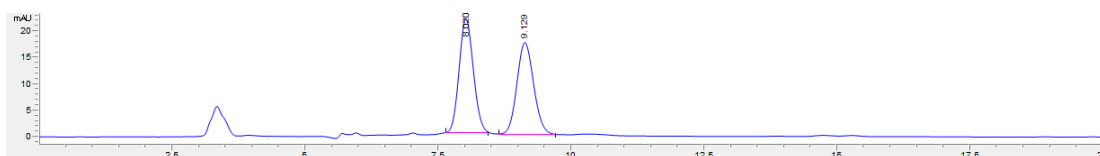

| Peak # | RetTime [min] | Type | Width [min] | Area [mAU*s] | Height [mAU] | Area %  |
|--------|---------------|------|-------------|--------------|--------------|---------|
| 1      | 8.020         | MM R | 0.3114      | 402.20981    | 21.52733     | 50.8336 |
| 2      | 9.129         | MM R | 0.3717      | 389.01859    | 17.44121     | 49.1664 |

Totals : 791.22839 38.96854

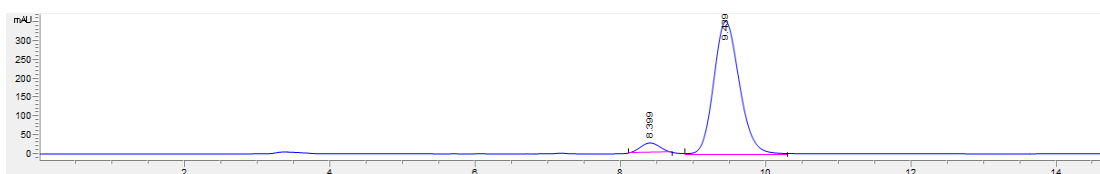

| Peak # | RetTime [min] | Type | Width [min] | Area [mAU*s] | Height [mAU] | Area %  |
|--------|---------------|------|-------------|--------------|--------------|---------|
| 1      | 8.399         | MM R | 0.3118      | 496.58609    | 26.54244     | 5.3032  |
| 2      | 9.439         | MM R | 0.4155      | 8867.22949   | 355.67242    | 94.6968 |

Totals : 9363.81558 382.21486



Compound **3x**:

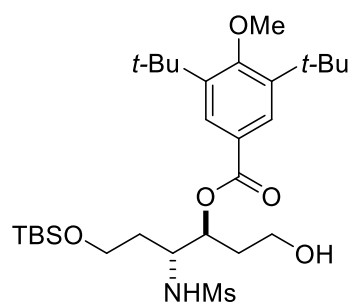

Chiralpak IC, *i*PrOH/Hexane = 20/80, 1.0 mL/min

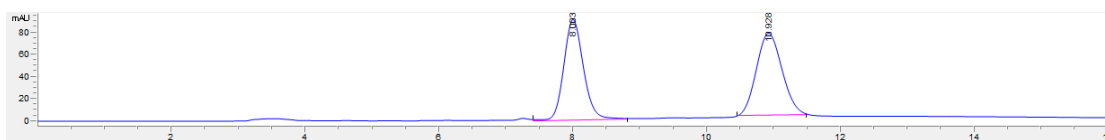

| Peak # | RetTime [min] | Type | Width [min] | Area [mAU*s] | Height [mAU] | Area %  |
|--------|---------------|------|-------------|--------------|--------------|---------|
| 1      | 8.003         | MM R | 0.3479      | 1925.26550   | 92.22579     | 49.0579 |
| 2      | 10.928        | MM R | 0.4449      | 1999.21277   | 74.90151     | 50.9421 |

Totals :                                    3924.47827    167.12730

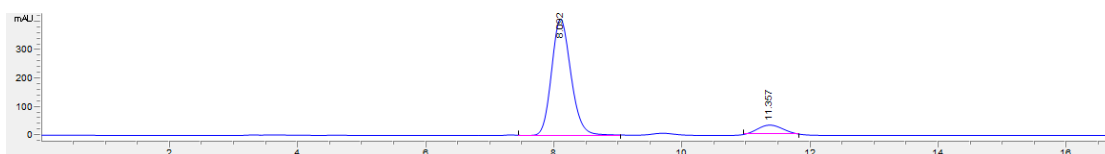

| Peak # | RetTime [min] | Type | Width [min] | Area [mAU*s] | Height [mAU] | Area %  |
|--------|---------------|------|-------------|--------------|--------------|---------|
| 1      | 8.092         | MF R | 0.3599      | 8899.72754   | 412.18118    | 90.8885 |
| 2      | 11.357        | MM R | 0.4563      | 892.19598    | 32.59122     | 9.1115  |

Totals :                                    9791.92352    444.77241

Compound **2y**:

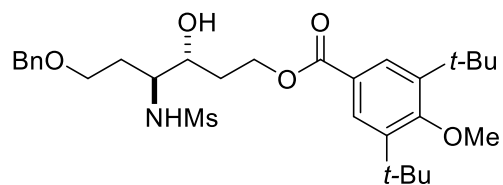

Chiralpak IC, *i*PrOH/Hexane = 10/90, 1.0 mL/min

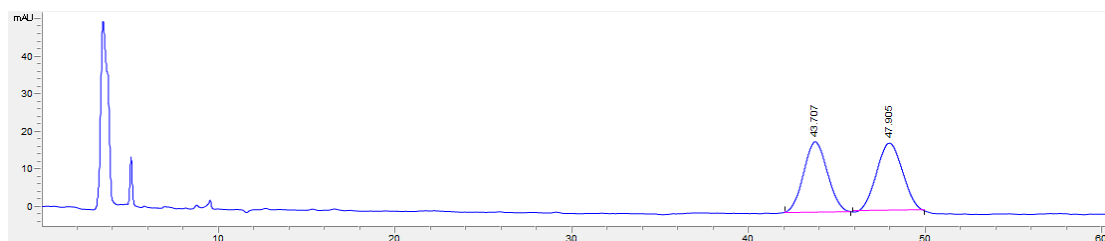

| Peak # | RetTime [min] | Type | Width [min] | Area [mAU*s] | Height [mAU] | Area %  |
|--------|---------------|------|-------------|--------------|--------------|---------|
| 1      | 43.707        | MM R | 1.5711      | 1773.79663   | 18.81698     | 49.1183 |
| 2      | 47.905        | MM R | 1.7067      | 1837.47437   | 17.94343     | 50.8817 |

Totals : 3611.27100 36.76041

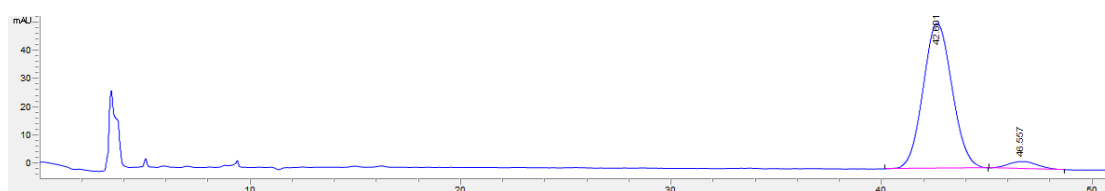

| Peak # | RetTime [min] | Type | Width [min] | Area [mAU*s] | Height [mAU] | Area %  |
|--------|---------------|------|-------------|--------------|--------------|---------|
| 1      | 42.601        | BB   | 1.4876      | 4946.07861   | 51.72303     | 95.1333 |
| 2      | 46.557        | MF R | 1.6494      | 253.02507    | 2.55677      | 4.8667  |

Totals : 5199.10368 54.27980

Compound **3y**:

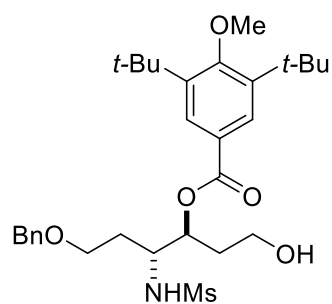

Chiralpak IC, *i*PrOH/Hexane = 20/80, 1.0 mL/min

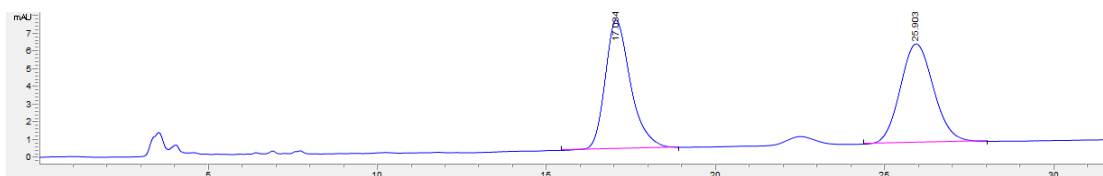

| Peak #   | RetTime [min] | Type | Width [min] | Area [mAU*s] | Heigth [mAU] | Area %  |
|----------|---------------|------|-------------|--------------|--------------|---------|
| 1        | 17.034        | BB   | 0.7907      | 380.98932    | 7.30170      | 49.7163 |
| 2        | 25.903        | BB   | 1.0483      | 385.33795    | 5.60370      | 50.2837 |
| Totals : |               |      |             | 766.32727    | 12.90541     |         |

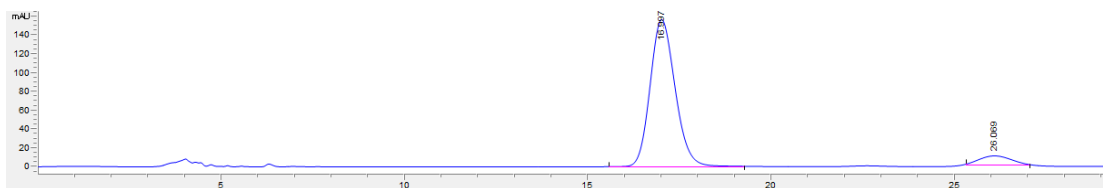

| Peak #   | RetTime [min] | Type | Width [min] | Area [mAU*s] | Heigth [mAU] | Area %  |
|----------|---------------|------|-------------|--------------|--------------|---------|
| 1        | 16.997        | FM R | 0.8135      | 7733.54492   | 158.44124    | 92.4440 |
| 2        | 26.069        | FM R | 1.0334      | 632.11096    | 10.19450     | 7.5560  |
| Totals : |               |      |             | 8365.65588   | 168.63574    |         |

Compound **2z**:

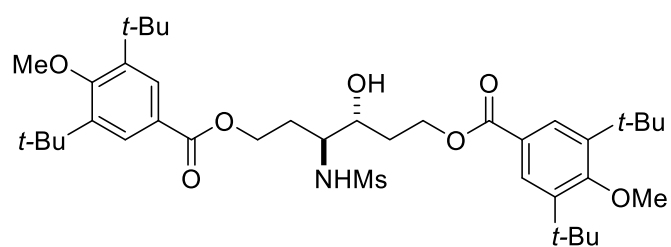

Chiralpak IA, *n*PrOH/Hexane = 20/80, 1.0 mL/min

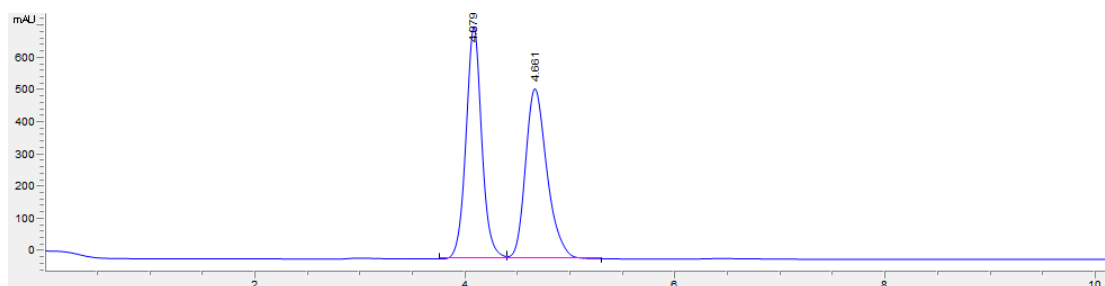

| Peak # | RetTime [min] | Type | Width [min] | Area [mAU*s] | Height [mAU] | Area %  |
|--------|---------------|------|-------------|--------------|--------------|---------|
| 1      | 4.079         | BV   | 0.1581      | 7590.28467   | 725.54510    | 49.8620 |
| 2      | 4.661         | MF R | 0.2388      | 7632.29980   | 532.78455    | 50.1380 |

Totals : 1.52226e4 1258.32965

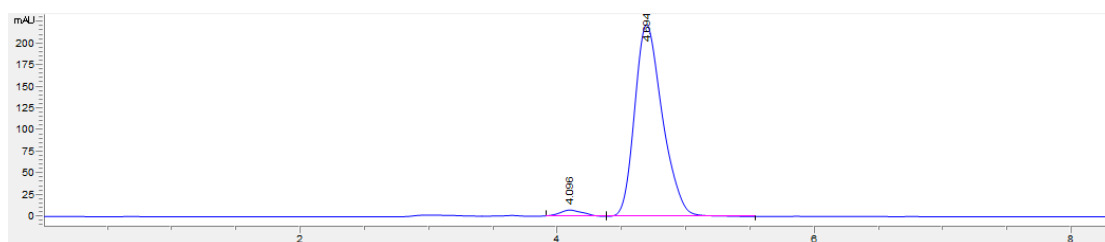

| Peak # | RetTime [min] | Type | Width [min] | Area [mAU*s] | Height [mAU] | Area %  |
|--------|---------------|------|-------------|--------------|--------------|---------|
| 1      | 4.096         | FM R | 0.2222      | 102.01697    | 7.65150      | 2.9676  |
| 2      | 4.694         | VB   | 0.2292      | 3335.65771   | 222.18404    | 97.0324 |

Totals : 3437.67468 229.83554

Compound **3z**:

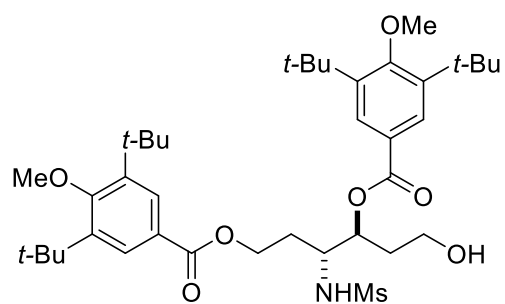

Chiralpak IC, *i*PrOH/Hexane = 15/85, 1.0 mL/min

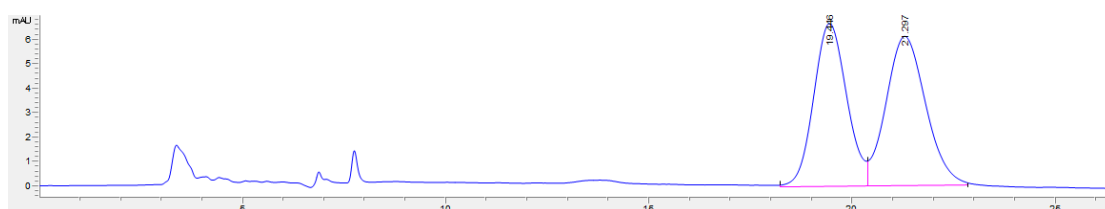

| Peak #   | RetTime [min] | Type | Width [min] | Area [mAU*s] | Height [mAU] | Area %  |
|----------|---------------|------|-------------|--------------|--------------|---------|
| 1        | 19.446        | MF R | 0.9478      | 379.13327    | 6.66675      | 47.7054 |
| 2        | 21.297        | FM R | 1.1341      | 415.60504    | 6.10754      | 52.2946 |
| Totals : |               |      |             | 794.73831    | 12.77428     |         |

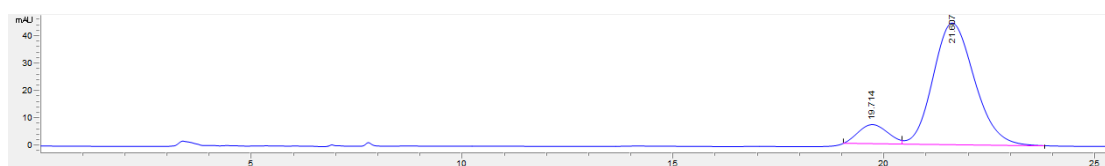

| Peak #   | RetTime [min] | Type | Width [min] | Area [mAU*s] | Height [mAU] | Area %  |
|----------|---------------|------|-------------|--------------|--------------|---------|
| 1        | 19.714        | MF R | 0.8213      | 352.68716    | 7.15703      | 10.2410 |
| 2        | 21.607        | FM R | 1.1428      | 3091.19409   | 45.08228     | 89.7590 |
| Totals : |               |      |             | 3443.88126   | 52.23930     |         |

Compound **2aa**:

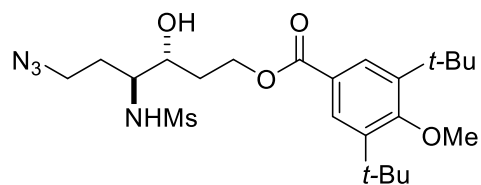

Chiralpak IC, *i*PrOH/Hexane = 20/80, 1.0 mL/min

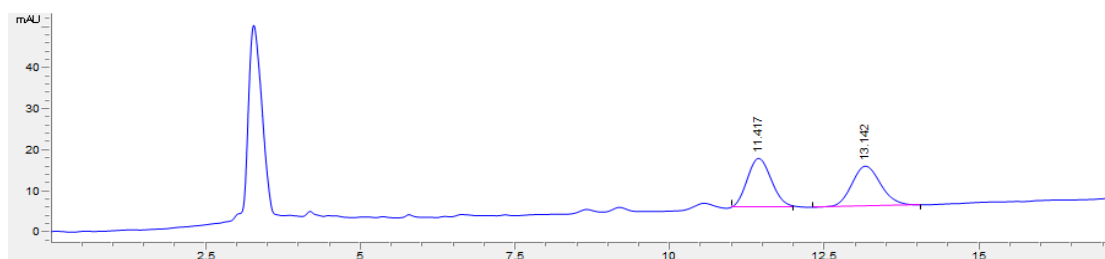

| Peak # | RetTime [min] | Type | Width [min] | Area [mAU*s] | Height [mAU] | Area %  |
|--------|---------------|------|-------------|--------------|--------------|---------|
| 1      | 11.417        | MM R | 0.4557      | 329.98611    | 12.07008     | 50.7792 |
| 2      | 13.142        | BB   | 0.5084      | 319.85941    | 9.81102      | 49.2208 |

Totals :                                      649.84552      21.88110

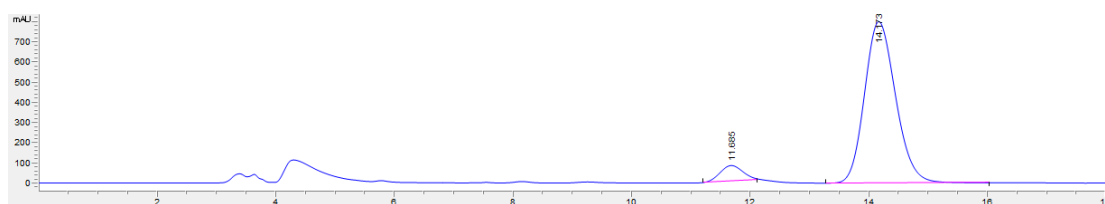

| Peak # | RetTime [min] | Type | Width [min] | Area [mAU*s] | Height [mAU] | Area %  |
|--------|---------------|------|-------------|--------------|--------------|---------|
| 1      | 11.685        | MM R | 0.4429      | 2022.49609   | 76.11190     | 6.5349  |
| 2      | 14.173        | BB   | 0.5645      | 2.89266e4    | 794.95868    | 93.4651 |

Totals :                                      3.09491e4      871.07058

Compound **3aa**:

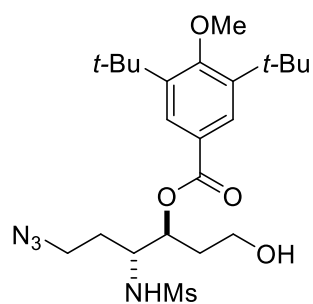

Chiralpak IC, *i*PrOH/Hexane = 20/80, 1.0 mL/min

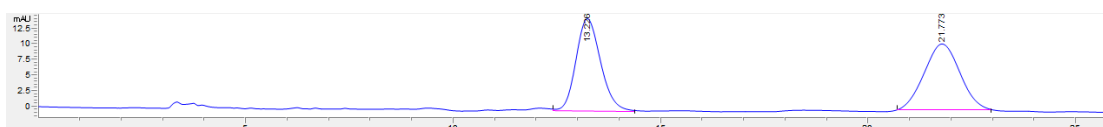

| Peak # | RetTime [min] | Type | Width [min] | Area [mAU*s] | Height [mAU] | Area %  |
|--------|---------------|------|-------------|--------------|--------------|---------|
| 1      | 13.226        | MM R | 0.6944      | 616.36871    | 14.79436     | 49.2499 |
| 2      | 21.773        | MM R | 1.0031      | 635.14282    | 10.55284     | 50.7501 |

Totals :                      1251.51154    25.34720

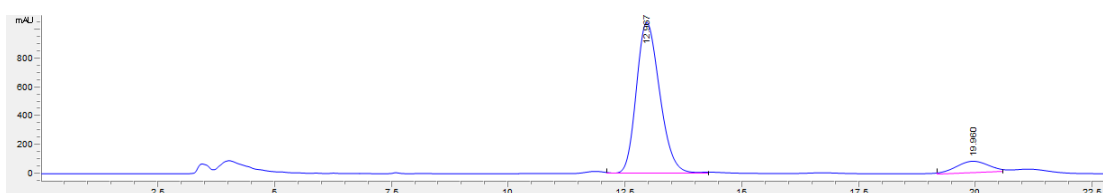

| Peak # | RetTime [min] | Type | Width [min] | Area [mAU*s] | Height [mAU] | Area %  |
|--------|---------------|------|-------------|--------------|--------------|---------|
| 1      | 12.967        | FM R | 0.5815      | 3.63893e4    | 1042.95093   | 90.4342 |
| 2      | 19.960        | MM R | 0.8121      | 3849.10889   | 78.99490     | 9.5658  |

Totals :                      4.02384e4    1121.94582

Compound **4a**:

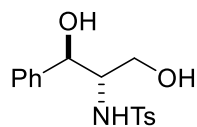

Chiralpak IC, *i*PrOH/Hexane = 30/70, 1.0 mL/min

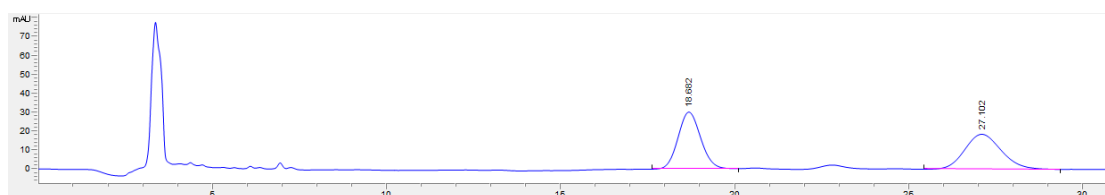

| Peak # | RetTime [min] | Type | Width [min] | Area [mAU*s] | Height [mAU] | Area %  |
|--------|---------------|------|-------------|--------------|--------------|---------|
| 1      | 18.682        | BB   | 0.7007      | 1357.27039   | 30.06482     | 49.9453 |
| 2      | 27.102        | BB   | 1.1065      | 1360.24561   | 18.57072     | 50.0547 |

Totals : 2717.51599 48.63554

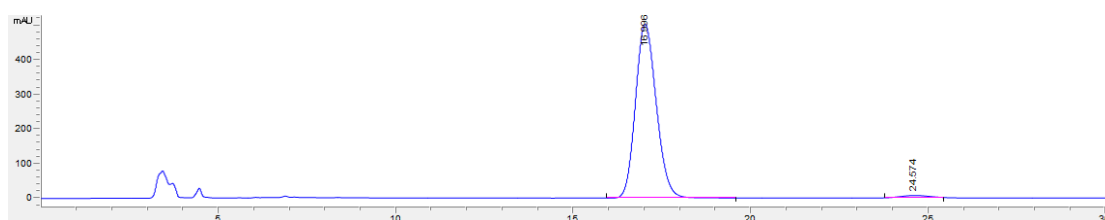

| Peak # | RetTime [min] | Type | Width [min] | Area [mAU*s] | Height [mAU] | Area %  |
|--------|---------------|------|-------------|--------------|--------------|---------|
| 1      | 16.996        | BB   | 0.6357      | 2.04766e4    | 502.24222    | 97.8819 |
| 2      | 24.574        | FM R | 1.0017      | 443.09485    | 7.37217      | 2.1181  |

Totals : 2.09197e4 509.61439



Compound **6a**:

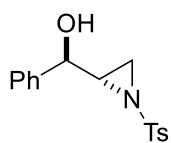

Chiralpak IC, *i*PrOH/Hexane = 30/70, 1.0 mL/min

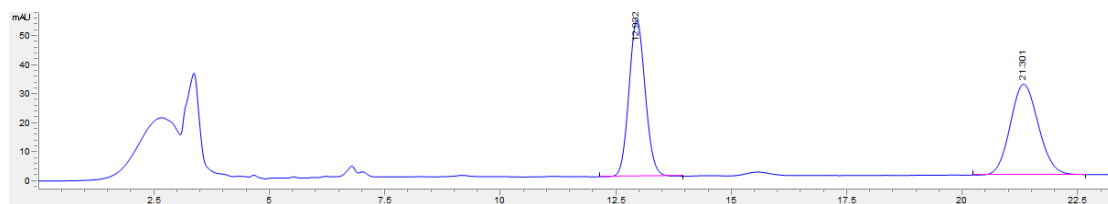

| Peak # | RetTime [min] | Type | Width [min] | Area [mAU*s] | Height [mAU] | Area %  |
|--------|---------------|------|-------------|--------------|--------------|---------|
| 1      | 12.932        | BB   | 0.3798      | 1316.29285   | 53.73311     | 49.9932 |
| 2      | 21.301        | BB   | 0.6600      | 1316.65161   | 31.09443     | 50.0068 |

Totals : 2632.94446 84.82754

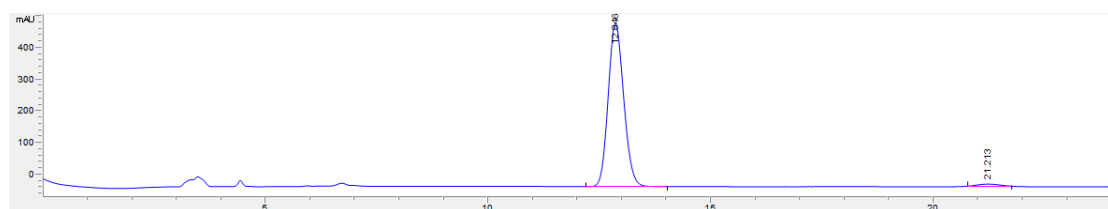

| Peak # | RetTime [min] | Type | Width [min] | Area [mAU*s] | Height [mAU] | Area %  |
|--------|---------------|------|-------------|--------------|--------------|---------|
| 1      | 12.846        | MF R | 0.4035      | 1.24998e4    | 516.34064    | 97.4548 |
| 2      | 21.213        | FM R | 0.6496      | 326.45926    | 8.37549      | 2.5452  |

Totals : 1.28263e4 524.71613

Compound **7a**:

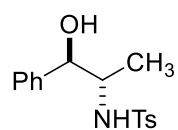

Chiralpak IA, *i*PrOH/Hexane = 20/80, 1.0 mL/min

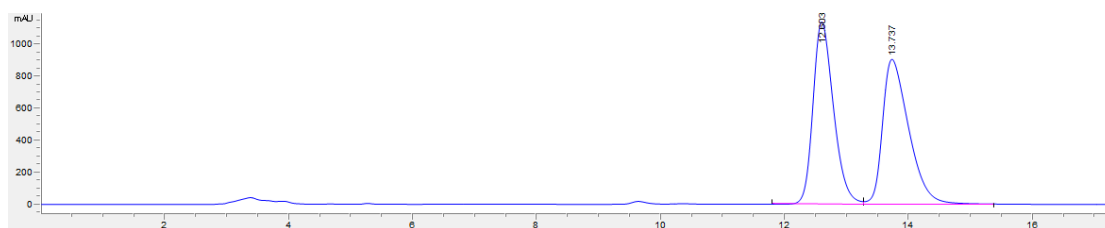

| Peak # | RetTime [min] | Type | Width [min] | Area [mAU*s] | Height [mAU] | Area %  |
|--------|---------------|------|-------------|--------------|--------------|---------|
| 1      | 12.603        | BV   | 0.3527      | 2.61541e4    | 1135.64819   | 49.6017 |
| 2      | 13.737        | MF R | 0.4904      | 2.65741e4    | 903.13007    | 50.3983 |

Totals : 5.27282e4 2038.77826

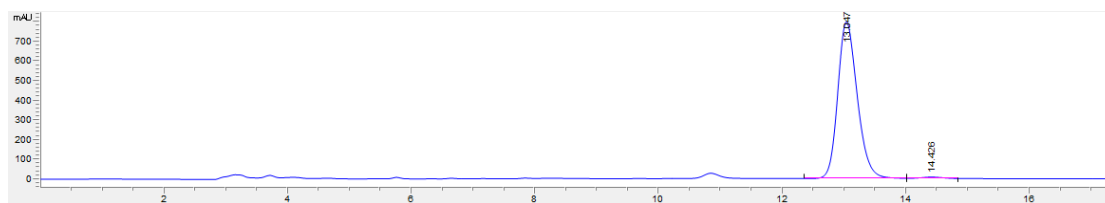

| Peak # | RetTime [min] | Type | Width [min] | Area [mAU*s] | Height [mAU] | Area %  |
|--------|---------------|------|-------------|--------------|--------------|---------|
| 1      | 13.047        | MF R | 0.3660      | 1.76583e4    | 804.18536    | 98.8132 |
| 2      | 14.426        | MF R | 0.4489      | 212.07799    | 7.87441      | 1.1868  |

Totals : 1.78703e4 812.05977



Compound **4aa**:

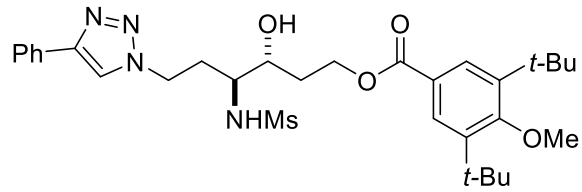

Chiralpak IA, *i*PrOH/Hexane =20/80, 1.0 mL/min

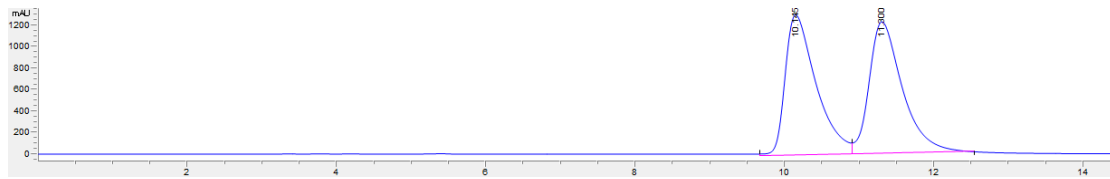

| Peak # | RetTime [min] | Type | Width [min] | Area [mAU*s] | Height [mAU] | Area %  |
|--------|---------------|------|-------------|--------------|--------------|---------|
| 1      | 10.145        | MF R | 0.4841      | 3.79498e4    | 1306.50977   | 49.9486 |
| 2      | 11.300        | FM R | 0.5172      | 3.80279e4    | 1225.46545   | 50.0514 |

Totals :                                 7.59776e4  2531.97522

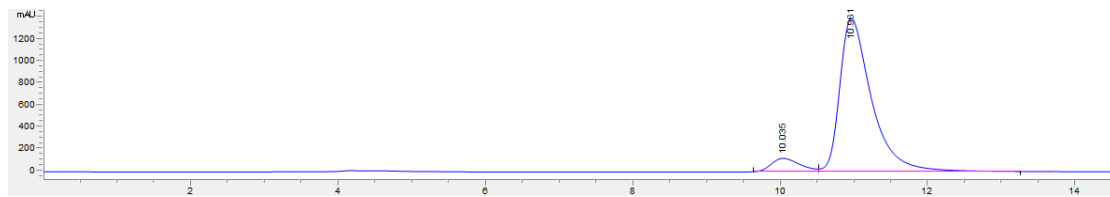

| Peak # | RetTime [min] | Type | Width [min] | Area [mAU*s] | Height [mAU] | Area %  |
|--------|---------------|------|-------------|--------------|--------------|---------|
| 1      | 10.035        | FM R | 0.4573      | 3431.63086   | 125.07574    | 7.4606  |
| 2      | 10.961        | MF R | 0.5037      | 4.25650e4    | 1408.39661   | 92.5394 |

Totals :                                 4.59966e4  1533.47234

Compound **6o**:

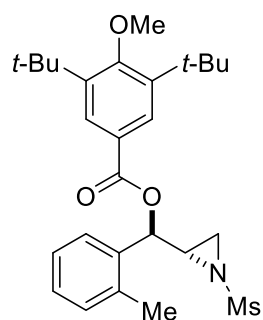

Chiralpak IC, *i*PrOH/Hexane = 20/80, 1.0 mL/min

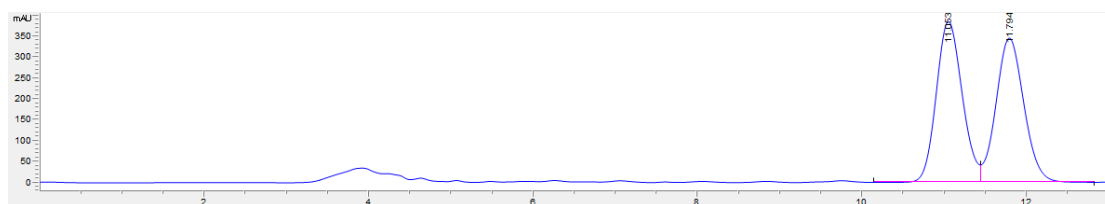

| Peak # | RetTime [min] | Type | Width [min] | Area [mAU*s] | Height [mAU] | Area %  |
|--------|---------------|------|-------------|--------------|--------------|---------|
| 1      | 11.053        | BV   | 0.3415      | 8435.36230   | 385.21185    | 50.9041 |
| 2      | 11.794        | VB   | 0.3652      | 8135.73242   | 344.96109    | 49.0959 |

Totals : 1.65711e4 730.17294

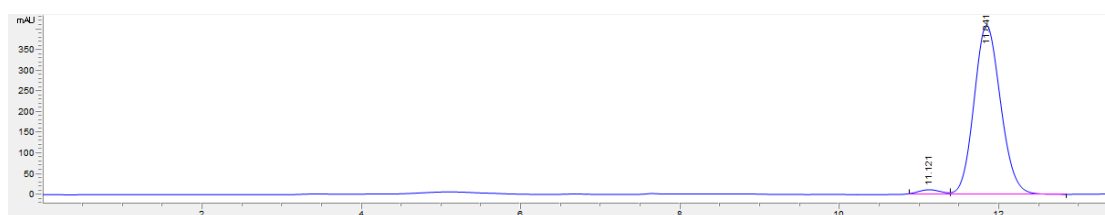

| Peak # | RetTime [min] | Type | Width [min] | Area [mAU*s] | Height [mAU] | Area %  |
|--------|---------------|------|-------------|--------------|--------------|---------|
| 1      | 11.121        | FM R | 0.3401      | 235.81339    | 11.55488     | 2.4135  |
| 2      | 11.841        | FM R | 0.3857      | 9534.89355   | 412.03357    | 97.5865 |

Totals : 9770.70694 423.58845

Compound **1o'**:

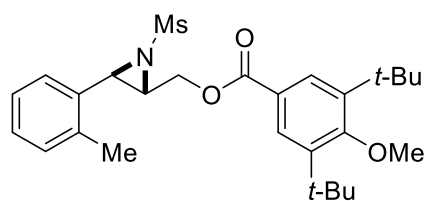

Chiralpak IC, *i*PrOH/Hexane = 20/80, 1.0 mL/min

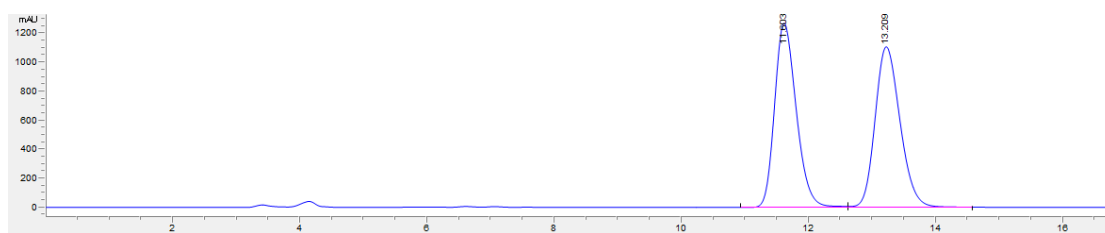

| Peak # | RetTime [min] | Type | Width [min] | Area [mAU*s] | Height [mAU] | Area %  |
|--------|---------------|------|-------------|--------------|--------------|---------|
| 1      | 11.603        | BV   | 0.3658      | 2.99568e4    | 1267.11377   | 49.8705 |
| 2      | 13.209        | MF R | 0.4544      | 3.01124e4    | 1104.56799   | 50.1295 |

Totals : 6.00693e4 2371.68176

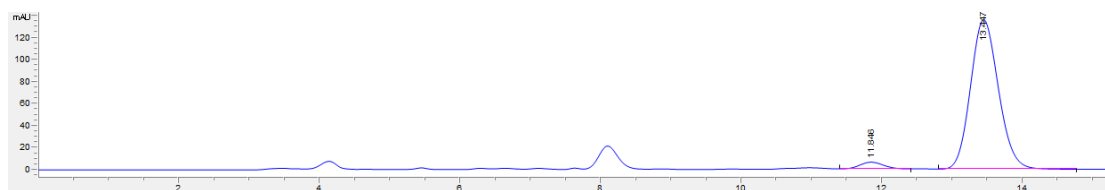

| Peak # | RetTime [min] | Type | Width [min] | Area [mAU*s] | Height [mAU] | Area %  |
|--------|---------------|------|-------------|--------------|--------------|---------|
| 1      | 11.846        | VB   | 0.3702      | 148.08913    | 6.21129      | 3.8155  |
| 2      | 13.447        | BB   | 0.4276      | 3733.18359   | 135.44951    | 96.1845 |

Totals : 3881.27272 141.66079



Compound **7o**:

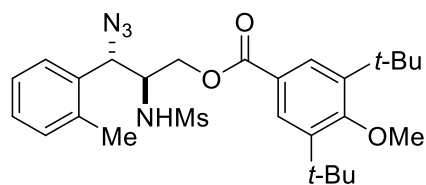

Chiralpak IA, *i*PrOH/Hexane = 20/80, 1.0 mL/min

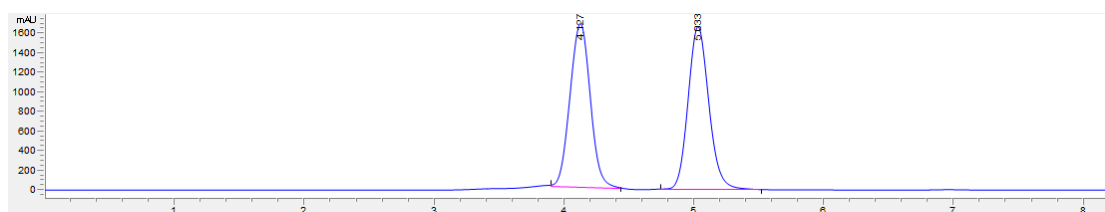

| Peak # | RetTime [min] | Type | Width [min] | Area [mAU*s] | Height [mAU] | Area %  |
|--------|---------------|------|-------------|--------------|--------------|---------|
| 1      | 4.127         | MM R | 0.1834      | 1.85839e4    | 1688.84778   | 49.5952 |
| 2      | 5.033         | FM R | 0.1876      | 1.88873e4    | 1677.95850   | 50.4048 |

Totals : 3.74712e4 3366.80627

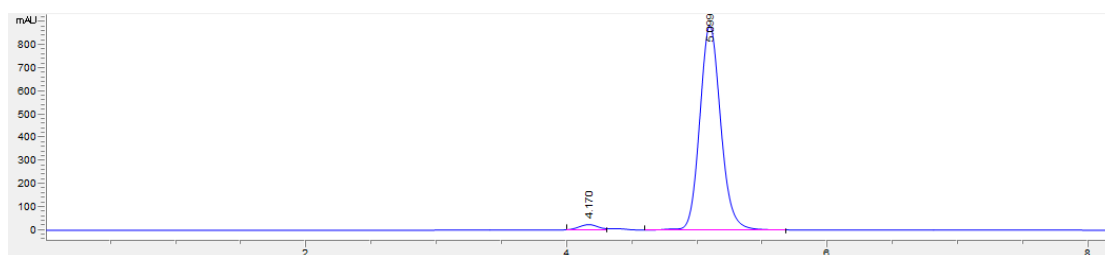

| Peak # | RetTime [min] | Type | Width [min] | Area [mAU*s] | Height [mAU] | Area %  |
|--------|---------------|------|-------------|--------------|--------------|---------|
| 1      | 4.170         | MF R | 0.1754      | 249.27396    | 23.68753     | 2.4588  |
| 2      | 5.099         | MF R | 0.1860      | 9888.79980   | 886.18738    | 97.5412 |

Totals : 1.01381e4 909.87491
